# Supplementary material for: Oxidative Stress and Its Modulation by Ladostigil Alter the Expression of Abundant Long Non-Coding RNAs in SH-SY5Y Cells
Source: MDPI journal article supplement (doi:10.3390/ncrna8060072), 2022-10-25
Supplement: s1 [file s1]

Supplementary Figure S1

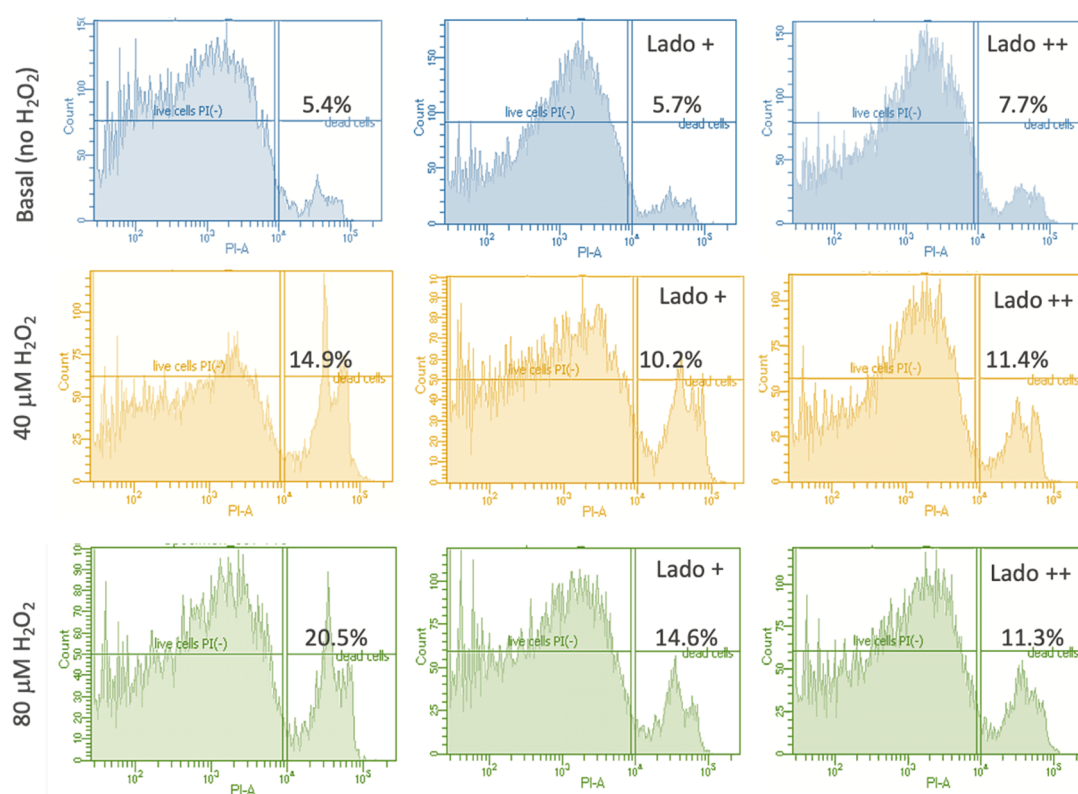

**Figure S1.** Flow cytometry analysis in naïve (untreated) and cells under oxidative stress condition in response to treatment with ladostigil (24 h). In each condition, 50 k cells were tested and split to live and death cell in basal condition (blue), following 40  $\mu M$  and 80  $\mu M$   $H_2O_2$  (yellow and green panels, respectively), and by the addition of ladostigil at 5.4  $\mu M$  (middle), 54  $\mu M$  (right). The data is of a representative experiment performed with 9 different biological samples using predetermined gates on the flow cytometry (shown by the vertical double lines in each panel). The high fluorescence of PI (x-axis, above the vertical line) indicates the fraction of dead cells (in % from total).
