# Supplementary material for: Oxidative Stress and Its Modulation by Ladostigil Alter the Expression of Abundant Long Non-Coding RNAs in SH-SY5Y Cells
Source: Noncoding RNA. 2022 Oct 25;8(6):72. doi: 10.3390/ncrna8060072 (PMC9680243; doi:10.3390/ncrna8060072)
Supplement: Supplementary file 1 [file ncrna-08-00072-s001.zip]

Archive with 6 entries (6 files):
- SH-ncRNA-Suppl Table S5 (GAS5).xlsx
- Supplementary Figure S1.pdf
- SH-ncRNA-Suppl Table S1 (all RNA-seq TMM) .xlsx
- SH-ncRNA-Suppl Table S2 (sinlado, DE).xlsx
- SH-ncRNA-Suppl Table S3- (780).xlsx
- SH-ncRNA-Suppl Table S4 (SNHG).xlsx
