# Supplementary material for: Oxidative Stress and Its Modulation by Ladostigil Alter the Expression of Abundant Long Non-Coding RNAs in SH-SY5Y Cells
Source: Noncoding RNA. 2022 Oct 25;8(6):72. doi: 10.3390/ncrna8060072 (PMC9680243; doi:10.3390/ncrna8060072)
Supplement: Supplementary file 1 [file ncrna-08-00072-s001.zip › SH-ncRNA-Suppl Table S1 (all RNA-seq TMM) .xlsx]

## Sheet: Sheet1
Table S1. Expression pofile for all 18 RNA-seq samples (6 groups) normalizd by TMM
	ensemblID	Description	Gene_type	gene_name	NT_10h_1	NT_10h_2	NT_10h_3	Lado_10h_1	Lado_10h_2	Lado_10h_3	sin1_10h_1	sin1_10h_2	sin1_10h_3	sin1_Lado_10h_1	sin1_Lado_10h_2	sin1_Lado_10h_3	sin1_26h_1	sin1_26h_2	sin1_26h_3	sin1_Lado_26h_1	sin1_Lado_26h_2	sin1_Lado_26h_3
1	ENSG00000000003	protein_coding	tetraspanin 6 [Source:HGNC Symbol;Acc:HGNC:11858]	TSPAN6	18.3349	19.7889	18.1626	17.7876	18.5887	17.16	20.5068	16.6565	18.5652	16.637	22.5285	18.3573	20.052	21.8966	19.4743	21.1985	21.4494	20.7141
2	ENSG00000000419	protein_coding	dolichyl-phosphate mannosyltransferase subunit 1, catalytic [Source:HGNC Symbol;Acc:HGNC:3005]	DPM1	46.6707	48.3349	48.3586	41.5815	49.0895	46.0042	48.7279	46.6652	45.3643	48.2746	44.3866	45.078	50.0745	43.9566	46.171	45.5333	46.6365	44.2917
3	ENSG00000000457	protein_coding	SCY1 like pseudokinase 3 [Source:HGNC Symbol;Acc:HGNC:19285]	SCYL3	24.0405	21.8929	25.1915	22.8121	23.9203	25.258	23.9139	23.8046	24.3911	23.3191	25.2776	23.1439	24.6495	26.0363	26.1807	24.9155	26.2065	28.5609
4	ENSG00000000460	protein_coding	chromosome 1 open reading frame 112 [Source:HGNC Symbol;Acc:HGNC:25565]	C1orf112	75.9681	75.1181	71.6944	69.0137	76.6123	73.5759	73.7346	73.5718	73.484	74.7301	73.553	69.9576	61.3745	65.9077	61.1744	56.3939	56.8303	57.9399
5	ENSG00000001036	protein_coding	alpha-L-fucosidase 2 [Source:HGNC Symbol;Acc:HGNC:4008]	FUCA2	29.4256	29.0578	26.3161	31.9369	29.6362	28.9213	28.3496	27.5136	30.7607	29.6375	31.7143	27.6149	31.2966	29.0321	28.0723	28.8648	27.3108	30.3087
6	ENSG00000001084	protein_coding	glutamate-cysteine ligase catalytic subunit [Source:HGNC Symbol;Acc:HGNC:4311]	GCLC	44.1064	47.9937	46.6717	46.2594	46.9761	45.7343	50.335	51.7902	50.8018	49.7746	48.2084	48.2339	48.3574	47.2248	47.2887	48.7856	44.6827	47.3783
7	ENSG00000001167	protein_coding	nuclear transcription factor Y subunit alpha [Source:HGNC Symbol;Acc:HGNC:7804]	NFYA	136.294	134.542	132.48	122.377	133.147	136.933	138.598	137.77	130.112	125.55	130.411	131.184	117.875	114.549	117.835	110.639	112.301	113.686
8	ENSG00000001460	protein_coding	sperm tail PG-rich repeat containing 1 [Source:HGNC Symbol;Acc:HGNC:28070]	STPG1	10.5778	12.169	11.5273	10.3954	11.1916	10.9515	9.38558	10.7222	12.1179	9.86401	12.203	11.7297	10.5245	10.8938	10.6615	9.98944	11.0008	9.92937
9	ENSG00000001461	protein_coding	NIPA like domain containing 3 [Source:HGNC Symbol;Acc:HGNC:25233]	NIPAL3	12.8857	12.3965	12.8769	12.9942	12.3925	13.7666	12.9212	13.1499	12.3509	12.8187	12.8064	13.1499	19.498	17.2123	18.2706	16.9588	18.094	16.4002
10	ENSG00000001497	protein_coding	LAS1 like ribosome biogenesis factor [Source:HGNC Symbol;Acc:HGNC:25726]	LAS1L	91.8028	93.2579	97.392	93.5583	95.3451	93.9365	93.5986	96.7695	89.5635	96.7309	94.3382	96.8361	90.5108	90.9091	96.5549	95.8289	90.8521	95.7608
11	ENSG00000001617	protein_coding	semaphorin 3F [Source:HGNC Symbol;Acc:HGNC:10728]	SEMA3F	4.48757	3.01382	3.8237	3.23412	3.2182	3.9333	3.72852	2.76484	3.41786	3.6365	3.55361	4.62878	3.98824	4.30307	3.7831	3.60084	4.33236	3.83043
12	ENSG00000001629	protein_coding	ankyrin repeat and IBR domain containing 1 [Source:HGNC Symbol;Acc:HGNC:22215]	ANKIB1	178.605	181.398	185.056	176.548	184.926	176.15	181.669	172.769	173.379	183.598	183.178	177.524	190.992	193.692	196.248	178.648	180.897	186.947
13	ENSG00000001630	protein_coding	cytochrome P450 family 51 subfamily A member 1 [Source:HGNC Symbol;Acc:HGNC:2649]	CYP51A1	2.43611	4.15111	4.32978	4.90892	3.3623	4.01043	3.34281	4.45072	3.96161	4.59108	5.22984	4.73397	3.76667	3.37709	4.04103	3.54277	3.56782	4.09075
14	ENSG00000001631	protein_coding	KRIT1 ankyrin repeat containing [Source:HGNC Symbol;Acc:HGNC:1573]	KRIT1	25.6432	23.087	23.1671	26.5082	25.1212	23.8312	24.8782	22.4559	25.2456	24.5918	21.4557	23.1965	27.7515	26.8533	26.6106	28.4583	26.4189	28.1518
15	ENSG00000002016	protein_coding	RAD52 homolog, DNA repair protein [Source:HGNC Symbol;Acc:HGNC:9824]	RAD52	12.5652	14.8985	15.4073	14.9578	13.2571	13.9208	13.1141	15.3078	13.05	14.046	13.2087	12.5713	12.9618	12.5279	14.4875	11.906	12.2325	13.3507
16	ENSG00000002330	protein_coding	BCL2 associated agonist of cell death [Source:HGNC Symbol;Acc:HGNC:936]	BAD	19.7453	19.6751	16.9817	21.8303	20.2698	19.975	18.3212	18.4098	19.7304	16.0461	18.3044	19.0411	13.848	13.8352	15.6912	14.4615	13.8041	13.9829
17	ENSG00000002549	protein_coding	leucine aminopeptidase 3 [Source:HGNC Symbol;Acc:HGNC:18449]	LAP3	41.9267	46.2309	44.1975	42.5633	43.0854	47.0068	45.5779	46.8675	44.4322	44.6835	46.6663	45.1306	40.9348	38.6731	36.6272	39.7254	39.5859	39.8662
18	ENSG00000002834	protein_coding	LIM and SH3 protein 1 [Source:HGNC Symbol;Acc:HGNC:6513]	LASP1	84.1739	86.6616	79.3981	87.8986	82.6164	86.2241	84.2131	81.664	90.1849	84.8214	84.8173	82.1082	90.2892	91.3448	88.2149	89.3823	89.5354	86.7983
19	ENSG00000002919	protein_coding	sorting nexin 11 [Source:HGNC Symbol;Acc:HGNC:14975]	SNX11	23.6559	21.2674	21.6489	22.0613	22.1912	23.2142	21.5354	20.0283	21.9054	23.2282	22.5285	23.1439	22.2123	21.5698	21.4519	20.2112	22.3414	20.6769
20	ENSG00000003056	protein_coding	mannose-6-phosphate receptor, cation dependent [Source:HGNC Symbol;Acc:HGNC:6752]	M6PR	69.365	70.5689	72.0881	66.2994	69.1192	71.5321	64.7991	69.8629	70.3768	68.0935	73.0166	70.5888	71.5667	69.2848	68.8265	73.585	69.4451	72.4435
21	ENSG00000003096	protein_coding	kelch like family member 13 [Source:HGNC Symbol;Acc:HGNC:22931]	KLHL13	198.799	200.22	199.957	197.916	205.965	203.143	198.383	193.337	206.781	201.417	215.898	200.458	208.552	204.75	205.878	192.239	206.382	209
22	ENSG00000003147	protein_coding	islet cell autoantigen 1 [Source:HGNC Symbol;Acc:HGNC:5343]	ICA1	185.913	193.169	210.36	192.95	211.152	202.295	203.718	194.079	195.362	197.235	205.171	203.088	364.314	350.237	383.21	350.095	401.72	369.469
23	ENSG00000003249	protein_coding	dysbindin domain containing 1 [Source:HGNC Symbol;Acc:HGNC:28455]	DBNDD1	53.8508	54.1919	51.6762	52.3811	50.4345	55.876	48.6636	54.1505	57.6376	48.9109	49.7505	55.3875	48.6897	50.7653	51.2867	50.2957	49.6947	51.3575
24	ENSG00000003393	protein_coding	alsin Rho guanine nucleotide exchange factor ALS2 [Source:HGNC Symbol;Acc:HGNC:443]	ALS2	72.3139	71.4788	73.2127	71.266	67.7263	70.9922	70.7133	73.5044	76.0474	73.3664	75.0281	73.1662	77.826	76.1479	81.3366	81.1352	75.7313	76.088
25	ENSG00000003402	protein_coding	CASP8 and FADD like apoptosis regulator [Source:HGNC Symbol;Acc:HGNC:1876]	CFLAR	13.3986	13.9887	14.845	12.3589	15.7067	12.3012	14.2712	13.5545	15.3027	14.3642	14.4156	15.2539	22.0461	19.3366	19.3884	21.2566	18.3063	17.8134
26	ENSG00000003509	protein_coding	NADH:ubiquinone oxidoreductase complex assembly factor 7 [Source:HGNC Symbol;Acc:HGNC:28816]	NDUFAF7	41.0292	38.2699	41.1048	39.3292	45.439	38.5618	39.278	36.0104	36.2759	40.7743	38.7544	36.925	40.2701	40.6885	42.2589	44.4879	42.6015	41.986
27	ENSG00000003756	protein_coding	RNA binding motif protein 5 [Source:HGNC Symbol;Acc:HGNC:9902]	RBM5	127.896	121.861	133.717	124.167	126.422	120.313	133.391	123.474	127.238	127.778	124.443	128.343	130.892	125.933	135.676	144.266	133.708	140.647
28	ENSG00000003987	protein_coding	myotubularin related protein 7 [Source:HGNC Symbol;Acc:HGNC:7454]	MTMR7	23.3353	22.1203	23.2796	25.2954	25.5535	24.0626	27.771	22.5234	22.9152	23.1372	24.1377	23.8803	25.425	26.9078	26.0088	28.0517	27.0985	26.8874
29	ENSG00000003989	protein_coding	solute carrier family 7 member 2 [Source:HGNC Symbol;Acc:HGNC:11060]	SLC7A2	19.1683	21.2105	21.0866	19.6357	22.4794	21.556	17.4855	20.8375	19.7304	20.0462	21.1876	22.0393	17.3931	17.2123	15.5193	15.6811	18.3913	19.1893
30	ENSG00000004059	protein_coding	ADP ribosylation factor 5 [Source:HGNC Symbol;Acc:HGNC:658]	ARF5	94.6877	87.7989	81.0288	90.3242	89.9655	91.43	78.6846	92.5885	93.4474	83.8668	91.4551	85.2641	84.3623	86.2247	82.4973	84.8522	87.4966	82.7819
31	ENSG00000004139	protein_coding	sterile alpha and TIR motif containing 1 [Source:HGNC Symbol;Acc:HGNC:17074]	SARM1	117.51	116.686	112.631	123.589	112.205	117.151	113.334	115.179	116.518	120.141	115.459	122.4	112.169	118.089	114.396	118.654	117.653	115.582
32	ENSG00000004399	protein_coding	plexin D1 [Source:HGNC Symbol;Acc:HGNC:9107]	PLXND1	17.3733	17.5143	16.7006	20.502	18.1084	19.3966	17.5497	19.7585	19.342	17.7734	17.0975	18.6729	14.7897	14.4888	14.4016	13.7645	12.36	12.9416
33	ENSG00000004455	protein_coding	adenylate kinase 2 [Source:HGNC Symbol;Acc:HGNC:362]	AK2	135.14	130.561	128.656	130.058	126.086	128.835	135.191	130.892	126.849	129.914	133.629	132.183	110.507	111.825	118.394	120.686	113.321	113.611
34	ENSG00000004478	protein_coding	FKBP prolyl isomerase 4 [Source:HGNC Symbol;Acc:HGNC:3720]	FKBP4	261.689	259.018	238.981	260.404	254.382	264.38	257.525	258.209	251.834	251.6	261.693	257.739	195.534	188.137	181.675	179.578	180.557	181.443
35	ENSG00000004487	protein_coding	lysine demethylase 1A [Source:HGNC Symbol;Acc:HGNC:29079]	KDM1A	380.674	382.471	386.644	373.771	379.795	397.726	392.716	390.248	384.665	371.196	380.169	370.986	438.374	432.54	429.037	432.45	435.444	433.062
36	ENSG00000004534	protein_coding	RNA binding motif protein 6 [Source:HGNC Symbol;Acc:HGNC:9903]	RBM6	169.438	173.949	204.512	182.439	187.856	170.405	187.84	180.254	167.009	185.507	168.897	178.155	194.925	190.969	212.369	210.185	193.639	192.972
37	ENSG00000004660	protein_coding	calcium/calmodulin dependent protein kinase kinase 1 [Source:HGNC Symbol;Acc:HGNC:1469]	CAMKK1	8.39816	11.0317	11.2462	9.81785	9.46246	8.21366	11.6355	11.1942	9.70983	9.81855	9.25279	9.09975	8.475	8.27932	8.64093	7.84055	8.70719	6.95428
38	ENSG00000004700	protein_coding	RecQ like helicase [Source:HGNC Symbol;Acc:HGNC:9948]	RECQL	68.3392	71.5356	72.9315	64.8556	72.4335	63.974	69.8776	64.1983	61.9876	69.3663	71.4745	70.3258	58.2726	61.2778	62.2491	59.5301	62.5643	63.2951
39	ENSG00000004766	protein_coding	VPS50 subunit of EARP/GARPII complex [Source:HGNC Symbol;Acc:HGNC:25956]	VPS50	50.3249	54.0782	50.7203	55.7885	58.6481	47.8552	54.9635	50.7113	52.8992	54.6839	54.6451	48.4443	50.7946	51.8547	54.511	49.5987	54.6217	53.5145
40	ENSG00000004777	protein_coding	Rho GTPase activating protein 33 [Source:HGNC Symbol;Acc:HGNC:23085]	ARHGAP33	35.8364	38.8954	41.0486	44.4113	37.9459	38.4461	35.4852	35.6058	36.8197	39.2742	38.4862	41.2382	35.7833	36.8756	38.4328	39.377	37.8869	43.7338
41	ENSG00000004779	protein_coding	NADH:ubiquinone oxidoreductase subunit AB1 [Source:HGNC Symbol;Acc:HGNC:7694]	NDUFAB1	50.0684	49.6428	47.1215	53.9404	50.5305	54.5264	50.9135	52.3297	55.8509	49.5019	56.2543	50.2327	47.1941	46.0809	43.7635	45.4752	46.9339	46.5974
42	ENSG00000004838	protein_coding	zinc finger MYND-type containing 10 [Source:HGNC Symbol;Acc:HGNC:19412]	ZMYND10	0.769297	1.9334	1.74316	1.79031	1.34492	2.15946	1.99283	1.48357	1.47589	1.90916	1.54213	1.73579	2.04951	1.14385	2.1065	2.20697	1.82639	1.89662
43	ENSG00000004864	protein_coding	solute carrier family 25 member 13 [Source:HGNC Symbol;Acc:HGNC:10983]	SLC25A13	130.524	131.187	125.845	130.808	130.265	131.92	129.341	130.824	134.229	124.687	128.064	131.552	128.621	126.532	119.039	122.254	127.974	127.631
44	ENSG00000004866	protein_coding	suppression of tumorigenicity 7 [Source:HGNC Symbol;Acc:HGNC:11351]	ST7	27.8229	29.8539	28.2842	27.5477	31.1253	32.0063	30.6638	29.5366	28.6634	31.5921	30.5074	31.5598	28.527	30.067	30.3507	30.1426	32.3228	31.536
45	ENSG00000004897	protein_coding	cell division cycle 27 [Source:HGNC Symbol;Acc:HGNC:1728]	CDC27	174.502	175.712	174.597	166.268	169.94	166.201	172.733	168.925	166.077	174.279	167.422	163.585	192.876	192.222	185.415	183.701	179.453	190.146
46	ENSG00000004961	protein_coding	holocytochrome c synthase [Source:HGNC Symbol;Acc:HGNC:4837]	HCCS	22.1814	21.3242	21.0304	19.7512	20.9903	22.4815	20.8283	21.1747	19.9634	21.7735	21.3887	20.0405	20.6613	20.8072	19.7753	20.6758	21.5344	21.3091
47	ENSG00000004975	protein_coding	dishevelled segment polarity protein 2 [Source:HGNC Symbol;Acc:HGNC:3086]	DVL2	60.9027	61.3569	59.1549	63.354	60.6654	65.7864	58.3063	62.2427	59.4242	62.9115	62.2887	66.9068	61.7623	60.5697	57.3483	60.7497	61.2476	59.2787
48	ENSG00000005007	protein_coding	UPF1 RNA helicase and ATPase [Source:HGNC Symbol;Acc:HGNC:9962]	UPF1	152.321	147.336	149.237	154.256	142.369	149.234	152.355	162.519	165.611	146.733	146.503	154.222	125.408	123.754	121.231	129.166	131.118	123.392
49	ENSG00000005022	protein_coding	solute carrier family 25 member 5 [Source:HGNC Symbol;Acc:HGNC:10991]	SLC25A5	190.657	193.055	188.205	199.707	199.624	205.958	195.169	195.09	203.052	199.689	209.395	204.613	189.663	186.775	180.815	174.989	191.261	191.931
50	ENSG00000005059	protein_coding	mitochondrial calcium uniporter dominant negative subunit beta [Source:HGNC Symbol;Acc:HGNC:26076]	MCUB	10.1932	11.6572	11.4149	10.4531	11.9121	10.6816	10.4784	12.0709	10.0205	11.0459	12.6053	10.2043	12.3525	12.2556	11.3063	12.7772	13.1245	12.0119
51	ENSG00000005075	protein_coding	RNA polymerase II subunit J [Source:HGNC Symbol;Acc:HGNC:9197]	POLR2J	23.7841	25.5322	24.0668	26.3927	27.1866	25.7593	24.8139	22.5908	20.7402	24.6828	25.4787	25.0375	22.7662	20.2625	23.9453	21.1985	23.3607	24.7304
52	ENSG00000005100	protein_coding	DEAH-box helicase 33 [Source:HGNC Symbol;Acc:HGNC:16718]	DHX33	115.587	112.364	112.012	115.273	111.868	109.94	113.141	119.023	117.838	113.413	111.503	111.301	112.391	109.374	113.794	106.399	110.73	108.888
53	ENSG00000005108	protein_coding	thrombospondin type 1 domain containing 7A [Source:HGNC Symbol;Acc:HGNC:22207]	THSD7A	103.919	97.2953	101.722	94.7134	101.637	102.112	96.3629	90.0934	90.3403	97.14	97.7577	97.3095	103.805	109.919	111.687	100.882	108.734	108.442
54	ENSG00000005156	protein_coding	DNA ligase 3 [Source:HGNC Symbol;Acc:HGNC:6600]	LIG3	111.42	113.388	119.378	112.617	110.187	111.366	111.534	115.719	112.867	118.232	119.75	111.248	112.114	109.864	110.656	131.199	109.668	113.983
55	ENSG00000005175	protein_coding	RNA polymerase II associated protein 3 [Source:HGNC Symbol;Acc:HGNC:26151]	RPAP3	57.505	59.3666	57.1306	55.7885	58.7441	53.8322	54.9635	52.3297	49.6367	57.3203	59.8079	55.0719	50.5177	53.2164	55.9726	50.5861	56.7454	55.2623
56	ENSG00000005189	protein_coding	RNA exonuclease 5 [Source:HGNC Symbol;Acc:HGNC:24661]	REXO5	20.8351	21.7223	21.3115	20.733	20.3659	22.4044	21.4068	22.0513	21.3616	19.8644	21.5898	20.8821	21.9907	20.9162	20.936	23.6959	21.5768	23.8379
57	ENSG00000005194	protein_coding	cytokine induced apoptosis inhibitor 1 [Source:HGNC Symbol;Acc:HGNC:28050]	CIAPIN1	52.6969	52.2017	48.8647	55.904	48.7053	55.1433	53.9349	52.06	52.2777	51.6838	50.4881	55.2823	46.5294	47.715	45.7841	44.6621	48.378	47.8246
58	ENSG00000005238	protein_coding	family with sequence similarity 214 member B [Source:HGNC Symbol;Acc:HGNC:25666]	FAM214B	12.3088	10.2925	10.2903	10.2221	10.6153	11.0287	10.2856	11.7337	10.642	9.4549	10.5267	11.4667	11.1892	12.2011	13.4128	10.2798	10.9158	11.3053
59	ENSG00000005249	protein_coding	protein kinase cAMP-dependent type II regulatory subunit beta [Source:HGNC Symbol;Acc:HGNC:9392]	PRKAR2B	135.653	133.973	128.938	129.307	132.186	134.966	138.919	141.681	143.006	137.732	141.34	127.554	123.857	120.54	123.509	126.03	117.653	122.611
60	ENSG00000005302	protein_coding	MSL complex subunit 3 [Source:HGNC Symbol;Acc:HGNC:7370]	MSL3	39.8111	40.6582	42.5106	36.0373	42.5571	40.2585	41.6565	42.6865	40.7813	40.6834	38.084	42.9214	38.2206	39.1089	40.2384	39.0285	39.5009	40.4612
61	ENSG00000005339	protein_coding	CREB binding protein [Source:HGNC Symbol;Acc:HGNC:2348]	CREBBP	220.852	216.597	213.003	209.178	200.105	215.715	205.84	220.513	212.917	207.099	205.439	213.134	223.23	222.616	220.408	235.158	212.625	211.38
62	ENSG00000005379	protein_coding	TSPO associated protein 1 [Source:HGNC Symbol;Acc:HGNC:16831]	TSPOAP1	23.2071	25.1341	27.8905	27.3167	27.811	25.875	24.2354	27.109	25.2456	26.6828	23.4002	26.7733	25.148	25.1648	30.3507	29.4456	26.6737	27.4824
63	ENSG00000005436	protein_coding	GC-rich sequence DNA-binding factor 2 [Source:HGNC Symbol;Acc:HGNC:1317]	GCFC2	22.6302	21.7791	23.2234	25.8729	26.5621	21.4403	22.7568	21.7816	20.0411	24.7282	24.9423	21.0925	27.973	29.3589	28.4592	27.4129	28.0754	26.9618
64	ENSG00000005448	protein_coding	WD repeat domain 54 [Source:HGNC Symbol;Acc:HGNC:25770]	WDR54	26.1561	27.3519	25.8662	29.8578	26.418	29.7311	27.9639	29.5366	28.1197	26.3646	25.2105	27.8779	33.0137	31.2653	31.5115	29.4456	34.3615	33.5442
65	ENSG00000005469	protein_coding	carnitine O-octanoyltransferase [Source:HGNC Symbol;Acc:HGNC:2366]	CROT	24.6816	24.8498	23.6732	25.0644	25.8897	23.5612	26.6782	26.7043	24.9348	24.8191	21.2546	23.1965	19.8858	19.8268	19.8183	18.4688	19.0284	20.0447
66	ENSG00000005471	protein_coding	ATP binding cassette subfamily B member 4 [Source:HGNC Symbol;Acc:HGNC:45]	ABCB4	6.02616	7.61985	5.17325	8.72056	6.34033	7.75092	5.84991	6.94583	6.36965	6.72753	7.84476	6.83796	9.36128	9.53211	9.67269	10.396	8.79214	8.88809
67	ENSG00000005483	protein_coding	lysine methyltransferase 2E (inactive) [Source:HGNC Symbol;Acc:HGNC:18541]	KMT2E	219.314	215.005	230.378	208.716	220.519	206.961	208.218	190.437	190.313	217.917	214.759	205.349	250.76	247.508	257.809	229.351	217.043	218.744
68	ENSG00000005486	protein_coding	rhomboid domain containing 2 [Source:HGNC Symbol;Acc:HGNC:23082]	RHBDD2	71.2882	70.9101	66.4087	75.0199	64.5081	69.4112	65.9562	75.1228	71.6197	66.0025	62.2217	71.9564	49.2436	48.4231	48.6644	52.5026	52.5829	53.1798
69	ENSG00000005700	protein_coding	inhibitor of Bruton tyrosine kinase [Source:HGNC Symbol;Acc:HGNC:17853]	IBTK	89.7513	87.1165	85.9771	82.6432	91.4064	80.0928	91.7344	83.2825	83.5045	92.7308	88.9743	86.9999	83.6976	90.1465	97.1568	82.471	85.288	89.2899
70	ENSG00000005801	protein_coding	zinc finger protein 195 [Source:HGNC Symbol;Acc:HGNC:12986]	ZNF195	142.833	148.587	165.206	152.234	157.548	142.486	151.584	145.39	143.628	162.461	144.759	147.595	171.66	171.796	191.39	172.26	180.642	184.344
71	ENSG00000005810	protein_coding	MYC binding protein 2 [Source:HGNC Symbol;Acc:HGNC:23386]	MYCBP2	171.681	168.262	146.707	169.098	165.281	171.908	165.083	158.945	160.484	164.87	169.567	182.837	173.544	169.072	167.574	164.303	165.564	167.312
72	ENSG00000005812	protein_coding	F-box and leucine rich repeat protein 3 [Source:HGNC Symbol;Acc:HGNC:13599]	FBXL3	33.2721	33.152	33.2325	35.5175	34.1994	34.3585	33.4924	33.313	31.4598	35.0013	33.3235	34.4002	32.8476	34.7513	36.7132	32.1753	34.7013	35.5152
73	ENSG00000005882	protein_coding	pyruvate dehydrogenase kinase 2 [Source:HGNC Symbol;Acc:HGNC:8810]	PDK2	22.2455	22.3478	23.1671	27.6632	21.7589	25.2194	19.7354	23.1303	21.9054	25.3191	25.4117	25.5635	25.702	26.6899	26.9546	23.3474	26.3339	25.8461
74	ENSG00000005884	protein_coding	integrin subunit alpha 3 [Source:HGNC Symbol;Acc:HGNC:6139]	ITGA3	13.2704	13.5906	14.4514	13.1097	12.5366	13.4581	12.0855	12.2058	14.0598	12.3186	13.2087	13.2551	13.5157	13.236	14.6165	12.8933	15.0783	13.0532
75	ENSG00000005889	protein_coding	zinc finger protein X-linked [Source:HGNC Symbol;Acc:HGNC:12869]	ZFX	74.3654	77.0515	79.3981	76.2327	80.551	76.7379	83.1845	76.3367	70.4545	75.821	76.7713	79.6886	82.3128	84.863	83.2711	82.6452	81.8051	81.7778
76	ENSG00000005893	protein_coding	lysosomal associated membrane protein 2 [Source:HGNC Symbol;Acc:HGNC:6501]	LAMP2	42.5678	42.6484	45.0972	42.5633	43.3256	42.148	44.2922	42.4167	43.5777	41.4107	43.7161	40.7122	45.0892	40.2527	44.1504	40.7709	44.7677	45.2586
77	ENSG00000006007	protein_coding	glycerophosphodiester phosphodiesterase 1 [Source:HGNC Symbol;Acc:HGNC:29644]	GDE1	50.6454	47.6525	51.4513	49.84	52.9802	51.0558	54.3206	53.0041	58.8027	49.5019	52.7677	50.4431	47.8034	45.046	47.3317	48.0306	48.5054	48.5684
78	ENSG00000006015	protein_coding	required for excision 1-B domain containing [Source:HGNC Symbol;Acc:HGNC:26098]	REX1BD	19.9376	20.1869	22.6048	22.9853	20.6541	20.3992	18.514	20.298	21.5947	20.7281	21.3887	23.9329	19.498	20.2625	18.3566	18.7012	20.3451	18.3712
79	ENSG00000006025	protein_coding	oxysterol binding protein like 7 [Source:HGNC Symbol;Acc:HGNC:16387]	OSBPL7	13.2704	15.0691	16.082	17.4989	15.7067	15.6561	14.1427	15.9821	13.5938	14.3187	14.5497	16.9371	14.5681	14.7067	14.2726	15.0422	14.3562	17.5902
80	ENSG00000006042	protein_coding	transmembrane protein 98 [Source:HGNC Symbol;Acc:HGNC:24529]	TMEM98	78.1478	79.0986	74.9558	81.4304	77.0446	82.9464	79.7131	78.6295	79.4652	76.412	79.5204	77.3742	72.6745	71.0278	70.5891	69.8099	76.6233	72.9641
81	ENSG00000006047	protein_coding	Y-box binding protein 2 [Source:HGNC Symbol;Acc:HGNC:17948]	YBX2	11.9241	12.6239	13.8328	14.669	12.5846	14.4607	16.0069	13.015	11.8072	15.1369	12.3371	14.0441	15.0113	17.0489	15.0894	14.868	14.0164	15.7308
82	ENSG00000006071	protein_coding	ATP binding cassette subfamily C member 8 [Source:HGNC Symbol;Acc:HGNC:59]	ABCC8	2.372	3.35501	4.49848	3.52288	3.65049	3.16207	4.17851	2.83228	3.57322	3.31831	3.08426	3.83978	4.04363	3.86731	5.15877	4.47202	4.28988	4.68577
83	ENSG00000006118	protein_coding	transmembrane protein 132A [Source:HGNC Symbol;Acc:HGNC:31092]	TMEM132A	103.022	110.545	118.141	127.17	109.947	113.911	104.334	115.584	108.051	115.323	105.737	122.084	110.12	112.915	118.91	113.601	116.379	124.433
84	ENSG00000006125	protein_coding	adaptor related protein complex 2 subunit beta 1 [Source:HGNC Symbol;Acc:HGNC:563]	AP2B1	426.575	423.527	407.731	425.633	420.239	436.712	423.38	431.248	416.979	412.97	422.544	427.215	410.179	402.364	390.777	382.735	402.315	391.968
85	ENSG00000006194	protein_coding	zinc finger protein 263 [Source:HGNC Symbol;Acc:HGNC:13056]	ZNF263	43.7858	44.1838	50.4954	45.2776	45.1508	48.048	47.2493	49.7672	44.6652	47.2745	49.4153	46.4982	45.5878	43.7932	44.7093	48.3791	44.4704	46.1511
86	ENSG00000006210	protein_coding	C-X3-C motif chemokine ligand 1 [Source:HGNC Symbol;Acc:HGNC:10647]	CX3CL1	11.6036	10.6337	10.6839	12.8787	11.9602	12.3012	11.2498	12.9476	11.0304	12.5914	13.3428	12.4661	12.1863	12.0922	11.5212	12.8933	10.7884	12.7185
87	ENSG00000006282	protein_coding	spermatogenesis associated 20 [Source:HGNC Symbol;Acc:HGNC:26125]	SPATA20	29.1692	28.9441	29.9711	35.3443	32.9985	32.8546	28.9281	29.4018	30.5277	31.3194	33.7258	32.717	33.3461	33.7164	35.2516	34.7307	38.0568	36.8911
88	ENSG00000006283	protein_coding	calcium voltage-gated channel subunit alpha1 G [Source:HGNC Symbol;Acc:HGNC:1394]	CACNA1G	23.4636	21.4948	25.6975	26.797	22.0951	23.1371	23.5925	24.1418	23.5366	23.2736	21.3887	23.9855	24.6495	22.5502	25.149	23.2893	22.5962	22.3876
89	ENSG00000006377	protein_coding	distal-less homeobox 6 [Source:HGNC Symbol;Acc:HGNC:2919]	DLX6	16.9886	16.7182	17.3191	16.7481	14.698	16.1959	15.2998	16.0496	16.1572	15.6824	15.8907	15.4643	17.6701	19.5	16.723	17.2492	18.1789	19.6728
90	ENSG00000006432	protein_coding	mitogen-activated protein kinase kinase kinase 9 [Source:HGNC Symbol;Acc:HGNC:6861]	MAP3K9	46.1578	45.8328	45.9969	42.9098	43.6618	43.1121	44.2279	46.0582	45.5197	44.8653	43.3808	45.7618	46.0863	44.9371	46.042	42.1067	41.9219	43.0645
91	ENSG00000006451	protein_coding	RAS like proto-oncogene A [Source:HGNC Symbol;Acc:HGNC:9839]	RALA	161.937	160.984	163.969	160.897	159.613	166.278	157.755	155.91	155.202	158.097	164.002	154.012	158.255	151.043	151.969	154.197	154.436	148.234
92	ENSG00000006453	protein_coding	BAR/IMD domain containing adaptor protein 2 like 1 [Source:HGNC Symbol;Acc:HGNC:21649]	BAIAP2L1	22.7584	21.2674	19.8495	20.271	19.7415	20.8234	23.2711	20.7026	22.9152	21.0008	20.383	24.4063	22.4338	21.8966	19.5173	19.8627	22.8086	21.4207
93	ENSG00000006459	protein_coding	lysine demethylase 7A [Source:HGNC Symbol;Acc:HGNC:22224]	KDM7A	80.4557	79.0986	78.9482	72.9408	81.7038	77.0464	79.0703	77.7528	77.601	77.6848	78.5817	72.9558	95.7177	91.4538	97.4577	87.2914	94.4199	93.5294
94	ENSG00000006468	protein_coding	ETS variant transcription factor 1 [Source:HGNC Symbol;Acc:HGNC:3490]	ETV1	26.9254	29.797	30.4209	30.7241	30.5969	29.5383	30.6638	27.3787	29.8286	29.4102	30.9097	28.8772	32.7922	33.7709	31.9414	33.8015	33.3422	32.5773
95	ENSG00000006530	protein_coding	acylglycerol kinase [Source:HGNC Symbol;Acc:HGNC:21869]	AGK	52.6328	52.7703	50.6078	53.5939	52.1156	52.8296	53.2921	51.3856	51.967	52.3656	56.3884	50.7061	52.7333	52.4538	52.6194	54.0127	52.0732	57.0846
96	ENSG00000006576	protein_coding	putative homeodomain transcription factor 2 [Source:HGNC Symbol;Acc:HGNC:13411]	PHTF2	110.01	109.919	107.457	107.592	112.445	108.976	113.591	107.627	111.08	112.595	110.363	105.831	113.72	107.631	110.87	102.334	105.208	107.921
97	ENSG00000006607	protein_coding	FERM, ARH/RhoGEF and pleckstrin domain protein 2 [Source:HGNC Symbol;Acc:HGNC:16460]	FARP2	92.5721	92.5755	81.1975	89.2847	87.9961	89.7333	84.6631	85.373	88.6313	85.3214	81.6659	85.8953	82.3128	87.2596	81.2936	75.5597	84.9907	81.7778
98	ENSG00000006625	protein_coding	gamma-glutamylcyclotransferase [Source:HGNC Symbol;Acc:HGNC:21705]	GGCT	53.2738	48.7898	52.1261	48.8582	52.2597	50.9787	54.8992	50.3067	47.617	53.502	50.1528	50.6535	45.4216	47.0069	45.827	42.7455	43.7908	44.4404
99	ENSG00000006634	protein_coding	DBF4 zinc finger [Source:HGNC Symbol;Acc:HGNC:17364]	DBF4	91.0976	86.2067	93.3996	84.3758	89.5812	84.6045	86.7844	85.5078	78.3777	90.2761	91.3881	87.2103	94.499	98.4803	102.015	89.4984	95.6941	96.988
100	ENSG00000006652	protein_coding	interferon related developmental regulator 1 [Source:HGNC Symbol;Acc:HGNC:5456]	IFRD1	25.8997	25.3047	24.5729	20.8485	25.7456	23.7155	27.8996	25.0859	22.7598	26.5465	26.0151	22.8283	22.6554	26.9622	28.5452	27.7033	26.9286	25.2139
101	ENSG00000006695	protein_coding	cytochrome c oxidase assembly factor heme A:farnesyltransferase COX10 [Source:HGNC Symbol;Acc:HGNC:2260]	COX10	18.5272	17.4006	16.082	16.3438	18.8289	17.777	19.2211	17.9378	15.7688	16.5915	17.4328	17.7261	17.7255	15.2514	15.1324	16.1457	17.0321	15.582
102	ENSG00000006704	protein_coding	GTF2I repeat domain containing 1 [Source:HGNC Symbol;Acc:HGNC:4661]	GTF2IRD1	84.1739	83.7047	75.5182	79.0626	76.7564	80.5556	80.2274	80.8548	82.3394	73.9119	74.4246	80.3198	78.103	75.5488	82.9702	82.4129	76.4109	80.7737
103	ENSG00000006712	protein_coding	PAF1 homolog, Paf1/RNA polymerase II complex component [Source:HGNC Symbol;Acc:HGNC:25459]	PAF1	57.3126	61.1863	55.275	54.5757	57.2071	57.11	62.0348	60.3545	56.9384	58.1386	56.9248	59.5955	56.777	53.1619	53.4362	56.9747	56.618	53.2541
104	ENSG00000006715	protein_coding	VPS41 subunit of HOPS complex [Source:HGNC Symbol;Acc:HGNC:12713]	VPS41	142.448	149.156	146.144	146.69	153.993	144.877	146.826	145.255	142.851	145.187	156.895	149.594	157.48	153.331	155.322	154.604	157.366	156.601
105	ENSG00000006744	protein_coding	elaC ribonuclease Z 2 [Source:HGNC Symbol;Acc:HGNC:14198]	ELAC2	72.1216	71.6494	67.6458	76.5215	72.1453	76.121	67.4347	72.4254	72.9402	73.321	69.3289	73.2188	61.4299	64.6005	60.4006	66.0929	62.0971	62.2538
106	ENSG00000006756	protein_coding	arylsulfatase D [Source:HGNC Symbol;Acc:HGNC:717]	ARSD	26.9254	25.0204	25.5288	26.797	24.9771	26.5305	27.5139	26.03	25.7116	25.5919	23.6684	27.2993	25.702	26.1452	25.6649	24.9736	26.971	26.5899
107	ENSG00000006757	protein_coding	patatin like phospholipase domain containing 4 [Source:HGNC Symbol;Acc:HGNC:24887]	PNPLA4	4.16703	3.07069	2.02431	3.46512	3.12213	2.9307	2.89281	3.57407	3.2625	3.00011	2.68197	3.20858	3.10196	3.21368	2.79433	2.90391	3.31298	3.30979
108	ENSG00000006831	protein_coding	adiponectin receptor 2 [Source:HGNC Symbol;Acc:HGNC:24041]	ADIPOR2	87.4434	85.1831	79.8479	87.2056	84.5858	87.6124	89.8701	85.0358	80.9411	83.5941	89.913	87.1577	84.0853	79.4161	77.0376	78.1732	82.6546	80.9969
109	ENSG00000006837	protein_coding	cyclin dependent kinase like 3 [Source:HGNC Symbol;Acc:HGNC:15483]	CDKL3	2.17968	2.16085	2.98024	2.82985	2.54574	2.50652	3.59995	2.4951	2.95179	1.77279	2.01148	2.84038	3.15735	3.05027	3.05227	2.84583	2.50597	2.71477
110	ENSG00000007047	protein_coding	microtubule affinity regulating kinase 4 [Source:HGNC Symbol;Acc:HGNC:13538]	MARK4	55.7099	50.7232	54.1504	51.6881	48.0328	54.0636	50.5921	54.8248	56.084	52.002	51.829	50.8113	57.2755	57.0837	55.4138	59.0655	54.3668	54.407
111	ENSG00000007080	protein_coding	coiled-coil domain containing 124 [Source:HGNC Symbol;Acc:HGNC:25171]	CCDC124	66.2878	65.3943	62.9787	67.7432	68.3507	68.3315	62.6134	72.4254	69.134	67.8207	68.0549	62.4885	63.2579	61.4957	57.7352	69.5195	61.2901	61.4356
112	ENSG00000007168	protein_coding	platelet activating factor acetylhydrolase 1b regulatory subunit 1 [Source:HGNC Symbol;Acc:HGNC:8574]	PAFAH1B1	314.899	311.277	318.998	304.931	319.13	312.119	324.767	308.988	310.715	311.875	311.645	311.759	324.986	322.24	321.95	310.195	329.004	316.773
113	ENSG00000007202	protein_coding	KIAA0100 [Source:HGNC Symbol;Acc:HGNC:28960]	KIAA0100	298.616	300.927	297.068	314.171	293	307.453	309.853	298.333	297.121	296.829	286.904	305.552	273.25	272.455	268.729	266.869	268.224	266.717
114	ENSG00000007255	protein_coding	trafficking protein particle complex 6A [Source:HGNC Symbol;Acc:HGNC:23069]	TRAPPC6A	6.15438	5.85705	5.00455	7.1035	6.10017	5.97708	7.26418	6.00173	6.52501	5.50021	6.36967	6.83796	7.0902	5.77373	6.57743	6.09821	6.58348	7.14022
115	ENSG00000007341	protein_coding	suppression of tumorigenicity 7 like [Source:HGNC Symbol;Acc:HGNC:18441]	ST7L	21.2839	20.1869	18.3875	18.1919	20.4139	19.5123	19.7354	19.6236	18.9536	21.0917	19.7795	21.0925	21.3814	22.4958	21.9677	22.8828	18.9434	20.4909
116	ENSG00000007376	protein_coding	RNA pseudouridine synthase domain containing 1 [Source:HGNC Symbol;Acc:HGNC:14173]	RPUSD1	24.4252	22.4615	22.7173	25.0066	21.7108	23.0214	23.0782	23.4675	23.3813	23.3645	23.8025	24.8797	18.6672	17.7025	17.8837	16.4942	18.7311	19.0778
117	ENSG00000007392	protein_coding	LUC7 like [Source:HGNC Symbol;Acc:HGNC:6723]	LUC7L	116.292	118.62	134.448	129.134	125.654	124.516	125.227	123.946	121.645	132.641	125.918	119.717	111.117	115.148	122.736	132.825	112.259	121.384
118	ENSG00000007402	protein_coding	calcium voltage-gated channel auxiliary subunit alpha2delta 2 [Source:HGNC Symbol;Acc:HGNC:1400]	CACNA2D2	101.804	100.48	106.164	106.264	100.581	105.505	95.7843	103.243	96.3992	94.2308	97.3555	100.728	124.189	116.945	132.924	127.54	128.866	125.4
119	ENSG00000007520	protein_coding	TSR3 ribosome maturation factor [Source:HGNC Symbol;Acc:HGNC:14175]	TSR3	32.2464	32.6971	31.8267	34.6512	31.1253	34.2429	29.8924	31.0202	34.567	32.3649	34.4633	36.7146	31.075	30.884	29.319	27.529	30.7088	29.379
120	ENSG00000007541	protein_coding	phosphatidylinositol glycan anchor biosynthesis class Q [Source:HGNC Symbol;Acc:HGNC:14135]	PIGQ	24.8739	25.3616	30.0273	32.6299	26.9944	29.7311	24.4282	28.5251	29.5179	26.9556	28.2948	33.4534	22.323	26.1452	25.063	26.7159	27.3958	27.2221
121	ENSG00000007545	protein_coding	cramped chromatin regulator homolog 1 [Source:HGNC Symbol;Acc:HGNC:14122]	CRAMP1	22.2455	23.0302	25.3039	23.5628	20.7021	22.2887	21.0211	22.7257	25.0902	22.9554	21.2546	24.0907	24.0402	22.8771	22.7846	22.5924	24.0828	23.0198
122	ENSG00000007866	protein_coding	TEA domain transcription factor 3 [Source:HGNC Symbol;Acc:HGNC:11716]	TEAD3	5.96205	6.99434	6.69148	5.83296	5.95607	7.48099	6.10705	6.81096	6.05893	5.86386	7.77771	6.73276	6.3701	7.18993	8.16805	6.96938	7.56039	6.65677
123	ENSG00000007923	protein_coding	DnaJ heat shock protein family (Hsp40) member C11 [Source:HGNC Symbol;Acc:HGNC:25570]	DNAJC11	101.419	100.252	104.702	98.5828	105.72	101.572	99.77	103.918	99.6617	103.049	89.2425	101.36	97.3794	97.3364	95.5232	100.417	93.3156	94.7567
124	ENSG00000007944	protein_coding	myosin regulatory light chain interacting protein [Source:HGNC Symbol;Acc:HGNC:21155]	MYLIP	4.61578	3.86679	3.37386	4.56241	4.22689	4.62741	3.21424	3.4392	4.50536	3.45468	3.21836	3.47158	4.9853	5.61033	4.55691	4.06547	4.45978	4.61139
125	ENSG00000007968	protein_coding	E2F transcription factor 2 [Source:HGNC Symbol;Acc:HGNC:3114]	E2F2	96.2904	93.9403	96.5485	95.7529	95.2491	95.8646	93.7915	95.6906	87.2331	98.3674	92.1927	96.1523	72.1206	71.0278	70.4602	77.0697	73.6925	75.493
126	ENSG00000008018	protein_coding	proteasome 20S subunit beta 1 [Source:HGNC Symbol;Acc:HGNC:9537]	PSMB1	126.485	125.386	125.62	131.963	127.143	127.678	128.891	128.262	130.966	126.505	129.338	124.819	126.516	122.719	116.631	117.841	123.642	123.243
127	ENSG00000008056	protein_coding	synapsin I [Source:HGNC Symbol;Acc:HGNC:11494]	SYN1	20.4505	19.9595	20.1869	22.8698	20.1257	20.1292	18.964	22.1862	21.2839	21.819	19.9807	20.0931	18.224	19.0642	18.0987	19.1658	18.9434	18.1852
128	ENSG00000008083	protein_coding	jumonji and AT-rich interaction domain containing 2 [Source:HGNC Symbol;Acc:HGNC:6196]	JARID2	57.8896	58.1725	55.5562	57.8098	57.5433	59.6165	55.1563	60.5568	57.8706	55.8203	58.0646	55.5453	66.4152	62.694	66.5481	67.7772	69.9548	64.6339
129	ENSG00000008086	protein_coding	cyclin dependent kinase like 5 [Source:HGNC Symbol;Acc:HGNC:11411]	CDKL5	67.634	66.0766	62.079	62.5455	64.6041	64.9766	66.8562	61.1637	65.9492	62.7296	62.4228	64.3295	69.1294	66.2345	67.8378	68.0095	69.4451	67.3858
130	ENSG00000008128	protein_coding	cyclin dependent kinase 11A [Source:HGNC Symbol;Acc:HGNC:1730]	CDK11A	1.92324	2.21772	3.26139	2.59884	1.87328	1.88953	1.41427	1.61845	2.09732	2.22736	1.60918	2.10399	2.825	1.74301	2.1065	1.91658	1.95381	1.67349
131	ENSG00000008130	protein_coding	NAD kinase [Source:HGNC Symbol;Acc:HGNC:29831]	NADK	54.4278	54.7606	52.2385	59.6579	53.7007	55.529	52.5207	50.9136	52.5884	51.6838	55.3156	58.1227	40.6579	40.4706	35.7675	36.0665	38.7788	39.9406
132	ENSG00000008196	protein_coding	transcription factor AP-2 beta [Source:HGNC Symbol;Acc:HGNC:11743]	TFAP2B	580.948	587.98	630.068	588.609	600.074	615.562	593.927	590.126	561.617	576.34	595.263	609	767.957	764.312	795.869	740.903	814.398	771.293
133	ENSG00000008256	protein_coding	cytohesin 3 [Source:HGNC Symbol;Acc:HGNC:9504]	CYTH3	47.5682	48.8467	50.3267	47.5299	44.7666	50.246	48.5993	47.7441	49.8697	44.0017	46.9344	47.5501	51.6255	53.5977	49.3522	49.8891	48.9726	47.0808
134	ENSG00000008277	protein_coding	ADAM metallopeptidase domain 22 [Source:HGNC Symbol;Acc:HGNC:201]	ADAM22	546.137	527.362	539.03	510.875	553.77	535.816	539.735	497.402	512.679	525.611	541.221	532.467	480.25	481.399	470.609	484.546	467.215	477.316
135	ENSG00000008282	protein_coding	synaptophysin like 1 [Source:HGNC Symbol;Acc:HGNC:11507]	SYPL1	21.348	21.6654	19.7371	22.5233	22.4313	22.8671	22.7568	21.9164	25.1679	22.6827	21.791	23.0387	20.5505	22.5502	25.106	23.3474	25.1871	23.9867
136	ENSG00000008283	protein_coding	cytochrome b561 [Source:HGNC Symbol;Acc:HGNC:2571]	CYB561	264.061	252.194	236.114	259.653	243.478	243.826	245.054	261.918	258.359	244.827	237.622	248.744	215.697	208.018	205.362	204.435	210.034	211.269
137	ENSG00000008294	protein_coding	sperm associated antigen 9 [Source:HGNC Symbol;Acc:HGNC:14524]	SPAG9	376.443	375.136	383.945	363.896	385.992	387.199	390.144	359.093	365.323	372.65	389.087	374.668	471.775	461.082	473.661	443.891	462.203	458.61
138	ENSG00000008300	protein_coding	cadherin EGF LAG seven-pass G-type receptor 3 [Source:HGNC Symbol;Acc:HGNC:3230]	CELSR3	229.379	226.662	241.456	255.726	233.92	251.076	218.054	241.081	239.406	234.736	239.567	251.269	259.9	260.526	261.077	254.44	262.235	258.275
139	ENSG00000008324	protein_coding	SS18 like 2 [Source:HGNC Symbol;Acc:HGNC:15593]	SS18L2	14.6808	15.1828	15.9134	16.7481	16.4753	15.9646	15.2355	15.2404	17.167	15.5915	17.3657	14.6753	14.4574	16.2863	14.6165	13.5322	14.3562	15.582
140	ENSG00000008382	protein_coding	MPN domain containing [Source:HGNC Symbol;Acc:HGNC:25934]	MPND	17.181	17.6849	18.1626	20.3287	18.7808	20.0521	15.7498	16.1845	18.7982	17.9098	18.8408	20.3035	19.2765	18.9008	16.895	19.2239	18.5187	19.115
141	ENSG00000008405	protein_coding	cryptochrome circadian regulator 1 [Source:HGNC Symbol;Acc:HGNC:2384]	CRY1	19.8094	20.1301	20.0744	19.8667	20.462	22.4044	20.8926	19.2865	19.8081	21.5463	20.7853	20.8821	23.2093	22.6592	23.1285	24.3347	22.6812	23.1313
142	ENSG00000008441	protein_coding	nuclear factor I X [Source:HGNC Symbol;Acc:HGNC:7788]	NFIX	60.518	60.7314	61.2355	66.2994	60.2331	66.8276	61.2634	63.1868	61.0554	59.775	64.3002	63.6983	70.625	79.1982	72.9536	73.0042	75.0092	75.493
143	ENSG00000008513	protein_coding	ST3 beta-galactoside alpha-2,3-sialyltransferase 1 [Source:HGNC Symbol;Acc:HGNC:10862]	ST3GAL1	6.21849	6.88061	5.39817	6.46823	6.62853	6.94112	7.77846	7.0807	6.13661	6.18205	7.64361	6.83796	5.87157	5.01117	7.17928	5.98205	5.81895	6.47082
144	ENSG00000008710	protein_coding	polycystin 1, transient receptor potential channel interacting [Source:HGNC Symbol;Acc:HGNC:9008]	PKD1	175.977	172.3	185	198.84	179.835	184.248	164.826	183.221	179.515	174.825	166.282	191.884	164.792	170.162	181.503	171.621	182.554	184.456
145	ENSG00000008735	protein_coding	mitogen-activated protein kinase 8 interacting protein 2 [Source:HGNC Symbol;Acc:HGNC:6883]	MAPK8IP2	144.948	133.745	131.187	143.052	132.523	138.552	128.57	143.165	139.278	134.46	128.466	137.916	127.125	128.711	124.885	123.126	121.136	120.045
146	ENSG00000008838	protein_coding	mediator complex subunit 24 [Source:HGNC Symbol;Acc:HGNC:22963]	MED24	95.457	95.5325	91.8814	98.8138	92.1269	95.9417	91.0915	96.6347	99.8171	95.4582	90.4494	98.5719	86.7995	87.6954	83.3141	79.7994	90.5123	88.9552
147	ENSG00000008853	protein_coding	Rho related BTB domain containing 2 [Source:HGNC Symbol;Acc:HGNC:18756]	RHOBTB2	58.8512	58.6842	56.8495	56.2505	52.2117	58.074	57.0206	66.8283	60.9001	52.8202	58.0646	63.2775	44.203	46.2988	44.3224	45.1267	43.7483	45.1098
148	ENSG00000008869	protein_coding	HEAT repeat containing 5B [Source:HGNC Symbol;Acc:HGNC:29273]	HEATR5B	103.663	104.233	103.071	103.087	101.974	103.307	104.656	104.929	105.255	102.458	104.798	101.938	109.843	107.849	105.239	96.642	103.977	104.017
149	ENSG00000008952	protein_coding	SEC62 homolog, preprotein translocation factor [Source:HGNC Symbol;Acc:HGNC:11846]	SEC62	152.513	153.648	153.567	145.824	152.504	139.979	150.876	137.905	132.054	144.596	154.347	145.333	141.472	143.199	153.86	134.219	147.385	149.945
150	ENSG00000008988	protein_coding	ribosomal protein S20 [Source:HGNC Symbol;Acc:HGNC:10405]	RPS20	502.415	506.152	471.215	535.419	521.732	546.845	509.264	496.593	522.467	510.337	555.235	524.051	581.673	531.619	523.615	501.737	567.199	548.718
151	ENSG00000009307	protein_coding	cold shock domain containing E1 [Source:HGNC Symbol;Acc:HGNC:29905]	CSDE1	823.276	822.091	826.82	803.1	827.557	831.006	843.545	820.08	797.915	822.804	857.626	802.514	887.05	882.401	887.996	911.943	892.678	891.709
152	ENSG00000009335	protein_coding	ubiquitin protein ligase E3C [Source:HGNC Symbol;Acc:HGNC:16803]	UBE3C	137.512	140.854	142.489	137.97	133.483	135.776	144.576	137.703	141.997	138.869	131.685	137.127	140.585	137.753	141.264	138.4	129.716	134.214
153	ENSG00000009413	protein_coding	REV3 like, DNA directed polymerase zeta catalytic subunit [Source:HGNC Symbol;Acc:HGNC:9968]	REV3L	117.061	122.373	108.132	119.605	126.374	113.834	116.741	104.929	101.448	112.232	124.577	118.875	118.041	136.881	140.834	123.126	135.662	139.681
154	ENSG00000009780	protein_coding	family with sequence similarity 76 member A [Source:HGNC Symbol;Acc:HGNC:28530]	FAM76A	15.0654	16.1495	16.5881	14.3803	16.139	14.9234	15.1712	15.0381	16.9339	14.5915	14.2144	14.4649	15.0667	13.6173	12.2091	14.5195	14.3987	14.8011
155	ENSG00000009830	protein_coding	protein O-mannosyltransferase 2 [Source:HGNC Symbol;Acc:HGNC:19743]	POMT2	54.6201	55.1018	55.0501	58.6183	53.3645	59.1538	54.6421	58.7361	51.1125	57.4567	53.17	55.8609	50.6284	52.6717	49.0083	52.5026	53.1351	51.7294
156	ENSG00000009844	protein_coding	vesicle trafficking 1 [Source:HGNC Symbol;Acc:HGNC:20954]	VTA1	82.443	84.7282	82.8282	79.5823	84.5378	77.2778	88.3273	82.5407	82.2617	84.3214	88.7732	80.688	80.8172	79.4161	77.3385	75.6177	78.9593	78.2821
157	ENSG00000009954	protein_coding	bromodomain adjacent to zinc finger domain 1B [Source:HGNC Symbol;Acc:HGNC:961]	BAZ1B	563.318	575.64	566.92	543.62	557.085	558.722	576.056	548.99	545.071	565.203	550.541	545.091	513.208	515.224	514.974	530.95	499.028	490.927
158	ENSG00000010017	protein_coding	RAN binding protein 9 [Source:HGNC Symbol;Acc:HGNC:13727]	RANBP9	61.095	60.5608	62.8662	62.2567	60.7135	59.1152	65.0562	61.1637	63.5411	61.5932	61.6853	58.5961	64.9196	67.2694	65.9892	62.2017	60.9928	63.7413
159	ENSG00000010072	protein_coding	SprT-like N-terminal domain [Source:HGNC Symbol;Acc:HGNC:25356]	SPRTN	27.3742	26.3852	22.8298	25.0066	27.3787	22.9828	27.321	26.2997	27.1098	28.7738	25.2105	26.5103	25.702	26.3086	25.6219	27.1225	24.4226	24.4329
160	ENSG00000010165	protein_coding	eEF1A lysine and N-terminal methyltransferase [Source:HGNC Symbol;Acc:HGNC:24248]	EEF1AKNMT	93.7902	97.5228	88.4513	94.8289	93.8081	92.8182	91.6701	89.9586	91.8938	90.5489	86.5605	96.0997	88.0182	87.423	82.4113	84.2133	82.3148	82.9679
161	ENSG00000010219	protein_coding	dual specificity tyrosine phosphorylation regulated kinase 4 [Source:HGNC Symbol;Acc:HGNC:3095]	DYRK4	4.61578	5.91392	6.12917	5.25544	6.5805	4.93591	5.97848	6.27147	6.60268	5.45475	7.17427	6.10157	4.9299	5.1201	6.14753	5.69166	5.30926	6.13613
162	ENSG00000010244	protein_coding	zinc finger protein 207 [Source:HGNC Symbol;Acc:HGNC:12998]	ZNF207	236.174	230.984	230.828	231.759	231.95	229.134	236.054	232.517	233.813	233.736	223.676	224.759	231.373	238.521	248.266	258.506	242.739	242.916
163	ENSG00000010256	protein_coding	ubiquinol-cytochrome c reductase core protein 1 [Source:HGNC Symbol;Acc:HGNC:12585]	UQCRC1	77.8272	75.2318	77.5425	80.3331	77.525	80.5556	69.3633	75.3251	80.5528	76.9575	76.1009	80.2146	80.3186	74.187	75.447	74.9208	80.361	77.4639
164	ENSG00000010270	protein_coding	STARD3 N-terminal like [Source:HGNC Symbol;Acc:HGNC:19169]	STARD3NL	81.8019	77.8476	75.5744	77.4455	77.525	77.6249	74.8918	79.5736	76.9019	77.4575	82.6046	72.3246	74.6133	74.187	69.8583	67.603	71.5688	71.4022
165	ENSG00000010278	protein_coding	CD9 molecule [Source:HGNC Symbol;Acc:HGNC:1709]	CD9	11.0907	12.4533	10.5152	11.8969	10.4231	12.9568	9.707	12.6778	12.0402	11.2732	11.0631	10.9933	6.3701	7.35334	6.66341	8.13094	6.71091	8.14431
166	ENSG00000010292	protein_coding	non-SMC condensin I complex subunit D2 [Source:HGNC Symbol;Acc:HGNC:24305]	NCAPD2	290.281	284.948	280.199	293.554	279.215	290.216	286.582	292.736	281.585	283.647	280.266	290.824	348.472	339.833	327.539	331.103	334.101	332.913
167	ENSG00000010295	protein_coding	intermediate filament family orphan 1 [Source:HGNC Symbol;Acc:HGNC:24970]	IFFO1	20.6428	20.1869	21.3678	21.7725	17.7721	19.3195	19.0926	22.3211	20.2741	19.5462	17.9692	20.3561	15.8976	15.9595	17.1959	17.83	16.3525	16.6605
168	ENSG00000010318	protein_coding	PHD finger protein 7 [Source:HGNC Symbol;Acc:HGNC:18458]	PHF7	7.43654	7.27867	7.25379	7.68102	5.66787	7.05681	7.13561	7.14813	8.07858	7.5912	6.16853	7.99516	11.1892	9.69552	9.02784	9.35058	8.53729	9.55748
169	ENSG00000010322	protein_coding	nischarin [Source:HGNC Symbol;Acc:HGNC:18006]	NISCH	101.611	105.996	110.044	111.288	97.8909	106.855	102.277	101.423	96.0108	107.868	100.104	109.933	111.061	112.261	115.427	108.664	119.48	117.367
170	ENSG00000010361	protein_coding	fuzzy planar cell polarity protein [Source:HGNC Symbol;Acc:HGNC:26219]	FUZ	28.2076	29.2853	29.2963	37.3656	30.693	35.7853	29.8924	31.4922	34.0232	35.365	32.4518	34.3476	37.6667	37.4203	35.7245	33.9757	38.524	35.2176
171	ENSG00000010404	protein_coding	iduronate 2-sulfatase [Source:HGNC Symbol;Acc:HGNC:5389]	IDS	15.9629	17.0025	16.4194	20.3865	14.9382	17.3914	14.7855	18.6121	16.7009	17.3188	14.6167	17.4105	14.7897	14.2709	15.1324	15.5649	14.7385	14.5036
172	ENSG00000010438	protein_coding	serine protease 3 [Source:HGNC Symbol;Acc:HGNC:9486]	PRSS3	18.5913	18.7653	19.8495	21.2528	18.6848	19.0495	17.0998	17.5332	16.2348	19.3189	18.5056	19.7249	13.6819	12.9637	12.682	12.661	13.2094	15.2102
173	ENSG00000010539	protein_coding	zinc finger protein 200 [Source:HGNC Symbol;Acc:HGNC:12993]	ZNF200	30.0667	28.9441	27.7219	26.9125	28.5315	28.3429	31.1138	29.4018	31.3822	28.4102	30.7085	27.2467	26.2005	23.6941	25.5789	25.0898	25.9092	25.0651
174	ENSG00000010626	protein_coding	leucine rich repeat containing 23 [Source:HGNC Symbol;Acc:HGNC:19138]	LRRC23	7.37243	8.81401	9.50303	8.14304	8.06951	8.48359	8.0356	8.83401	7.76786	9.13671	8.51525	8.36336	10.1922	10.1313	9.75867	12.0803	10.2787	11.4169
175	ENSG00000010803	protein_coding	Scm polycomb group protein homolog 1 [Source:HGNC Symbol;Acc:HGNC:19003]	SCMH1	58.5948	56.6371	53.4194	53.4207	50.7227	58.6525	56.0563	57.3199	56.6277	56.593	53.3041	56.9129	55.503	56.539	56.6605	54.7677	54.7916	55.4111
176	ENSG00000010810	protein_coding	FYN proto-oncogene, Src family tyrosine kinase [Source:HGNC Symbol;Acc:HGNC:4037]	FYN	84.7509	84.2164	78.3297	83.625	83.7692	87.1496	86.0773	84.6312	86.534	81.7304	86.0912	82.3186	95.7731	93.1968	97.5437	95.3643	93.1457	91.1866
177	ENSG00000010818	protein_coding	HIVEP zinc finger 2 [Source:HGNC Symbol;Acc:HGNC:4921]	HIVEP2	37.3109	34.6305	34.5258	36.5571	37.2735	38.1376	36.3852	34.5268	34.9554	32.9558	34.3962	36.3464	35.2294	32.3547	36.7562	37.17	33.8518	32.6888
178	ENSG00000011007	protein_coding	elongin A [Source:HGNC Symbol;Acc:HGNC:11620]	ELOA	117.574	107.986	116.623	106.264	105.384	111.521	113.334	115.584	113.799	117.05	118.811	108.092	109.178	107.903	106.572	113.659	103.424	102.641
179	ENSG00000011009	protein_coding	lysophospholipase 2 [Source:HGNC Symbol;Acc:HGNC:6738]	LYPLA2	71.6729	71.7631	70.5698	76.406	73.3461	74.617	71.7418	74.0439	77.601	67.3662	67.6527	75.691	66.9137	61.2234	61.6043	65.7445	66.9816	67.609
180	ENSG00000011021	protein_coding	chloride voltage-gated channel 6 [Source:HGNC Symbol;Acc:HGNC:2024]	CLCN6	52.761	52.1448	56.6246	55.442	54.9495	52.7525	52.7778	53.6784	57.3268	58.3658	53.3041	55.3349	57.8848	58.391	62.4641	63.5375	58.4443	62.3654
181	ENSG00000011028	protein_coding	mannose receptor C type 2 [Source:HGNC Symbol;Acc:HGNC:16875]	MRC2	80.5839	75.2887	78.4984	87.2634	77.2368	82.4065	74.8275	78.1574	84.6697	78.4121	75.6315	79.8464	90.7324	89.3839	93.2017	92.5185	90.5972	91.1494
182	ENSG00000011105	protein_coding	tetraspanin 9 [Source:HGNC Symbol;Acc:HGNC:21640]	TSPAN9	26.6049	29.8539	27.6656	29.5691	27.6189	30.6181	28.221	31.3574	28.6634	27.6829	28.2277	29.4032	26.976	26.472	27.7714	26.4836	27.4383	26.1064
183	ENSG00000011114	protein_coding	BTB domain containing 7 [Source:HGNC Symbol;Acc:HGNC:18269]	BTBD7	110.33	114.355	115.33	109.44	104.712	107.086	111.534	114.64	110.148	112.55	106.541	107.146	102.808	108.285	102.273	100.359	100.833	103.422
184	ENSG00000011132	protein_coding	amyloid beta precursor protein binding family A member 3 [Source:HGNC Symbol;Acc:HGNC:580]	APBA3	9.61622	11.8278	11.921	11.3772	11.9121	11.877	11.5713	12.3406	11.0304	11.1822	8.98459	11.9927	9.1951	11.6019	10.8334	11.0929	10.4911	11.5657
185	ENSG00000011143	protein_coding	MKS transition zone complex subunit 1 [Source:HGNC Symbol;Acc:HGNC:7121]	MKS1	18.6555	20.9262	22.7173	22.119	21.6628	22.173	20.6354	24.0069	17.8661	21.5917	21.5228	21.9867	23.2093	22.8226	23.5584	23.4055	25.442	23.9123
186	ENSG00000011198	protein_coding	abhydrolase domain containing 5, lysophosphatidic acid acyltransferase [Source:HGNC Symbol;Acc:HGNC:21396]	ABHD5	27.1177	27.295	26.0349	26.2194	26.6582	26.6462	27.0639	26.502	28.5857	27.6829	28.8982	25.0901	22.3784	20.2625	22.9995	21.7212	20.3451	22.3504
187	ENSG00000011243	protein_coding	A-kinase anchoring protein 8 like [Source:HGNC Symbol;Acc:HGNC:29857]	AKAP8L	34.2978	38.4405	44.0288	38.7516	37.994	38.1376	38.1209	41.2703	38.3732	41.047	35.469	41.0804	44.3137	40.0349	45.6551	48.9599	42.0918	43.8082
188	ENSG00000011258	protein_coding	mbt domain containing 1 [Source:HGNC Symbol;Acc:HGNC:19866]	MBTD1	138.73	140.74	149.631	139.875	147.797	143.026	143.934	142.558	138.035	147.324	146.637	141.809	190.715	191.895	194.614	195.549	197.462	189.29
189	ENSG00000011260	protein_coding	UTP18 small subunit processome component [Source:HGNC Symbol;Acc:HGNC:24274]	UTP18	89.1103	89.6186	87.3829	85.9928	91.3584	88.0751	92.3772	91.4421	93.9912	90.1398	88.9743	82.8972	84.8608	85.9524	80.8207	84.6779	77.6002	82.4472
190	ENSG00000011275	protein_coding	ring finger protein 216 [Source:HGNC Symbol;Acc:HGNC:21698]	RNF216	103.022	108.725	102.903	106.091	102.358	107.703	107.163	104.727	105.954	102.731	104.865	102.149	102.143	98.5348	103.261	106.109	100.196	97.7689
191	ENSG00000011295	protein_coding	tetratricopeptide repeat domain 19 [Source:HGNC Symbol;Acc:HGNC:26006]	TTC19	55.1971	59.9921	58.7051	53.9982	56.2464	56.1074	60.042	59.9499	55.3072	56.7294	55.2485	55.8609	58.8819	54.0879	55.7577	53.6061	54.6642	55.002
192	ENSG00000011304	protein_coding	polypyrimidine tract binding protein 1 [Source:HGNC Symbol;Acc:HGNC:9583]	PTBP1	483.247	484.6	456.764	520.866	468.224	493.861	461.822	490.861	507.242	476.018	480.475	491.965	452	449.643	434.325	444.53	454.345	457.792
193	ENSG00000011332	protein_coding	double PHD fingers 1 [Source:HGNC Symbol;Acc:HGNC:20225]	DPF1	27.6306	30.9343	29.465	30.9551	31.6536	31.3122	32.3995	33.0433	30.3723	29.4102	26.9538	31.4546	20.7167	21.1885	20.3341	22.8247	18.1364	21.0488
194	ENSG00000011347	protein_coding	synaptotagmin 7 [Source:HGNC Symbol;Acc:HGNC:11514]	SYT7	35.7082	38.0424	36.6626	35.171	33.8631	35.8625	33.2352	37.7637	32.392	33.0012	34.7985	33.5586	32.9583	32.3002	31.1246	29.9683	30.1566	29.3418
195	ENSG00000011376	protein_coding	leucyl-tRNA synthetase 2, mitochondrial [Source:HGNC Symbol;Acc:HGNC:17095]	LARS2	47.5682	47.4819	44.7598	44.1226	44.1902	44.2304	45.0636	47.4744	48.1608	45.0017	43.7161	45.0254	40.9902	41.1787	37.3151	42.397	40.8176	41.7257
196	ENSG00000011405	protein_coding	phosphatidylinositol-4-phosphate 3-kinase catalytic subunit type 2 alpha [Source:HGNC Symbol;Acc:HGNC:8971]	PIK3C2A	155.206	155.468	154.804	149.231	158.845	145.339	153.833	142.625	142.307	154.688	150.257	149.068	153.824	163.952	168.692	151.642	158.343	158.572
197	ENSG00000011422	protein_coding	plasminogen activator, urokinase receptor [Source:HGNC Symbol;Acc:HGNC:9053]	PLAUR	20.5146	20.5281	22.3799	23.1008	21.951	20.5149	21.2783	21.377	20.8956	22.6372	20.45	22.1971	18.501	15.8505	15.9492	17.4815	18.3488	19.0406
198	ENSG00000011426	protein_coding	anillin actin binding protein [Source:HGNC Symbol;Acc:HGNC:14082]	ANLN	163.54	168.149	172.292	157.548	174.071	159.453	172.926	154.696	156.522	169.734	174.998	163.007	175.482	185.25	186.876	176.035	173.422	176.014
199	ENSG00000011451	protein_coding	WIZ zinc finger [Source:HGNC Symbol;Acc:HGNC:30917]	WIZ	118.151	121.065	119.378	128.094	118.449	121.74	117.127	129.543	128.791	118.868	113.783	127.134	113.886	126.369	114.353	116.04	116.804	121.123
200	ENSG00000011454	protein_coding	RAB GTPase activating protein 1 [Source:HGNC Symbol;Acc:HGNC:17155]	RABGAP1	88.4051	84.3302	86.202	82.5854	85.0661	80.9412	88.9058	79.1689	83.6599	88.6852	81.8	83.1602	79.7093	82.2485	84.9047	81.5998	81.5078	79.3978
201	ENSG00000011478	protein_coding	glutaminyl-peptide cyclotransferase like [Source:HGNC Symbol;Acc:HGNC:25952]	QPCTL	8.52638	6.48256	6.57902	8.72056	7.54115	7.59667	7.26418	7.01326	7.22411	7.18209	5.90033	8.20556	6.70245	6.15502	5.45969	5.22703	5.09689	6.24769
202	ENSG00000011485	protein_coding	protein phosphatase 5 catalytic subunit [Source:HGNC Symbol;Acc:HGNC:9322]	PPP5C	105.907	109.464	111.9	117.468	109.227	114.066	110.827	115.651	109.138	109.686	112.173	109.723	103.805	99.2973	104.809	107.212	101.81	102.306
203	ENSG00000011523	protein_coding	centrosomal protein 68 [Source:HGNC Symbol;Acc:HGNC:29076]	CEP68	78.4683	78.928	79.2294	80.5641	80.8392	84.5274	79.906	76.9436	77.5233	77.6393	79.051	80.4776	101.201	99.6241	100.768	96.7001	100.961	99.6284
204	ENSG00000011566	protein_coding	mitogen-activated protein kinase kinase kinase kinase 3 [Source:HGNC Symbol;Acc:HGNC:6865]	MAP4K3	83.597	85.24	81.3662	81.6614	85.3063	74.9255	84.5345	77.9551	81.7956	80.1394	82.2023	81.3192	85.2486	85.0809	80.3908	82.529	80.7008	80.9969
205	ENSG00000011638	protein_coding	transmembrane protein 159 [Source:HGNC Symbol;Acc:HGNC:30136]	TMEM159	2.94897	4.15111	3.43009	3.46512	3.2182	3.85618	4.11423	3.77637	3.88393	4.45471	3.41951	4.05018	3.71128	3.37709	3.56815	3.13622	2.50597	3.57011
206	ENSG00000011677	protein_coding	gamma-aminobutyric acid type A receptor subunit alpha3 [Source:HGNC Symbol;Acc:HGNC:4077]	GABRA3	8.84692	7.2218	7.36625	8.37405	7.87738	8.29078	7.39275	7.48531	8.62233	8.40941	8.51525	7.46916	7.03481	8.11591	6.44846	7.434	6.8808	6.95428
207	ENSG00000012048	protein_coding	BRCA1 DNA repair associated [Source:HGNC Symbol;Acc:HGNC:1100]	BRCA1	195.978	199.879	191.916	175.855	193.428	179.736	188.547	180.524	182.545	190.962	189.012	193.304	153.935	164.933	167.316	155.533	151.845	157.42
208	ENSG00000012061	protein_coding	ERCC excision repair 1, endonuclease non-catalytic subunit [Source:HGNC Symbol;Acc:HGNC:3433]	ERCC1	81.0967	83.7047	79.7917	85.5308	80.9353	83.0235	76.5632	84.6312	81.5626	78.9121	80.5261	80.8984	80.8726	78.9259	78.8002	85.7814	81.5502	84.0092
209	ENSG00000012174	protein_coding	membrane bound transcription factor peptidase, site 2 [Source:HGNC Symbol;Acc:HGNC:15455]	MBTPS2	93.0209	94.4521	89.5197	91.3638	89.7733	91.8542	98.6128	96.1626	97.176	98.9128	99.2328	94.3639	98.3211	96.1926	94.7494	96.1193	95.5242	97.8805
210	ENSG00000012232	protein_coding	exostosin like glycosyltransferase 3 [Source:HGNC Symbol;Acc:HGNC:3518]	EXTL3	99.1752	95.6462	91.2628	94.9444	88.7646	98.6025	94.5629	97.0393	101.914	91.5944	90.9858	96.8887	90.1231	90.5823	85.4636	82.1225	85.8826	86.7239
211	ENSG00000012660	protein_coding	ELOVL fatty acid elongase 5 [Source:HGNC Symbol;Acc:HGNC:21308]	ELOVL5	183.413	178.327	177.69	178.743	178.73	186.408	186.169	179.58	181.768	180.643	188.945	177.314	168.226	163.353	158.589	152.687	153.501	162.031
212	ENSG00000012822	protein_coding	calcium binding and coiled-coil domain 1 [Source:HGNC Symbol;Acc:HGNC:29306]	CALCOCO1	32.5669	31.1618	34.6383	30.6663	31.0772	34.4742	35.3566	32.7061	32.9357	33.774	35.6031	35.084	46.474	46.6256	49.5242	48.9599	50.1194	47.5271
213	ENSG00000012963	protein_coding	ubiquitin protein ligase E3 component n-recognin 7 [Source:HGNC Symbol;Acc:HGNC:20344]	UBR7	115.266	111.455	111.225	109.844	112.013	110.364	116.998	110.324	111.003	116.55	116.062	114.457	97.1579	91.8351	94.7064	96.8163	92.0838	97.8061
214	ENSG00000012983	protein_coding	mitogen-activated protein kinase kinase kinase kinase 5 [Source:HGNC Symbol;Acc:HGNC:6867]	MAP4K5	107.253	100.935	107.401	98.9293	108.026	99.5665	100.413	98.0508	95.7001	104.322	104.932	103.095	113.831	113.786	117.233	108.838	110.9	120.194
215	ENSG00000013016	protein_coding	EH domain containing 3 [Source:HGNC Symbol;Acc:HGNC:3244]	EHD3	25.5791	24.6224	24.4605	24.5446	23.2959	24.7567	25.9068	26.2323	24.5465	24.5918	24.6071	24.7745	22.8216	22.4958	22.7846	20.3274	21.6193	23.2801
216	ENSG00000013275	protein_coding	proteasome 26S subunit, ATPase 4 [Source:HGNC Symbol;Acc:HGNC:9551]	PSMC4	124.69	127.945	125.901	133.869	128.824	134.773	125.934	130.42	133.607	126.55	130.344	129.501	114.828	112.697	106.228	113.891	111.622	113.053
217	ENSG00000013288	protein_coding	mannosidase alpha class 2B member 2 [Source:HGNC Symbol;Acc:HGNC:29623]	MAN2B2	20.6428	21.7223	21.9301	24.0826	20.462	22.5201	23.8497	23.1303	23.5366	20.6371	20.45	22.8283	18.5564	17.2667	18.9585	19.5723	19.0284	19.3381
218	ENSG00000013293	protein_coding	solute carrier family 7 member 14 [Source:HGNC Symbol;Acc:HGNC:29326]	SLC7A14	85.2638	77.7339	78.4984	85.242	79.6864	81.481	74.956	74.3136	77.9894	81.3667	78.5817	79.5308	71.6775	68.1954	66.806	63.1309	68.9779	66.8652
219	ENSG00000013306	protein_coding	solute carrier family 25 member 39 [Source:HGNC Symbol;Acc:HGNC:24279]	SLC25A39	82.3148	82.3968	80.6914	94.3091	76.084	85.53	76.756	86.3845	79.0769	81.6849	79.2522	91.3657	79.0446	74.3504	74.5872	77.2439	79.469	79.3234
220	ENSG00000013374	protein_coding	negative regulator of ubiquitin like proteins 1 [Source:HGNC Symbol;Acc:HGNC:17623]	NUB1	105.394	106.621	103.352	99.7956	101.541	104.657	103.627	102.367	99.5063	101.686	101.781	98.7823	112.778	111.553	109.968	115.343	110.772	107.996
221	ENSG00000013375	protein_coding	phosphoglucomutase 3 [Source:HGNC Symbol;Acc:HGNC:8907]	PGM3	83.4687	83.6478	78.6671	80.6219	81.5597	75.504	78.4917	76.0669	75.5813	79.7757	79.4533	75.2176	76.3858	74.6773	76.0918	67.8353	74.9668	75.8648
222	ENSG00000013392	protein_coding	RWD domain containing 2A [Source:HGNC Symbol;Acc:HGNC:21385]	RWDD2A	10.1932	9.09833	10.3465	9.41359	8.59787	9.06202	9.77129	8.76658	9.94287	8.63669	7.64361	9.88875	11.0784	9.04189	10.1456	8.7698	10.661	9.14841
223	ENSG00000013441	protein_coding	CDC like kinase 1 [Source:HGNC Symbol;Acc:HGNC:2068]	CLK1	76.6733	80.7477	83.9528	74.9044	82.1841	83.7562	81.3202	75.46	77.834	80.0485	85.823	80.2146	75.4995	76.0935	77.9834	96.9905	93.1032	94.6823
224	ENSG00000013503	protein_coding	RNA polymerase III subunit B [Source:HGNC Symbol;Acc:HGNC:30348]	POLR3B	22.6943	20.9262	19.962	23.3318	24.2566	23.2528	23.7854	23.3326	24.4688	19.228	22.5956	22.9335	21.2152	21.6243	20.6351	19.8627	20.0478	19.0778
225	ENSG00000013523	protein_coding	angel homolog 1 [Source:HGNC Symbol;Acc:HGNC:19961]	ANGEL1	25.9638	24.2243	26.541	24.3136	25.6015	24.7567	24.0425	25.5579	28.1197	24.5918	26.0151	24.6167	25.2034	24.729	24.5901	22.1278	24.1678	24.8792
226	ENSG00000013561	protein_coding	ring finger protein 14 [Source:HGNC Symbol;Acc:HGNC:10058]	RNF14	40.5163	41.6249	38.8556	37.1923	40.7799	38.7546	41.9137	40.1914	42.0241	39.5469	41.9058	38.1348	40.0485	40.5251	35.2086	34.905	35.2535	36.1846
227	ENSG00000013563	protein_coding	deoxyribonuclease 1 like 1 [Source:HGNC Symbol;Acc:HGNC:2957]	DNASE1L1	9.61622	10.5768	11.7523	11.3194	10.4231	10.5274	10.607	10.4525	9.94287	11.3186	9.31984	12.2031	9.80441	10.2402	9.45774	11.4995	10.1513	10.8219
228	ENSG00000013573	protein_coding	DEAD/H-box helicase 11 [Source:HGNC Symbol;Acc:HGNC:2736]	DDX11	49.9402	49.529	62.079	57.6366	54.7574	54.912	50.5278	56.241	50.4134	57.0476	51.829	57.3863	50.9608	49.458	54.511	53.3738	46.8489	52.436
229	ENSG00000013583	protein_coding	heme binding protein 1 [Source:HGNC Symbol;Acc:HGNC:17176]	HEBP1	6.3467	6.65316	5.79179	6.23722	5.09148	5.36009	5.46421	5.66456	6.13661	6.04568	6.30263	4.83917	6.14853	5.71926	6.66341	5.92397	6.32864	5.76424
230	ENSG00000013810	protein_coding	transforming acidic coiled-coil containing protein 3 [Source:HGNC Symbol;Acc:HGNC:11524]	TACC3	175.015	171.39	171.673	169.791	167.683	163.965	168.619	167.509	172.602	171.552	161.454	169.792	184.124	188.954	184.555	189.161	184.295	186.018
231	ENSG00000014123	protein_coding	UFM1 specific ligase 1 [Source:HGNC Symbol;Acc:HGNC:23039]	UFL1	27.6306	30.5931	29.9149	25.6419	26.7543	25.1808	27.8996	25.6254	26.0223	27.6374	30.1051	27.0889	27.1976	29.0865	30.1358	25.3801	29.8168	30.3831
232	ENSG00000014138	protein_coding	DNA polymerase alpha 2, accessory subunit [Source:HGNC Symbol;Acc:HGNC:30073]	POLA2	14.4243	15.5809	14.3389	16.2283	14.2177	15.579	13.1141	17.8703	15.7688	14.7733	14.7508	15.0435	10.9676	10.8394	12.639	13.8226	12.4024	10.9707
233	ENSG00000014164	protein_coding	zinc finger CCCH-type containing 3 [Source:HGNC Symbol;Acc:HGNC:28972]	ZC3H3	16.1552	16.6045	18.7811	16.8058	17.6761	18.0855	17.9997	17.4657	18.0214	17.8643	16.36	17.8313	15.7868	18.8463	16.551	17.1911	17.6267	15.4333
234	ENSG00000014216	protein_coding	calpain 1 [Source:HGNC Symbol;Acc:HGNC:1476]	CAPN1	57.3768	58.2862	54.4878	61.1594	53.2684	60.6577	54.6421	58.8035	58.0259	55.3657	51.1585	56.2291	57.1093	59.6982	53.3502	53.6061	60.1008	56.0433
235	ENSG00000014641	protein_coding	malate dehydrogenase 1 [Source:HGNC Symbol;Acc:HGNC:6970]	MDH1	106.291	102.925	106.558	110.768	110.62	110.749	110.441	108.301	114.809	103.958	110.765	105.936	105.467	111.063	111.386	105.528	111.24	111.417
236	ENSG00000014824	protein_coding	solute carrier family 30 member 9 [Source:HGNC Symbol;Acc:HGNC:1329]	SLC30A9	191.363	195.33	196.134	184.345	191.507	188.529	196.583	184.57	187.905	198.598	203.83	186.729	202.126	210.033	206.48	205.19	206.679	207.029
237	ENSG00000014919	protein_coding	cytochrome c oxidase assembly homolog COX15 [Source:HGNC Symbol;Acc:HGNC:2263]	COX15	66.1596	70.8533	67.1397	65.6641	68.3027	64.1282	65.5705	68.177	67.9688	66.7752	64.032	65.3815	71.4005	69.6661	67.7088	68.2418	67.6187	70.6212
238	ENSG00000015133	protein_coding	coiled-coil domain containing 88C [Source:HGNC Symbol;Acc:HGNC:19967]	CCDC88C	31.0924	31.8442	33.7386	31.4171	30.9331	33.2017	30.4067	34.3245	34.1786	33.7285	31.9825	33.3482	35.8941	36.3309	36.6702	40.5385	36.6976	36.1846
239	ENSG00000015153	protein_coding	YY1 associated factor 2 [Source:HGNC Symbol;Acc:HGNC:17363]	YAF2	32.9516	32.5834	31.6018	32.2834	30.789	31.3122	33.1067	36.3476	31.5375	31.9558	30.2392	29.7714	31.8505	32.4636	32.1563	33.9757	30.7512	32.3913
240	ENSG00000015171	protein_coding	zinc finger MYND-type containing 11 [Source:HGNC Symbol;Acc:HGNC:16966]	ZMYND11	124.306	122.827	123.483	117.468	124.069	116.804	125.484	127.385	114.731	123.505	122.231	115.246	116.434	114.113	120.887	115.634	114.085	114.69
241	ENSG00000015475	protein_coding	BH3 interacting domain death agonist [Source:HGNC Symbol;Acc:HGNC:1050]	BID	43.5294	45.776	44.31	44.4691	44.2382	47.1225	44.6136	40.1914	46.8402	45.6381	45.7946	46.4982	43.5936	40.5251	38.1749	45.0686	41.6246	41.7257
242	ENSG00000015479	protein_coding	matrin 3 [Source:HGNC Symbol;Acc:HGNC:6912]	MATR3	9.10335	11.2023	12.427	10.1066	10.6633	8.98489	11.507	9.50836	11.7295	15.1369	12.0689	11.1511	7.42255	10.0768	10.6185	20.9662	11.4255	11.2682
243	ENSG00000015532	protein_coding	xylosyltransferase 2 [Source:HGNC Symbol;Acc:HGNC:15517]	XYLT2	25.3868	26.3852	26.3161	27.49	23.8723	26.2991	24.8139	28.3902	23.692	23.6827	23.2661	28.5616	23.7632	27.7248	26.4817	27.2386	26.6737	26.7014
244	ENSG00000015592	protein_coding	stathmin 4 [Source:HGNC Symbol;Acc:HGNC:16078]	STMN4	26.3484	25.9302	27.3282	29.5113	30.5489	33.3174	27.1925	26.03	25.4786	28.3193	29.7698	30.8234	40.2147	39.2178	40.5823	41.2936	42.3042	39.9406
245	ENSG00000015676	protein_coding	NudC domain containing 3 [Source:HGNC Symbol;Acc:HGNC:22208]	NUDCD3	171.425	169.627	158.009	173.66	163.84	173.22	166.755	168.453	168.33	167.325	165.544	175.367	168.78	161.065	154.333	157.45	159.49	164.82
246	ENSG00000016082	protein_coding	ISL LIM homeobox 1 [Source:HGNC Symbol;Acc:HGNC:6132]	ISL1	291.948	297.231	294.369	284.256	290.839	296.694	295.774	299.547	296.81	290.011	302.325	289.246	317.231	319.789	316.791	316.41	316.092	310.711
247	ENSG00000016402	protein_coding	interleukin 20 receptor subunit alpha [Source:HGNC Symbol;Acc:HGNC:6003]	IL20RA	10.065	12.4533	12.7644	10.5109	11.9121	11.9156	10.5427	9.30606	13.2054	12.5914	13.0075	13.1499	15.1775	16.6131	15.3903	14.113	15.1632	14.392
248	ENSG00000016864	protein_coding	glycosyltransferase 8 domain containing 1 [Source:HGNC Symbol;Acc:HGNC:24870]	GLT8D1	49.4273	49.3585	49.2583	50.4753	54.181	55.6832	54.5778	50.8461	50.1027	54.3202	47.1356	50.7587	51.7917	47.8784	50.8139	49.3664	51.5635	54.5557
249	ENSG00000017260	protein_coding	ATPase secretory pathway Ca2+ transporting 1 [Source:HGNC Symbol;Acc:HGNC:13211]	ATP2C1	143.346	141.138	140.465	138.085	140.016	135.93	137.634	138.782	137.647	137.232	147.508	139.494	138.425	141.184	134.343	131.431	140.887	135.739
250	ENSG00000017797	protein_coding	ralA binding protein 1 [Source:HGNC Symbol;Acc:HGNC:9841]	RALBP1	93.7902	90.0735	88.4513	85.7041	89.1009	92.9339	90.8344	92.0491	93.059	91.0489	94.3382	87.6837	96.327	91.1814	89.8485	89.7888	90.5548	88.2487
251	ENSG00000018189	protein_coding	RUN and FYVE domain containing 3 [Source:HGNC Symbol;Acc:HGNC:30285]	RUFY3	216.685	214.493	213.902	206.348	222.68	203.066	217.668	210.668	207.635	222.463	218.446	217.132	214.866	212.92	207.167	206.7	206.382	211.901
252	ENSG00000018236	protein_coding	contactin 1 [Source:HGNC Symbol;Acc:HGNC:2171]	CNTN1	221.429	219.497	231.39	223.558	234.832	238.89	234.511	214.039	212.451	227.009	244.193	244.115	359.772	363.255	371.474	352.418	389.02	368.279
253	ENSG00000018510	protein_coding	alkylglycerone phosphate synthase [Source:HGNC Symbol;Acc:HGNC:327]	AGPS	156.937	152.056	155.254	152.465	158.893	153.013	154.283	149.976	149.842	160.461	164.807	151.224	144.961	145.651	147.928	144.905	141.694	147.49
254	ENSG00000018610	protein_coding	STING1 ER exit protein 1 [Source:HGNC Symbol;Acc:HGNC:26239]	CXorf56	29.1051	30.5931	30.7021	27.5477	28.7717	28.7671	28.7353	31.1551	31.6929	28.6829	30.038	27.6149	31.5735	33.662	30.0928	32.0011	30.1141	29.7137
255	ENSG00000018699	protein_coding	tetratricopeptide repeat domain 27 [Source:HGNC Symbol;Acc:HGNC:25986]	TTC27	34.1055	33.0952	34.1884	36.2105	35.4963	34.8598	33.8781	34.392	34.9554	35.4104	34.6644	33.9794	30.5765	31.7555	30.0498	31.6526	33.2147	33.1351
256	ENSG00000018869	protein_coding	zinc finger protein 582 [Source:HGNC Symbol;Acc:HGNC:26421]	ZNF582	5.38508	6.65316	6.24163	6.69924	7.44509	6.63263	6.10705	7.283	7.45715	7.36391	7.30836	7.88996	8.25343	6.5363	6.62042	6.85322	7.34802	6.32207
257	ENSG00000019144	protein_coding	pleckstrin homology like domain family B member 1 [Source:HGNC Symbol;Acc:HGNC:23697]	PHLDB1	66.416	70.7395	73.4938	70.342	67.1499	71.3007	67.3062	70.4698	70.5322	71.0027	65.7753	72.0616	75.4441	78.8169	81.5515	81.4256	72.7156	75.0467
258	ENSG00000019485	protein_coding	PR/SET domain 11 [Source:HGNC Symbol;Acc:HGNC:13996]	PRDM11	37.952	35.3129	33.4574	36.9036	34.5356	32.8546	34.7138	37.2242	34.8777	34.4558	31.9154	32.0858	30.5765	29.6857	29.6199	30.2587	32.3228	33.9532
259	ENSG00000019549	protein_coding	snail family transcriptional repressor 2 [Source:HGNC Symbol;Acc:HGNC:11094]	SNAI2	11.283	10.3494	9.72795	9.64459	11.5759	9.79469	8.61416	9.77811	12.7393	10.2731	9.92328	10.3095	7.0902	6.80865	6.19052	9.11827	6.07379	7.47492
260	ENSG00000019995	protein_coding	zinc finger RANBP2-type containing 1 [Source:HGNC Symbol;Acc:HGNC:18224]	ZRANB1	69.4932	69.2042	68.3768	66.1261	67.1018	70.4524	64.8633	68.3793	69.134	69.139	68.9266	65.3815	75.4995	71.7904	70.2022	74.0496	69.1478	71.1791
261	ENSG00000020129	protein_coding	neurochondrin [Source:HGNC Symbol;Acc:HGNC:17597]	NCDN	52.1199	55.3861	50.2705	55.9617	50.7227	52.4826	50.1421	52.3297	54.2974	51.7747	51.0915	55.8609	45.7539	45.3728	46.4289	46.4044	47.6984	48.8659
262	ENSG00000020181	protein_coding	adhesion G protein-coupled receptor A2 [Source:HGNC Symbol;Acc:HGNC:17849]	ADGRA2	70.3907	72.7867	68.8829	75.7129	65.805	71.4935	65.7633	73.1672	68.9786	69.4117	64.7695	68.2744	64.3103	63.1298	60.3146	60.4593	62.4369	62.6257
263	ENSG00000020256	protein_coding	ZFP64 zinc finger protein [Source:HGNC Symbol;Acc:HGNC:15940]	ZFP64	33.7209	29.399	29.9711	29.7423	32.134	33.2017	31.821	31.2225	32.9357	31.0466	33.8599	33.6112	32.2936	33.2262	32.1133	32.9884	33.1723	34.3623
264	ENSG00000020426	protein_coding	MNAT1 component of CDK activating kinase [Source:HGNC Symbol;Acc:HGNC:7181]	MNAT1	12.7575	13.8181	12.8769	11.7814	12.1523	12.5711	13.6927	13.5545	12.8947	12.2277	14.952	11.5193	13.0726	13.7262	12.3381	13.0676	14.3562	13.2763
265	ENSG00000020577	protein_coding	sterile alpha motif domain containing 4A [Source:HGNC Symbol;Acc:HGNC:23023]	SAMD4A	12.6934	14.9554	13.6641	12.7055	12.7287	13.5352	12.9212	13.4196	13.9822	13.5005	13.4098	11.9401	19.8304	18.3561	22.0107	21.9535	25.5269	22.0529
266	ENSG00000020922	protein_coding	MRE11 homolog, double strand break repair nuclease [Source:HGNC Symbol;Acc:HGNC:7230]	MRE11	110.394	111.568	116.342	111.808	115.231	107.626	118.091	102.569	106.497	113.095	116.8	111.248	106.575	105.888	110.527	106.515	108.819	111.678
267	ENSG00000021355	protein_coding	serpin family B member 1 [Source:HGNC Symbol;Acc:HGNC:3311]	SERPINB1	5.00043	5.34527	4.94832	5.5442	4.65918	5.28296	4.75707	5.46225	4.50536	6.09114	5.22984	5.10217	6.92402	6.5363	6.53444	6.56283	6.20122	6.28488
268	ENSG00000021574	protein_coding	spastin [Source:HGNC Symbol;Acc:HGNC:11233]	SPAST	116.356	123.453	121.346	118.276	125.51	118.577	120.148	115.247	121.101	120.186	124.376	111.985	121.918	122.828	117.319	108.722	120.924	120.305
269	ENSG00000021762	protein_coding	oxysterol binding protein like 5 [Source:HGNC Symbol;Acc:HGNC:16392]	OSBPL5	3.26951	4.43544	4.38601	4.56241	3.26623	4.62741	4.17851	3.30433	3.6509	3.86378	3.62066	4.26058	3.93284	4.13966	4.21299	4.76241	4.5872	4.09075
270	ENSG00000021776	protein_coding	aquarius intron-binding spliceosomal factor [Source:HGNC Symbol;Acc:HGNC:29513]	AQR	138.345	144.948	139.284	142.359	144.435	144.298	136.862	141.277	140.909	135.869	140.468	139.021	141.416	137.589	141.78	137.006	137.574	139.309
271	ENSG00000022267	protein_coding	four and a half LIM domains 1 [Source:HGNC Symbol;Acc:HGNC:3702]	FHL1	106.355	107.076	107.345	114.58	111.244	110.865	104.334	107.02	110.847	105.14	105.938	110.985	111.892	115.366	105.712	106.515	111.24	111.008
272	ENSG00000022277	protein_coding	replication termination factor 2 [Source:HGNC Symbol;Acc:HGNC:15890]	RTF2	51.607	47.7094	48.7522	51.9191	52.0195	51.9813	55.4778	47.8116	49.792	54.5475	53.7064	51.3373	50.85	49.4036	50.4699	51.8057	52.3281	53.0682
273	ENSG00000022567	protein_coding	solute carrier family 45 member 4 [Source:HGNC Symbol;Acc:HGNC:29196]	SLC45A4	28.2076	27.3519	29.5775	29.1648	26.7543	25.9906	25.8425	29.5366	30.8384	26.7283	26.7526	27.6675	22.1015	22.6047	21.2799	23.1732	22.0865	22.0529
274	ENSG00000022840	protein_coding	ring finger protein 10 [Source:HGNC Symbol;Acc:HGNC:10055]	RNF10	96.0339	94.9638	94.6367	102.51	97.6507	96.7515	95.1415	102.164	98.8072	96.5946	95.8133	94.6795	99.0966	98.1535	98.6614	96.1774	98.7947	96.0583
275	ENSG00000022976	protein_coding	zinc finger protein 839 [Source:HGNC Symbol;Acc:HGNC:20345]	ZNF839	21.2839	20.4712	19.0623	20.3287	20.2698	20.6691	19.864	19.5562	21.2839	17.5916	19.5784	20.7243	22.2677	23.4218	22.6556	22.0116	22.6812	22.6107
276	ENSG00000023041	protein_coding	zinc finger DHHC-type palmitoyltransferase 6 [Source:HGNC Symbol;Acc:HGNC:19160]	ZDHHC6	52.8892	52.0311	52.1261	49.2625	56.5346	50.3231	52.6492	48.1487	49.7143	50.1383	56.2543	49.7067	47.9142	47.2793	47.2457	43.3844	42.6015	46.1511
277	ENSG00000023171	protein_coding	GRAM domain containing 1B [Source:HGNC Symbol;Acc:HGNC:29214]	GRAMD1B	23.7841	21.1536	23.5608	21.195	20.7502	22.4815	18.4497	22.2536	21.9054	22.0008	21.9251	22.2497	21.7137	21.243	23.4294	23.4636	22.3414	23.6892
278	ENSG00000023191	protein_coding	ribonuclease/angiogenin inhibitor 1 [Source:HGNC Symbol;Acc:HGNC:10074]	RNH1	33.6568	32.2991	31.8829	39.7334	32.5182	35.2455	31.6924	33.1781	35.4991	35.4559	34.8656	37.0828	23.874	27.6159	25.235	26.4256	26.6737	25.9577
279	ENSG00000023228	protein_coding	NADH:ubiquinone oxidoreductase core subunit S1 [Source:HGNC Symbol;Acc:HGNC:7707]	NDUFS1	145.077	141.195	134.167	142.821	139.968	143.99	142.584	143.367	142.463	140.369	139.127	143.545	144.629	138.297	135.375	144.208	135.832	137.077
280	ENSG00000023287	protein_coding	RB1 inducible coiled-coil 1 [Source:HGNC Symbol;Acc:HGNC:15574]	RB1CC1	103.663	111.909	108.02	111.808	117.392	104.117	102.856	97.309	97.8751	104.777	110.095	106.041	120.312	126.096	135.375	113.485	133.454	126.516
281	ENSG00000023318	protein_coding	endoplasmic reticulum protein 44 [Source:HGNC Symbol;Acc:HGNC:18311]	ERP44	58.2102	59.0254	61.4042	54.5179	56.6787	55.3362	63.2562	58.4663	57.5599	58.7295	60.4784	56.4395	50.2407	48.9678	52.6624	47.9145	50.1619	47.3411
282	ENSG00000023330	protein_coding	5'-aminolevulinate synthase 1 [Source:HGNC Symbol;Acc:HGNC:396]	ALAS1	20.2582	21.2674	21.3678	22.6388	20.7502	22.79	24.8139	24.8162	25.7116	23.7736	20.383	20.8295	23.0431	24.0209	20.5491	19.5143	23.2333	22.6851
283	ENSG00000023516	protein_coding	A-kinase anchoring protein 11 [Source:HGNC Symbol;Acc:HGNC:369]	AKAP11	181.811	183.957	176.34	178.165	179.162	172.178	170.226	165.351	169.806	184.462	178.284	180.627	167.063	184.814	180.858	165.581	175.715	172.407
284	ENSG00000023572	protein_coding	glutaredoxin 2 [Source:HGNC Symbol;Acc:HGNC:16065]	GLRX2	24.8098	23.6557	22.9985	20.3287	21.7589	22.7129	24.0425	21.9839	23.692	24.1827	23.9366	22.6705	18.0025	16.9944	17.7548	16.0876	17.4993	16.2514
285	ENSG00000023608	protein_coding	small nuclear RNA activating complex polypeptide 1 [Source:HGNC Symbol;Acc:HGNC:11134]	SNAPC1	12.1805	12.9083	13.3267	11.2617	12.7767	10.8359	14.0784	13.9591	12.6616	12.1368	12.8734	12.1505	15.9529	15.7961	16.2071	15.2165	14.4412	15.3217
286	ENSG00000023697	protein_coding	deoxyribose-phosphate aldolase [Source:HGNC Symbol;Acc:HGNC:24269]	DERA	43.7858	42.3641	43.2416	40.2532	45.0548	45.0016	41.3351	42.4167	44.9759	43.638	44.1184	41.0278	40.8794	38.9455	36.1973	40.887	38.9487	42.2835
287	ENSG00000023734	protein_coding	serine/threonine kinase receptor associated protein [Source:HGNC Symbol;Acc:HGNC:30796]	STRAP	222.583	213.072	208.954	201.67	220.038	208.619	216.254	216.265	209.033	212.872	215.563	211.03	210.823	203.878	204.115	208.326	204.385	205.579
288	ENSG00000023902	protein_coding	pleckstrin homology domain containing O1 [Source:HGNC Symbol;Acc:HGNC:24310]	PLEKHO1	80.5839	78.0751	79.9604	88.1296	77.525	82.2523	79.3917	83.3499	81.951	81.3213	75.2292	80.5302	82.9775	85.0264	79.66	83.981	76.8356	80.625
289	ENSG00000023909	protein_coding	glutamate-cysteine ligase modifier subunit [Source:HGNC Symbol;Acc:HGNC:4312]	GCLM	20.9633	20.4144	23.1109	20.04	20.3659	19.8979	22.4997	23.0628	23.7697	23.5918	23.199	22.0919	18.3902	20.1536	20.1192	18.9916	18.3913	19.2265
290	ENSG00000024048	protein_coding	ubiquitin protein ligase E3 component n-recognin 2 [Source:HGNC Symbol;Acc:HGNC:21289]	UBR2	76.0322	75.6868	82.3783	82.0079	75.0753	77.8948	82.3488	80.3153	75.5813	80.6849	79.7886	77.795	80.928	80.8323	79.0151	72.7138	75.7738	76.3483
291	ENSG00000024526	protein_coding	DEP domain containing 1 [Source:HGNC Symbol;Acc:HGNC:22949]	DEPDC1	80.5198	77.0515	74.6185	73.1141	77.2848	71.9177	74.7632	69.728	71.6974	73.4119	78.3135	73.9552	93.4466	94.9943	97.1138	88.8015	94.6323	97.7689
292	ENSG00000024862	protein_coding	coiled-coil domain containing 28A [Source:HGNC Symbol;Acc:HGNC:21098]	CCDC28A	10.1932	9.04147	10.0091	9.06707	8.88607	9.60188	9.51415	8.90145	8.70001	9.13671	9.05164	9.20495	11.7431	11.6564	11.4353	10.5121	10.7459	11.1194
293	ENSG00000025039	protein_coding	Ras related GTP binding D [Source:HGNC Symbol;Acc:HGNC:19903]	RRAGD	19.3606	20.983	18.1626	19.4624	17.9643	19.2038	18.3212	17.4657	16.7009	18.3643	18.0362	18.7781	19.498	18.1382	18.1417	18.3527	16.5224	15.9167
294	ENSG00000025156	protein_coding	heat shock transcription factor 2 [Source:HGNC Symbol;Acc:HGNC:5225]	HSF2	50.6454	53.3958	52.7446	54.8645	59.3205	55.1048	55.992	58.3315	57.3268	53.6384	55.6508	55.9661	53.5088	54.0334	53.7372	57.207	55.6411	56.0061
295	ENSG00000025293	protein_coding	PHD finger protein 20 [Source:HGNC Symbol;Acc:HGNC:16098]	PHF20	95.6493	98.0914	98.2354	93.4428	95.3451	96.7129	96.6843	99.3995	96.0108	95.0945	93.0643	97.5199	96.1608	101.857	92.2989	89.905	92.2537	92.9716
296	ENSG00000025423	protein_coding	hydroxysteroid 17-beta dehydrogenase 6 [Source:HGNC Symbol;Acc:HGNC:23316]	HSD17B6	1.73092	2.61577	2.64285	2.82985	3.41033	2.19802	2.57139	2.36023	1.94197	2.22736	3.15131	1.36759	3.04657	2.01536	2.9233	2.03274	2.71834	2.34288
297	ENSG00000025434	protein_coding	nuclear receptor subfamily 1 group H member 3 [Source:HGNC Symbol;Acc:HGNC:7966]	NR1H3	2.82076	3.41187	2.64285	3.11861	2.54574	2.77645	4.11423	3.50663	4.03929	3.22739	2.41377	3.41898	3.15735	3.10474	3.56815	2.49736	2.25113	2.64039
298	ENSG00000025708	protein_coding	thymidine phosphorylase [Source:HGNC Symbol;Acc:HGNC:3148]	TYMP	1.47449	1.70594	1.79939	2.48334	2.11344	2.6222	2.24997	1.82075	1.39822	2.1819	1.87738	1.78839	2.99118	1.90642	3.09526	2.96199	3.4404	2.82634
299	ENSG00000025770	protein_coding	non-SMC condensin II complex subunit H2 [Source:HGNC Symbol;Acc:HGNC:25071]	NCAPH2	61.7361	65.0531	58.6489	70.804	63.5474	66.7504	61.0063	61.7707	62.7643	64.3661	59.6738	67.275	54.2289	52.8351	47.5466	53.7223	53.8996	57.2705
300	ENSG00000025772	protein_coding	translocase of outer mitochondrial membrane 34 [Source:HGNC Symbol;Acc:HGNC:15746]	TOMM34	35.0671	31.2187	32.3328	32.2256	32.5182	33.8187	32.6567	36.2801	33.7902	34.5922	32.9882	34.8736	29.0809	29.3044	28.1583	31.3041	29.3071	30.0484
301	ENSG00000025796	protein_coding	SEC63 homolog, protein translocation regulator [Source:HGNC Symbol;Acc:HGNC:21082]	SEC63	172.835	174.517	175.384	163.9	168.355	156.175	173.376	171.96	156.911	173.734	170.238	167.004	163.352	162.917	171.615	175.686	173.039	167.795
302	ENSG00000025800	protein_coding	karyopherin subunit alpha 6 [Source:HGNC Symbol;Acc:HGNC:6399]	KPNA6	110.907	117.823	109.313	114.696	116.432	109.978	110.056	117.944	103.157	114.05	108.217	113.931	109.676	111.498	107.13	112.614	104.953	103.347
303	ENSG00000026025	protein_coding	vimentin [Source:HGNC Symbol;Acc:HGNC:12692]	VIM	164.63	164.737	153.904	167.192	153.033	163.618	152.998	163.463	163.669	157.415	160.315	165.268	147.177	146.304	136.191	148.622	147.555	144.813
304	ENSG00000026036	protein_coding	RTEL1-TNFRSF6B readthrough (NMD candidate) [Source:HGNC Symbol;Acc:HGNC:44095]	RTEL1-TNFRSF6B	3.33362	3.41187	5.00455	5.60195	4.37099	5.12872	3.02138	3.30433	3.6509	4.59108	3.88885	4.73397	2.60343	2.66899	3.7831	4.2397	4.24741	4.46264
305	ENSG00000026297	protein_coding	ribonuclease T2 [Source:HGNC Symbol;Acc:HGNC:21686]	RNASET2	7.75708	8.70028	9.22187	7.56552	7.06082	8.13654	7.84274	7.35044	8.85537	8.50032	7.91181	7.67956	7.69951	8.27932	8.64093	9.52482	8.62224	9.03684
306	ENSG00000026559	protein_coding	potassium voltage-gated channel modifier subfamily G member 1 [Source:HGNC Symbol;Acc:HGNC:6248]	KCNG1	10.8984	12.5671	10.965	11.6659	12.9208	10.5274	10.0284	12.2732	10.7197	10.2731	10.9961	12.8869	9.80441	10.6215	10.4035	9.64097	10.4911	10.8591
307	ENSG00000026652	protein_coding	1-acylglycerol-3-phosphate O-acyltransferase 4 [Source:HGNC Symbol;Acc:HGNC:20885]	AGPAT4	45.0039	47.2545	45.1534	42.7365	44.1422	49.1663	43.4565	43.1585	41.7911	45.1835	44.1184	47.7605	54.3397	54.5237	58.0791	53.0834	56.1083	50.9484
308	ENSG00000026950	protein_coding	butyrophilin subfamily 3 member A1 [Source:HGNC Symbol;Acc:HGNC:1138]	BTN3A1	18.5272	19.0496	21.0866	20.0977	19.7895	19.4351	20.6997	21.849	19.7304	20.228	17.3657	20.8821	20.9382	21.4609	22.8705	22.7666	22.6387	23.2057
309	ENSG00000027001	protein_coding	mitochondrial intermediate peptidase [Source:HGNC Symbol;Acc:HGNC:7104]	MIPEP	11.9241	11.0886	12.1459	10.7996	11.8641	12.6483	12.7284	12.6778	10.9527	11.8641	12.6053	10.7829	10.0814	8.93295	8.21104	8.53749	10.4911	9.40873
310	ENSG00000027075	protein_coding	protein kinase C eta [Source:HGNC Symbol;Acc:HGNC:9403]	PRKCH	2.30789	2.33145	2.75532	2.54109	1.92131	2.04377	2.1214	2.15793	3.2625	1.95462	2.21262	1.99879	3.65588	3.43156	3.69712	3.77508	3.82267	3.53292
311	ENSG00000027644	protein_coding	insulin receptor related receptor [Source:HGNC Symbol;Acc:HGNC:6093]	INSRR	6.41081	5.97078	8.26595	7.73878	7.30099	7.71236	6.10705	7.01326	8.31161	7.77302	6.77197	7.20616	7.0902	8.76954	8.94186	9.06019	7.98513	9.14841
312	ENSG00000027697	protein_coding	interferon gamma receptor 1 [Source:HGNC Symbol;Acc:HGNC:5439]	IFNGR1	26.5408	26.6126	26.5972	29.6846	27.763	28.0344	28.8639	27.109	26.7991	27.1828	28.4289	25.3005	32.1829	32.4636	30.7806	32.3495	32.8325	31.0897
313	ENSG00000027847	protein_coding	beta-1,4-galactosyltransferase 7 [Source:HGNC Symbol;Acc:HGNC:930]	B4GALT7	10.1291	11.2023	10.965	12.2434	11.8641	12.1084	11.8284	11.1942	11.9625	11.2277	10.9961	10.3095	10.026	10.676	10.4895	12.0803	11.1282	10.4128
314	ENSG00000028203	protein_coding	vezatin, adherens junctions transmembrane protein [Source:HGNC Symbol;Acc:HGNC:18258]	VEZT	75.2629	75.5162	76.4741	75.2509	77.7651	77.4706	77.206	72.0208	70.1438	78.0484	78.8499	76.5852	91.8956	92.1619	89.6766	88.3369	93.4855	86.352
315	ENSG00000028310	protein_coding	bromodomain containing 9 [Source:HGNC Symbol;Acc:HGNC:25818]	BRD9	79.9428	79.0418	86.202	79.5246	79.8786	81.9052	79.456	80.4502	79.0769	80.594	77.0395	80.7406	83.3652	78.599	80.6057	89.4984	86.5197	83.972
316	ENSG00000028528	protein_coding	sorting nexin 1 [Source:HGNC Symbol;Acc:HGNC:11172]	SNX1	120.844	122.373	126.688	124.051	124.261	121.123	121.241	124.553	118.615	128.141	123.706	123.609	149.171	143.69	154.419	139.039	146.663	150.54
317	ENSG00000028839	protein_coding	TATA-box binding protein like 1 [Source:HGNC Symbol;Acc:HGNC:11589]	TBPL1	35.7082	32.754	35.0319	34.3625	35.4482	33.5102	34.6495	34.5943	33.4018	34.5013	35.8713	32.6118	34.8971	35.1871	31.5115	32.3495	35.5933	35.3292
318	ENSG00000029153	protein_coding	aryl hydrocarbon receptor nuclear translocator like 2 [Source:HGNC Symbol;Acc:HGNC:18984]	ARNTL2	6.66724	6.08451	7.0851	6.75699	7.15689	6.74831	6.81419	6.94583	7.14643	7.22755	7.50951	5.83857	5.87157	6.91759	5.71763	6.27244	6.49854	6.5452
319	ENSG00000029363	protein_coding	BCL2 associated transcription factor 1 [Source:HGNC Symbol;Acc:HGNC:16863]	BCLAF1	365.416	365.184	378.266	366.206	397.952	355.27	356.073	324.161	328.503	377.151	388.148	370.828	348.361	363.309	390.433	364.847	387.958	388.807
320	ENSG00000029364	protein_coding	solute carrier family 39 member 9 [Source:HGNC Symbol;Acc:HGNC:20182]	SLC39A9	153.411	156.093	155.872	161.128	155.482	161.034	157.691	162.923	166.854	158.097	161.387	159.798	154.378	155.782	147.627	150.016	158.683	154.668
321	ENSG00000029534	protein_coding	ankyrin 1 [Source:HGNC Symbol;Acc:HGNC:492]	ANK1	40.7728	38.213	40.655	42.3323	35.8805	37.6363	37.2852	42.8214	38.3732	38.956	39.4249	40.2914	38.9961	37.5837	37.53	38.2735	37.632	38.044
322	ENSG00000029639	protein_coding	transcription factor B1, mitochondrial [Source:HGNC Symbol;Acc:HGNC:17037]	TFB1M	21.2198	22.0066	22.0988	21.657	20.7021	20.4377	22.4997	22.2536	22.5268	22.0008	20.9864	23.3543	24.0402	23.5307	22.8705	22.1278	21.4069	22.2016
323	ENSG00000029725	protein_coding	rabaptin, RAB GTPase binding effector protein 1 [Source:HGNC Symbol;Acc:HGNC:17677]	RABEP1	125.395	114.639	119.435	109.902	118.689	105.081	117.384	112.617	107.507	114.095	109.76	114.141	101.312	96.9552	100.768	104.192	98.5824	102.083
324	ENSG00000029993	protein_coding	high mobility group box 3 [Source:HGNC Symbol;Acc:HGNC:5004]	HMGB3	157.321	159.107	157.784	151.426	156.971	155.095	166.048	158.068	153.959	160.052	158.773	149.436	158.699	163.026	156.483	164.535	163.143	161.362
325	ENSG00000030066	protein_coding	nucleoporin 160 [Source:HGNC Symbol;Acc:HGNC:18017]	NUP160	205.979	202.324	205.355	204.327	208.27	200.598	214.711	214.511	208.567	208.735	204.701	206.401	210.601	209.87	209.446	208.849	206.424	209.112
326	ENSG00000030110	protein_coding	BCL2 antagonist/killer 1 [Source:HGNC Symbol;Acc:HGNC:949]	BAK1	5.5133	6.02765	5.96048	5.60195	6.96476	5.47577	5.39992	7.0807	5.51518	6.22751	4.76049	4.52358	5.26226	3.75837	5.15877	4.87856	4.96947	4.35107
327	ENSG00000030582	protein_coding	granulin precursor [Source:HGNC Symbol;Acc:HGNC:4601]	GRN	40.2599	40.715	36.4939	43.7761	38.4743	42.148	38.5709	41.7424	40.6259	38.0469	39.0226	41.0278	41.7657	43.9566	43.9355	45.8237	46.9763	44.0685
328	ENSG00000031003	protein_coding	family with sequence similarity 13 member B [Source:HGNC Symbol;Acc:HGNC:1335]	FAM13B	81.6737	80.5771	86.0333	82.0657	81.8479	78.9745	85.3702	84.1591	82.9608	81.6849	79.8556	82.4764	93.0035	94.8853	89.1177	89.6146	88.3886	88.9552
329	ENSG00000031081	protein_coding	Rho GTPase activating protein 31 [Source:HGNC Symbol;Acc:HGNC:29216]	ARHGAP31	86.0331	89.0499	79.9604	88.1296	85.4504	88.2679	87.9416	93.128	81.4072	80.9576	87.0299	87.3681	94.7206	98.9705	96.168	104.599	99.7716	101.748
330	ENSG00000031691	protein_coding	centromere protein Q [Source:HGNC Symbol;Acc:HGNC:21347]	CENPQ	18.8478	18.1398	18.3875	20.2132	19.9817	17.1214	18.8354	17.668	18.0991	19.7735	18.6397	18.0417	17.5039	18.1382	18.5286	16.4942	18.3488	19.0406
331	ENSG00000031698	protein_coding	seryl-tRNA synthetase 1 [Source:HGNC Symbol;Acc:HGNC:10537]	SARS1	102.637	107.019	100.935	100.027	99.6681	102.189	111.406	112.28	101.992	102.504	108.821	105.568	84.75	87.0418	82.0674	89.2661	84.7358	83.8232
332	ENSG00000031823	protein_coding	RAN binding protein 3 [Source:HGNC Symbol;Acc:HGNC:9850]	RANBP3	70.3266	65.4511	61.7978	68.3207	61.7702	61.6217	63.9634	63.0519	65.9492	64.6843	61.7523	65.1185	55.2814	60.0795	57.0904	59.7043	56.8303	57.0102
333	ENSG00000032219	protein_coding	AT-rich interaction domain 4A [Source:HGNC Symbol;Acc:HGNC:9885]	ARID4A	58.3384	62.0961	57.9179	56.0772	60.041	52.0198	58.3706	53.0715	51.734	59.0477	64.2331	56.6499	61.5407	62.9119	70.3742	60.6336	58.8691	55.6714
334	ENSG00000032389	protein_coding	EARP complex and GARP complex interacting protein 1 [Source:HGNC Symbol;Acc:HGNC:12383]	EIPR1	51.607	49.4722	47.0653	54.5757	51.9715	54.4492	50.1421	51.1159	53.7536	51.0928	50.421	56.0713	47.6373	48.9678	44.0215	46.6948	50.9264	49.7212
335	ENSG00000032444	protein_coding	patatin like phospholipase domain containing 6 [Source:HGNC Symbol;Acc:HGNC:16268]	PNPLA6	43.7858	40.7719	37.3373	46.0861	41.02	41.5696	38.2494	43.7655	42.8009	41.8198	39.0226	45.341	36.5034	35.9497	39.3356	36.9958	36.9525	37.5977
336	ENSG00000032742	protein_coding	intraflagellar transport 88 [Source:HGNC Symbol;Acc:HGNC:20606]	IFT88	29.5538	29.9676	29.5775	28.183	30.5969	27.0318	31.9495	26.502	26.3331	27.9556	27.8925	27.7727	33.4015	30.1215	35.8104	30.8976	34.6164	35.7011
337	ENSG00000033011	protein_coding	ALG1 chitobiosyldiphosphodolichol beta-mannosyltransferase [Source:HGNC Symbol;Acc:HGNC:18294]	ALG1	15.4501	14.8985	14.62	17.8454	14.8421	16.0031	14.7855	17.1285	13.5938	14.5915	13.5439	16.5163	11.4662	13.3994	13.3268	12.4868	14.0589	13.5367
338	ENSG00000033030	protein_coding	zinc finger CCHC-type containing 8 [Source:HGNC Symbol;Acc:HGNC:25265]	ZCCHC8	51.7352	56.8646	59.8859	54.5179	54.2771	51.9813	59.7206	56.4433	55.0742	55.593	53.17	52.4945	49.3544	48.9133	51.9316	51.8057	49.1	50.1675
339	ENSG00000033050	protein_coding	ATP binding cassette subfamily F member 2 [Source:HGNC Symbol;Acc:HGNC:71]	ABCF2	28.9769	28.0342	27.3845	27.3167	28.4354	28.69	26.0353	25.8277	27.0322	26.4555	28.0266	25.9317	21.8245	21.4064	22.0107	20.3854	21.9591	22.3876
340	ENSG00000033100	protein_coding	chondroitin polymerizing factor 2 [Source:HGNC Symbol;Acc:HGNC:29270]	CHPF2	36.4134	35.8815	37.8997	37.7121	35.7844	36.518	36.128	39.1124	41.9465	36.2286	36.4748	38.24	36.2819	36.7122	34.5637	32.9884	36.7826	36.6308
341	ENSG00000033170	protein_coding	fucosyltransferase 8 [Source:HGNC Symbol;Acc:HGNC:4019]	FUT8	24.297	23.4851	25.5851	26.0462	27.811	23.6384	25.1353	26.2323	24.4688	29.3193	26.3503	25.7739	25.2588	23.3673	21.6238	25.264	21.7892	23.9867
342	ENSG00000033178	protein_coding	ubiquitin like modifier activating enzyme 6 [Source:HGNC Symbol;Acc:HGNC:25581]	UBA6	129.05	126.979	133.099	121.568	125.75	114.297	122.655	118.349	111.857	129.687	130.746	122.294	126.682	130.944	132.236	135.032	132.901	132.094
343	ENSG00000033327	protein_coding	GRB2 associated binding protein 2 [Source:HGNC Symbol;Acc:HGNC:14458]	GAB2	138.922	140.456	148.787	136.006	133.915	152.782	144.576	146.065	143.395	136.187	144.223	144.544	200.464	204.259	201.837	210.649	216.363	200.372
344	ENSG00000033627	protein_coding	ATPase H+ transporting V0 subunit a1 [Source:HGNC Symbol;Acc:HGNC:865]	ATP6V0A1	86.0331	89.1068	88.7324	86.1083	83.9133	84.2575	93.3415	90.3632	87.8545	90.0943	83.5433	91.5761	82.4235	87.2052	86.0654	80.6125	80.1486	80.5878
345	ENSG00000033800	protein_coding	protein inhibitor of activated STAT 1 [Source:HGNC Symbol;Acc:HGNC:2752]	PIAS1	73.7243	74.9475	73.9999	74.8467	75.9879	74.4628	78.8774	70.807	74.4161	76.0483	79.9227	73.6396	85.3039	86.6605	84.9047	80.1478	83.6315	85.4223
346	ENSG00000033867	protein_coding	solute carrier family 4 member 7 [Source:HGNC Symbol;Acc:HGNC:11033]	SLC4A7	118.6	121.69	125.339	110.364	122.676	108.937	123.491	108.975	119.703	120.459	120.152	113.984	117.819	125.66	122.22	125.913	115.02	119.041
347	ENSG00000034053	protein_coding	amyloid beta precursor protein binding family A member 2 [Source:HGNC Symbol;Acc:HGNC:579]	APBA2	124.562	127.377	129.331	127.17	121.667	124.207	123.812	124.013	129.49	118.186	120.219	122.663	121.807	117.762	120.457	114.007	121.816	119.487
348	ENSG00000034152	protein_coding	mitogen-activated protein kinase kinase 3 [Source:HGNC Symbol;Acc:HGNC:6843]	MAP2K3	9.87265	8.81401	8.82826	7.73878	7.73328	8.86921	6.7499	8.49684	8.70001	7.72756	6.83902	8.62635	5.92696	6.86312	5.97557	6.96938	6.11627	6.09894
349	ENSG00000034510	protein_coding	thymosin beta 10 [Source:HGNC Symbol;Acc:HGNC:11879]	TMSB10	347.466	343.803	330.019	346.801	344.155	354.306	342.381	336.637	345.359	337.558	362.602	344.318	362.376	343.21	335.664	356.542	354.829	344.887
350	ENSG00000034533	protein_coding	asteroid homolog 1 [Source:HGNC Symbol;Acc:HGNC:25021]	ASTE1	12.3088	12.1122	13.2705	10.6264	11.6239	10.8359	12.6641	11.3966	10.875	12.3186	10.4597	11.4141	11.2446	9.64105	9.45774	9.98944	9.55667	10.3384
351	ENSG00000034677	protein_coding	ring finger protein 19A, RBR E3 ubiquitin protein ligase [Source:HGNC Symbol;Acc:HGNC:13432]	RNF19A	51.4147	48.7329	49.2583	48.3962	50.3384	48.5107	52.4564	47.6767	46.4518	48.5473	50.7563	49.3911	52.401	55.4496	54.1241	52.1542	51.4361	48.0105
352	ENSG00000034693	protein_coding	peroxisomal biogenesis factor 3 [Source:HGNC Symbol;Acc:HGNC:8858]	PEX3	10.6419	11.0317	9.50303	10.2799	11.4798	9.87182	11.5713	10.7222	8.15626	10.0458	11.3313	10.8881	8.69657	10.5126	10.1026	9.75713	10.1513	9.74343
353	ENSG00000034713	protein_coding	GABA type A receptor associated protein like 2 [Source:HGNC Symbol;Acc:HGNC:13291]	GABARAPL2	72.2498	71.1945	68.4893	71.0928	74.1627	72.6118	75.3418	73.1672	78.5331	68.639	72.4802	72.9558	77.7152	72.1717	70.4172	75.037	74.2872	74.9351
354	ENSG00000035115	protein_coding	SH3 and SYLF domain containing 1 [Source:HGNC Symbol;Acc:HGNC:29546]	SH3YL1	72.3139	73.4122	74.9558	73.2296	75.0753	66.8276	73.9918	68.3119	73.0956	69.3208	67.2504	68.5374	75.0564	76.5837	78.4562	72.075	71.4414	74.8979
355	ENSG00000035141	protein_coding	family with sequence similarity 136 member A [Source:HGNC Symbol;Acc:HGNC:25911]	FAM136A	68.2751	64.9962	67.8145	64.6823	69.8877	64.7067	70.199	70.6047	69.7554	68.3208	69.2618	65.1711	65.252	56.7024	60.7875	61.2144	58.6992	57.754
356	ENSG00000035403	protein_coding	vinculin [Source:HGNC Symbol;Acc:HGNC:12665]	VCL	68.0828	70.7964	65.1717	63.4695	61.8182	64.8609	66.0205	68.5816	74.3385	64.9115	65.9764	67.4328	61.0976	61.2778	58.8959	58.4847	53.7297	56.0061
357	ENSG00000035499	protein_coding	DEP domain containing 1B [Source:HGNC Symbol;Acc:HGNC:24902]	DEPDC1B	33.5285	34.9717	32.5015	35.1133	36.8892	36.5951	35.8066	36.8871	35.9652	37.1378	38.8215	34.6632	43.7044	45.6452	44.1934	41.4678	47.2737	45.6677
358	ENSG00000035681	protein_coding	neutral sphingomyelinase activation associated factor [Source:HGNC Symbol;Acc:HGNC:8017]	NSMAF	44.6833	43.6151	44.7036	43.2563	43.2295	45.0787	44.9993	46.3954	44.7429	47.1381	43.582	44.4468	44.0922	41.9413	40.5823	43.094	42.8564	44.9239
359	ENSG00000035687	protein_coding	adenylosuccinate synthase 2 [Source:HGNC Symbol;Acc:HGNC:292]	ADSS2	85.6484	84.842	88.4513	82.7009	84.0094	86.1085	89.9987	88.7447	92.5153	83.2304	87.4992	86.0531	79.2662	79.0348	79.402	74.8046	77.2604	75.9392
360	ENSG00000035862	protein_coding	TIMP metallopeptidase inhibitor 2 [Source:HGNC Symbol;Acc:HGNC:11821]	TIMP2	647.107	613.91	586.432	623.029	596.279	609.97	592.32	619.055	622.983	591.568	569.851	606.685	520.077	521.706	488.148	483.036	503.743	505.691
361	ENSG00000035928	protein_coding	replication factor C subunit 1 [Source:HGNC Symbol;Acc:HGNC:9969]	RFC1	144.243	138.238	141.14	137.219	145.299	140.905	143.419	127.453	122.422	137.96	144.491	140.967	135.766	135.247	139.459	133.58	141.736	134.697
362	ENSG00000036054	protein_coding	TBC1 domain family member 23 [Source:HGNC Symbol;Acc:HGNC:25622]	TBC1D23	34.2337	34.3462	35.9316	33.0342	36.0246	34.2429	33.4281	32.0317	31.7706	36.4105	35.402	33.4534	34.2878	37.4748	37.1001	33.2788	36.5277	36.3333
363	ENSG00000036257	protein_coding	cullin 3 [Source:HGNC Symbol;Acc:HGNC:2553]	CUL3	125.652	123.567	132.424	122.608	128.776	123.706	130.241	129.948	125.995	125.914	129.07	121.716	133.052	130.454	131.42	132.709	130.99	125.103
364	ENSG00000036549	protein_coding	zinc finger ZZ-type containing 3 [Source:HGNC Symbol;Acc:HGNC:24523]	ZZZ3	86.2895	91.95	91.4315	83.5095	88.6686	83.1392	86.1416	81.0571	78.2224	86.5487	89.5107	83.1602	87.1873	91.8895	88.6878	86.3622	90.5548	89.4759
365	ENSG00000036565	protein_coding	solute carrier family 18 member A1 [Source:HGNC Symbol;Acc:HGNC:10934]	SLC18A1	49.7479	49.529	46.503	48.0497	50.2904	47.4696	48.4707	51.5205	47.2286	49.5928	49.013	47.0241	41.4333	40.2527	37.702	36.5312	38.4815	37.263
366	ENSG00000036672	protein_coding	ubiquitin specific peptidase 2 [Source:HGNC Symbol;Acc:HGNC:12618]	USP2	5.76973	4.26484	4.10486	4.85117	4.85131	4.28036	4.11423	4.85534	4.19465	4.90928	5.83328	5.52297	3.60049	3.7039	3.26722	4.35586	3.48288	3.42136
367	ENSG00000037042	protein_coding	tubulin gamma 2 [Source:HGNC Symbol;Acc:HGNC:12419]	TUBG2	11.6036	9.72384	12.9331	12.1279	12.0082	10.296	11.507	11.0594	10.7973	11.1822	8.78345	11.3089	9.74902	10.2947	9.24279	11.4414	10.7884	11.826
368	ENSG00000037241	protein_coding	ribosomal protein L26 like 1 [Source:HGNC Symbol;Acc:HGNC:17050]	RPL26L1	12.7575	11.4298	11.3586	11.4349	11.4798	11.2986	11.6355	11.0594	11.6518	11.2732	12.5382	12.2031	10.4691	11.0572	11.9082	12.0222	9.55667	10.9707
369	ENSG00000037474	protein_coding	NOP2/Sun RNA methyltransferase 2 [Source:HGNC Symbol;Acc:HGNC:25994]	NSUN2	145.269	145.63	148.787	139.76	148.998	144.414	143.034	150.92	150.464	146.415	142.077	143.597	141.749	138.896	141.694	150.713	141.354	143.883
370	ENSG00000037637	protein_coding	F-box protein 42 [Source:HGNC Symbol;Acc:HGNC:29249]	FBXO42	39.4265	41.1131	39.924	40.7152	40.7318	42.418	37.8637	41.3378	40.6259	42.6834	38.9556	39.1342	43.1505	43.6298	40.7113	38.9124	38.7364	39.6803
371	ENSG00000037749	protein_coding	microfibril associated protein 3 [Source:HGNC Symbol;Acc:HGNC:7034]	MFAP3	134.05	138.863	131.918	133.869	142.465	136.509	147.919	138.782	138.423	133.778	141.407	128.975	135.655	139.659	135.117	128.875	134.346	138.528
372	ENSG00000037757	protein_coding	methylthioribose-1-phosphate isomerase 1 [Source:HGNC Symbol;Acc:HGNC:28469]	MRI1	27.9511	26.442	27.3282	31.4749	27.7149	28.8828	28.4782	28.2554	29.6732	27.2283	24.9423	28.9824	23.8186	19.8268	21.7098	22.5924	21.8317	22.7223
373	ENSG00000037897	protein_coding	methyltransferase like 1 [Source:HGNC Symbol;Acc:HGNC:7030]	METTL1	7.69297	10.3494	11.4149	10.7419	10.8074	10.7587	10.607	11.936	10.4089	8.86397	9.85623	10.3621	9.1951	8.38826	8.29702	9.35058	8.91956	9.22278
374	ENSG00000038002	protein_coding	aspartylglucosaminidase [Source:HGNC Symbol;Acc:HGNC:318]	AGA	11.2189	11.0317	10.965	10.7996	12.6807	11.7613	10.8641	11.2617	11.8072	11.3641	11.7336	10.1517	12.0201	11.493	11.7362	11.4995	12.5723	11.826
375	ENSG00000038210	protein_coding	phosphatidylinositol 4-kinase type 2 beta [Source:HGNC Symbol;Acc:HGNC:18215]	PI4K2B	16.0911	16.377	18.1626	14.207	15.4185	16.6973	17.2926	15.7124	17.5554	17.0916	14.5497	15.5169	12.851	12.8003	11.8652	15.1003	12.6148	12.4582
376	ENSG00000038219	protein_coding	biorientation of chromosomes in cell division 1 like 1 [Source:HGNC Symbol;Acc:HGNC:31792]	BOD1L1	243.418	263.169	248.203	251.857	258.369	224.275	235.732	221.39	197.304	227.6	240.237	246.377	233.533	264.557	295.253	265.069	282.835	269.655
377	ENSG00000038274	protein_coding	methionine adenosyltransferase 2B [Source:HGNC Symbol;Acc:HGNC:6905]	MAT2B	80.7762	83.1929	81.7598	81.9502	87.2276	86.1856	81.4488	80.7874	86.9224	83.3213	90.7846	82.7394	86.7441	89.4384	86.4093	81.774	90.5972	90.48
378	ENSG00000038358	protein_coding	enhancer of mRNA decapping 4 [Source:HGNC Symbol;Acc:HGNC:17157]	EDC4	66.9289	65.1099	66.8586	67.7432	58.6	62.6629	59.6563	64.1983	62.2206	62.9569	59.7408	62.9093	56.3892	60.7876	56.4025	56.1035	55.8959	59.2787
379	ENSG00000038382	protein_coding	trio Rho guanine nucleotide exchange factor [Source:HGNC Symbol;Acc:HGNC:12303]	TRIO	413.369	406.582	401.264	410.964	387.673	408.524	400.173	409.129	407.968	402.515	390.226	406.122	428.957	431.396	424.094	440.29	417.775	428.264
380	ENSG00000038427	protein_coding	versican [Source:HGNC Symbol;Acc:HGNC:2464]	VCAN	27.6306	27.6362	25.2477	26.8547	27.6189	27.2246	25.1996	24.0744	24.0804	26.6374	26.6856	27.2993	37.7775	37.039	37.1431	33.2207	39.2885	36.9655
381	ENSG00000038532	protein_coding	C-type lectin domain containing 16A [Source:HGNC Symbol;Acc:HGNC:29013]	CLEC16A	73.8525	74.8906	75.968	71.266	70.5602	72.6118	74.6989	75.5949	81.0188	70.9118	68.5243	69.7472	68.2432	67.2694	65.1294	67.4287	66.1322	60.9522
382	ENSG00000039123	protein_coding	Mtr4 exosome RNA helicase [Source:HGNC Symbol;Acc:HGNC:18734]	MTREX	122.703	124.249	122.865	121.395	120.13	118.809	126.448	117.674	105.876	122.505	128.265	118.981	115.714	117.871	117.061	115.808	120.117	118
383	ENSG00000039319	protein_coding	zinc finger FYVE-type containing 16 [Source:HGNC Symbol;Acc:HGNC:20756]	ZFYVE16	123.793	121.861	124.608	117.006	129.064	115.917	122.527	110.189	117.295	123.732	123.572	116.877	125.076	126.096	132.322	116.621	119.607	122.165
384	ENSG00000039523	protein_coding	RHO family interacting cell polarization regulator 1 [Source:HGNC Symbol;Acc:HGNC:25836]	RIPOR1	55.5176	53.339	51.6762	53.4784	47.6966	50.6702	52.2635	54.69	52.2777	51.2292	48.2754	49.6541	49.299	55.5041	52.0606	50.528	51.4361	46.1883
385	ENSG00000039560	protein_coding	retinoic acid induced 14 [Source:HGNC Symbol;Acc:HGNC:14873]	RAI14	47.44	45.2073	47.5151	43.4295	42.9413	45.0016	49.7564	45.4513	44.7429	42.638	49.3482	42.0798	45.6985	43.1396	44.5803	44.8944	42.0918	48.1965
386	ENSG00000039650	protein_coding	polynucleotide kinase 3'-phosphatase [Source:HGNC Symbol;Acc:HGNC:9154]	PNKP	36.4134	39.8052	44.7598	44.9889	42.7012	42.9193	39.0851	39.1124	40.9366	44.1835	40.0954	42.5532	37.4451	39.2723	42.9897	46.2883	40.1805	45.333
387	ENSG00000040199	protein_coding	PH domain and leucine rich repeat protein phosphatase 2 [Source:HGNC Symbol;Acc:HGNC:29149]	PHLPP2	42.5037	42.2504	39.8115	40.2532	38.3782	40.0657	42.4922	39.2473	41.7911	40.9561	37.0112	39.029	34.0108	32.8994	33.7039	30.3168	31.3034	32.9863
388	ENSG00000040275	protein_coding	spindle apparatus coiled-coil protein 1 [Source:HGNC Symbol;Acc:HGNC:26010]	SPDL1	75.9681	73.1847	80.4665	72.7676	76.2281	72.3419	75.9846	71.7511	73.9501	75.2301	75.9668	74.9546	77.7706	76.8016	80.0899	76.0243	79.2142	82.3357
389	ENSG00000040341	protein_coding	staufen double-stranded RNA binding protein 2 [Source:HGNC Symbol;Acc:HGNC:11371]	STAU2	68.788	69.0905	67.5334	67.9164	70.8004	69.5269	73.3489	70.8744	68.9786	71.0481	71.6756	69.6946	74.6686	67.7597	72.7386	75.2693	74.0748	76.4599
390	ENSG00000040487	protein_coding	solute carrier family 66 member 1 [Source:HGNC Symbol;Acc:HGNC:26001]	SLC66A1	9.55211	10.065	10.6276	10.8574	9.89476	11.2215	10.2213	11.8012	11.3411	10.8186	10.9961	10.6251	9.08432	9.09635	7.5232	7.434	7.85771	7.92118
391	ENSG00000040531	protein_coding	cystinosin, lysosomal cystine transporter [Source:HGNC Symbol;Acc:HGNC:2518]	CTNS	17.3092	18.5947	18.2188	18.1341	17.1477	17.16	18.514	17.3983	17.0893	16.3643	16.4271	16.5689	14.3466	16.0139	14.4875	16.32	15.5455	15.3961
392	ENSG00000040608	protein_coding	reticulon 4 receptor [Source:HGNC Symbol;Acc:HGNC:18601]	RTN4R	6.73135	5.85705	6.69148	7.21901	5.95607	6.36269	5.84991	7.55274	6.9134	5.04565	6.36967	6.78536	5.81618	6.48183	5.15877	6.15628	5.43668	6.43364
393	ENSG00000040633	protein_coding	PHD finger protein 23 [Source:HGNC Symbol;Acc:HGNC:28428]	PHF23	60.5822	59.4235	57.8054	58.6183	56.3425	59.4237	57.6634	60.6243	58.9581	56.5021	57.7964	55.9661	61.153	52.3994	56.4025	55.1162	53.0501	54.221
394	ENSG00000040933	protein_coding	inositol polyphosphate-4-phosphatase type I A [Source:HGNC Symbol;Acc:HGNC:6074]	INPP4A	91.6746	90.5284	90.6443	84.4335	91.3584	88.4607	91.2201	86.3845	92.826	83.7304	88.1027	85.8427	80.374	83.011	80.6487	75.792	78.4496	78.3565
395	ENSG00000041353	protein_coding	RAB27B, member RAS oncogene family [Source:HGNC Symbol;Acc:HGNC:9767]	RAB27B	1.6027	2.10399	2.24924	2.48334	1.82525	1.65816	2.63568	1.88819	2.01964	1.54551	2.07853	3.20858	1.88333	1.57961	1.80557	1.21964	1.78391	1.48755
396	ENSG00000041357	protein_coding	proteasome 20S subunit alpha 4 [Source:HGNC Symbol;Acc:HGNC:9533]	PSMA4	132.383	130.106	131.693	130.751	130.265	135.082	137.505	128.194	129.801	133.732	130.478	128.08	118.982	114.276	118.265	125.739	120.626	123.132
397	ENSG00000041515	protein_coding	myosin XVI [Source:HGNC Symbol;Acc:HGNC:29822]	MYO16	12.6934	14.3867	12.652	13.052	12.6807	13.3038	14.0784	13.487	14.6036	13.5005	13.5439	13.4129	14.3466	14.6522	15.6053	13.7645	15.3756	13.9829
398	ENSG00000041802	protein_coding	large 60S subunit nuclear export GTPase 1 [Source:HGNC Symbol;Acc:HGNC:25652]	LSG1	71.6087	69.4885	70.5698	74.0959	71.713	68.6785	76.1132	71.6836	69.4447	69.5481	70.871	72.0616	67.9662	61.2778	62.0342	66.0348	64.6456	65.1917
399	ENSG00000041880	protein_coding	poly(ADP-ribose) polymerase family member 3 [Source:HGNC Symbol;Acc:HGNC:273]	PARP3	6.73135	7.16494	7.36625	7.39226	7.25296	6.70975	6.87847	7.0807	6.75804	6.27296	6.70492	7.31136	6.09314	5.99161	8.21104	7.08553	7.68781	8.03275
400	ENSG00000041982	protein_coding	tenascin C [Source:HGNC Symbol;Acc:HGNC:5318]	TNC	20.6428	21.8929	21.3678	19.6357	18.0603	20.5534	20.8283	21.7141	21.8277	19.3644	19.5113	19.6723	19.9966	17.0489	18.1847	16.9588	17.8816	17.6646
401	ENSG00000041988	protein_coding	THAP domain containing 3 [Source:HGNC Symbol;Acc:HGNC:20855]	THAP3	11.5395	11.9416	12.9893	13.514	11.672	12.6097	12.0213	11.0594	14.0598	11.0459	10.3926	12.6239	11.2446	11.0028	12.8109	11.2091	11.2132	13.3135
402	ENSG00000042062	protein_coding	RIPOR family member 3 [Source:HGNC Symbol;Acc:HGNC:16168]	RIPOR3	1.47449	2.33145	1.96808	2.07907	1.68115	1.54247	1.92854	1.95562	2.01964	1.63643	1.87738	2.10399	2.54804	3.37709	3.56815	4.12355	3.86514	3.83043
403	ENSG00000042088	protein_coding	tyrosyl-DNA phosphodiesterase 1 [Source:HGNC Symbol;Acc:HGNC:18884]	TDP1	44.1064	37.5306	37.3936	39.5024	41.1641	40.1428	42.1065	41.675	45.675	43.0471	43.0456	42.2902	49.576	46.6801	45.7841	45.4171	40.223	46.7833
404	ENSG00000042317	protein_coding	spermatogenesis associated 7 [Source:HGNC Symbol;Acc:HGNC:20423]	SPATA7	7.37243	7.67672	7.02887	6.75699	7.63722	6.97968	7.07133	7.14813	9.0884	8.04576	6.83902	6.62756	8.86275	8.87848	9.1998	7.55016	9.1744	8.88809
405	ENSG00000042429	protein_coding	mediator complex subunit 17 [Source:HGNC Symbol;Acc:HGNC:2375]	MED17	10.4496	11.1455	11.2462	12.3589	11.5759	11.2215	10.4784	9.30606	9.55447	13.5914	10.2585	11.9401	14.1804	12.419	13.0689	15.5649	12.1901	12.1607
406	ENSG00000042445	protein_coding	retinol saturase [Source:HGNC Symbol;Acc:HGNC:25991]	RETSAT	14.9372	12.3965	13.7766	15.3043	13.113	14.692	14.4641	14.094	13.3607	14.7733	13.0075	14.6227	12.9064	15.8505	15.1754	14.2291	13.6342	15.9167
407	ENSG00000042753	protein_coding	adaptor related protein complex 2 subunit sigma 1 [Source:HGNC Symbol;Acc:HGNC:565]	AP2S1	54.8124	53.7939	52.0136	60.9284	57.2071	58.074	53.0992	53.2738	61.2108	56.4567	60.009	58.1227	51.9025	54.0879	50.169	50.1214	54.5367	52.9938
408	ENSG00000043093	protein_coding	defective in cullin neddylation 1 domain containing 1 [Source:HGNC Symbol;Acc:HGNC:18184]	DCUN1D1	49.2991	54.4194	52.5759	50.1288	53.3645	49.0891	53.5492	44.8444	51.5786	52.0474	49.9517	47.4975	50.1853	53.87	52.2755	48.1468	49.0576	50.0931
409	ENSG00000043143	protein_coding	jade family PHD finger 2 [Source:HGNC Symbol;Acc:HGNC:22984]	JADE2	13.8473	16.0358	14.2264	13.3985	12.8728	13.0339	15.7498	17.7355	15.6911	13.8642	12.3371	13.3077	16.673	14.0531	15.1754	14.2872	14.2288	14.987
410	ENSG00000043514	protein_coding	tRNA isopentenyltransferase 1 [Source:HGNC Symbol;Acc:HGNC:20286]	TRIT1	29.2333	27.5793	29.1276	28.7605	27.9071	27.456	26.7425	25.9626	27.3429	27.592	28.0266	27.8779	30.2441	32.2458	32.1563	35.1373	33.3422	36.3333
411	ENSG00000044090	protein_coding	cullin 7 [Source:HGNC Symbol;Acc:HGNC:21024]	CUL7	40.7728	38.7248	42.5668	42.6788	41.1641	41.7238	41.2065	41.3378	43.4224	41.9107	43.0456	45.1832	46.4186	50.4385	49.8251	47.2175	50.077	49.3121
412	ENSG00000044115	protein_coding	catenin alpha 1 [Source:HGNC Symbol;Acc:HGNC:2509]	CTNNA1	179.439	176.28	179.545	187.636	181.132	184.094	185.719	190.167	180.603	180.37	186.129	177.577	201.96	193.311	189.327	200.312	203.069	194.906
413	ENSG00000044446	protein_coding	phosphorylase kinase regulatory subunit alpha 2 [Source:HGNC Symbol;Acc:HGNC:8926]	PHKA2	33.785	33.7776	32.6702	36.6726	34.4395	36.2866	34.1352	33.5827	33.8679	35.8195	33.4576	33.8216	40.5471	42.1047	42.001	39.6093	42.1768	44.7379
414	ENSG00000044459	protein_coding	centlein [Source:HGNC Symbol;Acc:HGNC:23432]	CNTLN	42.8883	48.6761	45.4908	42.5055	49.762	43.2278	41.528	40.596	41.9465	42.2289	45.3253	47.4449	48.8005	55.5041	53.2643	50.1214	53.22	54.8161
415	ENSG00000044574	protein_coding	heat shock protein family A (Hsp70) member 5 [Source:HGNC Symbol;Acc:HGNC:5238]	HSPA5	572.421	557.785	502.03	452.199	459.482	433.589	547.321	613.188	550.975	483.246	485.168	463.351	138.148	137.371	130.947	130.734	135.45	129.193
416	ENSG00000046647	protein_coding	gem nuclear organelle associated protein 8 [Source:HGNC Symbol;Acc:HGNC:26044]	GEMIN8	26.8613	26.5558	28.2842	26.5082	30.9812	28.69	28.7996	26.03	28.8188	26.8647	26.3503	26.2999	31.1304	32.4092	31.8124	31.1299	32.705	31.7963
417	ENSG00000046651	protein_coding	OFD1 centriole and centriolar satellite protein [Source:HGNC Symbol;Acc:HGNC:2567]	OFD1	51.9917	54.59	56.2872	51.7458	56.5346	51.6342	55.992	51.5879	52.1224	53.3202	58.4669	52.4945	55.6137	58.5544	59.6267	56.8004	61.3751	57.2705
418	ENSG00000046653	protein_coding	glycoprotein M6B [Source:HGNC Symbol;Acc:HGNC:4461]	GPM6B	16.9886	18.5379	20.0744	18.1341	18.7328	18.2012	18.2569	17.668	21.0509	18.8189	17.9021	17.6735	19.3319	19.2821	18.8295	18.1785	19.7505	18.8175
419	ENSG00000047056	protein_coding	WD repeat domain 37 [Source:HGNC Symbol;Acc:HGNC:31406]	WDR37	35.2595	33.0383	34.4133	38.7516	32.2781	37.2121	35.8066	34.1897	32.9357	35.865	33.0553	37.5036	36.5034	36.9846	38.4758	36.1246	35.5933	33.4326
420	ENSG00000047188	protein_coding	YTH domain containing 2 [Source:HGNC Symbol;Acc:HGNC:24721]	YTHDC2	93.7902	98.9444	92.9497	91.3638	94.3845	88.345	93.5343	94.7465	88.1653	90.6398	92.4609	91.2605	98.6535	100.169	105.454	93.2154	99.3894	102.529
421	ENSG00000047230	protein_coding	CTP synthase 2 [Source:HGNC Symbol;Acc:HGNC:2520]	CTPS2	61.9284	60.5608	61.4042	57.4055	63.4033	62.8943	62.5491	62.3101	62.1429	63.7297	61.1489	63.0671	67.7446	70.7555	69.2135	66.151	68.6381	71.6625
422	ENSG00000047249	protein_coding	ATPase H+ transporting V1 subunit H [Source:HGNC Symbol;Acc:HGNC:18303]	ATP6V1H	36.0929	35.0286	28.7902	31.5326	32.7584	33.2788	33.8138	33.785	33.7902	31.8648	33.1223	30.613	31.6843	31.2653	31.7264	30.6072	33.0873	30.4203
423	ENSG00000047315	protein_coding	RNA polymerase II subunit B [Source:HGNC Symbol;Acc:HGNC:9188]	POLR2B	269.318	259.814	270.471	254.109	266.678	264.264	278.032	269.471	253.621	259.283	269.672	255.477	268.929	269.731	265.333	268.089	267.629	273.671
424	ENSG00000047346	protein_coding	family with sequence similarity 214 member A [Source:HGNC Symbol;Acc:HGNC:25609]	FAM214A	25.9638	23.4282	25.8662	25.2954	28.0992	25.1423	24.9425	24.0744	25.7893	25.2737	26.8197	27.9305	35.451	37.5293	38.9057	33.6272	35.3384	35.887
425	ENSG00000047410	protein_coding	translocated promoter region, nuclear basket protein [Source:HGNC Symbol;Acc:HGNC:12017]	TPR	525.366	550.79	548.645	505.677	540.129	472.845	510.55	468.607	412.862	485.609	504.411	522.736	483.241	542.023	606.628	534.493	600.286	586.948
426	ENSG00000047578	protein_coding	katanin interacting protein [Source:HGNC Symbol;Acc:HGNC:29068]	KATNIP	32.8875	32.0148	32.4453	34.0737	30.2126	31.1965	31.4995	36.0778	29.2072	30.2284	33.1223	31.1916	32.9029	31.4832	34.6497	34.2661	30.2416	33.0979
427	ENSG00000047579	protein_coding	dystrobrevin binding protein 1 [Source:HGNC Symbol;Acc:HGNC:17328]	DTNBP1	8.97513	7.79045	8.09726	7.50777	8.88607	8.25222	9.12844	8.36197	8.85537	7.95485	8.5823	9.73095	7.47794	7.78909	7.69516	8.2471	8.40987	7.66086
428	ENSG00000047621	protein_coding	chromosome 12 open reading frame 4 [Source:HGNC Symbol;Acc:HGNC:1184]	C12orf4	34.1055	33.7776	29.3525	34.016	32.134	31.1965	34.7138	34.4594	33.5572	31.9558	35.2008	30.4026	30.7427	30.6117	28.1583	29.9683	32.3653	31.6103
429	ENSG00000047634	protein_coding	Scm polycomb group protein like 1 [Source:HGNC Symbol;Acc:HGNC:10580]	SCML1	27.9511	30.9343	32.6139	26.2194	31.9418	27.1089	26.6139	29.8738	28.8188	30.183	28.1607	29.5084	32.4598	31.9189	32.2853	34.0919	30.7088	33.6185
430	ENSG00000047644	protein_coding	WWC family member 3 [Source:HGNC Symbol;Acc:HGNC:29237]	WWC3	40.0035	38.5542	37.506	39.0981	37.6577	35.1298	37.8637	37.4265	36.0429	38.0469	38.084	35.9782	28.1392	27.2891	30.7806	31.246	27.4383	27.3337
431	ENSG00000047849	protein_coding	microtubule associated protein 4 [Source:HGNC Symbol;Acc:HGNC:6862]	MAP4	261.176	259.757	255.176	260.289	251.212	265.112	256.432	263.941	257.116	257.464	264.777	263.314	252.034	252.574	250.286	258.738	250.257	245.78
432	ENSG00000047932	protein_coding	golgi associated PDZ and coiled-coil motif containing [Source:HGNC Symbol;Acc:HGNC:17643]	GOPC	88.2769	83.9321	84.0653	81.0261	85.4023	78.2804	84.2131	86.6542	80.0867	80.9576	84.8843	80.8984	78.7677	82.5208	78.6282	73.5269	77.4303	76.3111
433	ENSG00000048028	protein_coding	ubiquitin specific peptidase 28 [Source:HGNC Symbol;Acc:HGNC:12625]	USP28	48.2734	49.3585	49.5957	46.9524	47.2643	48.6264	52.0064	49.43	48.5492	53.5929	47.0685	47.3397	44.9231	47.0069	45.3542	40.132	40.9875	41.986
434	ENSG00000048052	protein_coding	histone deacetylase 9 [Source:HGNC Symbol;Acc:HGNC:14065]	HDAC9	217.455	220.237	212.44	230.257	233.68	228.748	216.768	207.026	208.723	226.509	237.958	224.075	263.888	274.688	266.407	265.359	269.286	270.845
435	ENSG00000048140	protein_coding	tetraspanin 17 [Source:HGNC Symbol;Acc:HGNC:13594]	TSPAN17	51.607	53.1684	53.8692	54.7489	53.0282	54.5264	47.635	52.2623	54.8411	51.0928	51.6949	54.2303	47.3603	51.6368	47.9765	46.811	51.9883	52.0269
436	ENSG00000048162	protein_coding	NOP16 nucleolar protein [Source:HGNC Symbol;Acc:HGNC:26934]	NOP16	40.0035	38.5542	38.5182	39.4447	40.972	40.6056	38.6994	40.1914	39.0724	39.2288	41.5705	38.8186	35.728	33.6075	33.8759	37.3442	32.8749	34.5483
437	ENSG00000048342	protein_coding	coiled-coil and C2 domain containing 2A [Source:HGNC Symbol;Acc:HGNC:29253]	CC2D2A	14.1679	13.7612	14.0577	14.0337	14.2177	12.6097	13.3712	12.8127	12.3509	15.4551	13.4098	15.2539	12.9064	14.5433	14.3156	13.7064	12.6998	16.1027
438	ENSG00000048392	protein_coding	ribonucleotide reductase regulatory TP53 inducible subunit M2B [Source:HGNC Symbol;Acc:HGNC:17296]	RRM2B	21.8609	23.6557	26.6535	22.9853	23.6321	23.9469	24.6211	22.1862	20.6625	25.9101	25.881	24.0907	22.2677	21.243	20.5491	21.6051	21.1946	21.8669
439	ENSG00000048405	protein_coding	zinc finger protein 800 [Source:HGNC Symbol;Acc:HGNC:27267]	ZNF800	75.9681	71.4788	62.3039	67.8587	67.39	70.7609	70.5847	64.8727	76.6688	64.3206	72.4131	69.1686	67.5784	70.3742	71.5349	61.8532	64.0085	65.3776
440	ENSG00000048471	protein_coding	sorting nexin 29 [Source:HGNC Symbol;Acc:HGNC:30542]	SNX29	21.1557	20.6418	20.8054	20.6752	22.3353	23.2528	20.3783	20.298	23.3036	22.5463	22.3274	22.4075	24.7049	26.3086	23.3434	24.3928	23.3607	23.5776
441	ENSG00000048540	protein_coding	LIM domain only 3 [Source:HGNC Symbol;Acc:HGNC:6643]	LMO3	42.8883	42.9328	40.8237	42.1012	46.2556	46.3513	46.4136	35.2012	40.7813	42.2289	49.6835	44.1838	65.6397	64.6549	63.7108	63.3052	62.6918	66.8652
442	ENSG00000048544	protein_coding	mitochondrial ribosomal protein S10 [Source:HGNC Symbol;Acc:HGNC:14502]	MRPS10	42.3755	41.6817	43.0729	44.0648	44.5264	41.4539	41.8494	41.6075	45.1313	44.7744	44.7889	44.1312	42.9289	41.9413	40.3674	41.1774	40.4778	40.0894
443	ENSG00000048649	protein_coding	remodeling and spacing factor 1 [Source:HGNC Symbol;Acc:HGNC:18118]	RSF1	271.69	267.718	269.009	264.62	282.913	250.227	259.261	230.628	240.182	263.146	269.136	268.732	292.914	311.945	332.697	283.305	321.571	312.868
444	ENSG00000048707	protein_coding	vacuolar protein sorting 13 homolog D [Source:HGNC Symbol;Acc:HGNC:23595]	VPS13D	90.0719	84.1027	79.9042	78.3695	86.411	86.0699	88.0701	87.2612	79.9313	85.5941	88.1027	86.3687	89.8461	86.8784	86.7533	89.905	87.9638	83.1538
445	ENSG00000048828	protein_coding	family with sequence similarity 120A [Source:HGNC Symbol;Acc:HGNC:13247]	FAM120A	168.861	170.196	169.874	158.991	156.827	156.908	167.848	170.072	176.797	165.597	161.052	156.537	145.238	143.744	142.554	138.284	137.574	134.995
446	ENSG00000048991	protein_coding	R3H domain containing 1 [Source:HGNC Symbol;Acc:HGNC:9757]	R3HDM1	128.537	135.167	131.524	130	134.78	126.406	132.041	127.385	121.101	132.96	127.796	130.395	128.676	128.711	129.614	131.024	120.711	127.222
447	ENSG00000049130	protein_coding	KIT ligand [Source:HGNC Symbol;Acc:HGNC:6343]	KITLG	12.6293	13.1926	12.7644	14.207	15.3705	13.4581	14.2712	13.015	14.2929	14.7733	15.2872	12.6765	11.3	9.53211	9.1998	10.8025	9.25935	10.1897
448	ENSG00000049167	protein_coding	ERCC excision repair 8, CSA ubiquitin ligase complex subunit [Source:HGNC Symbol;Acc:HGNC:3439]	ERCC8	35.58	33.6638	35.1443	32.6877	35.4963	35.2069	33.1709	31.2899	34.6447	34.0013	34.3292	34.7684	34.0662	33.9888	31.9414	37.2862	33.7244	34.6226
449	ENSG00000049239	protein_coding	hexose-6-phosphate dehydrogenase/glucose 1-dehydrogenase [Source:HGNC Symbol;Acc:HGNC:4795]	H6PD	67.2494	66.3041	65.2279	70.1687	68.783	65.9021	65.5062	72.8975	69.7554	69.1844	69.3289	67.6432	73.2838	73.6968	75.5759	73.585	76.7932	74.3773
450	ENSG00000049245	protein_coding	vesicle associated membrane protein 3 [Source:HGNC Symbol;Acc:HGNC:12644]	VAMP3	47.44	51.3487	51.5075	52.4966	52.7881	46.7369	48.7921	55.5666	50.3358	47.6382	47.672	53.1783	46.751	47.3337	47.0737	44.9525	45.15	49.9815
451	ENSG00000049246	protein_coding	period circadian regulator 3 [Source:HGNC Symbol;Acc:HGNC:8847]	PER3	42.9524	44.07	42.5106	48.454	43.6618	45.3487	43.6494	46.4629	42.7233	42.7743	40.6989	47.1293	44.5353	47.8784	45.5691	49.5987	49.4398	49.5725
452	ENSG00000049449	protein_coding	reticulocalbin 1 [Source:HGNC Symbol;Acc:HGNC:9934]	RCN1	36.5416	38.6679	38.0683	33.2074	37.5136	37.0579	42.7494	42.0796	41.0143	37.365	35.8713	37.7666	33.8446	35.4594	33.446	31.8268	35.1685	31.9079
453	ENSG00000049540	protein_coding	elastin [Source:HGNC Symbol;Acc:HGNC:3327]	ELN	58.2743	52.8272	53.0258	63.8738	52.0676	59.8093	53.9992	60.3545	59.0358	54.6839	52.7677	57.8071	56.9432	56.2122	54.1241	56.1616	60.3557	55.0392
454	ENSG00000049541	protein_coding	replication factor C subunit 2 [Source:HGNC Symbol;Acc:HGNC:9970]	RFC2	101.098	103.55	101.722	103.203	105.672	105.004	106.713	102.839	103.701	103.186	107.078	106.83	95.9392	91.0725	86.4523	95.3643	94.2075	88.5834
455	ENSG00000049618	protein_coding	AT-rich interaction domain 1B [Source:HGNC Symbol;Acc:HGNC:18040]	ARID1B	219.186	220.18	211.147	217.668	213.362	214.789	207.126	220.513	218.355	227.872	222.067	217.658	239.405	245.329	247.449	274.71	243.079	237.189
456	ENSG00000049656	protein_coding	CLPTM1 like [Source:HGNC Symbol;Acc:HGNC:24308]	CLPTM1L	154.052	149.895	144.064	157.605	150.871	154.941	145.669	158.473	154.58	146.869	151.263	156.326	129.396	128.929	119.511	126.61	126.913	123.95
457	ENSG00000049759	protein_coding	NEDD4 like E3 ubiquitin protein ligase [Source:HGNC Symbol;Acc:HGNC:7728]	NEDD4L	42.2472	41.2837	41.9483	42.0435	44.5745	42.2251	41.7208	39.8542	37.4411	41.7288	46.1969	42.9214	52.1794	47.7695	51.5447	54.5354	50.2468	47.899
458	ENSG00000049769	protein_coding	protein phosphatase 1 regulatory subunit 3F [Source:HGNC Symbol;Acc:HGNC:14944]	PPP1R3F	13.0139	12.5671	12.3708	15.0733	11.8161	12.0313	12.2784	12.8801	13.5161	11.5459	12.0689	11.4141	10.8015	9.64105	11.2203	11.0929	11.2981	9.4831
459	ENSG00000049860	protein_coding	hexosaminidase subunit beta [Source:HGNC Symbol;Acc:HGNC:4879]	HEXB	19.6171	22.2909	22.155	22.4078	22.3833	21.6332	21.9854	23.5349	20.9732	23.41	21.9921	21.0925	21.6583	20.3715	23.1715	18.5269	22.0016	22.2016
460	ENSG00000049883	protein_coding	pentatricopeptide repeat domain 2 [Source:HGNC Symbol;Acc:HGNC:25734]	PTCD2	33.4003	31.1618	32.5015	29.5113	30.9331	33.086	32.1424	34.7291	33.9456	32.0921	33.5246	32.8748	30.7427	30.9385	30.0068	29.4456	28.9249	27.9287
461	ENSG00000050130	protein_coding	JNK1/MAPK8 associated membrane protein [Source:HGNC Symbol;Acc:HGNC:20184]	JKAMP	51.4788	49.6996	52.9695	53.5939	54.181	53.678	51.0421	48.6882	57.0161	50.8201	55.3826	50.3905	52.401	49.9482	49.6101	49.1341	51.8609	49.9815
462	ENSG00000050165	protein_coding	dickkopf WNT signaling pathway inhibitor 3 [Source:HGNC Symbol;Acc:HGNC:2893]	DKK3	45.645	41.5111	42.5106	46.0861	42.8933	46.6983	42.0422	45.1816	45.2866	44.9562	47.0015	45.1306	50.7946	44.5558	49.3952	48.6695	51.2238	46.9321
463	ENSG00000050344	protein_coding	nuclear factor, erythroid 2 like 3 [Source:HGNC Symbol;Acc:HGNC:7783]	NFE2L3	49.4273	51.9174	48.0775	52.0924	52.4038	51.3643	52.7135	50.1718	51.0349	51.0019	50.4881	50.1801	50.0191	51.31	46.9448	51.2249	48.6753	47.1924
464	ENSG00000050393	protein_coding	mitochondrial calcium uniporter regulator 1 [Source:HGNC Symbol;Acc:HGNC:21097]	MCUR1	94.4953	93.4854	90.4193	88.5339	91.9828	91.0058	98.0986	99.1972	98.0304	95.049	86.8958	87.2103	84.0853	83.12	78.0693	80.6125	81.2954	77.873
465	ENSG00000050405	protein_coding	LIM domain and actin binding 1 [Source:HGNC Symbol;Acc:HGNC:24636]	LIMA1	46.7989	48.1643	46.1656	42.6788	45.4871	40.914	49.3064	47.8116	48.8599	42.1834	46.331	43.5	45.9201	45.5362	46.6439	46.5206	42.559	44.7008
466	ENSG00000050426	protein_coding	LETM1 domain containing 1 [Source:HGNC Symbol;Acc:HGNC:24241]	LETMD1	46.6707	49.0741	48.7522	48.3385	48.8494	45.233	47.8279	49.6323	45.442	47.3654	42.9785	45.3936	53.2873	55.0139	54.0811	53.548	58.3594	58.6837
467	ENSG00000050438	protein_coding	solute carrier family 4 member 8 [Source:HGNC Symbol;Acc:HGNC:11034]	SLC4A8	129.242	131.3	127.869	130.058	130.697	135.005	133.841	131.094	134.462	133.914	126.321	127.344	139.588	134.103	127.336	136.077	121.433	134.623
468	ENSG00000050748	protein_coding	mitogen-activated protein kinase 9 [Source:HGNC Symbol;Acc:HGNC:6886]	MAPK9	50.0043	44.2406	43.3541	46.8369	45.6792	45.7728	44.6779	45.5862	49.3259	47.0472	43.1797	48.0235	36.2819	38.3463	37.1001	36.5312	35.9331	35.887
469	ENSG00000050820	protein_coding	BCAR1 scaffold protein, Cas family member [Source:HGNC Symbol;Acc:HGNC:971]	BCAR1	34.8107	34.8011	30.7021	36.0373	31.6536	35.1298	32.9138	34.864	32.159	32.2739	30.1721	33.7164	31.6289	32.4092	31.5115	27.9356	31.8131	30.4947
470	ENSG00000051009	protein_coding	family with sequence similarity 160 member A2 [Source:HGNC Symbol;Acc:HGNC:25378]	FAM160A2	19.4889	17.4574	17.9939	19.0582	18.1564	18.8181	19.1569	18.747	19.6527	18.9553	18.3044	19.2515	18.0578	19.6634	20.85	18.2365	19.2408	21.2347
471	ENSG00000051108	protein_coding	homocysteine inducible ER protein with ubiquitin like domain 1 [Source:HGNC Symbol;Acc:HGNC:13744]	HERPUD1	44.491	40.9425	37.2249	33.0342	34.9199	33.0474	41.3994	47.3395	41.8688	36.5923	36.9441	33.506	19.3873	22.06	18.7435	20.3274	19.7505	20.3794
472	ENSG00000051128	protein_coding	homer scaffold protein 3 [Source:HGNC Symbol;Acc:HGNC:17514]	HOMER3	5.89795	8.1885	6.74771	7.73878	5.95607	6.16988	6.68562	7.55274	7.53483	7.09118	5.49804	6.62756	6.25932	7.18993	6.57743	7.49208	6.54101	6.58239
473	ENSG00000051180	protein_coding	RAD51 recombinase [Source:HGNC Symbol;Acc:HGNC:9817]	RAD51	52.3122	50.6095	52.4072	50.071	52.0676	52.5597	52.4564	50.7787	53.2875	52.8202	47.9402	48.4969	40.4363	39.1633	41.1412	41.8163	38.0143	39.3828
474	ENSG00000051341	protein_coding	DNA polymerase theta [Source:HGNC Symbol;Acc:HGNC:9186]	POLQ	95.5852	98.0914	95.0303	91.1905	95.9696	88.4993	98.87	92.8583	91.0394	96.0491	98.3612	93.4697	72.5084	78.6535	81.7665	82.2967	73.0979	78.9143
475	ENSG00000051382	protein_coding	phosphatidylinositol-4,5-bisphosphate 3-kinase catalytic subunit beta [Source:HGNC Symbol;Acc:HGNC:8976]	PIK3CB	24.1688	24.9067	24.4042	24.3136	23.488	25.9135	25.3282	24.6813	23.1482	25.0919	25.2105	23.7751	21.6029	22.8226	22.0967	23.5797	22.8935	21.6066
476	ENSG00000051523	protein_coding	cytochrome b-245 alpha chain [Source:HGNC Symbol;Acc:HGNC:2577]	CYBA	11.4754	10.6905	10.9088	12.9365	11.768	12.147	11.1213	10.9245	10.4089	10.8186	12.8064	13.7811	9.25049	9.04189	9.45774	8.94403	9.59914	9.52029
477	ENSG00000051596	protein_coding	THO complex 3 [Source:HGNC Symbol;Acc:HGNC:19072]	THOC3	11.0266	10.8043	9.78418	13.2252	8.98214	10.9515	9.77129	10.7896	10.1759	10.0458	11.0631	11.0985	7.53334	8.49719	10.1886	7.434	8.66471	8.88809
478	ENSG00000051825	protein_coding	M-phase phosphoprotein 9 [Source:HGNC Symbol;Acc:HGNC:7215]	MPHOSPH9	108.984	107.076	109.369	103.954	110.427	98.911	112.177	106.278	99.351	114.823	105.2	103.306	109.566	117.436	114.869	113.717	108.691	112.049
479	ENSG00000052126	protein_coding	pleckstrin homology domain containing A5 [Source:HGNC Symbol;Acc:HGNC:30036]	PLEKHA5	18.7837	15.5809	19.1185	17.3256	18.1084	16.9672	15.1069	15.3752	14.2929	17.5007	17.2316	17.6209	24.9265	25.4916	26.1807	25.9609	25.2721	25.5114
480	ENSG00000052723	protein_coding	suppressor of IKBKE 1 [Source:HGNC Symbol;Acc:HGNC:26119]	SIKE1	74.2372	72.7867	78.2735	76.868	79.014	76.121	80.7417	73.3021	77.5233	78.6848	78.984	72.272	78.0476	79.3071	80.0469	75.8501	82.3573	77.873
481	ENSG00000052749	protein_coding	ribosomal RNA processing 12 homolog [Source:HGNC Symbol;Acc:HGNC:29100]	RRP12	96.8032	95.7031	96.661	97.7742	94.0963	96.9829	95.3343	97.0393	101.604	95.3672	102.25	94.2587	79.377	76.965	79.2731	82.471	79.8513	80.7737
482	ENSG00000052795	protein_coding	folliculin interacting protein 2 [Source:HGNC Symbol;Acc:HGNC:29280]	FNIP2	48.4016	50.0977	49.6519	46.0284	48.5612	47.8552	48.7921	49.1603	50.3358	52.3202	48.6777	46.3404	43.4829	45.046	42.0439	44.0232	42.8564	44.1057
483	ENSG00000052802	protein_coding	methylsterol monooxygenase 1 [Source:HGNC Symbol;Acc:HGNC:10545]	MSMO1	52.3122	53.4527	51.1702	58.9649	58.8882	59.6165	53.3564	56.4433	54.0643	58.5931	57.3271	59.1747	46.474	47.8239	42.0869	50.7022	48.8452	50.8741
484	ENSG00000052841	protein_coding	tetratricopeptide repeat domain 17 [Source:HGNC Symbol;Acc:HGNC:25596]	TTC17	114.946	114.184	117.916	112.501	115.375	113.642	120.663	108.436	108.672	116.732	117.537	114.141	136.209	135.737	141.651	137.413	130.268	132.131
485	ENSG00000053254	protein_coding	forkhead box N3 [Source:HGNC Symbol;Acc:HGNC:1928]	FOXN3	193.35	192.259	190.173	195.144	190.114	200.444	197.611	184.84	188.681	191.78	191.56	191.621	236.857	233.4	236.572	251.13	237.133	234.103
486	ENSG00000053371	protein_coding	aldo-keto reductase family 7 member A2 [Source:HGNC Symbol;Acc:HGNC:389]	AKR7A2	20.6428	21.1536	18.8936	21.1373	21.903	20.939	19.5426	19.2865	22.9152	21.9099	20.45	23.4595	20.4397	21.4064	18.8725	20.4435	20.3876	20.0075
487	ENSG00000053372	protein_coding	MRT4 homolog, ribosome maturation factor [Source:HGNC Symbol;Acc:HGNC:18477]	MRTO4	85.392	81.0889	76.3054	85.7618	80.1668	79.6301	78.6846	86.8566	87.5438	82.2758	81.733	80.3724	74.2255	71.4091	62.765	71.2619	69.4876	69.0593
488	ENSG00000053438	protein_coding	neuronatin [Source:HGNC Symbol;Acc:HGNC:7860]	NNAT	128.088	128.514	123.708	129.653	120.803	135.892	125.42	131.431	131.898	121.823	127.729	125.661	103.473	110.681	97.9306	109.071	107.757	103.496
489	ENSG00000053501	protein_coding	unconventional SNARE in the ER 1 [Source:HGNC Symbol;Acc:HGNC:30882]	USE1	11.283	11.2592	10.9088	10.7996	10.9034	11.2215	11.2498	10.9245	11.2634	10.5004	10.6608	10.3095	13.4049	12.1466	11.6502	11.5576	12.1051	10.8219
490	ENSG00000053524	protein_coding	MCF.2 cell line derived transforming sequence-like 2 [Source:HGNC Symbol;Acc:HGNC:30319]	MCF2L2	6.98778	7.84731	7.42248	6.46823	7.34902	6.74831	7.19989	5.19251	6.9134	7.04572	9.38689	7.46916	6.70245	8.06144	7.82413	8.71172	7.47544	7.73524
491	ENSG00000053770	protein_coding	adaptor related protein complex 5 subunit mu 1 [Source:HGNC Symbol;Acc:HGNC:20192]	AP5M1	78.276	77.5633	78.7233	73.2296	73.9225	73.4602	74.3775	70.5372	76.6688	75.8665	79.3863	74.0078	71.8436	69.4482	75.232	68.5903	73.6501	71.9228
492	ENSG00000053900	protein_coding	anaphase promoting complex subunit 4 [Source:HGNC Symbol;Acc:HGNC:19990]	ANAPC4	38.4008	36.6777	37.506	36.0373	37.4656	36.1709	39.2137	36.1453	33.8679	35.9559	33.5917	38.1874	36.0603	35.6773	38.0889	33.3949	37.8869	37.1143
493	ENSG00000053918	protein_coding	potassium voltage-gated channel subfamily Q member 1 [Source:HGNC Symbol;Acc:HGNC:6294]	KCNQ1	11.4754	13.3063	13.158	13.2252	14.1216	13.4195	13.1784	13.0824	13.3607	13.0005	12.0018	13.7285	12.7956	13.5628	11.4353	12.8353	12.6998	11.826
494	ENSG00000054116	protein_coding	trafficking protein particle complex 3 [Source:HGNC Symbol;Acc:HGNC:19942]	TRAPPC3	32.1182	30.3088	31.5456	31.9369	31.3654	31.8906	30.2781	32.7061	33.8679	33.4104	30.1051	31.0864	34.1216	28.8687	28.5022	32.5818	31.0486	30.9038
495	ENSG00000054118	protein_coding	thyroid hormone receptor associated protein 3 [Source:HGNC Symbol;Acc:HGNC:22964]	THRAP3	255.15	251.683	258.156	252.319	258.897	258.017	268.903	250.117	246.707	249.555	252.239	251.427	259.623	255.842	252.651	283.712	269.286	267.498
496	ENSG00000054148	protein_coding	phosphohistidine phosphatase 1 [Source:HGNC Symbol;Acc:HGNC:30033]	PHPT1	35.7723	32.4697	33.5699	40.5419	31.4135	36.2481	29.7639	33.9873	33.2465	32.774	34.2621	34.4528	30.7427	29.5223	28.3302	29.3295	27.8205	31.3128
497	ENSG00000054267	protein_coding	AT-rich interaction domain 4B [Source:HGNC Symbol;Acc:HGNC:15550]	ARID4B	130.909	127.718	131.299	127.459	134.252	117.421	122.912	117.472	114.498	126.187	128.198	128.922	138.924	153.821	156.784	137.878	145.771	145.184
498	ENSG00000054277	protein_coding	opsin 3 [Source:HGNC Symbol;Acc:HGNC:14007]	OPN3	33.3362	36.2227	33.5136	35.1133	35.2561	36.4794	35.4852	36.0778	37.9072	34.1377	37.8828	33.3482	30.0779	28.8687	29.7059	27.9356	26.9286	30.4575
499	ENSG00000054282	protein_coding	SHH signaling and ciliogenesis regulator SDCCAG8 [Source:HGNC Symbol;Acc:HGNC:10671]	SDCCAG8	38.0161	39.9189	40.8237	38.0586	40.8759	36.5566	43.3279	40.9332	38.5286	39.8651	36.4748	38.6608	38.0544	37.039	40.4533	42.7455	38.3116	39.0481
500	ENSG00000054356	protein_coding	protein tyrosine phosphatase receptor type N [Source:HGNC Symbol;Acc:HGNC:9676]	PTPRN	78.0196	79.5535	79.1732	86.2238	77.3809	77.9719	78.8131	84.3615	79.5429	80.5485	81.2636	83.581	77.6598	82.1395	83.873	78.057	83.8863	77.9846
501	ENSG00000054392	protein_coding	hedgehog acyltransferase [Source:HGNC Symbol;Acc:HGNC:18270]	HHAT	29.7462	31.3324	28.5653	28.1253	31.8458	28.4972	32.271	30.6156	31.5375	30.2284	31.8484	30.9812	35.6726	37.2569	36.1973	34.4984	35.4234	37.3746
502	ENSG00000054523	protein_coding	kinesin family member 1B [Source:HGNC Symbol;Acc:HGNC:16636]	KIF1B	370.352	365.469	362.577	355.81	365.29	362.712	369.573	364.959	371.382	356.968	360.39	366.62	407.908	409.499	404.275	407.592	386.684	386.093
503	ENSG00000054598	protein_coding	forkhead box C1 [Source:HGNC Symbol;Acc:HGNC:3800]	FOXC1	63.0824	65.2237	50.889	61.2172	56.6307	60.0407	54.0635	61.8381	62.2983	58.2749	52.9018	58.9117	39.1623	41.2332	32.7582	41.4097	33.3846	38.7878
504	ENSG00000054611	protein_coding	TBC1 domain family member 22A [Source:HGNC Symbol;Acc:HGNC:1309]	TBC1D22A	23.143	21.0399	20.9741	19.4624	20.9903	20.6691	17.614	19.5562	22.4491	20.4099	18.9079	18.0943	20.5505	23.0405	22.5696	21.9535	20.9822	22.5735
505	ENSG00000054654	protein_coding	spectrin repeat containing nuclear envelope protein 2 [Source:HGNC Symbol;Acc:HGNC:17084]	SYNE2	616.463	607.769	439.951	594.673	612.514	588.838	577.084	492.951	502.425	533.838	614.037	651.29	627.483	716.379	757.78	665.692	696.363	711.493
506	ENSG00000054690	protein_coding	pleckstrin homology, MyTH4 and FERM domain containing H1 [Source:HGNC Symbol;Acc:HGNC:17733]	PLEKHH1	16.604	14.7848	16.6444	16.5171	16.7154	16.8515	17.9355	17.668	15.7688	17.5916	15.4213	15.1487	17.3931	19.3366	19.8183	19.5143	21.237	18.5199
507	ENSG00000054793	protein_coding	ATPase phospholipid transporting 9A (putative) [Source:HGNC Symbol;Acc:HGNC:13540]	ATP9A	143.987	147.734	141.59	141.666	138.959	147.422	141.555	146.267	144.638	138.914	143.016	139.705	143.133	140.748	139.416	135.264	154.988	138.081
508	ENSG00000054965	protein_coding	family with sequence similarity 168 member A [Source:HGNC Symbol;Acc:HGNC:28999]	FAM168A	165.912	163.031	159.583	166.615	161.775	167.937	163.605	161.777	169.262	163.052	157.096	163.217	163.85	166.349	164.35	164.129	164.545	162.961
509	ENSG00000054967	protein_coding	RELT TNF receptor [Source:HGNC Symbol;Acc:HGNC:13764]	RELT	18.4631	18.2535	18.8374	19.1737	19.2131	18.8567	16.9712	20.6352	19.8081	20.0462	18.7738	18.7781	14.0142	16.8854	12.639	14.2291	13.1245	12.9788
510	ENSG00000054983	protein_coding	galactosylceramidase [Source:HGNC Symbol;Acc:HGNC:4115]	GALC	30.1308	29.5696	29.2963	26.3349	32.23	26.4148	28.6067	31.6271	35.4215	30.2739	31.2449	28.0357	34.177	34.8058	34.0909	34.8469	34.2341	34.5483
511	ENSG00000055044	protein_coding	NOP58 ribonucleoprotein [Source:HGNC Symbol;Acc:HGNC:29926]	NOP58	127.767	132.381	131.749	127.517	137.47	119.773	135.641	125.429	119.081	134.323	126.723	124.293	117.044	119.56	125.229	122.371	123.047	123.838
512	ENSG00000055070	protein_coding	SUZ RNA binding domain containing 1 [Source:HGNC Symbol;Acc:HGNC:30232]	SZRD1	155.59	153.477	147.156	157.086	149.382	157.91	152.869	155.168	158.62	151.778	157.7	157.747	141.139	141.13	132.623	142.117	136.682	136.371
513	ENSG00000055118	protein_coding	potassium voltage-gated channel subfamily H member 2 [Source:HGNC Symbol;Acc:HGNC:6251]	KCNH2	234.572	222.056	202.375	236.61	211.248	214.982	202.24	220.985	222.549	212.872	203.628	217.552	164.681	166.349	152.485	158.844	159.15	161.994
514	ENSG00000055130	protein_coding	cullin 1 [Source:HGNC Symbol;Acc:HGNC:2551]	CUL1	138.922	138.693	142.096	132.772	137.902	137.434	142.648	142.019	140.909	139.278	136.11	134.234	131.335	126.586	128.582	126.901	130.438	126.627
515	ENSG00000055147	protein_coding	family with sequence similarity 114 member A2 [Source:HGNC Symbol;Acc:HGNC:1333]	FAM114A2	26.3484	29.1147	30.5334	28.5295	27.859	27.6874	29.121	28.5251	30.2947	28.592	28.2277	26.3525	29.524	31.0474	27.7714	27.5871	31.4733	30.16
516	ENSG00000055163	protein_coding	cytoplasmic FMR1 interacting protein 2 [Source:HGNC Symbol;Acc:HGNC:13760]	CYFIP2	93.4055	102.243	95.4801	101.239	98.035	103.808	97.97	95.758	95.0787	99.231	99.0317	99.6239	127.901	123.7	121.747	115.053	121.901	126.553
517	ENSG00000055208	protein_coding	TGF-beta activated kinase 1 (MAP3K7) binding protein 2 [Source:HGNC Symbol;Acc:HGNC:17075]	TAB2	97.5725	95.4188	94.1868	93.6738	97.6987	95.3633	90.8344	95.4883	90.2626	93.6854	99.1658	88.7883	110.341	110.355	110.054	103.669	105.081	104.686
518	ENSG00000055211	protein_coding	glycoprotein integral membrane 1 [Source:HGNC Symbol;Acc:HGNC:21074]	GINM1	16.0911	15.8084	15.9696	15.0733	17.8682	16.5044	15.6212	15.3752	19.4197	15.637	17.4998	17.6735	20.5505	18.4651	16.895	18.6431	18.3063	16.8836
519	ENSG00000055332	protein_coding	eukaryotic translation initiation factor 2 alpha kinase 2 [Source:HGNC Symbol;Acc:HGNC:9437]	EIF2AK2	229.635	234.453	238.757	217.841	233.343	220.149	237.725	219.367	227.676	221.599	216.703	233.017	209.438	207.637	212.971	210.069	197.377	208.628
520	ENSG00000055483	protein_coding	ubiquitin specific peptidase 36 [Source:HGNC Symbol;Acc:HGNC:20062]	USP36	85.7125	82.283	92.1625	81.6614	83.6251	84.3346	81.0631	87.1937	85.2135	81.5485	77.0395	87.1577	71.7329	76.8016	78.2843	77.1859	75.6464	75.4186
521	ENSG00000055609	protein_coding	lysine methyltransferase 2C [Source:HGNC Symbol;Acc:HGNC:13726]	KMT2C	337.401	335.046	308.314	327.396	329.889	316.746	321.038	316.204	308.073	332.694	309.298	325.908	352.183	355.303	360.813	351.779	348.84	350.615
522	ENSG00000055917	protein_coding	pumilio RNA binding family member 2 [Source:HGNC Symbol;Acc:HGNC:14958]	PUM2	392.983	386.338	387.6	379.604	392.14	385.772	387.573	395.238	385.364	387.787	381.041	382.873	392.62	394.194	382.866	372.049	393.692	385.014
523	ENSG00000055950	protein_coding	mitochondrial ribosomal protein L43 [Source:HGNC Symbol;Acc:HGNC:14517]	MRPL43	34.4261	33.7776	33.5136	35.8063	32.3261	35.7082	30.8567	30.8179	32.392	30.7739	33.1223	34.032	31.9059	34.2067	33.446	36.7054	38.3116	37.3746
524	ENSG00000056050	protein_coding	histone PARylation factor 1 [Source:HGNC Symbol;Acc:HGNC:26051]	HPF1	43.7217	42.9328	43.3541	41.1772	44.9107	42.0323	49.7564	41.2703	42.8009	46.3654	43.8502	43.8682	43.4275	41.6689	42.8608	42.5713	45.15	42.8041
525	ENSG00000056097	protein_coding	zinc finger RNA binding protein [Source:HGNC Symbol;Acc:HGNC:17277]	ZFR	176.233	170.253	172.01	162.976	169.268	169.363	168.619	165.419	158.387	165.188	166.416	165.531	165.013	165.913	164.307	169.007	164.035	163.221
526	ENSG00000056277	protein_coding	zinc finger protein 280C [Source:HGNC Symbol;Acc:HGNC:25955]	ZNF280C	36.8622	34.3462	35.6504	33.9005	35.16	34.2429	40.3708	37.8986	37.2857	43.6835	40.2295	34.4002	37.1681	39.1633	39.3356	49.2503	38.9912	38.8249
527	ENSG00000056291	protein_coding	neuropeptide FF receptor 2 [Source:HGNC Symbol;Acc:HGNC:4525]	NPFFR2	17.181	16.0358	16.2507	16.6903	16.8115	16.543	18.3212	17.6006	17.167	18.2734	18.3715	16.2007	16.1191	15.8505	16.5081	16.5523	15.5455	15.173
528	ENSG00000056487	protein_coding	PHD finger protein 21B [Source:HGNC Symbol;Acc:HGNC:25161]	PHF21B	173.22	172.3	174.878	171.812	160.478	171.407	170.098	184.84	178.272	163.643	167.824	174.631	176.812	180.239	176	187.36	180.727	178.32
529	ENSG00000056586	protein_coding	ring finger and CCCH-type domains 2 [Source:HGNC Symbol;Acc:HGNC:21461]	RC3H2	203.864	203.803	196.696	192.141	203.083	197.244	202.561	195.36	192.41	196.78	199.203	195.355	203.843	213.737	197.409	190.322	194.786	203.496
530	ENSG00000056736	protein_coding	interleukin 17 receptor B [Source:HGNC Symbol;Acc:HGNC:18015]	IL17RB	4.93632	5.74332	5.34194	6.81474	6.77263	6.59406	5.78563	6.00173	5.12679	5.8184	6.83902	5.31257	3.37892	3.7039	3.39619	3.77508	3.01566	3.90481
531	ENSG00000056972	protein_coding	TRAF3 interacting protein 2 [Source:HGNC Symbol;Acc:HGNC:1343]	TRAF3IP2	1.15395	1.36475	1.12462	2.02132	1.48902	1.19542	2.18568	1.41614	1.86429	1.77279	1.74328	1.31499	1.77255	2.45111	2.36443	2.03274	2.63339	2.23132
532	ENSG00000057019	protein_coding	discoidin, CUB and LCCL domain containing 2 [Source:HGNC Symbol;Acc:HGNC:24627]	DCBLD2	85.5202	84.8988	88.7324	89.0537	86.6512	86.8411	88.263	85.1032	86.6894	87.776	85.7559	85.3167	85.6363	88.2401	88.5588	84.2133	85.6278	84.3067
533	ENSG00000057252	protein_coding	sterol O-acyltransferase 1 [Source:HGNC Symbol;Acc:HGNC:11177]	SOAT1	45.645	44.3544	46.8404	42.0435	46.0154	43.4977	46.285	48.2836	45.2866	47.6836	43.2467	42.3428	31.4074	33.7164	31.5974	29.7941	30.5389	33.3582
534	ENSG00000057608	protein_coding	GDP dissociation inhibitor 2 [Source:HGNC Symbol;Acc:HGNC:4227]	GDI2	266.305	267.775	272.045	261.559	279.071	267.156	279.06	276.754	280.964	257.055	271.683	256.108	290.2	278.664	280.594	264.72	286.658	285.795
535	ENSG00000057663	protein_coding	autophagy related 5 [Source:HGNC Symbol;Acc:HGNC:589]	ATG5	21.7326	20.8693	22.9422	21.5993	23.8243	22.79	23.0139	23.0628	22.9929	23.6373	22.7297	23.0913	21.1598	20.5894	23.2145	20.7339	21.322	21.495
536	ENSG00000057757	protein_coding	PITH domain containing 1 [Source:HGNC Symbol;Acc:HGNC:25022]	PITHD1	43.6576	39.3503	40.7112	41.4082	44.0941	44.1532	43.7136	42.2144	46.1411	43.7744	42.9115	42.5006	41.0456	38.7821	38.3468	37.2281	37.0374	37.5233
537	ENSG00000057935	protein_coding	metastasis associated 1 family member 3 [Source:HGNC Symbol;Acc:HGNC:23784]	MTA3	102.829	102.584	107.682	104.993	104.615	109.438	107.034	104.053	109.76	104.277	104.06	99.4135	125.796	121.194	121.919	133.928	128.994	124.545
538	ENSG00000058056	protein_coding	ubiquitin specific peptidase 13 [Source:HGNC Symbol;Acc:HGNC:12611]	USP13	58.7871	56.6371	53.7005	56.0195	58.2638	56.146	59.7848	58.8709	57.5599	56.8203	54.3099	55.2297	60.2667	62.5306	55.6287	56.1616	57.1276	61.8075
539	ENSG00000058063	protein_coding	ATPase phospholipid transporting 11B (putative) [Source:HGNC Symbol;Acc:HGNC:13553]	ATP11B	73.8525	68.863	70.851	70.4575	68.8791	69.9896	69.9418	62.5799	66.1045	68.0935	74.894	68.6426	81.925	85.4622	91.7831	79.509	86.5197	79.1374
540	ENSG00000058091	protein_coding	cyclin dependent kinase 14 [Source:HGNC Symbol;Acc:HGNC:8883]	CDK14	94.6236	94.5089	91.9376	89.9777	94.5766	92.2398	96.8129	87.8006	97.0206	87.1851	94.7405	89.0513	99.4289	95.9747	94.7064	94.4931	95.4393	94.3476
541	ENSG00000058262	protein_coding	SEC61 translocon subunit alpha 1 [Source:HGNC Symbol;Acc:HGNC:18276]	SEC61A1	265.408	270.05	249.44	266.93	254.526	256.359	255.661	274.798	262.631	262.783	247.747	263.577	213.426	217.278	197.538	196.304	215.046	213.277
542	ENSG00000058272	protein_coding	protein phosphatase 1 regulatory subunit 12A [Source:HGNC Symbol;Acc:HGNC:7618]	PPP1R12A	87.5076	84.6714	88.9573	83.394	87.9961	81.134	86.0773	82.4733	78.6885	86.2305	86.4935	86.5265	85.1378	85.1898	89.7625	85.8395	90.6397	89.9965
543	ENSG00000058404	protein_coding	calcium/calmodulin dependent protein kinase II beta [Source:HGNC Symbol;Acc:HGNC:1461]	CAMK2B	12.8857	12.8514	13.0456	14.1493	15.3225	12.3783	13.0498	14.1614	13.6714	13.3641	12.6053	13.4655	13.1833	14.9246	14.7025	13.7064	14.1439	13.5739
544	ENSG00000058453	protein_coding	ciliary rootlet coiled-coil, rootletin [Source:HGNC Symbol;Acc:HGNC:21299]	CROCC	63.7876	71.5356	77.0364	75.5397	70.7043	70.3367	69.8776	69.9303	72.9402	74.0028	65.1718	72.4298	66.1936	74.6228	76.1348	78.1151	70.507	69.4312
545	ENSG00000058600	protein_coding	RNA polymerase III subunit E [Source:HGNC Symbol;Acc:HGNC:30347]	POLR3E	64.621	65.9629	66.6899	64.9133	64.7963	68.2544	66.2133	67.9073	61.8322	69.139	62.2217	62.5411	60.9314	63.62	63.7968	66.3833	66.8117	66.0842
546	ENSG00000058668	protein_coding	ATPase plasma membrane Ca2+ transporting 4 [Source:HGNC Symbol;Acc:HGNC:817]	ATP2B4	51.8635	51.6899	52.2385	55.2687	56.8228	55.5675	53.4206	53.5436	53.6759	57.684	58.534	57.8071	66.1936	62.4762	67.1929	62.5502	66.1746	63.9645
547	ENSG00000058729	protein_coding	RIO kinase 2 [Source:HGNC Symbol;Acc:HGNC:18999]	RIOK2	24.6816	25.4753	25.9787	24.4869	24.6889	22.2501	25.0711	24.2767	22.2938	25.5464	25.881	23.4595	23.1539	21.8966	25.063	21.2566	22.0865	21.0116
548	ENSG00000058799	protein_coding	Yip1 domain family member 1 [Source:HGNC Symbol;Acc:HGNC:25231]	YIPF1	13.0139	12.7945	13.383	11.7237	13.4012	12.5326	13.8855	12.3406	13.8268	13.5914	14.7508	14.0967	12.4632	11.9288	10.7904	10.8025	10.8309	11.6772
549	ENSG00000058804	protein_coding	NDC1 transmembrane nucleoporin [Source:HGNC Symbol;Acc:HGNC:25525]	NDC1	158.475	156.833	154.579	150.733	162.015	160.186	165.983	166.16	173.223	155.779	170.506	156.432	154.378	151.424	146.423	153.326	152.822	160.432
550	ENSG00000059122	protein_coding	FLYWCH-type zinc finger 1 [Source:HGNC Symbol;Acc:HGNC:25404]	FLYWCH1	26.5408	29.9108	28.0592	29.0493	27.763	30.5024	26.0353	29.9412	31.6152	28.8647	30.7756	28.2986	27.2529	26.5265	29.8779	28.8068	26.0366	27.1849
551	ENSG00000059145	protein_coding	unk like zinc finger [Source:HGNC Symbol;Acc:HGNC:14184]	UNKL	24.8739	22.689	23.7295	25.5842	21.903	25.2965	25.2639	24.4115	24.4688	23.7736	24.473	23.8803	23.1539	24.729	22.7416	22.0116	23.021	24.3214
552	ENSG00000059377	protein_coding	thromboxane A synthase 1 [Source:HGNC Symbol;Acc:HGNC:11609]	TBXAS1	4.67989	4.89035	5.34194	5.19769	3.74656	4.70454	4.56422	4.24842	3.96161	4.86382	3.8218	4.62878	2.93579	3.81284	4.42794	3.42661	3.99256	3.942
553	ENSG00000059573	protein_coding	aldehyde dehydrogenase 18 family member A1 [Source:HGNC Symbol;Acc:HGNC:9722]	ALDH18A1	108.984	102.356	101.216	103.838	105.672	101.726	101.377	104.39	109.76	101.186	104.865	104.779	93.0035	97.282	91.5251	89.4403	89.2381	92.3766
554	ENSG00000059588	protein_coding	TAR (HIV-1) RNA binding protein 1 [Source:HGNC Symbol;Acc:HGNC:11568]	TARBP1	105.714	108.043	118.141	114.291	126.614	108.783	113.463	119.698	110.692	122.277	108.284	114.878	128.842	135.574	140.791	131.547	140.419	141.875
555	ENSG00000059691	protein_coding	glutamyl-tRNA amidotransferase subunit B [Source:HGNC Symbol;Acc:HGNC:8849]	GATB	33.9132	35.8247	31.6018	29.6846	31.5095	32.7775	32.0138	35.1337	33.8679	32.9103	31.1779	34.6106	32.0721	32.3002	31.9414	33.9757	32.7475	32.8748
556	ENSG00000059728	protein_coding	MAX dimerization protein 1 [Source:HGNC Symbol;Acc:HGNC:6761]	MXD1	14.9372	13.9318	16.1383	13.8605	14.4098	16.2731	16.8426	15.9147	16.3125	14.8642	15.4213	14.7805	15.8422	12.9092	14.6595	15.9134	15.2057	14.6523
557	ENSG00000059758	protein_coding	cyclin dependent kinase 17 [Source:HGNC Symbol;Acc:HGNC:8750]	CDK17	28.3358	27.295	26.8784	26.4504	24.881	25.8364	25.6496	27.581	26.5661	26.9556	27.6913	27.1415	30.2995	27.1801	27.6854	31.4203	32.0679	28.784
558	ENSG00000059769	protein_coding	DnaJ heat shock protein family (Hsp40) member C25 [Source:HGNC Symbol;Acc:HGNC:34187]	DNAJC25	13.655	13.022	10.7401	9.7601	11.0956	10.5274	11.7641	10.0478	10.0982	10.9095	10.1915	12.7291	10.5245	9.80445	10.0166	10.4541	9.08945	10.45
559	ENSG00000059915	protein_coding	pleckstrin and Sec7 domain containing [Source:HGNC Symbol;Acc:HGNC:9507]	PSD	31.9258	32.4697	37.6185	36.9036	33.7671	32.9318	34.0066	35.2012	36.1982	34.0013	32.5859	38.3978	28.25	32.9539	32.5432	31.1299	27.1409	29.8997
560	ENSG00000060069	protein_coding	CTD phosphatase subunit 1 [Source:HGNC Symbol;Acc:HGNC:2498]	CTDP1	31.2848	31.503	28.3966	30.2043	29.204	29.6154	30.4067	31.0876	31.9259	27.2738	26.9538	30.2448	26.0343	27.6159	25.9658	26.8321	25.3995	26.999
561	ENSG00000060237	protein_coding	WNK lysine deficient protein kinase 1 [Source:HGNC Symbol;Acc:HGNC:14540]	WNK1	366.057	372.975	370	366.783	364.377	355.848	376.902	361.52	354.603	350.286	353.752	358.94	380.71	385.751	379.986	384.013	365.32	359.949
562	ENSG00000060339	protein_coding	cell division cycle and apoptosis regulator 1 [Source:HGNC Symbol;Acc:HGNC:24236]	CCAR1	164.758	162.292	168.637	155.815	163.36	147.345	163.283	147.279	137.957	157.961	155.085	155.38	166.786	163.299	176.645	169.588	167.688	169.06
563	ENSG00000060491	protein_coding	opioid growth factor receptor [Source:HGNC Symbol;Acc:HGNC:15768]	OGFR	40.3881	39.9758	42.5106	42.2745	43.2295	42.3408	40.628	40.6634	44.0438	41.0015	37.9499	40.8174	36.2819	38.9999	38.9917	36.5312	38.7788	35.2548
564	ENSG00000060642	protein_coding	phosphatidylinositol glycan anchor biosynthesis class V [Source:HGNC Symbol;Acc:HGNC:26031]	PIGV	11.9882	12.6239	13.2705	12.5899	14.1216	12.8411	12.9855	12.0035	14.2929	13.1369	13.0075	13.9915	15.8422	13.236	13.9717	14.9842	13.7616	13.5739
565	ENSG00000060656	protein_coding	protein tyrosine phosphatase receptor type U [Source:HGNC Symbol;Acc:HGNC:9683]	PTPRU	44.6192	43.3877	39.4179	42.4478	41.9326	43.8062	40.0494	43.4283	44.0438	41.2743	44.7889	44.8676	41.2672	39.3812	41.4851	40.5385	42.0069	38.8621
566	ENSG00000060688	protein_coding	small nuclear ribonucleoprotein U5 subunit 40 [Source:HGNC Symbol;Acc:HGNC:30857]	SNRNP40	65.6467	67.0433	65.734	62.7187	64.412	68.1772	63.1277	71.9534	66.2599	66.7298	64.6354	62.3307	57.2755	53.5977	53.5222	57.7297	58.8691	58.8696
567	ENSG00000060709	protein_coding	RIMS binding protein 2 [Source:HGNC Symbol;Acc:HGNC:30339]	RIMBP2	260.022	262.999	260.181	265.197	253.037	243.98	245.696	252.41	251.912	250.509	233.666	257.686	230.819	247.072	240.356	239.224	228.298	234.809
568	ENSG00000060749	protein_coding	glutamine and serine rich 1 [Source:HGNC Symbol;Acc:HGNC:26154]	QSER1	261.176	266.581	258.325	250.124	263.7	253.968	249.875	242.969	246.785	255.373	270.946	252.373	272.862	295.659	297.145	261.003	272.471	270.399
569	ENSG00000060762	protein_coding	mitochondrial pyruvate carrier 1 [Source:HGNC Symbol;Acc:HGNC:21606]	MPC1	20.0658	20.2438	17.3191	19.809	20.462	19.1652	20.9568	21.7141	23.0706	18.5462	19.7125	19.5145	18.8333	14.979	16.895	18.4688	16.5649	17.8505
570	ENSG00000060971	protein_coding	acetyl-CoA acyltransferase 1 [Source:HGNC Symbol;Acc:HGNC:82]	ACAA1	18.399	17.7986	17.9377	18.4807	17.6761	17.0443	16.0069	18.1401	16.3902	16.137	17.701	18.6203	17.5039	16.2863	15.1324	18.7592	17.9665	17.6646
571	ENSG00000060982	protein_coding	branched chain amino acid transaminase 1 [Source:HGNC Symbol;Acc:HGNC:976]	BCAT1	353.941	364.673	344.696	337.85	366.25	343.277	359.995	340.346	344.738	343.058	357.64	343.792	328.586	332.698	319.844	305.433	336.735	330.012
572	ENSG00000061273	protein_coding	histone deacetylase 7 [Source:HGNC Symbol;Acc:HGNC:14067]	HDAC7	46.286	50.7801	53.1945	54.7489	49.5699	51.9042	47.3136	52.06	46.6849	49.411	47.4038	55.2823	47.5819	47.3882	49.6101	49.2503	51.3512	51.9897
573	ENSG00000061337	protein_coding	leucine zipper tumor suppressor 1 [Source:HGNC Symbol;Acc:HGNC:13861]	LZTS1	18.9119	21.0399	21.8738	22.2345	20.6541	23.1371	20.2497	21.377	23.4589	21.3644	18.9079	20.1457	15.5652	15.8505	14.9174	17.7138	16.6923	16.4374
574	ENSG00000061656	protein_coding	sperm associated antigen 4 [Source:HGNC Symbol;Acc:HGNC:11214]	SPAG4	3.39773	3.24128	3.76747	4.79342	3.74656	4.01043	3.98566	4.92277	3.72857	4.00015	4.3582	3.94498	3.76667	3.32262	4.25598	2.67159	3.95009	4.46264
575	ENSG00000061676	protein_coding	NCK associated protein 1 [Source:HGNC Symbol;Acc:HGNC:7666]	NCKAP1	217.839	218.246	212.103	208.427	222.584	217.45	217.604	207.498	206.781	216.099	220.994	212.555	230.154	227.518	222.515	221.742	230.21	230.904
576	ENSG00000061794	protein_coding	mitochondrial ribosomal protein S35 [Source:HGNC Symbol;Acc:HGNC:16635]	MRPS35	41.9908	41.8523	42.3981	40.8307	43.1815	39.95	42.8779	39.7868	43.1893	42.2743	42.7103	40.3966	43.0397	43.2485	40.4533	39.5512	41.0724	42.2835
577	ENSG00000061918	protein_coding	guanylate cyclase 1 soluble subunit beta 1 [Source:HGNC Symbol;Acc:HGNC:4687]	GUCY1B1	23.2712	26.2146	25.7538	22.8698	25.1212	26.2991	27.5139	24.4115	26.8768	26.8192	27.289	24.9323	19.9966	19.4455	18.6146	20.3274	19.1558	17.4043
578	ENSG00000061936	protein_coding	splicing factor SWAP [Source:HGNC Symbol;Acc:HGNC:10790]	SFSWAP	104.047	107.815	115.723	111.923	101.397	104.849	99.77	102.906	101.681	105.413	99.8363	106.357	104.414	108.503	111.429	117.086	108.606	107.364
579	ENSG00000061938	protein_coding	tyrosine kinase non receptor 2 [Source:HGNC Symbol;Acc:HGNC:19297]	TNK2	47.6323	47.1976	51.9574	49.2048	42.509	44.1532	45.7065	47.1372	48.1608	44.0017	44.5207	46.0774	45.0338	49.567	52.6194	46.9852	49.4823	45.8164
580	ENSG00000061987	protein_coding	MON2 homolog, regulator of endosome-to-Golgi trafficking [Source:HGNC Symbol;Acc:HGNC:29177]	MON2	75.5835	72.6729	72.0318	69.0715	72.6736	71.185	76.6917	68.4467	72.8626	68.8662	71.2733	69.4316	75.9427	79.634	81.2506	72.8881	71.4839	73.3732
581	ENSG00000062194	protein_coding	GC-rich promoter binding protein 1 [Source:HGNC Symbol;Acc:HGNC:29520]	GPBP1	137.448	134.371	136.754	129.307	133.867	133.115	136.798	132.24	128.325	132.369	136.445	132.604	146.346	149.572	144.231	134.567	147.215	145.408
582	ENSG00000062370	protein_coding	zinc finger protein 112 [Source:HGNC Symbol;Acc:HGNC:12892]	ZNF112	20.0017	19.7889	17.5441	18.2496	21.7108	17.6227	18.964	17.4657	17.8661	18.8643	20.6512	19.7249	21.5476	24.3477	23.3004	21.0243	21.9166	22.0529
583	ENSG00000062485	protein_coding	citrate synthase [Source:HGNC Symbol;Acc:HGNC:2422]	CS	191.747	196.467	189.611	192.892	186.367	198.516	190.476	193.404	190.856	188.189	186.799	191.936	185.73	183.343	179.396	180.216	182.129	181.927
584	ENSG00000062598	protein_coding	engulfment and cell motility 2 [Source:HGNC Symbol;Acc:HGNC:17233]	ELMO2	51.9917	50.382	50.9452	52.7854	50.1943	53.4466	51.685	53.611	50.5688	51.4565	50.2869	55.4401	52.2902	51.7457	51.6736	47.9725	49.7796	49.5725
585	ENSG00000062650	protein_coding	WAPL cohesin release factor [Source:HGNC Symbol;Acc:HGNC:23293]	WAPL	123.344	124.249	125.451	117.525	122.051	121.624	120.47	116.123	117.45	122.686	125.382	122.663	128.787	133.177	130.517	130.85	129.758	127.966
586	ENSG00000062716	protein_coding	vacuole membrane protein 1 [Source:HGNC Symbol;Acc:HGNC:29559]	VMP1	75.0065	76.9946	76.0242	77.8498	72.3374	76.1595	76.4346	72.6277	76.9019	75.5483	78.6487	70.431	67.8	69.6661	67.6228	71.32	71.8237	70.9187
587	ENSG00000062725	protein_coding	amyloid beta precursor protein binding protein 2 [Source:HGNC Symbol;Acc:HGNC:622]	APPBP2	130.396	136.418	127.082	122.723	131.418	128.334	132.619	127.655	125.762	128.232	133.964	131.289	141.084	141.456	141.35	131.431	132.137	134.511
588	ENSG00000062822	protein_coding	DNA polymerase delta 1, catalytic subunit [Source:HGNC Symbol;Acc:HGNC:9175]	POLD1	86.4818	88.8793	90.8692	103.376	86.5551	96.9058	82.0917	91.105	89.5635	86.4124	88.572	95.7841	73.6716	74.6773	72.8676	75.9081	73.8624	74.6004
589	ENSG00000063015	protein_coding	seizure related 6 homolog [Source:HGNC Symbol;Acc:HGNC:15955]	SEZ6	38.8495	37.5306	34.0197	37.1923	33.0946	35.901	37.5423	39.6519	35.7322	36.6832	34.7315	36.5042	23.5971	25.4916	24.5901	25.6125	23.9554	24.9536
590	ENSG00000063046	protein_coding	eukaryotic translation initiation factor 4B [Source:HGNC Symbol;Acc:HGNC:3285]	EIF4B	383.302	396.63	388.837	378.853	393.533	393.176	411.101	387.078	377.207	395.879	402.094	376.667	531.1	506.073	517.768	537.049	531.096	515.435
591	ENSG00000063169	protein_coding	BRD4 interacting chromatin remodeling complex associated protein [Source:HGNC Symbol;Acc:HGNC:4332]	BICRA	34.8748	33.3226	32.4453	38.6361	31.8938	34.6285	32.5924	32.3015	36.742	30.6375	28.1607	34.6632	34.5093	33.8798	37.0571	33.9757	33.7244	32.6888
592	ENSG00000063176	protein_coding	sphingosine kinase 2 [Source:HGNC Symbol;Acc:HGNC:18859]	SPHK2	19.2324	21.6654	19.7933	22.6388	20.2698	21.1319	18.5783	20.4329	22.0607	19.2735	21.0535	19.5671	17.6147	17.648	17.1959	20.3274	17.1171	17.6274
593	ENSG00000063177	protein_coding	ribosomal protein L18 [Source:HGNC Symbol;Acc:HGNC:10310]	RPL18	398.304	414.941	380.627	436.548	404.628	429.81	391.687	396.991	420.241	398.561	425.964	418.431	437.1	414.347	407.371	410.38	441.858	423.913
594	ENSG00000063180	protein_coding	carbonic anhydrase 11 [Source:HGNC Symbol;Acc:HGNC:1370]	CA11	8.52638	9.09833	9.33434	9.35583	10.279	8.6764	9.12844	11.5314	10.2536	10.0004	10.6608	9.99395	11.0784	9.96786	12.725	12.2545	11.6379	11.6029
595	ENSG00000063241	protein_coding	isochorismatase domain containing 2 [Source:HGNC Symbol;Acc:HGNC:26278]	ISOC2	19.8094	20.1301	18.4437	20.6752	18.4926	19.975	18.964	20.7026	21.3616	20.0008	19.6454	20.1457	14.0696	16.6131	13.7137	14.2291	15.5455	15.0242
596	ENSG00000063244	protein_coding	U2 small nuclear RNA auxiliary factor 2 [Source:HGNC Symbol;Acc:HGNC:23156]	U2AF2	267.844	254.298	258.606	269.702	246.6	262.297	249.811	257.13	262.865	250.737	254.854	261.052	225.834	224.304	217.055	226.272	220.525	219.971
597	ENSG00000063245	protein_coding	epsin 1 [Source:HGNC Symbol;Acc:HGNC:21604]	EPN1	184.311	179.692	175.272	193.007	169.316	186.138	177.426	180.929	189.614	177.507	175.803	185.993	174.652	169.835	168.047	170.285	172.997	166.605
598	ENSG00000063322	protein_coding	mediator complex subunit 29 [Source:HGNC Symbol;Acc:HGNC:23074]	MED29	57.5691	53.4527	53.1945	51.1106	50.1943	53.7166	52.6492	58.0617	59.0358	54.5021	53.2371	52.9153	54.949	54.0879	48.2345	50.3537	51.691	48.7915
599	ENSG00000063587	protein_coding	zinc finger protein 275 [Source:HGNC Symbol;Acc:HGNC:13069]	ZNF275	31.3489	33.0383	33.0076	29.5691	33.3348	32.2762	30.2781	30.0761	30.7607	29.2284	30.4403	31.6124	35.0632	37.3659	36.3263	37.17	40.0531	39.4572
600	ENSG00000063601	protein_coding	myotubularin related protein 1 [Source:HGNC Symbol;Acc:HGNC:7449]	MTMR1	50.3249	48.3349	50.3829	47.2989	49.9541	47.7009	47.3779	49.6998	50.5688	48.7291	51.2926	48.5495	49.4652	49.7848	46.5579	48.5533	45.4048	46.2999
601	ENSG00000063660	protein_coding	glypican 1 [Source:HGNC Symbol;Acc:HGNC:4449]	GPC1	39.4906	41.0562	37.6185	41.5237	37.6097	41.4154	38.5709	38.3706	42.4125	37.1832	38.6203	42.185	36.5034	36.9301	35.6815	36.7635	37.9718	36.2589
602	ENSG00000063761	protein_coding	aarF domain containing kinase 1 [Source:HGNC Symbol;Acc:HGNC:19038]	ADCK1	7.56476	5.68646	6.46656	6.00621	5.52377	5.2444	5.39992	5.32738	6.44733	6.45479	5.76623	5.89117	5.04069	5.06563	5.07279	6.04013	5.81895	4.98328
603	ENSG00000063854	protein_coding	hydroxyacylglutathione hydrolase [Source:HGNC Symbol;Acc:HGNC:4805]	HAGH	31.1565	27.693	27.1033	28.1253	27.6189	29.3455	27.5782	28.8623	26.5661	29.1829	30.038	28.6142	23.3755	24.5656	23.9023	24.1024	24.3801	23.4288
604	ENSG00000063978	protein_coding	ring finger protein 4 [Source:HGNC Symbol;Acc:HGNC:10067]	RNF4	50.8377	52.5997	51.9574	50.302	50.1943	54.5264	51.5564	52.9366	48.7045	51.411	50.7563	53.5465	54.7829	54.5237	51.2438	62.0275	53.7297	54.4442
605	ENSG00000064042	protein_coding	LIM and calponin homology domains 1 [Source:HGNC Symbol;Acc:HGNC:29191]	LIMCH1	401.958	392.081	385.407	369.267	381.861	381.685	391.301	384.448	366.799	386.06	379.968	373.353	332.741	329.648	323.24	350.734	321.869	340.239
606	ENSG00000064102	protein_coding	integrator complex subunit 13 [Source:HGNC Symbol;Acc:HGNC:20174]	INTS13	35.6441	34.1187	37.1687	33.8427	36.1207	34.0886	34.8423	33.9873	34.0232	34.8195	34.8656	33.9794	33.623	34.2611	33.8759	32.5238	32.6626	31.2385
607	ENSG00000064115	protein_coding	transmembrane 7 superfamily member 3 [Source:HGNC Symbol;Acc:HGNC:23049]	TM7SF3	74.9424	75.9142	76.4741	71.9591	73.5863	73.1517	75.7275	77.6179	80.1644	76.3211	72.279	75.7436	73.5608	72.1717	70.4602	67.603	71.1016	71.6625
608	ENSG00000064199	protein_coding	sperm autoantigenic protein 17 [Source:HGNC Symbol;Acc:HGNC:11210]	SPA17	20.5787	21.9497	24.9103	22.4656	23.2479	20.2835	21.4068	22.1862	21.3616	22.4099	20.1148	22.3023	24.2618	25.4371	24.4182	24.1024	24.2952	25.1767
609	ENSG00000064225	protein_coding	ST3 beta-galactoside alpha-2,3-sialyltransferase 6 [Source:HGNC Symbol;Acc:HGNC:18080]	ST3GAL6	55.0048	56.3528	56.737	55.2687	58.7441	52.097	57.6634	53.5436	54.2197	54.4111	54.1087	53.0731	69.9603	62.0404	73.1685	62.7244	68.1284	70.175
610	ENSG00000064309	protein_coding	cell adhesion associated, oncogene regulated [Source:HGNC Symbol;Acc:HGNC:17104]	CDON	55.133	51.1781	55.1626	50.2443	50.8187	49.1277	54.1921	52.6669	48.1608	53.4566	52.3654	53.4413	50.6838	51.8002	55.8437	58.5428	54.112	52.9194
611	ENSG00000064313	protein_coding	TATA-box binding protein associated factor 2 [Source:HGNC Symbol;Acc:HGNC:11536]	TAF2	75.5193	78.8712	76.699	78.8316	78.1974	74.1157	77.4632	75.0554	73.6394	75.3665	78.5146	72.1142	72.3422	75.9845	75.6189	77.1859	76.4534	74.7492
612	ENSG00000064393	protein_coding	homeodomain interacting protein kinase 2 [Source:HGNC Symbol;Acc:HGNC:14402]	HIPK2	376.379	371.155	368.481	354.886	349.727	344.357	359.288	372.31	365.4	364.968	348.924	338.9	364.425	367.449	358.018	378.379	339.665	334.772
613	ENSG00000064419	protein_coding	transportin 3 [Source:HGNC Symbol;Acc:HGNC:17103]	TNPO3	177.195	170.594	166.725	172.91	169.7	173.914	176.783	178.501	173.845	170.87	172.652	177.208	174.873	170.597	166.198	165.523	168.027	166.754
614	ENSG00000064490	protein_coding	regulatory factor X associated ankyrin containing protein [Source:HGNC Symbol;Acc:HGNC:9987]	RFXANK	16.8604	15.8652	17.1504	18.0764	17.2438	18.7025	17.7426	15.1729	16.1572	17.0461	16.293	17.5157	15.5098	16.722	15.2614	17.0169	16.0552	15.3589
615	ENSG00000064545	protein_coding	transmembrane protein 161A [Source:HGNC Symbol;Acc:HGNC:26020]	TMEM161A	13.0781	13.1926	11.3586	12.7632	11.72	12.8411	13.6284	13.2847	12.4286	11.4095	11.7336	12.6239	11.023	10.8938	11.4353	10.396	11.2132	11.2682
616	ENSG00000064547	protein_coding	lysophosphatidic acid receptor 2 [Source:HGNC Symbol;Acc:HGNC:3168]	LPAR2	18.4631	18.8222	21.2553	21.5415	19.8856	18.5868	18.2569	19.4213	19.8081	20.5462	17.2987	21.1977	21.1598	19.5544	21.4949	20.2693	22.129	22.9454
617	ENSG00000064601	protein_coding	cathepsin A [Source:HGNC Symbol;Acc:HGNC:9251]	CTSA	28.2076	30.7069	34.0759	32.3989	29.7323	31.6592	32.2067	35.5384	28.275	29.8648	33.6587	30.6656	24.0402	30.5572	27.4704	29.736	28.0754	28.4493
618	ENSG00000064607	protein_coding	SURP and G-patch domain containing 2 [Source:HGNC Symbol;Acc:HGNC:18641]	SUGP2	210.21	209.887	228.466	218.303	211.056	205.072	214.454	219.974	211.519	211.781	202.153	207.295	206.225	204.75	215.894	204.203	204.895	211.789
619	ENSG00000064651	protein_coding	solute carrier family 12 member 2 [Source:HGNC Symbol;Acc:HGNC:10911]	SLC12A2	49.3632	46.2878	43.4103	47.761	45.1989	43.8833	49.3064	45.3839	45.7527	46.5927	44.99	44.2364	40.1593	39.7625	43.3766	39.8997	39.8832	41.5769
620	ENSG00000064652	protein_coding	sorting nexin 24 [Source:HGNC Symbol;Acc:HGNC:21533]	SNX24	17.5656	16.7751	17.9939	15.9973	17.0516	16.8515	19.2211	17.2634	14.8366	17.9098	17.2316	18.5151	18.0578	17.1578	18.3566	19.34	18.6461	17.9621
621	ENSG00000064666	protein_coding	calponin 2 [Source:HGNC Symbol;Acc:HGNC:2156]	CNN2	13.9115	15.2397	11.4711	11.0884	9.70263	8.6764	13.4998	14.566	13.7491	11.0459	9.65509	8.10036	4.9299	4.08519	4.25598	4.41394	5.13936	4.68577
622	ENSG00000064687	protein_coding	ATP binding cassette subfamily A member 7 [Source:HGNC Symbol;Acc:HGNC:37]	ABCA7	7.24422	7.73358	9.55926	9.35583	8.06951	8.52215	7.90703	8.69914	7.92322	8.40941	7.91181	9.41535	4.48677	5.1201	5.93258	5.0528	4.71462	5.2436
623	ENSG00000064703	protein_coding	DEAD-box helicase 20 [Source:HGNC Symbol;Acc:HGNC:2743]	DDX20	54.4919	49.7565	50.6641	49.9555	50.5786	49.8218	53.7421	49.6998	52.6661	52.502	54.7792	51.3899	49.4652	50.1661	46.6868	46.5206	47.4436	46.7461
624	ENSG00000064726	protein_coding	BTB domain containing 1 [Source:HGNC Symbol;Acc:HGNC:1120]	BTBD1	84.7509	85.7518	82.7157	79.2936	84.0574	84.2575	82.8631	82.1361	85.1358	79.6848	82.6717	79.9516	88.849	88.0767	84.8617	89.2661	86.3923	86.3892
625	ENSG00000064763	protein_coding	fatty acyl-CoA reductase 2 [Source:HGNC Symbol;Acc:HGNC:25531]	FAR2	6.15438	6.36883	6.86017	7.16126	6.5805	5.39865	5.52849	7.283	5.12679	5.54566	5.69918	6.62756	6.3701	6.15502	6.74939	7.95671	6.83833	6.69396
626	ENSG00000064932	protein_coding	strawberry notch homolog 2 [Source:HGNC Symbol;Acc:HGNC:29158]	SBNO2	36.4775	36.4502	36.3814	38.6939	37.4176	37.7905	34.7781	40.3937	36.6643	35.3195	33.3905	39.7654	37.5559	38.0195	36.2833	38.8543	36.8675	37.0771
627	ENSG00000064933	protein_coding	PMS1 homolog 1, mismatch repair system component [Source:HGNC Symbol;Acc:HGNC:9121]	PMS1	54.556	57.547	57.5805	58.6183	56.7748	51.9427	58.6277	53.4087	50.025	59.1841	59.2715	54.3355	48.4681	51.201	55.1128	46.9852	50.1619	50.0187
628	ENSG00000064961	protein_coding	high mobility group 20B [Source:HGNC Symbol;Acc:HGNC:5002]	HMG20B	57.8896	60.1059	61.4604	64.3358	60.1851	62.7786	59.3991	62.1753	63.9295	59.6386	57.3941	61.9625	68.5755	66.289	65.8603	69.9261	68.9354	67.8321
629	ENSG00000064995	protein_coding	TATA-box binding protein associated factor 11 [Source:HGNC Symbol;Acc:HGNC:11544]	TAF11	44.0423	49.6996	52.2385	45.7974	49.5218	48.0865	50.9135	47.6093	51.5009	48.2291	48.8789	48.2339	52.124	54.2513	53.2213	49.1341	53.1776	53.6632
630	ENSG00000064999	protein_coding	ankyrin repeat and sterile alpha motif domain containing 1A [Source:HGNC Symbol;Acc:HGNC:20961]	ANKS1A	65.7108	66.1335	63.4847	67.3389	63.0671	69.4112	64.8633	69.9978	68.2018	65.3206	66.5799	68.2218	66.9137	67.3784	67.9668	62.1436	67.7037	66.233
631	ENSG00000065000	protein_coding	adaptor related protein complex 3 subunit delta 1 [Source:HGNC Symbol;Acc:HGNC:568]	AP3D1	205.082	206.248	207.099	205.54	192.564	197.591	198.19	212.488	208.412	194.78	195.717	197.249	184.899	180.402	181.159	190.729	183.106	182.633
632	ENSG00000065029	protein_coding	zinc finger protein 76 [Source:HGNC Symbol;Acc:HGNC:13149]	ZNF76	24.8739	22.7458	26.4285	24.8911	23.8243	24.7952	24.7496	25.1533	24.5465	23.7282	22.1262	24.3011	25.3142	23.3673	25.149	26.3094	24.2102	25.9949
633	ENSG00000065054	protein_coding	SLC9A3 regulator 2 [Source:HGNC Symbol;Acc:HGNC:11076]	SLC9A3R2	15.7706	15.0122	13.889	14.9	14.0736	14.1522	13.6284	18.0052	14.6813	13.7278	13.4769	13.5707	14.125	13.7807	13.7137	14.6938	13.4218	10.8963
634	ENSG00000065057	protein_coding	nth like DNA glycosylase 1 [Source:HGNC Symbol;Acc:HGNC:8028]	NTHL1	26.2202	27.295	26.4848	26.5082	23.9203	28.69	25.0068	25.1533	28.6634	24.3191	25.8139	27.9831	22.6	20.3715	18.9585	20.792	21.3645	21.6438
635	ENSG00000065060	protein_coding	UHRF1 binding protein 1 [Source:HGNC Symbol;Acc:HGNC:21216]	UHRF1BP1	80.071	76.9946	79.1169	82.5854	75.2674	80.0543	83.3774	81.1246	81.8733	76.6847	76.5031	77.9002	67.6892	68.5222	69.2564	70.9715	68.2983	67.0139
636	ENSG00000065135	protein_coding	G protein subunit alpha i3 [Source:HGNC Symbol;Acc:HGNC:4387]	GNAI3	186.619	176.849	177.971	178.8	188.097	182.937	188.226	180.659	179.282	174.598	185.592	180.101	185.398	182.526	172.002	169.182	181.619	182.559
637	ENSG00000065150	protein_coding	importin 5 [Source:HGNC Symbol;Acc:HGNC:6402]	IPO5	479.529	466.801	460.306	462.998	487.773	478.32	479.114	478.048	485.025	460.108	464.182	474.87	455.047	455.526	439.097	440.871	448.739	462.106
638	ENSG00000065154	protein_coding	ornithine aminotransferase [Source:HGNC Symbol;Acc:HGNC:8091]	OAT	100.137	95.5325	92.1063	97.8897	95.0089	98.4097	100.606	99.1298	98.1081	90.5034	97.0202	95.9419	77.6598	76.1479	75.146	73.0623	74.1598	77.9474
639	ENSG00000065183	protein_coding	WD repeat domain 3 [Source:HGNC Symbol;Acc:HGNC:12755]	WDR3	150.398	144.436	149.912	144.38	149.238	143.296	154.348	144.649	144.327	140.278	151.129	141.493	142.081	138.515	135.59	136.542	141.651	142.953
640	ENSG00000065243	protein_coding	protein kinase N2 [Source:HGNC Symbol;Acc:HGNC:9406]	PKN2	68.3392	70.5121	74.4498	67.5699	72.1933	65.4779	72.6418	65.6819	66.6483	67.2298	68.7925	68.6426	67.8	77.9454	74.4152	67.0222	75.6464	74.2285
641	ENSG00000065268	protein_coding	WD repeat domain 18 [Source:HGNC Symbol;Acc:HGNC:17956]	WDR18	41.0292	40.8856	40.9361	46.1439	42.0287	44.5389	39.6637	40.2588	45.9858	40.7288	39.8943	46.13	39.3284	37.3114	39.8085	39.6674	39.0762	39.3828
642	ENSG00000065308	protein_coding	translocation associated membrane protein 2 [Source:HGNC Symbol;Acc:HGNC:16855]	TRAM2	39.8752	37.8149	40.7112	42.1012	36.6971	39.1016	40.1137	39.1124	36.1982	37.2741	34.9326	38.766	42.8181	38.7821	40.4103	34.0919	41.6671	37.1515
643	ENSG00000065328	protein_coding	minichromosome maintenance 10 replication initiation factor [Source:HGNC Symbol;Acc:HGNC:18043]	MCM10	165.719	151.658	150.53	152.639	155.194	151.394	154.926	159.282	146.813	160.188	157.432	153.381	118.927	120.213	114.439	126.901	115.36	115.88
644	ENSG00000065357	protein_coding	diacylglycerol kinase alpha [Source:HGNC Symbol;Acc:HGNC:2849]	DGKA	6.41081	4.94722	6.91641	6.41048	5.61984	6.13132	6.17134	5.86686	6.21429	6.27296	5.02869	5.57557	6.53628	6.3729	6.57743	4.87856	6.62596	5.65267
645	ENSG00000065413	protein_coding	ankyrin repeat domain 44 [Source:HGNC Symbol;Acc:HGNC:25259]	ANKRD44	167.643	170.196	166.387	161.417	167.827	162.461	173.505	159.349	165.456	174.734	171.579	169.266	168.171	174.574	173.85	169.182	171.553	172.778
646	ENSG00000065427	protein_coding	lysyl-tRNA synthetase 1 [Source:HGNC Symbol;Acc:HGNC:6215]	KARS1	212.454	214.152	211.878	215.588	213.842	222.501	219.661	213.298	221.695	208.144	215.63	211.135	223.895	211.667	207.554	215.412	220.823	207.922
647	ENSG00000065457	protein_coding	adenosine deaminase tRNA specific 1 [Source:HGNC Symbol;Acc:HGNC:228]	ADAT1	100.201	90.0166	99.3601	96.7347	97.7468	96.5201	103.82	97.5113	94.1465	97.3673	96.5509	95.8367	101.423	105.452	100.381	97.4551	100.069	101.153
648	ENSG00000065485	protein_coding	protein disulfide isomerase family A member 5 [Source:HGNC Symbol;Acc:HGNC:24811]	PDIA5	8.65459	10.6905	8.5471	9.12482	9.79869	8.90777	9.06415	8.02479	9.86519	8.22758	7.04017	8.15296	9.30588	8.38826	9.24279	11.0929	8.45234	8.70214
649	ENSG00000065491	protein_coding	TBC1 domain family member 22B [Source:HGNC Symbol;Acc:HGNC:21602]	TBC1D22B	20.771	19.732	20.0744	18.4229	18.5407	20.7848	19.3497	20.5677	19.9634	19.1825	20.5841	19.8827	19.8304	20.1536	21.9248	21.8955	22.129	22.3504
650	ENSG00000065518	protein_coding	NADH:ubiquinone oxidoreductase subunit B4 [Source:HGNC Symbol;Acc:HGNC:7699]	NDUFB4	60.1975	61.1863	59.9422	59.7734	60.3292	61.8531	58.9491	58.3989	56.7054	62.366	63.2274	56.6499	52.5118	50.2751	49.3092	48.7856	51.0963	51.5807
651	ENSG00000065526	protein_coding	spen family transcriptional repressor [Source:HGNC Symbol;Acc:HGNC:17575]	SPEN	311.309	315.314	319.617	299.675	290.839	297.504	311.46	297.389	294.946	311.012	300.38	306.972	305.599	306.77	316.275	305.607	292.816	295.798
652	ENSG00000065534	protein_coding	myosin light chain kinase [Source:HGNC Symbol;Acc:HGNC:7590]	MYLK	12.6934	11.2592	11.0213	9.35583	11.0956	12.7254	10.9284	9.98041	11.0304	11.3641	11.8007	9.78355	9.30588	10.2947	10.1886	10.1056	9.3443	10.3384
653	ENSG00000065548	protein_coding	zinc finger CCCH-type containing 15 [Source:HGNC Symbol;Acc:HGNC:29528]	ZC3H15	92.5721	87.5146	93.0622	84.7223	94.1923	88.2294	86.3345	81.9338	77.2902	89.5488	92.3268	89.2091	82.5343	89.5473	90.0635	88.1626	90.1725	86.8355
654	ENSG00000065559	protein_coding	mitogen-activated protein kinase kinase 4 [Source:HGNC Symbol;Acc:HGNC:6844]	MAP2K4	52.4404	50.8938	47.7401	47.8765	51.1549	51.3257	50.2707	48.8231	45.9858	50.1837	51.0244	49.4963	43.7598	46.6801	46.7298	42.9778	44.6827	45.8164
655	ENSG00000065600	protein_coding	proton activated chloride channel 1 [Source:HGNC Symbol;Acc:HGNC:25593]	PACC1	45.5168	42.6484	41.7234	42.159	43.0374	44.3075	45.9636	41.1355	45.0536	41.0015	40.9	41.1856	45.7539	43.7932	42.2159	43.849	44.6403	43.771
656	ENSG00000065609	protein_coding	synaptosome associated protein 91 [Source:HGNC Symbol;Acc:HGNC:14986]	SNAP91	99.1111	101.048	103.015	109.209	109.563	108.976	101.441	100.748	102.924	104.277	106.005	107.146	126.073	133.45	135.891	120.744	133.623	126.441
657	ENSG00000065613	protein_coding	STE20 like kinase [Source:HGNC Symbol;Acc:HGNC:11088]	SLK	77.122	77.1084	76.9239	73.4029	76.7084	66.6733	72.0632	66.0865	68.6679	75.8665	79.1851	74.0604	73.9485	79.6884	82.7122	72.3654	81.2105	78.9515
658	ENSG00000065615	protein_coding	cytochrome b5 reductase 4 [Source:HGNC Symbol;Acc:HGNC:20147]	CYB5R4	78.0837	78.5868	72.2005	74.8467	83.3369	80.8255	78.8774	75.3251	77.0572	78.9121	81.1295	73.061	81.2603	79.5795	82.1534	77.1859	80.3185	83.3026
659	ENSG00000065665	protein_coding	SEC61 translocon subunit alpha 2 [Source:HGNC Symbol;Acc:HGNC:17702]	SEC61A2	38.2084	36.109	35.313	34.709	36.6971	34.4357	36.1923	38.5055	38.684	37.0469	37.0782	33.5586	34.7309	37.039	34.8217	34.3242	32.3653	34.4367
660	ENSG00000065675	protein_coding	protein kinase C theta [Source:HGNC Symbol;Acc:HGNC:9410]	PRKCQ	4.29524	4.4923	3.0927	3.81164	4.51508	4.31892	4.82136	4.24842	4.50536	4.3638	3.9559	4.15538	5.09608	4.03072	3.86908	3.83316	3.99256	4.87171
661	ENSG00000065717	protein_coding	TLE family member 2, transcriptional corepressor [Source:HGNC Symbol;Acc:HGNC:11838]	TLE2	3.65416	3.07069	3.76747	2.82985	3.55443	3.39344	3.40709	3.77637	4.42768	3.31831	3.15131	3.78718	2.60343	2.66899	2.32145	2.3812	3.78019	2.90071
662	ENSG00000065802	protein_coding	ankyrin repeat and SOCS box containing 1 [Source:HGNC Symbol;Acc:HGNC:16011]	ASB1	87.3152	81.032	80.1853	87.5521	83.481	88.615	84.2131	87.7332	88.0099	89.8216	85.0854	86.1057	89.3476	89.4929	86.9682	82.2387	90.0451	88.0999
663	ENSG00000065809	protein_coding	family with sequence similarity 107 member B [Source:HGNC Symbol;Acc:HGNC:23726]	FAM107B	155.398	159.107	163.576	164.593	173.735	168.129	167.333	161.777	164.679	166.279	174.998	165.268	193.54	191.84	188.94	196.072	188.542	193.79
664	ENSG00000065833	protein_coding	malic enzyme 1 [Source:HGNC Symbol;Acc:HGNC:6983]	ME1	31.9258	32.754	32.2766	30.8396	31.4135	32.6233	32.8495	37.1568	36.509	35.8195	38.151	33.6112	32.4598	32.6815	33.532	34.5565	35.8481	34.6226
665	ENSG00000065882	protein_coding	TBC1 domain family member 1 [Source:HGNC Symbol;Acc:HGNC:11578]	TBC1D1	63.2747	59.8784	58.93	60.1199	60.1851	65.3237	62.2919	64.9401	62.6867	61.7296	63.9649	62.5411	65.5289	64.3826	62.3781	62.7244	64.688	62.0307
666	ENSG00000065883	protein_coding	cyclin dependent kinase 13 [Source:HGNC Symbol;Acc:HGNC:1733]	CDK13	143.153	138.465	137.766	134.736	141.841	141.098	144.062	139.186	140.132	142.596	131.752	135.129	152.218	156.762	158.675	157.798	149.891	149.201
667	ENSG00000065911	protein_coding	methylenetetrahydrofolate dehydrogenase (NADP+ dependent) 2, methenyltetrahydrofolate cyclohydrolase [Source:HGNC Symbol;Acc:HGNC:7434]	MTHFD2	202.133	203.234	188.542	189.716	196.118	186.909	207.318	216.265	215.869	196.507	203.427	195.145	136.874	143.199	135.332	137.181	137.701	139.941
668	ENSG00000065970	protein_coding	forkhead box J2 [Source:HGNC Symbol;Acc:HGNC:24818]	FOXJ2	25.8356	26.7264	28.5091	24.7756	25.9377	25.6821	26.1639	28.9297	27.1098	24.41	26.1492	26.2473	23.3201	22.6047	22.1827	23.057	21.7467	21.3463
669	ENSG00000065978	protein_coding	Y-box binding protein 1 [Source:HGNC Symbol;Acc:HGNC:8014]	YBX1	1053.55	1038.18	1060.46	1001.42	1016.47	1043.71	1059.22	1076.94	1071.03	1017.27	1058.71	1028.8	1052.84	1042.1	1033.82	1146.23	1050.47	1025.48
670	ENSG00000065989	protein_coding	phosphodiesterase 4A [Source:HGNC Symbol;Acc:HGNC:8780]	PDE4A	1.98735	2.10399	1.79939	2.59884	2.01738	1.61959	2.24997	2.69741	2.175	1.90916	1.81033	1.89359	2.38186	3.05027	2.1065	1.97466	2.80329	2.08256
671	ENSG00000066027	protein_coding	protein phosphatase 2 regulatory subunit B'alpha [Source:HGNC Symbol;Acc:HGNC:9309]	PPP2R5A	15.0013	13.3632	13.889	13.514	13.6413	15.3862	13.6927	14.7009	13.8268	13.7732	14.4826	14.3597	15.399	15.5237	15.3043	12.7772	13.3793	13.016
672	ENSG00000066032	protein_coding	catenin alpha 2 [Source:HGNC Symbol;Acc:HGNC:2510]	CTNNA2	53.0815	51.9174	51.7325	54.4024	54.7094	55.4518	53.8706	47.407	51.8117	53.6838	52.3654	57.3863	75.8873	79.4161	76.4787	78.4055	78.1948	80.1415
673	ENSG00000066044	protein_coding	ELAV like RNA binding protein 1 [Source:HGNC Symbol;Acc:HGNC:3312]	ELAVL1	225.468	213.47	202.713	213.105	200.393	216.563	208.926	217.479	211.674	204.599	209.126	199.774	198.803	200.447	182.534	191.716	189.987	188.732
674	ENSG00000066084	protein_coding	disco interacting protein 2 homolog B [Source:HGNC Symbol;Acc:HGNC:29284]	DIP2B	116.933	113.672	108.919	106.206	115.759	114.567	114.555	115.179	118.615	115.277	111.704	111.301	118.872	117.871	116.545	116.737	117.356	118.557
675	ENSG00000066117	protein_coding	SWI/SNF related, matrix associated, actin dependent regulator of chromatin, subfamily d, member 1 [Source:HGNC Symbol;Acc:HGNC:11106]	SMARCD1	177.387	175.712	176.172	181.226	177.866	177.307	172.219	187.942	174.932	177.37	181.368	177.471	184.844	190.315	185.759	199.324	191.516	196.43
676	ENSG00000066135	protein_coding	lysine demethylase 4A [Source:HGNC Symbol;Acc:HGNC:22978]	KDM4A	44.3628	44.923	42.7917	41.466	46.1595	44.5389	44.9993	49.6998	46.3741	44.4108	42.5762	43.6052	42.8735	43.6843	45.999	45.4171	42.7714	41.986
677	ENSG00000066136	protein_coding	nuclear transcription factor Y subunit gamma [Source:HGNC Symbol;Acc:HGNC:7806]	NFYC	43.0806	38.8385	38.6307	44.8733	40.1074	42.3408	39.9208	42.2819	41.4027	44.6835	42.3081	44.4994	41.4887	42.3226	39.6795	46.1721	44.3429	41.6141
678	ENSG00000066279	protein_coding	assembly factor for spindle microtubules [Source:HGNC Symbol;Acc:HGNC:19048]	ASPM	488.568	517.013	484.711	487.254	519.331	458.307	498.207	434.35	416.979	456.063	487.314	492.386	601.227	707.664	771.623	630.148	717.09	713.241
679	ENSG00000066322	protein_coding	ELOVL fatty acid elongase 1 [Source:HGNC Symbol;Acc:HGNC:14418]	ELOVL1	15.3859	15.6946	16.9817	20.8485	15.5626	16.5044	16.0069	16.5891	16.7786	16.137	16.9635	16.8845	13.6265	14.2709	12.2951	12.3126	12.9971	12.9045
680	ENSG00000066379	protein_coding	RNA polymerase I subunit H [Source:HGNC Symbol;Acc:HGNC:13182]	POLR1H	8.84692	10.0082	8.60333	9.06707	9.17427	9.52476	9.89986	7.41787	9.47679	9.63673	11.0631	8.20556	10.1368	7.9525	8.68392	8.59557	8.74966	8.40463
681	ENSG00000066382	protein_coding	metallophosphoesterase domain containing 2 [Source:HGNC Symbol;Acc:HGNC:1180]	MPPED2	11.0907	10.2356	10.5714	9.12482	9.60656	11.4143	11.1213	10.1827	10.0982	10.7731	13.0746	10.9407	13.2387	14.8701	14.3156	13.5903	14.781	13.9086
682	ENSG00000066422	protein_coding	zinc finger and BTB domain containing 11 [Source:HGNC Symbol;Acc:HGNC:16740]	ZBTB11	67.5058	66.9865	69.1078	58.9649	66.7656	58.4211	73.2204	62.5124	63.5411	61.275	64.4343	64.1717	55.1706	57.6284	60.1426	55.8131	54.4518	55.4483
683	ENSG00000066427	protein_coding	ataxin 3 [Source:HGNC Symbol;Acc:HGNC:7106]	ATXN3	39.1059	38.2699	37.4498	39.5024	42.8933	40.567	40.8208	41.0006	37.6741	40.6834	41.1012	39.7654	44.8677	46.6801	45.5691	44.7202	43.5784	45.2214
684	ENSG00000066455	protein_coding	golgin A5 [Source:HGNC Symbol;Acc:HGNC:4428]	GOLGA5	39.5547	43.0465	40.4863	38.4051	41.5484	40.2971	42.428	39.8542	36.742	38.8196	42.9115	41.4486	43.5936	41.6689	41.786	39.2027	43.7483	41.6141
685	ENSG00000066557	protein_coding	leucine rich repeat containing 40 [Source:HGNC Symbol;Acc:HGNC:26004]	LRRC40	42.0549	42.4778	42.6231	40.4264	44.7186	38.0605	43.9708	39.1124	38.3732	40.2742	41.4364	37.714	43.2613	43.6843	45.3542	43.3844	44.258	44.552
686	ENSG00000066583	protein_coding	isochorismatase domain containing 1 [Source:HGNC Symbol;Acc:HGNC:24254]	ISOC1	88.4051	85.3537	87.5516	89.5157	87.1796	88.5378	88.1344	88.0704	95.7778	88.0942	87.8345	85.7375	85.0824	87.3141	78.2843	88.3369	77.6426	85.7942
687	ENSG00000066629	protein_coding	EMAP like 1 [Source:HGNC Symbol;Acc:HGNC:3330]	EML1	70.7112	71.9906	69.1641	72.7098	68.1586	71.7635	68.849	74.7182	74.2608	72.2755	66.714	68.59	80.7618	78.6535	80.9067	78.5216	83.9288	77.9102
688	ENSG00000066651	protein_coding	tRNA methyltransferase 11 homolog [Source:HGNC Symbol;Acc:HGNC:21080]	TRMT11	19.9376	22.4046	19.7371	21.1373	21.8069	20.9776	19.9926	17.8703	19.4973	20.6826	22.9979	20.6717	23.3755	21.6787	21.1939	24.1024	24.55	24.2098
689	ENSG00000066654	protein_coding	THUMP domain containing 1 [Source:HGNC Symbol;Acc:HGNC:23807]	THUMPD1	90.136	87.2303	86.8768	82.9897	86.2189	81.6739	85.8202	83.4848	80.242	84.0941	89.0414	83.9492	84.6392	88.0767	86.0654	88.7434	90.6822	89.4015
690	ENSG00000066697	protein_coding	Myb/SANT DNA binding domain containing 3 [Source:HGNC Symbol;Acc:HGNC:23370]	MSANTD3	44.9398	42.0798	44.3662	43.9493	42.3649	44.3846	43.5208	40.9332	42.5679	44.6835	42.8444	42.8688	45.477	45.1005	44.4944	48.2049	44.7677	47.2668
691	ENSG00000066735	protein_coding	kinesin family member 26A [Source:HGNC Symbol;Acc:HGNC:20226]	KIF26A	234.956	231.439	204.343	251.857	211.248	228.093	208.283	244.385	236.609	221.008	203.897	229.072	141.139	148.973	131.806	130.269	136.427	139.755
692	ENSG00000066739	protein_coding	autophagy related 2B [Source:HGNC Symbol;Acc:HGNC:20187]	ATG2B	107.638	104.062	102.115	106.091	105.144	103.307	108.834	101.625	104.245	104.549	102.585	109.25	116.213	118.634	115.943	106.631	106.398	113.872
693	ENSG00000066777	protein_coding	ADP ribosylation factor guanine nucleotide exchange factor 1 [Source:HGNC Symbol;Acc:HGNC:15772]	ARFGEF1	83.7893	86.4342	84.0653	77.9075	89.8694	85.8	86.013	78.9666	75.1152	83.3668	84.2809	87.4207	89.1814	92.3253	93.4597	93.5639	91.2768	90.3312
694	ENSG00000066827	protein_coding	zinc finger and AT-hook domain containing [Source:HGNC Symbol;Acc:HGNC:19899]	ZFAT	11.4754	11.7141	10.3465	10.9151	13.161	12.2241	11.7641	12.6104	11.2634	10.364	14.1474	10.6777	10.6907	10.2402	9.28578	10.8606	9.42925	9.55748
695	ENSG00000066855	protein_coding	mitochondrial fission regulator 1 [Source:HGNC Symbol;Acc:HGNC:29510]	MTFR1	20.1299	21.7223	20.0182	21.9458	19.5494	19.0881	19.7997	20.9049	20.6625	20.7281	21.858	19.1463	19.6642	20.6983	20.5921	18.9335	18.6037	20.5653
696	ENSG00000066926	protein_coding	ferrochelatase [Source:HGNC Symbol;Acc:HGNC:3647]	FECH	33.3362	34.3462	35.538	33.1497	36.1207	35.4383	37.1566	34.0548	39.2277	38.956	37.8158	36.2412	37.5005	35.296	32.8871	36.0665	36.7401	36.7052
697	ENSG00000066933	protein_coding	myosin IXA [Source:HGNC Symbol;Acc:HGNC:7608]	MYO9A	80.0069	78.9849	70.4574	76.5792	82.7605	75.9667	79.2631	73.0998	76.2804	72.5937	80.4591	74.0604	80.651	81.377	81.2506	72.5396	77.0905	79.8068
698	ENSG00000067057	protein_coding	phosphofructokinase, platelet [Source:HGNC Symbol;Acc:HGNC:8878]	PFKP	102.252	100.935	107.064	106.495	99.6201	100.029	96.62	106.413	108.672	99.1856	98.7635	100.781	134.326	134.103	137.868	137.529	138.338	134.139
699	ENSG00000067064	protein_coding	isopentenyl-diphosphate delta isomerase 1 [Source:HGNC Symbol;Acc:HGNC:5387]	IDI1	79.0453	77.8476	82.7157	80.9684	85.0661	83.8719	81.0631	74.6508	78.9992	85.6851	86.8958	78.4262	68.9079	69.2848	69.6863	71.0296	72.2909	72.4063
700	ENSG00000067082	protein_coding	Kruppel like factor 6 [Source:HGNC Symbol;Acc:HGNC:2235]	KLF6	27.2459	28.2617	30.0836	29.1648	30.0205	28.69	30.0853	25.2208	30.2947	29.9102	28.4289	29.7188	32.4598	34.0977	32.0703	38.3897	36.1454	36.9283
701	ENSG00000067113	protein_coding	phospholipid phosphatase 1 [Source:HGNC Symbol;Acc:HGNC:9228]	PLPP1	5.12865	5.459	4.55471	6.00621	6.10017	5.63002	5.33564	4.11355	4.35	5.04565	5.90033	4.83917	4.43137	5.22904	4.94382	4.29778	5.13936	4.61139
702	ENSG00000067141	protein_coding	neogenin 1 [Source:HGNC Symbol;Acc:HGNC:7754]	NEO1	158.603	155.013	152.442	154.14	150.247	156.946	152.355	162.451	156.134	150.506	148.313	158.01	165.955	170.107	159.191	161.109	163.695	163.63
703	ENSG00000067167	protein_coding	translocation associated membrane protein 1 [Source:HGNC Symbol;Acc:HGNC:20568]	TRAM1	71.8652	71.3082	68.5455	65.7796	66.2853	69.9896	75.5346	74.5159	68.8233	71.5482	72.8825	66.6438	58.328	63.0209	60.8734	61.9113	61.9697	61.3985
704	ENSG00000067177	protein_coding	phosphorylase kinase regulatory subunit alpha 1 [Source:HGNC Symbol;Acc:HGNC:8925]	PHKA1	32.5669	33.7776	32.8389	34.7667	38.1381	37.8677	37.3495	34.7291	32.7804	35.7286	35.1338	36.925	37.2789	37.9106	33.1021	34.7888	37.2073	39.3084
705	ENSG00000067182	protein_coding	TNF receptor superfamily member 1A [Source:HGNC Symbol;Acc:HGNC:11916]	TNFRSF1A	5.83384	5.11781	4.77963	5.42869	4.85131	5.20584	3.98566	4.65303	4.89375	4.77291	5.09574	5.73337	4.04363	4.73882	4.64289	4.76241	3.95009	4.53701
706	ENSG00000067191	protein_coding	calcium voltage-gated channel auxiliary subunit beta 1 [Source:HGNC Symbol;Acc:HGNC:1401]	CACNB1	24.9381	24.1106	26.5972	24.4869	23.3439	23.4841	23.7211	25.4905	22.9929	25.1373	22.6626	27.1941	21.9907	25.0014	26.4387	25.5544	24.3801	25.6602
707	ENSG00000067208	protein_coding	ecotropic viral integration site 5 [Source:HGNC Symbol;Acc:HGNC:3501]	EVI5	27.5024	27.5793	28.9027	24.1981	27.3307	24.1397	25.3282	26.0974	24.5465	27.3647	24.8082	23.4595	24.2064	25.2192	24.3752	25.264	22.6812	23.4288
708	ENSG00000067221	protein_coding	stomatin like 1 [Source:HGNC Symbol;Acc:HGNC:14560]	STOML1	8.14173	8.52969	7.87233	7.27676	6.77263	8.29078	8.61416	7.0807	7.76786	8.04576	8.5823	8.36336	7.47794	6.48183	7.26526	8.42133	7.51791	8.10712
709	ENSG00000067225	protein_coding	pyruvate kinase M1/2 [Source:HGNC Symbol;Acc:HGNC:9021]	PKM	846.932	826.982	791.113	836.539	785.048	835.942	800.924	841.187	830.928	788.621	812.167	811.719	805.291	796.285	777.641	809.029	791.717	786.949
710	ENSG00000067248	protein_coding	DExH-box helicase 29 [Source:HGNC Symbol;Acc:HGNC:15815]	DHX29	49.6197	50.1546	49.2583	50.1865	48.7533	46.6212	49.2421	48.6208	42.1018	49.2746	53.4382	47.9709	48.3574	45.8631	44.5803	42.9197	48.3355	47.2668
711	ENSG00000067334	protein_coding	deoxynucleotidyltransferase terminal interacting protein 2 [Source:HGNC Symbol;Acc:HGNC:24013]	DNTTIP2	89.3026	89.1068	91.319	86.9168	93.7601	76.8536	85.113	79.7759	76.0474	88.867	86.2923	86.8947	78.7677	79.3071	88.8598	80.0898	87.1144	85.4595
712	ENSG00000067365	protein_coding	methyltransferase like 22 [Source:HGNC Symbol;Acc:HGNC:28368]	METTL22	14.6166	13.9887	16.1383	16.1706	13.4972	14.5764	14.6569	15.7124	15.3804	13.8187	12.8064	15.5695	15.2882	15.5782	16.852	19.2239	18.5612	17.9993
713	ENSG00000067369	protein_coding	tumor protein p53 binding protein 1 [Source:HGNC Symbol;Acc:HGNC:11999]	TP53BP1	265.856	266.354	264.735	262.425	263.076	269.778	269.353	273.45	266.826	275.147	258.274	268.311	279.454	282.314	283.216	272.328	270.645	266.271
714	ENSG00000067445	protein_coding	trophinin [Source:HGNC Symbol;Acc:HGNC:12326]	TRO	99.7522	98.9444	97.6731	100.027	100.437	103.538	100.349	98.1857	104.245	102.368	103.859	102.149	99.152	101.367	100.08	90.66	97.6055	105.095
715	ENSG00000067533	protein_coding	ribosomal RNA processing 15 homolog [Source:HGNC Symbol;Acc:HGNC:24255]	RRP15	97.8931	99.2287	99.1914	89.9777	98.3232	91.1215	95.1415	94.1396	90.5733	97.2764	96.8861	91.5235	79.7093	79.4705	84.9047	80.9029	80.3185	83.972
716	ENSG00000067560	protein_coding	ras homolog family member A [Source:HGNC Symbol;Acc:HGNC:667]	RHOA	349.581	347.67	341.603	360.431	346.124	361.247	353.631	349.517	359.652	343.649	358.646	348.052	334.735	333.515	315.717	333.194	324.587	330.012
717	ENSG00000067596	protein_coding	DEAH-box helicase 8 [Source:HGNC Symbol;Acc:HGNC:2749]	DHX8	113.728	115.208	114.486	119.027	112.925	117.613	114.234	114.37	120.557	117.05	116.733	119.244	133.495	130.726	128.453	133.522	128.272	132.949
718	ENSG00000067606	protein_coding	protein kinase C zeta [Source:HGNC Symbol;Acc:HGNC:9412]	PRKCZ	29.6179	31.1049	31.5456	28.414	28.4354	30.8494	31.0495	30.6156	30.5277	33.7285	31.312	30.613	29.9672	28.7053	26.0088	34.2661	27.056	26.7014
719	ENSG00000067704	protein_coding	isoleucyl-tRNA synthetase 2, mitochondrial [Source:HGNC Symbol;Acc:HGNC:29685]	IARS2	209.121	208.807	196.977	193.816	204.236	214.326	206.804	204.396	203.518	199.235	207.853	201.089	202.514	202.135	198.741	198.221	194.234	204.761
720	ENSG00000067715	protein_coding	synaptotagmin 1 [Source:HGNC Symbol;Acc:HGNC:11509]	SYT1	81.866	77.5064	81.9285	80.7374	85.7386	82.9078	76.756	77.1459	75.5813	77.5029	82.6046	85.8953	85.027	81.4314	82.7552	87.698	89.7902	90.294
721	ENSG00000067829	protein_coding	isocitrate dehydrogenase (NAD(+)) 3 non-catalytic subunit gamma [Source:HGNC Symbol;Acc:HGNC:5386]	IDH3G	24.6816	21.4948	21.9863	26.3349	23.1518	24.024	22.8854	22.5234	22.6822	23.5463	24.8753	26.2473	21.6029	21.1885	19.9472	21.8955	21.5768	21.3091
722	ENSG00000067836	protein_coding	rogdi atypical leucine zipper [Source:HGNC Symbol;Acc:HGNC:29478]	ROGDI	7.50065	6.99434	8.5471	6.75699	7.44509	6.864	6.42848	6.27147	7.61251	6.5457	6.77197	7.46916	5.48382	5.39245	6.44846	6.04013	6.28617	5.42954
723	ENSG00000067840	protein_coding	PDZ domain containing 4 [Source:HGNC Symbol;Acc:HGNC:21167]	PDZD4	134.114	133.916	134.561	147.441	136.797	139.941	128.634	137.231	142.773	134.232	131.685	144.649	129.285	133.123	127.551	126.959	131.287	133.619
724	ENSG00000067842	protein_coding	ATPase plasma membrane Ca2+ transporting 3 [Source:HGNC Symbol;Acc:HGNC:816]	ATP2B3	32.8233	29.4559	34.0759	32.1679	28.9638	30.4252	32.3995	32.5038	31.9259	31.2285	29.5017	30.6656	31.1858	31.1019	29.319	28.7487	31.2185	28.5237
725	ENSG00000067900	protein_coding	Rho associated coiled-coil containing protein kinase 1 [Source:HGNC Symbol;Acc:HGNC:10251]	ROCK1	90.9053	87.5146	88.6762	84.6645	88.7166	78.2419	81.7702	76.7413	82.2617	85.3669	86.5605	86.9999	83.9191	90.2554	98.1885	86.4784	93.0183	87.0958
726	ENSG00000067955	protein_coding	core-binding factor subunit beta [Source:HGNC Symbol;Acc:HGNC:1539]	CBFB	128.344	126.808	118.085	118.738	120.178	118.732	129.341	131.296	128.636	123.732	115.66	117.455	106.353	107.032	105.153	101.579	104.996	106.583
727	ENSG00000067992	protein_coding	pyruvate dehydrogenase kinase 3 [Source:HGNC Symbol;Acc:HGNC:8811]	PDK3	36.5416	36.6208	40.7112	37.7121	40.4917	39.1402	38.9566	41.675	40.0045	37.0014	37.2794	37.6088	44.3137	42.5404	45.913	44.2555	40.3079	45.5189
728	ENSG00000068001	protein_coding	hyaluronidase 2 [Source:HGNC Symbol;Acc:HGNC:5321]	HYAL2	25.6432	22.234	24.2918	28.2408	27.6189	27.9187	25.7782	22.7257	24.5465	25.6373	22.1933	26.9837	25.0927	25.8184	23.3004	24.2186	24.5925	25.2511
729	ENSG00000068024	protein_coding	histone deacetylase 4 [Source:HGNC Symbol;Acc:HGNC:14063]	HDAC4	48.2093	49.984	48.6398	50.071	49.0895	46.8526	47.185	53.4087	55.4625	52.8656	50.5551	49.6015	40.9348	43.1396	44.9243	40.3062	40.3504	40.61
730	ENSG00000068028	protein_coding	Ras association domain family member 1 [Source:HGNC Symbol;Acc:HGNC:9882]	RASSF1	16.8604	16.0927	15.1261	17.3834	16.4272	16.6973	15.5569	16.9937	19.342	16.4552	15.6895	15.4643	17.5593	18.3561	17.1959	17.3654	17.6267	21.0488
731	ENSG00000068078	protein_coding	fibroblast growth factor receptor 3 [Source:HGNC Symbol;Acc:HGNC:3690]	FGFR3	3.84649	3.80993	2.98024	3.52288	3.2182	3.16207	2.9571	3.91124	3.49554	3.77287	2.95017	3.05078	1.49559	1.47067	2.02052	2.55544	1.99628	2.34288
732	ENSG00000068097	protein_coding	HEAT repeat containing 6 [Source:HGNC Symbol;Acc:HGNC:24076]	HEATR6	81.6096	83.9321	82.2659	80.5064	81.1755	85.3758	86.0773	84.4963	83.4269	81.6394	85.6218	84.4225	78.5461	79.7429	79.0151	78.9282	83.0793	80.9225
733	ENSG00000068120	protein_coding	Coenzyme A synthase [Source:HGNC Symbol;Acc:HGNC:29932]	COASY	53.979	52.9409	54.3753	57.6366	50.8187	56.5701	48.7921	53.5436	52.8992	50.8656	49.6835	54.8615	46.8064	48.3142	48.7933	47.8564	48.293	49.684
734	ENSG00000068137	protein_coding	pleckstrin homology, MyTH4 and FERM domain containing H3 [Source:HGNC Symbol;Acc:HGNC:26105]	PLEKHH3	19.2324	21.3242	19.0623	22.119	19.5494	22.0959	18.1283	21.7816	23.6143	18.0916	19.6454	22.3023	18.1132	19.6634	17.5828	20.3274	18.2214	17.9249
735	ENSG00000068305	protein_coding	myocyte enhancer factor 2A [Source:HGNC Symbol;Acc:HGNC:6993]	MEF2A	70.4548	66.4747	68.8829	64.4513	65.4207	64.2439	68.0133	64.1983	66.959	67.0025	68.2561	66.223	70.4034	70.6465	70.1162	69.2872	73.8624	71.6253
736	ENSG00000068308	protein_coding	OTU deubiquitinase 5 [Source:HGNC Symbol;Acc:HGNC:25402]	OTUD5	55.0048	58.3999	60.392	57.2323	54.133	57.6499	57.0206	54.9597	61.6768	55.8657	53.3041	56.2817	60.0451	58.4454	59.6697	58.0201	61.5025	59.8365
737	ENSG00000068323	protein_coding	transcription factor binding to IGHM enhancer 3 [Source:HGNC Symbol;Acc:HGNC:11752]	TFE3	26.4766	26.7832	26.3161	26.6815	26.5621	29.9625	26.9996	25.9626	30.6054	30.0466	26.8197	27.5623	27.6961	28.9776	25.3209	26.3675	26.6737	26.6271
738	ENSG00000068354	protein_coding	TBC1 domain family member 25 [Source:HGNC Symbol;Acc:HGNC:8092]	TBC1D25	12.2446	9.55325	10.3465	10.8574	11.1916	10.6045	10.5427	9.44093	9.94287	9.59127	10.5938	11.6245	10.6353	11.8743	9.54372	10.7445	11.553	9.70624
739	ENSG00000068366	protein_coding	acyl-CoA synthetase long chain family member 4 [Source:HGNC Symbol;Acc:HGNC:3571]	ACSL4	57.8896	56.0685	61.4604	56.7703	61.3859	55.6832	55.6063	56.713	55.1518	59.5022	65.2389	59.7533	60.5436	60.951	64.9575	55.9873	57.2975	59.9109
740	ENSG00000068383	protein_coding	inositol polyphosphate-5-phosphatase A [Source:HGNC Symbol;Acc:HGNC:6076]	INPP5A	25.0663	22.7458	23.3921	21.657	21.3746	22.3273	21.9854	22.9954	25.9447	20.8644	22.3944	23.9855	18.6118	20.317	18.1417	18.8173	20.5575	19.6728
741	ENSG00000068394	protein_coding	G-patch domain and KOW motifs [Source:HGNC Symbol;Acc:HGNC:30677]	GPKOW	20.9633	22.1772	20.0182	18.8849	20.1257	20.2449	21.5354	19.826	21.1286	20.5462	20.2489	18.4625	21.2706	22.2779	20.6351	22.3601	22.936	20.6025
742	ENSG00000068400	protein_coding	GRIP1 associated protein 1 [Source:HGNC Symbol;Acc:HGNC:18706]	GRIPAP1	70.1984	74.4926	85.7522	74.7312	71.713	72.419	74.8918	79.7084	79.3876	72.6391	73.9553	72.4824	74.6133	76.039	81.2076	81.9483	80.9556	79.5093
743	ENSG00000068438	protein_coding	FtsJ RNA 2'-O-methyltransferase 1 [Source:HGNC Symbol;Acc:HGNC:13254]	FTSJ1	39.2983	41.9092	42.6793	38.9826	40.5877	43.6519	40.6923	41.7424	40.1599	40.047	39.492	40.344	38.7191	33.3896	36.7132	37.4023	36.2304	36.7052
744	ENSG00000068489	protein_coding	proline rich 11 [Source:HGNC Symbol;Acc:HGNC:25619]	PRR11	205.082	209.717	206.311	202.998	201.209	203.375	214.454	206.284	214.315	199.326	200.544	199.879	299.672	289.34	276.338	273.083	286.658	289.402
745	ENSG00000068615	protein_coding	receptor accessory protein 1 [Source:HGNC Symbol;Acc:HGNC:25786]	REEP1	22.4378	19.732	20.9179	18.1919	21.4226	19.5894	21.9854	20.5003	19.575	20.5917	20.1148	20.5665	12.7402	14.3799	12.9829	14.6938	14.0164	13.5367
746	ENSG00000068650	protein_coding	ATPase phospholipid transporting 11A [Source:HGNC Symbol;Acc:HGNC:13552]	ATP11A	76.0963	79.0986	73.4376	71.9013	75.8438	71.4164	71.9347	74.6508	77.7563	73.321	74.6928	76.4274	69.1294	64.3281	72.6096	68.8807	68.2983	67.1627
747	ENSG00000068654	protein_coding	RNA polymerase I subunit A [Source:HGNC Symbol;Acc:HGNC:17264]	POLR1A	197.132	186.118	179.096	189.889	177.145	181.587	175.626	184.57	184.254	177.643	171.445	179.312	159.862	163.789	155.365	158.089	157.112	159.205
748	ENSG00000068697	protein_coding	lysosomal protein transmembrane 4 alpha [Source:HGNC Symbol;Acc:HGNC:6924]	LAPTM4A	103.214	98.9444	101.216	105.051	103.991	107.433	104.913	106.076	106.963	100.867	102.585	107.724	100.537	95.9202	94.1045	95.3062	98.9646	102.12
749	ENSG00000068724	protein_coding	tetratricopeptide repeat domain 7A [Source:HGNC Symbol;Acc:HGNC:19750]	TTC7A	20.1941	22.2909	19.7371	22.9853	22.0471	21.3247	20.8926	21.4444	22.2938	19.8644	21.5228	22.4601	19.6088	18.6285	20.1192	19.6304	18.5187	19.7472
750	ENSG00000068745	protein_coding	inositol hexakisphosphate kinase 2 [Source:HGNC Symbol;Acc:HGNC:17313]	IP6K2	64.2363	71.8768	72.4817	77.33	72.4335	77.5863	69.1704	69.3234	72.6295	72.0482	74.1564	75.0598	84.2515	89.0027	87.4841	88.0465	87.4117	85.6455
751	ENSG00000068784	protein_coding	S1 RNA binding domain 1 [Source:HGNC Symbol;Acc:HGNC:25521]	SRBD1	58.9153	55.0449	54.6565	54.8645	56.6787	56.1845	58.4349	53.5436	52.9768	57.7749	59.4056	55.9135	62.8701	59.8072	59.4548	62.8406	61.3326	61.0638
752	ENSG00000068796	protein_coding	kinesin family member 2A [Source:HGNC Symbol;Acc:HGNC:6318]	KIF2A	297.59	300.074	301.342	286.739	302.415	282.118	301.496	278.035	280.653	297.466	304.739	288.246	290.089	302.685	313.137	282.027	292.944	295.687
753	ENSG00000068831	protein_coding	RAS guanyl releasing protein 2 [Source:HGNC Symbol;Acc:HGNC:9879]	RASGRP2	5.00043	6.19824	6.29787	5.60195	5.42771	4.82022	5.65706	5.9343	6.05893	5.86386	5.22984	6.78536	6.53628	5.01117	5.15877	5.74974	5.81895	5.61549
754	ENSG00000068878	protein_coding	proteasome activator subunit 4 [Source:HGNC Symbol;Acc:HGNC:20635]	PSME4	171.81	165.533	171.392	166.846	172.774	172.101	174.083	169.6	167.242	176.961	176.406	169.213	195.257	204.532	200.719	208.501	203.366	202.567
755	ENSG00000068885	protein_coding	intraflagellar transport 80 [Source:HGNC Symbol;Acc:HGNC:29262]	IFT80	27.5024	26.2146	27.6656	26.1617	30.3567	28.0344	28.9924	28.1879	27.3429	29.4557	30.9767	28.9824	32.2382	35.0782	37.831	29.7941	32.2378	34.3623
756	ENSG00000068903	protein_coding	sirtuin 2 [Source:HGNC Symbol;Acc:HGNC:10886]	SIRT2	14.5525	14.4436	13.5517	13.8605	14.5539	14.3835	14.2069	13.7568	12.6616	14.3187	15.4884	16.7793	15.7868	13.2905	14.4445	13.4741	14.4837	14.5408
757	ENSG00000068912	protein_coding	endoplasmic reticulum lectin 1 [Source:HGNC Symbol;Acc:HGNC:25222]	ERLEC1	45.3244	40.8288	45.8844	44.3536	43.6618	44.5389	44.2922	44.0352	47.384	42.5016	43.582	46.0248	52.124	49.7304	51.1148	49.773	51.0114	51.8038
758	ENSG00000068971	protein_coding	protein phosphatase 2 regulatory subunit B'beta [Source:HGNC Symbol;Acc:HGNC:9310]	PPP2R5B	16.604	15.2397	17.8252	16.8058	16.091	17.5456	17.4855	16.7239	15.7688	16.9552	16.7623	16.2007	16.2299	18.2472	15.0894	15.7392	16.9472	16.4374
759	ENSG00000069020	protein_coding	microtubule associated serine/threonine kinase family member 4 [Source:HGNC Symbol;Acc:HGNC:19037]	MAST4	17.0528	16.6613	14.0577	15.0733	16.2351	17.6613	17.2283	17.3308	13.1277	16.8188	17.2316	16.7793	20.7167	20.317	20.807	21.547	19.7929	20.0819
760	ENSG00000069248	protein_coding	nucleoporin 133 [Source:HGNC Symbol;Acc:HGNC:18016]	NUP133	164.822	174.176	165.6	169.733	168.211	166.741	165.726	167.374	165.766	163.461	160.315	167.057	163.185	161.991	154.505	152.223	162.931	164.299
761	ENSG00000069275	protein_coding	nuclear casein kinase and cyclin dependent kinase substrate 1 [Source:HGNC Symbol;Acc:HGNC:29923]	NUCKS1	1421.47	1407.17	1381.93	1398.7	1443.29	1448.23	1422.88	1403.73	1403.5	1417.64	1469.18	1416.62	1583.88	1550.3	1531.72	1602.2	1593.97	1579.03
762	ENSG00000069329	protein_coding	VPS35 retromer complex component [Source:HGNC Symbol;Acc:HGNC:13487]	VPS35	161.104	162.974	158.234	159.453	167.683	159.53	162.576	161.507	162.115	156.779	167.623	157.589	165.955	163.408	160.782	151.526	162.336	159.502
763	ENSG00000069345	protein_coding	DnaJ heat shock protein family (Hsp40) member A2 [Source:HGNC Symbol;Acc:HGNC:14884]	DNAJA2	78.4683	84.5008	88.1701	76.3482	85.7386	82.8307	88.713	86.3171	88.3206	83.7759	86.7617	76.48	86.7995	81.7583	80.3048	77.9409	77.6426	80.6622
764	ENSG00000069424	protein_coding	potassium voltage-gated channel subfamily A regulatory beta subunit 2 [Source:HGNC Symbol;Acc:HGNC:6229]	KCNAB2	12.2446	13.6475	12.5395	14.1493	12.2964	14.345	13.7569	13.2173	12.9723	13.9551	13.9462	14.8331	14.8451	16.0684	14.0576	16.8427	15.2907	16.6977
765	ENSG00000069482	protein_coding	galanin and GMAP prepropeptide [Source:HGNC Symbol;Acc:HGNC:4114]	GAL	78.3401	71.4219	72.3692	79.5823	71.5209	70.6837	67.6919	73.7741	76.4358	66.0025	67.9879	70.957	49.7422	52.9985	53.1783	49.5407	55.3013	53.031
766	ENSG00000069493	protein_coding	C-type lectin domain family 2 member D [Source:HGNC Symbol;Acc:HGNC:14351]	CLEC2D	10.7061	10.1219	13.4954	10.0489	9.99083	9.21627	11.6355	10.7222	11.9625	11.8641	8.51525	10.5199	9.36128	10.7849	11.4353	12.4868	10.0664	10.3756
767	ENSG00000069509	protein_coding	FUN14 domain containing 1 [Source:HGNC Symbol;Acc:HGNC:28746]	FUNDC1	13.7832	17.8555	18.1064	15.6508	18.3005	15.8103	18.7712	16.1845	16.7009	17.3188	17.2987	16.5689	16.4515	16.6676	15.1324	14.9261	15.2057	17.9249
768	ENSG00000069535	protein_coding	monoamine oxidase B [Source:HGNC Symbol;Acc:HGNC:6834]	MAOB	9.16746	9.1552	10.4027	10.5686	9.6546	11.0287	9.64272	10.7896	10.2536	10.7277	9.92328	11.6771	13.2387	13.236	11.5212	14.7518	12.6998	11.9747
769	ENSG00000069667	protein_coding	RAR related orphan receptor A [Source:HGNC Symbol;Acc:HGNC:10258]	RORA	11.0266	12.2259	12.0897	12.3589	12.0082	10.9901	11.4427	11.3966	10.0982	12.7732	12.203	13.6759	17.5593	18.3561	17.2389	16.8427	18.9434	17.9993
770	ENSG00000069849	protein_coding	ATPase Na+/K+ transporting subunit beta 3 [Source:HGNC Symbol;Acc:HGNC:806]	ATP1B3	80.4557	80.6908	79.0607	80.2754	79.5423	80.4399	80.2274	78.4272	78.9992	80.003	79.2522	77.1112	71.0682	68.2499	63.7968	62.7244	63.3713	69.5428
771	ENSG00000069869	protein_coding	NEDD4 E3 ubiquitin protein ligase [Source:HGNC Symbol;Acc:HGNC:7727]	NEDD4	25.2586	27.4087	27.4407	25.1799	27.4748	23.5227	26.421	25.4905	24.5465	25.9555	24.2048	25.2479	21.9907	21.4064	23.7733	20.2693	23.1059	21.6438
772	ENSG00000069943	protein_coding	phosphatidylinositol glycan anchor biosynthesis class B [Source:HGNC Symbol;Acc:HGNC:8959]	PIGB	8.14173	7.33553	6.91641	6.75699	7.82935	6.82544	8.09988	7.14813	6.9134	6.00023	7.64361	6.78536	8.53039	7.78909	7.00732	8.47941	7.77276	9.96656
773	ENSG00000069956	protein_coding	mitogen-activated protein kinase 6 [Source:HGNC Symbol;Acc:HGNC:6879]	MAPK6	121.485	115.663	119.603	112.443	121.283	109.708	116.227	116.123	116.906	119.232	123.84	117.613	106.63	110.627	109.151	112.091	117.144	111.343
774	ENSG00000069966	protein_coding	G protein subunit beta 5 [Source:HGNC Symbol;Acc:HGNC:4401]	GNB5	25.8997	26.2714	25.1352	24.6601	29.252	26.0292	27.1925	25.6928	28.5857	27.1374	27.222	27.5097	25.2034	27.9972	25.8798	27.2386	27.6082	27.3708
775	ENSG00000069974	protein_coding	RAB27A, member RAS oncogene family [Source:HGNC Symbol;Acc:HGNC:9766]	RAB27A	6.73135	6.53943	8.15349	7.04575	7.20492	7.21105	6.36419	7.95736	6.13661	7.00026	7.10722	7.41656	6.42549	5.93714	5.76062	6.3886	6.28617	6.2105
776	ENSG00000069998	protein_coding	haloacid dehalogenase like hydrolase domain containing 5 [Source:HGNC Symbol;Acc:HGNC:1843]	HDHD5	55.0689	51.9742	53.4756	59.3691	51.7313	54.6806	52.3278	54.7574	52.1224	53.8202	53.7064	54.8089	51.2378	49.458	47.3747	52.038	49.3974	49.3865
777	ENSG00000070010	protein_coding	ubiquitin recognition factor in ER associated degradation 1 [Source:HGNC Symbol;Acc:HGNC:12520]	UFD1	75.8399	78.0182	75.4057	76.637	72.3374	78.7432	78.3631	78.8992	74.8822	78.4575	78.9169	74.376	63.5348	61.3868	63.3239	66.4414	60.653	63.5554
778	ENSG00000070018	protein_coding	LDL receptor related protein 6 [Source:HGNC Symbol;Acc:HGNC:6698]	LRP6	131.422	123.851	121.852	119.547	129.16	125.326	124.391	120.844	115.741	132.414	127.796	126.555	137.539	140.04	147.455	154.488	149.636	150.317
779	ENSG00000070047	protein_coding	PHD and ring finger domains 1 [Source:HGNC Symbol;Acc:HGNC:24351]	PHRF1	131.55	127.377	135.067	135.602	125.702	132.498	129.405	135.005	138.812	127.232	126.053	128.186	120.755	122.12	120.5	133.173	123.217	117.033
780	ENSG00000070061	protein_coding	elongator acetyltransferase complex subunit 1 [Source:HGNC Symbol;Acc:HGNC:5959]	ELP1	129.562	128.741	130.4	130.751	136.461	133.964	133.969	131.566	130.811	135.46	131.752	135.707	122.86	121.521	124.24	116.621	121.264	126.888
781	ENSG00000070081	protein_coding	nucleobindin 2 [Source:HGNC Symbol;Acc:HGNC:8044]	NUCB2	40.9651	36.3365	38.1808	36.6726	38.1861	35.6696	37.3495	35.6732	31.0715	40.6379	34.5974	37.0828	28.5824	33.9343	35.4235	31.943	31.9405	32.4657
782	ENSG00000070087	protein_coding	profilin 2 [Source:HGNC Symbol;Acc:HGNC:8882]	PFN2	322.207	315.769	312.25	304.296	321.676	323.572	320.974	325.577	329.979	315.239	319.825	317.545	280.728	283.185	271.652	272.038	278.885	288.026
783	ENSG00000070182	protein_coding	spectrin beta, erythrocytic [Source:HGNC Symbol;Acc:HGNC:11274]	SPTB	14.3602	16.7751	17.9377	16.0551	15.4185	16.3502	16.4569	16.5216	17.8661	14.7278	16.5612	14.1493	13.9034	15.5782	15.8632	14.868	16.3525	14.5408
784	ENSG00000070214	protein_coding	solute carrier family 44 member 1 [Source:HGNC Symbol;Acc:HGNC:18798]	SLC44A1	107.445	100.48	99.1914	103.838	102.742	97.9084	101.377	101.288	104.555	107.049	103.524	101.412	94.8314	94.1228	90.8803	93.68	88.7708	86.9471
785	ENSG00000070269	protein_coding	transmembrane protein 260 [Source:HGNC Symbol;Acc:HGNC:20185]	TMEM260	21.7326	24.1674	22.5486	24.9489	26.5141	23.9469	26.2925	21.4444	23.6143	24.1827	25.3446	25.3531	28.6931	28.5963	28.2013	24.6832	29.3071	27.1105
786	ENSG00000070366	protein_coding	SMG6 nonsense mediated mRNA decay factor [Source:HGNC Symbol;Acc:HGNC:17809]	SMG6	69.1726	68.863	67.9832	63.354	64.8923	69.2955	70.4561	67.8398	69.2117	68.3208	65.9764	68.9582	67.2461	68.032	69.9013	74.9789	67.1515	66.5305
787	ENSG00000070367	protein_coding	exocyst complex component 5 [Source:HGNC Symbol;Acc:HGNC:10696]	EXOC5	162.065	157.117	156.884	153.332	162.303	149.427	153.383	143.3	150.308	152.688	162.058	151.382	160.416	165.477	165.338	148.912	161.571	157.42
788	ENSG00000070371	protein_coding	clathrin heavy chain like 1 [Source:HGNC Symbol;Acc:HGNC:2093]	CLTCL1	16.9245	15.6946	17.7127	14.9	15.7548	16.0417	15.1069	16.5891	15.8464	15.4551	14.8849	16.4111	15.3436	14.2709	14.8315	14.9261	14.0164	13.1276
789	ENSG00000070404	protein_coding	follistatin like 3 [Source:HGNC Symbol;Acc:HGNC:3973]	FSTL3	5.25686	5.40213	4.94832	6.17947	5.04345	6.47838	5.27135	5.05764	5.59286	5.54566	5.09574	5.36517	3.93284	5.01117	4.77186	3.89124	4.37483	3.90481
790	ENSG00000070413	protein_coding	DiGeorge syndrome critical region gene 2 [Source:HGNC Symbol;Acc:HGNC:2845]	DGCR2	82.5071	83.136	73.4938	83.6827	77.0446	83.6405	72.7704	83.3499	83.8929	79.3666	75.6315	83.7388	68.1878	72.2806	67.107	71.4361	66.5994	71.4022
791	ENSG00000070423	protein_coding	ring finger protein 126 [Source:HGNC Symbol;Acc:HGNC:21151]	RNF126	32.8875	31.3324	33.4574	37.0768	32.7584	33.6644	30.1496	33.6502	35.6545	33.6376	30.5744	34.2424	29.5794	33.7164	29.104	31.1299	31.7706	33.507
792	ENSG00000070444	protein_coding	MAX network transcriptional repressor [Source:HGNC Symbol;Acc:HGNC:7188]	MNT	39.4265	42.0798	39.5866	44.5846	39.6271	44.2689	37.2852	39.4496	39.9268	39.9106	38.3521	41.2908	44.8123	42.6494	45.3542	47.2175	48.2506	46.1883
793	ENSG00000070476	protein_coding	ZXD family zinc finger C [Source:HGNC Symbol;Acc:HGNC:28160]	ZXDC	36.0288	34.6874	32.2766	32.7454	30.3567	36.1324	32.0781	36.6173	36.1982	34.9559	34.7315	35.1892	35.5618	37.7471	36.4553	34.0919	34.9137	33.916
794	ENSG00000070495	protein_coding	jumonji domain containing 6, arginine demethylase and lysine hydroxylase [Source:HGNC Symbol;Acc:HGNC:19355]	JMJD6	51.4788	52.7703	48.9771	47.2989	46.4958	44.5774	53.9992	54.0156	53.909	48.3655	43.3808	48.5495	33.9	32.6815	35.0796	33.5692	31.983	30.6806
795	ENSG00000070501	protein_coding	DNA polymerase beta [Source:HGNC Symbol;Acc:HGNC:9174]	POLB	30.3872	26.8401	28.8465	26.6815	26.322	28.6514	29.121	27.0415	31.1491	29.7284	29.6358	26.7733	32.9029	27.0167	28.7601	30.4329	29.9018	28.2634
796	ENSG00000070540	protein_coding	WD repeat domain, phosphoinositide interacting 1 [Source:HGNC Symbol;Acc:HGNC:25471]	WIPI1	5.19276	4.03739	3.37386	3.34962	3.74656	3.89474	3.59995	5.19251	4.58304	3.95469	4.15705	3.41898	3.43431	4.13966	4.29897	4.00739	3.73772	4.31388
797	ENSG00000070610	protein_coding	glucosylceramidase beta 2 [Source:HGNC Symbol;Acc:HGNC:18986]	GBA2	81.3532	86.1498	85.3586	88.8227	82.1361	83.6405	83.0559	83.3499	84.5144	82.9577	80.0568	90.1559	77.4383	73.8602	77.2095	78.3474	81.1255	82.8191
798	ENSG00000070614	protein_coding	N-deacetylase and N-sulfotransferase 1 [Source:HGNC Symbol;Acc:HGNC:7680]	NDST1	200.402	201.471	188.992	202.305	190.93	205.11	188.097	203.654	205.615	192.462	188.744	201.194	193.596	199.956	184.856	192.819	193.724	192.34
799	ENSG00000070669	protein_coding	asparagine synthetase (glutamine-hydrolyzing) [Source:HGNC Symbol;Acc:HGNC:753]	ASNS	11.6677	10.2356	10.1778	9.64459	9.0782	8.44503	9.77129	10.5199	9.70983	8.50032	8.64935	10.4147	6.48088	7.84356	7.17928	5.98205	7.13565	7.2146
800	ENSG00000070718	protein_coding	adaptor related protein complex 3 subunit mu 2 [Source:HGNC Symbol;Acc:HGNC:570]	AP3M2	56.9921	53.4527	50.2142	51.8613	58.2638	56.3002	57.7277	56.7804	55.3849	55.9567	51.4267	55.1771	47.3049	45.3728	50.4269	46.7529	51.2238	54.9276
801	ENSG00000070756	protein_coding	poly(A) binding protein cytoplasmic 1 [Source:HGNC Symbol;Acc:HGNC:8554]	PABPC1	1212.8	1238.97	1260.08	1213.43	1216.29	1238.99	1231.44	1234.94	1250.16	1196.91	1240.95	1201.59	1433.05	1449.59	1433.71	1516.65	1466.29	1416.07
802	ENSG00000070761	protein_coding	cilia and flagella associated protein 20 [Source:HGNC Symbol;Acc:HGNC:29523]	CFAP20	47.1195	45.2073	48.8647	49.7823	47.7927	49.2434	43.9708	48.5534	46.2965	45.229	45.9958	44.9728	44.5907	46.5167	44.7523	45.4171	43.4085	39.6431
803	ENSG00000070770	protein_coding	casein kinase 2 alpha 2 [Source:HGNC Symbol;Acc:HGNC:2459]	CSNK2A2	121.613	115.037	120.672	113.425	118.257	117.768	121.498	124.485	117.683	116.232	112.374	113.721	134.991	130.617	134.472	136.077	124.407	125.065
804	ENSG00000070778	protein_coding	protein tyrosine phosphatase non-receptor type 21 [Source:HGNC Symbol;Acc:HGNC:9651]	PTPN21	77.2503	76.5397	80.9726	75.4242	76.6604	75.8896	75.2775	75.7972	80.6304	78.1848	75.7656	81.214	83.6422	83.6102	85.9365	84.2133	83.9288	82.8563
805	ENSG00000070785	protein_coding	eukaryotic translation initiation factor 2B subunit gamma [Source:HGNC Symbol;Acc:HGNC:3259]	EIF2B3	20.8351	21.0399	21.2553	19.6357	20.3659	21.9031	20.5068	21.5118	21.1286	20.6371	21.7239	19.5671	16.2853	15.7416	16.723	18.8754	15.1208	15.0614
806	ENSG00000070814	protein_coding	treacle ribosome biogenesis factor 1 [Source:HGNC Symbol;Acc:HGNC:11654]	TCOF1	236.815	233.884	229.141	232.106	217.733	229.018	237.918	230.966	242.435	226.827	225.822	226.494	204.508	207.745	205.233	211.346	195.848	194.162
807	ENSG00000070831	protein_coding	cell division cycle 42 [Source:HGNC Symbol;Acc:HGNC:1736]	CDC42	158.091	148.473	156.491	144.727	146.452	152.011	153.705	155.438	152.25	151.46	157.968	150.12	158.809	156.544	155.881	165	161.444	159.576
808	ENSG00000070882	protein_coding	oxysterol binding protein like 3 [Source:HGNC Symbol;Acc:HGNC:16370]	OSBPL3	13.5268	15.6378	15.9134	13.9182	13.5933	13.5737	13.6284	13.487	14.0598	15.1824	14.6167	14.8857	10.1922	11.2751	12.1661	11.3833	11.8927	11.7144
809	ENSG00000070950	protein_coding	RAD18 E3 ubiquitin protein ligase [Source:HGNC Symbol;Acc:HGNC:18278]	RAD18	74.75	70.4552	70.1762	68.3784	76.6604	74.4628	73.2846	70.9418	72.3965	77.7302	77.3077	75.1124	73.0623	71.627	73.4694	72.0169	73.2253	67.7949
810	ENSG00000070961	protein_coding	ATPase plasma membrane Ca2+ transporting 1 [Source:HGNC Symbol;Acc:HGNC:814]	ATP2B1	110.651	104.233	105.995	99.5645	108.938	96.8286	101.699	95.8929	91.2724	100.686	107.882	99.0453	94.5544	99.951	99.1773	87.8722	97.1807	98.5127
811	ENSG00000071051	protein_coding	NCK adaptor protein 2 [Source:HGNC Symbol;Acc:HGNC:7665]	NCK2	50.0043	54.4194	52.0136	55.1532	51.5872	57.1871	53.2921	55.9712	57.2492	53.7293	51.762	56.2291	50.85	54.3058	53.3502	56.6262	54.027	51.9897
812	ENSG00000071054	protein_coding	mitogen-activated protein kinase kinase kinase kinase 4 [Source:HGNC Symbol;Acc:HGNC:6866]	MAP4K4	371.378	377.467	380.346	361.817	373.503	375.862	383.78	377.3	375.809	371.378	370.782	362.57	436.656	424.642	426.243	441.22	422.83	424.137
813	ENSG00000071073	protein_coding	alpha-1,3-mannosyl-glycoprotein 4-beta-N-acetylglucosaminyltransferase A [Source:HGNC Symbol;Acc:HGNC:7047]	MGAT4A	29.1692	31.0481	29.0152	28.7028	28.2913	27.6102	28.7996	29.4018	28.4304	30.7284	33.6587	27.8253	31.1858	31.2108	30.3507	27.7033	29.6044	27.2593
814	ENSG00000071082	protein_coding	ribosomal protein L31 [Source:HGNC Symbol;Acc:HGNC:10334]	RPL31	407.984	405.16	392.492	441.976	427.252	434.784	427.944	409.534	417.134	423.607	465.389	432.527	489.445	433.956	439.699	420.253	475.752	466.346
815	ENSG00000071127	protein_coding	WD repeat domain 1 [Source:HGNC Symbol;Acc:HGNC:12754]	WDR1	135.14	138.636	117.916	119.951	119.794	120.159	126.77	140.198	132.52	118.732	126.589	120.453	99.3736	97.3364	92.5139	97.1647	93.9102	94.6079
816	ENSG00000071189	protein_coding	sorting nexin 13 [Source:HGNC Symbol;Acc:HGNC:21335]	SNX13	58.2102	59.4803	60.4483	58.0986	62.875	57.1486	62.0991	54.1505	56.3947	59.275	63.0263	59.2273	61.0976	63.7834	61.6043	55.8131	59.761	63.1463
817	ENSG00000071205	protein_coding	Rho GTPase activating protein 10 [Source:HGNC Symbol;Acc:HGNC:26099]	ARHGAP10	3.84649	5.11781	4.49848	4.1004	5.52377	3.85618	4.69279	4.04611	3.57322	5.0911	5.90033	4.41838	4.70833	3.92178	4.64289	4.5301	5.05442	4.9089
818	ENSG00000071242	protein_coding	ribosomal protein S6 kinase A2 [Source:HGNC Symbol;Acc:HGNC:10431]	RPS6KA2	82.2507	80.5202	75.1245	78.3695	77.6691	78.3575	79.3274	81.3943	79.2322	78.9121	73.3518	77.0586	73.0069	72.7164	74.2433	75.8501	77.1329	71.2163
819	ENSG00000071243	protein_coding	inhibitor of growth family member 3 [Source:HGNC Symbol;Acc:HGNC:14587]	ING3	28.464	27.8068	29.1276	27.952	29.9244	29.037	25.971	28.5925	26.1	30.0011	30.8426	27.8779	31.1304	30.2849	28.3302	29.9102	27.8205	31.0525
820	ENSG00000071246	protein_coding	vasohibin 1 [Source:HGNC Symbol;Acc:HGNC:19964]	VASH1	51.8635	50.7232	47.8525	50.0133	47.0722	50.4774	47.2493	52.532	49.7143	47.1836	46.264	47.5501	43.8152	42.7583	43.7635	44.4879	45.5322	43.3248
821	ENSG00000071282	protein_coding	LIM and cysteine rich domains 1 [Source:HGNC Symbol;Acc:HGNC:6633]	LMCD1	24.1688	21.3242	20.2994	19.6935	24.0164	24.1782	24.8139	23.6698	24.6241	21.1372	23.132	23.9855	21.7137	23.2039	21.3659	22.4762	20.5999	21.7182
822	ENSG00000071462	protein_coding	BUD23 rRNA methyltransferase and ribosome maturation factor [Source:HGNC Symbol;Acc:HGNC:16405]	BUD23	83.4687	83.7615	83.1656	84.3758	81.1274	82.1366	81.9631	86.3845	81.951	82.8213	78.0453	80.5302	68.0216	68.3588	68.5256	70.623	68.2559	71.4394
823	ENSG00000071537	protein_coding	SEL1L adaptor subunit of ERAD E3 ubiquitin ligase [Source:HGNC Symbol;Acc:HGNC:10717]	SEL1L	117.638	112.194	111.337	102.683	106.201	104.618	116.034	112.549	113.644	114.459	114.587	104.673	94.7206	94.1228	101.026	95.1901	92.1688	96.9508
824	ENSG00000071539	protein_coding	thyroid hormone receptor interactor 13 [Source:HGNC Symbol;Acc:HGNC:12307]	TRIP13	92.9567	91.8932	90.9254	93.8471	95.7774	93.9365	93.8558	95.1511	97.0206	91.7762	90.6505	95.4159	80.8726	79.6884	82.5403	83.6325	82.1449	84.2323
825	ENSG00000071553	protein_coding	ATPase H+ transporting accessory protein 1 [Source:HGNC Symbol;Acc:HGNC:868]	ATP6AP1	57.6973	55.8979	54.3753	59.1959	57.6394	61.0433	52.3278	56.8479	54.9965	53.2747	57.8635	56.7551	53.952	54.9049	50.9428	50.3537	54.5367	54.4442
826	ENSG00000071564	protein_coding	transcription factor 3 [Source:HGNC Symbol;Acc:HGNC:11633]	TCF3	261.241	265.671	251.577	268.143	243.094	260.446	245.375	262.728	262.398	245.509	240.774	260.526	258.128	257.367	252.78	260.248	258.497	257.978
827	ENSG00000071575	protein_coding	tribbles pseudokinase 2 [Source:HGNC Symbol;Acc:HGNC:30809]	TRIB2	77.8913	77.4496	80.9163	80.3909	78.5337	78.8203	78.4917	79.9782	79.776	80.7758	81.4648	83.5284	92.4495	93.5781	88.4299	86.943	92.2962	88.9924
828	ENSG00000071626	protein_coding	DAZ associated protein 1 [Source:HGNC Symbol;Acc:HGNC:2683]	DAZAP1	199.953	206.93	207.155	203.865	196.454	203.876	195.104	202.373	194.43	199.735	194.912	199.932	191.158	192.058	187.392	196.304	186.971	187.319
829	ENSG00000071655	protein_coding	methyl-CpG binding domain protein 3 [Source:HGNC Symbol;Acc:HGNC:6918]	MBD3	99.3676	97.1247	87.664	106.379	94.8168	97.9469	91.4772	94.4767	105.41	96.5036	86.8287	103.727	84.1961	83.5557	78.2843	89.3823	83.1643	86.0173
830	ENSG00000071794	protein_coding	helicase like transcription factor [Source:HGNC Symbol;Acc:HGNC:11099]	HLTF	138.025	128.855	133.661	129.018	134.588	124.786	128.441	118.214	120.247	131.369	140.602	126.66	138.425	143.417	144.445	142.64	138.763	144.255
831	ENSG00000071859	protein_coding	family with sequence similarity 50 member A [Source:HGNC Symbol;Acc:HGNC:18786]	FAM50A	32.8233	32.8109	34.3571	33.785	31.0292	35.4768	32.721	35.2686	34.4116	34.4104	34.9326	33.6112	29.2471	29.7402	29.7059	30.6072	29.3071	29.3418
832	ENSG00000071889	protein_coding	FAM3 metabolism regulating signaling molecule A [Source:HGNC Symbol;Acc:HGNC:13749]	FAM3A	12.8857	12.1122	12.8207	12.0702	12.4405	10.9515	11.1213	11.7337	14.5259	11.6368	12.203	13.4655	10.9123	11.1662	11.8222	11.6737	10.4486	11.7888
833	ENSG00000071894	protein_coding	cleavage and polyadenylation specific factor 1 [Source:HGNC Symbol;Acc:HGNC:2324]	CPSF1	111.42	105.825	112.406	126.188	110.235	122.009	102.856	108.908	108.828	109.822	108.62	121.4	103.971	105.18	102.745	105.18	105.123	109.892
834	ENSG00000071967	protein_coding	cytochrome b reductase 1 [Source:HGNC Symbol;Acc:HGNC:20797]	CYBRD1	2.50022	2.27458	2.53039	2.36783	2.44967	2.69932	2.89281	2.09049	2.79643	2.13644	3.21836	2.62999	2.88039	2.39664	2.88031	3.13622	2.37855	2.26851
835	ENSG00000071994	protein_coding	programmed cell death 2 [Source:HGNC Symbol;Acc:HGNC:8762]	PDCD2	110.971	103.152	108.469	108.805	109.947	107.78	115.905	107.087	111.236	110.095	116.464	110.565	105.245	101.258	101.671	106.051	109.201	105.765
836	ENSG00000072041	protein_coding	solute carrier family 6 member 15 [Source:HGNC Symbol;Acc:HGNC:13621]	SLC6A15	87.9563	85.5812	91.6002	85.5308	90.4458	87.0339	84.7916	80.113	83.5822	91.458	91.9915	84.0018	108.513	109.538	108.42	102.624	108.606	107.438
837	ENSG00000072042	protein_coding	retinol dehydrogenase 11 [Source:HGNC Symbol;Acc:HGNC:17964]	RDH11	67.1212	60.6745	66.0714	60.3509	60.9056	62.0845	64.2205	60.6243	63.8518	62.4114	66.5128	60.3845	60.1005	60.1885	56.4025	58.9493	58.5293	59.5762
838	ENSG00000072062	protein_coding	protein kinase cAMP-activated catalytic subunit alpha [Source:HGNC Symbol;Acc:HGNC:9380]	PRKACA	99.624	91.552	88.7887	93.5006	85.1622	92.9339	90.063	93.1955	89.4858	92.0035	90.1812	90.1033	71.7883	74.0781	69.4714	73.0042	67.7462	70.4353
839	ENSG00000072071	protein_coding	adhesion G protein-coupled receptor L1 [Source:HGNC Symbol;Acc:HGNC:20973]	ADGRL1	198.799	191.008	191.972	206.81	177.962	191.922	185.14	197.45	193.342	182.734	178.887	190.937	155.098	154.747	154.72	161.748	150.231	153.775
840	ENSG00000072110	protein_coding	actinin alpha 1 [Source:HGNC Symbol;Acc:HGNC:163]	ACTN1	134.883	127.604	126.295	126.246	117.728	127.562	121.948	135.612	132.753	116.186	120.89	121.453	133.994	123.536	127.894	124.461	119.734	115.694
841	ENSG00000072121	protein_coding	zinc finger FYVE-type containing 26 [Source:HGNC Symbol;Acc:HGNC:20761]	ZFYVE26	42.6319	40.317	39.6428	40.8307	38.8585	42.4951	39.0209	38.9101	42.0241	39.0469	40.1625	41.9746	43.7598	41.8868	42.1299	44.1975	42.1343	46.2255
842	ENSG00000072133	protein_coding	ribosomal protein S6 kinase A6 [Source:HGNC Symbol;Acc:HGNC:10435]	RPS6KA6	41.1574	47.9368	45.2659	43.1408	45.6792	45.1944	44.7422	42.9562	41.4027	45.229	43.9843	44.9728	67.4123	64.6549	68.3107	57.1489	64.5181	62.4025
843	ENSG00000072134	protein_coding	epsin 2 [Source:HGNC Symbol;Acc:HGNC:18639]	EPN2	77.2503	74.0945	74.5622	75.3664	73.6823	72.8046	75.0846	80.9223	74.8045	74.6846	71.2063	70.168	76.6628	76.6926	79.0151	78.9863	75.8162	72.2575
844	ENSG00000072135	protein_coding	protein tyrosine phosphatase non-receptor type 18 [Source:HGNC Symbol;Acc:HGNC:9649]	PTPN18	20.0017	21.2105	22.886	21.3683	21.7589	21.7488	20.3783	21.5793	24.0804	19.6826	18.6397	19.9353	21.4922	21.3519	20.1192	22.0116	22.0016	21.3091
845	ENSG00000072182	protein_coding	acid sensing ion channel subunit family member 4 [Source:HGNC Symbol;Acc:HGNC:21263]	ASIC4	5.76973	6.99434	7.14133	5.77521	5.61984	5.47577	5.39992	5.73199	4.66072	5.90931	5.96738	4.89177	5.81618	5.01117	5.93258	5.28511	5.9039	5.05766
846	ENSG00000072195	protein_coding	striated muscle enriched protein kinase [Source:HGNC Symbol;Acc:HGNC:16901]	SPEG	45.2603	45.2642	46.6717	46.0284	40.7799	43.9219	40.1137	42.0796	40.2375	39.7288	42.174	44.1838	44.8677	45.3728	50.8568	44.4879	48.5904	51.1716
847	ENSG00000072210	protein_coding	aldehyde dehydrogenase 3 family member A2 [Source:HGNC Symbol;Acc:HGNC:403]	ALDH3A2	61.672	63.006	68.9954	66.7036	66.6215	63.2799	65.7633	66.2888	69.134	70.1845	70.804	65.96	71.1235	69.6661	68.0527	63.5375	68.1709	65.5264
848	ENSG00000072274	protein_coding	transferrin receptor [Source:HGNC Symbol;Acc:HGNC:11763]	TFRC	303.808	300.302	290.32	289.396	295.162	297.041	298.988	305.077	289.974	285.374	304.068	284.67	256.687	265.265	265.591	248.691	256.713	266.903
849	ENSG00000072310	protein_coding	sterol regulatory element binding transcription factor 1 [Source:HGNC Symbol;Acc:HGNC:11289]	SREBF1	38.0802	36.109	36.6626	42.3323	37.994	38.369	33.9424	31.2899	40.1599	34.274	34.5974	39.292	48.1358	45.6996	43.7205	45.359	48.6753	44.8867
850	ENSG00000072364	protein_coding	AF4/FMR2 family member 4 [Source:HGNC Symbol;Acc:HGNC:17869]	AFF4	242.393	250.204	242.299	238.863	248.57	245.793	244.861	240.609	245.853	250.555	245.065	247.166	296.293	290.702	301.358	271.283	276.846	277.985
851	ENSG00000072401	protein_coding	ubiquitin conjugating enzyme E2 D1 [Source:HGNC Symbol;Acc:HGNC:12474]	UBE2D1	34.1055	31.2187	34.2446	31.4749	34.4876	34.0115	34.7138	36.2801	34.4893	35.9559	36.0725	32.8748	31.8505	32.8449	32.9301	29.4456	31.983	32.131
852	ENSG00000072415	protein_coding	membrane palmitoylated protein 5 [Source:HGNC Symbol;Acc:HGNC:18669]	MPP5	37.0545	36.7345	39.3054	37.0191	37.8499	36.3638	38.1209	38.3032	36.1206	37.0014	38.9556	36.0308	37.9436	34.9147	38.5188	44.0232	39.6283	38.6762
853	ENSG00000072422	protein_coding	Rho related BTB domain containing 1 [Source:HGNC Symbol;Acc:HGNC:18738]	RHOBTB1	42.9524	40.317	44.8723	42.39	43.4217	45.85	42.6208	43.4283	41.4027	45.0472	43.7831	40.7648	47.5265	46.0809	47.1167	42.7455	48.6328	44.7008
854	ENSG00000072501	protein_coding	structural maintenance of chromosomes 1A [Source:HGNC Symbol;Acc:HGNC:11111]	SMC1A	759.425	749.589	767.159	726.867	731.492	752.88	757.532	762.153	721.246	756.938	744.38	743.181	710.959	711.368	685.858	712.909	691.733	699.89
855	ENSG00000072506	protein_coding	hydroxysteroid 17-beta dehydrogenase 10 [Source:HGNC Symbol;Acc:HGNC:4800]	HSD17B10	65.6467	65.1668	61.0106	70.573	62.8269	69.7583	64.9276	67.9073	66.1822	61.8205	69.3289	66.5386	55.8907	55.3952	55.6717	56.7423	57.425	57.8283
856	ENSG00000072518	protein_coding	microtubule affinity regulating kinase 2 [Source:HGNC Symbol;Acc:HGNC:3332]	MARK2	57.8896	61.9255	55.3875	63.9315	56.5827	59.8093	52.9064	59.4779	54.9965	55.0475	51.2926	56.9655	56.1123	56.648	50.4269	48.8437	49.3974	48.9031
857	ENSG00000072571	protein_coding	hyaluronan mediated motility receptor [Source:HGNC Symbol;Acc:HGNC:5012]	HMMR	86.8024	96.2149	95.0865	88.4184	94.9128	87.5352	92.2487	80.5176	80.6304	96.0945	98.4953	96.3627	136.265	144.125	146.595	132.883	147.597	143.92
858	ENSG00000072609	protein_coding	checkpoint with forkhead and ring finger domains [Source:HGNC Symbol;Acc:HGNC:20455]	CHFR	55.133	56.1822	59.1549	54.8067	54.4692	55.3747	55.0921	58.4663	57.4045	57.7295	55.3826	57.9123	44.9231	44.12	44.8383	46.7529	44.8102	43.5851
859	ENSG00000072682	protein_coding	prolyl 4-hydroxylase subunit alpha 2 [Source:HGNC Symbol;Acc:HGNC:8547]	P4HA2	10.6419	9.61011	9.22187	9.52909	9.55853	9.37051	10.3498	8.49684	8.85537	9.81855	9.92328	8.41596	9.63824	8.38826	8.64093	8.01478	8.40987	9.33435
860	ENSG00000072736	protein_coding	nuclear factor of activated T cells 3 [Source:HGNC Symbol;Acc:HGNC:7777]	NFATC3	90.2642	92.4618	86.5956	89.6889	90.3017	94.3607	88.4559	95.1511	85.7572	83.685	89.1084	87.3155	87.6858	82.1395	85.3776	79.2186	81.168	83.6745
861	ENSG00000072756	protein_coding	tRNA nucleotidyl transferase 1 [Source:HGNC Symbol;Acc:HGNC:17341]	TRNT1	46.4143	46.3446	48.9209	47.1834	48.6572	43.9604	48.4064	44.0352	43.8884	48.8655	48.4095	43.3422	38.6083	38.4008	42.5598	41.2936	41.5397	38.9737
862	ENSG00000072778	protein_coding	acyl-CoA dehydrogenase very long chain [Source:HGNC Symbol;Acc:HGNC:92]	ACADVL	66.2878	69.2611	77.6549	82.1812	75.8438	80.3628	72.1275	73.3695	72.2411	78.3666	76.235	80.5302	79.5985	75.4943	78.2413	79.4509	82.782	84.0463
863	ENSG00000072786	protein_coding	serine/threonine kinase 10 [Source:HGNC Symbol;Acc:HGNC:11388]	STK10	19.9376	20.0732	17.2067	20.271	18.3005	19.7051	17.6783	19.4213	19.4973	19.728	17.2316	17.3053	19.6088	18.5195	17.8407	18.585	18.6886	20.5653
864	ENSG00000072803	protein_coding	F-box and WD repeat domain containing 11 [Source:HGNC Symbol;Acc:HGNC:13607]	FBXW11	126.101	120.439	121.515	123.474	125.846	125.326	124.005	122.867	126.072	121.641	125.918	120.243	129.562	129.255	125.53	125.391	129.546	126.739
865	ENSG00000072832	protein_coding	collapsin response mediator protein 1 [Source:HGNC Symbol;Acc:HGNC:2365]	CRMP1	425.806	422.049	414.534	431.292	406.069	446.623	415.987	416.952	417.678	416.016	423.215	427.057	471.941	451.659	442.751	464.161	471.59	458.499
866	ENSG00000072840	protein_coding	EvC ciliary complex subunit 1 [Source:HGNC Symbol;Acc:HGNC:3497]	EVC	26.4125	23.6557	24.6854	21.7725	21.1825	24.3325	22.6925	27.8507	22.8375	22.7281	20.5171	22.8283	18.6672	19.4455	18.6575	19.4562	19.0709	20.7513
867	ENSG00000072849	protein_coding	derlin 2 [Source:HGNC Symbol;Acc:HGNC:17943]	DERL2	60.7104	61.5275	58.199	54.9222	57.9276	57.8427	60.942	58.8035	62.9197	65.3661	62.7581	57.5967	55.6691	54.9594	54.21	57.265	58.4443	56.2664
868	ENSG00000072864	protein_coding	nudE neurodevelopment protein 1 [Source:HGNC Symbol;Acc:HGNC:17619]	NDE1	44.5551	47.3113	45.3221	43.083	42.7492	45.7728	46.285	46.5303	44.2768	45.6381	44.1184	44.026	58.6049	59.4259	58.9389	58.5428	57.8072	57.6424
869	ENSG00000072952	protein_coding	inositol 1,4,5-triphosphate receptor associated 1 [Source:HGNC Symbol;Acc:HGNC:7237]	IRAG1	10.1932	10.5768	10.1778	10.6264	9.79869	9.29339	11.2498	10.1827	10.9527	10.2277	9.45394	10.5725	10.9676	11.3296	13.3698	11.0929	11.2556	10.8219
870	ENSG00000072954	protein_coding	transmembrane protein 38A [Source:HGNC Symbol;Acc:HGNC:28462]	TMEM38A	7.116	6.31197	4.83586	6.23722	6.19623	6.94112	5.0785	6.1366	4.97143	6.45479	5.43099	6.99576	4.43137	4.84776	4.42794	3.83316	3.99256	4.35107
871	ENSG00000072958	protein_coding	adaptor related protein complex 1 subunit mu 1 [Source:HGNC Symbol;Acc:HGNC:13667]	AP1M1	94.1107	89.5617	82.6032	95.5219	87.4678	92.6254	84.9202	96.3649	90.5733	88.3215	87.9015	89.1565	83.753	84.3728	82.4973	83.3421	84.9057	84.9761
872	ENSG00000073008	protein_coding	PVR cell adhesion molecule [Source:HGNC Symbol;Acc:HGNC:9705]	PVR	44.5551	45.5485	45.0972	41.7547	40.2995	39.5644	44.6136	41.3378	41.7134	43.7744	43.7831	42.0272	32.2382	34.0432	32.0703	34.2661	31.898	31.4616
873	ENSG00000073050	protein_coding	X-ray repair cross complementing 1 [Source:HGNC Symbol;Acc:HGNC:12828]	XRCC1	30.1949	30.65	31.3206	32.2834	28.4354	30.4638	29.571	28.66	27.9643	30.683	27.1549	30.613	32.1275	31.8645	31.5974	31.3622	32.8325	31.8707
874	ENSG00000073060	protein_coding	scavenger receptor class B member 1 [Source:HGNC Symbol;Acc:HGNC:1664]	SCARB1	50.1966	48.6192	49.4832	50.9951	48.8974	48.395	42.1708	47.6093	50.8795	48.0473	44.5877	49.4437	45.9755	45.9175	47.9335	46.3464	48.2081	46.1139
875	ENSG00000073111	protein_coding	minichromosome maintenance complex component 2 [Source:HGNC Symbol;Acc:HGNC:6944]	MCM2	272.011	269.766	262.092	284.891	270.377	274.676	253.025	272.708	289.897	267.328	271.482	275.833	233.146	234.926	224.578	238.12	240.998	239.569
876	ENSG00000073169	protein_coding	selenoprotein O [Source:HGNC Symbol;Acc:HGNC:30395]	SELENOO	22.6302	23.0302	22.6611	24.6024	21.8549	23.0214	23.5925	23.5349	24.9348	21.9099	20.5171	24.9323	20.8275	19.6634	21.4089	20.095	22.6812	22.4991
877	ENSG00000073350	protein_coding	LLGL scribble cell polarity complex component 2 [Source:HGNC Symbol;Acc:HGNC:6629]	LLGL2	4.67989	3.86679	4.61094	5.60195	5.04345	4.82022	4.37136	5.25995	4.7384	3.95469	4.96164	4.68137	4.04363	3.92178	4.04103	3.42661	4.54473	4.27669
878	ENSG00000073417	protein_coding	phosphodiesterase 8A [Source:HGNC Symbol;Acc:HGNC:8793]	PDE8A	38.529	42.7622	43.4665	43.1985	42.6051	36.9807	43.0708	39.3822	40.0045	43.0471	37.9499	36.662	38.9961	35.2416	38.7337	41.4678	39.9256	36.5564
879	ENSG00000073464	protein_coding	chloride voltage-gated channel 4 [Source:HGNC Symbol;Acc:HGNC:2022]	CLCN4	34.6825	35.1423	35.313	34.94	35.4002	38.369	36.0638	35.5384	40.0045	34.7286	35.402	36.7672	35.6726	35.9497	33.532	32.6399	38.0568	37.263
880	ENSG00000073536	protein_coding	notchless homolog 1 [Source:HGNC Symbol;Acc:HGNC:19889]	NLE1	30.3872	29.6833	30.196	30.6086	26.8984	32.6618	31.6281	29.0646	33.8679	30.7284	31.1779	30.613	29.0255	28.8687	30.0928	28.7487	29.7319	28.8212
881	ENSG00000073578	protein_coding	succinate dehydrogenase complex flavoprotein subunit A [Source:HGNC Symbol;Acc:HGNC:10680]	SDHA	9.42389	8.30223	8.32218	9.58684	9.6546	8.86921	8.99987	10.7896	9.39912	8.45486	8.78345	8.73155	7.92108	9.15082	7.99609	9.00211	7.39049	8.29307
882	ENSG00000073584	protein_coding	SWI/SNF related, matrix associated, actin dependent regulator of chromatin, subfamily e, member 1 [Source:HGNC Symbol;Acc:HGNC:11109]	SMARCE1	23.3995	25.3616	22.8298	24.4291	26.8503	24.7567	26.8068	25.1533	24.1581	26.1374	26.1492	25.6161	27.3637	27.0712	28.1583	27.529	27.6082	28.5237
883	ENSG00000073605	protein_coding	gasdermin B [Source:HGNC Symbol;Acc:HGNC:23690]	GSDMB	11.7318	12.6808	12.9331	11.2039	12.8728	11.9542	13.8212	11.7337	11.4964	13.4096	10.9961	11.3089	13.6265	12.5824	14.3156	11.2091	12.9121	12.9788
884	ENSG00000073614	protein_coding	lysine demethylase 5A [Source:HGNC Symbol;Acc:HGNC:9886]	KDM5A	162.642	170.821	146.144	160.262	172.198	171.446	164.89	155.775	161.028	171.506	169.903	173.789	181.465	181.546	192.121	186.895	186.164	189.848
885	ENSG00000073670	protein_coding	ADAM metallopeptidase domain 11 [Source:HGNC Symbol;Acc:HGNC:189]	ADAM11	7.05189	7.73358	8.88449	9.7601	8.35771	8.98489	7.97131	9.44093	8.46697	8.77306	8.24705	9.67835	6.86863	7.46228	7.39423	7.55016	7.64534	6.8799
886	ENSG00000073711	protein_coding	protein phosphatase 2 regulatory subunit B''alpha [Source:HGNC Symbol;Acc:HGNC:9307]	PPP2R3A	29.6821	32.4128	33.1763	31.4171	30.8851	31.505	29.6996	27.3787	27.7313	30.4557	32.5189	30.2448	33.3461	35.405	36.8852	33.8596	35.4659	35.9242
887	ENSG00000073712	protein_coding	fermitin family member 2 [Source:HGNC Symbol;Acc:HGNC:15767]	FERMT2	102.188	102.47	97.6731	98.4095	98.5153	95.9417	97.7129	99.6692	102.225	99.4583	99.9704	96.4153	83.753	82.5208	79.402	81.5998	76.6233	80.4019
888	ENSG00000073803	protein_coding	mitogen-activated protein kinase kinase kinase 13 [Source:HGNC Symbol;Acc:HGNC:6852]	MAP3K13	39.8752	39.9189	42.1732	37.8853	38.6664	39.7186	39.728	40.0565	35.8099	36.7741	34.2621	37.5562	43.1505	41.6145	43.4626	42.1067	41.7945	43.2132
889	ENSG00000073849	protein_coding	ST6 beta-galactoside alpha-2,6-sialyltransferase 1 [Source:HGNC Symbol;Acc:HGNC:10860]	ST6GAL1	11.4112	11.6572	10.1216	10.2799	10.9034	11.26	8.61416	11.8686	9.63215	10.7731	9.92328	11.5719	12.9618	13.8896	10.8334	13.0095	13.2094	11.7516
890	ENSG00000073910	protein_coding	FRY microtubule binding protein [Source:HGNC Symbol;Acc:HGNC:20367]	FRY	77.5067	73.6396	68.658	72.2478	72.8658	72.5347	75.6632	74.8531	80.1644	73.0028	73.553	76.1644	56.8324	59.8072	56.3165	57.4974	55.0464	56.3036
891	ENSG00000073921	protein_coding	phosphatidylinositol binding clathrin assembly protein [Source:HGNC Symbol;Acc:HGNC:15514]	PICALM	120.844	118.449	120.503	109.787	119.698	118.925	125.677	115.719	121.023	117.368	116.196	117.929	119.702	119.614	120.457	114.24	116.337	115.917
892	ENSG00000073969	protein_coding	N-ethylmaleimide sensitive factor, vesicle fusing ATPase [Source:HGNC Symbol;Acc:HGNC:8016]	NSF	49.6197	51.4624	51.3951	51.1106	51.9715	50.3231	53.4206	54.7574	54.6858	52.002	47.4038	50.3379	44.7015	43.0307	42.0869	41.7001	41.9644	42.5066
893	ENSG00000074054	protein_coding	cytoplasmic linker associated protein 1 [Source:HGNC Symbol;Acc:HGNC:17088]	CLASP1	218.609	228.88	216.433	220.035	221.479	223.62	214.454	216.602	221.384	215.281	217.172	229.703	233.478	237.704	235.885	239.688	236.708	236.036
894	ENSG00000074071	protein_coding	mitochondrial ribosomal protein S34 [Source:HGNC Symbol;Acc:HGNC:16618]	MRPS34	55.1971	55.3292	55.4437	58.0408	55.5259	56.5701	55.0278	58.6686	61.8322	57.9113	61.35	60.6475	53.2319	50.3295	50.8998	55.2323	51.3087	55.5598
895	ENSG00000074181	protein_coding	notch receptor 3 [Source:HGNC Symbol;Acc:HGNC:7883]	NOTCH3	45.7091	44.8662	41.4422	45.7396	39.579	45.3101	42.2351	43.9678	47.85	42.138	41.2353	46.2878	46.6402	44.3924	47.4177	45.5913	48.0382	46.6346
896	ENSG00000074201	protein_coding	chloride nucleotide-sensitive channel 1A [Source:HGNC Symbol;Acc:HGNC:2080]	CLNS1A	141.422	138.977	140.24	128.845	141.505	139.285	143.805	138.04	145.725	142.051	140.87	132.762	157.535	152.786	159.277	160.586	158.004	157.494
897	ENSG00000074211	protein_coding	protein phosphatase 2 regulatory subunit Bgamma [Source:HGNC Symbol;Acc:HGNC:9306]	PPP2R2C	33.7209	35.3698	34.4133	35.1133	30.741	31.8906	34.5852	33.9873	34.2563	34.3649	33.9269	34.1898	28.4162	28.215	24.0313	25.6705	24.4651	23.5776
898	ENSG00000074219	protein_coding	TEA domain transcription factor 2 [Source:HGNC Symbol;Acc:HGNC:11715]	TEAD2	18.5272	20.3007	20.1869	19.1737	17.9162	20.0136	19.864	18.3424	19.2643	21.5917	22.1933	19.1989	21.7691	24.1299	23.3004	23.9863	23.743	23.5404
899	ENSG00000074266	protein_coding	embryonic ectoderm development [Source:HGNC Symbol;Acc:HGNC:3188]	EED	30.9642	33.152	30.0836	30.8974	32.3261	33.0089	34.5852	33.4479	30.2947	33.1831	30.3062	29.6662	30.1333	26.9622	27.3415	26.3675	27.2684	27.7427
900	ENSG00000074319	protein_coding	tumor susceptibility 101 [Source:HGNC Symbol;Acc:HGNC:15971]	TSG101	64.4286	67.612	66.9148	68.5517	65.9971	68.2544	68.3347	65.547	61.5215	67.548	70.2676	67.012	66.3598	69.0125	66.3761	68.8226	69.5726	69.58
901	ENSG00000074356	protein_coding	nuclear cap binding subunit 3 [Source:HGNC Symbol;Acc:HGNC:24612]	NCBP3	119.305	123.339	130.568	123.936	127.623	122.202	121.434	125.497	127.471	123.186	114.52	120.769	131.169	127.022	130.861	131.721	129.546	126.59
902	ENSG00000074370	protein_coding	ATPase sarcoplasmic/endoplasmic reticulum Ca2+ transporting 3 [Source:HGNC Symbol;Acc:HGNC:813]	ATP2A3	3.84649	3.5256	3.31763	4.2159	3.89066	3.70193	4.30708	3.57407	4.27233	3.68196	4.29115	4.47098	3.98824	3.59497	3.82609	3.36853	3.99256	4.20232
903	ENSG00000074582	protein_coding	BCS1 homolog, ubiquinol-cytochrome c reductase complex chaperone [Source:HGNC Symbol;Acc:HGNC:1020]	BCS1L	19.8735	19.2771	20.8054	21.5415	21.1825	20.3221	18.6426	21.1072	20.1964	21.319	21.6569	21.1977	16.673	19.1187	18.3136	16.7846	17.287	16.6977
904	ENSG00000074603	protein_coding	dipeptidyl peptidase 8 [Source:HGNC Symbol;Acc:HGNC:16490]	DPP8	80.2633	80.6908	84.4026	78.1963	85.2102	79.9	83.8916	86.6542	82.5724	89.5488	82.5376	80.688	86.0794	86.9873	92.084	96.0032	95.4818	94.8682
905	ENSG00000074621	protein_coding	solute carrier family 24 member 1 [Source:HGNC Symbol;Acc:HGNC:10975]	SLC24A1	11.0907	10.6905	11.4149	11.4349	11.5759	11.6457	12.407	11.1942	12.817	12.6368	10.5938	12.6765	16.2853	14.7612	13.8427	15.0422	15.2907	15.3589
906	ENSG00000074657	protein_coding	zinc finger protein 532 [Source:HGNC Symbol;Acc:HGNC:30940]	ZNF532	178.156	170.935	181.738	169.791	174.119	174.106	176.269	179.715	176.874	171.87	173.59	180.207	177.144	176.317	177.591	186.199	183.446	182.708
907	ENSG00000074695	protein_coding	lectin, mannose binding 1 [Source:HGNC Symbol;Acc:HGNC:6631]	LMAN1	157.385	157.913	158.234	157.143	156.587	145.802	156.983	155.101	157.299	155.733	155.286	152.907	147.842	148.211	147.885	141.13	145.729	141.614
908	ENSG00000074696	protein_coding	3-hydroxyacyl-CoA dehydratase 3 [Source:HGNC Symbol;Acc:HGNC:24175]	HACD3	202.582	199.822	200.744	203.287	207.598	199.943	202.69	211.005	213.616	203.008	207.182	203.824	187.779	179.748	177.548	185.327	176.267	182.782
909	ENSG00000074755	protein_coding	zinc finger ZZ-type and EF-hand domain containing 1 [Source:HGNC Symbol;Acc:HGNC:29027]	ZZEF1	93.8543	93.656	95.1427	94.7711	92.3191	95.4404	93.4058	98.5903	93.5251	96.7309	90.5835	91.2605	88.5721	89.4384	88.7308	88.3949	85.8826	87.5421
910	ENSG00000074800	protein_coding	enolase 1 [Source:HGNC Symbol;Acc:HGNC:3350]	ENO1	908.027	891.239	854.766	926.227	875.974	936.126	874.53	903.632	912.258	855.169	876.132	896.51	853.926	824.664	794.837	816.346	844.725	833.918
911	ENSG00000074842	protein_coding	myeloid derived growth factor [Source:HGNC Symbol;Acc:HGNC:16948]	MYDGF	30.5155	29.797	27.2158	33.5539	30.1646	31.1579	30.2138	32.6386	32.625	31.4103	31.4461	30.35	21.8245	23.4762	20.6351	21.0243	21.8317	21.3835
912	ENSG00000074855	protein_coding	anoctamin 8 [Source:HGNC Symbol;Acc:HGNC:29329]	ANO8	33.3362	36.2796	38.0683	41.0617	36.5049	39.2559	34.3924	37.8312	36.8974	35.865	37.0782	41.5012	37.5559	36.6033	34.3488	35.0211	40.3079	36.7424
913	ENSG00000074935	protein_coding	tubulin epsilon 1 [Source:HGNC Symbol;Acc:HGNC:20775]	TUBE1	30.5796	29.3421	30.4772	28.4718	29.4921	26.1834	32.5281	31.6271	32.0813	29.8648	31.5802	28.9298	24.0956	27.5069	25.9658	25.7867	26.6313	25.6602
914	ENSG00000074964	protein_coding	Rho guanine nucleotide exchange factor 10 like [Source:HGNC Symbol;Acc:HGNC:25540]	ARHGEF10L	23.5277	24.9067	20.4118	22.8698	21.2785	23.9854	21.0854	21.9164	21.5947	23.9555	21.5898	23.4069	24.8711	25.8184	25.063	25.7867	26.7587	24.6561
915	ENSG00000075043	protein_coding	potassium voltage-gated channel subfamily Q member 2 [Source:HGNC Symbol;Acc:HGNC:6296]	KCNQ2	157.578	157.06	146.763	170.484	145.299	164.543	141.877	151.729	155.435	151.597	150.257	157.01	144.13	146.141	144.918	135.554	142.416	142.172
916	ENSG00000075089	protein_coding	actin related protein 6 [Source:HGNC Symbol;Acc:HGNC:24025]	ACTR6	41.9908	39.4072	40.7112	42.159	44.5745	40.4899	43.6494	41.4727	42.4902	41.2288	45.7946	39.6076	46.3632	44.3379	47.6756	43.3263	45.7871	47.0436
917	ENSG00000075131	protein_coding	TIMELESS interacting protein [Source:HGNC Symbol;Acc:HGNC:30750]	TIPIN	28.464	28.4892	25.4164	24.6601	27.3787	26.8004	26.1639	27.7159	26.8768	26.2737	26.6185	27.0363	22.4338	19.6089	19.9042	23.3474	20.8973	23.1313
918	ENSG00000075142	protein_coding	sorcin [Source:HGNC Symbol;Acc:HGNC:11292]	SRI	89.3026	88.0264	87.3829	85.9928	86.363	91.1215	90.063	87.1263	92.9037	86.0032	89.6448	91.6287	94.2221	91.7806	90.7943	91.1827	93.2306	89.3643
919	ENSG00000075151	protein_coding	eukaryotic translation initiation factor 4 gamma 3 [Source:HGNC Symbol;Acc:HGNC:3298]	EIF4G3	193.799	198.457	205.13	188.329	188.577	185.906	192.083	182.682	176.331	195.144	190.353	197.565	197.473	199.466	199.386	210.185	196.443	195.464
920	ENSG00000075188	protein_coding	nucleoporin 37 [Source:HGNC Symbol;Acc:HGNC:29929]	NUP37	23.0789	21.6085	20.9179	24.8911	21.8549	21.7103	24.2996	23.1303	24.1581	24.6828	25.4117	23.6699	21.9353	19.3366	20.6351	18.9335	20.0902	21.5694
921	ENSG00000075213	protein_coding	semaphorin 3A [Source:HGNC Symbol;Acc:HGNC:10723]	SEMA3A	1.47449	1.08043	1.57447	1.67481	1.20082	1.46535	1.73569	0.944093	0.854465	1.59097	1.87738	1.20979	2.04951	2.8324	3.09526	3.13622	2.71834	2.60321
922	ENSG00000075218	protein_coding	G2 and S-phase expressed 1 [Source:HGNC Symbol;Acc:HGNC:13698]	GTSE1	111.676	115.378	112.631	114.927	108.17	114.876	105.298	111.336	113.799	112.732	106.34	113.458	124.577	121.194	115.041	113.949	112.344	114.987
923	ENSG00000075223	protein_coding	semaphorin 3C [Source:HGNC Symbol;Acc:HGNC:10725]	SEMA3C	98.9188	97.8639	100.035	100.084	104.76	95.9417	103.113	94.0047	93.6804	100.186	107.547	103.569	147.011	144.67	152.742	141.711	152.397	147.044
924	ENSG00000075234	protein_coding	tetratricopeptide repeat domain 38 [Source:HGNC Symbol;Acc:HGNC:26082]	TTC38	24.8098	22.0066	22.7173	25.5264	22.8636	23.3684	24.0425	23.0628	24.7018	24.0918	21.9921	24.0381	22.7108	23.2583	20.85	20.5016	21.1521	20.3422
925	ENSG00000075239	protein_coding	acetyl-CoA acetyltransferase 1 [Source:HGNC Symbol;Acc:HGNC:93]	ACAT1	46.9271	47.5388	47.6838	48.1075	51.9235	45.8885	48.7921	43.8329	50.8795	54.6384	50.5551	46.4456	52.2348	49.3491	48.7933	50.8184	49.8646	49.9815
926	ENSG00000075240	protein_coding	GRAM domain containing 4 [Source:HGNC Symbol;Acc:HGNC:29113]	GRAMD4	44.491	41.6249	44.2537	43.8338	40.2035	44.4617	40.4351	41.7424	43.3447	40.2288	42.9785	42.185	46.1417	43.0851	47.1597	45.7075	48.6328	46.7461
927	ENSG00000075292	protein_coding	zinc finger protein 638 [Source:HGNC Symbol;Acc:HGNC:17894]	ZNF638	227.648	231.439	235.214	219.4	234.208	204.532	228.211	205.475	193.264	224.918	221.262	220.919	203.843	218.04	226.255	203.157	221.248	215.025
928	ENSG00000075303	protein_coding	solute carrier family 25 member 40 [Source:HGNC Symbol;Acc:HGNC:29680]	SLC25A40	73.2756	70.6827	73.3251	69.9377	77.2848	71.9563	78.8774	67.5026	76.3581	76.9575	76.235	72.9558	71.3451	73.9147	71.7928	69.6357	71.229	72.8526
929	ENSG00000075336	protein_coding	translocase of inner mitochondrial membrane 21 [Source:HGNC Symbol;Acc:HGNC:25010]	TIMM21	30.1949	31.7304	30.3647	26.1039	30.789	26.8776	31.9495	28.3902	30.3723	28.2738	29.7028	28.246	24.6495	24.4567	24.4612	25.9609	23.8704	23.9867
930	ENSG00000075340	protein_coding	adducin 2 [Source:HGNC Symbol;Acc:HGNC:244]	ADD2	171.681	179.806	174.316	176.779	175.896	180.623	174.726	176.276	180.525	172.597	176.138	176.419	204.065	210.578	203.642	195.433	208.718	195.91
931	ENSG00000075391	protein_coding	RAS protein activator like 2 [Source:HGNC Symbol;Acc:HGNC:9874]	RASAL2	84.3663	82.7948	81.5911	82.7587	81.5117	81.0183	87.4273	81.664	81.2519	82.1395	75.9668	83.0024	84.1961	79.2527	79.445	79.6832	77.3878	84.0092
932	ENSG00000075399	protein_coding	VPS9 domain containing 1 [Source:HGNC Symbol;Acc:HGNC:13526]	VPS9D1	6.28259	6.71002	6.86017	6.46823	6.2923	6.63263	5.52849	6.74352	5.74822	6.27296	5.36394	6.31197	8.75196	8.06144	7.91011	6.67899	7.73028	7.80962
933	ENSG00000075407	protein_coding	zinc finger protein 37A [Source:HGNC Symbol;Acc:HGNC:13102]	ZNF37A	86.8665	89.3911	93.2871	79.4668	86.0748	76.5837	89.6773	81.0571	74.6492	87.5033	81.6659	86.2635	82.3128	90.201	97.4577	80.9609	84.0137	87.0958
934	ENSG00000075413	protein_coding	microtubule affinity regulating kinase 3 [Source:HGNC Symbol;Acc:HGNC:6897]	MARK3	133.217	140.569	141.702	131.039	132.667	132.575	130.948	136.961	130.811	138.96	133.428	133.761	142.302	139.332	144.875	145.892	143.18	139.309
935	ENSG00000075415	protein_coding	solute carrier family 25 member 3 [Source:HGNC Symbol;Acc:HGNC:10989]	SLC25A3	258.356	261.065	245.561	268.605	269.224	276.681	268.132	261.379	275.681	269.147	272.421	274.991	290.2	274.361	271.48	252.64	292.264	288.212
936	ENSG00000075420	protein_coding	fibronectin type III domain containing 3B [Source:HGNC Symbol;Acc:HGNC:24670]	FNDC3B	42.7601	46.0034	41.4984	40.4842	38.1861	42.5336	42.8779	43.7655	40.2375	39.7288	40.9671	39.9232	33.9554	36.9846	33.9619	38.2154	31.9405	33.3954
937	ENSG00000075426	protein_coding	FOS like 2, AP-1 transcription factor subunit [Source:HGNC Symbol;Acc:HGNC:3798]	FOSL2	13.8473	11.6572	12.7082	10.8574	9.75066	11.9156	11.1213	14.2288	12.7393	11.8641	11.0631	13.4129	10.1368	10.2402	11.1773	9.11827	10.9583	11.4913
938	ENSG00000075461	protein_coding	calcium voltage-gated channel auxiliary subunit gamma 4 [Source:HGNC Symbol;Acc:HGNC:1408]	CACNG4	555.176	563.642	538.411	550.55	514.047	552.667	531.378	554.452	557.189	519.792	535.79	538.095	600.008	602.538	609.164	596.579	648.07	590.704
939	ENSG00000075539	protein_coding	FRY like transcription coactivator [Source:HGNC Symbol;Acc:HGNC:29127]	FRYL	121.741	116.117	109.594	115.158	121.619	113.834	117.127	111.133	107.352	117.368	119.951	122.768	130.116	133.232	129.571	124.636	129.588	134.734
940	ENSG00000075568	protein_coding	transmembrane protein 131 [Source:HGNC Symbol;Acc:HGNC:30366]	TMEM131	89.1103	93.3716	97.1671	90.5552	93.4719	90.6202	92.6344	93.0606	85.0581	95.64	90.9187	86.9473	95.3299	93.0334	96.5119	95.4805	92.8908	95.5376
941	ENSG00000075618	protein_coding	fascin actin-bundling protein 1 [Source:HGNC Symbol;Acc:HGNC:11148]	FSCN1	686.277	659.288	618.034	718.436	638.981	702.711	600.613	685.479	729.791	621.342	640.119	685.795	618.01	622.31	576.535	597.856	637.154	624.583
942	ENSG00000075624	protein_coding	actin beta [Source:HGNC Symbol;Acc:HGNC:132]	ACTB	4115.74	3990.3	3531.19	3974.84	3578.01	3711.92	3652.34	4026.08	3954	3752.91	3668.13	3639.37	2155.86	2166.89	1983.29	2081.46	2034.08	2092.2
943	ENSG00000075702	protein_coding	WD repeat domain 62 [Source:HGNC Symbol;Acc:HGNC:24502]	WDR62	55.9664	49.4722	59.7735	62.5455	55.2858	53.3309	51.1707	53.0715	52.1224	55.4112	48.5436	53.7043	45.2	47.8784	46.5149	50.4118	46.4242	47.9734
944	ENSG00000075711	protein_coding	discs large MAGUK scaffold protein 1 [Source:HGNC Symbol;Acc:HGNC:2900]	DLG1	122.382	116.174	121.403	115.504	124.021	117.729	123.491	117.472	111.236	121.732	118.61	122.768	115.77	122.229	126.003	127.075	121.816	119.19
945	ENSG00000075785	protein_coding	RAB7A, member RAS oncogene family [Source:HGNC Symbol;Acc:HGNC:9788]	RAB7A	172.643	171.56	163.013	170.773	164.08	164.543	172.605	166.7	161.339	167.688	168.629	163.533	168.06	156.871	154.376	161.573	163.228	162.217
946	ENSG00000075826	protein_coding	SEC31 homolog B, COPII coat complex component [Source:HGNC Symbol;Acc:HGNC:23197]	SEC31B	4.35935	7.16494	8.65956	7.39226	6.19623	6.47838	6.10705	6.67609	6.29197	6.40933	5.09574	7.20616	6.31471	6.42736	7.17928	6.50475	5.69153	8.40463
947	ENSG00000075856	protein_coding	spliceosome associated factor 3, U4/U6 recycling protein [Source:HGNC Symbol;Acc:HGNC:16860]	SART3	132.768	123.51	128.825	129.596	127.335	133.809	132.941	130.689	132.597	129.823	131.752	127.817	130.781	125.66	128.797	126.61	124.789	128.673
948	ENSG00000075914	protein_coding	exosome component 7 [Source:HGNC Symbol;Acc:HGNC:28112]	EXOSC7	20.8351	20.2438	20.5243	21.3105	21.6148	20.2835	21.5997	19.9608	21.517	22.6372	21.9251	24.1433	18.9995	19.8813	18.8295	19.7466	20.8548	19.4869
949	ENSG00000075945	protein_coding	kinesin associated protein 3 [Source:HGNC Symbol;Acc:HGNC:17060]	KIFAP3	78.7247	80.6908	80.354	81.9502	87.6599	87.4196	86.3987	87.3286	85.1358	84.3668	91.321	87.6311	86.024	88.1856	84.7757	78.1151	84.9482	82.3728
950	ENSG00000075975	protein_coding	makorin ring finger protein 2 [Source:HGNC Symbol;Acc:HGNC:7113]	MKRN2	43.7858	43.5014	42.4544	43.083	44.2382	44.0376	46.7993	43.6306	43.8884	43.7744	45.9958	41.5012	46.8064	46.2443	45.2682	44.2555	45.2349	41.7257
951	ENSG00000076003	protein_coding	minichromosome maintenance complex component 6 [Source:HGNC Symbol;Acc:HGNC:6949]	MCM6	310.924	307.239	296.787	302.274	318.025	314.548	317.31	309.797	307.918	308.057	311.98	303.185	235.915	232.474	225.567	228.421	233.438	234.995
952	ENSG00000076043	protein_coding	RNA exonuclease 2 [Source:HGNC Symbol;Acc:HGNC:17851]	REXO2	10.7702	9.04147	10.4027	10.9151	10.6153	10.8744	10.8641	10.0478	11.4188	11.1368	8.8505	8.46855	7.7549	10.567	9.1998	8.36325	9.76904	10.7103
953	ENSG00000076053	protein_coding	RNA binding motif protein 7 [Source:HGNC Symbol;Acc:HGNC:9904]	RBM7	15.1295	16.6045	14.845	16.4016	15.8028	13.9594	13.9498	14.7009	14.992	15.3188	16.9635	15.1487	16.4515	16.3408	16.594	16.9007	17.5418	16.4002
954	ENSG00000076067	protein_coding	RNA binding motif single stranded interacting protein 2 [Source:HGNC Symbol;Acc:HGNC:9909]	RBMS2	31.4771	28.546	31.9392	29.9733	28.7717	29.6154	30.5353	30.3458	27.0322	32.0012	26.8197	34.1372	37.3343	39.7625	39.8515	44.5459	38.4391	37.8209
955	ENSG00000076108	protein_coding	bromodomain adjacent to zinc finger domain 2A [Source:HGNC Symbol;Acc:HGNC:962]	BAZ2A	172.451	166.443	181.57	171.87	164.32	173.22	164.89	177.692	170.427	175.37	172.048	165.9	206.114	200.12	212.283	204.551	193.682	183.6
956	ENSG00000076201	protein_coding	protein tyrosine phosphatase non-receptor type 23 [Source:HGNC Symbol;Acc:HGNC:14406]	PTPN23	87.9563	76.9378	86.0896	89.2847	84.3456	82.5608	82.6702	84.9684	87.2331	84.6396	83.7445	85.1589	81.8142	79.5795	80.5627	81.4256	81.1255	77.3152
957	ENSG00000076242	protein_coding	mutL homolog 1 [Source:HGNC Symbol;Acc:HGNC:7127]	MLH1	65.839	71.9337	70.9072	74.2691	73.1059	71.3779	73.7989	69.256	68.4349	72.0936	72.145	68.9582	69.628	72.6074	70.7611	72.2492	73.1404	71.2906
958	ENSG00000076248	protein_coding	uracil DNA glycosylase [Source:HGNC Symbol;Acc:HGNC:12572]	UNG	101.547	98.7738	97.2795	105.398	98.4192	100.492	97.97	98.6577	102.924	99.7765	106.474	100.886	78.8785	77.8365	74.0283	76.6631	79.1292	83.4141
959	ENSG00000076321	protein_coding	kelch like family member 20 [Source:HGNC Symbol;Acc:HGNC:25056]	KLHL20	34.0414	36.0521	35.0881	34.016	34.7277	34.2814	34.0709	33.313	31.8482	32.5012	33.4576	32.1384	33.1245	34.2067	32.5862	36.415	32.705	33.6185
960	ENSG00000076344	protein_coding	regulator of G protein signaling 11 [Source:HGNC Symbol;Acc:HGNC:9993]	RGS11	4.10292	3.63933	5.84802	6.58373	6.0041	5.78427	4.69279	4.85534	5.12679	5.72749	4.09	6.10157	5.59461	6.26396	6.96434	5.51742	6.8808	7.02865
961	ENSG00000076351	protein_coding	solute carrier family 46 member 1 [Source:HGNC Symbol;Acc:HGNC:30521]	SLC46A1	19.7453	22.3478	20.693	23.4473	20.9903	21.0162	21.5354	21.5118	20.0411	20.4553	20.0477	20.8821	21.4368	20.3715	21.9677	18.585	20.2601	19.8587
962	ENSG00000076356	protein_coding	plexin A2 [Source:HGNC Symbol;Acc:HGNC:9100]	PLXNA2	356.697	337.776	316.693	348.129	315.72	321.721	322.774	347.359	335.882	323.649	292.066	324.751	217.193	219.783	193.497	216.69	181.959	211.269
963	ENSG00000076382	protein_coding	sperm associated antigen 5 [Source:HGNC Symbol;Acc:HGNC:13452]	SPAG5	130.845	137.612	134.729	133.812	133.339	139.092	141.619	131.634	131.821	136.187	134.903	135.76	149.78	149.845	149.647	154.662	148.192	149.015
964	ENSG00000076513	protein_coding	ankyrin repeat domain 13A [Source:HGNC Symbol;Acc:HGNC:21268]	ANKRD13A	32.5028	33.9482	32.5015	31.4171	35.4482	34.32	33.8781	32.9758	32.8581	32.9103	32.3848	34.7158	38.0544	41.7779	35.6815	37.7508	36.6551	39.0109
965	ENSG00000076554	protein_coding	tumor protein D52 [Source:HGNC Symbol;Acc:HGNC:12005]	TPD52	57.6332	59.4803	56.7932	59.3114	61.8182	59.308	63.3205	61.973	68.5126	61.8205	64.3002	61.9099	69.351	65.6898	68.9125	64.2925	61.9697	64.5595
966	ENSG00000076555	protein_coding	acetyl-CoA carboxylase beta [Source:HGNC Symbol;Acc:HGNC:85]	ACACB	31.0924	31.7304	30.8146	28.7605	31.8458	32.9703	29.121	29.3343	31.9259	36.4105	31.312	34.1898	41.3226	43.6298	42.1299	42.5713	40.138	39.6059
967	ENSG00000076604	protein_coding	TNF receptor associated factor 4 [Source:HGNC Symbol;Acc:HGNC:12034]	TRAF4	42.0549	41.2268	41.4984	46.3171	40.5397	43.7676	39.9851	43.226	42.1795	40.3197	42.8444	45.2884	41.8211	41.8868	44.4084	44.1975	46.3392	45.5561
968	ENSG00000076641	protein_coding	phosphoprotein membrane anchor with glycosphingolipid microdomains 1 [Source:HGNC Symbol;Acc:HGNC:30043]	PAG1	21.7968	22.5752	22.155	22.4078	21.7108	20.1292	21.2783	22.4559	22.9152	23.6827	20.8523	22.4075	19.7196	20.2625	20.3341	17.4815	18.8585	17.6646
969	ENSG00000076650	protein_coding	G-patch domain containing 1 [Source:HGNC Symbol;Acc:HGNC:24658]	GPATCH1	18.2067	18.3104	17.1504	15.9973	18.2525	17.7384	20.3783	18.2749	17.7884	16.3643	16.1589	16.8845	17.7255	16.1229	18.1417	17.83	16.8622	14.9126
970	ENSG00000076662	protein_coding	intercellular adhesion molecule 3 [Source:HGNC Symbol;Acc:HGNC:5346]	ICAM3	2.05146	2.61577	2.02431	2.8876	2.30558	2.50652	1.6714	2.62997	2.175	2.68192	2.27967	2.15659	1.16324	1.68854	1.84856	1.8585	1.44412	1.74787
971	ENSG00000076685	protein_coding	5'-nucleotidase, cytosolic II [Source:HGNC Symbol;Acc:HGNC:8022]	NT5C2	105.907	103.039	108.245	99.1025	106.969	98.294	113.013	110.594	103.856	104.64	102.921	103.884	109.787	105.834	100.725	103.96	105.548	102.492
972	ENSG00000076706	protein_coding	melanoma cell adhesion molecule [Source:HGNC Symbol;Acc:HGNC:6934]	MCAM	19.6812	16.8319	20.6368	18.5384	18.0123	19.7051	19.0283	20.9724	21.75	18.5007	18.0362	18.4625	20.6613	20.7528	22.3976	21.547	24.2527	21.9041
973	ENSG00000076770	protein_coding	muscleblind like splicing regulator 3 [Source:HGNC Symbol;Acc:HGNC:20564]	MBNL3	61.6079	61.3	58.3115	61.8525	65.853	57.9198	59.3348	59.0732	58.259	62.0023	62.624	58.6487	46.474	51.8547	51.0718	48.0306	50.5866	49.4981
974	ENSG00000076826	protein_coding	calmodulin regulated spectrin associated protein family member 3 [Source:HGNC Symbol;Acc:HGNC:29307]	CAMSAP3	20.1299	22.1772	23.1671	25.6419	21.6628	24.371	19.1569	23.0628	23.925	20.9553	21.9921	22.1445	25.148	23.9664	26.4387	24.3347	24.0403	23.0941
975	ENSG00000076864	protein_coding	RAP1 GTPase activating protein [Source:HGNC Symbol;Acc:HGNC:9858]	RAP1GAP	29.8103	30.0245	29.0714	31.6481	29.9725	28.9985	24.7496	31.3574	31.8482	26.6828	27.1549	29.1402	23.7078	24.1843	27.0405	27.1806	26.971	24.2098
976	ENSG00000076924	protein_coding	XPA binding protein 2 [Source:HGNC Symbol;Acc:HGNC:14089]	XAB2	58.4025	55.443	55.9498	60.8129	54.0849	59.7708	56.3135	59.1407	58.259	53.3202	56.7236	58.0701	56.6108	55.4496	54.6399	56.0454	55.8959	55.5226
977	ENSG00000076928	protein_coding	Rho guanine nucleotide exchange factor 1 [Source:HGNC Symbol;Acc:HGNC:681]	ARHGEF1	68.8521	65.5649	71.1321	73.5761	65.5648	69.4498	65.699	70.5372	69.9108	65.2297	66.4458	69.2738	62.0946	62.1493	65.9892	61.7371	62.6068	65.9727
978	ENSG00000076984	protein_coding	mitogen-activated protein kinase kinase 7 [Source:HGNC Symbol;Acc:HGNC:6847]	MAP2K7	48.658	47.9937	51.5075	52.4389	49.81	49.012	47.0565	50.2392	50.8018	50.4565	47.0015	50.3905	47.4711	50.9287	50.4699	53.49	50.5866	49.8328
979	ENSG00000077044	protein_coding	diacylglycerol kinase delta [Source:HGNC Symbol;Acc:HGNC:2851]	DGKD	71.6087	71.0239	76.1367	69.4757	70.0799	68.8713	72.0632	72.358	69.6777	71.73	68.5243	71.7986	74.5025	72.2261	73.2545	70.0422	71.9936	76.2739
980	ENSG00000077080	protein_coding	actin like 6B [Source:HGNC Symbol;Acc:HGNC:160]	ACTL6B	36.157	35.3698	37.7872	42.0435	38.2822	39.0245	34.0066	37.1568	37.9072	37.9105	34.8656	39.7654	39.1069	41.2876	40.3674	36.5892	38.0993	40.9075
981	ENSG00000077092	protein_coding	retinoic acid receptor beta [Source:HGNC Symbol;Acc:HGNC:9865]	RARB	1.92324	3.29815	2.47416	1.73256	2.59377	2.08234	2.05711	2.09049	2.79643	1.81825	1.87738	3.15598	3.93284	4.52094	4.90083	4.35586	3.78019	3.38417
982	ENSG00000077097	protein_coding	DNA topoisomerase II beta [Source:HGNC Symbol;Acc:HGNC:11990]	TOP2B	559.984	551.928	563.04	532.647	558.814	524.556	544.749	501.178	509.883	533.157	557.715	532.52	616.626	630.917	650.563	580.375	652.827	634.661
983	ENSG00000077147	protein_coding	transmembrane 9 superfamily member 3 [Source:HGNC Symbol;Acc:HGNC:21529]	TM9SF3	373.43	354.721	360.384	341.834	358.421	347.982	358.066	357.204	352.506	356.559	363.876	345.896	348.195	348.058	352.344	343.823	349.944	350.726
984	ENSG00000077150	protein_coding	nuclear factor kappa B subunit 2 [Source:HGNC Symbol;Acc:HGNC:7795]	NFKB2	6.73135	7.84731	5.96048	7.04575	7.01279	6.70975	6.49276	7.88992	6.9134	7.22755	7.24131	6.04897	7.64412	6.42736	6.53444	6.21436	6.07379	6.58239
985	ENSG00000077152	protein_coding	ubiquitin conjugating enzyme E2 T [Source:HGNC Symbol;Acc:HGNC:25009]	UBE2T	95.0723	100.139	94.0744	103.896	104.327	104.58	106.97	101.557	101.681	96.4127	99.9704	99.3083	94.6652	95.1577	94.2765	97.5132	98.3275	96.4673
986	ENSG00000077157	protein_coding	protein phosphatase 1 regulatory subunit 12B [Source:HGNC Symbol;Acc:HGNC:7619]	PPP1R12B	72.7627	72.2749	74.6185	69.0137	73.3461	71.0694	72.1918	67.9073	76.1251	74.5028	67.8538	72.6402	69.9603	71.2457	69.2994	74.9208	65.2827	65.1917
987	ENSG00000077232	protein_coding	DnaJ heat shock protein family (Hsp40) member C10 [Source:HGNC Symbol;Acc:HGNC:24637]	DNAJC10	195.017	194.022	186.574	186.77	196.742	180.045	191.504	185.986	185.031	196.144	198.935	193.199	162.188	166.567	162.329	158.844	172.317	168.985
988	ENSG00000077235	protein_coding	general transcription factor IIIC subunit 1 [Source:HGNC Symbol;Acc:HGNC:4664]	GTF3C1	185.657	189.018	192.647	177.992	176.617	188.336	178.197	192.662	193.653	183.78	183.514	182.258	178.141	181.11	175.441	183.12	173.719	168.836
989	ENSG00000077254	protein_coding	ubiquitin specific peptidase 33 [Source:HGNC Symbol;Acc:HGNC:20059]	USP33	124.049	129.651	129.556	122.261	134.636	125.056	134.869	128.666	125.995	125.232	131.551	124.398	135.545	139.441	139.416	131.199	134.983	132.094
990	ENSG00000077264	protein_coding	p21 (RAC1) activated kinase 3 [Source:HGNC Symbol;Acc:HGNC:8592]	PAK3	49.0427	45.3211	48.5835	47.6454	49.4738	46.0428	48.9207	42.0121	43.1116	44.638	47.5379	48.1813	55.3922	52.7262	58.0791	46.114	51.8184	54.2582
991	ENSG00000077279	protein_coding	doublecortin [Source:HGNC Symbol;Acc:HGNC:2714]	DCX	100.522	104.915	105.039	99.449	100.004	104.849	106.198	100.883	92.1269	99.0037	107.413	100.413	153.935	147.775	160.782	141.072	162.931	153.998
992	ENSG00000077312	protein_coding	small nuclear ribonucleoprotein polypeptide A [Source:HGNC Symbol;Acc:HGNC:11151]	SNRPA	82.1225	84.0458	81.085	89.6889	89.6292	87.4967	80.2274	82.8779	80.0867	82.8668	85.0854	83.4758	91.6187	90.8001	90.4934	93.3316	92.8908	87.2074
993	ENSG00000077327	protein_coding	sperm associated antigen 6 [Source:HGNC Symbol;Acc:HGNC:11215]	SPAG6	5.89795	6.2551	5.84802	5.19769	5.61984	5.93851	5.46421	6.00173	5.98126	5.36384	5.63213	5.36517	6.97941	6.5363	7.0933	7.02746	8.23997	7.25179
994	ENSG00000077348	protein_coding	exosome component 5 [Source:HGNC Symbol;Acc:HGNC:24662]	EXOSC5	20.6428	21.3242	19.5121	22.8121	20.8462	20.8234	19.4783	18.2749	22.3714	20.5008	22.0592	21.9341	20.8275	18.6829	17.2819	18.8173	18.6461	18.9662
995	ENSG00000077380	protein_coding	dynein cytoplasmic 1 intermediate chain 2 [Source:HGNC Symbol;Acc:HGNC:2964]	DYNC1I2	125.139	118.961	122.583	111.692	123.06	120.66	121.434	115.247	117.45	120.686	123.572	118.244	126.571	128.929	130.259	129.863	129.206	125.065
996	ENSG00000077454	protein_coding	leucine rich repeats and calponin homology domain containing 4 [Source:HGNC Symbol;Acc:HGNC:6691]	LRCH4	8.97513	8.41596	8.88449	9.81785	9.55853	9.75613	8.61416	11.2617	8.70001	8.54578	8.8505	9.62575	8.80736	8.93295	9.37176	10.396	7.90018	8.70214
997	ENSG00000077458	protein_coding	family with sequence similarity 76 member B [Source:HGNC Symbol;Acc:HGNC:28492]	FAM76B	61.2232	58.9117	61.4042	54.2869	60.6654	57.4571	62.2277	60.1522	60.667	61.275	66.8481	61.3839	60.1559	64.0013	66.892	65.2218	63.966	64.2992
998	ENSG00000077463	protein_coding	sirtuin 6 [Source:HGNC Symbol;Acc:HGNC:14934]	SIRT6	15.0013	16.1495	16.6444	17.4411	15.8508	16.1188	15.7498	15.645	16.7786	14.8187	16.0248	16.3059	15.0113	14.2709	14.4016	15.2165	13.5068	13.4995
999	ENSG00000077514	protein_coding	DNA polymerase delta 3, accessory subunit [Source:HGNC Symbol;Acc:HGNC:20932]	POLD3	56.2869	57.2058	57.8054	57.6366	54.4692	57.4956	57.342	54.4877	55.9286	57.3658	55.7179	53.4939	48.4681	51.4189	46.3859	53.7223	49.7372	50.7997
1000	ENSG00000077549	protein_coding	capping actin protein of muscle Z-line subunit beta [Source:HGNC Symbol;Acc:HGNC:1491]	CAPZB	100.265	96.4992	92.1063	104.762	97.0263	102.034	94.3058	103.108	92.3599	100.867	96.6179	98.9927	87.1319	90.4189	88.8168	91.7054	93.1032	90.9262
1001	ENSG00000077585	protein_coding	G protein-coupled receptor 137B [Source:HGNC Symbol;Acc:HGNC:11862]	GPR137B	10.3214	11.3729	12.1459	12.4744	11.1916	10.8744	11.057	11.6663	11.7295	11.8186	12.0689	11.8875	11.5216	12.5279	14.0146	12.1964	13.2519	13.1648
1002	ENSG00000077616	protein_coding	N-acetylated alpha-linked acidic dipeptidase 2 [Source:HGNC Symbol;Acc:HGNC:14526]	NAALAD2	24.1046	25.6459	26.8222	26.3349	26.0818	24.371	24.8782	23.6698	26.9545	26.0919	27.6243	25.2479	31.2412	32.4092	30.9526	28.8648	32.4502	32.1682
1003	ENSG00000077684	protein_coding	jade family PHD finger 1 [Source:HGNC Symbol;Acc:HGNC:30027]	JADE1	104.368	107.702	103.409	101.008	101.83	101.842	102.02	95.8254	99.4287	99.0947	100.976	98.4141	111.227	114.494	111.687	110.697	114.213	115.285
1004	ENSG00000077721	protein_coding	ubiquitin conjugating enzyme E2 A [Source:HGNC Symbol;Acc:HGNC:12472]	UBE2A	53.7867	52.5997	55.275	51.3993	50.6746	52.6754	53.6778	60.4894	53.9867	51.0474	52.6336	52.5471	47.2495	48.6955	47.5896	45.2429	44.3854	49.4609
1005	ENSG00000077782	protein_coding	fibroblast growth factor receptor 1 [Source:HGNC Symbol;Acc:HGNC:3688]	FGFR1	83.7252	82.4536	83.1093	86.5126	78.9659	81.0569	86.5273	91.3747	92.9813	84.185	77.71	84.6329	73.5608	72.3896	72.1797	74.7466	73.0979	72.5922
1006	ENSG00000077942	protein_coding	fibulin 1 [Source:HGNC Symbol;Acc:HGNC:3600]	FBLN1	136.935	142.673	132.536	145.42	131.322	145.455	130.241	142.558	151.473	136.823	144.96	143.545	148.673	151.642	144.832	151.816	144.2	138.528
1007	ENSG00000078018	protein_coding	microtubule associated protein 2 [Source:HGNC Symbol;Acc:HGNC:6839]	MAP2	363.878	379.571	378.434	372.905	393.004	382.417	385.194	345.673	336.349	376.832	377.688	378.192	458.204	475.625	485.569	429.256	474.181	463.11
1008	ENSG00000078043	protein_coding	protein inhibitor of activated STAT 2 [Source:HGNC Symbol;Acc:HGNC:17311]	PIAS2	57.9537	62.9491	59.7735	58.7916	59.8009	57.0714	60.4277	60.6917	59.8126	63.5024	57.8635	56.6499	59.5466	62.803	61.5613	64.9314	60.9078	61.1009
1009	ENSG00000078061	protein_coding	A-Raf proto-oncogene, serine/threonine kinase [Source:HGNC Symbol;Acc:HGNC:646]	ARAF	24.8739	26.2146	30.0273	29.1648	25.4574	29.5383	24.2996	29.6715	28.1973	24.91	28.563	27.1415	27.1976	26.6899	26.1807	26.2513	26.0366	28.6724
1010	ENSG00000078070	protein_coding	methylcrotonoyl-CoA carboxylase 1 [Source:HGNC Symbol;Acc:HGNC:6936]	MCCC1	20.2582	23.8831	25.7538	25.1799	24.4487	25.3351	23.3354	24.2092	23.0706	23.41	25.881	22.3549	31.2966	28.6508	29.19	29.9683	27.9055	30.1228
1011	ENSG00000078114	protein_coding	nebulette [Source:HGNC Symbol;Acc:HGNC:16932]	NEBL	58.7871	63.8021	62.5288	57.5788	65.4687	61.3132	58.692	55.162	56.3947	57.9567	65.1048	61.3313	61.4853	60.6787	66.0752	56.9166	67.6187	59.2043
1012	ENSG00000078124	protein_coding	alkaline ceramidase 3 [Source:HGNC Symbol;Acc:HGNC:16066]	ACER3	63.9799	63.0628	55.8373	64.3358	63.6435	62.9714	64.2848	60.0848	63.0751	62.1387	61.35	57.0181	58.6049	58.2276	52.8344	53.8384	54.027	55.8202
1013	ENSG00000078140	protein_coding	ubiquitin conjugating enzyme E2 K [Source:HGNC Symbol;Acc:HGNC:4914]	UBE2K	182.58	178.612	182.975	170.773	177.866	174.492	183.469	178.164	175.321	182.371	181.569	174.473	172.325	166.894	169.036	167.614	163.483	171.402
1014	ENSG00000078142	protein_coding	phosphatidylinositol 3-kinase catalytic subunit type 3 [Source:HGNC Symbol;Acc:HGNC:8974]	PIK3C3	105.201	102.925	101.666	101.297	102.838	99.258	104.27	99.939	99.6617	99.5038	106.943	99.4135	111.227	112.261	115.857	105.354	113.066	110.116
1015	ENSG00000078177	protein_coding	NEDD4 binding protein 2 [Source:HGNC Symbol;Acc:HGNC:29851]	N4BP2	132.319	131.812	117.017	128.556	138.623	120.775	133.134	123.878	121.101	128.55	128.399	134.392	128.787	141.13	147.326	132.883	136.045	137.263
1016	ENSG00000078237	protein_coding	TP53 induced glycolysis regulatory phosphatase [Source:HGNC Symbol;Acc:HGNC:1185]	TIGAR	5.38508	4.37857	5.00455	3.86939	4.32295	4.12611	5.27135	4.45072	5.51518	5.54566	4.69344	4.89177	2.43726	2.39664	2.66536	3.25238	2.1237	2.75196
1017	ENSG00000078246	protein_coding	TUB like protein 3 [Source:HGNC Symbol;Acc:HGNC:12425]	TULP3	32.9516	32.8109	32.389	31.7059	33.9112	33.2788	35.6138	33.4479	33.4018	33.0467	34.3962	34.032	38.9961	37.5837	36.4123	37.8089	34.9986	32.9491
1018	ENSG00000078269	protein_coding	synaptojanin 2 [Source:HGNC Symbol;Acc:HGNC:11504]	SYNJ2	10.3855	12.5102	11.2462	12.1279	11.5279	11.6457	12.6641	10.385	11.0304	10.5913	10.862	10.9933	7.64412	7.35334	7.22227	7.89863	7.13565	7.69805
1019	ENSG00000078304	protein_coding	protein phosphatase 2 regulatory subunit B'gamma [Source:HGNC Symbol;Acc:HGNC:9311]	PPP2R5C	160.975	160.642	155.591	157.201	162.111	164.466	158.333	158.203	161.572	159.461	169.702	157.694	187.004	182.799	182.792	177.08	186.419	185.274
1020	ENSG00000078369	protein_coding	G protein subunit beta 1 [Source:HGNC Symbol;Acc:HGNC:4396]	GNB1	785.837	767.729	773.625	773.993	755.364	793.447	779.517	799.579	797.76	765.12	780.788	764.274	740.206	726.238	708.6	725.861	753.745	735.294
1021	ENSG00000078403	protein_coding	MLLT10 histone lysine methyltransferase DOT1L cofactor [Source:HGNC Symbol;Acc:HGNC:16063]	MLLT10	87.8281	86.2636	90.082	87.1479	88.4764	89.9646	89.5487	91.7793	86.4563	92.1398	87.164	88.8409	97.9887	97.9356	96.8558	100.649	96.0339	98.5127
1022	ENSG00000078549	protein_coding	ADCYAP receptor type I [Source:HGNC Symbol;Acc:HGNC:242]	ADCYAP1R1	246.432	248.669	226.442	251.626	233.007	241.32	236.632	248.566	241.115	244.509	237.488	244.22	164.57	164.061	149.088	154.72	152.355	159.688
1023	ENSG00000078618	protein_coding	nardilysin convertase [Source:HGNC Symbol;Acc:HGNC:7995]	NRDC	178.99	182.365	189.723	180.417	186.415	190.688	180.576	179.782	186.351	187.734	188.811	188.833	195.368	193.148	192.895	191.832	192.578	199.108
1024	ENSG00000078668	protein_coding	voltage dependent anion channel 3 [Source:HGNC Symbol;Acc:HGNC:12674]	VDAC3	102.701	102.015	99.5288	99.0448	99.476	104.502	101.184	99.6692	103.157	101.277	106.34	101.412	97.7672	96.3015	89.5476	91.8796	90.4273	97.3227
1025	ENSG00000078674	protein_coding	pericentriolar material 1 [Source:HGNC Symbol;Acc:HGNC:8727]	PCM1	282.46	283.754	278.962	271.377	288.101	262.22	275.846	247.42	251.99	280.011	281.875	278.989	310.362	331.99	347.916	316.061	335.163	333.842
1026	ENSG00000078687	protein_coding	trinucleotide repeat containing adaptor 6C [Source:HGNC Symbol;Acc:HGNC:29318]	TNRC6C	161.168	154.729	159.921	153.736	148.71	153.206	155.248	153.415	153.726	165.779	155.487	154.801	156.649	154.747	156.526	174.06	154.818	156.75
1027	ENSG00000078699	protein_coding	CBFA2/RUNX1 partner transcriptional co-repressor 2 [Source:HGNC Symbol;Acc:HGNC:1536]	CBFA2T2	188.798	177.986	181.738	179.551	174.455	177.885	177.04	192.258	180.758	184.052	174.194	179.049	178.529	172.449	174.151	171.621	179.071	172.369
1028	ENSG00000078747	protein_coding	itchy E3 ubiquitin protein ligase [Source:HGNC Symbol;Acc:HGNC:13890]	ITCH	60.7104	58.4568	59.3799	59.8311	61.3379	57.4956	60.942	59.4779	60.1233	64.0479	59.8079	57.1233	58.6049	62.2038	60.0566	63.7698	61.3326	58.7581
1029	ENSG00000078804	protein_coding	tumor protein p53 inducible nuclear protein 2 [Source:HGNC Symbol;Acc:HGNC:16104]	TP53INP2	24.1688	23.7125	24.2355	25.6419	25.1692	25.0266	24.6854	24.6813	23.5366	25.2282	22.3944	28.0882	25.2588	27.2346	27.9003	32.0591	25.9517	24.9536
1030	ENSG00000078808	protein_coding	stromal cell derived factor 4 [Source:HGNC Symbol;Acc:HGNC:24188]	SDF4	83.02	76.5397	79.5105	81.6037	78.3415	78.7817	75.2775	82.6081	80.0867	74.8665	73.9553	79.8464	61.3745	61.4412	62.3781	62.9567	66.0472	66.4561
1031	ENSG00000078900	protein_coding	tumor protein p73 [Source:HGNC Symbol;Acc:HGNC:12003]	TP73	31.5412	28.9441	28.5653	28.7605	28.4835	30.0782	27.2567	29.5366	33.0911	28.5011	27.4902	29.824	22.4338	26.1997	23.2145	27.7033	24.2527	23.1313
1032	ENSG00000078902	protein_coding	toll interacting protein [Source:HGNC Symbol;Acc:HGNC:16476]	TOLLIP	30.7078	29.0009	27.6094	27.259	26.322	27.456	25.9068	29.7389	27.0322	27.4556	28.0266	28.3512	25.148	28.5963	22.8275	23.2893	23.9979	24.3586
1033	ENSG00000078967	protein_coding	ubiquitin conjugating enzyme E2 D4 (putative) [Source:HGNC Symbol;Acc:HGNC:21647]	UBE2D4	88.7256	86.7185	83.278	85.6463	82.2802	83.7176	86.8487	88.4076	83.6599	81.9576	82.3364	85.4219	69.351	72.6074	67.5798	67.4287	69.9548	65.6008
1034	ENSG00000079102	protein_coding	RUNX1 partner transcriptional co-repressor 1 [Source:HGNC Symbol;Acc:HGNC:1535]	RUNX1T1	37.4391	40.4307	40.8799	40.2532	42.5571	40.914	39.278	35.1337	38.1402	38.6378	42.3751	41.8168	50.7392	53.3253	55.1128	57.4393	62.7767	55.3739
1035	ENSG00000079134	protein_coding	THO complex 1 [Source:HGNC Symbol;Acc:HGNC:19070]	THOC1	59.8129	62.2098	68.9391	59.9466	69.1673	64.0126	68.3347	62.7147	59.6572	67.2298	67.3845	64.4347	58.9927	63.2932	67.7948	67.4868	67.279	67.6461
1036	ENSG00000079150	protein_coding	FKBP prolyl isomerase 7 [Source:HGNC Symbol;Acc:HGNC:3723]	FKBP7	37.5032	34.9717	37.1687	34.5935	35.5443	34.2429	33.5567	35.8755	31.9259	33.7285	36.3407	33.6112	36.8912	38.7276	35.1656	37.3442	36.8675	39.3084
1037	ENSG00000079156	protein_coding	oxysterol binding protein like 6 [Source:HGNC Symbol;Acc:HGNC:16388]	OSBPL6	21.4762	19.4477	18.1626	18.6539	19.9336	18.5097	18.7712	19.2865	19.4197	21.3644	21.7239	20.0931	14.0696	12.9637	14.0576	13.6484	15.1632	14.7267
1038	ENSG00000079246	protein_coding	X-ray repair cross complementing 5 [Source:HGNC Symbol;Acc:HGNC:12833]	XRCC5	826.61	803.724	773.063	782.252	819.968	820.209	810.502	808.144	818.888	790.484	833.288	795.36	782.968	772.863	752.019	780.744	790.145	791.188
1039	ENSG00000079277	protein_coding	MAPK interacting serine/threonine kinase 1 [Source:HGNC Symbol;Acc:HGNC:7110]	MKNK1	13.4627	12.7945	14.4514	13.3985	12.5366	13.3038	14.3355	10.4525	14.0598	13.2732	12.9405	14.1493	13.848	13.345	12.51	13.4161	14.1439	13.8714
1040	ENSG00000079308	protein_coding	tensin 1 [Source:HGNC Symbol;Acc:HGNC:11973]	TNS1	62.6336	60.9588	59.9984	58.6183	60.0891	61.0433	59.3348	63.4565	56.3947	57.684	55.3156	61.5943	58.328	59.208	62.4641	58.8912	59.039	59.2043
1041	ENSG00000079313	protein_coding	RNA exonuclease 1 homolog [Source:HGNC Symbol;Acc:HGNC:24616]	REXO1	47.5682	46.5152	47.4027	51.9769	45.1028	46.1199	46.6065	46.1257	51.1902	50.2292	50.8904	49.3385	45.6431	42.7038	42.9467	46.1721	44.7252	43.8082
1042	ENSG00000079332	protein_coding	secretion associated Ras related GTPase 1A [Source:HGNC Symbol;Acc:HGNC:10534]	SAR1A	155.077	158.538	157.728	150.386	149.814	145.879	158.141	159.349	162.581	156.142	154.817	146.595	154.212	153.767	148.744	154.256	156.092	150.688
1043	ENSG00000079335	protein_coding	cell division cycle 14A [Source:HGNC Symbol;Acc:HGNC:1718]	CDC14A	8.65459	10.1219	10.0653	9.70235	9.5105	10.0646	10.9284	10.0478	10.0205	9.90947	10.4597	10.2043	12.4632	11.3841	11.8222	8.30517	9.64162	10.5988
1044	ENSG00000079387	protein_coding	SUMO specific peptidase 1 [Source:HGNC Symbol;Acc:HGNC:17927]	SENP1	85.392	85.7518	79.2856	79.1781	80.7432	81.8281	86.463	82.0687	79.8536	79.9576	80.325	80.0042	73.727	71.2457	72.3517	76.1404	75.1791	71.8857
1045	ENSG00000079432	protein_coding	capicua transcriptional repressor [Source:HGNC Symbol;Acc:HGNC:14214]	CIC	116.036	116.231	121.909	121.799	111.868	122.896	113.591	115.584	118.227	108.686	106.675	119.822	105.079	109.211	107.99	111.626	105.76	103.57
1046	ENSG00000079435	protein_coding	lipase E, hormone sensitive type [Source:HGNC Symbol;Acc:HGNC:6621]	LIPE	8.91103	9.09833	8.37841	11.1461	8.64591	9.71757	7.13561	8.76658	9.39912	8.90943	7.84476	8.88935	8.475	8.11591	8.34001	8.82788	8.79214	7.51211
1047	ENSG00000079459	protein_coding	farnesyl-diphosphate farnesyltransferase 1 [Source:HGNC Symbol;Acc:HGNC:3629]	FDFT1	111.548	105.711	111.056	124.109	117.392	129.259	112.884	105.401	105.488	116.686	121.627	117.718	117.93	112.098	112.203	113.717	118.588	115.396
1048	ENSG00000079462	protein_coding	platelet activating factor acetylhydrolase 1b catalytic subunit 3 [Source:HGNC Symbol;Acc:HGNC:8576]	PAFAH1B3	64.3004	60.6745	56.5683	68.2052	60.9056	66.0563	57.6634	62.5799	68.0465	55.6385	58.8022	61.9099	57.1647	56.5935	56.4885	57.962	56.618	58.8696
1049	ENSG00000079482	protein_coding	oligophrenin 1 [Source:HGNC Symbol;Acc:HGNC:8148]	OPHN1	16.5399	15.6946	14.0015	15.131	16.4753	16.0803	18.1926	17.7355	16.4679	15.637	18.6397	16.9897	15.2882	16.8854	18.1417	18.7012	16.4799	17.5902
1050	ENSG00000079616	protein_coding	kinesin family member 22 [Source:HGNC Symbol;Acc:HGNC:6391]	KIF22	120.267	119.529	116.623	122.896	118.449	123.205	119.505	114.91	120.635	121.777	122.164	122.663	125.519	124.626	121.446	134.625	123.43	126.665
1051	ENSG00000079691	protein_coding	capping protein regulator and myosin 1 linker 1 [Source:HGNC Symbol;Acc:HGNC:21581]	CARMIL1	6.53903	6.82375	7.31002	7.62327	7.20492	7.28818	8.42131	7.95736	8.46697	8.54578	8.18	5.62817	7.69951	6.80865	7.73815	7.08553	6.75338	6.24769
1052	ENSG00000079739	protein_coding	phosphoglucomutase 1 [Source:HGNC Symbol;Acc:HGNC:8905]	PGM1	54.4278	52.8272	55.5562	55.8462	57.9276	57.727	52.0064	56.9828	56.8608	55.2294	56.1872	56.0713	58.4941	60.6787	56.7464	58.5428	59.761	58.7952
1053	ENSG00000079785	protein_coding	DEAD-box helicase 1 [Source:HGNC Symbol;Acc:HGNC:2734]	DDX1	210.21	213.072	221.325	215.011	220.423	212.861	224.611	214.174	203.673	223.418	220.257	219.446	221.403	217.06	218.603	225.053	232.036	225.698
1054	ENSG00000079805	protein_coding	dynamin 2 [Source:HGNC Symbol;Acc:HGNC:2974]	DNM2	122.767	118.165	113.305	125.322	111.772	120.428	117.898	120.507	119.081	117.414	118.275	116.982	108.679	106.106	107.775	108.838	108.989	109.149
1055	ENSG00000079841	protein_coding	regulating synaptic membrane exocytosis 1 [Source:HGNC Symbol;Acc:HGNC:17282]	RIMS1	8.33405	8.35909	9.89665	8.60506	8.11755	8.09797	7.77846	8.36197	7.45715	7.81848	9.99033	8.52115	9.30588	7.18993	8.29702	8.36325	8.74966	8.66495
1056	ENSG00000079950	protein_coding	syntaxin 7 [Source:HGNC Symbol;Acc:HGNC:11442]	STX7	15.5783	15.0691	15.6322	12.9942	15.3225	13.728	15.1712	15.5101	14.7589	16.0915	16.8964	15.8851	14.9005	14.5977	14.5305	14.4034	13.5068	14.4292
1057	ENSG00000079974	protein_coding	RAB, member of RAS oncogene family like 2B [Source:HGNC Symbol;Acc:HGNC:9800]	RABL2B	25.0022	25.9871	25.1352	22.8121	22.1431	23.2913	23.9139	25.3556	21.6723	23.3645	24.2718	23.2491	17.7255	19.9357	21.9677	20.9662	21.1946	20.6769
1058	ENSG00000079999	protein_coding	kelch like ECH associated protein 1 [Source:HGNC Symbol;Acc:HGNC:23177]	KEAP1	54.3637	53.2252	51.8449	53.8249	50.5786	55.259	53.9349	54.3528	55.9286	55.7294	57.4612	55.1771	52.8441	47.9329	45.6551	48.0306	48.0382	50.9856
1059	ENSG00000080031	protein_coding	protein tyrosine phosphatase receptor type H [Source:HGNC Symbol;Acc:HGNC:9672]	PTPRH	1.53859	2.04712	2.02431	2.25233	2.35361	3.20063	1.73569	2.83228	1.94197	2.22736	2.01148	2.62999	2.65882	2.56005	2.53639	1.80042	2.16618	2.52883
1060	ENSG00000080189	protein_coding	solute carrier family 35 member C2 [Source:HGNC Symbol;Acc:HGNC:17117]	SLC35C2	52.5686	55.443	55.0501	60.1776	55.8622	55.9146	52.0064	56.7804	52.8215	56.5476	52.9689	55.9135	59.325	58.6088	58.466	57.4393	56.7029	60.4687
1061	ENSG00000080200	protein_coding	crystallin beta-gamma domain containing 3 [Source:HGNC Symbol;Acc:HGNC:34427]	CRYBG3	15.1295	14.7279	12.427	17.5566	17.0036	15.9646	14.7855	15.0381	13.2054	16.0006	16.293	17.8313	17.5593	21.1885	17.9697	17.2492	16.7773	18.334
1062	ENSG00000080224	protein_coding	EPH receptor A6 [Source:HGNC Symbol;Acc:HGNC:19296]	EPHA6	2.11557	2.33145	1.51824	2.42559	1.96935	2.1209	2.50711	1.68588	2.5634	2.27281	2.41377	2.62999	3.04657	3.10474	3.82609	3.54277	3.39793	3.71886
1063	ENSG00000080298	protein_coding	regulatory factor X3 [Source:HGNC Symbol;Acc:HGNC:9984]	RFX3	80.071	75.3456	82.7719	72.7676	77.0927	75.234	78.4917	72.2905	78.3001	85.4578	81.5318	73.1662	89.9569	93.8504	102.144	93.622	93.4855	94.7195
1064	ENSG00000080345	protein_coding	replication timing regulatory factor 1 [Source:HGNC Symbol;Acc:HGNC:23207]	RIF1	342.273	345.452	320.685	327.396	354.578	318.675	326.567	310.674	312.19	326.558	337.928	342.424	294.631	340.269	350.108	315.539	337.457	341.169
1065	ENSG00000080371	protein_coding	RAB21, member RAS oncogene family [Source:HGNC Symbol;Acc:HGNC:18263]	RAB21	49.6838	52.8272	48.9209	48.2807	52.3077	47.1611	52.5207	53.2064	50.9572	53.002	47.739	49.4963	51.5147	52.4538	49.8251	50.8184	50.9689	47.2668
1066	ENSG00000080503	protein_coding	SWI/SNF related, matrix associated, actin dependent regulator of chromatin, subfamily a, member 2 [Source:HGNC Symbol;Acc:HGNC:11098]	SMARCA2	46.863	45.4917	44.5911	44.2381	43.3736	46.4284	46.1565	46.8675	42.3349	44.6835	47.3367	47.9183	52.2902	51.6368	54.296	52.2123	51.691	48.5312
1067	ENSG00000080546	protein_coding	sestrin 1 [Source:HGNC Symbol;Acc:HGNC:21595]	SESN1	24.6175	25.8165	26.5972	23.8516	26.6582	25.3351	28.1567	25.0859	27.5759	26.8192	25.2105	27.3519	26.976	27.1257	26.6536	26.3675	25.9092	25.6602
1068	ENSG00000080603	protein_coding	Snf2 related CREBBP activator protein [Source:HGNC Symbol;Acc:HGNC:16974]	SRCAP	17.8221	17.0594	17.2629	17.5566	18.2525	18.2012	16.3283	17.6006	18.3322	17.0006	16.4941	17.0423	16.8392	16.0684	16.1211	20.5597	16.4375	16.4374
1069	ENSG00000080608	protein_coding	pumilio RNA binding family member 3 [Source:HGNC Symbol;Acc:HGNC:29676]	PUM3	81.1609	77.2221	82.6032	76.6947	78.5337	78.1647	80.6131	72.7626	71.6197	82.1849	75.9668	75.3228	77.1059	77.1284	79.1441	81.4836	79.3416	80.2903
1070	ENSG00000080644	protein_coding	cholinergic receptor nicotinic alpha 3 subunit [Source:HGNC Symbol;Acc:HGNC:1957]	CHRNA3	232.969	230.302	209.292	231.412	218.165	214.905	219.468	245.127	223.171	217.69	218.513	223.286	154.544	151.424	144.961	138.284	149.211	146.97
1071	ENSG00000080802	protein_coding	CCR4-NOT transcription complex subunit 4 [Source:HGNC Symbol;Acc:HGNC:7880]	CNOT4	51.1583	54.1351	52.5197	51.3993	51.9715	52.444	56.2492	51.7228	52.5884	50.2746	54.1087	51.8633	53.0103	54.7415	54.5969	56.6262	51.4786	53.9607
1072	ENSG00000080815	protein_coding	presenilin 1 [Source:HGNC Symbol;Acc:HGNC:9508]	PSEN1	77.5067	78.0182	75.1808	73.5184	72.5776	76.6223	71.549	79.1015	79.2322	74.1846	76.3691	76.48	92.6711	85.2987	91.955	92.7508	90.4273	85.162
1073	ENSG00000080819	protein_coding	coproporphyrinogen oxidase [Source:HGNC Symbol;Acc:HGNC:2321]	CPOX	16.4758	19.1065	19.1747	17.2679	15.2264	18.1626	20.6354	17.7355	20.6625	17.5916	16.8294	17.0423	18.1132	18.7919	18.1417	17.1911	18.0515	17.9249
1074	ENSG00000080822	protein_coding	claudin domain containing 1 [Source:HGNC Symbol;Acc:HGNC:1322]	CLDND1	87.1229	81.032	85.471	83.5672	85.1622	83.9876	80.1631	82.8779	85.4465	88.367	86.8287	83.0024	80.5956	87.3141	81.9814	86.4784	85.4579	85.943
1075	ENSG00000080823	protein_coding	MOK protein kinase [Source:HGNC Symbol;Acc:HGNC:9833]	MOK	5.5133	5.85705	5.28571	5.77521	5.95607	5.93851	6.29991	7.21557	6.29197	6.95481	5.36394	6.62756	7.7549	7.2444	7.60918	8.30517	6.62596	6.43364
1076	ENSG00000080824	protein_coding	heat shock protein 90 alpha family class A member 1 [Source:HGNC Symbol;Acc:HGNC:5253]	HSP90AA1	1900.29	1874.94	1886.77	1814.4	1934.33	1792.2	1876.73	1761.41	1645.31	1859.62	1882.74	1802.49	1390.79	1388.69	1410.49	1384.99	1418.29	1430.87
1077	ENSG00000080839	protein_coding	RB transcriptional corepressor like 1 [Source:HGNC Symbol;Acc:HGNC:9893]	RBL1	52.6969	54.1351	57.0744	49.0315	55.2858	50.4002	56.8277	53.3413	50.7242	56.6385	53.9076	51.7581	54.1182	52.236	53.1353	59.1816	53.7297	57.3821
1078	ENSG00000080845	protein_coding	DLG associated protein 4 [Source:HGNC Symbol;Acc:HGNC:24476]	DLGAP4	103.791	100.821	102.734	103.434	95.8735	105.042	101.634	102.164	99.8947	100.686	97.4225	106.725	111.283	109.864	109.194	113.543	106.058	106.211
1079	ENSG00000080854	protein_coding	immunoglobulin superfamily member 9B [Source:HGNC Symbol;Acc:HGNC:32326]	IGSF9B	399.65	396.403	411.329	400.973	374.656	374.821	367.773	401.105	379.149	364.105	340.141	375.141	364.702	365.924	370.7	343.881	344.38	352.214
1080	ENSG00000080986	protein_coding	NDC80 kinetochore complex component [Source:HGNC Symbol;Acc:HGNC:16909]	NDC80	64.3645	62.8354	64.047	60.0621	60.4733	57.9969	64.9919	62.5124	58.8027	60.5932	64.4343	59.7533	79.2662	79.9608	74.8881	72.7138	75.7313	76.0508
1081	ENSG00000081014	protein_coding	adaptor related protein complex 4 subunit epsilon 1 [Source:HGNC Symbol;Acc:HGNC:573]	AP4E1	45.068	43.6151	42.2294	43.0253	49.0895	43.7291	48.085	42.4167	42.8009	45.6381	46.8003	42.2902	44.8123	44.3924	46.3429	43.9071	45.872	47.4899
1082	ENSG00000081019	protein_coding	round spermatid basic protein 1 [Source:HGNC Symbol;Acc:HGNC:25642]	RSBN1	63.5952	60.5039	59.4361	55.673	65.4207	62.0073	59.8491	58.3989	61.9099	60.1841	66.8481	60.2793	69.5726	72.1717	67.7088	70.1003	70.7618	68.3899
1083	ENSG00000081026	protein_coding	membrane associated guanylate kinase, WW and PDZ domain containing 3 [Source:HGNC Symbol;Acc:HGNC:29647]	MAGI3	183.734	175.484	179.208	184.98	182.236	182.243	166.048	167.577	167.786	177.279	177.882	178.523	184.013	188.463	190.187	180.275	186.504	180.848
1084	ENSG00000081059	protein_coding	transcription factor 7 [Source:HGNC Symbol;Acc:HGNC:11639]	TCF7	49.4915	53.339	47.0653	48.3962	45.5831	46.8911	46.4136	51.1159	45.7527	46.5018	44.6548	46.8137	35.2848	36.6033	37.616	37.7508	36.6551	35.8127
1085	ENSG00000081087	protein_coding	osteoclastogenesis associated transmembrane protein 1 [Source:HGNC Symbol;Acc:HGNC:21652]	OSTM1	18.7837	18.7084	19.0061	18.1919	20.558	17.8541	21.5997	17.8029	18.5652	18.2734	20.9194	18.8307	15.5652	16.6676	18.0557	17.4234	16.31	16.2514
1086	ENSG00000081154	protein_coding	PEST proteolytic signal containing nuclear protein [Source:HGNC Symbol;Acc:HGNC:30023]	PCNP	178.669	173.721	178.083	159.8	175.368	168.129	181.669	167.644	175.631	172.779	183.044	161.113	179.138	176.97	175.269	174.467	176.48	172.63
1087	ENSG00000081177	protein_coding	exonuclease 3'-5' domain containing 2 [Source:HGNC Symbol;Acc:HGNC:20217]	EXD2	44.7475	45.4917	43.6352	42.5055	46.88	46.5055	43.5208	43.698	48.4715	43.7289	44.0513	46.9715	51.2931	46.4622	47.7186	49.2503	48.1231	47.6758
1088	ENSG00000081181	protein_coding	arginase 2 [Source:HGNC Symbol;Acc:HGNC:664]	ARG2	22.3096	20.6987	22.6048	21.4838	22.1912	22.2501	21.7283	22.4559	21.517	22.319	24.4059	22.7231	21.4922	21.7332	20.1622	20.1531	21.4494	21.4207
1089	ENSG00000081189	protein_coding	myocyte enhancer factor 2C [Source:HGNC Symbol;Acc:HGNC:6996]	MEF2C	6.98778	6.53943	7.31002	6.58373	7.87738	7.78948	7.07133	6.81096	6.36965	6.81844	6.50377	7.67956	9.02892	6.97206	8.21104	8.88596	8.23997	8.70214
1090	ENSG00000081307	protein_coding	ubiquitin like modifier activating enzyme 5 [Source:HGNC Symbol;Acc:HGNC:23230]	UBA5	75.1347	73.2984	71.582	71.035	73.5382	66.2877	70.8418	67.7724	67.5804	67.6389	71.6086	69.6946	68.077	68.4133	72.9966	65.6283	73.3528	70.9187
1091	ENSG00000081320	protein_coding	serine/threonine kinase 17b [Source:HGNC Symbol;Acc:HGNC:11396]	STK17B	13.1422	13.3632	14.4514	11.8969	12.0562	12.6483	13.9498	14.7683	13.3607	12.7732	12.3371	13.4655	15.8976	16.6676	15.0894	13.7064	15.7579	14.5408
1092	ENSG00000081377	protein_coding	cell division cycle 14B [Source:HGNC Symbol;Acc:HGNC:1719]	CDC14B	44.1064	40.317	43.8601	42.0435	42.7012	39.5258	42.8779	46.6652	39.6938	42.7289	41.5035	42.7636	40.1039	40.634	44.1075	39.9578	40.5203	40.015
1093	ENSG00000081386	protein_coding	zinc finger protein 510 [Source:HGNC Symbol;Acc:HGNC:29161]	ZNF510	70.3907	72.1043	79.3419	64.3935	68.4948	69.1413	71.8704	70.9418	66.1045	67.9571	66.781	66.1178	68.9079	65.1996	70.933	63.3052	64.4332	63.5182
1094	ENSG00000081665	protein_coding	zinc finger protein 506 [Source:HGNC Symbol;Acc:HGNC:23780]	ZNF506	35.1953	35.7678	38.1246	33.0342	36.7931	31.9677	37.3495	31.9643	35.9652	35.0468	37.6146	33.8216	34.3431	35.2416	40.4103	43.849	33.8518	35.478
1095	ENSG00000081692	protein_coding	jumonji domain containing 4 [Source:HGNC Symbol;Acc:HGNC:25724]	JMJD4	19.1683	18.4241	17.2629	20.3287	20.3659	19.1652	18.7069	20.3654	19.575	21.1826	15.6895	20.7769	18.1686	17.648	18.0987	16.9588	16.9047	17.2183
1096	ENSG00000081721	protein_coding	dual specificity phosphatase 12 [Source:HGNC Symbol;Acc:HGNC:3067]	DUSP12	39.5547	39.1797	42.9604	36.2105	38.8105	40.1043	38.6352	41.068	37.2857	38.6833	39.0226	36.662	38.7745	37.5293	36.4123	38.622	42.4741	41.5025
1097	ENSG00000081760	protein_coding	acetoacetyl-CoA synthetase [Source:HGNC Symbol;Acc:HGNC:21298]	AACS	29.6821	30.7637	30.5896	28.2985	29.0118	28.1115	28.1567	28.7274	28.1973	33.1831	27.9595	28.6142	28.5824	30.2304	32.5432	33.9757	31.5158	31.0153
1098	ENSG00000081791	protein_coding	DAP3 binding cell death enhancer 1 [Source:HGNC Symbol;Acc:HGNC:28969]	DELE1	73.532	76.824	77.3175	80.1021	77.7171	77.7791	71.6775	75.0554	77.0572	73.5482	72.0109	73.1662	78.9892	83.2289	82.5403	80.6705	86.2224	84.9017
1099	ENSG00000081818	protein_coding	protocadherin beta 4 [Source:HGNC Symbol;Acc:HGNC:8689]	PCDHB4	17.9503	16.2633	17.1504	18.3074	16.4753	15.2319	15.2998	16.3868	17.2447	14.7278	15.019	15.3065	16.8946	18.3561	20.3771	18.3527	17.1595	18.7803
1100	ENSG00000081870	protein_coding	heat shock protein family B (small) member 11 [Source:HGNC Symbol;Acc:HGNC:25019]	HSPB11	31.0924	32.8677	32.2203	32.0524	32.9985	31.2736	30.5353	32.1666	33.3241	31.4557	32.1836	28.509	29.0255	27.6703	27.1265	30.8976	28.1603	27.8543
1101	ENSG00000081913	protein_coding	PH domain and leucine rich repeat protein phosphatase 1 [Source:HGNC Symbol;Acc:HGNC:20610]	PHLPP1	25.6432	25.2479	23.3358	25.2954	22.3833	24.8723	23.5925	23.3326	23.3813	23.9555	21.7239	22.7231	27.3083	25.4916	24.3322	24.1605	24.1253	25.2883
1102	ENSG00000082014	protein_coding	SWI/SNF related, matrix associated, actin dependent regulator of chromatin, subfamily d, member 3 [Source:HGNC Symbol;Acc:HGNC:11108]	SMARCD3	35.1312	37.4169	37.0562	40.7152	34.6317	36.1324	33.4281	38.8427	38.917	37.0923	35.1338	35.0314	33.6784	34.479	34.5207	32.1753	35.3809	38.1556
1103	ENSG00000082068	protein_coding	WD repeat domain 70 [Source:HGNC Symbol;Acc:HGNC:25495]	WDR70	29.7462	32.0148	32.6702	30.3198	31.0772	30.1553	32.1424	30.9528	30.9938	30.5921	32.9212	30.2448	32.349	29.3044	30.5227	33.7434	31.9405	31.945
1104	ENSG00000082146	protein_coding	STE20 related adaptor beta [Source:HGNC Symbol;Acc:HGNC:13205]	STRADB	21.7968	20.3007	23.1671	22.1768	23.44	22.8671	21.4068	20.0283	21.0509	23.4554	24.1377	21.3555	22.8216	24.4022	22.7846	22.302	23.1484	22.5735
1105	ENSG00000082153	protein_coding	basic leucine zipper and W2 domains 1 [Source:HGNC Symbol;Acc:HGNC:18380]	BZW1	156.873	159.619	149.181	159.8	159.709	153.476	156.919	161.845	156.445	160.688	161.253	155.906	137.65	141.783	132.838	137.703	134.558	140.462
1106	ENSG00000082196	protein_coding	C1q and TNF related 3 [Source:HGNC Symbol;Acc:HGNC:14326]	C1QTNF3	8.46227	8.81401	8.49087	7.21901	8.50181	8.52215	8.8713	7.82248	8.93304	9.0458	7.44246	8.46855	10.4137	10.8394	11.0913	10.8025	10.8309	11.3797
1107	ENSG00000082212	protein_coding	malic enzyme 2 [Source:HGNC Symbol;Acc:HGNC:6984]	ME2	120.78	119.359	119.153	114.176	119.554	116.341	121.563	117.809	126.072	115.004	120.085	116.403	118.927	116.019	114.181	111.742	110.475	114.578
1108	ENSG00000082213	protein_coding	chromosome 5 open reading frame 22 [Source:HGNC Symbol;Acc:HGNC:25639]	C5orf22	48.1452	46.4015	47.965	46.6637	46.3517	47.778	46.4136	48.0813	47.4616	48.1382	50.2869	44.9728	43.926	44.7192	44.8813	44.6621	47.2737	43.1388
1109	ENSG00000082258	protein_coding	cyclin T2 [Source:HGNC Symbol;Acc:HGNC:1600]	CCNT2	109.368	104.688	114.149	105.398	113.117	101.572	103.948	104.187	101.215	106.868	102.384	99.4135	107.572	108.121	108.893	108.548	112.217	110.45
1110	ENSG00000082269	protein_coding	family with sequence similarity 135 member A [Source:HGNC Symbol;Acc:HGNC:21084]	FAM135A	31.7976	28.148	31.2082	29.2225	29.6362	28.9985	30.3424	29.0646	28.275	31.5466	29.971	29.4032	29.0809	31.0474	31.1675	28.5164	30.9636	30.1972
1111	ENSG00000082438	protein_coding	cordon-bleu WH2 repeat protein like 1 [Source:HGNC Symbol;Acc:HGNC:23571]	COBLL1	14.4243	14.7279	13.158	11.8969	13.8335	13.6894	12.4712	11.3966	10.7197	13.0914	14.4156	11.0985	10.4137	9.91339	12.2951	9.52482	12.6573	10.636
1112	ENSG00000082458	protein_coding	discs large MAGUK scaffold protein 3 [Source:HGNC Symbol;Acc:HGNC:2902]	DLG3	19.1042	22.3478	19.8495	19.7512	19.5013	18.5097	18.8997	18.9493	18.7982	20.3189	20.1148	17.5157	19.5534	21.7877	19.8183	18.2946	18.3488	17.7762
1113	ENSG00000082497	protein_coding	SERTA domain containing 4 [Source:HGNC Symbol;Acc:HGNC:25236]	SERTAD4	65.5826	68.1806	70.1762	65.6063	69.5035	67.0975	73.1561	69.5931	64.2402	67.548	74.6258	67.3276	76.8289	72.0627	72.6096	80.2059	79.1292	77.9102
1114	ENSG00000082512	protein_coding	TNF receptor associated factor 5 [Source:HGNC Symbol;Acc:HGNC:12035]	TRAF5	70.9036	72.1043	73.6063	71.0928	68.8791	63.4727	70.199	70.6047	69.2893	68.639	66.781	66.1178	65.7505	73.4245	74.8881	67.3126	72.4608	68.6874
1115	ENSG00000082515	protein_coding	mitochondrial ribosomal protein L22 [Source:HGNC Symbol;Acc:HGNC:14480]	MRPL22	19.2324	20.0732	18.3875	19.6935	19.3092	19.1266	21.5997	22.0513	16.8563	18.6825	20.6512	18.9885	17.9471	18.4106	18.4856	19.1077	17.6267	17.4415
1116	ENSG00000082516	protein_coding	gem nuclear organelle associated protein 5 [Source:HGNC Symbol;Acc:HGNC:20043]	GEMIN5	79.1094	67.8963	74.6185	69.3025	68.2546	74.5014	78.8774	74.2462	74.4161	69.0026	71.6086	69.905	67.6892	70.9189	69.6434	64.5248	64.1359	66.1958
1117	ENSG00000082641	protein_coding	nuclear factor, erythroid 2 like 1 [Source:HGNC Symbol;Acc:HGNC:7781]	NFE2L1	252.586	248.953	245.785	250.528	250.587	256.59	247.432	257.805	241.581	249.373	240.304	242.38	227.828	231.984	230.253	238.178	228.468	232.503
1118	ENSG00000082684	protein_coding	semaphorin 5B [Source:HGNC Symbol;Acc:HGNC:10737]	SEMA5B	1.41038	1.59221	2.98024	1.50155	2.01738	2.42939	1.41427	2.2928	1.78661	1.54551	2.34672	2.05139	4.59755	3.97625	5.45969	4.76241	6.62596	5.87581
1119	ENSG00000082701	protein_coding	glycogen synthase kinase 3 beta [Source:HGNC Symbol;Acc:HGNC:4617]	GSK3B	182.323	187.767	177.746	182.15	190.402	187.796	185.719	177.894	177.03	184.052	182.776	181.942	196.365	202.625	196.807	202.925	208.463	199.443
1120	ENSG00000082805	protein_coding	ELKS/RAB6-interacting/CAST family member 1 [Source:HGNC Symbol;Acc:HGNC:17072]	ERC1	130.332	128.571	131.637	128.094	133.195	131.958	135.127	132.106	132.675	133.005	129.07	125.976	131.612	132.36	124.197	137.471	129.206	124.545
1121	ENSG00000082898	protein_coding	exportin 1 [Source:HGNC Symbol;Acc:HGNC:12825]	XPO1	559.407	571.546	582.046	555.459	579.42	545.842	580.556	545.618	553.926	573.067	583.797	554.138	566.717	569.639	568.84	550.058	539.039	544.553
1122	ENSG00000082996	protein_coding	ring finger protein 13 [Source:HGNC Symbol;Acc:HGNC:10057]	RNF13	25.2586	26.7264	26.7097	23.6206	28.1472	26.1834	25.7139	24.479	23.6143	26.6828	28.563	25.9317	26.5328	25.9818	25.149	28.1679	29.3496	25.5858
1123	ENSG00000083093	protein_coding	partner and localizer of BRCA2 [Source:HGNC Symbol;Acc:HGNC:26144]	PALB2	40.3881	41.0562	42.5106	38.8671	40.2995	40.567	43.3279	35.6058	39.7715	40.047	43.8502	41.396	37.0574	38.9455	37.8739	38.0993	41.7096	38.7134
1124	ENSG00000083097	protein_coding	DOP1 leucine zipper like protein A [Source:HGNC Symbol;Acc:HGNC:21194]	DOP1A	40.7086	39.3503	41.4422	42.7365	43.95	42.3023	39.6637	35.6058	38.0625	39.9106	43.9843	43.2896	43.7044	45.4273	44.9673	43.7328	43.9607	44.8867
1125	ENSG00000083099	protein_coding	LYR motif containing 2 [Source:HGNC Symbol;Acc:HGNC:25229]	LYRM2	61.4156	58.3999	61.7978	57.3478	58.8882	60.4649	58.692	55.0271	56.9384	61.1387	63.0933	56.7025	60.1005	62.5851	54.5969	54.8838	56.2782	53.4029
1126	ENSG00000083123	protein_coding	branched chain keto acid dehydrogenase E1 subunit beta [Source:HGNC Symbol;Acc:HGNC:987]	BCKDHB	29.041	28.2617	28.4529	26.6237	30.5969	27.5331	26.4853	26.8392	26.9545	31.8648	29.1664	27.1941	30.0779	29.5768	32.6292	34.2661	30.8362	29.974
1127	ENSG00000083168	protein_coding	lysine acetyltransferase 6A [Source:HGNC Symbol;Acc:HGNC:13013]	KAT6A	180.144	176.394	173.585	169.387	172.246	172.333	177.619	176.95	165.844	172.779	168.428	171.738	183.071	181.764	184.856	179.81	175.503	173.597
1128	ENSG00000083223	protein_coding	terminal uridylyl transferase 7 [Source:HGNC Symbol;Acc:HGNC:25817]	TUT7	31.7976	29.797	32.6139	31.4171	32.182	34.3585	32.721	28.66	29.2848	33.5013	32.3177	31.8228	33.9554	30.884	34.0479	31.943	31.3884	30.4203
1129	ENSG00000083290	protein_coding	unc-51 like autophagy activating kinase 2 [Source:HGNC Symbol;Acc:HGNC:13480]	ULK2	63.4029	71.0239	65.6777	66.1261	66.5735	63.9354	65.5062	69.5931	65.9492	63.7751	61.6853	66.9594	69.5726	70.2108	70.6321	71.378	70.5495	71.0303
1130	ENSG00000083312	protein_coding	transportin 1 [Source:HGNC Symbol;Acc:HGNC:6401]	TNPO1	417.023	421.082	414.197	412.234	424.13	419.167	432.508	400.97	412.94	431.244	436.289	424.217	466.901	472.738	473.016	459.282	488.749	483.192
1131	ENSG00000083444	protein_coding	procollagen-lysine,2-oxoglutarate 5-dioxygenase 1 [Source:HGNC Symbol;Acc:HGNC:9081]	PLOD1	59.6205	58.9686	55.1626	58.0408	56.2945	58.8838	57.4706	62.3776	55.6956	55.3203	56.9918	58.0701	59.1034	55.2862	57.0474	55.9873	57.3825	55.4111
1132	ENSG00000083457	protein_coding	integrin subunit alpha E [Source:HGNC Symbol;Acc:HGNC:6147]	ITGAE	13.2063	12.6808	13.0456	13.1675	14.9862	13.111	13.3712	11.8012	14.8366	15.7279	13.9462	14.5175	11.9093	9.91339	11.3493	10.3379	12.275	12.2723
1133	ENSG00000083520	protein_coding	DIS3 homolog, exosome endoribonuclease and 3'-5' exoribonuclease [Source:HGNC Symbol;Acc:HGNC:20604]	DIS3	167.002	167.352	160.989	159.627	166.722	149.851	159.555	150.246	145.88	156.597	158.102	161.744	161.08	167.438	169.981	167.265	174.611	169.357
1134	ENSG00000083535	protein_coding	progesterone immunomodulatory binding factor 1 [Source:HGNC Symbol;Acc:HGNC:23352]	PIBF1	46.1578	48.6192	48.3024	45.3931	49.6179	41.0683	48.8564	40.7309	40.0045	51.3201	45.9287	45.078	48.9113	52.5628	54.296	49.5407	51.1388	52.5847
1135	ENSG00000083544	protein_coding	tudor domain containing 3 [Source:HGNC Symbol;Acc:HGNC:20612]	TDRD3	41.4779	41.2837	40.3176	37.0768	42.0767	39.2173	39.5994	40.2588	38.2179	41.0015	42.3751	40.9226	44.2583	48.4231	50.4699	46.9852	47.9108	45.3701
1136	ENSG00000083635	protein_coding	nuclear FMR1 interacting protein 1 [Source:HGNC Symbol;Acc:HGNC:8057]	NUFIP1	25.0022	25.0204	25.3602	23.1586	25.8417	23.5998	26.421	25.8277	24.3911	24.0918	24.8753	23.8277	25.2588	24.0209	23.6443	23.2893	23.7005	23.7264
1137	ENSG00000083642	protein_coding	PDS5 cohesin associated factor B [Source:HGNC Symbol;Acc:HGNC:20418]	PDS5B	189.76	186.231	190.117	177.472	183.533	176.15	182.954	167.509	171.747	187.916	187.738	178.892	195.479	201.699	203.341	195.898	203.451	195.947
1138	ENSG00000083720	protein_coding	3-oxoacid CoA-transferase 1 [Source:HGNC Symbol;Acc:HGNC:8527]	OXCT1	85.392	88.0832	84.5151	82.1234	90.5419	81.9052	89.7415	90.7004	82.7278	84.5032	87.2981	85.4219	79.8755	78.8169	76.9086	76.4308	79.0868	78.3193
1139	ENSG00000083750	protein_coding	Ras related GTP binding B [Source:HGNC Symbol;Acc:HGNC:19901]	RRAGB	9.488	8.75714	10.2903	10.3954	9.84673	9.25483	10.0927	9.71067	10.4866	9.90947	9.58804	10.4147	13.6265	11.493	13.3268	13.5903	12.4024	12.6813
1140	ENSG00000083799	protein_coding	CYLD lysine 63 deubiquitinase [Source:HGNC Symbol;Acc:HGNC:2584]	CYLD	57.1203	57.7175	56.0622	55.0955	56.9669	54.295	57.7277	59.8825	57.4822	57.8204	59.8079	56.0187	51.0162	51.31	50.5989	50.7022	51.5211	50.8369
1141	ENSG00000083807	protein_coding	solute carrier family 27 member 5 [Source:HGNC Symbol;Acc:HGNC:10999]	SLC27A5	5.5133	4.37857	3.93617	4.67792	4.61115	5.28296	5.01421	4.92277	5.20447	4.45471	4.89459	4.41838	4.15441	5.39245	5.80361	5.22703	4.33236	4.61139
1142	ENSG00000083812	protein_coding	zinc finger protein 324 [Source:HGNC Symbol;Acc:HGNC:14096]	ZNF324	19.7453	17.0025	17.4316	18.4229	18.6848	18.0084	19.6711	21.4444	19.0313	19.2735	18.1703	19.6723	15.9529	17.7025	15.3473	15.2746	16.1826	16.5861
1143	ENSG00000083817	protein_coding	zinc finger protein 416 [Source:HGNC Symbol;Acc:HGNC:20645]	ZNF416	9.03924	8.58655	7.8161	8.83606	8.69394	8.90777	7.5856	8.56427	8.70001	8.63669	8.78345	8.20556	8.75196	8.71507	8.08207	8.47941	8.40987	9.14841
1144	ENSG00000083828	protein_coding	zinc finger protein 586 [Source:HGNC Symbol;Acc:HGNC:25949]	ZNF586	11.2189	10.9749	13.4392	12.0702	12.8248	11.3372	11.8927	11.3966	10.1759	12.7278	11.8007	11.4667	12.5186	12.4734	13.3698	12.4868	11.553	12.7185
1145	ENSG00000083838	protein_coding	zinc finger protein 446 [Source:HGNC Symbol;Acc:HGNC:21036]	ZNF446	10.3214	12.0553	10.5714	12.7632	11.3357	10.2574	11.1856	11.7337	11.6518	10.1822	9.92328	10.7303	12.6294	12.3645	11.0054	12.661	12.1476	12.0119
1146	ENSG00000083844	protein_coding	zinc finger protein 264 [Source:HGNC Symbol;Acc:HGNC:13057]	ZNF264	50.6454	49.2447	49.5395	49.0892	49.9541	49.3205	51.8135	52.8692	52.6661	52.002	50.6892	49.6541	49.9083	51.1466	51.2008	54.1869	49.185	48.8287
1147	ENSG00000083845	protein_coding	ribosomal protein S5 [Source:HGNC Symbol;Acc:HGNC:10426]	RPS5	525.109	523.382	486.004	550.666	516.929	550.624	502.386	510.889	535.517	515.565	543.702	530.468	537.747	537.774	504.785	533.099	564.566	537.302
1148	ENSG00000083857	protein_coding	FAT atypical cadherin 1 [Source:HGNC Symbol;Acc:HGNC:3595]	FAT1	68.4675	64.7688	53.0258	64.5668	62.6348	66.1335	67.4347	71.1441	64.6286	64.8661	69.3959	73.7448	72.5084	69.2848	67.7518	66.4995	66.0047	68.2784
1149	ENSG00000083896	protein_coding	YTH domain containing 1 [Source:HGNC Symbol;Acc:HGNC:30626]	YTHDC1	106.548	109.578	107.12	102.337	110.812	103.847	107.484	101.153	103.701	106.959	107.815	102.464	117.431	116.782	114.783	114.124	116.549	111.566
1150	ENSG00000083937	protein_coding	charged multivesicular body protein 2B [Source:HGNC Symbol;Acc:HGNC:24537]	CHMP2B	20.8992	19.2771	22.0988	20.5597	22.5754	18.3168	24.1068	20.5677	22.2938	19.8644	23.5343	19.1463	19.9966	20.0991	19.0874	19.2819	19.7929	19.4869
1151	ENSG00000084070	protein_coding	small ArfGAP2 [Source:HGNC Symbol;Acc:HGNC:25082]	SMAP2	40.7086	37.6444	35.313	39.6757	34.9199	38.099	37.3495	38.1683	38.5286	36.5468	36.9441	35.7152	32.349	33.4441	30.1358	33.8596	32.4927	30.5319
1152	ENSG00000084072	protein_coding	peptidylprolyl isomerase E [Source:HGNC Symbol;Acc:HGNC:9258]	PPIE	53.0815	52.9409	52.4072	52.7276	53.7487	55.0277	49.6921	52.2623	56.317	52.5929	56.9248	55.2297	59.7682	55.6675	54.6399	58.717	55.8959	60.9894
1153	ENSG00000084073	protein_coding	zinc metallopeptidase STE24 [Source:HGNC Symbol;Acc:HGNC:12877]	ZMPSTE24	78.853	79.7241	77.9923	77.561	78.8699	78.1262	80.356	78.4272	82.1063	77.1393	79.3192	76.9534	72.7299	65.7443	67.5369	64.8152	63.2014	67.4602
1154	ENSG00000084090	protein_coding	StAR related lipid transfer domain containing 7 [Source:HGNC Symbol;Acc:HGNC:18063]	STARD7	222.455	222.966	224.53	219.92	223.208	227.63	220.304	227.594	237.619	232.327	226.492	216.553	200.963	200.61	195.13	197.175	196.315	197.658
1155	ENSG00000084092	protein_coding	nitric oxide associated 1 [Source:HGNC Symbol;Acc:HGNC:28473]	NOA1	25.4509	22.3478	25.3039	24.9489	27.7149	26.5305	25.1996	23.4	27.9643	27.4556	28.8312	26.9311	37.8882	34.7513	33.1451	34.6727	36.0605	36.5564
1156	ENSG00000084093	protein_coding	RE1 silencing transcription factor [Source:HGNC Symbol;Acc:HGNC:9966]	REST	53.2738	56.694	54.7127	52.4389	52.5479	47.778	53.7421	50.3741	52.8215	54.9112	54.8463	48.2339	50.3515	54.3603	54.21	55.9873	51.2238	55.7458
1157	ENSG00000084112	protein_coding	slingshot protein phosphatase 1 [Source:HGNC Symbol;Acc:HGNC:30579]	SSH1	82.9559	80.1222	77.6549	77.9075	76.4202	80.0928	78.6846	77.8202	85.0581	78.9575	75.8997	78.2158	77.8814	73.8058	78.3703	76.8955	73.2678	74.6748
1158	ENSG00000084207	protein_coding	glutathione S-transferase pi 1 [Source:HGNC Symbol;Acc:HGNC:4638]	GSTP1	250.086	250.887	242.524	261.097	245.496	257.438	235.925	257.265	257.194	248.464	258.408	259.632	232.647	232.965	221.612	233.3	231.654	242.619
1159	ENSG00000084234	protein_coding	amyloid beta precursor like protein 2 [Source:HGNC Symbol;Acc:HGNC:598]	APLP2	244.893	233.088	239.881	227.89	228.732	238.35	237.532	256.658	238.085	232.372	233.734	236.909	238.906	242.551	236.615	250.781	238.534	240.164
1160	ENSG00000084444	protein_coding	family with sequence similarity 234 member B [Source:HGNC Symbol;Acc:HGNC:29288]	FAM234B	30.9001	29.0578	30.0836	31.3594	31.4615	31.0808	30.8567	31.1551	33.2465	31.5012	33.5246	32.8222	33.623	31.4287	29.104	28.2841	33.5121	29.9369
1161	ENSG00000084453	protein_coding	solute carrier organic anion transporter family member 1A2 [Source:HGNC Symbol;Acc:HGNC:10956]	SLCO1A2	8.65459	8.64342	9.05318	8.25854	9.31837	9.25483	8.61416	7.62018	7.84554	9.54582	10.3256	10.1517	15.399	16.9944	16.551	15.0422	15.8004	16.0655
1162	ENSG00000084463	protein_coding	WW domain binding protein 11 [Source:HGNC Symbol;Acc:HGNC:16461]	WBP11	149.628	150.919	155.647	150.098	157.644	147.576	148.819	151.325	147.356	147.46	148.38	148.699	160.637	155.618	151.754	163.2	156.475	149.759
1163	ENSG00000084623	protein_coding	eukaryotic translation initiation factor 3 subunit I [Source:HGNC Symbol;Acc:HGNC:3272]	EIF3I	196.107	186.288	184.719	213.625	196.31	204.647	191.44	195.495	195.051	187.053	192.364	200.089	218.19	206.384	200.117	198.046	208.166	209.037
1164	ENSG00000084628	protein_coding	sodium/potassium transporting ATPase interacting 1 [Source:HGNC Symbol;Acc:HGNC:25743]	NKAIN1	98.2136	97.5796	90.588	103.723	85.9787	96.4816	87.5559	101.355	94.6903	91.8671	91.0528	93.9431	75.1672	68.141	69.6434	72.9461	74.7544	71.9228
1165	ENSG00000084636	protein_coding	collagen type XVI alpha 1 chain [Source:HGNC Symbol;Acc:HGNC:2193]	COL16A1	5.00043	6.2551	5.79179	5.37094	6.19623	4.28036	6.04277	6.06917	5.51518	5.77295	4.69344	5.68077	4.2098	5.33798	5.54567	4.12355	5.18184	4.94609
1166	ENSG00000084652	protein_coding	taxilin alpha [Source:HGNC Symbol;Acc:HGNC:30685]	TXLNA	124.818	125.671	125.676	129.018	122.484	129.722	125.87	133.319	133.064	122.414	129.003	125.398	119.924	113.296	115.384	120.57	114.17	113.091
1167	ENSG00000084676	protein_coding	nuclear receptor coactivator 1 [Source:HGNC Symbol;Acc:HGNC:7668]	NCOA1	97.6366	99.0581	97.6169	93.5006	94.9609	92.5483	95.8486	99.3321	99.6617	99.4128	95.6792	91.3131	93.7236	91.6172	92.5999	95.6547	87.9214	89.4015
1168	ENSG00000084693	protein_coding	ATP/GTP binding protein like 5 [Source:HGNC Symbol;Acc:HGNC:26147]	AGBL5	91.8028	89.1637	85.7522	95.1176	88.0441	93.6666	87.1702	90.0934	93.9912	88.5488	87.5663	93.0489	109.566	105.126	101.155	97.6874	106.185	108.182
1169	ENSG00000084710	protein_coding	EFR3 homolog B [Source:HGNC Symbol;Acc:HGNC:29155]	EFR3B	127.319	126.353	118.985	127.517	118.017	117.691	121.884	130.352	127.16	123.641	118.543	121.663	100.592	100.005	102.273	100.824	98.9222	101.19
1170	ENSG00000084731	protein_coding	kinesin family member 3C [Source:HGNC Symbol;Acc:HGNC:6321]	KIF3C	160.142	152.283	151.992	159.858	149.334	159.646	159.041	159.754	161.882	155.324	154.28	158.325	177.366	176.153	172.862	173.015	173.804	167.051
1171	ENSG00000084733	protein_coding	RAB10, member RAS oncogene family [Source:HGNC Symbol;Acc:HGNC:9759]	RAB10	188.542	193.681	186.068	188.734	189.586	191.266	198.19	191.246	205.149	189.098	197.527	181.522	178.252	186.394	182.749	179.287	173.719	174.824
1172	ENSG00000084754	protein_coding	hydroxyacyl-CoA dehydrogenase trifunctional multienzyme complex subunit alpha [Source:HGNC Symbol;Acc:HGNC:4801]	HADHA	277.78	269.879	277.893	274.669	285.939	285.858	287.61	282.284	284.459	284.42	293.541	276.727	326.814	326.325	315.674	315.19	324.417	319.079
1173	ENSG00000084764	protein_coding	microtubule associated protein RP/EB family member 3 [Source:HGNC Symbol;Acc:HGNC:6892]	MAPRE3	20.0658	19.6751	21.1428	24.4869	20.1738	21.7103	21.214	21.6467	20.3518	21.0917	20.7182	20.1983	19.1103	18.7919	20.721	20.5016	22.0865	21.3091
1174	ENSG00000084774	protein_coding	carbamoyl-phosphate synthetase 2, aspartate transcarbamylase, and dihydroorotase [Source:HGNC Symbol;Acc:HGNC:1424]	CAD	221.75	220.691	215.252	222.057	206.109	218.491	204.618	219.164	216.568	209.281	206.243	221.655	158.532	166.785	158.976	156.114	154.691	155.449
1175	ENSG00000085063	protein_coding	CD59 molecule (CD59 blood group) [Source:HGNC Symbol;Acc:HGNC:1689]	CD59	39.747	38.7816	36.4376	35.6908	37.6097	39.0631	37.5423	35.6058	37.8295	38.0014	36.3407	36.7672	41.378	40.1983	39.4216	40.1901	37.8019	37.7837
1176	ENSG00000085185	protein_coding	BCL6 corepressor like 1 [Source:HGNC Symbol;Acc:HGNC:25657]	BCORL1	61.4797	61.4706	65.2279	61.4482	55.7181	62.3544	62.5491	67.5026	62.0652	57.0022	58.9363	58.2805	65.0858	60.4608	66.2472	59.2397	57.2126	53.2913
1177	ENSG00000085224	protein_coding	ATRX chromatin remodeler [Source:HGNC Symbol;Acc:HGNC:886]	ATRX	542.675	556.534	543.135	548.702	573.656	496.907	519.678	463.347	438.651	534.111	545.378	540.304	478.699	528.841	619.052	567.191	597.483	578.097
1178	ENSG00000085231	protein_coding	adenylate kinase 6 [Source:HGNC Symbol;Acc:HGNC:49151]	AK6	15.6424	17.1731	15.0699	14.0337	15.4185	15.2705	15.2998	15.0381	16.7009	14.9551	14.8179	14.5701	12.6848	15.2514	13.1119	13.1837	12.4024	13.8342
1179	ENSG00000085274	protein_coding	myoneurin [Source:HGNC Symbol;Acc:HGNC:14955]	MYNN	37.8238	37.0757	35.5942	32.9187	36.3608	38.0219	40.178	36.9545	35.8099	37.3196	35.8043	36.3464	35.5618	35.8952	36.9712	36.1827	35.9756	35.4408
1180	ENSG00000085377	protein_coding	prolyl endopeptidase [Source:HGNC Symbol;Acc:HGNC:9358]	PREP	85.392	80.2928	81.085	77.1567	80.7912	87.8052	81.4488	85.7776	88.3983	81.594	82.8058	76.1644	84.5285	83.3379	79.9609	79.2186	74.1598	78.059
1181	ENSG00000085382	protein_coding	HECT domain and ankyrin repeat containing E3 ubiquitin protein ligase 1 [Source:HGNC Symbol;Acc:HGNC:21033]	HACE1	46.4784	43.9563	44.1975	42.852	45.391	41.1069	47.3136	44.1026	42.7233	46.3199	44.8559	42.8688	50.2407	52.5083	53.7372	49.3664	52.2856	51.4691
1182	ENSG00000085415	protein_coding	SEH1 like nucleoporin [Source:HGNC Symbol;Acc:HGNC:30379]	SEH1L	98.4059	96.5561	91.9376	94.4246	99.2838	96.443	94.2415	98.9275	93.2144	104.004	98.2941	92.2073	87.2427	90.5823	89.8915	101.637	89.5354	90.7403
1183	ENSG00000085433	protein_coding	WD repeat domain 47 [Source:HGNC Symbol;Acc:HGNC:29141]	WDR47	48.7222	47.1407	47.3465	45.6819	46.784	52.4055	51.0421	51.8577	49.3259	51.6383	50.7563	52.0737	53.1211	52.9985	49.6961	49.5987	48.6328	50.4278
1184	ENSG00000085449	protein_coding	WD repeat and FYVE domain containing 1 [Source:HGNC Symbol;Acc:HGNC:20451]	WDFY1	36.8622	36.0521	33.0076	35.0555	35.6403	35.3997	40.7565	37.8312	37.4411	34.4558	39.559	33.4008	36.2819	37.7471	36.2833	35.0211	37.4621	37.1886
1185	ENSG00000085491	protein_coding	solute carrier family 25 member 24 [Source:HGNC Symbol;Acc:HGNC:20662]	SLC25A24	75.1347	76.1985	73.9437	68.2629	72.4815	74.5785	75.7275	75.8646	74.1054	74.9574	75.4974	76.6378	87.0211	87.8588	90.1495	86.3041	88.1762	86.0173
1186	ENSG00000085511	protein_coding	mitogen-activated protein kinase kinase kinase 4 [Source:HGNC Symbol;Acc:HGNC:6856]	MAP3K4	59.6205	60.049	62.4163	56.7703	56.4866	58.4982	60.5563	58.1292	52.2777	59.5932	54.6451	57.8071	55.2814	54.0334	55.8007	58.4847	52.6679	54.7789
1187	ENSG00000085552	protein_coding	immunoglobulin superfamily member 9 [Source:HGNC Symbol;Acc:HGNC:18132]	IGSF9	58.2102	60.3902	61.9665	65.2021	62.2986	66.0563	59.9134	61.4335	56.9384	60.5932	58.6681	64.3295	63.3686	66.0711	64.0117	62.5502	63.2014	63.5554
1188	ENSG00000085563	protein_coding	ATP binding cassette subfamily B member 1 [Source:HGNC Symbol;Acc:HGNC:40]	ABCB1	156.808	154.615	155.816	149.462	159.037	160.803	163.026	152.471	144.249	156.87	158.504	153.433	154.323	155.074	155.322	148.099	145.729	153.924
1189	ENSG00000085644	protein_coding	zinc finger protein 213 [Source:HGNC Symbol;Acc:HGNC:13005]	ZNF213	28.2717	27.0675	23.8981	27.4322	25.1692	25.9906	25.5853	25.7603	27.1875	25.4555	23.132	28.509	23.4863	24.2388	26.8686	25.4382	23.5731	22.6107
1190	ENSG00000085662	protein_coding	aldo-keto reductase family 1 member B [Source:HGNC Symbol;Acc:HGNC:381]	AKR1B1	175.72	177.816	163.744	192.488	177.193	191.344	163.605	172.499	172.602	176.87	178.82	186.571	184.401	175.5	163.619	166.162	182.426	184.381
1191	ENSG00000085719	protein_coding	copine 3 [Source:HGNC Symbol;Acc:HGNC:2316]	CPNE3	116.228	117.937	116.792	111.057	119.938	119.156	124.327	112.077	120.713	119.414	126.79	119.191	119.536	123.645	123.037	116.331	118.758	120.789
1192	ENSG00000085721	protein_coding	RRN3 homolog, RNA polymerase I transcription factor [Source:HGNC Symbol;Acc:HGNC:30346]	RRN3	79.9428	87.2871	83.8966	77.33	86.8433	81.7895	83.4416	88.0704	86.0679	84.3668	85.4207	82.4764	81.3711	83.2834	81.4655	83.6906	85.0756	86.7983
1193	ENSG00000085733	protein_coding	cortactin [Source:HGNC Symbol;Acc:HGNC:3338]	CTTN	197.004	193.283	195.571	196.704	185.407	194.621	192.597	198.934	201.032	200.098	198.734	188.886	181.132	184.759	183.996	192.994	179.453	186.278
1194	ENSG00000085760	protein_coding	mitochondrial translational initiation factor 2 [Source:HGNC Symbol;Acc:HGNC:7441]	MTIF2	49.6197	49.5859	51.4513	44.8156	50.1463	45.85	54.0635	43.7655	43.1893	46.2745	44.0513	46.2352	46.5848	52.0725	49.4812	51.9799	52.3706	48.1965
1195	ENSG00000085788	protein_coding	DDHD domain containing 2 [Source:HGNC Symbol;Acc:HGNC:29106]	DDHD2	93.5978	91.552	99.4163	99.7956	97.0263	97.5227	102.599	90.5655	96.3215	94.9127	95.9474	90.2085	107.682	108.612	107.001	113.078	107.842	109.372
1196	ENSG00000085831	protein_coding	tetratricopeptide repeat domain 39A [Source:HGNC Symbol;Acc:HGNC:18657]	TTC39A	1.98735	2.04712	1.96808	1.3283	1.34492	1.88953	2.44282	1.75332	1.86429	2.04553	1.40803	1.57799	1.77255	2.50558	1.37567	1.56811	1.74144	1.71068
1197	ENSG00000085832	protein_coding	epidermal growth factor receptor pathway substrate 15 [Source:HGNC Symbol;Acc:HGNC:3419]	EPS15	103.727	105.199	104.196	99.9111	108.65	104.001	110.827	101.557	104.711	112.05	102.719	103.674	108.624	105.616	107.001	104.889	110.56	109
1198	ENSG00000085840	protein_coding	origin recognition complex subunit 1 [Source:HGNC Symbol;Acc:HGNC:8487]	ORC1	49.5556	48.8467	48.0775	48.2807	52.0195	51.4414	52.9707	51.5879	48.2384	51.2292	48.3425	52.6523	39.9378	39.3812	40.5393	41.8163	42.7714	43.5107
1199	ENSG00000085871	protein_coding	microsomal glutathione S-transferase 2 [Source:HGNC Symbol;Acc:HGNC:7063]	MGST2	3.39773	4.4923	3.31763	3.75388	4.37099	3.432	4.11423	2.69741	2.87411	4.13652	3.75476	4.10278	3.98824	4.30307	3.3532	3.94931	3.48288	4.12794
1200	ENSG00000085872	protein_coding	calcium homeostasis endoplasmic reticulum protein [Source:HGNC Symbol;Acc:HGNC:16930]	CHERP	135.012	134.997	136.416	137.796	125.654	136.123	127.091	135.612	142.074	122.459	127.595	131.867	118.595	122.338	118.824	121.906	120.032	122.351
1201	ENSG00000085978	protein_coding	autophagy related 16 like 1 [Source:HGNC Symbol;Acc:HGNC:21498]	ATG16L1	39.6188	40.3739	37.6185	37.5966	37.7538	41.0297	39.4709	38.3032	40.2375	39.9561	39.2908	38.0822	35.451	36.2765	34.8217	36.415	38.524	35.4036
1202	ENSG00000085982	protein_coding	ubiquitin specific peptidase 40 [Source:HGNC Symbol;Acc:HGNC:20069]	USP40	36.6057	36.7345	37.1124	40.1377	39.1948	38.2147	39.8566	40.7983	41.0143	43.0471	41.2353	40.7648	46.5294	42.7583	46.6439	44.1394	43.2386	44.8495
1203	ENSG00000085998	protein_coding	protein O-linked mannose N-acetylglucosaminyltransferase 1 (beta 1,2-) [Source:HGNC Symbol;Acc:HGNC:19139]	POMGNT1	67.4417	67.3845	68.0394	75.5397	71.3287	73.5759	67.5633	72.6952	74.7269	71.6845	69.9994	72.2194	71.2897	71.2457	73.3835	72.2492	74.7119	75.902
1204	ENSG00000085999	protein_coding	RAD54 like [Source:HGNC Symbol;Acc:HGNC:9826]	RAD54L	56.8639	60.8451	60.6732	60.8129	58.3118	57.6499	59.3348	57.4548	56.6277	58.5931	57.5953	58.9117	45.9755	46.6801	49.2662	49.1922	47.7409	46.4858
1205	ENSG00000086015	protein_coding	microtubule associated serine/threonine kinase 2 [Source:HGNC Symbol;Acc:HGNC:19035]	MAST2	101.74	101.333	98.3479	100.951	93.9042	99.3737	102.084	102.906	99.584	100.595	96.3497	104.095	90.677	94.8853	95.0503	98.2682	93.2731	96.0211
1206	ENSG00000086061	protein_coding	DnaJ heat shock protein family (Hsp40) member A1 [Source:HGNC Symbol;Acc:HGNC:5229]	DNAJA1	495.235	480.392	476.895	440.359	462.988	460.852	492.614	494.84	473.451	464.154	466.864	446.835	290.31	278.501	279.132	273.142	268.309	269.506
1207	ENSG00000086062	protein_coding	beta-1,4-galactosyltransferase 1 [Source:HGNC Symbol;Acc:HGNC:924]	B4GALT1	18.976	18.7084	19.8495	20.04	17.532	18.7025	18.4497	19.9608	19.8081	18.9553	17.4998	20.3035	16.0083	14.3254	14.0146	15.9134	14.696	15.6192
1208	ENSG00000086065	protein_coding	charged multivesicular body protein 5 [Source:HGNC Symbol;Acc:HGNC:26942]	CHMP5	72.5704	70.967	71.6944	67.3389	74.3068	70.9922	74.5703	76.9436	76.8242	73.6846	74.2905	76.217	77.549	74.4594	77.4245	78.4055	81.083	78.1333
1209	ENSG00000086102	protein_coding	nuclear transcription factor, X-box binding 1 [Source:HGNC Symbol;Acc:HGNC:7803]	NFX1	77.9555	76.4829	78.6109	74.0959	77.2368	77.8562	76.6275	81.2594	76.4358	76.7302	73.2177	74.2182	73.1177	75.9845	74.3722	76.1404	75.3915	74.8236
1210	ENSG00000086189	protein_coding	DIMT1 rRNA methyltransferase and ribosome maturation factor [Source:HGNC Symbol;Acc:HGNC:30217]	DIMT1	29.4897	28.7735	30.927	29.5113	29.0118	30.1939	30.2781	30.5482	28.1197	29.6375	31.379	28.246	24.8157	24.0209	23.9883	23.6959	24.7624	25.623
1211	ENSG00000086200	protein_coding	importin 11 [Source:HGNC Symbol;Acc:HGNC:20628]	IPO11	49.4273	51.3487	45.772	49.7823	50.4345	49.5904	51.2993	49.0928	50.8795	52.3656	51.0915	49.0229	48.2466	51.7457	47.0308	50.1214	50.8415	48.2709
1212	ENSG00000086232	protein_coding	eukaryotic translation initiation factor 2 alpha kinase 1 [Source:HGNC Symbol;Acc:HGNC:24921]	EIF2AK1	377.148	360.919	373.205	360.719	360.871	381.106	371.437	367.657	367.109	374.469	371.453	367.304	400.929	400.457	390.605	411.948	397.515	398.216
1213	ENSG00000086289	protein_coding	ependymin related 1 [Source:HGNC Symbol;Acc:HGNC:17572]	EPDR1	35.3877	35.0286	35.2006	34.8245	37.6577	36.4023	38.0566	36.1453	38.2179	38.5015	37.4805	35.3996	27.6961	27.9972	27.0835	29.3875	27.7356	28.2262
1214	ENSG00000086300	protein_coding	sorting nexin 10 [Source:HGNC Symbol;Acc:HGNC:14974]	SNX10	4.48757	4.6629	4.44224	4.56241	5.09148	4.47317	5.9142	4.11355	4.7384	5.13656	6.43672	4.47098	5.70539	5.50139	5.8466	5.34319	6.03132	4.94609
1215	ENSG00000086475	protein_coding	selenophosphate synthetase 1 [Source:HGNC Symbol;Acc:HGNC:19685]	SEPHS1	133.665	136.02	129.781	130.346	130.505	137.781	137.634	139.186	139.122	132.596	137.049	129.764	133.44	125.116	119.812	129.63	129.631	131.164
1216	ENSG00000086504	protein_coding	mitochondrial ribosomal protein L28 [Source:HGNC Symbol;Acc:HGNC:14484]	MRPL28	46.5425	46.9701	46.3905	49.2048	47.6966	47.4696	42.7494	48.958	54.0643	46.8654	45.9958	49.6541	45.0338	43.5209	39.3356	43.2101	40.8176	41.3166
1217	ENSG00000086544	protein_coding	inositol-trisphosphate 3-kinase C [Source:HGNC Symbol;Acc:HGNC:14897]	ITPKC	8.01351	8.01791	8.94072	9.24033	8.74197	9.37051	8.74273	8.36197	9.24376	9.13671	9.45394	8.88935	8.80736	8.71507	7.73815	8.82788	8.66471	8.96246
1218	ENSG00000086589	protein_coding	RNA binding motif protein 22 [Source:HGNC Symbol;Acc:HGNC:25503]	RBM22	68.2751	67.8963	64.5531	63.0075	65.9971	68.8713	66.149	64.4006	68.3572	66.2298	67.0492	67.275	56.5554	58.9901	58.9819	58.8912	57.2975	59.3531
1219	ENSG00000086598	protein_coding	transmembrane p24 trafficking protein 2 [Source:HGNC Symbol;Acc:HGNC:16996]	TMED2	228.417	222.909	221.044	205.655	225.178	221.46	225.447	226.313	232.881	229.145	224.011	199.511	188.167	178.005	180.858	190.032	179.623	181.667
1220	ENSG00000086619	protein_coding	endoplasmic reticulum oxidoreductase 1 beta [Source:HGNC Symbol;Acc:HGNC:14355]	ERO1B	7.69297	9.32579	7.92856	8.14304	8.79001	7.63523	9.51415	9.17119	8.62233	7.54574	8.51525	8.41596	5.65	6.5363	6.96434	4.76241	6.24369	6.17332
1221	ENSG00000086666	protein_coding	zinc finger AN1-type containing 6 [Source:HGNC Symbol;Acc:HGNC:30164]	ZFAND6	50.0684	52.3723	54.6002	53.6517	52.5959	51.5185	55.1563	51.3182	50.6465	51.3201	51.0915	52.1263	57.8294	56.9203	60.2716	56.9747	55.6411	56.8614
1222	ENSG00000086712	protein_coding	taxilin gamma [Source:HGNC Symbol;Acc:HGNC:18578]	TXLNG	72.8909	70.0572	73.9437	64.278	74.4028	66.2877	67.1133	67.5026	65.8715	65.5934	70.2005	66.1178	67.3015	66.6703	63.3669	63.6536	64.3482	62.1794
1223	ENSG00000086717	protein_coding	protein phosphatase with EF-hand domain 1 [Source:HGNC Symbol;Acc:HGNC:9243]	PPEF1	29.2333	29.399	27.8343	30.2621	31.6056	30.1553	32.2067	28.7948	27.1098	28.3647	30.1051	30.4552	32.6814	29.0865	29.8779	31.7687	28.8399	31.5732
1224	ENSG00000086758	protein_coding	HECT, UBA and WWE domain containing E3 ubiquitin protein ligase 1 [Source:HGNC Symbol;Acc:HGNC:30892]	HUWE1	623.067	617.492	616.066	618.467	609.969	630.794	613.598	625.731	613.506	618.66	619.803	635.878	679.939	670.461	659.763	644.784	641.274	631.203
1225	ENSG00000086827	protein_coding	zw10 kinetochore protein [Source:HGNC Symbol;Acc:HGNC:13194]	ZW10	38.529	39.9758	38.6307	34.6512	39.2428	38.1376	39.4709	39.2473	37.4411	37.7742	38.4862	35.3996	36.0603	33.8254	35.7245	32.3495	34.2341	33.6557
1226	ENSG00000086848	protein_coding	ALG9 alpha-1,2-mannosyltransferase [Source:HGNC Symbol;Acc:HGNC:15672]	ALG9	20.7069	20.8124	19.3997	20.5597	19.9336	18.394	23.7854	20.4329	19.7304	20.2735	18.6397	19.6197	20.2181	20.9706	19.1734	21.0824	23.1909	21.4578
1227	ENSG00000086991	protein_coding	NADPH oxidase 4 [Source:HGNC Symbol;Acc:HGNC:7891]	NOX4	3.46184	5.68646	5.11702	5.02443	5.23558	4.85878	5.84991	3.77637	3.96161	5.8184	5.29689	5.62817	5.09608	4.57541	5.33073	5.51742	5.35174	5.65267
1228	ENSG00000087008	protein_coding	acyl-CoA oxidase 3, pristanoyl [Source:HGNC Symbol;Acc:HGNC:121]	ACOX3	14.6166	17.7986	12.8769	14.7845	14.5539	14.7692	14.7212	17.1285	14.2929	13.0914	13.2087	15.3591	13.0726	13.236	11.0484	12.2545	13.5068	13.5367
1229	ENSG00000087053	protein_coding	myotubularin related protein 2 [Source:HGNC Symbol;Acc:HGNC:7450]	MTMR2	122.126	119.643	119.716	115.1	122.147	116.302	121.498	118.551	124.208	122.368	125.985	118.718	119.869	121.848	116.072	120.396	116.379	118.52
1230	ENSG00000087074	protein_coding	protein phosphatase 1 regulatory subunit 15A [Source:HGNC Symbol;Acc:HGNC:14375]	PPP1R15A	13.9756	14.7279	14.9012	15.6508	14.0256	15.8875	16.5855	16.2519	16.0795	15.546	14.7508	14.9383	16.2299	17.3212	18.5286	20.6758	18.901	18.4084
1231	ENSG00000087076	protein_coding	hydroxysteroid 17-beta dehydrogenase 14 [Source:HGNC Symbol;Acc:HGNC:23238]	HSD17B14	4.03881	3.07069	3.76747	3.75388	3.2182	3.70193	4.2428	2.69741	3.2625	3.40922	3.28541	3.26118	3.10196	3.75837	3.52516	4.2397	4.37483	3.49573
1232	ENSG00000087085	protein_coding	acetylcholinesterase (Cartwright blood group) [Source:HGNC Symbol;Acc:HGNC:108]	ACHE	3.39773	3.58247	3.43009	4.2159	4.13082	5.05159	4.04994	3.23689	4.35	4.3638	3.55361	5.10217	3.98824	2.66899	4.51392	3.48469	4.54473	3.83043
1233	ENSG00000087086	protein_coding	ferritin light chain [Source:HGNC Symbol;Acc:HGNC:3999]	FTL	205.082	210.797	199.17	222.923	210.336	218.761	205.583	216.669	208.567	208.69	214.557	218.867	230.708	211.34	213.057	230.686	228.723	226.479
1234	ENSG00000087087	protein_coding	serrate, RNA effector molecule [Source:HGNC Symbol;Acc:HGNC:24101]	SRRT	222.968	218.985	234.877	214.376	213.074	205.534	226.797	221.862	223.326	208.826	196.052	210.557	175.205	178.387	179.74	190.09	169.981	177.985
1235	ENSG00000087088	protein_coding	BCL2 associated X, apoptosis regulator [Source:HGNC Symbol;Acc:HGNC:959]	BAX	29.4897	29.9108	28.7902	34.4202	31.0292	33.8958	30.6638	31.6945	30.6054	31.5921	34.7315	33.8216	31.7951	31.0474	29.5339	30.2587	31.5582	30.6434
1236	ENSG00000087095	protein_coding	nemo like kinase [Source:HGNC Symbol;Acc:HGNC:29858]	NLK	21.8609	23.2007	26.6535	21.9458	21.5187	21.0933	21.5354	23.8046	22.5268	21.9554	20.7853	22.8283	18.1686	20.5894	20.0332	20.3274	20.2177	20.6769
1237	ENSG00000087111	protein_coding	phosphatidylinositol glycan anchor biosynthesis class S [Source:HGNC Symbol;Acc:HGNC:14937]	PIGS	55.5176	53.3958	55.4999	55.1532	51.3951	56.8401	55.7349	57.792	52.8215	53.7748	53.9746	52.8627	48.0804	49.8393	48.7503	52.6188	49.6097	51.4319
1238	ENSG00000087152	protein_coding	ataxin 7 like 3 [Source:HGNC Symbol;Acc:HGNC:25416]	ATXN7L3	93.9184	91.7226	84.1215	96.9657	88.8127	97.7541	93.0201	93.9373	94.2242	91.8671	86.9628	95.7315	94.4437	90.6367	85.4206	87.4076	93.9527	89.4015
1239	ENSG00000087157	protein_coding	phosphatidylglycerophosphate synthase 1 [Source:HGNC Symbol;Acc:HGNC:30029]	PGS1	61.8002	58.0587	59.661	61.6214	59.6568	59.8864	56.1849	58.1966	59.3465	57.7295	52.5666	60.9631	57.2755	52.8351	54.296	56.1035	56.4056	59.0184
1240	ENSG00000087191	protein_coding	proteasome 26S subunit, ATPase 5 [Source:HGNC Symbol;Acc:HGNC:9552]	PSMC5	193.478	192.089	201.475	206.926	194.389	203.336	197.547	193.539	198.391	196.553	199.27	193.041	196.753	182.145	181.933	190.903	186.971	186.538
1241	ENSG00000087206	protein_coding	ubiquitin interaction motif containing 1 [Source:HGNC Symbol;Acc:HGNC:30298]	UIMC1	29.1692	29.5696	32.1641	30.8396	31.5095	31.1194	31.3067	31.2899	28.1197	31.8648	33.8599	29.5084	34.9525	35.5139	37.2721	37.5766	33.8518	33.2466
1242	ENSG00000087245	protein_coding	matrix metallopeptidase 2 [Source:HGNC Symbol;Acc:HGNC:7166]	MMP2	316.373	316.565	285.484	312.265	298.428	303.867	293.846	314.585	308.307	292.284	306.348	293.191	231.152	231.821	210.005	227.086	220.78	226.33
1243	ENSG00000087253	protein_coding	lysophosphatidylcholine acyltransferase 2 [Source:HGNC Symbol;Acc:HGNC:26032]	LPCAT2	33.0157	34.4031	30.7021	31.9946	31.7497	31.6592	32.5281	28.9297	31.6152	33.1376	35.7372	30.876	29.9118	29.5768	28.5022	27.8775	27.3108	31.3128
1244	ENSG00000087258	protein_coding	G protein subunit alpha o1 [Source:HGNC Symbol;Acc:HGNC:4389]	GNAO1	152.641	152.795	149.855	150.675	146.836	153.09	143.355	154.224	153.881	147.369	144.223	153.802	142.026	146.413	143.027	140.898	143.775	133.805
1245	ENSG00000087263	protein_coding	2-oxoglutarate and iron dependent oxygenase domain containing 1 [Source:HGNC Symbol;Acc:HGNC:25585]	OGFOD1	73.7243	69.5454	69.9513	67.5699	71.4248	70.6066	73.8632	67.9073	70.8429	70.5936	68.189	71.6934	61.5407	62.9119	60.6585	61.2724	62.267	61.8447
1246	ENSG00000087266	protein_coding	SH3 domain binding protein 2 [Source:HGNC Symbol;Acc:HGNC:10825]	SH3BP2	66.4801	65.906	74.1686	74.0381	69.6956	70.4909	64.1562	72.4929	67.7358	70.5481	70.1335	73.5344	65.6951	70.7555	70.2022	76.4889	74.627	76.8317
1247	ENSG00000087269	protein_coding	NOP14 nucleolar protein [Source:HGNC Symbol;Acc:HGNC:16821]	NOP14	76.9938	71.82	73.9437	70.342	70.32	73.8072	76.306	73.6393	75.2706	74.3664	69.8653	68.9582	64.3657	60.2429	61.3033	69.7518	62.8192	60.5059
1248	ENSG00000087274	protein_coding	adducin 1 [Source:HGNC Symbol;Acc:HGNC:243]	ADD1	262.715	255.094	247.866	250.24	250.827	248.184	250.903	257.872	263.175	250.555	250.697	257.37	263.556	259.437	250.716	259.842	261.046	256.267
1249	ENSG00000087299	protein_coding	L-2-hydroxyglutarate dehydrogenase [Source:HGNC Symbol;Acc:HGNC:20499]	L2HGDH	27.9511	26.5558	29.1839	25.7574	27.1385	28.1501	28.4782	29.2669	28.5857	28.2738	25.0094	24.6167	25.4804	25.7639	24.6761	26.7159	24.635	24.9908
1250	ENSG00000087301	protein_coding	thioredoxin domain containing 16 [Source:HGNC Symbol;Acc:HGNC:19965]	TXNDC16	24.4893	22.5184	26.6535	27.49	24.929	24.1011	24.8782	22.7257	22.5268	25.3646	28.8312	25.2479	34.2878	34.5879	34.5207	37.2862	35.5083	34.8829
1251	ENSG00000087302	protein_coding	RNA transcription, translation and transport factor [Source:HGNC Symbol;Acc:HGNC:23169]	RTRAF	101.163	105.484	108.694	104.242	106.201	103.191	104.398	106.683	104.711	100.913	108.083	100.781	105.024	103.764	105.454	102.74	104.274	105.727
1252	ENSG00000087338	protein_coding	germ cell-less 1, spermatogenesis associated [Source:HGNC Symbol;Acc:HGNC:23843]	GMCL1	73.4038	75.6868	78.7795	73.5761	76.3241	74.1929	73.9918	79.641	79.6206	76.0938	72.9495	72.6928	73.5054	73.6968	74.1143	71.6104	71.8237	71.365
1253	ENSG00000087365	protein_coding	splicing factor 3b subunit 2 [Source:HGNC Symbol;Acc:HGNC:10769]	SF3B2	369.519	373.202	368.256	365.455	362.888	372.391	375.873	379.323	380.936	358.468	371.922	366.357	380.323	369.083	363.521	377.276	363.153	366.717
1254	ENSG00000087448	protein_coding	kelch like family member 42 [Source:HGNC Symbol;Acc:HGNC:29252]	KLHL42	135.973	143.412	141.027	132.656	138.094	132.922	144.448	146.065	144.094	142.733	139.865	141.23	123.414	120.867	119.64	113.31	118.503	120.38
1255	ENSG00000087460	protein_coding	GNAS complex locus [Source:HGNC Symbol;Acc:HGNC:4392]	GNAS	1794.83	1786.51	1723.65	1832.76	1745.08	1860.95	1725.66	1789.26	1808.2	1720.43	1764.4	1785.92	1815.7	1799.83	1726.81	1739.91	1785.78	1760.81
1256	ENSG00000087470	protein_coding	dynamin 1 like [Source:HGNC Symbol;Acc:HGNC:2973]	DNM1L	183.157	187.084	191.185	187.174	189.97	182.012	186.169	186.323	175.321	186.28	187.671	179.944	190.106	186.503	187.951	184.572	181.449	187.319
1257	ENSG00000087495	protein_coding	phosphatase and actin regulator 3 [Source:HGNC Symbol;Acc:HGNC:15833]	PHACTR3	29.7462	32.4697	31.6018	33.2652	31.7977	34.5514	30.5996	34.6617	32.392	34.274	33.2564	34.032	44.3691	45.2639	43.8495	46.8691	43.4935	42.4322
1258	ENSG00000087502	protein_coding	ERGIC and golgi 2 [Source:HGNC Symbol;Acc:HGNC:30208]	ERGIC2	37.4391	34.3462	35.6504	32.3412	33.671	31.505	32.8495	30.0761	27.9643	34.0467	32.9882	33.6112	27.4191	29.9036	30.6087	32.1753	29.6044	31.0153
1259	ENSG00000087586	protein_coding	aurora kinase A [Source:HGNC Symbol;Acc:HGNC:11393]	AURKA	41.7985	43.2171	41.5547	38.9826	39.9633	41.2225	42.7494	40.3263	41.9465	40.0924	42.4421	38.8712	57.3863	52.0181	52.6624	59.0655	52.4555	54.7417
1260	ENSG00000087842	protein_coding	pirin [Source:HGNC Symbol;Acc:HGNC:30048]	PIR	17.6938	19.334	19.9058	18.3652	22.5754	20.6691	22.9497	21.5118	19.342	20.1371	22.3274	21.8815	29.4132	25.6005	27.8144	26.1352	28.2453	29.2303
1261	ENSG00000087884	protein_coding	adipogenesis associated Mth938 domain containing [Source:HGNC Symbol;Acc:HGNC:30205]	AAMDC	7.116	6.14137	6.91641	6.00621	6.91673	5.59146	7.39275	6.33891	6.21429	6.45479	6.63787	7.88996	8.58579	8.44272	8.12506	9.81521	9.38677	8.5162
1262	ENSG00000087903	protein_coding	regulatory factor X2 [Source:HGNC Symbol;Acc:HGNC:9983]	RFX2	13.7832	15.5809	16.082	15.5353	15.3225	14.8077	15.1712	17.1285	15.225	14.6369	14.5497	14.3597	13.9588	15.6327	15.0464	14.9842	15.7579	15.6936
1263	ENSG00000087995	protein_coding	methyltransferase like 2A [Source:HGNC Symbol;Acc:HGNC:25755]	METTL2A	69.4932	71.2513	70.9072	66.9346	68.1586	70.3752	68.399	73.9764	71.309	68.1844	63.0263	66.8542	72.7299	67.7052	66.6771	67.4868	68.6381	67.6461
1264	ENSG00000088035	protein_coding	ALG6 alpha-1,3-glucosyltransferase [Source:HGNC Symbol;Acc:HGNC:23157]	ALG6	18.399	16.5476	18.5562	17.7299	16.7635	16.8515	19.2854	16.5216	16.3902	18.9098	17.768	17.2001	17.7809	16.722	16.1641	15.9134	15.4606	17.144
1265	ENSG00000088038	protein_coding	CCR4-NOT transcription complex subunit 3 [Source:HGNC Symbol;Acc:HGNC:7879]	CNOT3	62.1207	63.1765	64.1595	65.9528	58.8402	62.4701	60.942	66.3562	62.7643	59.6841	58.8692	63.4879	60.599	55.9943	59.2398	62.5502	57.0852	58.8696
1266	ENSG00000088179	protein_coding	protein tyrosine phosphatase non-receptor type 4 [Source:HGNC Symbol;Acc:HGNC:9656]	PTPN4	78.7247	78.9849	79.3981	74.9044	83.1928	70.9537	74.7632	72.0208	77.9894	74.0028	76.302	74.902	73.3392	84.2094	83.572	77.1859	80.8282	79.844
1267	ENSG00000088205	protein_coding	DEAD-box helicase 18 [Source:HGNC Symbol;Acc:HGNC:2741]	DDX18	228.738	232.747	226.779	225.753	230.125	227.322	233.932	211.881	214.548	230.554	228.973	225.811	218.854	225.448	220.58	216.631	227.916	226.776
1268	ENSG00000088247	protein_coding	KH-type splicing regulatory protein [Source:HGNC Symbol;Acc:HGNC:6316]	KHSRP	379.712	374.112	366.851	382.723	362.6	379.409	356.331	380.537	385.907	361.786	360.39	375.457	364.813	363.473	347.357	372.165	366.806	355.189
1269	ENSG00000088256	protein_coding	G protein subunit alpha 11 [Source:HGNC Symbol;Acc:HGNC:4379]	GNA11	97.5725	95.6462	92.6124	96.6769	87.5158	90.813	86.8487	98.3205	98.6519	88.9579	85.1525	92.1021	76.4966	77.9454	73.5554	76.1985	68.2134	73.2244
1270	ENSG00000088280	protein_coding	ArfGAP with SH3 domain, ankyrin repeat and PH domain 3 [Source:HGNC Symbol;Acc:HGNC:14987]	ASAP3	27.6306	24.9635	26.8784	26.6237	27.3307	29.8468	28.1567	27.3113	29.3625	27.8192	26.1492	27.7727	32.2382	29.4678	31.7264	32.8142	30.8787	30.1228
1271	ENSG00000088298	protein_coding	ER degradation enhancing alpha-mannosidase like protein 2 [Source:HGNC Symbol;Acc:HGNC:15877]	EDEM2	13.1422	12.9083	12.3146	12.0124	11.1916	13.4966	11.6998	12.4755	12.1955	11.6368	10.0574	11.6245	10.3583	11.5475	10.1456	9.11827	10.7884	11.045
1272	ENSG00000088305	protein_coding	DNA methyltransferase 3 beta [Source:HGNC Symbol;Acc:HGNC:2979]	DNMT3B	23.6559	24.338	24.2355	21.5993	22.8156	23.8697	22.3711	22.7931	25.3232	22.5463	24.9423	22.8283	27.7515	27.8338	26.5247	27.529	24.8049	24.0239
1273	ENSG00000088325	protein_coding	TPX2 microtubule nucleation factor [Source:HGNC Symbol;Acc:HGNC:1249]	TPX2	233.866	239.57	241.062	233.896	235.361	243.98	253.925	248.431	246.552	240.236	241.511	236.699	294.853	288.959	283.861	289.636	274.51	277.688
1274	ENSG00000088356	protein_coding	p53 and DNA damage regulated 1 [Source:HGNC Symbol;Acc:HGNC:16119]	PDRG1	15.0654	14.1593	14.7887	16.3438	15.7067	15.3476	16.264	15.1729	15.6911	17.2279	15.5554	17.0423	13.9588	14.8156	13.7997	14.5776	13.6767	16.1027
1275	ENSG00000088367	protein_coding	erythrocyte membrane protein band 4.1 like 1 [Source:HGNC Symbol;Acc:HGNC:3378]	EPB41L1	100.586	97.5796	100.147	102.106	96.4019	100.531	102.341	105.536	103.934	101.322	97.3555	100.781	85.1932	87.7499	85.2056	88.2788	84.2261	83.1166
1276	ENSG00000088387	protein_coding	dedicator of cytokinesis 9 [Source:HGNC Symbol;Acc:HGNC:14132]	DOCK9	20.0658	20.8693	21.4802	21.3105	19.9336	19.7436	20.0569	21.1747	19.8081	18.5916	19.9807	20.3561	17.4485	18.7374	18.8295	18.6431	19.1983	17.4415
1277	ENSG00000088448	protein_coding	ankyrin repeat domain 10 [Source:HGNC Symbol;Acc:HGNC:20265]	ANKRD10	131.806	131.641	129.05	128.96	128.488	119.464	127.927	129.745	129.723	132.778	118.744	126.239	126.571	131.107	135.16	130.211	129.121	130.941
1278	ENSG00000088451	protein_coding	TDP-glucose 4,6-dehydratase [Source:HGNC Symbol;Acc:HGNC:20324]	TGDS	12.3729	12.3396	13.2705	11.0884	12.0082	11.9156	11.2498	12.3406	10.7973	13.2732	12.203	12.1505	11.8539	14.2165	10.9194	11.2672	11.2132	12.4582
1279	ENSG00000088543	protein_coding	chromosome 3 open reading frame 18 [Source:HGNC Symbol;Acc:HGNC:24837]	C3orf18	15.7706	16.1495	15.8571	18.3652	15.1784	17.8927	15.6212	17.196	17.0116	16.0461	18.1703	17.2001	18.3902	19.4455	18.3996	16.2038	16.5224	17.8505
1280	ENSG00000088682	protein_coding	coenzyme Q9 [Source:HGNC Symbol;Acc:HGNC:25302]	COQ9	40.6445	37.9855	40.7674	41.1772	39.6751	41.531	40.1137	41.2029	41.6358	40.9561	38.6874	41.0804	42.0427	38.4008	41.2701	44.0232	38.1417	39.3084
1281	ENSG00000088727	protein_coding	kinesin family member 9 [Source:HGNC Symbol;Acc:HGNC:16666]	KIF9	8.20584	9.04147	9.33434	8.66281	7.49312	8.05941	8.54988	9.17119	7.61251	8.45486	8.78345	9.46795	7.58873	8.33379	7.65217	6.96938	7.73028	6.76833
1282	ENSG00000088756	protein_coding	Rho GTPase activating protein 28 [Source:HGNC Symbol;Acc:HGNC:25509]	ARHGAP28	9.488	11.3729	10.4027	10.1644	11.8641	12.2626	9.06415	9.44093	9.70983	11.5459	11.0631	11.8875	12.0755	11.6019	11.9511	10.9768	11.5105	13.202
1283	ENSG00000088766	protein_coding	cardiolipin synthase 1 [Source:HGNC Symbol;Acc:HGNC:16148]	CRLS1	3.26951	3.46874	3.76747	4.38916	3.5064	2.66076	3.08567	2.42767	3.96161	2.68192	3.35246	2.89298	2.49265	2.28771	2.45041	3.94931	2.54845	3.12385
1284	ENSG00000088808	protein_coding	protein phosphatase 1 regulatory subunit 13B [Source:HGNC Symbol;Acc:HGNC:14950]	PPP1R13B	19.2324	19.7889	20.9741	20.5597	17.7721	19.0881	17.4855	20.3654	19.6527	19.728	18.5056	19.1989	13.9588	14.7612	16.5081	15.1003	16.4799	15.6192
1285	ENSG00000088812	protein_coding	attractin [Source:HGNC Symbol;Acc:HGNC:885]	ATRN	121.934	118.108	117.298	114.58	119.265	120.351	127.22	124.351	123.82	115.186	120.085	119.401	114.773	115.366	111.644	109.013	116.591	116.177
1286	ENSG00000088826	protein_coding	spermine oxidase [Source:HGNC Symbol;Acc:HGNC:15862]	SMOX	4.35935	3.58247	4.94832	3.86939	4.80328	3.9333	4.2428	5.59712	4.97143	3.81833	3.68771	5.15477	5.26226	4.73882	5.0298	4.64625	5.60658	5.09484
1287	ENSG00000088832	protein_coding	FKBP prolyl isomerase 1A [Source:HGNC Symbol;Acc:HGNC:3711]	FKBP1A	105.971	105.313	101.272	110.249	100.725	106.469	105.62	106.345	105.798	103.186	103.591	101.202	91.7848	92.87	89.8485	91.415	97.1382	96.6161
1288	ENSG00000088833	protein_coding	NSFL1 cofactor [Source:HGNC Symbol;Acc:HGNC:15912]	NSFL1C	64.1081	63.5746	63.5972	64.5668	62.5868	64.8609	64.2848	62.3101	63.3858	60.275	63.9649	66.223	60.2667	59.3714	57.7352	62.8986	59.039	59.8737
1289	ENSG00000088836	protein_coding	solute carrier family 4 member 11 [Source:HGNC Symbol;Acc:HGNC:16438]	SLC4A11	3.20541	3.12755	4.27355	2.94535	3.60246	3.16207	3.92137	4.24842	2.95179	3.45468	3.8218	4.57618	2.38186	3.10474	3.52516	3.02006	2.93071	3.04947
1290	ENSG00000088854	protein_coding	chromosome 20 open reading frame 194 [Source:HGNC Symbol;Acc:HGNC:17721]	C20orf194	41.3497	39.4072	42.1732	42.1012	38.042	42.4951	38.5066	41.4052	41.7134	43.7744	41.1682	39.5024	54.6167	55.8854	54.0811	51.8057	53.1776	52.8079
1291	ENSG00000088876	protein_coding	zinc finger protein 343 [Source:HGNC Symbol;Acc:HGNC:16017]	ZNF343	33.2721	31.0481	32.6702	31.3594	28.8197	30.6566	35.3566	31.4248	28.7411	27.6829	25.7469	28.4564	30.2995	29.0865	31.4255	28.226	27.2684	29.8625
1292	ENSG00000088881	protein_coding	EBF family member 4 [Source:HGNC Symbol;Acc:HGNC:29278]	EBF4	42.8883	48.9604	44.3662	52.6121	46.784	50.5545	43.7136	46.3954	49.7143	46.1381	42.4421	49.3385	44.4245	51.0376	49.9111	45.6494	46.8489	47.0808
1293	ENSG00000088882	protein_coding	carboxypeptidase X, M14 family member 1 [Source:HGNC Symbol;Acc:HGNC:15771]	CPXM1	116.036	119.814	129.893	128.267	126.086	129.722	116.677	126.171	121.489	122.277	128.064	130.763	121.253	125.551	124.24	119.931	128.059	123.503
1294	ENSG00000088888	protein_coding	mitochondrial antiviral signaling protein [Source:HGNC Symbol;Acc:HGNC:29233]	MAVS	128.537	125.784	122.415	122.55	121.235	124.285	122.912	125.025	128.714	128.187	118.945	133.288	126.903	127.73	123.338	132.418	126.233	128.003
1295	ENSG00000088899	protein_coding	leucine zipper tumor suppressor family member 3 [Source:HGNC Symbol;Acc:HGNC:30139]	LZTS3	21.5403	20.0163	22.9422	23.9671	25.8417	22.6743	21.5997	21.7141	21.5947	22.5009	20.2489	22.9335	27.5299	24.6745	28.0293	27.471	27.5657	31.0153
1296	ENSG00000088930	protein_coding	5'-3' exoribonuclease 2 [Source:HGNC Symbol;Acc:HGNC:12836]	XRN2	235.533	233.031	234.708	226.677	244.727	240.78	243.318	225.908	234.356	235.327	237.488	234.121	268.929	257.694	264.559	268.902	270.008	264.448
1297	ENSG00000088986	protein_coding	dynein light chain LC8-type 1 [Source:HGNC Symbol;Acc:HGNC:15476]	DYNLL1	165.527	167.751	165.769	168.232	167.683	174.184	169.005	172.027	169.572	161.188	163.6	160.429	138.148	127.839	133.182	132.128	128.951	125.586
1298	ENSG00000089006	protein_coding	sorting nexin 5 [Source:HGNC Symbol;Acc:HGNC:14969]	SNX5	72.6986	76.4829	76.699	76.7525	82.7605	75.3883	77.7846	74.9205	72.0858	81.7304	77.5759	76.743	72.1206	72.4985	71.9218	84.2133	78.9169	79.6953
1299	ENSG00000089009	protein_coding	ribosomal protein L6 [Source:HGNC Symbol;Acc:HGNC:10362]	RPL6	667.942	666.396	670.891	651.674	673.756	680.423	685.533	683.456	658.016	660.025	684.841	662.809	734.666	713.928	712.469	721.272	753.958	726.48
1300	ENSG00000089022	protein_coding	MAPK activated protein kinase 5 [Source:HGNC Symbol;Acc:HGNC:6889]	MAPKAPK5	82.8918	82.4536	81.816	83.3362	81.4637	84.6817	84.7916	86.8566	80.7081	86.0942	79.3863	81.0036	83.0883	83.1745	83.0561	90.2534	81.5927	83.1538
1301	ENSG00000089041	protein_coding	purinergic receptor P2X 7 [Source:HGNC Symbol;Acc:HGNC:8537]	P2RX7	10.3855	9.61011	10.5152	10.1066	10.6633	11.1829	11.3784	11.8686	10.5643	11.1822	12.4041	11.3615	20.1074	19.6634	20.5921	19.8046	16.1826	19.6356
1302	ENSG00000089048	protein_coding	ESF1 nucleolar pre-rRNA processing protein homolog [Source:HGNC Symbol;Acc:HGNC:15898]	ESF1	53.402	59.1392	55.7249	48.7427	54.9495	43.8062	50.7207	47.7441	44.8983	48.1382	47.1356	48.6547	42.5412	49.4036	53.7372	46.6367	53.0926	53.3285
1303	ENSG00000089050	protein_coding	RB binding protein 9, serine hydrolase [Source:HGNC Symbol;Acc:HGNC:9892]	RBBP9	58.9795	60.3902	59.2112	63.585	60.7135	60.8891	60.2991	62.5124	61.0554	58.0476	59.6067	59.5429	65.0858	64.8183	63.5818	67.4287	66.2171	65.8239
1304	ENSG00000089053	protein_coding	anaphase promoting complex subunit 5 [Source:HGNC Symbol;Acc:HGNC:15713]	ANAPC5	141.358	147.393	158.74	153.274	158.796	149.35	150.748	150.111	146.968	151.006	140.669	158.273	145.238	146.25	146.079	152.339	150.061	154.965
1305	ENSG00000089057	protein_coding	solute carrier family 23 member 2 [Source:HGNC Symbol;Acc:HGNC:10973]	SLC23A2	55.3253	56.9214	53.9255	49.8978	50.9148	56.1074	56.2492	56.8479	52.9768	52.2747	53.9746	55.8609	53.3427	53.2709	50.8998	51.283	51.8609	52.1385
1306	ENSG00000089060	protein_coding	solute carrier family 8 member B1 [Source:HGNC Symbol;Acc:HGNC:26175]	SLC8B1	6.73135	6.2551	7.42248	7.45002	7.68525	7.44242	6.87847	5.9343	7.14643	6.5457	5.63213	6.78536	6.20392	5.71926	5.37372	5.80781	6.83833	6.61958
1307	ENSG00000089063	protein_coding	transmembrane protein 230 [Source:HGNC Symbol;Acc:HGNC:15876]	TMEM230	79.8787	74.9475	80.6352	86.2238	82.2802	83.1392	76.9489	79.3038	78.8438	80.1848	82.0682	80.5828	93.7236	88.7848	88.1289	91.6473	97.9877	92.1535
1308	ENSG00000089091	protein_coding	double zinc ribbon and ankyrin repeat domains 1 [Source:HGNC Symbol;Acc:HGNC:15858]	DZANK1	14.1038	15.7515	14.2827	15.8818	14.3618	12.6097	16.4569	16.117	15.458	16.2279	12.7393	14.3071	14.0696	16.3952	16.723	17.3654	16.6074	16.1027
1309	ENSG00000089094	protein_coding	lysine demethylase 2B [Source:HGNC Symbol;Acc:HGNC:13610]	KDM2B	68.9162	69.0336	65.9589	66.6459	60.3292	65.3237	66.7919	64.1983	70.3768	65.0025	64.7695	68.1166	63.5902	63.0753	65.0435	66.906	59.6761	59.1299
1310	ENSG00000089123	protein_coding	taspase 1 [Source:HGNC Symbol;Acc:HGNC:15859]	TASP1	11.1548	11.3729	10.6276	10.7996	10.0869	10.6431	9.89986	9.50836	11.108	12.8641	12.3371	10.0991	9.58285	11.6564	11.5212	12.9514	11.5105	10.4128
1311	ENSG00000089127	protein_coding	2'-5'-oligoadenylate synthetase 1 [Source:HGNC Symbol;Acc:HGNC:8086]	OAS1	3.65416	3.80993	3.76747	5.08218	3.79459	3.47056	3.59995	3.37176	2.87411	4.3638	3.68771	3.68198	4.04363	4.19413	4.04103	3.13622	3.82267	3.2726
1312	ENSG00000089154	protein_coding	GCN1 activator of EIF2AK4 [Source:HGNC Symbol;Acc:HGNC:4199]	GCN1	325.285	324.64	329.794	354.309	334.164	347.287	328.688	339.064	332.076	328.649	325.256	343.424	333.572	327.305	321.348	315.19	330.703	327.595
1313	ENSG00000089157	protein_coding	ribosomal protein lateral stalk subunit P0 [Source:HGNC Symbol;Acc:HGNC:10371]	RPLP0	803.275	823.683	782.51	845.201	825.588	866.252	824.517	816.843	841.881	808.303	853.402	854.325	925.049	885.615	866.114	883.136	928.951	918.076
1314	ENSG00000089159	protein_coding	paxillin [Source:HGNC Symbol;Acc:HGNC:9718]	PXN	29.8103	30.9912	31.4331	34.7667	30.741	32.7775	30.921	31.1551	32.0813	28.6829	29.6358	29.561	31.8505	32.3547	30.7377	32.3495	34.1067	28.8212
1315	ENSG00000089169	protein_coding	rabphilin 3A [Source:HGNC Symbol;Acc:HGNC:17056]	RPH3A	185.785	181.284	189.948	186.712	179.21	182.32	187.197	186.796	182.545	186.507	175.87	181.416	183.459	192.113	187.177	195.491	179.283	185.348
1316	ENSG00000089177	protein_coding	kinesin family member 16B [Source:HGNC Symbol;Acc:HGNC:15869]	KIF16B	21.4121	20.9262	19.8495	21.426	19.2612	21.9417	22.114	21.6467	17.5554	20.9099	21.9251	21.0925	23.2093	22.5502	22.3117	23.4055	24.1253	24.4329
1317	ENSG00000089195	protein_coding	tRNA methyltransferase 6 [Source:HGNC Symbol;Acc:HGNC:20900]	TRMT6	63.2106	64.7119	63.316	58.9071	66.0451	63.6269	67.3704	67.3003	61.0554	61.1841	65.373	60.4897	62.8147	58.1186	62.5071	63.0148	65.5375	64.5967
1318	ENSG00000089199	protein_coding	chromogranin B [Source:HGNC Symbol;Acc:HGNC:1930]	CHGB	147.641	154.842	159.808	137.103	143.954	140.943	164.633	164.542	151.862	146.187	147.642	144.544	142.69	143.799	151.066	154.546	155.837	142.656
1319	ENSG00000089220	protein_coding	phosphatidylethanolamine binding protein 1 [Source:HGNC Symbol;Acc:HGNC:8630]	PEBP1	200.979	195.614	197.483	199.533	200.249	203.915	203.011	200.889	205.848	195.189	205.774	202.509	193.208	188.845	187.951	190.148	194.064	193.976
1320	ENSG00000089234	protein_coding	BRCA1 associated protein [Source:HGNC Symbol;Acc:HGNC:1099]	BRAP	40.324	38.7248	39.3617	36.4415	37.7538	37.7134	38.5066	37.3591	36.6643	37.8196	39.492	38.1874	40.9348	41.4511	38.7337	39.6093	39.7133	40.4984
1321	ENSG00000089248	protein_coding	endoplasmic reticulum protein 29 [Source:HGNC Symbol;Acc:HGNC:13799]	ERP29	67.7623	73.2984	68.9391	66.1261	69.9358	69.8739	73.6061	72.83	67.1143	70.639	71.4074	68.2744	81.7035	75.6032	74.9741	78.1151	76.3684	74.7864
1322	ENSG00000089280	protein_coding	FUS RNA binding protein [Source:HGNC Symbol;Acc:HGNC:4010]	FUS	715.831	716.892	761.423	699.204	694.603	692.917	715.49	745.496	692.816	717.3	689.735	698.209	665.482	650.907	673.864	700.422	660.472	675.123
1323	ENSG00000089289	protein_coding	immunoglobulin binding protein 1 [Source:HGNC Symbol;Acc:HGNC:5461]	IGBP1	27.5024	24.7361	26.9346	24.7756	26.6582	26.3377	25.7782	27.7833	28.275	27.001	28.2948	26.1421	39.55	36.8756	38.3038	36.8215	38.9063	37.7837
1324	ENSG00000089335	protein_coding	zinc finger protein 302 [Source:HGNC Symbol;Acc:HGNC:13848]	ZNF302	66.8647	69.3748	70.5136	62.0835	71.3768	67.8687	70.0704	65.0075	62.9974	71.3663	74.0894	69.379	67.3015	72.7164	72.9106	71.5523	74.2872	75.4558
1325	ENSG00000089351	protein_coding	GRAM domain containing 1A [Source:HGNC Symbol;Acc:HGNC:29305]	GRAMD1A	75.4552	72.1043	76.1929	81.0839	72.4335	78.049	72.2561	75.8646	77.0572	71.3209	68.5243	78.1106	93.8343	88.8937	89.4616	96.9905	96.1189	90.7775
1326	ENSG00000089486	protein_coding	cell death inducing p53 target 1 [Source:HGNC Symbol;Acc:HGNC:13234]	CDIP1	31.6053	26.8969	27.5532	34.3047	26.8503	31.3893	28.4139	30.4807	32.0813	31.2739	30.2392	31.8228	27.3637	30.6662	28.8461	25.3221	25.9941	26.5155
1327	ENSG00000089505	protein_coding	CKLF like MARVEL transmembrane domain containing 1 [Source:HGNC Symbol;Acc:HGNC:19172]	CMTM1	6.47492	5.23154	5.73556	6.46823	5.76394	5.63002	6.10705	4.92277	3.96161	5.18201	6.57082	5.36517	3.37892	4.30307	4.72887	4.06547	4.07751	4.16513
1328	ENSG00000089558	protein_coding	potassium voltage-gated channel subfamily H member 4 [Source:HGNC Symbol;Acc:HGNC:6253]	KCNH4	11.6677	8.92774	11.4711	12.1279	10.231	10.4117	10.607	12.1383	10.0205	10.9095	10.929	10.0991	11.2446	10.9483	11.3923	10.396	10.4062	9.89218
1329	ENSG00000089597	protein_coding	glucosidase II alpha subunit [Source:HGNC Symbol;Acc:HGNC:4138]	GANAB	347.915	337.321	325.015	354.078	334.789	352.339	329.974	338.592	338.368	341.649	343.292	345.948	358.664	363.255	349.334	334.065	364.343	365.973
1330	ENSG00000089639	protein_coding	GEM interacting protein [Source:HGNC Symbol;Acc:HGNC:24852]	GMIP	17.0528	19.4477	19.5121	18.4229	16.3792	17.507	16.0069	17.1285	16.7009	16.5006	16.5612	18.1995	20.052	19.7723	20.4201	20.8501	19.7929	18.0365
1331	ENSG00000089682	protein_coding	RNA binding motif protein 41 [Source:HGNC Symbol;Acc:HGNC:25617]	RBM41	44.6192	41.2268	45.0972	41.3505	46.1115	39.333	41.3994	38.5729	38.7616	43.9107	40.833	43.0266	40.8794	42.377	45.4401	46.811	45.8295	43.6223
1332	ENSG00000089685	protein_coding	baculoviral IAP repeat containing 5 [Source:HGNC Symbol;Acc:HGNC:593]	BIRC5	173.733	167.466	158.121	170.831	161.198	169.903	165.405	166.902	182.933	162.961	163.801	162.796	177.532	176.97	161.34	166.162	173.931	177.576
1333	ENSG00000089693	protein_coding	myeloid leukemia factor 2 [Source:HGNC Symbol;Acc:HGNC:7126]	MLF2	145.91	143.867	138.159	147.845	139.679	147.306	141.684	139.793	148.599	141.233	144.558	143.702	142.469	148.646	136.019	150.597	148.489	140.015
1334	ENSG00000089723	protein_coding	OTU deubiquitinase, ubiquitin aldehyde binding 2 [Source:HGNC Symbol;Acc:HGNC:20351]	OTUB2	9.03924	8.30223	7.02887	7.73878	8.26164	9.13914	8.61416	8.69914	9.24376	7.54574	8.11295	8.31076	9.69363	10.567	8.51197	7.95671	9.1744	8.70214
1335	ENSG00000089737	protein_coding	DEAD-box helicase 24 [Source:HGNC Symbol;Acc:HGNC:13266]	DDX24	165.207	158.936	162.17	165.402	163.648	167.088	163.733	169.465	165.3	166.097	164.539	159.167	163.739	165.042	162.071	179.287	166.031	165.452
1336	ENSG00000089775	protein_coding	zinc finger and BTB domain containing 25 [Source:HGNC Symbol;Acc:HGNC:13112]	ZBTB25	56.0305	50.6095	52.0698	51.9191	51.3951	49.0506	50.9135	52.3972	54.142	51.3201	47.0685	49.6541	39.7716	44.0111	42.4738	41.8743	38.4815	42.1347
1337	ENSG00000089818	protein_coding	NECAP endocytosis associated 1 [Source:HGNC Symbol;Acc:HGNC:24539]	NECAP1	28.7204	27.7499	28.4529	28.7605	28.2433	29.1141	28.2853	27.4461	29.1295	29.2738	28.8312	27.5097	27.8069	27.8882	29.7489	27.7614	29.562	29.8625
1338	ENSG00000089820	protein_coding	Rho GTPase activating protein 4 [Source:HGNC Symbol;Acc:HGNC:674]	ARHGAP4	7.05189	6.99434	8.15349	7.39226	8.21361	7.63523	7.5856	8.76658	7.30179	7.81848	8.51525	8.25816	9.25049	7.78909	7.99609	8.36325	8.28245	7.77243
1339	ENSG00000089876	protein_coding	DEAH-box helicase 32 (putative) [Source:HGNC Symbol;Acc:HGNC:16717]	DHX32	27.6306	27.3519	28.3966	30.4931	27.7149	27.1475	26.5496	29.1994	28.5081	29.6375	27.4231	29.6136	30.6873	28.1606	30.9956	31.7107	31.5158	29.6765
1340	ENSG00000089902	protein_coding	REST corepressor 1 [Source:HGNC Symbol;Acc:HGNC:17441]	RCOR1	87.8922	86.093	85.3023	83.2785	83.3369	90.1189	90.6415	92.7234	90.7287	84.185	83.6104	84.1596	88.2397	92.1619	87.785	87.8142	85.203	86.1289
1341	ENSG00000089916	protein_coding	G-patch domain containing 2 like [Source:HGNC Symbol;Acc:HGNC:20210]	GPATCH2L	123.28	120.553	113.924	120.067	120.274	120.93	122.72	112.077	121.722	126.732	128.265	123.767	136.652	142.11	141.35	120.164	135.875	131.09
1342	ENSG00000090006	protein_coding	latent transforming growth factor beta binding protein 4 [Source:HGNC Symbol;Acc:HGNC:6717]	LTBP4	23.7841	24.9067	24.348	26.9125	23.1518	26.2991	24.4925	23.5349	24.1581	24.8646	25.2105	25.7739	25.7574	27.1257	28.5882	27.5871	27.3108	29.3418
1343	ENSG00000090013	protein_coding	biliverdin reductase B [Source:HGNC Symbol;Acc:HGNC:1063]	BLVRB	1.34627	1.7628	2.08054	2.54109	1.68115	2.00521	1.86426	1.55101	2.09732	1.63643	2.01148	1.73579	2.21569	1.52514	2.23547	2.43928	1.3167	1.971
1344	ENSG00000090020	protein_coding	solute carrier family 9 member A1 [Source:HGNC Symbol;Acc:HGNC:11071]	SLC9A1	13.0781	13.3632	12.3146	13.1097	10.8554	11.7228	13.8212	12.8127	14.2929	12.8187	12.1359	12.9395	10.9123	10.8394	9.41475	11.906	10.1513	11.231
1345	ENSG00000090054	protein_coding	serine palmitoyltransferase long chain base subunit 1 [Source:HGNC Symbol;Acc:HGNC:11277]	SPTLC1	63.467	63.006	64.6656	58.9649	66.6695	62.4701	65.9562	66.1539	67.5027	64.7297	68.3231	59.5955	65.3074	70.8644	65.3874	65.8606	63.6687	65.2661
1346	ENSG00000090060	protein_coding	poly(A) polymerase alpha [Source:HGNC Symbol;Acc:HGNC:14981]	PAPOLA	331.567	322.82	330.975	322.892	342.474	323.495	332.159	316.541	311.802	329.058	334.71	326.171	331.467	324.854	326.249	336.679	323.653	327.818
1347	ENSG00000090061	protein_coding	cyclin K [Source:HGNC Symbol;Acc:HGNC:1596]	CCNK	58.2102	62.3236	63.316	61.0439	61.53	63.1642	59.4634	59.8825	62.7643	61.4114	63.4956	57.9649	59.3804	63.1843	58.724	62.5502	59.9309	56.7127
1348	ENSG00000090097	protein_coding	poly(rC) binding protein 4 [Source:HGNC Symbol;Acc:HGNC:8652]	PCBP4	100.586	104.29	98.0668	107.188	100.677	99.3351	95.0772	98.9949	99.584	92.2308	90.5164	99.9921	82.3128	80.8323	82.5403	82.3548	87.6665	86.3892
1349	ENSG00000090238	protein_coding	yippee like 3 [Source:HGNC Symbol;Acc:HGNC:18327]	YPEL3	15.0013	15.6946	17.2067	17.2101	16.139	17.8927	16.4569	15.5775	17.0893	18.1825	16.4941	20.6717	21.049	24.1299	20.1192	25.3221	25.8242	21.6066
1350	ENSG00000090263	protein_coding	mitochondrial ribosomal protein S33 [Source:HGNC Symbol;Acc:HGNC:16634]	MRPS33	36.3493	38.1561	38.7431	35.7485	39.8672	39.9886	41.2708	37.8312	44.5875	36.5468	39.9613	39.9758	44.5353	40.5251	40.1094	41.584	42.4741	40.3869
1351	ENSG00000090266	protein_coding	NADH:ubiquinone oxidoreductase subunit B2 [Source:HGNC Symbol;Acc:HGNC:7697]	NDUFB2	44.7475	50.0408	47.1215	49.0315	47.4084	51.3643	46.285	48.4859	49.4813	46.0927	46.331	48.3391	43.5382	41.8323	39.2066	40.7128	40.0955	40.1637
1352	ENSG00000090273	protein_coding	nuclear distribution C, dynein complex regulator [Source:HGNC Symbol;Acc:HGNC:8045]	NUDC	166.553	164.452	163.013	159.569	160.814	158.258	162.319	163.733	167.475	160.233	160.717	153.276	124.078	123.482	117.749	127.888	119.48	116.624
1353	ENSG00000090316	protein_coding	macrophage erythroblast attacher, E3 ubiquitin ligase [Source:HGNC Symbol;Acc:HGNC:13731]	MAEA	72.1857	73.469	72.0881	76.8102	70.9925	79.9	74.1203	76.2018	74.6492	72.3209	74.961	72.1142	70.6804	68.5767	70.7181	71.378	63.5837	71.1047
1354	ENSG00000090372	protein_coding	striatin 4 [Source:HGNC Symbol;Acc:HGNC:15721]	STRN4	147.128	148.36	144.963	154.082	140.016	149.813	135.898	152.134	150.619	141.551	141.004	149.488	142.026	139.55	137.438	145.776	137.489	138.453
1355	ENSG00000090432	protein_coding	mitochondrial E3 ubiquitin protein ligase 1 [Source:HGNC Symbol;Acc:HGNC:25762]	MUL1	22.9507	23.9969	21.3678	25.4687	24.6408	25.5665	24.7496	27.9856	25.0125	24.2282	24.1377	26.0369	23.2093	22.7681	21.5808	21.9535	23.4032	25.1023
1356	ENSG00000090447	protein_coding	transcription factor AP-4 [Source:HGNC Symbol;Acc:HGNC:11745]	TFAP4	33.7209	35.3129	35.3693	33.2652	32.4221	35.8625	34.1352	36.5499	33.9456	35.1377	32.3177	34.9788	33.7338	33.3896	33.618	41.1193	34.3191	34.1392
1357	ENSG00000090470	protein_coding	programmed cell death 7 [Source:HGNC Symbol;Acc:HGNC:8767]	PDCD7	55.3253	55.0449	52.8009	52.0924	51.0589	54.7577	50.7207	52.06	53.909	48.0473	47.672	49.7067	42.7074	46.5167	44.7953	46.114	47.1038	44.7008
1358	ENSG00000090487	protein_coding	SPG21 abhydrolase domain containing, maspardin [Source:HGNC Symbol;Acc:HGNC:20373]	SPG21	70.2625	72.2749	69.7264	73.8071	69.5035	75.8896	70.7133	71.3465	70.6876	70.3663	71.3404	73.7448	67.2461	65.6354	66.3761	67.3126	68.2134	73.2244
1359	ENSG00000090520	protein_coding	DnaJ heat shock protein family (Hsp40) member B11 [Source:HGNC Symbol;Acc:HGNC:14889]	DNAJB11	69.0444	64.8825	63.5972	56.7125	61.7702	59.5008	65.7633	71.4139	65.0947	62.6842	66.2446	60.6475	28.7485	33.2262	31.2105	30.9557	31.5582	29.8997
1360	ENSG00000090565	protein_coding	RAB11 family interacting protein 3 [Source:HGNC Symbol;Acc:HGNC:17224]	RAB11FIP3	59.7487	59.5941	57.6367	63.354	57.6874	58.344	56.6992	61.1637	59.5795	56.093	52.9018	56.7025	52.401	54.0879	55.3278	53.8965	55.8534	52.9194
1361	ENSG00000090581	protein_coding	N-acetylglucosamine-1-phosphate transferase subunit gamma [Source:HGNC Symbol;Acc:HGNC:23026]	GNPTG	22.0532	22.5752	24.4042	23.9671	21.4226	23.0599	19.9283	23.8721	23.2259	19.0916	16.7623	22.8283	22.7662	19.8268	22.0537	23.812	22.8511	22.2388
1362	ENSG00000090612	protein_coding	zinc finger protein 268 [Source:HGNC Symbol;Acc:HGNC:13061]	ZNF268	67.1853	67.7257	61.0668	57.6943	64.5081	58.9995	61.6491	58.6686	55.1518	66.1843	70.4687	62.5937	60.1559	62.4217	67.6228	62.8986	66.8967	65.9727
1363	ENSG00000090615	protein_coding	golgin A3 [Source:HGNC Symbol;Acc:HGNC:4426]	GOLGA3	127.19	116.345	116.904	117.699	105.096	114.721	117.127	118.753	120.091	111.459	110.899	104.095	97.3794	101.149	100.811	96.7001	95.4818	97.3227
1364	ENSG00000090621	protein_coding	poly(A) binding protein cytoplasmic 4 [Source:HGNC Symbol;Acc:HGNC:8557]	PABPC4	241.559	239.4	239.431	244.407	243.334	244.674	239.332	240.946	249.426	244.964	243.523	244.536	238.629	245.166	233.09	245.206	239.979	244.404
1365	ENSG00000090661	protein_coding	ceramide synthase 4 [Source:HGNC Symbol;Acc:HGNC:23747]	CERS4	14.1679	12.169	13.8328	12.2434	13.6894	13.8822	13.1141	14.566	13.4384	13.0459	11.9348	12.0979	15.0667	12.8003	14.2296	13.8807	14.9084	13.797
1366	ENSG00000090674	protein_coding	mucolipin TRP cation channel 1 [Source:HGNC Symbol;Acc:HGNC:13356]	MCOLN1	15.1936	15.3534	16.0258	19.2892	15.4666	16.8901	15.4926	16.7914	17.2447	17.8189	16.0248	17.4105	17.1716	15.6327	13.8427	13.0676	15.8004	16.1771
1367	ENSG00000090686	protein_coding	ubiquitin specific peptidase 48 [Source:HGNC Symbol;Acc:HGNC:18533]	USP48	127.96	128.571	132.986	125.264	134.972	124.13	124.97	127.385	127.16	126.914	124.712	130.237	134.104	133.94	137.223	129.979	128.272	129.714
1368	ENSG00000090776	protein_coding	ephrin B1 [Source:HGNC Symbol;Acc:HGNC:3226]	EFNB1	14.5525	12.3965	12.652	12.7055	11.8161	12.1084	11.2498	13.2847	13.8268	12.5005	12.7393	12.4135	9.47206	10.4036	10.5325	8.07286	10.2787	9.37154
1369	ENSG00000090857	protein_coding	pyruvate dehydrogenase phosphatase regulatory subunit [Source:HGNC Symbol;Acc:HGNC:30264]	PDPR	93.9825	96.0443	98.7978	92.9808	99.1397	95.3247	100.349	97.7811	96.9429	99.1401	94.4723	102.254	116.434	112.588	113.364	109.884	113.406	117.962
1370	ENSG00000090861	protein_coding	alanyl-tRNA synthetase 1 [Source:HGNC Symbol;Acc:HGNC:20]	AARS1	160.911	160.472	160.146	154.891	154.618	155.712	167.783	174.994	168.718	161.097	155.956	159.693	115.936	119.396	115.47	115.982	115.19	112.198
1371	ENSG00000090863	protein_coding	golgi glycoprotein 1 [Source:HGNC Symbol;Acc:HGNC:4316]	GLG1	171.425	172.584	167.737	174.238	166.386	177.693	171.19	177.962	177.729	182.234	173.121	173.579	199.024	202.081	204.803	201.008	199.628	203.422
1372	ENSG00000090889	protein_coding	kinesin family member 4A [Source:HGNC Symbol;Acc:HGNC:13339]	KIF4A	127.383	128.514	135.292	125.091	127.335	131.071	142.519	134.601	137.647	130.641	134.098	136.181	168.835	162.318	159.492	166.626	154.818	159.019
1373	ENSG00000090905	protein_coding	trinucleotide repeat containing adaptor 6A [Source:HGNC Symbol;Acc:HGNC:11969]	TNRC6A	189.247	190.212	200.407	186.308	189.057	191.421	182.376	181.536	173.922	195.826	175.803	180.259	189.22	202.353	200.289	200.486	191.813	195.092
1374	ENSG00000090924	protein_coding	pleckstrin homology and RhoGEF domain containing G2 [Source:HGNC Symbol;Acc:HGNC:29515]	PLEKHG2	75.8399	78.3594	83.6716	83.163	78.2935	78.049	78.8774	81.7315	78.2224	80.594	74.1564	75.954	76.275	81.3225	80.9926	84.1552	77.0905	79.249
1375	ENSG00000090932	protein_coding	delta like canonical Notch ligand 3 [Source:HGNC Symbol;Acc:HGNC:2909]	DLL3	6.21849	7.96104	8.7158	8.5473	7.10886	8.21366	6.49276	7.48531	8.62233	7.72756	7.10722	8.31076	8.08726	7.51675	6.62042	5.86589	7.51791	7.5493
1376	ENSG00000090971	protein_coding	N-acetyltransferase 14 (putative) [Source:HGNC Symbol;Acc:HGNC:28918]	NAT14	20.3223	24.1106	22.4361	24.9489	22.7676	24.641	19.6711	23.0628	20.1964	22.319	23.6684	24.4063	21.9907	21.3519	20.807	19.5143	23.2758	22.5363
1377	ENSG00000090989	protein_coding	exocyst complex component 1 [Source:HGNC Symbol;Acc:HGNC:30380]	EXOC1	84.8791	81.032	82.7157	81.7769	86.411	77.8177	84.2131	82.271	78.8438	82.1395	78.5146	80.5828	85.4147	90.5823	85.2486	84.3875	89.9601	86.2033
1378	ENSG00000091009	protein_coding	RNA binding motif protein 27 [Source:HGNC Symbol;Acc:HGNC:29243]	RBM27	48.9786	44.2406	46.1656	47.1257	45.5351	47.6624	48.085	46.2606	46.2188	42.047	46.5992	46.8663	47.5265	47.1703	44.4084	43.5005	45.6172	44.8495
1379	ENSG00000091039	protein_coding	oxysterol binding protein like 8 [Source:HGNC Symbol;Acc:HGNC:16396]	OSBPL8	160.527	158.482	163.407	151.946	163.023	152.165	159.941	147.211	151.007	155.779	160.985	152.381	153.713	168.092	166.585	148.099	163.355	162.849
1380	ENSG00000091073	protein_coding	deltex E3 ubiquitin ligase 2 [Source:HGNC Symbol;Acc:HGNC:15973]	DTX2	7.43654	7.61985	7.02887	6.46823	6.82066	6.70975	6.94276	7.68761	7.37947	6.90935	7.10722	6.83796	8.25343	7.57122	6.83537	6.73706	6.66843	6.24769
1381	ENSG00000091127	protein_coding	pseudouridine synthase 7 [Source:HGNC Symbol;Acc:HGNC:26033]	PUS7	111.356	117.141	116.229	103.087	111.484	104.502	110.184	108.166	109.682	117.05	104.865	104.463	86.4118	87.9133	91.7831	98.7909	91.1919	91.5213
1382	ENSG00000091129	protein_coding	neuronal cell adhesion molecule [Source:HGNC Symbol;Acc:HGNC:7994]	NRCAM	663.198	657.753	642.663	630.826	635.858	616.988	636.291	612.851	613.584	637.024	644.745	627.988	731.066	734.463	726.655	719.007	699.846	730.943
1383	ENSG00000091136	protein_coding	laminin subunit beta 1 [Source:HGNC Symbol;Acc:HGNC:6486]	LAMB1	449.013	460.489	468.741	456.472	464.429	442.882	480.593	462.201	437.797	464.836	442.122	470.978	521.794	535.214	526.323	547.328	532.668	533.62
1384	ENSG00000091140	protein_coding	dihydrolipoamide dehydrogenase [Source:HGNC Symbol;Acc:HGNC:2898]	DLD	123.472	125.728	131.243	124.629	128.296	126.907	129.791	122.53	125.762	127.187	127.326	128.08	121.087	122.937	127.508	124.113	130.948	120.9
1385	ENSG00000091157	protein_coding	WD repeat domain 7 [Source:HGNC Symbol;Acc:HGNC:13490]	WDR7	36.0929	34.0619	31.9392	33.785	34.3915	33.4331	35.9995	32.5712	33.4018	33.0467	33.5917	34.7684	30.6319	29.7402	30.3507	30.3749	28.7125	28.8956
1386	ENSG00000091164	protein_coding	thioredoxin like 1 [Source:HGNC Symbol;Acc:HGNC:12436]	TXNL1	92.2516	93.8266	96.3236	88.2451	95.7774	94.3607	99.77	91.7793	99.584	92.2308	92.3268	91.7339	103.75	104.744	99.8651	104.831	100.579	101.934
1387	ENSG00000091317	protein_coding	CKLF like MARVEL transmembrane domain containing 6 [Source:HGNC Symbol;Acc:HGNC:19177]	CMTM6	69.4291	65.0531	69.389	60.9862	71.2327	66.9433	69.1704	71.4139	70.2215	68.8208	68.4572	64.2769	65.9167	66.4524	62.593	65.8025	63.7961	63.7785
1388	ENSG00000091428	protein_coding	Rap guanine nucleotide exchange factor 4 [Source:HGNC Symbol;Acc:HGNC:16626]	RAPGEF4	34.2337	34.6305	33.6261	36.2105	37.9459	38.7546	34.9066	33.1107	33.0134	36.9105	36.0054	37.714	45.6431	40.743	41.5281	46.811	39.5434	43.176
1389	ENSG00000091436	protein_coding	mitogen-activated protein kinase kinase kinase 20 [Source:HGNC Symbol;Acc:HGNC:17797]	MAP3K20	68.3392	70.4552	66.8024	66.6459	70.4161	66.4419	68.6561	64.8052	63.6965	68.8208	72.212	66.9594	71.3451	71.6815	73.8563	71.2619	66.9392	68.9477
1390	ENSG00000091483	protein_coding	fumarate hydratase [Source:HGNC Symbol;Acc:HGNC:3700]	FH	113.471	114.241	109.538	114.58	114.174	114.027	118.734	114.64	117.295	116.277	119.348	115.141	92.4495	90.4733	87.2691	89.0338	88.8133	92.0791
1391	ENSG00000091490	protein_coding	SEL1L family member 3 [Source:HGNC Symbol;Acc:HGNC:29108]	SEL1L3	3.26951	2.7295	2.53039	2.31008	3.0741	3.04638	3.02138	3.16945	3.10715	3.40922	2.95017	3.10338	2.1049	1.85195	2.02052	1.8585	1.82639	1.67349
1392	ENSG00000091527	protein_coding	CDV3 homolog [Source:HGNC Symbol;Acc:HGNC:26928]	CDV3	181.811	174.347	175.441	164.478	163.119	169.556	176.526	173.376	173.767	174.552	169.232	165.216	162.742	160.303	152.27	161.98	158.641	159.167
1393	ENSG00000091542	protein_coding	alkB homolog 5, RNA demethylase [Source:HGNC Symbol;Acc:HGNC:25996]	ALKBH5	86.4818	81.6007	82.8282	84.8955	82.6164	84.9516	78.9417	87.396	88.476	75.3665	77.2407	78.9522	84.5285	79.4161	74.8881	75.9662	78.1098	80.6622
1394	ENSG00000091640	protein_coding	sperm associated antigen 7 [Source:HGNC Symbol;Acc:HGNC:11216]	SPAG7	35.5159	35.4835	34.2446	34.6512	31.8938	35.7853	35.1638	35.5384	35.3438	33.0922	34.3292	34.3476	34.2324	34.8603	35.4665	37.8669	35.5083	35.3292
1395	ENSG00000091651	protein_coding	origin recognition complex subunit 6 [Source:HGNC Symbol;Acc:HGNC:17151]	ORC6	60.1334	60.2765	62.5288	65.5486	64.412	61.2361	67.6919	62.0404	63.9295	64.8206	64.5013	58.8591	57.2755	54.7415	55.2848	61.3305	55.8534	62.105
1396	ENSG00000091656	protein_coding	zinc finger homeobox 4 [Source:HGNC Symbol;Acc:HGNC:30939]	ZFHX4	84.9432	80.2928	83.3905	86.7436	81.6078	90.6202	81.1274	80.4502	74.5715	84.3214	86.3594	85.4745	96.7701	99.5152	103.863	95.7709	94.6323	92.3766
1397	ENSG00000091732	protein_coding	zinc finger C3HC-type containing 1 [Source:HGNC Symbol;Acc:HGNC:29913]	ZC3HC1	36.6057	37.3032	37.1124	34.247	35.16	36.6337	35.8066	36.0778	35.8875	39.1378	36.2736	38.0822	38.0544	35.1326	36.2403	35.0211	38.0568	38.4531
1398	ENSG00000091844	protein_coding	regulator of G protein signaling 17 [Source:HGNC Symbol;Acc:HGNC:14088]	RGS17	39.2342	37.6444	39.7553	34.5357	38.2341	32.7775	39.0851	35.8755	37.5965	40.4561	34.7985	36.8198	34.2878	41.7779	40.7113	35.8342	37.1224	39.2712
1399	ENSG00000091947	protein_coding	transmembrane protein 101 [Source:HGNC Symbol;Acc:HGNC:28653]	TMEM101	13.2704	13.4769	13.9453	13.514	12.9689	14.1522	12.5998	13.9591	15.6911	13.3641	12.6723	12.9921	14.2358	13.6173	15.4763	13.9968	15.503	14.9126
1400	ENSG00000091972	protein_coding	CD200 molecule [Source:HGNC Symbol;Acc:HGNC:7203]	CD200	35.003	36.2796	36.7188	36.4993	37.3215	38.1762	34.5209	37.2242	36.2759	36.7741	37.6817	35.9782	39.55	41.0698	40.4533	40.2482	39.3735	38.9737
1401	ENSG00000092010	protein_coding	proteasome activator subunit 1 [Source:HGNC Symbol;Acc:HGNC:9568]	PSME1	34.6184	31.3892	35.4817	36.2105	35.8325	36.9036	34.5852	34.5943	35.0331	34.9104	37.7487	36.662	39.55	37.9106	36.7992	33.9757	39.8407	39.5315
1402	ENSG00000092020	protein_coding	protein phosphatase 2 regulatory subunit B''gamma [Source:HGNC Symbol;Acc:HGNC:17485]	PPP2R3C	47.7605	47.7662	51.3951	48.685	53.0282	45.233	49.4993	43.8329	46.3741	51.411	52.4995	48.4969	49.9083	51.7457	48.7933	51.2249	53.6448	51.246
1403	ENSG00000092036	protein_coding	HAUS augmin like complex subunit 4 [Source:HGNC Symbol;Acc:HGNC:20163]	HAUS4	10.0009	11.0886	12.7644	13.3407	12.6326	11.6842	11.8927	10.9919	14.5259	12.0459	13.8121	12.9921	13.2387	13.7807	14.4016	13.4741	13.2944	14.0201
1404	ENSG00000092051	protein_coding	junctophilin 4 [Source:HGNC Symbol;Acc:HGNC:20156]	JPH4	124.37	124.931	129.331	128.96	122.388	123.822	125.098	129.206	130.966	121.868	115.123	126.239	109.455	114.222	112.461	110.465	108.734	106.099
1405	ENSG00000092094	protein_coding	O-sialoglycoprotein endopeptidase [Source:HGNC Symbol;Acc:HGNC:18028]	OSGEP	27.7588	31.3892	33.5136	30.2043	30.5969	27.6102	30.0853	29.8738	30.9161	31.4103	26.0151	26.6681	29.1363	30.067	32.7582	31.7687	28.4576	32.6144
1406	ENSG00000092096	protein_coding	solute carrier family 22 member 17 [Source:HGNC Symbol;Acc:HGNC:23095]	SLC22A17	72.6345	79.4967	71.4695	87.3211	74.8832	80.8641	73.9918	74.381	77.7563	78.0484	71.8768	80.5302	63.0917	62.2583	59.5838	59.2978	64.1359	62.5513
1407	ENSG00000092108	protein_coding	sec1 family domain containing 1 [Source:HGNC Symbol;Acc:HGNC:20726]	SCFD1	66.2237	70.5121	64.778	66.5304	71.713	60.1564	70.0061	67.0306	63.7742	67.2753	65.8423	65.8548	64.8642	68.7401	72.1368	70.4488	66.8542	67.423
1408	ENSG00000092140	protein_coding	G2/M-phase specific E3 ubiquitin protein ligase [Source:HGNC Symbol;Acc:HGNC:20338]	G2E3	79.0453	87.1165	87.3829	81.3149	82.2802	76.9308	85.2416	81.9338	83.5822	85.0487	82.2023	81.74	98.9858	107.25	108.592	101.288	98.6248	102.938
1409	ENSG00000092148	protein_coding	HECT domain E3 ubiquitin protein ligase 1 [Source:HGNC Symbol;Acc:HGNC:20157]	HECTD1	294.449	294.9	283.01	288.183	286.372	281.848	291.531	283.767	272.186	283.647	280.4	289.246	270.425	264.775	268.643	248.807	265.038	263.444
1410	ENSG00000092199	protein_coding	heterogeneous nuclear ribonucleoprotein C [Source:HGNC Symbol;Acc:HGNC:5035]	HNRNPC	428.627	439.449	438.264	413.736	444.352	439.45	447.358	440.487	459.158	428.471	458.684	423.27	446.461	438.64	432.305	466.077	432.684	432.801
1411	ENSG00000092201	protein_coding	SPT16 homolog, facilitates chromatin remodeling subunit [Source:HGNC Symbol;Acc:HGNC:11465]	SUPT16H	513.057	510.246	498.993	501.808	516.017	510.982	527.457	496.998	491.939	500.383	508.367	495.489	508.002	498.556	492.791	513.992	499.665	513.166
1412	ENSG00000092203	protein_coding	TOX high mobility group box family member 4 [Source:HGNC Symbol;Acc:HGNC:20161]	TOX4	59.877	60.7314	58.5364	60.4087	58.4559	58.8453	56.3135	61.7032	58.3367	60.8659	54.7792	56.5447	64.7534	63.0209	65.0435	60.9821	65.4101	63.1463
1413	ENSG00000092208	protein_coding	gem nuclear organelle associated protein 2 [Source:HGNC Symbol;Acc:HGNC:10884]	GEMIN2	8.39816	8.30223	7.87233	7.21901	6.91673	7.09537	8.61416	8.83401	8.54465	7.36391	6.36967	7.99516	8.03186	7.2444	6.53444	5.74974	7.43297	7.40054
1414	ENSG00000092330	protein_coding	TERF1 interacting nuclear factor 2 [Source:HGNC Symbol;Acc:HGNC:11824]	TINF2	26.669	24.5086	24.0668	25.7574	24.0164	28.1501	27.0639	25.7603	24.7795	24.8646	24.8082	24.8271	24.151	26.0907	23.8593	23.9863	25.2721	24.9536
1415	ENSG00000092421	protein_coding	semaphorin 6A [Source:HGNC Symbol;Acc:HGNC:10738]	SEMA6A	21.4121	22.5752	22.2112	22.0613	22.1431	22.5586	20.4426	20.9724	22.9929	22.319	21.6569	22.3023	25.6466	29.141	26.6106	24.8574	27.2259	26.9618
1416	ENSG00000092439	protein_coding	transient receptor potential cation channel subfamily M member 7 [Source:HGNC Symbol;Acc:HGNC:17994]	TRPM7	122.254	122.031	114.486	117.006	119.506	104.811	116.098	102.097	110.459	119.55	114.52	111.354	110.452	117.762	112.848	110.871	111.112	114.095
1417	ENSG00000092445	protein_coding	TYRO3 protein tyrosine kinase [Source:HGNC Symbol;Acc:HGNC:12446]	TYRO3	37.2468	36.8482	36.1565	35.2288	35.7364	36.0167	32.4638	38.0335	35.3438	37.3196	36.9441	35.1366	32.1275	28.9776	28.1153	27.6452	28.8824	28.4865
1418	ENSG00000092470	protein_coding	WD repeat domain 76 [Source:HGNC Symbol;Acc:HGNC:25773]	WDR76	86.61	88.5381	84.5713	84.4913	84.97	85.0673	86.5916	83.3499	90.7287	89.3216	86.3594	87.6311	65.1412	66.7248	67.021	72.5396	67.7462	67.9808
1419	ENSG00000092531	protein_coding	synaptosome associated protein 23 [Source:HGNC Symbol;Acc:HGNC:11131]	SNAP23	14.1679	13.42	15.9696	12.821	15.3225	13.6123	15.4283	13.7568	14.5259	14.7278	13.4769	12.4135	13.7373	12.9092	16.2071	14.2872	12.4874	14.6523
1420	ENSG00000092621	protein_coding	phosphoglycerate dehydrogenase [Source:HGNC Symbol;Acc:HGNC:8923]	PHGDH	158.283	157.117	149.068	163.265	152.552	157.563	156.019	161.71	159.164	160.461	162.192	162.638	111.172	117.762	106.486	109.942	112.471	110.45
1421	ENSG00000092758	protein_coding	collagen type IX alpha 3 chain [Source:HGNC Symbol;Acc:HGNC:2219]	COL9A3	1.15395	2.04712	1.57447	2.13683	1.58508	1.3111	1.6714	2.22536	2.175	2.09099	1.20689	1.57799	1.55098	1.90642	1.46165	1.80042	1.48659	1.71068
1422	ENSG00000092820	protein_coding	ezrin [Source:HGNC Symbol;Acc:HGNC:12691]	EZR	84.9432	87.7989	88.395	82.4699	90.6379	88.1908	91.2201	89.6888	87.0001	82.2304	87.231	89.9455	99.7613	95.7568	96.5549	95.2482	97.3931	95.612
1423	ENSG00000092841	protein_coding	myosin light chain 6 [Source:HGNC Symbol;Acc:HGNC:7587]	MYL6	171.746	168.319	166.275	169.445	164.176	170.983	175.626	172.23	173.767	163.006	172.316	165.426	172.824	156.218	159.578	171.737	164.884	161.696
1424	ENSG00000092847	protein_coding	argonaute RISC component 1 [Source:HGNC Symbol;Acc:HGNC:3262]	AGO1	117.19	124.363	123.933	114.234	120.466	117.691	119.377	131.971	124.13	127.05	119.415	122.084	123.746	123.917	121.661	126.262	117.526	115.248
1425	ENSG00000092853	protein_coding	claspin [Source:HGNC Symbol;Acc:HGNC:19715]	CLSPN	164.245	163.372	163.632	158.76	166.722	151.663	168.298	150.65	140.676	173.097	158.571	160.219	114.496	119.288	124.111	145.428	116.889	122.908
1426	ENSG00000092871	protein_coding	ring finger and FYVE like domain containing E3 ubiquitin protein ligase [Source:HGNC Symbol;Acc:HGNC:24821]	RFFL	12.8216	13.2494	12.2583	12.7055	12.5846	12.2241	11.507	14.4311	13.9045	12.3641	13.3428	15.2013	13.7927	13.6173	13.4988	13.8226	14.5686	12.1979
1427	ENSG00000092929	protein_coding	unc-13 homolog D [Source:HGNC Symbol;Acc:HGNC:23147]	UNC13D	53.0815	56.694	53.3632	62.0257	53.5566	58.6139	50.7207	59.9499	57.7152	55.4112	50.6222	56.2817	46.5294	46.9524	48.0195	46.9852	49.185	50.1675
1428	ENSG00000092931	protein_coding	major facilitator superfamily domain containing 11 [Source:HGNC Symbol;Acc:HGNC:25458]	MFSD11	30.1949	30.5931	31.9954	32.2834	32.8064	33.3945	33.0424	31.5597	32.392	34.3649	31.1779	32.98	34.7863	34.9147	35.4665	35.0211	35.7632	34.8458
1429	ENSG00000092964	protein_coding	dihydropyrimidinase like 2 [Source:HGNC Symbol;Acc:HGNC:3014]	DPYSL2	577.229	571.148	554.662	575.268	580.092	601.911	549.185	537.526	575.909	548.112	518.29	558.609	585.938	570.456	544.895	537.629	569.832	560.321
1430	ENSG00000092978	protein_coding	G-patch domain containing 2 [Source:HGNC Symbol;Acc:HGNC:25499]	GPATCH2	52.9533	52.5997	53.0258	49.378	54.181	49.8604	52.7778	49.43	50.8795	50.6383	59.1374	50.4431	50.4069	51.1466	53.4792	54.3031	54.5367	52.1757
1431	ENSG00000093000	protein_coding	nucleoporin 50 [Source:HGNC Symbol;Acc:HGNC:8065]	NUP50	160.206	153.023	154.579	152.234	160.766	156.368	156.405	156.787	149.221	155.233	156.828	153.486	146.18	145.433	143.973	141.885	145.983	145.445
1432	ENSG00000093009	protein_coding	cell division cycle 45 [Source:HGNC Symbol;Acc:HGNC:1739]	CDC45	79.494	71.82	74.7309	81.0261	76.8045	81.0183	74.1203	77.8877	73.3286	79.8667	75.0281	78.584	56.0015	59.5348	55.6287	59.3559	54.8765	58.7209
1433	ENSG00000093010	protein_coding	catechol-O-methyltransferase [Source:HGNC Symbol;Acc:HGNC:2228]	COMT	23.4636	21.8929	22.6048	23.1586	20.2218	21.9031	21.2783	22.5234	23.0706	24.2282	20.9194	21.3029	23.3201	23.8575	23.0425	27.1225	24.55	21.4207
1434	ENSG00000093144	protein_coding	ethylmalonyl-CoA decarboxylase 1 [Source:HGNC Symbol;Acc:HGNC:21489]	ECHDC1	65.9031	68.6355	68.3768	64.8556	67.0058	62.9328	63.5134	65.8168	62.9197	66.4571	70.4017	64.6977	58.2726	55.7764	58.552	60.169	60.9503	62.291
1435	ENSG00000093167	protein_coding	LRR binding FLII interacting protein 2 [Source:HGNC Symbol;Acc:HGNC:6703]	LRRFIP2	48.5298	49.1879	51.3951	48.5117	49.1376	48.8963	52.7778	49.2951	47.85	48.5473	47.0015	47.6027	52.8995	49.9482	52.6194	52.038	50.2893	49.684
1436	ENSG00000093183	protein_coding	SEC22 homolog C, vesicle trafficking protein [Source:HGNC Symbol;Acc:HGNC:16828]	SEC22C	86.9306	84.1027	83.5592	82.6432	84.4417	87.1882	90.7058	89.6214	85.2911	87.3215	81.4648	85.1589	90.4	87.9133	84.8187	86.7107	87.7939	87.3933
1437	ENSG00000093217	protein_coding	xylulokinase [Source:HGNC Symbol;Acc:HGNC:12839]	XYLB	23.72	26.1008	24.7416	24.7179	24.5448	23.3299	24.6211	24.0744	22.4491	26.001	22.1262	25.4583	21.6583	22.3868	22.8275	23.2313	19.4531	21.2347
1438	ENSG00000094631	protein_coding	histone deacetylase 6 [Source:HGNC Symbol;Acc:HGNC:14064]	HDAC6	52.5686	57.8881	65.2279	65.9528	60.2331	59.925	55.3492	57.6571	58.4143	61.1387	60.1431	60.0163	73.8932	72.553	72.6956	69.9842	71.9936	76.6458
1439	ENSG00000094804	protein_coding	cell division cycle 6 [Source:HGNC Symbol;Acc:HGNC:1744]	CDC6	112.702	111.909	105.545	105.398	107.257	99.7979	113.077	111.808	109.061	110.277	107.748	100.413	72.8407	73.0977	73.1685	74.7466	75.7313	75.2326
1440	ENSG00000094841	protein_coding	uracil phosphoribosyltransferase homolog [Source:HGNC Symbol;Acc:HGNC:28334]	UPRT	11.2189	14.4436	14.2264	13.4562	13.3531	13.4966	11.6998	11.936	14.2929	13.5005	13.4769	12.9395	13.848	12.7458	13.2408	13.6484	14.5261	13.5367
1441	ENSG00000094880	protein_coding	cell division cycle 23 [Source:HGNC Symbol;Acc:HGNC:1724]	CDC23	61.6079	58.798	60.617	56.9435	58.1677	56.6858	63.3848	61.4335	60.9001	59.8204	60.1431	58.5435	62.6485	58.7723	61.1744	58.8912	60.9503	59.8737
1442	ENSG00000094914	protein_coding	aladin WD repeat nucleoporin [Source:HGNC Symbol;Acc:HGNC:13666]	AAAS	55.5817	53.6802	52.4072	58.0986	52.692	54.1407	50.9778	51.2508	56.0063	52.2747	53.17	53.1257	51.5147	51.3644	52.7484	51.3411	49.4823	51.4691
1443	ENSG00000094916	protein_coding	chromobox 5 [Source:HGNC Symbol;Acc:HGNC:1555]	CBX5	1287.87	1267.17	1218.47	1259.98	1262.83	1268.61	1280.23	1252.14	1289.78	1177.04	1170.21	1237.09	1188.99	1184.05	1103.16	1152.39	1162.39	1165.19
1444	ENSG00000094975	protein_coding	SUN domain containing ossification factor [Source:HGNC Symbol;Acc:HGNC:1240]	SUCO	140.204	135.11	139.003	132.31	141.361	129.105	137.119	126.104	128.403	135.232	135.439	134.445	136.376	144.071	140.791	124.578	142.331	139.606
1445	ENSG00000095002	protein_coding	mutS homolog 2 [Source:HGNC Symbol;Acc:HGNC:7325]	MSH2	253.227	250.432	247.416	246.832	258.272	249.996	260.482	234.202	233.657	247.737	255.86	245.904	221.181	222.779	221.096	207.687	220.186	220.529
1446	ENSG00000095015	protein_coding	mitogen-activated protein kinase kinase kinase 1 [Source:HGNC Symbol;Acc:HGNC:6848]	MAP3K1	190.465	190.553	187.98	192.488	202.891	196.896	194.397	186.863	187.827	201.917	201.215	193.304	219.519	224.304	222.042	232.487	234.712	229.566
1447	ENSG00000095059	protein_coding	deoxyhypusine synthase [Source:HGNC Symbol;Acc:HGNC:2869]	DHPS	5.76973	6.99434	8.26595	8.37405	7.44509	6.59406	6.81419	5.9343	5.74822	7.72756	6.63787	8.15296	6.14853	7.13546	7.43722	8.7698	7.51791	7.8468
1448	ENSG00000095066	protein_coding	hook microtubule tethering protein 2 [Source:HGNC Symbol;Acc:HGNC:19885]	HOOK2	26.9895	25.3047	30.5334	26.2772	24.833	23.1756	22.4354	26.9066	26.2554	23.9555	25.0094	25.2479	24.9265	25.9273	27.5564	24.2186	25.7393	27.2221
1449	ENSG00000095139	protein_coding	archain 1 [Source:HGNC Symbol;Acc:HGNC:649]	ARCN1	174.759	178.782	171.167	169.907	167.923	173.335	185.719	184.3	175.554	172.188	171.244	170.002	173.931	167.384	162.716	161.864	163.95	162.812
1450	ENSG00000095203	protein_coding	erythrocyte membrane protein band 4.1 like 4B [Source:HGNC Symbol;Acc:HGNC:19818]	EPB41L4B	5.00043	7.16494	5.34194	4.67792	4.56312	5.39865	6.17134	6.06917	8.70001	6.04568	6.10148	5.15477	4.9853	3.92178	4.85784	5.74974	5.47916	5.05766
1451	ENSG00000095209	protein_coding	transmembrane protein 38B [Source:HGNC Symbol;Acc:HGNC:25535]	TMEM38B	14.1038	15.8084	14.62	13.283	13.9295	13.3038	16.0069	15.1729	13.3607	14.5005	16.7623	14.8857	10.5799	10.9483	10.6615	13.1257	9.98141	11.1938
1452	ENSG00000095261	protein_coding	proteasome 26S subunit, non-ATPase 5 [Source:HGNC Symbol;Acc:HGNC:9563]	PSMD5	42.6319	41.4543	45.772	42.159	44.1902	42.3023	45.1279	43.4283	41.5581	42.7289	41.6376	41.7642	46.1417	44.4469	43.3766	41.9324	42.3042	42.8413
1453	ENSG00000095319	protein_coding	nucleoporin 188 [Source:HGNC Symbol;Acc:HGNC:17859]	NUP188	207.646	203.291	197.877	214.202	195.974	204.879	198.704	211.342	207.868	193.689	194.443	205.612	174.098	169.672	163.275	166.336	167.178	167.907
1454	ENSG00000095321	protein_coding	carnitine O-acetyltransferase [Source:HGNC Symbol;Acc:HGNC:2342]	CRAT	23.9764	23.2007	23.1671	25.1221	24.7369	24.1782	22.114	25.5579	23.7697	23.0463	24.0707	23.8803	24.8711	26.0363	24.2032	25.4382	26.0366	25.5486
1455	ENSG00000095370	protein_coding	SH2 domain containing 3C [Source:HGNC Symbol;Acc:HGNC:16884]	SH2D3C	18.6555	20.0163	20.8617	22.35	22.0471	20.6691	16.6498	17.668	22.5268	19.6371	19.6454	19.7249	24.0956	25.2192	24.6331	25.4963	23.8704	22.1644
1456	ENSG00000095380	protein_coding	N-acetylneuraminate synthase [Source:HGNC Symbol;Acc:HGNC:19237]	NANS	21.7326	21.7223	21.9301	23.5051	19.9336	22.0959	20.2497	22.6582	21.9054	21.0917	23.8695	21.1977	13.5157	13.8896	13.4988	13.2999	12.7847	13.0904
1457	ENSG00000095485	protein_coding	CWF19 like cell cycle control factor 1 [Source:HGNC Symbol;Acc:HGNC:25613]	CWF19L1	35.3236	35.3698	34.5258	32.8609	34.4395	33.2788	37.2852	33.1107	31.6929	35.5923	34.1951	37.2406	31.2412	34.4245	32.4143	36.4731	36.3153	33.1723
1458	ENSG00000095539	protein_coding	semaphorin 4G [Source:HGNC Symbol;Acc:HGNC:10735]	SEMA4G	13.7191	13.3632	15.1824	14.4958	13.6413	12.8025	13.2427	14.1614	14.9143	13.7732	13.8792	13.2025	16.6177	16.5586	18.0987	17.8881	19.1983	17.144
1459	ENSG00000095564	protein_coding	B-TFIID TATA-box binding protein associated factor 1 [Source:HGNC Symbol;Acc:HGNC:17307]	BTAF1	117.702	114.81	116.117	110.884	119.506	113.487	116.87	113.089	115.663	115.595	120.756	114.878	123.746	128.22	132.838	125.507	134.94	131.983
1460	ENSG00000095574	protein_coding	IKAROS family zinc finger 5 [Source:HGNC Symbol;Acc:HGNC:14283]	IKZF5	31.7976	27.5793	30.4772	28.2985	30.2126	31.235	28.7353	30.2784	29.5956	29.8648	28.0936	30.5604	29.4686	31.4832	30.1788	29.5037	27.9904	30.7922
1461	ENSG00000095637	protein_coding	sorbin and SH3 domain containing 1 [Source:HGNC Symbol;Acc:HGNC:14565]	SORBS1	32.9516	32.2422	28.6215	30.3776	28.5795	30.0782	32.1424	31.8294	29.0518	30.5012	29.4346	32.8748	29.9672	28.5419	28.1153	27.7033	28.1603	29.565
1462	ENSG00000095713	protein_coding	cartilage acidic protein 1 [Source:HGNC Symbol;Acc:HGNC:14882]	CRTAC1	18.0785	19.8457	19.3997	20.5597	18.2044	18.5097	16.1355	22.3211	21.9831	19.0916	18.6397	18.6729	10.3029	11.8198	9.1998	11.2672	9.38677	11.2682
1463	ENSG00000095739	protein_coding	BMP and activin membrane bound inhibitor [Source:HGNC Symbol;Acc:HGNC:30251]	BAMBI	27.9511	27.5225	23.5045	27.6055	24.3526	26.6848	24.4925	26.8392	27.3429	27.2283	25.948	27.9305	23.5971	24.8924	21.4949	22.0116	20.7274	20.1191
1464	ENSG00000095752	protein_coding	interleukin 11 [Source:HGNC Symbol;Acc:HGNC:5966]	IL11	2.17968	1.30789	1.74316	2.07907	2.16148	1.88953	1.6714	2.09049	2.09732	2.36373	1.20689	2.15659	1.4402	1.96089	1.84856	1.91658	1.95381	1.89662
1465	ENSG00000095787	protein_coding	WW domain containing adaptor with coiled-coil [Source:HGNC Symbol;Acc:HGNC:17327]	WAC	230.597	234.396	234.314	223.154	229.453	223.697	228.211	229.347	227.443	224.69	227.23	232.175	228.327	244.893	231.285	240.56	230.507	232.541
1466	ENSG00000095794	protein_coding	cAMP responsive element modulator [Source:HGNC Symbol;Acc:HGNC:2352]	CREM	13.7191	13.0789	13.2143	12.5899	13.5933	12.3783	14.1427	13.2173	14.7589	12.955	13.2757	13.7811	12.1309	11.9288	12.2091	13.6484	11.3831	11.0078
1467	ENSG00000095906	protein_coding	nucleotide binding protein 2 [Source:HGNC Symbol;Acc:HGNC:8042]	NUBP2	59.1077	60.2765	58.3115	66.5881	60.2331	61.0047	55.2849	63.5914	62.9974	58.2749	61.6182	68.6426	52.9549	47.0614	48.9653	47.3337	56.9153	53.2913
1468	ENSG00000095951	protein_coding	HIVEP zinc finger 1 [Source:HGNC Symbol;Acc:HGNC:4920]	HIVEP1	44.7475	43.2171	43.7477	43.5451	47.4084	42.5336	44.4208	40.1914	39.9268	44.0926	44.8559	45.3936	47.4157	46.6801	46.128	42.8617	41.5397	41.6513
1469	ENSG00000096060	protein_coding	FKBP prolyl isomerase 5 [Source:HGNC Symbol;Acc:HGNC:3721]	FKBP5	64.3004	68.6355	64.1033	61.7369	64.9404	62.0073	68.849	65.2773	70.7652	65.5025	62.8251	63.3827	53.7304	60.6242	55.8866	59.4139	55.1738	57.2333
1470	ENSG00000096063	protein_coding	SRSF protein kinase 1 [Source:HGNC Symbol;Acc:HGNC:11305]	SRPK1	182.259	183.331	183.313	180.533	183.677	180.238	192.083	184.435	178.972	181.643	178.15	178.366	176.923	181.273	168.262	179.694	173.337	175.865
1471	ENSG00000096070	protein_coding	bromodomain and PHD finger containing 3 [Source:HGNC Symbol;Acc:HGNC:14256]	BRPF3	68.0187	66.361	63.5972	64.2203	65.7569	66.0949	66.4705	69.3908	67.3474	66.2752	63.6297	72.2194	57.3309	59.3714	56.2735	58.6589	59.8885	57.4936
1472	ENSG00000096080	protein_coding	mitochondrial ribosomal protein S18A [Source:HGNC Symbol;Acc:HGNC:14515]	MRPS18A	15.3859	17.9123	14.62	17.2101	15.4185	18.8953	15.7498	17.196	17.0116	15.9551	16.0918	17.4105	16.8392	15.5782	16.4651	17.7719	15.8428	17.0324
1473	ENSG00000096092	protein_coding	transmembrane protein 14A [Source:HGNC Symbol;Acc:HGNC:21076]	TMEM14A	38.529	34.858	31.658	38.7516	32.5182	36.1324	35.9995	32.6386	40.1599	34.3649	40.2966	37.6614	32.9029	35.296	31.2535	32.4657	30.7937	33.5442
1474	ENSG00000096093	protein_coding	EF-hand domain containing 1 [Source:HGNC Symbol;Acc:HGNC:16406]	EFHC1	43.4012	44.1838	41.3297	44.2958	45.1989	43.7291	46.3493	45.7211	41.7134	42.8653	45.1241	45.3936	49.5206	50.6019	49.8251	46.9271	49.2699	47.1924
1475	ENSG00000096384	protein_coding	heat shock protein 90 alpha family class B member 1 [Source:HGNC Symbol;Acc:HGNC:5258]	HSP90AB1	1594.69	1588.74	1568.67	1589.86	1586.48	1626.61	1641.45	1627.55	1581.69	1564.65	1617.7	1586.04	1540.95	1463.75	1457.74	1476.99	1533.31	1511.79
1476	ENSG00000096401	protein_coding	cell division cycle 5 like [Source:HGNC Symbol;Acc:HGNC:1743]	CDC5L	156.552	162.007	149.855	143.456	157.932	149.427	150.041	138.31	134.306	154.506	160.315	148.121	143.687	146.958	144.016	148.332	144.284	144.18
1477	ENSG00000096654	protein_coding	zinc finger protein 184 [Source:HGNC Symbol;Acc:HGNC:12975]	ZNF184	24.6816	23.9969	24.4042	21.9458	22.7676	23.6769	24.6854	22.3211	21.0509	22.5918	25.881	22.4601	21.4922	21.1885	25.106	24.2186	25.1871	25.1023
1478	ENSG00000096717	protein_coding	sirtuin 1 [Source:HGNC Symbol;Acc:HGNC:14929]	SIRT1	69.3009	70.1709	67.3084	66.3571	68.1105	67.1746	67.5633	63.996	64.7063	69.8663	67.7868	64.1717	66.526	68.5767	64.7425	63.0148	67.279	69.3196
1479	ENSG00000096746	protein_coding	heterogeneous nuclear ribonucleoprotein H3 [Source:HGNC Symbol;Acc:HGNC:5043]	HNRNPH3	347.722	345.339	349.981	325.029	347.662	331.091	353.309	338.862	334.407	347.968	339.872	330.168	346.7	332.589	354.192	354.799	339.283	344.33
1480	ENSG00000096872	protein_coding	intraflagellar transport 74 [Source:HGNC Symbol;Acc:HGNC:21424]	IFT74	22.3737	24.8498	24.2918	23.2163	26.0338	22.6743	22.6282	21.1747	21.4393	24.2282	24.2718	22.9861	26.2559	28.4329	31.0386	26.5417	26.8861	27.1477
1481	ENSG00000096968	protein_coding	Janus kinase 2 [Source:HGNC Symbol;Acc:HGNC:6192]	JAK2	13.7191	15.4103	13.3267	11.6659	14.2177	14.3835	17.614	14.9032	13.7491	14.046	15.019	13.1499	11.3	13.3994	12.2091	10.3379	12.9971	12.1607
1482	ENSG00000097007	protein_coding	ABL proto-oncogene 1, non-receptor tyrosine kinase [Source:HGNC Symbol;Acc:HGNC:76]	ABL1	163.091	163.258	151.486	168.289	158.22	164.235	153.576	169.532	166.077	161.097	161.991	172.843	168.115	160.684	160.868	161.806	167.22	159.948
1483	ENSG00000097021	protein_coding	acyl-CoA thioesterase 7 [Source:HGNC Symbol;Acc:HGNC:24157]	ACOT7	126.806	129.026	120.559	136.41	133.435	137.588	122.591	129.813	129.49	131.823	134.031	137.548	107.849	112.261	100.94	108.258	111.112	109.707
1484	ENSG00000097033	protein_coding	SH3 domain containing GRB2 like, endophilin B1 [Source:HGNC Symbol;Acc:HGNC:10833]	SH3GLB1	86.61	84.7851	86.4832	83.1052	85.7386	82.1752	82.4131	82.1361	85.7572	84.9123	88.505	84.7381	82.7005	81.9217	85.2486	79.2767	80.4884	79.6953
1485	ENSG00000097046	protein_coding	cell division cycle 7 [Source:HGNC Symbol;Acc:HGNC:1745]	CDC7	78.0196	76.7672	80.0166	71.5548	77.0446	75.4268	82.1559	75.932	76.5135	79.1394	80.7272	71.9038	67.7446	71.8449	71.5779	73.4689	73.5226	74.0054
1486	ENSG00000099194	protein_coding	stearoyl-CoA desaturase [Source:HGNC Symbol;Acc:HGNC:10571]	SCD	477.862	469.645	507.99	513.647	499.733	540.598	492.743	464.763	489.686	480.291	503.271	503.222	528.497	527.48	532.041	494.652	537.042	517.294
1487	ENSG00000099203	protein_coding	transmembrane p24 trafficking protein 1 [Source:HGNC Symbol;Acc:HGNC:17291]	TMED1	10.1932	9.89444	8.88449	12.0124	9.12623	10.8744	10.5427	10.4525	10.875	9.7731	9.72214	10.9407	8.14265	7.29887	8.12506	9.58289	9.68409	9.03684
1488	ENSG00000099204	protein_coding	actin binding LIM protein 1 [Source:HGNC Symbol;Acc:HGNC:78]	ABLIM1	177.708	170.992	175.047	172.563	178.346	181.009	174.019	173.174	174.311	169.143	172.451	179.944	204.563	199.139	202.138	182.888	198.227	198.662
1489	ENSG00000099219	protein_coding	endoplasmic reticulum metallopeptidase 1 [Source:HGNC Symbol;Acc:HGNC:23703]	ERMP1	11.7959	13.5906	13.2143	11.4349	12.2964	14.2679	14.5284	13.3522	12.1955	13.546	13.678	12.5713	14.7897	12.0922	13.7137	13.1837	13.8041	12.7185
1490	ENSG00000099246	protein_coding	RAB18, member RAS oncogene family [Source:HGNC Symbol;Acc:HGNC:14244]	RAB18	68.8521	65.2805	66.1838	64.509	66.3814	64.8609	68.0133	63.5914	63.9295	68.5026	67.3174	64.4347	61.4853	66.2345	61.9482	66.7318	64.688	66.9396
1491	ENSG00000099282	protein_coding	tetraspanin 15 [Source:HGNC Symbol;Acc:HGNC:23298]	TSPAN15	8.91103	10.0082	7.87233	10.4531	8.9341	10.5659	9.96414	10.4525	10.642	10.0458	9.31984	10.1517	8.53039	9.15082	10.4035	9.98944	9.47172	8.5162
1492	ENSG00000099284	protein_coding	macroH2A.2 histone [Source:HGNC Symbol;Acc:HGNC:14453]	MACROH2A2	151.231	151.374	143.67	142.532	137.95	146.188	147.212	152.066	144.56	145.778	148.38	144.86	138.647	142.546	140.49	150.364	140.632	143.771
1493	ENSG00000099290	protein_coding	WASH complex subunit 2A [Source:HGNC Symbol;Acc:HGNC:23416]	WASHC2A	27.2459	26.3283	26.6535	25.1799	25.7456	26.1063	25.0068	27.8507	24.0027	25.6828	26.8867	26.5629	29.9118	26.6354	29.6199	27.2386	27.9055	27.6312
1494	ENSG00000099308	protein_coding	microtubule associated serine/threonine kinase 3 [Source:HGNC Symbol;Acc:HGNC:19036]	MAST3	30.9001	29.7402	31.9392	33.3229	29.9725	32.739	32.3995	36.7522	33.0911	33.1376	28.563	29.9818	25.3696	29.4678	27.3845	26.4836	25.5694	24.6933
1495	ENSG00000099326	protein_coding	myeloid zinc finger 1 [Source:HGNC Symbol;Acc:HGNC:13108]	MZF1	43.5935	44.1269	53.5881	51.3416	47.1202	45.85	45.835	49.9695	46.6072	48.3655	39.2908	49.0229	48.302	49.1857	50.6419	49.8891	50.5866	51.6178
1496	ENSG00000099330	protein_coding	occludin/ELL domain containing 1 [Source:HGNC Symbol;Acc:HGNC:26221]	OCEL1	4.87222	5.51586	5.28571	4.79342	5.52377	5.74571	5.01421	5.39482	5.28215	5.18201	5.96738	4.99697	4.9853	6.80865	6.19052	4.87856	4.84205	5.20641
1497	ENSG00000099331	protein_coding	myosin IXB [Source:HGNC Symbol;Acc:HGNC:7609]	MYO9B	143.923	150.179	150.643	147.557	142.273	143.218	143.226	157.057	152.25	148.506	143.888	150.067	139.422	136.227	140.834	140.259	135.62	133.507
1498	ENSG00000099338	protein_coding	cation channel sperm associated auxiliary subunit gamma [Source:HGNC Symbol;Acc:HGNC:25243]	CATSPERG	2.11557	2.21772	2.64285	2.07907	2.73787	2.46795	2.57139	2.22536	1.94197	2.31827	2.21262	2.36699	3.37892	3.48603	3.13825	3.77508	3.39793	2.78915
1499	ENSG00000099341	protein_coding	proteasome 26S subunit, non-ATPase 8 [Source:HGNC Symbol;Acc:HGNC:9566]	PSMD8	120.78	120.325	115.105	120.24	121.331	121.47	118.348	118.012	116.207	119.277	119.348	119.77	105.577	102.184	102.831	106.806	106.313	104.426
1500	ENSG00000099364	protein_coding	F-box and leucine rich repeat protein 19 [Source:HGNC Symbol;Acc:HGNC:25300]	FBXL19	88.2769	80.9752	75.0121	91.0172	76.7564	88.5764	75.0846	82.743	85.9126	81.8667	79.7886	87.4207	78.2137	81.5948	76.9086	72.83	75.3915	74.9351
1501	ENSG00000099365	protein_coding	syntaxin 1B [Source:HGNC Symbol;Acc:HGNC:18539]	STX1B	23.8482	24.1674	24.4605	25.0066	23.0558	22.173	19.864	22.4559	20.3518	21.6826	18.3044	22.7231	22.6554	23.3673	22.5696	25.0317	22.4688	22.5735
1502	ENSG00000099381	protein_coding	SET domain containing 1A, histone lysine methyltransferase [Source:HGNC Symbol;Acc:HGNC:29010]	SETD1A	77.7631	77.1084	82.8282	80.3331	74.5469	78.9745	73.9275	73.7741	79.3099	72.5027	77.71	79.8464	76.7735	76.2024	77.2095	83.4002	75.5614	75.6417
1503	ENSG00000099385	protein_coding	BAF chromatin remodeling complex subunit BCL7C [Source:HGNC Symbol;Acc:HGNC:1006]	BCL7C	30.9001	30.1382	25.6975	27.721	26.5621	27.4945	25.3925	29.8738	29.1295	26.5465	26.6185	27.7727	23.0431	23.1494	22.5266	24.2186	23.5306	23.652
1504	ENSG00000099617	protein_coding	ephrin A2 [Source:HGNC Symbol;Acc:HGNC:3222]	EFNA2	17.6938	16.377	16.9255	16.1706	15.6587	16.1959	15.1069	16.9937	17.3223	16.5915	14.952	17.1475	19.498	17.3212	17.9267	14.5195	16.7348	16.4002
1505	ENSG00000099622	protein_coding	cold inducible RNA binding protein [Source:HGNC Symbol;Acc:HGNC:1982]	CIRBP	236.046	239.855	248.541	252.607	245.88	250.922	252.961	260.57	258.748	255.601	262.431	255.95	285.824	280.843	274.876	301.251	305.559	309.261
1506	ENSG00000099624	protein_coding	ATP synthase F1 subunit delta [Source:HGNC Symbol;Acc:HGNC:837]	ATP5F1D	47.0553	45.6054	41.2735	52.1501	42.8453	48.5107	44.3565	42.8888	50.4134	45.4108	43.649	50.2853	42.098	41.1242	38.9917	36.7054	40.2654	41.4653
1507	ENSG00000099625	protein_coding	CACN subunit beta associated regulatory protein [Source:HGNC Symbol;Acc:HGNC:28617]	CBARP	25.1304	23.5988	25.6975	27.8942	23.1038	26.2606	22.564	25.4905	22.9152	23.4554	21.4557	25.0901	22.9878	26.2541	20.6781	20.037	21.2795	23.0198
1508	ENSG00000099783	protein_coding	heterogeneous nuclear ribonucleoprotein M [Source:HGNC Symbol;Acc:HGNC:5046]	HNRNPM	440.936	438.767	425.162	422.11	412.17	423.023	434.115	432.125	441.836	415.425	424.824	419.115	377.331	378.942	383.081	392.841	384.306	374.415
1509	ENSG00000099785	protein_coding	membrane associated ring-CH-type finger 2 [Source:HGNC Symbol;Acc:HGNC:28038]	MARCHF2	10.2573	9.32579	6.97264	10.8574	9.2223	8.6764	8.67844	8.15966	10.0205	8.50032	7.50951	9.57315	9.1951	8.82401	7.5232	9.2925	9.3443	8.96246
1510	ENSG00000099795	protein_coding	NADH:ubiquinone oxidoreductase subunit B7 [Source:HGNC Symbol;Acc:HGNC:7702]	NDUFB7	40.6445	42.2504	36.1565	42.2168	40.3956	42.0709	40.5637	41.3378	43.3447	40.4561	39.0897	39.9758	36.5034	35.9497	35.3376	38.1573	36.1454	39.9406
1511	ENSG00000099797	protein_coding	trans-2,3-enoyl-CoA reductase [Source:HGNC Symbol;Acc:HGNC:4551]	TECR	35.1312	36.2227	34.6383	40.6574	33.3348	41.3768	33.0424	34.7291	39.7715	38.2287	39.8272	39.818	35.3402	36.8212	35.0366	38.7381	34.7438	38.0068
1512	ENSG00000099800	protein_coding	translocase of inner mitochondrial membrane 13 [Source:HGNC Symbol;Acc:HGNC:11816]	TIMM13	56.9921	58.7411	58.3115	65.2598	57.8795	64.6295	58.4349	62.3776	64.551	61.5023	60.1431	64.4347	54.8936	56.4301	53.3073	57.265	58.6142	56.8614
1513	ENSG00000099804	protein_coding	cell division cycle 34, ubiqiutin conjugating enzyme [Source:HGNC Symbol;Acc:HGNC:1734]	CDC34	45.5168	44.8093	42.4544	43.0253	38.8585	41.9938	41.3351	42.6865	44.1215	39.7742	42.4421	41.0804	39.4392	38.4008	36.4983	37.6927	37.5471	37.3374
1514	ENSG00000099810	protein_coding	methylthioadenosine phosphorylase [Source:HGNC Symbol;Acc:HGNC:7413]	MTAP	98.6624	95.5894	97.1671	93.7893	96.2578	88.5378	102.663	95.6906	97.5644	94.8218	98.2271	90.4715	92.7265	89.4929	92.4279	89.6727	85.7552	88.4718
1515	ENSG00000099814	protein_coding	centrosomal protein 170B [Source:HGNC Symbol;Acc:HGNC:20362]	CEP170B	47.1195	49.6996	44.6474	50.1288	42.3169	43.8062	42.2994	45.7885	45.7527	43.138	41.4364	45.7618	37.4451	38.0195	41.5711	38.68	42.5166	38.1556
1516	ENSG00000099817	protein_coding	RNA polymerase II, I and III subunit E [Source:HGNC Symbol;Acc:HGNC:9192]	POLR2E	91.354	88.7087	81.2537	104.993	90.8301	94.9777	83.1202	97.6462	100.516	88.5033	91.9915	96.3101	83.199	81.9761	75.7049	80.9029	82.9519	82.6704
1517	ENSG00000099821	protein_coding	RNA polymerase mitochondrial [Source:HGNC Symbol;Acc:HGNC:9200]	POLRMT	45.9655	45.4348	46.0531	52.2079	43.3256	48.0094	43.0065	44.9793	50.3358	45.2744	45.6605	51.2321	39.9931	37.5293	37.788	38.68	42.3891	39.6059
1518	ENSG00000099822	protein_coding	hyperpolarization activated cyclic nucleotide gated potassium and sodium channel 2 [Source:HGNC Symbol;Acc:HGNC:4846]	HCN2	20.8992	20.4144	19.3997	21.657	17.532	20.5149	17.8712	20.9724	20.8956	16.5006	16.6282	18.1469	16.0637	16.6131	14.5735	15.0422	14.5261	15.9911
1519	ENSG00000099849	protein_coding	Ras association domain family member 7 [Source:HGNC Symbol;Acc:HGNC:1166]	RASSF7	5.83384	5.97078	5.73556	7.39226	6.62853	5.59146	5.27135	7.14813	5.74822	5.90931	4.29115	5.25997	5.09608	4.2486	4.21299	3.65892	3.82267	4.09075
1520	ENSG00000099864	protein_coding	paralemmin [Source:HGNC Symbol;Acc:HGNC:8594]	PALM	98.2136	100.593	94.3555	100.72	93.5199	98.4868	90.1273	97.7811	102.613	91.2762	90.8517	100.308	99.2074	94.0138	90.9233	91.1827	91.3193	92.1163
1521	ENSG00000099875	protein_coding	MAPK interacting serine/threonine kinase 2 [Source:HGNC Symbol;Acc:HGNC:7111]	MKNK2	47.1836	44.1269	43.0167	44.1226	43.0374	45.9656	41.078	46.5977	46.6072	42.9107	41.4364	47.4449	45.1446	47.3882	49.7821	41.1774	44.9801	46.0024
1522	ENSG00000099889	protein_coding	ARVCF delta catenin family member [Source:HGNC Symbol;Acc:HGNC:728]	ARVCF	58.0819	60.9588	55.8936	64.278	55.4779	58.2668	54.5778	62.6473	61.7545	55.4112	53.7735	57.0181	43.0951	46.6256	45.87	44.604	44.2155	43.6223
1523	ENSG00000099899	protein_coding	tRNA methyltransferase 2 homolog A [Source:HGNC Symbol;Acc:HGNC:24974]	TRMT2A	28.5922	28.6029	30.8708	33.1497	30.8851	31.6592	28.1567	29.8738	28.7411	31.9558	30.4403	33.5586	25.3142	27.6703	28.8461	26.7159	28.9249	28.6353
1524	ENSG00000099901	protein_coding	RAN binding protein 1 [Source:HGNC Symbol;Acc:HGNC:9847]	RANBP1	239.7	230.358	237.969	236.495	237.955	238.003	237.597	240.811	247.873	235.918	232.393	229.335	200.852	196.47	195.259	220.755	192.238	199.963
1525	ENSG00000099904	protein_coding	zinc finger DHHC-type palmitoyltransferase 8 [Source:HGNC Symbol;Acc:HGNC:18474]	ZDHHC8	48.658	46.2309	52.4072	54.4024	48.321	49.5133	40.8851	48.8231	48.3161	46.82	41.5705	49.3911	45.5878	42.3226	45.5691	41.0032	43.7483	43.2876
1526	ENSG00000099910	protein_coding	kelch like family member 22 [Source:HGNC Symbol;Acc:HGNC:25888]	KLHL22	31.2848	32.9246	33.3449	33.5539	32.5182	32.2762	30.2138	30.7505	34.1786	32.1376	32.8541	34.9262	26.3113	28.4874	28.3302	25.6705	26.4614	29.2303
1527	ENSG00000099917	protein_coding	mediator complex subunit 15 [Source:HGNC Symbol;Acc:HGNC:14248]	MED15	66.6083	62.4373	67.8707	69.9955	65.2286	70.7609	63.8991	66.1539	65.4054	67.4116	63.6297	68.1692	69.7387	71.5725	72.2227	76.1404	72.8431	68.4643
1528	ENSG00000099940	protein_coding	synaptosome associated protein 29 [Source:HGNC Symbol;Acc:HGNC:11133]	SNAP29	36.5416	41.0562	39.193	37.1923	38.7144	36.8265	40.1137	41.4727	41.2474	38.1833	37.2794	37.714	38.8853	36.1131	37.0142	35.6019	34.7438	35.7011
1529	ENSG00000099942	protein_coding	CRK like proto-oncogene, adaptor protein [Source:HGNC Symbol;Acc:HGNC:2363]	CRKL	150.269	157.799	149.743	149.751	147.893	156.175	151.005	152.269	148.988	148.051	143.217	148.331	160.803	156.817	150.722	150.016	151.165	156.044
1530	ENSG00000099949	protein_coding	leucine zipper like transcription regulator 1 [Source:HGNC Symbol;Acc:HGNC:6742]	LZTR1	13.0781	14.5573	17.5441	16.8058	14.7461	16.0031	16.9712	13.6219	13.9045	16.637	15.7566	16.6215	14.7343	15.3603	16.852	17.1331	15.588	16.0655
1531	ENSG00000099953	protein_coding	matrix metallopeptidase 11 [Source:HGNC Symbol;Acc:HGNC:7157]	MMP11	7.30832	7.2218	8.09726	8.66281	8.16558	7.40386	6.36419	7.55274	8.85537	7.54574	6.10148	8.62635	9.13971	9.96786	7.43722	8.53749	9.38677	9.89218
1532	ENSG00000099956	protein_coding	SWI/SNF related, matrix associated, actin dependent regulator of chromatin, subfamily b, member 1 [Source:HGNC Symbol;Acc:HGNC:11103]	SMARCB1	123.408	127.32	120.053	124.571	122.34	123.359	125.098	121.923	128.714	123.732	122.7	128.554	128.344	123.482	120.844	133.347	121.009	126.144
1533	ENSG00000099957	protein_coding	purinergic receptor P2X 6 [Source:HGNC Symbol;Acc:HGNC:8538]	P2RX6	2.88486	3.92366	4.61094	3.98489	3.41033	3.62481	3.08567	4.24842	3.72857	3.86378	2.88312	3.36638	3.5451	3.64944	4.21299	4.12355	3.82267	3.08666
1534	ENSG00000099968	protein_coding	BCL2 like 13 [Source:HGNC Symbol;Acc:HGNC:17164]	BCL2L13	55.3894	52.6566	50.158	51.2261	48.6572	54.7192	53.8706	52.5995	52.0447	54.5021	51.6949	51.9159	57.3863	54.4692	56.2306	54.0708	57.425	52.9566
1535	ENSG00000099991	protein_coding	calcineurin binding protein 1 [Source:HGNC Symbol;Acc:HGNC:24187]	CABIN1	101.291	104.005	99.4163	104.647	97.0263	101.687	90.7701	105.671	103.623	98.9583	99.7692	99.4661	100.26	101.803	99.0483	101.404	101.088	100.893
1536	ENSG00000099992	protein_coding	TBC1 domain family member 10A [Source:HGNC Symbol;Acc:HGNC:23609]	TBC1D10A	2.30789	2.78636	2.19301	2.94535	2.93	2.19802	1.99283	2.69741	2.175	2.81829	2.68197	2.73519	2.54804	2.66899	2.96629	1.91658	2.54845	2.45445
1537	ENSG00000099995	protein_coding	splicing factor 3a subunit 1 [Source:HGNC Symbol;Acc:HGNC:10765]	SF3A1	192.324	195.785	190.117	193.181	181.468	195.585	191.697	197.585	185.963	186.871	198.6	192.199	171.494	165.151	172.604	173.537	166.626	169.506
1538	ENSG00000099999	protein_coding	ring finger protein 215 [Source:HGNC Symbol;Acc:HGNC:33434]	RNF215	15.2577	14.7279	14.9012	15.3043	16.6674	15.579	14.1427	15.3078	13.7491	15.546	13.8792	16.5689	13.9588	14.4888	13.8857	16.6103	14.3987	14.1689
1539	ENSG00000100003	protein_coding	SEC14 like lipid binding 2 [Source:HGNC Symbol;Acc:HGNC:10699]	SEC14L2	3.78238	2.95696	3.20516	3.98489	3.12213	3.62481	2.37854	4.11355	3.57322	4.00015	3.75476	2.99818	4.87451	4.13966	4.64289	4.47202	4.33236	4.76015
1540	ENSG00000100014	protein_coding	sperm antigen with calponin homology and coiled-coil domains 1 like [Source:HGNC Symbol;Acc:HGNC:29022]	SPECC1L	55.1971	59.8215	57.0744	57.1168	55.622	55.8375	57.1492	54.4877	54.4527	57.184	55.7179	59.4903	53.952	52.5083	50.9428	50.2376	54.5367	53.6632
1541	ENSG00000100023	protein_coding	peptidylprolyl isomerase like 2 [Source:HGNC Symbol;Acc:HGNC:9261]	PPIL2	73.6602	74.6632	78.7233	77.9653	75.7958	75.504	75.7918	78.2248	74.8822	77.7757	70.6699	78.847	79.5432	75.7666	82.7552	80.4963	76.6233	83.6745
1542	ENSG00000100027	protein_coding	yippee like 1 [Source:HGNC Symbol;Acc:HGNC:12845]	YPEL1	43.9782	48.1643	51.1139	49.147	47.7927	52.097	44.1636	50.4415	51.0349	44.729	47.0685	48.8651	71.1235	69.3937	66.4621	69.1711	64.773	67.609
1543	ENSG00000100028	protein_coding	small nuclear ribonucleoprotein D3 polypeptide [Source:HGNC Symbol;Acc:HGNC:11160]	SNRPD3	98.47	94.4521	93.3434	93.9048	96.4979	97.6384	100.67	92.7234	98.3412	99.7765	100.306	93.4171	86.024	92.3797	86.1514	92.9831	84.9907	84.2695
1544	ENSG00000100029	protein_coding	pescadillo ribosomal biogenesis factor 1 [Source:HGNC Symbol;Acc:HGNC:8848]	PES1	91.7387	85.0694	87.1017	90.9595	89.1489	92.047	89.8058	91.7119	92.1269	89.9579	91.3881	90.1033	91.3417	87.4775	85.2486	88.6853	91.5741	88.0999
1545	ENSG00000100030	protein_coding	mitogen-activated protein kinase 1 [Source:HGNC Symbol;Acc:HGNC:6871]	MAPK1	107.766	104.005	105.096	101.817	101.541	104.155	104.591	105.941	115.663	104.095	105.871	108.198	104.248	100.005	99.1343	97.9778	100.111	99.0334
1546	ENSG00000100034	protein_coding	protein phosphatase, Mg2+/Mn2+ dependent 1F [Source:HGNC Symbol;Acc:HGNC:19388]	PPM1F	67.9546	64.0295	61.6853	63.354	58.552	65.9021	60.1706	65.9516	66.4929	66.0025	60.5454	61.6995	51.2378	49.8938	51.1578	49.831	51.4786	48.3452
1547	ENSG00000100036	protein_coding	solute carrier family 35 member E4 [Source:HGNC Symbol;Acc:HGNC:17058]	SLC35E4	5.00043	5.57273	5.22948	6.29497	5.52377	6.5555	5.52849	6.06917	6.68036	5.50021	5.29689	5.94377	5.09608	4.35754	4.72887	6.09821	5.01194	4.83452
1548	ENSG00000100038	protein_coding	DNA topoisomerase III beta [Source:HGNC Symbol;Acc:HGNC:11993]	TOP3B	27.5024	30.8206	33.3449	28.9915	30.741	29.3841	28.221	30.2784	29.0518	28.5465	27.0208	30.6656	27.6407	27.8882	31.2965	32.0591	33.2572	31.6103
1549	ENSG00000100056	protein_coding	ess-2 splicing factor homolog [Source:HGNC Symbol;Acc:HGNC:16817]	ESS2	19.8735	20.0732	18.4437	21.2528	18.5407	20.5534	18.4497	21.5793	20.4295	19.4098	18.8408	21.9867	19.2765	18.7374	18.3566	18.7012	17.7966	18.8546
1550	ENSG00000100065	protein_coding	caspase recruitment domain family member 10 [Source:HGNC Symbol;Acc:HGNC:16422]	CARD10	5.44919	6.53943	6.07294	6.58373	6.4364	4.97447	5.46421	5.9343	7.61251	5.59112	5.56508	5.73337	5.37304	5.55586	6.23351	6.3886	6.8808	6.06175
1551	ENSG00000100068	transcribed_unprocessed_pseudogene	LDL receptor related protein 5 like [Source:HGNC Symbol;Acc:HGNC:25323]	LRP5L	12.2446	10.4631	12.1459	12.0702	9.55853	11.0672	10.9284	11.6663	11.4964	10.955	9.52099	11.7823	12.0755	12.0377	11.9082	13.0676	11.0008	12.3838
1552	ENSG00000100075	protein_coding	solute carrier family 25 member 1 [Source:HGNC Symbol;Acc:HGNC:10979]	SLC25A1	46.9912	45.0367	42.4544	50.7641	47.8407	49.5519	42.3637	46.4629	48.2384	43.3653	45.1912	50.6009	48.1912	48.9133	45.0962	45.7075	49.6097	48.0477
1553	ENSG00000100077	protein_coding	G protein-coupled receptor kinase 3 [Source:HGNC Symbol;Acc:HGNC:290]	GRK3	578.191	580.644	561.241	566.201	569.285	569.519	576.699	561.803	567.753	561.158	527.476	548.089	535.864	546.707	505.129	589.319	524.045	535.777
1554	ENSG00000100083	protein_coding	golgi associated, gamma adaptin ear containing, ARF binding protein 1 [Source:HGNC Symbol;Acc:HGNC:17842]	GGA1	80.1351	77.9613	85.471	90.2665	81.0314	80.8641	77.656	80.8548	79.6983	82.7304	76.1009	87.6311	83.753	93.5236	87.3551	89.7888	93.9527	91.4841
1555	ENSG00000100084	protein_coding	histone cell cycle regulator [Source:HGNC Symbol;Acc:HGNC:4916]	HIRA	21.6044	21.3811	19.9058	18.4807	18.1084	19.7822	19.0926	20.0283	21.1286	20.4099	17.1646	17.0423	16.5069	18.9553	19.2594	20.792	16.6074	18.2224
1556	ENSG00000100092	protein_coding	SH3 domain binding protein 1 [Source:HGNC Symbol;Acc:HGNC:10824]	SH3BP1	4.67989	4.54917	4.49848	5.48645	4.80328	5.28296	4.30708	5.73199	4.11697	5.18201	5.09574	5.78597	3.98824	5.1201	4.55691	6.04013	4.79957	3.79324
1557	ENSG00000100095	protein_coding	seizure related 6 homolog like [Source:HGNC Symbol;Acc:HGNC:10763]	SEZ6L	187.901	181.455	178.027	183.247	176.425	180.353	171.319	183.019	181.302	181.734	171.914	179.207	173.156	171.36	159.148	164.245	160.977	163.593
1558	ENSG00000100097	protein_coding	galectin 1 [Source:HGNC Symbol;Acc:HGNC:6561]	LGALS1	30.5155	32.4128	27.9468	36.326	31.7977	32.2762	28.671	27.8507	32.7804	26.9556	32.72	33.1904	30.6319	26.0363	25.8368	24.3928	27.6082	27.7799
1559	ENSG00000100099	protein_coding	HPS4 biogenesis of lysosomal organelles complex 3 subunit 2 [Source:HGNC Symbol;Acc:HGNC:15844]	HPS4	62.7618	68.0669	65.4528	67.9742	68.9271	68.37	73.6704	69.1885	66.1045	66.0934	69.5971	66.3808	70.7912	75.3854	77.6824	70.7973	75.6039	76.3855
1560	ENSG00000100100	protein_coding	phosphoinositide-3-kinase interacting protein 1 [Source:HGNC Symbol;Acc:HGNC:24942]	PIK3IP1	1.47449	1.64907	2.19301	1.55931	2.20951	2.27515	2.37854	1.28127	1.55357	1.90916	1.40803	1.89359	3.32353	2.56005	3.22423	1.80042	3.4404	2.97509
1561	ENSG00000100104	protein_coding	SRR1 domain containing [Source:HGNC Symbol;Acc:HGNC:33910]	SRRD	30.9001	33.607	31.7705	31.0706	31.0292	32.9318	32.9138	30.683	32.7804	33.1376	31.0438	32.5592	33.4569	32.0824	30.1358	28.6906	30.6238	30.9038
1562	ENSG00000100105	protein_coding	POZ/BTB and AT hook containing zinc finger 1 [Source:HGNC Symbol;Acc:HGNC:13071]	PATZ1	92.3157	91.2676	88.4513	99.0448	88.1402	99.0652	98.6128	95.0836	100.128	91.2762	93.8689	93.1541	96.4378	96.3015	92.5999	92.8089	98.9222	97.0252
1563	ENSG00000100106	protein_coding	TRIO and F-actin binding protein [Source:HGNC Symbol;Acc:HGNC:17009]	TRIOBP	41.2856	42.9328	39.9802	41.5815	39.6271	39.8729	40.8851	41.3378	40.0045	40.5015	37.0782	39.1868	45.5878	45.3184	43.2477	44.3717	42.6015	44.3661
1564	ENSG00000100109	protein_coding	tuftelin interacting protein 11 [Source:HGNC Symbol;Acc:HGNC:17165]	TFIP11	44.5551	42.9896	43.2416	42.1012	41.3082	43.382	44.1636	43.9678	44.3545	42.638	41.9728	42.8162	40.7686	37.4748	42.3449	40.2482	42.6865	41.3166
1565	ENSG00000100116	protein_coding	glycine C-acetyltransferase [Source:HGNC Symbol;Acc:HGNC:4188]	GCAT	11.9241	12.9651	12.3146	12.4167	12.6326	14.962	12.407	14.4311	14.3705	12.8187	13.611	13.5181	11.0784	11.0572	9.71568	11.2672	10.3637	10.6731
1566	ENSG00000100124	protein_coding	ankyrin repeat domain 54 [Source:HGNC Symbol;Acc:HGNC:25185]	ANKRD54	25.5791	27.9205	27.3845	27.3745	25.0731	24.8723	27.7067	26.502	28.5857	26.1374	25.7469	28.246	24.0956	26.3631	23.3434	24.509	23.5731	22.3504
[truncated: 9,453 more rows]
