# Supplementary material for: Oxidative Stress and Its Modulation by Ladostigil Alter the Expression of Abundant Long Non-Coding RNAs in SH-SY5Y Cells
Source: Noncoding RNA. 2022 Oct 25;8(6):72. doi: 10.3390/ncrna8060072 (PMC9680243; doi:10.3390/ncrna8060072)
Supplement: Supplementary file 1 [file ncrna-08-00072-s001.zip › SH-ncRNA-Suppl Table S2 (sinlado, DE).xlsx]

## Sheet: Sheet1
Table S2. RNA-seq expressed (DE) genes; Sin1 treated vs Sin1/Ladostigil treated (24 hrs)
ensemblID	Description	Gene_type	gene_name	logFC	logCPM	LR	PValue	FDR	Trand
ENSG00000279088	TEC	TEC	AC022400.6	0.482321	2.63403	23.4248	1.29896e-06	0.00210908	Up
ENSG00000252690	lncRNA	TEC	AC105339.2	0.489822	2.79102	19.3357	1.09638e-05	0.0117359	Up
ENSG00000267784	lncRNA	novel transcript, antisense to titin	AC010680.1	1.4264	0.170111	16.6044	4.60429e-05	0.0299033	Up
ENSG00000234741	lncRNA	growth arrest specific 5 [Source:HGNC Symbol;Acc:HGNC:16355]	GAS5	0.152271	7.64666	16.4176	5.08119e-05	0.0319361	Unchanged
ENSG00000232956	lncRNA	small nucleolar RNA host gene 15 [Source:HGNC Symbol;Acc:HGNC:27797]	SNHG15	0.243193	4.82639	15.8551	6.83835e-05	0.0403753	Unchanged
ENSG00000269609	lncRNA	C10orf95 antisense RNA 1 [Source:HGNC Symbol;Acc:HGNC:45238]	RPARP-AS1	0.317095	3.88389	15.2187	9.57492e-05	0.047074	Up
ENSG00000203506	lncRNA	RBMS3 antisense RNA 2 [Source:HGNC Symbol;Acc:HGNC:39988]	RBMS3-AS2	0.403436	2.30477	13.6913	0.000215452	0.0825849	Unchanged
ENSG00000247627	processed_pseudogene	MT-ND4 pseudogene 12 [Source:HGNC Symbol;Acc:HGNC:42199]	MTND4P12	0.14619	7.87728	13.384	0.000253775	0.0915659	Unchanged
ENSG00000180385	transcribed_unprocessed_pseudogene	EMC3 antisense RNA 1 [Source:HGNC Symbol;Acc:HGNC:49223]	EMC3-AS1	0.246768	4.56331	11.5797	0.000666771	0.164448	Unchanged
ENSG00000233155	processed_pseudogene	high mobility group AT-hook 1 pseudogene 8 [Source:HGNC Symbol;Acc:HGNC:39183]	HMGA1P8	0.631418	0.992519	11.3216	0.000766113	0.177702	Unchanged
ENSG00000277782	lncRNA	novel transcript	AC068870.2	0.914419	-0.175271	11.2949	0.000777222	0.178158	Unchanged
ENSG00000232528	transcribed_unitary_pseudogene	pseudogene similar to F830045P16Rik	AL109809.1	-1.62669	-1.23255	10.8797	0.000972242	0.19529	Unchanged
ENSG00000163597	lncRNA	small nucleolar RNA host gene 16 [Source:HGNC Symbol;Acc:HGNC:44352]	SNHG16	0.317627	7.39669	10.8942	0.000964648	0.19529	Unchanged
ENSG00000230922	lncRNA	novel transcript	AL079301.1	1.07308	0.127946	10.6705	0.00108855	0.202075	Unchanged
ENSG00000232442	lncRNA	melanoma highly expressed competing endogenous lncRNA for miR-425 and miR-489 [Source:HGNC Symbol;Acc:HGNC:53110]	MHENCR	0.552639	1.23083	10.7525	0.00104137	0.202075	Unchanged
ENSG00000285994	lncRNA	novel transcript, sense intronic to CAMK1D	AL731559.1	1.72443	-1.10056	10.4957	0.00119655	0.215866	Unchanged
ENSG00000267108	lncRNA	novel transcript	AP001029.1	2.17501	-1.73622	10.4762	0.00120922	0.21615	Unchanged
ENSG00000224934	lncRNA	novel transcript	AL391684.1	0.374019	2.66707	10.429	0.00124049	0.217658	Unchanged
ENSG00000281912	lncRNA	long intergenic non-protein coding RNA 1144 [Source:HGNC Symbol;Acc:HGNC:49460]	LINC01144	0.852629	0.0442088	10.4386	0.00123407	0.217658	Unchanged
ENSG00000253230	lncRNA	MIR124-1 host gene [Source:HGNC Symbol;Acc:HGNC:27231]	MIR124-1HG	0.278361	4.33772	10.2833	0.00134242	0.221438	Unchanged
ENSG00000210151	Mt_tRNA	mitochondrially encoded tRNA-Ser (UCN) 1 [Source:HGNC Symbol;Acc:HGNC:7497]	MT-TS1	1.36918	-0.602701	10.2924	0.00133577	0.221438	Unchanged
ENSG00000268583	lncRNA	novel transcript, antisense to CARD8	AC011466.1	-1.47295	-1.15546	10.1136	0.00147176	0.225794	Unchanged
ENSG00000269399	lncRNA	novel transcript	AC008764.6	0.65823	1.1426	10.0578	0.00151702	0.228328	Unchanged
ENSG00000254363	lncRNA	novel transcript	AC011379.2	0.880865	0.272991	9.93839	0.00161867	0.238017	Unchanged
ENSG00000254694	lncRNA	novel transcript	AP001893.1	0.742758	0.311452	9.89843	0.0016542	0.238744	Unchanged
ENSG00000260167	lncRNA	novel transcript, antisense to ZNF689	AC093249.2	1.48929	-0.654124	9.88418	0.00166706	0.238831	Unchanged
ENSG00000227630	lncRNA	long intergenic non-protein coding RNA 1132 [Source:HGNC Symbol;Acc:HGNC:49444]	LINC01132	1.33666	-1.19403	9.80258	0.00174267	0.246765	Unchanged
ENSG00000273015	lncRNA	novel transcript	AC008124.1	0.173627	4.69493	9.77909	0.00176508	0.247416	Unchanged
ENSG00000265713	transcribed_processed_pseudogene	RNA terminal phosphate cyclase-like 1 (RCL1) pseudogene	AC023389.2	-0.973544	-0.217884	9.70666	0.00183601	0.255521	Unchanged
ENSG00000260257	lncRNA	novel transcript	AL035071.1	0.560796	2.38171	9.67336	0.00186959	0.256535	Unchanged
ENSG00000245694	lncRNA	colorectal neoplasia differentially expressed [Source:HGNC Symbol;Acc:HGNC:37078]	CRNDE	0.127768	6.74085	9.66832	0.00187473	0.256535	Unchanged
ENSG00000267519	lncRNA	miR-23a/27a/24-2 cluster host gene [Source:HGNC Symbol;Acc:HGNC:27620]	MIR23AHG	0.431045	2.77296	9.6113	0.00193384	0.261659	Unchanged
ENSG00000210049	Mt_tRNA	mitochondrially encoded tRNA-Phe (UUU/C) [Source:HGNC Symbol;Acc:HGNC:7481]	MT-TF	-1.09093	-0.539996	9.57372	0.00197382	0.262253	Unchanged
ENSG00000224328	lncRNA	MDC1 antisense RNA 1 [Source:HGNC Symbol;Acc:HGNC:39764]	MDC1-AS1	-1.7073	-1.44514	9.46505	0.00209424	0.268448	Unchanged
ENSG00000210196	Mt_tRNA	mitochondrially encoded tRNA-Pro (CCN) [Source:HGNC Symbol;Acc:HGNC:7494]	MT-TP	0.484888	1.96953	9.39782	0.00217243	0.276651	Unchanged
ENSG00000272606	lncRNA	PPP4R3B divergent transcript [Source:HGNC Symbol;Acc:HGNC:55209]	PPP4R3B-DT	0.921276	-0.0657541	9.27433	0.00232387	0.292119	Unchanged
ENSG00000237054	lncRNA	PRMT5 antisense RNA 1 [Source:HGNC Symbol;Acc:HGNC:40533]	PRMT5-AS1	-1.93554	-1.52768	9.25531	0.00234814	0.293276	Unchanged
ENSG00000275580	lncRNA	novel transcript, sense intronic to GALK2	AC022306.2	-0.967514	-0.383563	9.11136	0.00254027	0.310948	Unchanged
ENSG00000287166	lncRNA	novel transcript	AC104561.4	-0.904298	-0.394356	8.94739	0.00277866	0.315039	Unchanged
ENSG00000273192	lncRNA	novel transcript, antisense to ALG12	AL671710.1	0.55238	1.23752	8.84563	0.00293792	0.321586	Unchanged
ENSG00000261617	lncRNA	long intergenic non-protein coding RNA 2177 [Source:HGNC Symbol;Acc:HGNC:53039]	LINC02177	1.71496	-1.57726	8.85084	0.00292953	0.321586	Unchanged
ENSG00000249087	lncRNA	ZNF436 antisense RNA 1 [Source:HGNC Symbol;Acc:HGNC:25122]	ZNF436-AS1	0.408839	2.11114	8.82701	0.00296805	0.323069	Unchanged
ENSG00000157021	unprocessed_pseudogene	CIBAR1 pseudogene 1 [Source:HGNC Symbol;Acc:HGNC:32278]	CIBAR1P1	0.652768	0.947585	8.7487	0.00309823	0.333906	Unchanged
ENSG00000286996	lncRNA	novel transcript	AC099332.2	1.4225	-1.03047	8.65307	0.00326511	0.336586	Unchanged
ENSG00000210144	Mt_tRNA	mitochondrially encoded tRNA-Tyr (UAU/C) [Source:HGNC Symbol;Acc:HGNC:7502]	MT-TY	2.17557	-1.86804	8.64353	0.00328225	0.336586	Unchanged
ENSG00000257681	lncRNA	novel transcript, antisense to STAB2	AC025265.1	1.65452	-1.34603	8.60632	0.00334998	0.33697	Unchanged
ENSG00000280347	TEC	TEC	AC000123.3	-0.370197	4.64723	8.5467	0.00346148	0.3441	Unchanged
ENSG00000230551	lncRNA	novel transcript	AC021078.1	0.181518	5.01973	8.50715	0.00353754	0.344809	Unchanged
ENSG00000279039	TEC	TEC	AC011447.6	0.524538	1.64524	8.39192	0.00376892	0.35349	Unchanged
ENSG00000239948	misc_RNA	RNA, 7SL, cytoplasmic 368, pseudogene [Source:HGNC Symbol;Acc:HGNC:46384]	RN7SL368P	1.87002	-1.57708	8.38597	0.00378127	0.35349	Unchanged
ENSG00000280092	TEC	novel transcript	AC002044.3	1.80193	-1.5155	8.27034	0.00402981	0.360658	Unchanged
ENSG00000214796	transcribed_unprocessed_pseudogene	tubulin alpha 5, pseudogene [Source:HGNC Symbol;Acc:HGNC:54799]	TUBA5P	0.207758	4.14002	8.26605	0.00403932	0.360658	Unchanged
ENSG00000224505	lncRNA	novel transcript, antisense to HEXIM1 and HEXIM2	AC138150.1	0.489197	1.02728	8.20913	0.00416801	0.364302	Unchanged
ENSG00000272108	lncRNA	novel transcript	AC244517.1	-0.299472	2.8451	8.20471	0.00417819	0.364302	Unchanged
ENSG00000273451	lncRNA	novel transcript, sense intronic to ZMYND8	AL031666.3	1.69794	-1.48008	8.08435	0.00446491	0.380131	Unchanged
ENSG00000276168	misc_RNA	RNA component of signal recognition particle 7SL1 [Source:HGNC Symbol;Acc:HGNC:10038]	RN7SL1	1.05696	2.68396	7.98684	0.00471185	0.38816	Unchanged
ENSG00000273464	lncRNA	novel transcript, antisense to GRIK1	AP000238.1	-1.97617	-1.46829	7.94823	0.00481345	0.390216	Unchanged
ENSG00000233558	processed_pseudogene	RPS5 (40S Ribosomal Protein S5) pseudogene	AL050331.1	0.82723	-0.228353	7.91081	0.00491403	0.395466	Unchanged
ENSG00000255717	lncRNA	small nucleolar RNA host gene 1 [Source:HGNC Symbol;Acc:HGNC:32688]	SNHG1	0.12607	6.26373	7.84215	0.00510418	0.401007	Unchanged
ENSG00000272872	lncRNA	novel transcript, sense intronic to novel transcript	AP000525.1	-0.371026	1.99365	7.78934	0.00525553	0.408011	Unchanged
ENSG00000235847	processed_pseudogene	lactate dehydrogenase A pseudogene 7 [Source:HGNC Symbol;Acc:HGNC:23144]	LDHAP7	-1.00437	-0.757193	7.68605	0.00556493	0.42026	Unchanged
ENSG00000259984	unprocessed_pseudogene	novel pseudogene	AL928711.1	1.62766	-1.99647	7.6789	0.00558702	0.420299	Unchanged
ENSG00000228109	lncRNA	MELTF antisense RNA 1 [Source:HGNC Symbol;Acc:HGNC:40373]	MELTF-AS1	0.356349	2.32076	7.65659	0.00565654	0.423893	Unchanged
ENSG00000257242	lncRNA	long intergenic non-protein coding RNA 1619 [Source:HGNC Symbol;Acc:HGNC:27409]	LINC01619	0.378366	1.75632	7.64864	0.00568151	0.424133	Unchanged
ENSG00000259340	processed_pseudogene	CDC28 protein kinase regulatory subunit 2 (CKS2) pseudogene	AC110588.1	-1.75569	-1.69471	7.63587	0.00572189	0.425516	Unchanged
ENSG00000227896	lncRNA	novel transcript	AL731569.1	0.439014	1.80693	7.6215	0.00576764	0.427288	Unchanged
ENSG00000284959	lncRNA	novel transcript, antisense to TSHR	AC007262.2	0.770842	0.196294	7.60217	0.00582981	0.42846	Unchanged
ENSG00000233143	lncRNA	DIRC3 antisense RNA 1 [Source:HGNC Symbol;Acc:HGNC:50636]	DIRC3-AS1	-0.893432	-0.367055	7.60759	0.0058123	0.42846	Unchanged
ENSG00000275092	lncRNA	novel transcript, sense intronic to MAPK8IP3	AL031710.2	-1.96732	-1.7933	7.57809	0.00590819	0.428717	Unchanged
ENSG00000256064	lncRNA	novel transcript	AC063926.1	-0.315307	2.34875	7.50691	0.00614627	0.435641	Unchanged
ENSG00000272953	lncRNA	novel transcript	AC092171.4	0.881073	-0.429011	7.48738	0.0062133	0.435641	Unchanged
ENSG00000288586	lncRNA	novel transcript	AL357874.3	1.14284	-0.875937	7.5077	0.00614357	0.435641	Unchanged
ENSG00000227766	unprocessed_pseudogene	HLA complex group 4 pseudogene 5	AL671277.1	-0.803703	-0.184079	7.45429	0.00632854	0.435641	Unchanged
ENSG00000246174	lncRNA	KCTD21 antisense RNA 1 [Source:HGNC Symbol;Acc:HGNC:48674]	KCTD21-AS1	0.29454	2.79076	7.38433	0.00657944	0.435641	Unchanged
ENSG00000163364	lncRNA	long intergenic non-protein coding RNA 1116 [Source:HGNC Symbol;Acc:HGNC:49259]	LINC01116	-0.315025	2.74676	7.39128	0.00655409	0.435641	Unchanged
ENSG00000247556	lncRNA	OIP5 antisense RNA 1 [Source:HGNC Symbol;Acc:HGNC:43563]	OIP5-AS1	-0.0878093	7.62848	7.3911	0.00655475	0.435641	Unchanged
ENSG00000182873	lncRNA	PRKCZ antisense RNA 1 [Source:HGNC Symbol;Acc:HGNC:40477]	PRKCZ-AS1	-0.348287	2.1782	7.40838	0.00649207	0.435641	Unchanged
ENSG00000224831	processed_pseudogene	transmembrane protein 183B [Source:HGNC Symbol;Acc:HGNC:33205]	TMEM183B	1.3177	-1.38948	7.38663	0.00657104	0.435641	Unchanged
ENSG00000269570	lncRNA	novel transcript, antisense to ZFP91	AP001350.1	-1.28754	-0.867491	7.36033	0.00666784	0.438365	Unchanged
ENSG00000286960	lncRNA	novel transcript	AC009869.1	-1.02373	-0.85266	7.30048	0.00689362	0.445807	Unchanged
ENSG00000236456	processed_pseudogene	density-regulated protein (DENR) pseudogene	AL035458.1	1.01197	-0.213283	7.26548	0.00702926	0.449769	Unchanged
ENSG00000125462	lncRNA	MIR9-1 host gene [Source:HGNC Symbol;Acc:HGNC:30780]	MIR9-1HG	0.176582	5.08407	7.24359	0.00711547	0.450123	Unchanged
ENSG00000273568	lncRNA	novel transcript, sense intronic to PUS1	AC131009.3	0.719364	0.536952	7.21908	0.00721327	0.45203	Unchanged
ENSG00000213669	processed_pseudogene	ribosomal protein L21 (RPL21) pseudogene	AL137074.1	-1.53468	-1.52771	7.16401	0.00743806	0.455541	Unchanged
ENSG00000222112	misc_RNA	RN7SK pseudogene 16 [Source:HGNC Symbol;Acc:HGNC:45740]	RN7SKP16	0.789962	-0.0517932	7.1057	0.00768394	0.455541	Unchanged
ENSG00000263829	processed_pseudogene	SINHCAF pseudogene 1 [Source:HGNC Symbol;Acc:HGNC:19052]	SINHCAFP1	-1.34732	-1.3781	7.05647	0.00789794	0.463594	Unchanged
ENSG00000214870	lncRNA	novel transcript	AC004540.1	0.2396	3.15568	6.93916	0.00843288	0.463684	Unchanged
ENSG00000271855	lncRNA	novel transcript	AC073195.1	0.638306	0.238925	6.92878	0.00848194	0.463684	Unchanged
ENSG00000223930	lncRNA	novel transcript, antisense to KCNMB2	AC117453.1	1.36546	-1.60273	6.98874	0.00820242	0.463684	Unchanged
ENSG00000219410	lncRNA	novel transcript	AC125494.1	-1.25417	-1.21285	6.88694	0.00868276	0.463684	Unchanged
ENSG00000273373	lncRNA	novel transcript, antisense to SLC16A4	AL355488.1	0.224074	4.18725	6.95816	0.00834377	0.463684	Unchanged
ENSG00000197308	lncRNA	GATA3 antisense RNA 1 [Source:HGNC Symbol;Acc:HGNC:33786]	GATA3-AS1	0.16121	5.19012	6.95385	0.00836389	0.463684	Unchanged
ENSG00000261599	transcribed_unprocessed_pseudogene	hect domain and RLD 2 pseudogene 8 [Source:HGNC Symbol;Acc:HGNC:38747]	HERC2P8	-0.616666	0.413564	6.88917	0.00867196	0.463684	Unchanged
ENSG00000261455	lncRNA	long intergenic non-protein coding RNA 1003 [Source:HGNC Symbol;Acc:HGNC:48957]	LINC01003	0.239234	3.087	6.93288	0.00846253	0.463684	Unchanged
ENSG00000231205	transcribed_unprocessed_pseudogene	zinc finger protein 826, pseudogene [Source:HGNC Symbol;Acc:HGNC:33875]	ZNF826P	0.143768	5.02924	6.90371	0.00860169	0.463684	Unchanged
ENSG00000213361	processed_pseudogene	ribosomal protein L36 (RPL36) pseudogene	AC004884.1	1.89579	-1.91482	6.8309	0.00895942	0.465507	Unchanged
ENSG00000286635	lncRNA	novel transcript, sense intronic to RBFOX1	AC006112.1	1.48401	-1.58963	6.83821	0.0089228	0.465507	Unchanged
ENSG00000272941	lncRNA	novel transcript, antisense to C7orf49	AC083862.1	-1.78362	-1.83762	6.84171	0.00890534	0.465507	Unchanged
ENSG00000242125	lncRNA	small nucleolar RNA host gene 3 [Source:HGNC Symbol;Acc:HGNC:10118]	SNHG3	0.148278	5.27832	6.85726	0.00882819	0.465507	Unchanged
ENSG00000247092	lncRNA	small nucleolar RNA host gene 10 [Source:HGNC Symbol;Acc:HGNC:27510]	SNHG10	0.243957	3.4519	6.83224	0.00895268	0.465507	Unchanged
ENSG00000259768	lncRNA	novel transcript, antisense to ZFHX3	AC004943.2	-0.182768	4.48224	6.76681	0.00928688	0.465554	Unchanged
ENSG00000279598	TEC	novel transcript, antisense to titin	AC009948.3	-0.834007	-0.155969	6.7717	0.00926145	0.465554	Unchanged
ENSG00000226310	lncRNA	novel transcript	AL022157.1	0.954118	-0.67476	6.7124	0.00957448	0.465554	Unchanged
ENSG00000271228	lncRNA	novel transcript, antisense to DPY30	AL121655.1	-2.03411	-1.93059	6.7329	0.00946508	0.465554	Unchanged
ENSG00000282772	lncRNA	novel transcript, antisense to C10orf32	AL358790.1	-1.27677	-1.36748	6.7444	0.00940426	0.465554	Unchanged
ENSG00000229644	processed_pseudogene	nicotinamide phosphoribosyltransferase pseudogene 1 [Source:HGNC Symbol;Acc:HGNC:17633]	NAMPTP1	0.616715	0.591183	6.79659	0.0091332	0.465554	Unchanged
ENSG00000231544	processed_pseudogene	ribosomal L24 domain containing 1 pseudogene 11 [Source:HGNC Symbol;Acc:HGNC:37881]	RSL24D1P11	-1.56698	-1.36706	6.74003	0.00942729	0.465554	Unchanged
ENSG00000243498	processed_pseudogene	ubiquitin A-52 residue ribosomal protein fusion product 1 pseudogene 5 [Source:HGNC Symbol;Acc:HGNC:36993]	UBA52P5	2.00938	-2.19378	6.68671	0.00971342	0.47047	Unchanged
ENSG00000204623	transcribed_unitary_pseudogene	zinc ribbon domain containing 1 antisense, pseudogene [Source:HGNC Symbol;Acc:HGNC:13924]	ZNRD1ASP	-0.174796	4.57724	6.67579	0.00977314	0.47047	Unchanged
ENSG00000235706	lncRNA	DICER1 antisense RNA 1 [Source:HGNC Symbol;Acc:HGNC:43017]	DICER1-AS1	0.287401	2.66044	6.64737	0.00993025	0.473108	Unchanged
ENSG00000241764	lncRNA	novel transcript, antisense to CBLL1	AC002467.1	-0.43832	1.60253	6.62622	0.0100488	0.474527	Unchanged
ENSG00000275180	lncRNA	novel transcript	AC048341.2	0.440678	1.15757	6.58132	0.0103055	0.476421	Unchanged
ENSG00000262119	lncRNA	novel transcript, sense intronic to NOVA1	AL079343.1	1.03424	-0.845339	6.53304	0.0105889	0.482041	Unchanged
ENSG00000232303	processed_pseudogene	DNA fragmentation factor subunit beta pseudogene 1 [Source:HGNC Symbol;Acc:HGNC:49815]	DFFBP1	0.535819	0.850841	6.51623	0.0106894	0.484867	Unchanged
ENSG00000234915	lncRNA	novel transcript, antisense to PPP2R5A	AL360091.3	1.32491	-1.20339	6.45088	0.0110897	0.493015	Unchanged
ENSG00000251474	transcribed_unprocessed_pseudogene	ribosomal protein L32 pseudogene 3 [Source:HGNC Symbol;Acc:HGNC:27024]	RPL32P3	0.140784	4.7026	6.44791	0.0111083	0.493015	Unchanged
ENSG00000215210	processed_pseudogene	RBMX pseudogene 2 [Source:HGNC Symbol;Acc:HGNC:23284]	RBMXP2	1.15879	-1.13745	6.41613	0.0113088	0.498509	Unchanged
ENSG00000234709	transcribed_processed_pseudogene	UPF3A pseudogene 3 [Source:HGNC Symbol;Acc:HGNC:38395]	UPF3AP3	-1.21316	-1.28286	6.39235	0.0114613	0.501826	Unchanged
ENSG00000266957	lncRNA	novel transcript, antisense to KATNAL2	AC012254.1	1.35742	-1.38922	6.32585	0.011899	0.515202	Unchanged
ENSG00000272234	lncRNA	novel transcript, antisense to SEPP1	AC008945.1	0.482227	1.06905	6.31693	0.0119591	0.51551	Unchanged
ENSG00000238251	processed_pseudogene	NSA2 pseudogene 7 [Source:HGNC Symbol;Acc:HGNC:54588]	NSA2P7	1.4181	-1.64132	6.31065	0.0120015	0.516195	Unchanged
ENSG00000268205	lncRNA	novel transcript	AC005261.1	0.328836	4.49944	6.25156	0.0124084	0.516411	Unchanged
ENSG00000261800	lncRNA	novel transcript	AC023824.5	-0.580237	0.607429	6.25839	0.0123606	0.516411	Unchanged
ENSG00000204283	lncRNA	long intergenic non-protein coding RNA 1973 [Source:HGNC Symbol;Acc:HGNC:52800]	LINC01973	1.36849	-1.54036	6.25079	0.0124138	0.516411	Unchanged
ENSG00000182057	lncRNA	opioid growth factor receptor pseudogene 1 [Source:HGNC Symbol;Acc:HGNC:50511]	OGFRP1	-0.909291	-0.515401	6.27626	0.0122366	0.516411	Unchanged
ENSG00000274828	lncRNA	novel transcript	AC068473.5	0.213423	3.25813	6.13442	0.0132575	0.527503	Unchanged
ENSG00000236263	lncRNA	novel transcript	AC234582.1	0.753612	-0.0734453	6.13715	0.013237	0.527503	Unchanged
ENSG00000280129	TEC	TEC	AL132780.5	-0.433658	1.56619	6.14757	0.0131593	0.527503	Unchanged
ENSG00000287765	lncRNA	novel transcript, antisense to TM9SF1	AL136295.17	-1.26496	-1.52772	6.13303	0.0132679	0.527503	Unchanged
ENSG00000271387	lncRNA	C1orf21 divergent transcript [Source:HGNC Symbol;Acc:HGNC:55249]	AL445228.2	0.847776	-0.750519	6.158	0.0130819	0.527503	Unchanged
ENSG00000210100	Mt_tRNA	mitochondrially encoded tRNA-Ile (AUU/C) [Source:HGNC Symbol;Acc:HGNC:7488]	MT-TI	-0.393116	1.57978	6.12758	0.0133089	0.527503	Unchanged
ENSG00000255085	transcribed_unprocessed_pseudogene	zinc finger protein 154 (ZNF154) pseudogene	AF186192.2	-0.194742	3.60692	6.09662	0.013544	0.530205	Unchanged
ENSG00000285793	lncRNA	ANAPC1 pseudogene 2 [Source:NCBI gene (formerly Entrezgene);Acc:285074]	ANAPC1P2	-0.790696	-0.736388	6.09159	0.0135827	0.530205	Unchanged
ENSG00000287897	lncRNA	novel transcript, sense intronic to CADM1	AP000465.1	1.36836	-1.51577	6.09991	0.0135189	0.530205	Unchanged
ENSG00000286226	lncRNA	novel transcript	AC093849.3	-1.77645	-2.03015	6.04061	0.0139805	0.530355	Unchanged
ENSG00000223509	transcribed_processed_pseudogene	WAS protein homolog associated with actin, golgi membranes and microtubules (WHAMM) pseudogene	AC135983.2	-0.397151	1.67896	6.05045	0.0139028	0.530355	Unchanged
ENSG00000259137	processed_pseudogene	chromosome 11 open reading frame 58 (C11orf58) pseudogene	AL109766.1	-1.10745	-1.3141	6.02023	0.0141428	0.530355	Unchanged
ENSG00000205930	lncRNA	C21orf62 antisense RNA 1 [Source:HGNC Symbol;Acc:HGNC:1290]	C21orf62-AS1	0.291612	2.347	6.01539	0.0141816	0.530355	Unchanged
ENSG00000227014	lncRNA	FKBP14 antisense RNA 1 [Source:HGNC Symbol;Acc:HGNC:40990]	FKBP14-AS1	-0.714214	-0.451285	6.01717	0.0141673	0.530355	Unchanged
ENSG00000214485	processed_pseudogene	ribosomal protein L7 pseudogene 1 [Source:HGNC Symbol;Acc:HGNC:10367]	RPL7P1	-0.453332	1.55116	6.01733	0.0141661	0.530355	Unchanged
ENSG00000276380	polymorphic_pseudogene	ubiquitin conjugating enzyme E2 N like (gene/pseudogene) [Source:HGNC Symbol;Acc:HGNC:31710]	UBE2NL	1.36834	-1.49173	6.02066	0.0141393	0.530355	Unchanged
ENSG00000231113	lncRNA	novel transcript	AL035587.1	0.276128	2.72075	5.98378	0.0144381	0.536853	Unchanged
ENSG00000261079	lncRNA	novel transcript	AC009053.2	1.59314	-1.91494	5.93873	0.0148117	0.54099	Unchanged
ENSG00000267327	lncRNA	novel transcript	AC009271.1	-1.50713	-1.62801	5.94604	0.0147504	0.54099	Unchanged
ENSG00000279092	TEC	TEC	AC025678.3	0.672875	-0.0389747	5.939	0.0148094	0.54099	Unchanged
ENSG00000259523	lncRNA	novel transcript, antisense to TJP1	AC022613.2	-1.07684	-1.01311	5.92827	0.0148998	0.542633	Unchanged
ENSG00000287588	lncRNA	novel transcript	AC092634.8	1.59692	-1.8227	5.91858	0.014982	0.543593	Unchanged
ENSG00000272054	lncRNA	novel transcript	AC007390.1	0.293232	2.22097	5.80894	0.0159449	0.547401	Unchanged
ENSG00000266910	processed_pseudogene	TAF9 RNA polymerase II, TATA box binding protein (TBP)-associated factor, 32kDa (TAF9) pseudogene	AC008507.1	0.736765	0.0566032	5.80979	0.0159372	0.547401	Unchanged
ENSG00000287242	lncRNA	novel transcript, antisense to SCARB1	AC073593.2	0.729808	-0.417948	5.83912	0.0156736	0.547401	Unchanged
ENSG00000270072	lncRNA	novel transcript	AC090559.2	1.58114	-1.64124	5.86609	0.0154353	0.547401	Unchanged
ENSG00000253982	lncRNA	novel transcript	AC100810.1	0.211353	3.3207	5.79553	0.016067	0.547401	Unchanged
ENSG00000288075	lncRNA	novel transcript	AC108519.1	1.34677	-1.12821	5.78972	0.0161202	0.547401	Unchanged
ENSG00000232729	lncRNA	novel transcript, antisense to GTF2I	AC211433.1	-1.12369	-1.09134	5.79486	0.0160731	0.547401	Unchanged
ENSG00000272630	lncRNA	novel transcript	AL731563.3	0.42928	1.68291	5.82484	0.0158014	0.547401	Unchanged
ENSG00000210195	Mt_tRNA	mitochondrially encoded tRNA-Thr (ACN) [Source:HGNC Symbol;Acc:HGNC:7499]	MT-TT	-0.342117	1.92164	5.80091	0.0160179	0.547401	Unchanged
ENSG00000251666	lncRNA	ZNF346 intronic transcript 1 [Source:HGNC Symbol;Acc:HGNC:41423]	ZNF346-IT1	0.690175	-0.100691	5.88356	0.0152829	0.547401	Unchanged
ENSG00000225755	processed_pseudogene	tRNA nucleotidyl transferase, CCA-adding, 1 (TRNT1) pseudogene	AL451063.1	-0.97514	-1.03042	5.7795	0.0162142	0.548437	Unchanged
ENSG00000244349	lncRNA	HLA complex group 16	AL662791.1	-1.48453	-1.76418	5.77046	0.0162977	0.548437	Unchanged
ENSG00000272143	lncRNA	FGF14 antisense RNA 2 [Source:HGNC Symbol;Acc:HGNC:44368]	FGF14-AS2	0.334819	1.95813	5.77301	0.0162742	0.548437	Unchanged
ENSG00000273113	lncRNA	novel transcript	AC133528.1	-1.0119	-0.922625	5.75363	0.0164546	0.550838	Unchanged
ENSG00000236830	lncRNA	CBR3 antisense RNA 1 [Source:HGNC Symbol;Acc:HGNC:43664]	CBR3-AS1	0.801218	-0.553038	5.74252	0.0165591	0.55246	Unchanged
ENSG00000187013	lncRNA	long intergenic non-protein coding RNA 2875 [Source:HGNC Symbol;Acc:HGNC:32699]	LINC02875	1.09337	-1.23292	5.70937	0.0168746	0.558209	Unchanged
ENSG00000279838	TEC	TEC	AL356273.3	-0.455428	1.37711	5.69834	0.016981	0.559826	Unchanged
ENSG00000278915	lncRNA	novel transcript, antisense to PCDHA12	AC005609.3	-0.539824	0.474739	5.68238	0.0171361	0.562238	Unchanged
ENSG00000273654	transcribed_processed_pseudogene	citrate synthase (CS) pseudogene	AC020904.2	0.647083	-0.184803	5.68191	0.0171407	0.562238	Unchanged
ENSG00000225498	lncRNA	novel transcript	AC002064.1	1.0188	-1.33557	5.63935	0.0175617	0.562785	Unchanged
ENSG00000286443	lncRNA	novel transcript, antisense to PLXDC1	AC091178.2	0.477439	0.550212	5.67436	0.0172146	0.562785	Unchanged
ENSG00000263731	lncRNA	novel transcript	AC145207.5	0.333899	3.04117	5.65869	0.0173691	0.562785	Unchanged
ENSG00000278987	TEC	TEC	AL031009.1	0.423357	1.11216	5.63966	0.0175586	0.562785	Unchanged
ENSG00000225569	processed_pseudogene	chaperonin containing TCP1 subunit 4 pseudogene 2 [Source:HGNC Symbol;Acc:HGNC:35141]	CCT4P2	0.698652	0.0163001	5.61352	0.0178224	0.565691	Unchanged
ENSG00000197149	processed_pseudogene	ribosomal protein S2 (RPS2) pseudogene	AC107956.1	0.805763	-0.615448	5.59743	0.0179868	0.569846	Unchanged
ENSG00000287670	lncRNA	novel transcript	AC108479.1	1.30069	-1.86847	5.57492	0.0182195	0.571639	Unchanged
ENSG00000286319	lncRNA	novel transcript, antisense to MPP5	AL135978.1	0.80645	-0.830449	5.56646	0.0183077	0.573486	Unchanged
ENSG00000203999	lncRNA	long intergenic non-protein coding RNA 1270 [Source:HGNC Symbol;Acc:HGNC:27658]	LINC01270	0.192064	3.52034	5.55636	0.0184136	0.574954	Unchanged
ENSG00000249307	lncRNA	long intergenic non-protein coding RNA 1088 [Source:HGNC Symbol;Acc:HGNC:49148]	LINC01088	-0.488683	0.76989	5.54853	0.0184962	0.576255	Unchanged
ENSG00000259502	processed_pseudogene	protein kinase C, eta (PRKCH) pseudogene	AL132640.1	1.08973	-1.44567	5.49801	0.0190381	0.586	Unchanged
ENSG00000271947	lncRNA	novel transcript	AC017076.1	-0.758049	-0.298626	5.46755	0.0193727	0.586115	Unchanged
ENSG00000288459	lncRNA	novel transcript	AL512357.2	-0.877974	0.0337261	5.48748	0.0191531	0.586115	Unchanged
ENSG00000272523	lncRNA	long intergenic non-protein coding RNA 1023 [Source:HGNC Symbol;Acc:HGNC:49004]	LINC01023	-1.15834	-1.22278	5.47111	0.0193334	0.586115	Unchanged
ENSG00000229388	lncRNA	long intergenic non-protein coding RNA 1715 [Source:HGNC Symbol;Acc:HGNC:52502]	LINC01715	1.36723	-1.62826	5.45085	0.0195588	0.586283	Unchanged
ENSG00000078319	transcribed_unprocessed_pseudogene	PMS1 homolog 2, mismatch repair system component pseudogene 1 [Source:HGNC Symbol;Acc:HGNC:9123]	PMS2P1	0.141277	5.2416	5.45388	0.0195249	0.586283	Unchanged
ENSG00000260608	lncRNA	novel transcript, antisense to BTBD1	AC024270.3	0.91417	-1.06533	5.38932	0.0202603	0.59378	Unchanged
ENSG00000265750	lncRNA	novel transcript	AC090772.3	-0.832256	-0.78601	5.39711	0.0201701	0.59378	Unchanged
ENSG00000254855	lncRNA	novel transcript	AP001107.8	-1.21891	-1.64127	5.37035	0.0204819	0.59378	Unchanged
ENSG00000235919	lncRNA	ASH1L antisense RNA 1 [Source:HGNC Symbol;Acc:HGNC:44146]	ASH1L-AS1	0.398859	1.22248	5.39144	0.0202358	0.59378	Unchanged
ENSG00000242797	lncRNA	GLYCTK antisense RNA 1 [Source:HGNC Symbol;Acc:HGNC:41043]	GLYCTK-AS1	0.416833	1.06477	5.36315	0.0205667	0.59378	Unchanged
ENSG00000233010	processed_pseudogene	ribulose-5-phosphate-3-epimerase pseudogene 4 [Source:HGNC Symbol;Acc:HGNC:44523]	RPEP4	-1.09321	-1.33518	5.36632	0.0205293	0.59378	Unchanged
ENSG00000256464	processed_pseudogene	tyrosine 3-monooxygenase/tryptophan 5-monooxygenase activation protein beta pseudogene 2 [Source:HGNC Symbol;Acc:HGNC:50295]	YWHABP2	-0.943008	-1.02185	5.40608	0.0200667	0.59378	Unchanged
ENSG00000236307	processed_pseudogene	eukaryotic translation elongation factor 1 epsilon 1 pseudogene 1 [Source:HGNC Symbol;Acc:HGNC:51459]	EEF1E1P1	1.21286	-1.24279	5.35826	0.0206243	0.594134	Unchanged
ENSG00000270933	lncRNA	novel transcript	AC010719.1	1.04534	-1.41191	5.30419	0.0212741	0.596406	Unchanged
ENSG00000264577	lncRNA	novel transcript, antisense to RPL23A	AC010761.1	-0.961809	-0.621389	5.32759	0.0209904	0.596406	Unchanged
ENSG00000260111	lncRNA	novel transcript, antisense to ST3GAL2	AC012184.1	-0.882594	-0.829837	5.30358	0.0212816	0.596406	Unchanged
ENSG00000261889	lncRNA	novel transcript	AC108134.2	1.35916	-1.46821	5.31801	0.0211061	0.596406	Unchanged
ENSG00000228393	lncRNA	long intergenic non-protein coding RNA 1004 [Source:HGNC Symbol;Acc:HGNC:48961]	LINC01004	0.293751	2.1399	5.30504	0.0212639	0.596406	Unchanged
ENSG00000226549	processed_pseudogene	stearoyl-CoA desaturase pseudogene 1 [Source:HGNC Symbol;Acc:HGNC:10572]	SCDP1	1.29554	-1.58983	5.33325	0.0209223	0.596406	Unchanged
ENSG00000230461	lncRNA	PROX1 antisense RNA 1 [Source:HGNC Symbol;Acc:HGNC:43656]	PROX1-AS1	0.147682	4.28428	5.29044	0.0214427	0.597957	Unchanged
ENSG00000217950	processed_pseudogene	NOC2 like nucleolar associated transcriptional repressor pseudogene 2 [Source:HGNC Symbol;Acc:HGNC:52286]	NOC2LP2	-1.30605	-1.43347	5.26347	0.0217776	0.6005	Unchanged
ENSG00000252759	misc_RNA	Y RNA [Source:RFAM;Acc:RF00019]	Y_RNA	1.17079	-1.45693	5.26249	0.0217898	0.6005	Unchanged
ENSG00000280798	lncRNA	long intergenic non-protein coding RNA 294 [Source:HGNC Symbol;Acc:HGNC:27456]	LINC00294	-0.11455	5.44214	5.23306	0.0221615	0.603907	Unchanged
ENSG00000258450	lncRNA	novel transcript	AL139099.2	0.828525	-0.571013	5.21865	0.022346	0.605726	Unchanged
ENSG00000256139	lncRNA	novel transcript	AC007637.1	-0.495236	0.456897	5.16379	0.0230625	0.608876	Unchanged
ENSG00000264745	lncRNA	TTC39C antisense RNA 1 [Source:HGNC Symbol;Acc:HGNC:51321]	TTC39C-AS1	1.1363	-1.45689	5.16727	0.0230164	0.608876	Unchanged
ENSG00000271141	lncRNA	novel transcript	AC010680.4	0.375651	1.75623	5.14804	0.0232726	0.610577	Unchanged
ENSG00000228031	lncRNA	novel transcript	AC078842.1	0.469121	0.669763	5.11863	0.0236703	0.610577	Unchanged
ENSG00000247735	lncRNA	novel transcript, antisense to KCTD13	AC120114.1	0.304316	2.14289	5.13068	0.0235065	0.610577	Unchanged
ENSG00000269934	lncRNA	novel transcript, antisense to OBSCN	AL353593.1	-0.948796	-1.3354	5.13188	0.0234902	0.610577	Unchanged
ENSG00000231741	processed_pseudogene	novel pseudogene	AL353743.3	1.62937	-1.70809	5.14697	0.0232869	0.610577	Unchanged
ENSG00000249855	processed_pseudogene	eukaryotic translation elongation factor 1 alpha 1 pseudogene 19 [Source:HGNC Symbol;Acc:HGNC:37892]	EEF1A1P19	0.310724	1.88512	5.12073	0.0236416	0.610577	Unchanged
ENSG00000230454	lncRNA	novel transcript	U73166.1	0.341725	1.65062	5.11253	0.0237537	0.610577	Unchanged
ENSG00000255182	lncRNA	novel transcript, antisense to PPP1R16A	AC084125.2	0.422308	1.35806	5.07212	0.0243136	0.617636	Unchanged
ENSG00000251639	processed_pseudogene	protein phosphatase 2, regulatory subunit B, delta isoform (PPP2R2D) pseudogene	AC092535.3	1.08383	-1.01327	5.05772	0.0245164	0.618602	Unchanged
ENSG00000262877	lncRNA	novel transcript	AC110285.2	0.307985	2.75952	5.04696	0.0246692	0.618602	Unchanged
ENSG00000279267	TEC	TEC	AL078621.1	0.555154	0.318449	5.04976	0.0246294	0.618602	Unchanged
ENSG00000259577	lncRNA	competing endogenous lncRNA 1 for miR-4707-5p and miR-4767 [Source:HGNC Symbol;Acc:HGNC:52664]	CERNA1	1.25081	-1.29339	5.04809	0.0246532	0.618602	Unchanged
ENSG00000285844	lncRNA	novel transcript	FO393414.3	1.23597	-1.56469	5.04865	0.0246452	0.618602	Unchanged
ENSG00000257135	lncRNA	ODC1 divergent transcript [Source:HGNC Symbol;Acc:HGNC:54070]	ODC1-DT	0.875194	-0.837687	5.05251	0.0245902	0.618602	Unchanged
ENSG00000233382	transcribed_processed_pseudogene	NFKB activating protein pseudogene 1 [Source:HGNC Symbol;Acc:HGNC:26706]	NKAPP1	0.551487	0.0284223	5.04317	0.0247231	0.619159	Unchanged
ENSG00000218502	processed_pseudogene	H2A.Z histone pseudogene 3 [Source:HGNC Symbol;Acc:HGNC:38013]	H2AZP3	-1.01395	-1.27266	5.03633	0.024821	0.620017	Unchanged
ENSG00000276248	lncRNA	novel transcript, sense intronic to TMCO3	AL442125.1	-0.241648	2.6428	5.01322	0.0251544	0.621965	Unchanged
ENSG00000280604	lncRNA	PCBP3 overlapping transcript 1	AJ239328.1	0.189215	3.80426	4.99444	0.0254289	0.622618	Unchanged
ENSG00000229956	lncRNA	ZRANB2 antisense RNA 2 (head to head) [Source:HGNC Symbol;Acc:HGNC:43595]	ZRANB2-AS2	0.340887	1.53984	4.99392	0.0254365	0.622618	Unchanged
ENSG00000240808	processed_pseudogene	ribosomal protein L34 (RPL34) pseudogene	AC126389.1	-1.14981	-1.53983	4.98686	0.0255405	0.62387	Unchanged
ENSG00000272702	lncRNA	novel transcript	AC010913.1	1.23585	-1.51579	4.97603	0.0257009	0.624385	Unchanged
ENSG00000275630	lncRNA	novel transcript	AC004816.2	-1.42896	-1.66749	4.9527	0.0260499	0.627202	Unchanged
ENSG00000233264	processed_pseudogene	peptidylprolyl isomerase (cyclophilin)-like 4 (PPIL4) pseudogene	AC006042.2	0.446206	2.48858	4.94218	0.026209	0.627202	Unchanged
ENSG00000269243	lncRNA	novel transcript, antisense RAB8A	AC008894.2	-1.15809	-1.5523	4.95795	0.025971	0.627202	Unchanged
ENSG00000249363	processed_pseudogene	transient receptor potential cation channel family (TRPC7) pseudogene	AC011411.1	-1.22073	-1.68119	4.93409	0.0263319	0.627202	Unchanged
ENSG00000275389	lncRNA	novel transcript	AC068790.9	-0.599072	-0.083122	4.94222	0.0262084	0.627202	Unchanged
ENSG00000260669	lncRNA	novel transcript	AL096870.2	-0.822049	-0.545427	4.9495	0.0260982	0.627202	Unchanged
ENSG00000286369	lncRNA	novel transcript	AP002813.1	1.08313	-1.57731	4.94023	0.0262386	0.627202	Unchanged
ENSG00000267871	lncRNA	ZNF460 antisense RNA 1 [Source:HGNC Symbol;Acc:HGNC:53774]	ZNF460-AS1	0.481211	0.530438	4.93886	0.0262594	0.627202	Unchanged
ENSG00000260597	lncRNA	novel transcript	AC012531.1	0.775226	-0.61556	4.92924	0.0264059	0.62743	Unchanged
ENSG00000272217	lncRNA	novel transcript	AL645940.1	1.08514	-1.4004	4.93023	0.0263907	0.62743	Unchanged
ENSG00000237276	transcribed_unprocessed_pseudogene	anoctamin 7 like 1 (pseudogene) [Source:HGNC Symbol;Acc:HGNC:32248]	ANO7L1	-0.797767	-0.867902	4.92179	0.0265201	0.627921	Unchanged
ENSG00000255495	lncRNA	novel transcript	AC145124.1	0.877072	-0.729824	4.91399	0.0266401	0.628396	Unchanged
ENSG00000228113	lncRNA	novel transcript, antisense to STEAP4	AC003991.1	0.518137	0.450391	4.9074	0.0267419	0.629437	Unchanged
ENSG00000266850	lncRNA	novel transcript, antisense to RBBP8	AC090912.2	-1.15263	-1.75022	4.90279	0.0268134	0.629437	Unchanged
ENSG00000226002	unprocessed_pseudogene	general transcription factor IIi pseudogene 14 [Source:HGNC Symbol;Acc:HGNC:51726]	GTF2IP14	0.623288	0.0451337	4.89811	0.026886	0.629904	Unchanged
ENSG00000180229	transcribed_unprocessed_pseudogene	hect domain and RLD 2 pseudogene 3 [Source:HGNC Symbol;Acc:HGNC:4871]	HERC2P3	-0.116163	5.2169	4.8932	0.0269626	0.629904	Unchanged
ENSG00000280426	TEC	TEC	AC084876.2	0.628043	-0.218505	4.87602	0.0272323	0.631659	Unchanged
ENSG00000196312	transcribed_unprocessed_pseudogene	major facilitator superfamily domain containing 14C [Source:HGNC Symbol;Acc:HGNC:23672]	MFSD14C	-0.0978241	7.06484	4.83154	0.0279436	0.637007	Unchanged
ENSG00000257612	lncRNA	MIR4307 host gene [Source:HGNC Symbol;Acc:HGNC:52004]	MIR4307HG	0.838597	-0.474609	4.84174	0.0277788	0.637007	Unchanged
ENSG00000202474	rRNA_pseudogene	RNA, 5S ribosomal pseudogene 283 [Source:HGNC Symbol;Acc:HGNC:43183]	RNA5SP283	-0.98312	-1.10047	4.82193	0.0280999	0.637007	Unchanged
ENSG00000245112	lncRNA	SMARCA5 antisense RNA 1 [Source:HGNC Symbol;Acc:HGNC:39982]	SMARCA5-AS1	-0.706823	-0.36202	4.83938	0.0278169	0.637007	Unchanged
ENSG00000180221	processed_pseudogene	tumor protein, translationally-controlled 1 pseudogene 10 [Source:HGNC Symbol;Acc:HGNC:49301]	TPT1P10	1.31328	-1.53996	4.84048	0.0277992	0.637007	Unchanged
ENSG00000256628	lncRNA	ZBTB11 antisense RNA 1 [Source:HGNC Symbol;Acc:HGNC:48573]	ZBTB11-AS1	-0.29278	2.02766	4.82556	0.0280407	0.637007	Unchanged
ENSG00000259172	lncRNA	novel transcript, antisense to SNRPA1 and PCSK6	AC023024.1	0.374534	1.15791	4.78403	0.0287249	0.640361	Unchanged
ENSG00000273890	lncRNA	novel transcript, antisence to IKZF4	AC034102.8	1.34305	-1.76464	4.78449	0.0287172	0.640361	Unchanged
ENSG00000260853	lncRNA	novel transcript, antisense to NFATC2IP	AC109460.2	-1.43643	-1.8374	4.79076	0.0286129	0.640361	Unchanged
ENSG00000261168	lncRNA	novel transcript, sense overlapping SEMA6C	AL592424.1	-0.625928	-0.0783679	4.78903	0.0286415	0.640361	Unchanged
ENSG00000260470	lncRNA	novel transcript	AC023794.5	0.4764	0.308322	4.77419	0.0288895	0.640723	Unchanged
ENSG00000279786	TEC	TEC	AC105235.1	1.24162	-1.56452	4.76949	0.0289685	0.640723	Unchanged
ENSG00000259943	lncRNA	novel transcript, antisense to ZMPSTE24	AL050341.2	0.205048	3.1332	4.77713	0.0288401	0.640723	Unchanged
ENSG00000280385	TEC	novel transcript	AP000648.4	-0.532406	0.548267	4.7557	0.0292015	0.640723	Unchanged
ENSG00000239559	processed_pseudogene	ribosomal protein L37 pseudogene 2 [Source:HGNC Symbol;Acc:HGNC:17092]	RPL37P2	0.74008	-0.434191	4.76788	0.0289954	0.640723	Unchanged
ENSG00000185495	transcribed_unprocessed_pseudogene	septin 7 pseudogene 13 [Source:HGNC Symbol;Acc:HGNC:55092]	SEPTIN7P13	-0.235616	2.73584	4.76327	0.0290733	0.640723	Unchanged
ENSG00000199753	snoRNA	small nucleolar RNA, C/D box 104 [Source:HGNC Symbol;Acc:HGNC:32768]	SNORD104	0.438662	1.16218	4.76437	0.0290547	0.640723	Unchanged
ENSG00000272752	lncRNA	STAG3L5P-PVRIG2P-PILRB readthrough [Source:HGNC Symbol;Acc:HGNC:48898]	STAG3L5P-PVRIG2P-PILRB	1.13212	-1.29333	4.75749	0.0291711	0.640723	Unchanged
ENSG00000226781	processed_pseudogene	tubulin folding cofactor A pseudogene 1 [Source:HGNC Symbol;Acc:HGNC:42630]	TBCAP1	1.10778	-1.42257	4.76707	0.0290092	0.640723	Unchanged
ENSG00000246982	lncRNA	novel transcript, antisense to BRPF3	Z84485.1	0.634852	-0.451923	4.7771	0.0288406	0.640723	Unchanged
ENSG00000256651	unprocessed_pseudogene	taste receptor, type 2 pseudogene	AC006518.1	-0.481548	0.924771	4.73976	0.0294732	0.643726	Unchanged
ENSG00000259887	lncRNA	FIGNL2 divergent transcript [Source:HGNC Symbol;Acc:HGNC:53299]	FIGNL2-DT	0.724825	-0.801036	4.74244	0.0294274	0.643726	Unchanged
ENSG00000206846	misc_RNA	Y RNA [Source:RFAM;Acc:RF00019]	Y_RNA	1.05033	-0.930654	4.73938	0.0294797	0.643726	Unchanged
ENSG00000218418	processed_pseudogene	Rho GTPase activating protein 21 (ARHGAP21) pseudogene	AL591135.1	-1.22757	-1.55202	4.73455	0.0295626	0.644294	Unchanged
ENSG00000286519	lncRNA	novel transcript	AC009236.1	0.538546	0.252571	4.72349	0.0297533	0.644586	Unchanged
ENSG00000269001	transcribed_unprocessed_pseudogene	zinc finger protein 818, pseudogene	AC092070.2	-0.181348	3.99857	4.71732	0.0298603	0.644586	Unchanged
ENSG00000220305	processed_pseudogene	heterogeneous nuclear ribonucleoprotein H1 pseudogene 1 [Source:HGNC Symbol;Acc:HGNC:48751]	HNRNPH1P1	0.411603	1.2317	4.71126	0.0299656	0.645851	Unchanged
ENSG00000237977	processed_pseudogene	eukaryotic translation initiation factor 4H pseudogene 2 [Source:HGNC Symbol;Acc:HGNC:49036]	EIF4HP2	1.00537	-1.12804	4.70484	0.0300778	0.647332	Unchanged
ENSG00000276603	lncRNA	novel transcript, sense intronic to BLCAP	AL109614.1	1.01405	-0.742972	4.69657	0.0302229	0.647442	Unchanged
ENSG00000227960	lncRNA	novel transcript	AL138799.1	1.01211	-1.15577	4.66158	0.0308449	0.647442	Unchanged
ENSG00000284954	lncRNA	novel transcript	AL662884.3	0.803445	-0.915043	4.66253	0.0308278	0.647442	Unchanged
ENSG00000203761	unprocessed_pseudogene	misato family member 2, pseudogene [Source:HGNC Symbol;Acc:HGNC:26329]	MSTO2P	0.329073	2.04127	4.66365	0.0308076	0.647442	Unchanged
ENSG00000256092	lncRNA	SBNO1 antisense RNA 1 [Source:HGNC Symbol;Acc:HGNC:54355]	SBNO1-AS1	0.499562	0.354718	4.6834	0.0304554	0.647442	Unchanged
ENSG00000267414	lncRNA	SETBP1 divergent transcript [Source:HGNC Symbol;Acc:HGNC:54819]	SETBP1-DT	0.63322	-0.314485	4.69637	0.0302264	0.647442	Unchanged
ENSG00000268836	lncRNA	novel transcript	Z69706.1	0.808615	-0.602607	4.65648	0.0309366	0.647442	Unchanged
ENSG00000265625	lncRNA	novel transcript, sense intronic to SSH2	AC104564.5	-0.545543	0.128135	4.64334	0.0311743	0.648999	Unchanged
ENSG00000271993	lncRNA	novel transcript, antisense to LRRFIP2	AC126118.1	0.505377	0.453576	4.64341	0.031173	0.648999	Unchanged
ENSG00000204789	processed_pseudogene	zinc finger protein 204, pseudogene [Source:HGNC Symbol;Acc:HGNC:12995]	ZNF204P	-0.257745	2.2774	4.64711	0.0311058	0.648999	Unchanged
ENSG00000265478	lncRNA	novel transcript	AC107982.3	1.27523	-1.6546	4.63625	0.0313033	0.650104	Unchanged
ENSG00000230090	lncRNA	novel transcript	AC108025.1	0.699581	-0.335603	4.63167	0.0313871	0.650104	Unchanged
ENSG00000261338	lncRNA	novel transcript, overlapping to ARPC2 and GPBAR1	AC021016.1	0.572829	0.238828	4.6232	0.0315423	0.650339	Unchanged
ENSG00000200090	misc_RNA	Y RNA [Source:RFAM;Acc:RF00019]	Y_RNA	0.723705	-0.208671	4.61894	0.0316208	0.65058	Unchanged
ENSG00000258365	lncRNA	novel transcript, antisense to PLXNC1	AC073655.2	0.377832	1.2834	4.61052	0.0317763	0.651715	Unchanged
ENSG00000261019	lncRNA	novel transcript	AC010132.4	-0.478181	0.824917	4.60315	0.0319133	0.653104	Unchanged
ENSG00000268379	processed_pseudogene	pentatricopeptide repeat domain 3 pseudogene	AC025588.1	-0.334395	1.48353	4.60241	0.031927	0.653104	Unchanged
ENSG00000232492	processed_pseudogene	nucleophosmin 1 pseudogene 13 [Source:HGNC Symbol;Acc:HGNC:7915]	NPM1P13	-0.422136	0.862662	4.60147	0.0319446	0.653104	Unchanged
ENSG00000286652	lncRNA	novel transcript	AL021918.5	0.868785	-1.02228	4.58657	0.0322234	0.655462	Unchanged
ENSG00000231856	lncRNA	novel transcript	AL162377.1	0.401054	1.42	4.58996	0.0321597	0.655462	Unchanged
ENSG00000253395	lncRNA	novel transcript	AP003469.2	-1.14206	-1.72239	4.57973	0.0323523	0.655462	Unchanged
ENSG00000233937	lncRNA	uncharacterized LOC101928649 [Source:NCBI gene (formerly Entrezgene);Acc:101928649]	CTC-338M12.4	0.174193	3.78179	4.56531	0.0326258	0.655462	Unchanged
ENSG00000232472	processed_pseudogene	eukaryotic translation elongation factor 1 beta 2 pseudogene 3 [Source:HGNC Symbol;Acc:HGNC:3210]	EEF1B2P3	0.544343	0.487363	4.57614	0.0324202	0.655462	Unchanged
ENSG00000248174	lncRNA	long intergenic non-protein coding RNA 2268 [Source:HGNC Symbol;Acc:HGNC:53183]	LINC02268	-0.118343	5.47786	4.57489	0.0324438	0.655462	Unchanged
ENSG00000276337	lncRNA	novel transcript, sense intronic to ZCCHC14	AC105429.1	0.84138	-0.87599	4.55176	0.032885	0.656486	Unchanged
ENSG00000196922	transcribed_unprocessed_pseudogene	zinc finger protein 252, pseudogene [Source:HGNC Symbol;Acc:HGNC:13046]	ZNF252P	-0.0943626	6.32402	4.5491	0.0329361	0.656834	Unchanged
ENSG00000283023	unprocessed_pseudogene	FSHD region gene 1 family member G, pseudogene [Source:HGNC Symbol;Acc:HGNC:51766]	FRG1GP	0.22831	2.84803	4.54473	0.0330203	0.657432	Unchanged
ENSG00000284747	lncRNA	novel transcript, antisense to ERRFI1	AL034417.4	-0.647516	0.260935	4.53238	0.0332594	0.659232	Unchanged
ENSG00000269604	lncRNA	novel transcript, antisense to FEM1A	AC005523.2	-0.718117	-0.445112	4.50725	0.0337514	0.659555	Unchanged
ENSG00000235674	processed_pseudogene	lactate dehydrogenase A pseudogene 2 [Source:HGNC Symbol;Acc:HGNC:6537]	LDHAP2	-0.665154	-0.361971	4.5049	0.0337979	0.659555	Unchanged
ENSG00000267201	lncRNA	long intergenic non-protein coding RNA 1775 [Source:HGNC Symbol;Acc:HGNC:52565]	LINC01775	0.703415	-0.528433	4.50793	0.0337381	0.659555	Unchanged
ENSG00000197989	lncRNA	small nucleolar RNA host gene 12 [Source:HGNC Symbol;Acc:HGNC:30062]	SNHG12	0.203896	3.87606	4.51761	0.0335476	0.659555	Unchanged
ENSG00000278133	lncRNA	novel transcript, sense intronic to KAT8	AC135050.6	0.177789	3.6061	4.45305	0.0348391	0.660958	Unchanged
ENSG00000231466	processed_pseudogene	PHD finger protein 10 (PHF10) pseudogene	AL022324.2	-0.357966	1.39952	4.46214	0.0346541	0.660958	Unchanged
ENSG00000232934	lncRNA	novel transcript, antisense to ACSL5	AL157786.1	-1.22912	-1.42252	4.45489	0.0348014	0.660958	Unchanged
ENSG00000205771	transcribed_unprocessed_pseudogene	cation channel sperm associated 2 pseudogene 1 [Source:HGNC Symbol;Acc:HGNC:31054]	CATSPER2P1	-0.600018	-0.14614	4.47329	0.0344287	0.660958	Unchanged
ENSG00000227540	lncRNA	DNAJC9 antisense RNA 1 [Source:NCBI gene (formerly Entrezgene);Acc:414245]	DNAJC9-AS1	0.363186	1.36067	4.46238	0.0346492	0.660958	Unchanged
ENSG00000182366	lncRNA	family with sequence similarity 87 member A [Source:HGNC Symbol;Acc:HGNC:27233]	FAM87A	1.16815	-1.55228	4.45397	0.0348203	0.660958	Unchanged
ENSG00000248527	unprocessed_pseudogene	MT-ATP6 pseudogene 1 [Source:HGNC Symbol;Acc:HGNC:44575]	MTATP6P1	0.108734	9.14867	4.45691	0.0347604	0.660958	Unchanged
ENSG00000239213	lncRNA	NCK1 divergent transcript [Source:HGNC Symbol;Acc:HGNC:49645]	NCK1-DT	0.364685	1.0193	4.46412	0.034614	0.660958	Unchanged
ENSG00000106133	transcribed_unprocessed_pseudogene	NSUN5 pseudogene 2 [Source:HGNC Symbol;Acc:HGNC:16609]	NSUN5P2	0.233745	3.41439	4.46029	0.0346915	0.660958	Unchanged
ENSG00000238045	lncRNA	novel transcript, antisense to C16orf53 and MVP	AC009133.1	-0.508746	1.21958	4.43045	0.0353031	0.665872	Unchanged
ENSG00000285601	lncRNA	novel transcript	AC084262.2	0.503159	-0.156417	4.41962	0.035528	0.665915	Unchanged
ENSG00000231890	lncRNA	DARS1 antisense RNA 1 [Source:HGNC Symbol;Acc:HGNC:40170]	DARS1-AS1	0.43992	0.380048	4.42596	0.0353962	0.665915	Unchanged
ENSG00000204044	lncRNA	SLC12A5 and MMP9 antisense RNA 1 [Source:HGNC Symbol;Acc:HGNC:53143]	SLC12A5-AS1	0.316595	1.85746	4.40916	0.0357464	0.667533	Unchanged
ENSG00000212452	snoRNA	small nucleolar RNA, C/D box 69 [Source:HGNC Symbol;Acc:HGNC:32730]	SNORD69	-1.05032	-1.20337	4.39775	0.0359864	0.669046	Unchanged
ENSG00000274695	lncRNA	novel transcript	AC108704.1	0.955923	-1.29341	4.39182	0.0361117	0.669459	Unchanged
ENSG00000205334	lncRNA	long intergenic non-protein coding RNA 1460 [Source:HGNC Symbol;Acc:HGNC:50858]	LINC01460	-0.999778	-1.55222	4.38628	0.0362292	0.669651	Unchanged
ENSG00000207547	miRNA	microRNA 25 [Source:HGNC Symbol;Acc:HGNC:31609]	MIR25	0.5189	0.756161	4.38486	0.0362596	0.669651	Unchanged
ENSG00000285531	processed_pseudogene	LLP homolog, long-term synaptic facilitation ( LLPH) pseudogene	Z83840.1	0.64767	-0.278838	4.37855	0.036394	0.671202	Unchanged
ENSG00000227953	lncRNA	long intergenic non-protein coding RNA 1341 [Source:HGNC Symbol;Acc:HGNC:49457]	LINC01341	-0.241284	2.54635	4.36611	0.0366607	0.671541	Unchanged
ENSG00000233270	processed_pseudogene	SNRPE pseudogene 4 [Source:HGNC Symbol;Acc:HGNC:43446]	SNRPEP4	0.492167	0.400424	4.37067	0.0365627	0.671541	Unchanged
ENSG00000286669	lncRNA	novel transcript	AC008532.1	-0.919407	-1.26286	4.3587	0.0368204	0.671731	Unchanged
ENSG00000228242	lncRNA	XPC antisense RNA 1 [Source:HGNC Symbol;Acc:HGNC:55014]	XPC-AS1	-1.11877	-1.53988	4.33684	0.0372962	0.676903	Unchanged
ENSG00000276952	lncRNA	novel transcript, antisense to PYGB	AL121772.3	-0.875134	-0.987911	4.33093	0.0374257	0.677068	Unchanged
ENSG00000273403	lncRNA	novel transcript	AC107294.3	-0.955167	-1.26244	4.31256	0.0378319	0.677392	Unchanged
ENSG00000260948	lncRNA	novel transcript, sense overlapping WDR77 & OVGP1	AL390195.2	-0.539551	0.574842	4.30716	0.0379522	0.677392	Unchanged
ENSG00000249353	processed_pseudogene	nucleophosmin 1 pseudogene 27 [Source:HGNC Symbol;Acc:HGNC:45206]	NPM1P27	0.22849	3.04073	4.30658	0.0379651	0.677392	Unchanged
ENSG00000270673	lncRNA	YTHDF3 divergent transcript [Source:HGNC Symbol;Acc:HGNC:48728]	YTHDF3-AS1	1.08471	-1.59005	4.30704	0.0379549	0.677392	Unchanged
ENSG00000260107	lncRNA	novel transcript	AC005606.1	-1.14569	-1.65439	4.27361	0.0387086	0.67825	Unchanged
ENSG00000253659	lncRNA	novel transcript	AC138646.1	-0.273721	2.11213	4.27373	0.0387059	0.67825	Unchanged
ENSG00000250320	lncRNA	EDIL3 divergent transcript [Source:HGNC Symbol;Acc:HGNC:40204]	EDIL3-DT	-1.32844	-1.52767	4.24839	0.0392877	0.67825	Unchanged
ENSG00000224020	lncRNA	MIR181A2 host gene [Source:HGNC Symbol;Acc:HGNC:37188]	MIR181A2HG	0.370139	0.816467	4.2755	0.0386656	0.67825	Unchanged
ENSG00000188599	transcribed_unprocessed_pseudogene	nuclear pore complex interacting protein pseudogene 1 [Source:HGNC Symbol;Acc:HGNC:35407]	NPIPP1	-0.28443	2.13019	4.28785	0.0383857	0.67825	Unchanged
ENSG00000249264	processed_pseudogene	eukaryotic translation elongation factor 1 alpha 1 pseudogene 9 [Source:HGNC Symbol;Acc:HGNC:3204]	EEF1A1P9	0.42942	0.672445	4.2245	0.0398444	0.679797	Unchanged
ENSG00000229043	lncRNA	ZFAND2A divergent transcript [Source:HGNC Symbol;Acc:HGNC:41187]	ZFAND2A-DT	0.21681	2.88213	4.22589	0.0398119	0.679797	Unchanged
ENSG00000229057	processed_pseudogene	RPS3A pseudogene 54 [Source:HGNC Symbol;Acc:HGNC:49750]	RPS3AP54	-0.970293	-1.10058	4.22215	0.0398995	0.680142	Unchanged
ENSG00000259088	lncRNA	novel transcript, antisense to PPP2R5C	AL137779.2	0.839078	-1.31434	4.21694	0.0400222	0.681042	Unchanged
ENSG00000261514	lncRNA	long intergenic non-protein coding RNA 1976 [Source:HGNC Symbol;Acc:HGNC:52803]	LINC01976	1.16103	-1.48017	4.2086	0.0402194	0.681267	Unchanged
ENSG00000256341	lncRNA	novel transcript	AP006333.1	1.03695	-1.44542	4.2017	0.0403835	0.682373	Unchanged
ENSG00000283050	transcribed_unprocessed_pseudogene	general transcription factor IIi pseudogene 12 [Source:HGNC Symbol;Acc:HGNC:51723]	GTF2IP12	-0.15881	4.14974	4.1877	0.0407184	0.683009	Unchanged
ENSG00000230530	lncRNA	LIMD1 antisense RNA 1 [Source:HGNC Symbol;Acc:HGNC:44107]	LIMD1-AS1	-0.436139	1.00591	4.18741	0.0407252	0.683009	Unchanged
ENSG00000233593	lncRNA	long intergenic non-protein coding RNA 2609 [Source:HGNC Symbol;Acc:HGNC:27140]	LINC02609	-0.301498	1.76489	4.1866	0.0407448	0.683009	Unchanged
ENSG00000255857	lncRNA	PXN antisense RNA 1 [Source:HGNC Symbol;Acc:HGNC:44123]	PXN-AS1	0.228232	3.05084	4.18944	0.0406766	0.683009	Unchanged
ENSG00000273329	lncRNA	novel transcript	AC078846.1	0.157593	4.18898	4.16499	0.0412678	0.68489	Unchanged
ENSG00000198468	lncRNA	FLVCR1 divergent transcript [Source:HGNC Symbol;Acc:HGNC:39077]	FLVCR1-DT	0.208364	2.9126	4.17001	0.0411457	0.68489	Unchanged
ENSG00000201998	snoRNA	small nucleolar RNA, H/ACA box 23 [Source:HGNC Symbol;Acc:HGNC:32613]	SNORA23	1.14843	-1.38906	4.16347	0.0413047	0.684921	Unchanged
ENSG00000238098	transcribed_unitary_pseudogene	ATP binding cassette subfamily A member 17, pseudogene [Source:HGNC Symbol;Acc:HGNC:32972]	ABCA17P	0.740571	-0.602654	4.15851	0.0414258	0.685383	Unchanged
ENSG00000227165	lncRNA	WDR11 antisense RNA 1 [Source:HGNC Symbol;Acc:HGNC:27437]	WDR11-AS1	-0.550713	0.228107	4.15271	0.0415681	0.685785	Unchanged
ENSG00000170089	transcribed_unprocessed_pseudogene	THO complex 3 (THOC3) pseudogene	AC106795.1	0.235335	2.81167	4.1475	0.041696	0.685849	Unchanged
ENSG00000273186	lncRNA	novel transcript, sense intronic to CERCAM	AL359091.4	-1.02156	-1.27298	4.13434	0.0420215	0.689181	Unchanged
ENSG00000261123	lncRNA	novel transcript, intronic to PKD1	AC009065.5	0.658988	-0.0652133	4.11017	0.0426261	0.69096	Unchanged
ENSG00000262089	lncRNA	novel transcript	AC040977.1	0.740795	-0.571646	4.11814	0.0424256	0.69096	Unchanged
ENSG00000234884	lncRNA	novel transcript	AL022329.1	0.496536	0.127703	4.12083	0.0423584	0.69096	Unchanged
ENSG00000286787	lncRNA	novel transcript, antisense to PSMF1	AL110114.1	0.673907	-0.351056	4.12028	0.042372	0.69096	Unchanged
ENSG00000286162	lncRNA	novel transcript	AL162253.2	-0.677094	-0.674772	4.11143	0.0425943	0.69096	Unchanged
ENSG00000203497	lncRNA	PDCD4 antisense RNA 1 [Source:HGNC Symbol;Acc:HGNC:27425]	PDCD4-AS1	0.31696	1.38039	4.11016	0.0426264	0.69096	Unchanged
ENSG00000206954	snRNA	RNA, U6 small nuclear 1201, pseudogene [Source:HGNC Symbol;Acc:HGNC:48164]	RNU6-1201P	1.33388	-1.79321	4.12317	0.0422996	0.69096	Unchanged
ENSG00000130600	lncRNA	H19 imprinted maternally expressed transcript [Source:HGNC Symbol;Acc:HGNC:4713]	H19	-0.139109	6.61476	4.10572	0.0427385	0.692017	Unchanged
ENSG00000207425	misc_RNA	Y RNA [Source:RFAM;Acc:RF00019]	Y_RNA	1.26427	-1.65429	4.09795	0.0429353	0.694234	Unchanged
ENSG00000273004	lncRNA	novel transcript	AL078644.1	0.559768	0.378226	4.0819	0.0433448	0.697936	Unchanged
ENSG00000251363	lncRNA	long intergenic non-protein coding RNA 2315 [Source:HGNC Symbol;Acc:HGNC:53234]	LINC02315	0.834525	-1.16543	4.06878	0.0436828	0.701084	Unchanged
ENSG00000277369	lncRNA	novel transcript	AC010654.1	1.04639	-1.32462	4.03423	0.0445859	0.705042	Unchanged
ENSG00000205212	transcribed_unprocessed_pseudogene	CCDC144A N-terminal pseudogene [Source:HGNC Symbol;Acc:HGNC:33735]	CCDC144NL	-0.549453	-0.123585	4.05151	0.044132	0.705042	Unchanged
ENSG00000235908	lncRNA	RHOA intronic transcript 1 [Source:HGNC Symbol;Acc:HGNC:41308]	RHOA-IT1	1.0798	-1.38931	4.05066	0.0441542	0.705042	Unchanged
ENSG00000230146	processed_pseudogene	selenophosphate synthetase 1 pseudogene 4 [Source:HGNC Symbol;Acc:HGNC:42169]	SEPHS1P4	1.26496	-1.73598	4.02282	0.0448887	0.705042	Unchanged
ENSG00000280327	TEC	tec	Z97633.1	0.530067	0.00721795	4.03149	0.0446586	0.705042	Unchanged
ENSG00000259985	lncRNA	novel transcript, antisense to B4GALT6	AC017100.1	-0.442363	0.931092	4.01362	0.045134	0.706689	Unchanged
ENSG00000279641	TEC	TEC	AC120057.3	-0.758426	-0.922647	4.01204	0.0451765	0.706689	Unchanged
ENSG00000254634	unprocessed_pseudogene	SMG1 pseudogene 6 [Source:HGNC Symbol;Acc:HGNC:49863]	SMG1P6	0.544726	-0.0916344	4.01013	0.0452277	0.706689	Unchanged
ENSG00000286067	lncRNA	novel transcript, antisense to PXN	AC004263.2	0.707551	-0.457168	3.97833	0.0460892	0.709882	Unchanged
ENSG00000244538	processed_pseudogene	ribosomal protein S27 (RPS27) pseudogene	AC098583.1	0.530446	0.36771	3.97848	0.0460851	0.709882	Unchanged
ENSG00000288021	lncRNA	novel transcript	AL450338.2	-0.384837	1.27984	3.99248	0.0457036	0.709882	Unchanged
ENSG00000242697	processed_pseudogene	ribosomal protein L5 pseudogene 12 [Source:HGNC Symbol;Acc:HGNC:36221]	RPL5P12	-0.226223	2.33187	3.98005	0.0460421	0.709882	Unchanged
ENSG00000254860	lncRNA	TMEM9B antisense RNA 1 [Source:HGNC Symbol;Acc:HGNC:19230]	TMEM9B-AS1	-0.219654	2.92573	3.99215	0.0457128	0.709882	Unchanged
ENSG00000287918	lncRNA	novel transcript, antisense to VMA21	AF274853.1	0.766673	-0.808392	3.96458	0.0464671	0.710926	Unchanged
ENSG00000226578	lncRNA	novel transcript	AL132657.1	1.21685	-1.33471	3.9626	0.0465218	0.710926	Unchanged
ENSG00000286220	transcribed_unprocessed_pseudogene	purinergic receptor P2X, ligand-gated ion channel, 7 (P2RX7) pseudogene	AC007546.3	0.899998	-1.01319	3.96077	0.0465724	0.711142	Unchanged
ENSG00000185485	transcribed_unprocessed_pseudogene	succinate dehydrogenase complex flavoprotein subunit A pseudogene 1 [Source:HGNC Symbol;Acc:HGNC:32455]	SDHAP1	0.216209	2.94419	3.95459	0.0467438	0.712084	Unchanged
ENSG00000286447	lncRNA	novel transcript	AC109782.1	1.04539	-1.51579	3.94813	0.0469235	0.712598	Unchanged
ENSG00000273998	lncRNA	novel transcript	AL049794.1	-0.941672	-1.3779	3.94742	0.0469434	0.712598	Unchanged
ENSG00000203876	lncRNA	ADD3 antisense RNA 1 [Source:HGNC Symbol;Acc:HGNC:48682]	ADD3-AS1	-0.653991	-0.399819	3.93978	0.0471569	0.712618	Unchanged
ENSG00000257086	lncRNA	novel transcript	AP001453.2	-0.636947	-0.217909	3.92065	0.0476963	0.714513	Unchanged
ENSG00000228002	processed_pseudogene	DEAH-box helicase 9 pseudogene 1 [Source:HGNC Symbol;Acc:HGNC:2751]	DHX9P1	0.686505	-0.515921	3.90421	0.0481653	0.715554	Unchanged
ENSG00000270558	processed_pseudogene	chromobox homolog 3 (CBX3) pseudogene	AC025449.1	-0.463284	1.40472	3.89714	0.0483683	0.715572	Unchanged
ENSG00000279689	TEC	TEC	AC022400.7	-0.513456	-0.373271	3.89068	0.0485548	0.716377	Unchanged
ENSG00000229119	processed_pseudogene	60S acidic ribosomal protein (RPLP0) pseudogene	AC026403.1	0.820817	-0.570971	3.88861	0.0486147	0.716377	Unchanged
ENSG00000243406	transcribed_unprocessed_pseudogene	mitochondrial ribosomal protein S31 pseudogene 5 [Source:HGNC Symbol;Acc:HGNC:39253]	MRPS31P5	0.467527	0.663799	3.89185	0.048521	0.716377	Unchanged
ENSG00000272732	lncRNA	novel transcript	AC004982.1	0.438024	0.48925	3.87213	0.0490941	0.71782	Unchanged
ENSG00000260604	lncRNA	novel transcript	AL590004.3	-0.780387	-1.17465	3.87596	0.0489822	0.71782	Unchanged
ENSG00000249375	lncRNA	cancer susceptibility 11 [Source:HGNC Symbol;Acc:HGNC:48939]	CASC11	0.937033	-1.60263	3.87019	0.049151	0.71782	Unchanged
ENSG00000243680	processed_pseudogene	ribosomal protein L37 pseudogene 23 [Source:HGNC Symbol;Acc:HGNC:37003]	RPL37P23	0.897721	-1.35645	3.86819	0.0492097	0.71782	Unchanged
ENSG00000214465	processed_pseudogene	SWI/SNF related, matrix associated, actin dependent regulator of chromatin, subfamily e, member 1 pseudogene 6 [Source:HGNC Symbol;Acc:HGNC:39737]	SMARCE1P6	-0.93638	-1.32433	3.86782	0.0492203	0.71782	Unchanged
ENSG00000286084	lncRNA	novel transcript	AL096794.1	1.07028	-1.77883	3.85664	0.0495494	0.718853	Unchanged
ENSG00000267138	lncRNA	novel transcript, sense intronic to APBA3	AC005954.1	1.21487	-1.66761	3.83819	0.0500977	0.719605	Unchanged
ENSG00000198580	unprocessed_pseudogene	zinc finger protein pseudogene	AC073343.1	-0.212953	2.63291	3.85126	0.0497085	0.719605	Unchanged
ENSG00000286729	lncRNA	novel transcript, antisense to COPG1	AC137695.3	-1.07604	-1.53986	3.83887	0.0500772	0.719605	Unchanged
ENSG00000273262	lncRNA	novel transcript, antisense to ACTR1A	AL121928.1	-1.10145	-1.0042	3.84266	0.0499642	0.719605	Unchanged
ENSG00000239415	lncRNA	novel transcript, antisense to MCM3APAS	AP001469.3	0.811855	-0.400257	3.8333	0.050244	0.719605	Unchanged
ENSG00000227347	processed_pseudogene	heterogeneous nuclear ribonucleoprotein K pseudogene 2 [Source:HGNC Symbol;Acc:HGNC:42375]	HNRNPKP2	0.473379	0.619087	3.85155	0.0496999	0.719605	Unchanged
ENSG00000235508	processed_pseudogene	ribosomal protein S2 pseudogene 7 [Source:HGNC Symbol;Acc:HGNC:15838]	RPS2P7	1.27812	-1.94673	3.84513	0.0498906	0.719605	Unchanged
ENSG00000206895	misc_RNA	Y RNA [Source:RFAM;Acc:RF00019]	Y_RNA	0.906717	-1.12781	3.83365	0.0502335	0.719605	Unchanged
ENSG00000260816	lncRNA	novel transcript, sense intronic to WWOX	AC027279.1	1.15904	-0.938624	3.82936	0.0503622	0.720453	Unchanged
ENSG00000287646	lncRNA	novel transcript, antisense to RTTN	AC021701.1	-1.14077	-1.75026	3.81969	0.0506536	0.722651	Unchanged
ENSG00000287578	lncRNA	novel transcript	AL034348.1	0.561125	-0.223426	3.81626	0.0507574	0.722651	Unchanged
ENSG00000287966	lncRNA	novel transcript	AL590062.1	-0.427272	0.418829	3.81566	0.0507755	0.722651	Unchanged
ENSG00000259448	lncRNA	long intergenic non-protein coding RNA 2352 [Source:HGNC Symbol;Acc:HGNC:53274]	LINC02352	0.429758	0.175757	3.81587	0.0507693	0.722651	Unchanged
ENSG00000237877	lncRNA	long intergenic non-protein coding RNA 1473 [Source:HGNC Symbol;Acc:HGNC:51109]	LINC01473	-0.476904	0.00379807	3.8138	0.0508321	0.722929	Unchanged
ENSG00000216895	lncRNA	novel transcript, antisense to RBM33	AC009403.1	0.297808	1.70685	3.80078	0.0512287	0.723637	Unchanged
ENSG00000231290	lncRNA	APCDD1L divergent transcript [Source:HGNC Symbol;Acc:HGNC:27152]	APCDD1L-DT	-0.81658	-0.845158	3.81063	0.0509283	0.723637	Unchanged
ENSG00000224316	unprocessed_pseudogene	general transcription factor IIi pseudogene 5 [Source:HGNC Symbol;Acc:HGNC:51717]	GTF2IP5	0.428462	0.403024	3.80717	0.0510336	0.723637	Unchanged
ENSG00000269893	lncRNA	small nucleolar RNA host gene 8 [Source:HGNC Symbol;Acc:HGNC:33098]	SNHG8	0.125075	4.81703	3.79998	0.0512533	0.723637	Unchanged
ENSG00000265148	lncRNA	TSPOAP1, SUPT4H1 and RNF43 antisense RNA 1 [Source:HGNC Symbol;Acc:HGNC:44148]	TSPOAP1-AS1	0.338692	1.5315	3.80158	0.0512044	0.723637	Unchanged
ENSG00000272106	lncRNA	artifact	AL691432.2	0.17692	3.41522	3.77812	0.0519269	0.727873	Unchanged
ENSG00000248840	transcribed_processed_pseudogene	X antigen family, member 5 (XAGE5) pseudogene	AL645949.1	0.764233	-1.00493	3.7713	0.0521391	0.729798	Unchanged
ENSG00000273355	lncRNA	novel transcript	AP000894.4	-0.96575	-1.28265	3.7699	0.0521828	0.729885	Unchanged
ENSG00000270607	lncRNA	NAV2 antisense RNA 6 [Source:HGNC Symbol;Acc:HGNC:55264]	AC009549.1	-0.372043	1.24854	3.75593	0.0526206	0.732354	Unchanged
ENSG00000214999	lncRNA	novel transcript, antisense to ALOX12B	AC129492.1	0.427914	0.637428	3.7549	0.0526528	0.732354	Unchanged
ENSG00000285517	lncRNA	long intergenic non-protein coding RNA 941	AC010198.2	-0.886113	-1.10952	3.73509	0.0532808	0.734174	Unchanged
ENSG00000280163	TEC	novel transcript	AC040160.2	-0.606036	-0.509904	3.73625	0.0532439	0.734174	Unchanged
ENSG00000273179	lncRNA	novel transcript, antisense to SPON2	AC092535.5	-1.12944	-1.47986	3.73823	0.0531807	0.734174	Unchanged
ENSG00000226268	processed_pseudogene	solute carrier family 25, member 33 (SLC25A33) pseudogene	AC135977.1	1.2111	-1.79307	3.73804	0.0531868	0.734174	Unchanged
ENSG00000228981	processed_pseudogene	ribosomal protein S2 (RPS2) pseudogene	AC097658.1	1.09828	-1.69471	3.7264	0.0535588	0.735305	Unchanged
ENSG00000248498	transcribed_unprocessed_pseudogene	asparagine synthetase pseudogene 1 [Source:HGNC Symbol;Acc:HGNC:754]	ASNSP1	0.276238	2.27393	3.72779	0.0535141	0.735305	Unchanged
ENSG00000224358	lncRNA	TMCO1 antisense RNA 1 [Source:HGNC Symbol;Acc:HGNC:54046]	TMCO1-AS1	-0.294319	1.46886	3.72387	0.0536398	0.735305	Unchanged
ENSG00000278917	TEC	TEC	AC006213.6	-0.455653	0.032484	3.71246	0.0540077	0.738446	Unchanged
ENSG00000277218	lncRNA	novel transcript	AL139123.1	0.967735	-1.17489	3.70815	0.0541475	0.739188	Unchanged
ENSG00000204092	lncRNA	long intergenic non-protein coding RNA 951 [Source:HGNC Symbol;Acc:HGNC:48662]	LINC00951	0.537828	0.253842	3.69562	0.0545556	0.740989	Unchanged
ENSG00000279425	TEC	TEC	AC092279.2	0.328698	1.99567	3.685	0.0549041	0.742367	Unchanged
ENSG00000261067	lncRNA	novel transcript	AC109460.3	0.681056	-0.883286	3.68636	0.0548594	0.742367	Unchanged
ENSG00000287243	lncRNA	thyroid cancer-associated transcript 155 [Source:NCBI gene (formerly Entrezgene);Acc:100129223]	THCAT155	1.05528	-1.69491	3.68588	0.054875	0.742367	Unchanged
ENSG00000207739	miRNA	microRNA 218-2 [Source:HGNC Symbol;Acc:HGNC:31596]	MIR218-2	1.05844	-1.35646	3.6803	0.055059	0.742915	Unchanged
ENSG00000279250	TEC	TEC	AC022919.1	0.989962	-1.97988	3.67838	0.0551223	0.743255	Unchanged
ENSG00000281026	lncRNA	N4BPL2 intronic transcript 2 [Source:HGNC Symbol;Acc:HGNC:25038]	N4BP2L2-IT2	-0.276833	2.23416	3.66806	0.0554646	0.746321	Unchanged
ENSG00000247828	lncRNA	TMEM161B antisense RNA 1 [Source:HGNC Symbol;Acc:HGNC:43839]	TMEM161B-AS1	0.121957	5.84207	3.66173	0.0556759	0.7471	Unchanged
ENSG00000263235	lncRNA	novel transcript, sense overlapping TRAP1	AC006111.2	0.438112	1.07161	3.64845	0.0561214	0.750881	Unchanged
ENSG00000244513	lncRNA	novel transcript	AC109587.1	-0.696254	-0.539655	3.64531	0.0562275	0.750881	Unchanged
ENSG00000267131	lncRNA	novel transcript, antisense to BCAS3	AC005746.2	0.387217	0.962614	3.63803	0.0564739	0.750997	Unchanged
ENSG00000240106	misc_RNA	RNA, 7SL, cytoplasmic 146, pseudogene [Source:HGNC Symbol;Acc:HGNC:46162]	RN7SL146P	0.995783	-1.34565	3.63386	0.0566155	0.750997	Unchanged
ENSG00000269982	lncRNA	novel transcript, antisense to TMEM111	AC018809.2	-0.534413	0.264332	3.62031	0.0570781	0.751028	Unchanged
ENSG00000235636	processed_pseudogene	NUS1 pseudogene 1 [Source:HGNC Symbol;Acc:HGNC:38472]	NUS1P1	-0.961293	-1.18379	3.62753	0.0568311	0.751028	Unchanged
ENSG00000273243	lncRNA	novel transcript	Z82243.1	0.589909	-0.0298934	3.62051	0.0570715	0.751028	Unchanged
ENSG00000257818	processed_pseudogene	C1GALT1 pseudogene 1 [Source:HGNC Symbol;Acc:HGNC:51614]	C1GALT1P1	0.904243	-1.57737	3.60856	0.0574829	0.751515	Unchanged
ENSG00000225630	unprocessed_pseudogene	MT-ND2 pseudogene 28 [Source:HGNC Symbol;Acc:HGNC:42129]	MTND2P28	0.0925776	6.85217	3.6089	0.057471	0.751515	Unchanged
ENSG00000178082	processed_pseudogene	twinfilin 1 pseudogene 1 [Source:HGNC Symbol;Acc:HGNC:21736]	TWF1P1	-0.526127	-0.0611047	3.60668	0.0575477	0.751515	Unchanged
ENSG00000267298	lncRNA	novel transcript, sense intronic to ZSCAN5A	AC006116.5	0.911593	-1.3892	3.60169	0.057721	0.751576	Unchanged
ENSG00000285581	lncRNA	novel transcript	AC091196.1	1.11156	-1.42235	3.60353	0.0576571	0.751576	Unchanged
ENSG00000272335	lncRNA	novel transcript	AC093297.2	-0.164472	3.5153	3.59766	0.057861	0.751576	Unchanged
ENSG00000249122	lncRNA	novel transcript	AC105389.1	0.620445	-0.273439	3.60029	0.0577694	0.751576	Unchanged
ENSG00000260293	lncRNA	novel transcript, intronic to TBC1D24	AC106820.4	0.137746	4.7842	3.60169	0.0577208	0.751576	Unchanged
ENSG00000286379	lncRNA	novel transcript	AL591845.1	-0.527841	-0.123411	3.57308	0.0587234	0.753885	Unchanged
ENSG00000228288	lncRNA	prostate cancer associated transcript 6 [Source:HGNC Symbol;Acc:HGNC:43714]	PCAT6	0.319099	1.12133	3.57502	0.0586549	0.753885	Unchanged
ENSG00000278472	lncRNA	novel transcript, sense intronic to AVEN	AC009268.2	-1.14061	-1.7643	3.56192	0.0591194	0.75574	Unchanged
ENSG00000271936	lncRNA	novel transcript, antisense to ADCY3	AC012073.1	0.232282	2.94221	3.53958	0.0599205	0.758663	Unchanged
ENSG00000223583	processed_pseudogene	ribosomal protein L17 (RPL17) pseudogene	AL513365.1	-0.810601	-1.07378	3.54609	0.0596861	0.758663	Unchanged
ENSG00000272458	miRNA	microRNA 432 [Source:HGNC Symbol;Acc:HGNC:32083]	MIR432	-0.869102	-1.19388	3.53192	0.060198	0.760142	Unchanged
ENSG00000257607	lncRNA	novel transcript, antisense to GPR146	AC073957.2	0.618627	-0.0388097	3.51516	0.0608097	0.760795	Unchanged
ENSG00000230773	lncRNA	novel transcript	AC092650.1	0.730745	-0.860529	3.52485	0.0604552	0.760795	Unchanged
ENSG00000273002	lncRNA	ARHGEF2 antisense RNA 2 [Source:HGNC Symbol;Acc:HGNC:55175]	ARHGEF2-AS2	-0.531486	-0.340788	3.51446	0.0608355	0.760795	Unchanged
ENSG00000226891	lncRNA	long intergenic non-protein coding RNA 1359 [Source:HGNC Symbol;Acc:HGNC:50591]	LINC01359	0.399902	0.868723	3.52823	0.0603321	0.760795	Unchanged
ENSG00000235823	lncRNA	oligodendrocyte maturation-associated long intergenic non-coding RNA [Source:HGNC Symbol;Acc:HGNC:28060]	OLMALINC	-0.146143	4.35549	3.52556	0.0604294	0.760795	Unchanged
ENSG00000224086	lncRNA	PPM1F antisense RNA 1 [Source:HGNC Symbol;Acc:HGNC:40888]	PPM1F-AS1	0.304247	1.34121	3.49461	0.061569	0.765546	Unchanged
ENSG00000226746	lncRNA	Smith-Magenis syndrome chromosome region, candidate 5 [Source:HGNC Symbol;Acc:HGNC:17918]	SMCR5	0.982821	-1.68136	3.49009	0.0617372	0.765761	Unchanged
ENSG00000256546	lncRNA	novel transcript	AC156455.1	0.542212	0.112216	3.48272	0.0620126	0.766534	Unchanged
ENSG00000245384	lncRNA	CXXC4 antisense RNA 1 [Source:HGNC Symbol;Acc:HGNC:41054]	CXXC4-AS1	0.900633	-0.814719	3.48556	0.0619062	0.766534	Unchanged
ENSG00000263753	lncRNA	long intergenic non-protein coding RNA 667 [Source:HGNC Symbol;Acc:HGNC:27906]	LINC00667	0.0863036	5.49035	3.48137	0.0620634	0.766534	Unchanged
ENSG00000278771	misc_RNA	RNA component of signal recognition particle 7SL3 [Source:HGNC Symbol;Acc:HGNC:23135]	RN7SL3	1.03836	-1.50401	3.4568	0.0629919	0.771376	Unchanged
ENSG00000267280	lncRNA	TBX2 antisense RNA 1 [Source:HGNC Symbol;Acc:HGNC:50355]	TBX2-AS1	0.134393	4.17947	3.45384	0.0631049	0.771376	Unchanged
ENSG00000203288	lncRNA	TDRKH antisense RNA 1 [Source:HGNC Symbol;Acc:HGNC:40578]	TDRKH-AS1	0.27129	1.82779	3.45297	0.0631382	0.771376	Unchanged
ENSG00000269918	lncRNA	novel transcript	AF131215.6	0.18618	3.09409	3.44934	0.0632771	0.771521	Unchanged
ENSG00000260743	lncRNA	novel transcript	AC007823.1	0.718364	-0.366959	3.44588	0.0634097	0.771694	Unchanged
ENSG00000229980	lncRNA	TOB1 antisense RNA 1 [Source:HGNC Symbol;Acc:HGNC:44340]	TOB1-AS1	0.305719	1.17414	3.44491	0.0634469	0.771694	Unchanged
ENSG00000206192	unprocessed_pseudogene	ankyrin repeat domain 20 family member A9, pseudogene [Source:HGNC Symbol;Acc:HGNC:42023]	ANKRD20A9P	0.919076	-1.48021	3.43997	0.0636367	0.772292	Unchanged
ENSG00000263818	transcribed_processed_pseudogene	RDM1 pseudogene 5 [Source:HGNC Symbol;Acc:HGNC:53921]	RDM1P5	0.382433	1.00712	3.44132	0.0635849	0.772292	Unchanged
ENSG00000279591	TEC	novel transcript	AC002044.2	0.872721	-1.48011	3.42901	0.0640605	0.772585	Unchanged
ENSG00000207751	lncRNA	novel transcript	AP000553.1	-0.467456	0.426331	3.42575	0.0641871	0.772585	Unchanged
ENSG00000230583	transcribed_unprocessed_pseudogene	GTF2I repeat domain containing 1 pseudogene 1 [Source:HGNC Symbol;Acc:HGNC:44136]	GTF2IRD1P1	-1.00083	-1.65424	3.42826	0.0640896	0.772585	Unchanged
ENSG00000228903	transcribed_unprocessed_pseudogene	RAS p21 protein activator 4C, pseudogene [Source:HGNC Symbol;Acc:HGNC:44185]	RASA4CP	-0.368355	0.762387	3.42984	0.0640281	0.772585	Unchanged
ENSG00000279977	TEC	TEC	AC008764.10	0.824729	-1.15601	3.40467	0.065012	0.772788	Unchanged
ENSG00000258454	lncRNA	novel transcript, sense overlapping GPATCH2L	AC016526.2	-0.809801	-1.05592	3.38354	0.0658503	0.772788	Unchanged
ENSG00000256973	lncRNA	novel transcript	AC053513.2	-0.30479	1.61505	3.38284	0.0658783	0.772788	Unchanged
ENSG00000235530	lncRNA	novel transcript, antisense to TMEM11	AC087294.1	0.52416	0.49372	3.37983	0.0659987	0.772788	Unchanged
ENSG00000259707	processed_pseudogene	serine/arginine-rich splicing factor 9 (SRSF9) pseudogene	AC105339.4	0.504783	0.835107	3.38023	0.0659827	0.772788	Unchanged
ENSG00000285664	lncRNA	novel transcript, antisense to FERMT2	AL139317.5	0.654118	-0.522153	3.39671	0.0653264	0.772788	Unchanged
ENSG00000273026	lncRNA	novel transcript, antisense to SLC39A1	AL358472.3	0.507766	-0.100837	3.41106	0.064761	0.772788	Unchanged
ENSG00000270115	lncRNA	novel transcript	AL513327.2	-0.401294	0.409327	3.4121	0.0647199	0.772788	Unchanged
ENSG00000259516	transcribed_processed_pseudogene	acidic nuclear phosphoprotein 32 family member A pseudogene 1 [Source:HGNC Symbol;Acc:HGNC:42949]	ANP32AP1	0.848829	-1.43425	3.41449	0.0646264	0.772788	Unchanged
ENSG00000243701	lncRNA	DPPA2 upstream binding RNA [Source:HGNC Symbol;Acc:HGNC:48569]	DUBR	-0.141813	3.97768	3.39105	0.0655513	0.772788	Unchanged
ENSG00000214182	transcribed_processed_pseudogene	prothymosin alpha pseudogene 5 [Source:HGNC Symbol;Acc:HGNC:9628]	PTMAP5	0.258757	2.24087	3.38119	0.0659444	0.772788	Unchanged
ENSG00000249947	processed_pseudogene	X-box binding protein 1 pseudogene 1 [Source:HGNC Symbol;Acc:HGNC:12802]	XBP1P1	1.13851	-1.69461	3.38352	0.0658513	0.772788	Unchanged
ENSG00000273428	lncRNA	novel transcript	AC004832.6	0.726181	-0.891307	3.3744	0.0662168	0.774876	Unchanged
ENSG00000226976	processed_pseudogene	cytochrome c oxidase subunit 6A1 pseudogene 2 [Source:HGNC Symbol;Acc:HGNC:35239]	COX6A1P2	-0.649557	-0.174161	3.36123	0.0667484	0.776799	Unchanged
ENSG00000235244	lncRNA	DXZ4 associated non-coding transcript 2, distal [Source:HGNC Symbol;Acc:HGNC:50862]	DANT2	-0.274623	2.61448	3.36375	0.0666462	0.776799	Unchanged
ENSG00000262001	lncRNA	DLGAP1 antisense RNA 2 [Source:HGNC Symbol;Acc:HGNC:28146]	DLGAP1-AS2	0.385793	0.244883	3.36725	0.0665047	0.776799	Unchanged
ENSG00000262468	lncRNA	long intergenic non-protein coding RNA 1569 [Source:HGNC Symbol;Acc:HGNC:51380]	LINC01569	-0.434817	0.390732	3.36084	0.066764	0.776799	Unchanged
ENSG00000279265	TEC	TEC	AC000123.2	-0.273012	2.07767	3.35088	0.0671692	0.77833	Unchanged
ENSG00000226950	lncRNA	differentiation antagonizing non-protein coding RNA [Source:HGNC Symbol;Acc:HGNC:28964]	DANCR	0.0912096	5.26935	3.34861	0.0672619	0.77833	Unchanged
ENSG00000226098	processed_pseudogene	SEC11 homolog B, signal peptidase complex subunit (pseudogene) [Source:HGNC Symbol;Acc:HGNC:31884]	SEC11B	-1.07109	-1.86793	3.3514	0.0671479	0.77833	Unchanged
ENSG00000201573	misc_RNA	Y RNA [Source:RFAM;Acc:RF00019]	Y_RNA	-1.4131	-1.94668	3.34489	0.0674138	0.77833	Unchanged
ENSG00000230092	transcribed_unprocessed_pseudogene	F-box only protein 25 (FBXO25) pseudogene	AL669831.4	0.857382	-1.35662	3.33947	0.0676363	0.778857	Unchanged
ENSG00000258884	lncRNA	long intergenic non-protein coding RNA 2321 [Source:HGNC Symbol;Acc:HGNC:53240]	LINC02321	-1.05656	-1.75011	3.33661	0.0677541	0.779753	Unchanged
ENSG00000228423	lncRNA	novel transcript	AL357552.2	0.982776	-0.800551	3.33447	0.0678421	0.780304	Unchanged
ENSG00000230417	lncRNA	long intergenic non-protein coding RNA 856 [Source:HGNC Symbol;Acc:HGNC:45111]	LINC00595	0.616036	-0.722238	3.32975	0.0680372	0.780705	Unchanged
ENSG00000286503	lncRNA	novel transcript	AC008462.1	1.02732	-1.68119	3.32755	0.0681282	0.780726	Unchanged
ENSG00000267383	lncRNA	novel transcript, antisense to ZNF486 and ZNF90	AC011447.3	0.228476	3.24819	3.32519	0.068226	0.780726	Unchanged
ENSG00000287720	lncRNA	novel transcript, antisense to SUMF1	AC023480.1	-1.23096	-1.80796	3.32514	0.0682282	0.780726	Unchanged
ENSG00000224094	processed_pseudogene	ribosomal protein S24 pseudogene 8 [Source:HGNC Symbol;Acc:HGNC:37016]	RPS24P8	-0.813753	-0.890725	3.32294	0.0683195	0.780726	Unchanged
ENSG00000237954	lncRNA	novel transcript	AL445218.1	-0.925636	-1.7221	3.31843	0.0685072	0.781953	Unchanged
ENSG00000213754	processed_pseudogene	KPNA4 pseudogene 1 [Source:HGNC Symbol;Acc:HGNC:54976]	KPNA4P1	-1.008	-1.62815	3.31361	0.0687084	0.782228	Unchanged
ENSG00000253686	lncRNA	long intergenic non-protein coding RNA 1484 [Source:HGNC Symbol;Acc:HGNC:51136]	LINC01484	-0.952403	-1.72191	3.31377	0.0687017	0.782228	Unchanged
ENSG00000229807	lncRNA	X inactive specific transcript [Source:HGNC Symbol;Acc:HGNC:12810]	XIST	-0.079719	11.1113	3.31259	0.068751	0.782228	Unchanged
ENSG00000267469	lncRNA	novel transcript, antisense to TLE5	AC005944.1	-0.581139	0.246702	3.23276	0.072179	0.782824	Unchanged
ENSG00000279799	TEC	TEC	AC006077.2	0.594781	-0.641378	3.28333	0.0699869	0.782824	Unchanged
ENSG00000286721	lncRNA	novel transcript	AC010623.1	-0.501872	-0.298715	3.23227	0.0722004	0.782824	Unchanged
ENSG00000280374	lncRNA	novel transcript	AC019080.5	-0.370851	1.0536	3.2125	0.0730776	0.782824	Unchanged
ENSG00000279861	TEC	TEC	AC073548.1	0.607967	-0.462473	3.21413	0.0730049	0.782824	Unchanged
ENSG00000267397	lncRNA	novel transcript	AC090229.1	0.439429	1.12032	3.24671	0.071567	0.782824	Unchanged
ENSG00000286626	lncRNA	novel transcript, antisense to CAPRIN1	AC090469.1	0.851702	-1.43375	3.26387	0.0708217	0.782824	Unchanged
ENSG00000275345	lncRNA	novel transcript	AC091167.5	-0.736814	-0.564008	3.2315	0.0722344	0.782824	Unchanged
ENSG00000273245	lncRNA	novel transcript	AC092653.1	0.999369	-1.41152	3.26137	0.0709297	0.782824	Unchanged
ENSG00000271414	processed_pseudogene	MYC associated factor X, pseudogene	AC093107.2	1.03467	-1.61526	3.25044	0.0714045	0.782824	Unchanged
ENSG00000286585	lncRNA	novel transcript	AC104472.4	0.991973	-1.77908	3.23712	0.0719869	0.782824	Unchanged
ENSG00000279469	TEC	TEC	AC109454.4	0.853682	-1.21336	3.23337	0.0721519	0.782824	Unchanged
ENSG00000246596	transcribed_unprocessed_pseudogene	SUMO interacting motifs containing 1 (SIMC1) pseudogene	AC139795.1	-0.144344	3.85871	3.22282	0.0726185	0.782824	Unchanged
ENSG00000276728	lncRNA	novel transcript	AC142472.1	0.377136	0.645177	3.3035	0.0691324	0.782824	Unchanged
ENSG00000274615	unprocessed_pseudogene	aminopeptidase puromycin sensitive (NPEPPS) pseudogene	AC233968.1	1.23982	-1.75005	3.23395	0.0721266	0.782824	Unchanged
ENSG00000280336	lncRNA	novel transcript	AC244517.12	-1.06423	-1.68105	3.21841	0.0728144	0.782824	Unchanged
ENSG00000213493	processed_pseudogene	actinin alpha 4 pseudogene 1 [Source:HGNC Symbol;Acc:HGNC:44028]	ACTN4P1	-1.41994	-1.8989	3.22048	0.0727223	0.782824	Unchanged
ENSG00000286257	lncRNA	novel transcript	AL137100.3	0.844404	-1.03051	3.22956	0.0723203	0.782824	Unchanged
ENSG00000235605	processed_pseudogene	ribosomal protein S15 (RPS15) pseudogene	AL355472.1	0.417035	0.551556	3.23579	0.0720457	0.782824	Unchanged
ENSG00000271754	lncRNA	novel transcript, antisense to POLR1C	AL355802.3	0.593452	-0.222832	3.26993	0.0705607	0.782824	Unchanged
ENSG00000282885	lncRNA	novel transcript	AL627171.2	-0.713221	-1.18399	3.27361	0.0704026	0.782824	Unchanged
ENSG00000272973	lncRNA	novel transcript, antisense to SLC2A11	AP000350.5	-0.927067	-1.72249	3.23835	0.0719332	0.782824	Unchanged
ENSG00000280543	lncRNA	ASAP1 intronic transcript 2 [Source:HGNC Symbol;Acc:HGNC:48917]	ASAP1-IT2	0.696237	0.12824	3.27441	0.0703681	0.782824	Unchanged
ENSG00000270419	lncRNA	colon adenocarcinoma hypermethylated [Source:HGNC Symbol;Acc:HGNC:42860]	CAHM	0.55811	-0.368065	3.25264	0.0713084	0.782824	Unchanged
ENSG00000213261	processed_pseudogene	eukaryotic translation elongation factor 1 beta 2 pseudogene 6 [Source:HGNC Symbol;Acc:HGNC:51453]	EEF1B2P6	0.31146	1.68449	3.2847	0.0699285	0.782824	Unchanged
ENSG00000235590	lncRNA	GNAS antisense RNA 1 [Source:HGNC Symbol;Acc:HGNC:24872]	GNAS-AS1	0.366226	1.60644	3.22353	0.0725869	0.782824	Unchanged
ENSG00000251557	transcribed_processed_pseudogene	heterogeneous nuclear ribonucleoprotein K pseudogene 3 [Source:HGNC Symbol;Acc:HGNC:42376]	HNRNPKP3	-1.05818	-1.82278	3.24025	0.0718495	0.782824	Unchanged
ENSG00000164669	transcribed_unprocessed_pseudogene	integrator complex subunit 4 pseudogene 1 [Source:HGNC Symbol;Acc:HGNC:21925]	INTS4P1	-0.676885	-0.890906	3.24521	0.0716325	0.782824	Unchanged
ENSG00000239569	lncRNA	KMT2E antisense RNA 1 [Source:HGNC Symbol;Acc:HGNC:40845]	KMT2E-AS1	0.385765	0.850802	3.30689	0.0689901	0.782824	Unchanged
ENSG00000234183	lncRNA	long intergenic non-protein coding RNA 1952 [Source:HGNC Symbol;Acc:HGNC:52775]	LINC01952	1.02689	-1.65458	3.20741	0.0733055	0.782824	Unchanged
ENSG00000268883	unprocessed_pseudogene	PNMA family member 6B (pseudogene) [Source:HGNC Symbol;Acc:HGNC:26681]	PNMA6B	-0.91948	-1.53984	3.26966	0.0705722	0.782824	Unchanged
ENSG00000245275	lncRNA	SAP30L antisense RNA 1 (head to head) [Source:HGNC Symbol;Acc:HGNC:26760]	SAP30L-AS1	0.366331	1.58609	3.2133	0.0730419	0.782824	Unchanged
ENSG00000234494	lncRNA	SP2 antisense RNA 1 [Source:HGNC Symbol;Acc:HGNC:51341]	SP2-AS1	-0.194155	3.13198	3.24111	0.0718118	0.782824	Unchanged
ENSG00000270923	processed_pseudogene	taste 2 receptor member 6 pseudogene [Source:HGNC Symbol;Acc:HGNC:20616]	TAS2R6P	-0.511899	0.228995	3.2404	0.071843	0.782824	Unchanged
ENSG00000206573	lncRNA	THUMPD3 antisense RNA 1 [Source:HGNC Symbol;Acc:HGNC:44478]	THUMPD3-AS1	0.103644	5.31084	3.30148	0.0692174	0.782824	Unchanged
ENSG00000255248	lncRNA	mir-100-let-7a-2-mir-125b-1 cluster host gene [Source:HGNC Symbol;Acc:HGNC:39522]	MIR100HG	0.137324	3.50827	3.19144	0.0740247	0.784164	Unchanged
ENSG00000256940	lncRNA	PPP1R14B antisense RNA 1 [Source:HGNC Symbol;Acc:HGNC:54233]	PPP1R14B-AS1	0.813254	-1.1557	3.19051	0.0740667	0.784164	Unchanged
ENSG00000221539	snoRNA	small nucleolar RNA, C/D box 99 [Source:HGNC Symbol;Acc:HGNC:32762]	SNORD99	-0.789154	-0.742757	3.19187	0.0740053	0.784164	Unchanged
ENSG00000234233	lncRNA	KCNH1 intronic transcript 1 [Source:HGNC Symbol;Acc:HGNC:41351]	KCNH1-IT1	0.492881	-0.257965	3.17225	0.0748994	0.78501	Unchanged
ENSG00000265996	miRNA	microRNA 3671 [Source:HGNC Symbol;Acc:HGNC:38925]	MIR3671	-0.945358	-1.60249	3.17191	0.0749148	0.78501	Unchanged
ENSG00000179571	unprocessed_pseudogene	NBPF member 17, pseudogene [Source:HGNC Symbol;Acc:HGNC:31997]	NBPF17P	0.911659	-1.3568	3.17611	0.0747223	0.78501	Unchanged
ENSG00000237624	unprocessed_pseudogene	3-oxoacid CoA-transferase 2 pseudogene 1 [Source:HGNC Symbol;Acc:HGNC:21627]	OXCT2P1	0.720638	-1.30387	3.16757	0.0751139	0.785993	Unchanged
ENSG00000260648	lncRNA	novel transcript, sense intronic to PAK6	AC020658.3	1.21795	-1.76424	3.16209	0.0753667	0.786527	Unchanged
ENSG00000225726	processed_pseudogene	pseudogene similar to part of SWI/SNF related, matrix associated, actin dependent regulator of chromatin, subfamily a, member 1 SMARCA1	AC007000.2	-0.630641	-0.996375	3.10651	0.0779797	0.787018	Unchanged
ENSG00000257680	processed_pseudogene	methionyl aminopeptidase 1 (METAP1) pseudogene	AC016144.1	0.648002	-0.118631	3.09901	0.07834	0.787018	Unchanged
ENSG00000186019	lncRNA	novel transcript, antisense to ZNF225 and ZNF224	AC021092.1	-0.207278	2.66471	3.11575	0.0775389	0.787018	Unchanged
ENSG00000263786	lncRNA	novel transcript, sense intronic to HN1	AC022211.1	0.19083	3.51873	3.08434	0.0790492	0.787018	Unchanged
ENSG00000286373	lncRNA	novel transcript	AC022387.2	0.483844	0.112025	3.13793	0.0764911	0.787018	Unchanged
ENSG00000253683	processed_pseudogene	coiled-coil domain containing 72 (CCDC72) pseudogene	AC027309.2	0.853271	-1.31432	3.15297	0.075789	0.787018	Unchanged
ENSG00000270681	lncRNA	novel transcript, antisense to SH3D19	AC095055.1	0.507309	-0.218847	3.08673	0.0789334	0.787018	Unchanged
ENSG00000273156	lncRNA	novel transcript	AC124016.1	0.319835	1.58267	3.14468	0.0761749	0.787018	Unchanged
ENSG00000243289	unprocessed_pseudogene	ArfGAP with GTPase domain, ankyrin repeat and PH domain 13, pseudogene [Source:HGNC Symbol;Acc:HGNC:23499]	AGAP13P	-0.816409	-1.07381	3.10526	0.07804	0.787018	Unchanged
ENSG00000229770	lncRNA	novel transcript	AL022337.1	0.413085	0.489124	3.13711	0.0765291	0.787018	Unchanged
ENSG00000234241	processed_pseudogene	NS1-associated protein 1 (NSAP1) pseudogene	AL109618.1	-0.577438	-0.108891	3.14997	0.0759284	0.787018	Unchanged
ENSG00000278816	lncRNA	novel transcript	AL121890.5	1.04122	-1.38906	3.13117	0.0768087	0.787018	Unchanged
ENSG00000280077	TEC	TEC	AL353763.2	-0.254653	1.78316	3.08894	0.0788262	0.787018	Unchanged
ENSG00000232872	processed_pseudogene	CTAGE family member 3, pseudogene [Source:HGNC Symbol;Acc:HGNC:24348]	CTAGE3P	0.463897	-0.0309188	3.11599	0.0775273	0.787018	Unchanged
ENSG00000220323	transcribed_unprocessed_pseudogene	H2B clustered histone 19, pseudogene [Source:HGNC Symbol;Acc:HGNC:20517]	H2BC19P	0.164073	3.18915	3.08581	0.0789779	0.787018	Unchanged
ENSG00000205940	transcribed_processed_pseudogene	heat shock protein 90 alpha family class B member 2, pseudogene [Source:HGNC Symbol;Acc:HGNC:32537]	HSP90AB2P	0.495627	-0.123879	3.09479	0.0785433	0.787018	Unchanged
ENSG00000224008	lncRNA	long intergenic non-protein coding RNA 1441 [Source:HGNC Symbol;Acc:HGNC:50763]	LINC01441	-0.796526	-1.54024	3.14451	0.0761829	0.787018	Unchanged
ENSG00000172965	lncRNA	MIR4435-2 host gene [Source:HGNC Symbol;Acc:HGNC:35163]	MIR4435-2HG	-0.530117	-0.405968	3.10791	0.077913	0.787018	Unchanged
ENSG00000273372	lncRNA	SFTPD antisense RNA 1 [Source:HGNC Symbol;Acc:HGNC:51589]	SFTPD-AS1	-0.945822	-1.38916	3.15162	0.0758516	0.787018	Unchanged
ENSG00000224892	transcribed_processed_pseudogene	ribosomal protein S4X pseudogene 16 [Source:HGNC Symbol;Acc:HGNC:36365]	RPS4XP16	-0.489247	0.166281	3.08167	0.0791791	0.787105	Unchanged
ENSG00000224032	lncRNA	EPB41L4A antisense RNA 1 [Source:HGNC Symbol;Acc:HGNC:30749]	EPB41L4A-AS1	0.0952716	4.91284	3.07642	0.0794352	0.788666	Unchanged
ENSG00000231304	lncRNA	SGO1 antisense RNA 1 [Source:HGNC Symbol;Acc:HGNC:41081]	SGO1-AS1	-0.899414	-1.77894	3.06412	0.0800387	0.791232	Unchanged
ENSG00000248334	transcribed_unprocessed_pseudogene	WAS protein homolog associated with actin, golgi membranes and microtubules pseudogene 2 [Source:HGNC Symbol;Acc:HGNC:32360]	WHAMMP2	-0.350171	1.34306	3.06552	0.0799695	0.791232	Unchanged
ENSG00000224415	processed_pseudogene	ribosomal protein L19 (RPL19) pseudogene	AC007683.1	0.419681	0.361891	3.05682	0.0803987	0.79157	Unchanged
ENSG00000272033	lncRNA	novel transcript, sense intronic to POU2F1	AL136984.1	-0.422959	0.290568	3.05515	0.0804815	0.79157	Unchanged
ENSG00000215769	lncRNA	ARHGAP27P1-BPTFP1-KPNA2P3 readthrough, transcribed pseudogene [Source:HGNC Symbol;Acc:HGNC:52873]	ARHGAP27P1-BPTFP1-KPNA2P3	0.297587	1.35154	3.05077	0.080699	0.793291	Unchanged
ENSG00000248278	transcribed_processed_pseudogene	SUMO2 pseudogene 17 [Source:HGNC Symbol;Acc:HGNC:49358]	SUMO2P17	1.02964	-1.82265	3.04828	0.0808227	0.793324	Unchanged
ENSG00000237605	lncRNA	DYRK3 antisense RNA 1 [Source:HGNC Symbol;Acc:HGNC:40199]	DYRK3-AS1	-0.948548	-1.44532	3.04469	0.0810017	0.793377	Unchanged
ENSG00000269821	lncRNA	KCNQ1 opposite strand/antisense transcript 1 [Source:HGNC Symbol;Acc:HGNC:6295]	KCNQ1OT1	0.14877	6.8052	3.04243	0.0811143	0.793377	Unchanged
ENSG00000232812	lncRNA	long intergenic non-protein coding RNA 1717 [Source:HGNC Symbol;Acc:HGNC:52504]	LINC01717	0.219312	2.57742	3.039	0.081286	0.793475	Unchanged
ENSG00000224699	lncRNA	LAMTOR5 antisense RNA 1 [Source:HGNC Symbol;Acc:HGNC:40823]	LAMTOR5-AS1	0.176892	3.00051	3.03272	0.0816013	0.794358	Unchanged
ENSG00000287836	lncRNA	novel transcript	AC016168.4	0.334187	0.824843	3.02858	0.0818098	0.795003	Unchanged
ENSG00000245598	lncRNA	DACT3 antisense RNA 1 [Source:HGNC Symbol;Acc:HGNC:44120]	DACT3-AS1	-0.653259	-0.708287	3.02763	0.0818575	0.79507	Unchanged
ENSG00000253300	lncRNA	novel transcript	AC018541.1	-1.04653	-1.60215	3.02048	0.0822191	0.795491	Unchanged
ENSG00000270104	lncRNA	novel transcript	AL670729.2	1.0538	-1.56445	3.01932	0.0822779	0.795491	Unchanged
ENSG00000272688	lncRNA	novel transcript	AP005329.3	0.555767	-0.474612	3.01976	0.0822556	0.795491	Unchanged
ENSG00000179818	lncRNA	PCBP1 antisense RNA 1 [Source:HGNC Symbol;Acc:HGNC:42948]	PCBP1-AS1	0.118568	4.70157	3.02205	0.0821396	0.795491	Unchanged
ENSG00000249661	processed_pseudogene	trinucleotide repeat containing 18 pseudogene 1 [Source:HGNC Symbol;Acc:HGNC:43881]	TNRC18P1	-0.612707	-0.492158	3.02265	0.0821091	0.795491	Unchanged
ENSG00000224975	lncRNA	inactivation escape 1 [Source:HGNC Symbol;Acc:HGNC:6060]	INE1	-0.277923	1.41691	3.01311	0.0825938	0.796191	Unchanged
ENSG00000251819	snRNA	RNA, U6 small nuclear 322, pseudogene [Source:HGNC Symbol;Acc:HGNC:47285]	RNU6-322P	-0.585978	-0.389265	3.01246	0.0826267	0.796191	Unchanged
ENSG00000266648	processed_pseudogene	SET pseudogene 3 [Source:HGNC Symbol;Acc:HGNC:31115]	SETP3	1.01811	-1.57718	3.01374	0.0825617	0.796191	Unchanged
ENSG00000286147	lncRNA	novel transcript, antisense to DKK2	AC092445.1	-0.460984	0.0810993	3.01116	0.0826931	0.796437	Unchanged
ENSG00000093100	lncRNA	novel transcript	AC016026.1	-0.485842	0.0246223	2.99573	0.0834845	0.797754	Unchanged
ENSG00000271778	lncRNA	novel transcript, sense intronic to MFSD1	AC080013.2	-0.783747	-0.890869	3.00111	0.0832074	0.797754	Unchanged
ENSG00000276564	lncRNA	novel transcript	AC130650.2	0.43987	-0.124605	2.99078	0.0837396	0.797754	Unchanged
ENSG00000279283	TEC	novel transcript	AC131009.4	0.443878	0.667173	2.98944	0.083809	0.797754	Unchanged
ENSG00000237950	lncRNA	novel transcript	AL357079.1	0.24403	2.06437	2.99164	0.0836955	0.797754	Unchanged
ENSG00000283480	lncRNA	novel transcript, antisense to SOX4	AL512380.2	-0.680234	-0.845318	2.99236	0.0836582	0.797754	Unchanged
ENSG00000242599	transcribed_unprocessed_pseudogene	CSAG family member 4 (pseudogene) [Source:HGNC Symbol;Acc:HGNC:20923]	CSAG4	-0.489786	-0.0961528	2.99958	0.0832861	0.797754	Unchanged
ENSG00000214826	unprocessed_pseudogene	DEAD/H-box helicase 12, pseudogene [Source:HGNC Symbol;Acc:HGNC:2737]	DDX12P	0.171333	3.76219	2.98724	0.083923	0.797754	Unchanged
ENSG00000259699	processed_pseudogene	high mobility group box 1 pseudogene 8 [Source:HGNC Symbol;Acc:HGNC:13319]	HMGB1P8	0.61832	-0.308757	3.00505	0.0830053	0.797754	Unchanged
ENSG00000215386	lncRNA	mir-99a-let-7c cluster host gene [Source:HGNC Symbol;Acc:HGNC:1274]	MIR99AHG	-0.102902	4.61503	2.99345	0.0836018	0.797754	Unchanged
ENSG00000264672	lncRNA	SEPTIN4 antisense RNA 1 [Source:HGNC Symbol;Acc:HGNC:51345]	SEPTIN4-AS1	0.729804	-0.883597	3.00321	0.0830997	0.797754	Unchanged
ENSG00000271327	lncRNA	novel transcript	AC010201.2	0.200085	2.38413	2.9753	0.0845442	0.799511	Unchanged
ENSG00000276702	lncRNA	novel transcript, antisense to RYR3	AC010809.3	-0.979503	-1.70827	2.97323	0.0846526	0.799511	Unchanged
ENSG00000250616	lncRNA	novel transcript, antisense to YPEL3	AC012645.1	0.466708	0.0368441	2.96549	0.0850589	0.799511	Unchanged
ENSG00000259319	lncRNA	novel transcript, antisense to JDP2	AF111167.2	-0.605515	-0.173814	2.96755	0.0849503	0.799511	Unchanged
ENSG00000269189	lncRNA	novel transcript, sense intronic to FARP1	AL445223.1	0.944881	-1.59004	2.96668	0.0849962	0.799511	Unchanged
ENSG00000234329	processed_pseudogene	ribosomal protein L7a (RPL7A) pseudogene	AL604028.2	0.423269	0.368193	2.96662	0.0849992	0.799511	Unchanged
ENSG00000253263	lncRNA	novel transcript	AP003354.1	0.73727	-0.898932	2.97598	0.0845088	0.799511	Unchanged
ENSG00000175061	lncRNA	small nucleolar RNA host gene 29 [Source:HGNC Symbol;Acc:HGNC:28619]	SNHG29	0.0641682	8.35814	2.97053	0.0847941	0.799511	Unchanged
ENSG00000268565	lncRNA	novel transcript, antisense to TNFAIP8L1	AC005339.1	-1.04075	-1.69458	2.95738	0.0854865	0.801626	Unchanged
ENSG00000257354	lncRNA	novel transcript	AC048341.1	0.160847	3.19695	2.9496	0.0858986	0.801844	Unchanged
ENSG00000235501	lncRNA	CNN3 divergent transcript [Source:HGNC Symbol;Acc:HGNC:54176]	CNN3-DT	0.159835	3.11523	2.94921	0.0859196	0.801844	Unchanged
ENSG00000241886	lncRNA	novel transcript, sense intronic to GK	AC112496.1	-0.980251	-1.75033	2.9398	0.0864213	0.803722	Unchanged
ENSG00000260339	lncRNA	HEXA antisense RNA 1 [Source:HGNC Symbol;Acc:HGNC:25810]	HEXA-AS1	0.489481	-0.319921	2.93946	0.0864398	0.803722	Unchanged
ENSG00000259744	lncRNA	novel transcript, sense intronic to LARP6	AC009269.4	-0.94892	-1.73605	2.93435	0.0867133	0.804077	Unchanged
ENSG00000228436	lncRNA	novel transcript	AL139260.1	0.470825	-0.0694143	2.93031	0.0869306	0.80431	Unchanged
ENSG00000286828	lncRNA	novel transcript	AC008883.3	0.888055	-1.38926	2.92601	0.0871627	0.804398	Unchanged
ENSG00000256040	lncRNA	PAPPA antisense RNA 1 [Source:HGNC Symbol;Acc:HGNC:35152]	PAPPA-AS1	-0.423122	0.735207	2.92055	0.0874578	0.804881	Unchanged
ENSG00000230364	processed_pseudogene	ribosomal protein L4 pseudogene 3 [Source:HGNC Symbol;Acc:HGNC:35773]	RPL4P3	-0.580567	-0.445226	2.91836	0.0875769	0.804881	Unchanged
ENSG00000269959	lncRNA	SPACA6P antisense RNA [Source:HGNC Symbol;Acc:HGNC:49383]	SPACA6P-AS	0.466527	-0.0522724	2.9196	0.0875095	0.804881	Unchanged
ENSG00000197182	lncRNA	MIRLET7B host gene [Source:HGNC Symbol;Acc:HGNC:37189]	MIRLET7BHG	-0.176223	3.55771	2.9147	0.0877756	0.805255	Unchanged
ENSG00000231245	processed_pseudogene	C1D nuclear receptor corepressor pseudogene 1 [Source:HGNC Symbol;Acc:HGNC:31465]	C1DP1	0.357029	1.0983	2.90852	0.088113	0.80676	Unchanged
ENSG00000233967	lncRNA	novel transcript	AL359715.1	-0.17572	3.29533	2.90104	0.0885223	0.808229	Unchanged
ENSG00000227811	lncRNA	INKA2 antisense RNA 1 [Source:HGNC Symbol;Acc:HGNC:49446]	INKA2-AS1	0.23763	1.94775	2.90029	0.0885634	0.808229	Unchanged
ENSG00000198406	processed_pseudogene	basic leucine zipper and W2 domains 1 pseudogene 2 [Source:HGNC Symbol;Acc:HGNC:33954]	BZW1P2	-0.567419	-0.160159	2.89953	0.0886055	0.808234	Unchanged
ENSG00000204778	unprocessed_pseudogene	COBW domain containing 4, pseudogene [Source:HGNC Symbol;Acc:HGNC:18520]	CBWD4P	0.860358	-1.0563	2.89269	0.0889825	0.809522	Unchanged
ENSG00000242539	lncRNA	novel transcript	AC007620.2	-0.484147	0.169818	2.88722	0.0892849	0.809866	Unchanged
ENSG00000265967	lncRNA	novel transcript, antisense to ornithine decarboxylase antizyme 2 OAZ2	AC100830.3	0.412454	0.444952	2.88776	0.089255	0.809866	Unchanged
ENSG00000282851	lncRNA	BST2 interferon stimulated positive regulator [Source:HGNC Symbol;Acc:HGNC:51290]	BISPR	-0.897561	-1.85281	2.88347	0.0894929	0.809866	Unchanged
ENSG00000244026	transcribed_unprocessed_pseudogene	family with sequence similarity 86 member D, pseudogene [Source:HGNC Symbol;Acc:HGNC:32659]	FAM86DP	0.161734	3.32983	2.8852	0.0893969	0.809866	Unchanged
ENSG00000223768	lncRNA	long intergenic non-protein coding RNA 205 [Source:HGNC Symbol;Acc:HGNC:16420]	LINC00205	-0.0664591	6.44567	2.88309	0.0895141	0.809866	Unchanged
ENSG00000272438	lncRNA	novel transcript	AL645608.6	0.246012	2.11596	2.87942	0.0897181	0.810416	Unchanged
ENSG00000246323	lncRNA	novel transcript, antisense to FAM13B	AC113382.1	0.827063	-1.23288	2.87798	0.0897987	0.81074	Unchanged
ENSG00000214719	lncRNA	novel transcript	AC005562.1	-0.281103	1.7668	2.84292	0.0917771	0.813921	Unchanged
ENSG00000254192	lncRNA	novel transcript	AC011365.1	-0.66618	-0.946702	2.85048	0.0913464	0.813921	Unchanged
ENSG00000279207	TEC	novel transcript	AC015813.6	-0.0807025	5.9378	2.85805	0.0909176	0.813921	Unchanged
ENSG00000263126	lncRNA	novel transcript	AC040162.3	0.69418	-0.97994	2.84444	0.0916903	0.813921	Unchanged
ENSG00000243181	processed_pseudogene	ribosomal protein L21 (RPl21) pseudogene	AC087343.1	0.584401	-0.456354	2.85441	0.0911239	0.813921	Unchanged
ENSG00000272787	lncRNA	novel transcript	AC253536.6	0.934563	-1.72227	2.85046	0.0913481	0.813921	Unchanged
ENSG00000262668	lncRNA	olfactory receptor family 1 subfamily F member 1 [Source:NCBI gene (formerly Entrezgene);Acc:4992]	AJ003147.2	-0.816524	-1.66788	2.85651	0.0910047	0.813921	Unchanged
ENSG00000227627	lncRNA	novel transcript	AL080276.2	0.261912	1.8822	2.85835	0.0909004	0.813921	Unchanged
ENSG00000275457	lncRNA	novel transcript, antisense to XRN2	AL117332.1	0.31606	1.08519	2.84705	0.0915416	0.813921	Unchanged
ENSG00000245156	lncRNA	novel transcript	AP001107.1	-0.782518	-1.34562	2.84523	0.0916456	0.813921	Unchanged
ENSG00000272146	lncRNA	ARF4 antisense RNA 1 [Source:HGNC Symbol;Acc:HGNC:51593]	ARF4-AS1	0.587481	-0.830499	2.86044	0.0907829	0.813921	Unchanged
ENSG00000263606	transcribed_processed_pseudogene	CHORDC1 pseudogene 4 [Source:HGNC Symbol;Acc:HGNC:54688]	CHORDC1P4	1.08172	-1.577	2.85007	0.09137	0.813921	Unchanged
ENSG00000238363	snoRNA	small nucleolar RNA, H/ACA box 13 [Source:HGNC Symbol;Acc:HGNC:32601]	SNORA13	1.09187	-1.86807	2.84683	0.0915546	0.813921	Unchanged
ENSG00000238141	lncRNA	BRWD1 antisense RNA 1 [Source:HGNC Symbol;Acc:HGNC:40614]	BRWD1-AS1	0.750284	-1.33518	2.84005	0.0919412	0.814265	Unchanged
ENSG00000273419	lncRNA	novel transcript, antisense to ZNF862	AC004877.1	-0.341857	0.980929	2.83464	0.0922515	0.814537	Unchanged
ENSG00000272758	lncRNA	WDR5B divergent transcript [Source:HGNC Symbol;Acc:HGNC:55192]	WDR5B-DT	0.174358	2.56961	2.83078	0.0924736	0.814537	Unchanged
ENSG00000276449	lncRNA	novel transcript	AC004076.2	0.187044	2.59685	2.82956	0.0925437	0.814688	Unchanged
ENSG00000280138	TEC	novel transcript	AC027290.2	0.306041	3.3845	2.82797	0.0926354	0.814688	Unchanged
ENSG00000274751	lncRNA	novel transcript, antisense to UBE2I	AC120498.9	0.71439	-1.02172	2.82698	0.0926927	0.814688	Unchanged
ENSG00000261559	processed_pseudogene	fascin actin-bundling protein 1 pseudogene 1 [Source:HGNC Symbol;Acc:HGNC:49669]	FSCN1P1	-0.330286	1.2703	2.8254	0.0927835	0.814688	Unchanged
ENSG00000250539	processed_pseudogene	keratin 8 pseudogene 33 [Source:HGNC Symbol;Acc:HGNC:39867]	KRT8P33	0.389562	0.782253	2.82652	0.0927188	0.814688	Unchanged
ENSG00000261329	lncRNA	novel transcript, antisense to a novel protein	AC016597.1	1.08412	-1.89918	2.81238	0.0935395	0.817275	Unchanged
ENSG00000243107	lncRNA	novel transcript	AC000120.1	-0.266287	1.24701	2.78647	0.0950635	0.817939	Unchanged
ENSG00000273674	lncRNA	novel transcript	AC021752.1	0.683324	-0.898813	2.80705	0.0938506	0.817939	Unchanged
ENSG00000272631	lncRNA	novel transcript, antisense to BMPR1A	AC067750.1	0.195254	2.90859	2.78986	0.0948625	0.817939	Unchanged
ENSG00000182376	lncRNA	novel transcript, antisense to FAM38A	AC138028.1	-1.04288	-1.45659	2.80398	0.0940309	0.817939	Unchanged
ENSG00000261752	processed_pseudogene	angiogenic factor with G-patch and FHA domains 1 pseudogene 8 [Source:HGNC Symbol;Acc:HGNC:51745]	AGGF1P8	-0.920891	-1.58944	2.78776	0.094987	0.817939	Unchanged
ENSG00000285637	lncRNA	Novel transcript	AL161449.2	-0.686389	-1.28294	2.79213	0.0947283	0.817939	Unchanged
ENSG00000236021	lncRNA	novel transcript	AL591043.2	0.550843	-0.486166	2.8081	0.0937894	0.817939	Unchanged
ENSG00000235655	processed_pseudogene	H3 histone pseudogene 6 [Source:HGNC Symbol;Acc:HGNC:42980]	H3P6	0.249614	2.02881	2.78831	0.0949541	0.817939	Unchanged
ENSG00000228808	processed_pseudogene	high mobility group box 3 pseudogene 4 [Source:HGNC Symbol;Acc:HGNC:39104]	HMGB3P4	-0.655496	-0.875692	2.80593	0.0939166	0.817939	Unchanged
ENSG00000227456	lncRNA	long intergenic non-protein coding RNA 310 [Source:HGNC Symbol;Acc:HGNC:16414]	LINC00310	-0.780187	-1.10945	2.79898	0.0943245	0.817939	Unchanged
ENSG00000261543	lncRNA	novel transcript, antisense to ISLR	AC010931.2	1.0534	-1.2131	2.77985	0.095457	0.819038	Unchanged
ENSG00000261777	lncRNA	DDX19A divergent transcript [Source:HGNC Symbol;Acc:HGNC:55349]	AC012184.3	0.280826	1.19474	2.77676	0.0956417	0.819132	Unchanged
ENSG00000272645	transcribed_unprocessed_pseudogene	general transcription factor IIi pseudogene 20 [Source:HGNC Symbol;Acc:HGNC:51732]	GTF2IP20	-0.150445	3.77197	2.77575	0.0957018	0.819132	Unchanged
ENSG00000242358	processed_pseudogene	ribosomal protein S21 pseudogene 4 [Source:HGNC Symbol;Acc:HGNC:35922]	RPS21P4	0.605476	-0.729656	2.77756	0.0955937	0.819132	Unchanged
ENSG00000277283	lncRNA	novel transcript, antisense to RAB35	AC004812.2	0.203905	2.57989	2.76607	0.0962821	0.820002	Unchanged
ENSG00000283103	lncRNA	novel transcript, antisense to ERVK3-1	AC010642.2	0.193623	2.87763	2.76359	0.0964317	0.820002	Unchanged
ENSG00000240859	lncRNA	novel transcript	AC093627.4	0.419235	0.724596	2.76345	0.0964402	0.820002	Unchanged
ENSG00000226259	transcribed_unprocessed_pseudogene	general transcription factor IIH subunit 2B (pseudogene) [Source:HGNC Symbol;Acc:HGNC:31393]	GTF2H2B	-0.465485	-0.0255884	2.76267	0.0964873	0.820002	Unchanged
ENSG00000251580	lncRNA	long intergenic non-protein coding RNA 2482 [Source:HGNC Symbol;Acc:HGNC:53458]	LINC02482	-0.343139	0.954544	2.76243	0.0965014	0.820002	Unchanged
ENSG00000288045	lncRNA	novel transcript, antisense to FERMT2	AL352979.4	-0.788335	-1.29287	2.74875	0.0973307	0.822373	Unchanged
ENSG00000266289	lncRNA	novel transcript	AC012213.3	1.08353	-1.5897	2.74627	0.0974814	0.822858	Unchanged
ENSG00000267317	lncRNA	novel transcript, antisense to APC2	AC027307.2	-0.354884	0.888137	2.74552	0.0975275	0.822858	Unchanged
ENSG00000226747	lncRNA	FSIP2 antisense RNA 2 [Source:HGNC Symbol;Acc:HGNC:54061]	FSIP2-AS2	1.09741	-1.9963	2.74625	0.0974827	0.822858	Unchanged
ENSG00000267062	lncRNA	novel transcript, antisense to PRDX2	AC018761.2	-0.6128	-0.257407	2.73399	0.0982334	0.824773	Unchanged
ENSG00000267682	lncRNA	novel transcript, sense intronic to HKR1	AC016590.2	-0.351967	0.977836	2.72315	0.098903	0.825632	Unchanged
ENSG00000284830	lncRNA	novel transcript	AL049557.1	-0.676532	-1.13728	2.72585	0.0987356	0.825632	Unchanged
ENSG00000237506	processed_pseudogene	ribosomal protein SA pseudogene 15 [Source:HGNC Symbol;Acc:HGNC:31464]	RPSAP15	1.0778	-1.60236	2.72335	0.0988906	0.825632	Unchanged
ENSG00000280177	TEC	TEC	AC004408.2	0.656041	-0.876084	2.70891	0.0997892	0.825821	Unchanged
ENSG00000270100	lncRNA	novel transcript	AC012065.3	-0.46917	-0.0478646	2.71792	0.0992271	0.825821	Unchanged
ENSG00000270894	lncRNA	novel transcript, sense overlapping TAF15	AC015849.4	0.569593	-0.522213	2.70861	0.0998082	0.825821	Unchanged
ENSG00000233230	lncRNA	novel transcript	AC079807.1	-0.454649	-0.073806	2.71538	0.0993851	0.825821	Unchanged
ENSG00000226666	processed_pseudogene	heat shock protein family A (Hsp70) member 9 pseudogene 1 [Source:HGNC Symbol;Acc:HGNC:24915]	HSPA9P1	0.860461	-1.25269	2.70802	0.0998451	0.825821	Unchanged
ENSG00000213290	processed_pseudogene	phosphoglycerate kinase 1, pseudogene 2 [Source:HGNC Symbol;Acc:HGNC:8899]	PGK1P2	-0.753102	-1.23236	2.70531	0.100015	0.825821	Unchanged
ENSG00000201944	snoRNA	Small nucleolar RNA SNORA72 [Source:RFAM;Acc:RF00139]	SNORA72	0.657959	-1.12792	2.70635	0.0999497	0.825821	Unchanged
ENSG00000248049	lncRNA	UBA6 antisense RNA 1 (head to head) [Source:HGNC Symbol;Acc:HGNC:49083]	UBA6-AS1	0.10434	4.23665	2.70971	0.0997388	0.825821	Unchanged
ENSG00000267058	lncRNA	novel transcript	AC006213.2	0.373405	1.05753	2.69634	0.100579	0.826172	Unchanged
ENSG00000224167	lncRNA	long intergenic non-protein coding RNA 1357 [Source:HGNC Symbol;Acc:HGNC:50588]	LINC01357	0.41147	0.549304	2.69997	0.10035	0.826172	Unchanged
ENSG00000228305	processed_pseudogene	PRELID1 pseudogene 6 [Source:HGNC Symbol;Acc:HGNC:54771]	PRELID1P6	0.859947	-1.27285	2.69648	0.10057	0.826172	Unchanged
ENSG00000267493	lncRNA	CIRBP antisense RNA 1 [Source:HGNC Symbol;Acc:HGNC:28588]	CIRBP-AS1	-0.551641	-0.411032	2.69373	0.100744	0.82683	Unchanged
ENSG00000207696	miRNA	microRNA 659 [Source:HGNC Symbol;Acc:HGNC:32915]	MIR659	-0.694199	-1.29354	2.69056	0.100945	0.827084	Unchanged
ENSG00000246130	lncRNA	novel transcript	AC107959.2	0.795498	-1.51565	2.68857	0.10107	0.827318	Unchanged
ENSG00000230648	lncRNA	novel transcript	AL138831.1	-0.593322	-0.95518	2.68542	0.101271	0.828048	Unchanged
ENSG00000276101	lncRNA	novel transcript, antisense to SLC38A10	AC027601.3	-0.408612	0.188121	2.6774	0.101782	0.828616	Unchanged
ENSG00000263938	lncRNA	novel transcript, sense intronic to PPM1E	AC100832.2	-0.604208	-0.860339	2.67266	0.102085	0.828616	Unchanged
ENSG00000224479	transcribed_unitary_pseudogene	novel cadherin domain containing pseudogene	AC104162.1	0.70832	-1.03016	2.66459	0.102604	0.828616	Unchanged
ENSG00000257497	lncRNA	novel transcript, antisense to GLIPR1	AC121761.1	0.567416	-0.509783	2.66241	0.102745	0.828616	Unchanged
ENSG00000272077	lncRNA	novel transcript	AC124045.1	0.17472	2.92579	2.65711	0.103088	0.828616	Unchanged
ENSG00000271816	lncRNA	BMS1 pseudogene 4 [Source:NCBI gene (formerly Entrezgene);Acc:729096]	BMS1P4	0.504475	-0.277903	2.67647	0.101841	0.828616	Unchanged
ENSG00000229358	unprocessed_pseudogene	DPY19L1 pseudogene 1 [Source:HGNC Symbol;Acc:HGNC:22395]	DPY19L1P1	-0.254706	1.95583	2.6694	0.102295	0.828616	Unchanged
ENSG00000272455	lncRNA	MRPL20 divergent transcript [Source:HGNC Symbol;Acc:HGNC:54814]	MRPL20-DT	0.194783	2.50864	2.66427	0.102625	0.828616	Unchanged
ENSG00000226801	processed_pseudogene	oligosaccharyltransferase complex subunit pseudogene 8 [Source:HGNC Symbol;Acc:HGNC:42869]	OSTCP8	-0.79557	-1.27269	2.6776	0.101769	0.828616	Unchanged
ENSG00000226856	lncRNA	testis associated oncogenic lncRNA [Source:HGNC Symbol;Acc:HGNC:53788]	THORLNC	-0.72902	-1.03852	2.66275	0.102723	0.828616	Unchanged
ENSG00000257167	lncRNA	TMPO antisense RNA 1 [Source:HGNC Symbol;Acc:HGNC:44158]	TMPO-AS1	0.121908	3.76345	2.65744	0.103067	0.828616	Unchanged
ENSG00000232346	processed_pseudogene	ribosomal protein S17 (RPS17) pseudogene	Z74021.1	-0.753807	-1.137	2.65738	0.10307	0.828616	Unchanged
ENSG00000269235	lncRNA	ZNF350 antisense RNA 1 [Source:HGNC Symbol;Acc:HGNC:48598]	ZNF350-AS1	0.459325	0.162444	2.66969	0.102276	0.828616	Unchanged
ENSG00000267549	lncRNA	ZSCAN5A antisense RNA 1 [Source:HGNC Symbol;Acc:HGNC:55294]	AC006116.7	-0.929925	-1.4569	2.6421	0.104066	0.829199	Unchanged
ENSG00000235408	snoRNA	small nucleolar RNA, H/ACA box 71B [Source:HGNC Symbol;Acc:HGNC:10233]	SNORA71B	0.452514	0.143462	2.6509	0.103491	0.829199	Unchanged
ENSG00000247708	lncRNA	STX18 antisense RNA 1 (head to head) [Source:HGNC Symbol;Acc:HGNC:48877]	STX18-AS1	0.14979	3.92034	2.64726	0.103728	0.829199	Unchanged
ENSG00000224577	lncRNA	long intergenic non-protein coding RNA 1117 [Source:HGNC Symbol;Acc:HGNC:49260]	LINC01117	0.60428	-0.764126	2.63661	0.104426	0.829341	Unchanged
ENSG00000279089	TEC	TEC	AC005839.1	0.172102	3.17761	2.6102	0.106178	0.832438	Unchanged
ENSG00000256427	lncRNA	novel transcript	AC010175.1	-0.508092	-0.28784	2.59673	0.107085	0.832438	Unchanged
ENSG00000234773	transcribed_unprocessed_pseudogene	novel zinc finger protein pseudogene	AC012618.3	0.354778	0.969784	2.60935	0.106236	0.832438	Unchanged
ENSG00000270127	lncRNA	novel transcript	AC027020.2	-0.217937	2.2195	2.60087	0.106805	0.832438	Unchanged
ENSG00000285331	lncRNA	novel transcript	AC090517.5	-0.20008	2.2736	2.61155	0.106088	0.832438	Unchanged
ENSG00000278971	TEC	TEC	AC091305.1	0.362745	0.274009	2.61088	0.106133	0.832438	Unchanged
ENSG00000205959	lncRNA	novel transcript	AC105345.1	0.76096	-1.10094	2.61793	0.105662	0.832438	Unchanged
ENSG00000238035	lncRNA	novel transcript	AC138035.1	-0.398027	0.597455	2.59946	0.1069	0.832438	Unchanged
ENSG00000213080	processed_pseudogene	spermine synthase (SMS) pseudogene	AL354714.2	0.606033	-0.674272	2.61457	0.105886	0.832438	Unchanged
ENSG00000272405	lncRNA	novel transcript, antisense to BCAN	AL365181.3	0.644256	-1.19411	2.59986	0.106873	0.832438	Unchanged
ENSG00000228702	processed_pseudogene	novel pseudogene	AL645998.1	-0.968654	-1.8376	2.59484	0.107212	0.832438	Unchanged
ENSG00000189212	transcribed_unprocessed_pseudogene	DPY19L2 pseudogene 1 [Source:HGNC Symbol;Acc:HGNC:22305]	DPY19L2P1	-0.140725	3.99878	2.61137	0.1061	0.832438	Unchanged
ENSG00000241478	processed_pseudogene	heat shock protein family A (Hsp70) member 8 pseudogene 9 [Source:HGNC Symbol;Acc:HGNC:44924]	HSPA8P9	-1.04213	-1.30341	2.59605	0.10713	0.832438	Unchanged
ENSG00000255433	lncRNA	long intergenic non-protein coding RNA 2735 [Source:HGNC Symbol;Acc:HGNC:54252]	LINC02735	-0.176999	3.63525	2.60567	0.106482	0.832438	Unchanged
ENSG00000235613	processed_pseudogene	nuclear speckle splicing regulatory protein 1 pseudogene 1 [Source:HGNC Symbol;Acc:HGNC:38087]	NSRP1P1	0.861123	-1.48025	2.61819	0.105645	0.832438	Unchanged
ENSG00000260233	lncRNA	ZNRD2 antisense RNA 1 (head to head) [Source:HGNC Symbol;Acc:HGNC:27384]	ZNRD2-AS1	0.299395	1.05481	2.59311	0.10733	0.832438	Unchanged
ENSG00000278291	lncRNA	novel transcript, antisense to IL17D	AL161772.1	0.127839	3.97807	2.58843	0.107647	0.833409	Unchanged
ENSG00000249485	processed_pseudogene	RBBP4 pseudogene 1 [Source:HGNC Symbol;Acc:HGNC:42368]	RBBP4P1	0.625714	-0.742971	2.5883	0.107656	0.833409	Unchanged
ENSG00000271976	lncRNA	novel transcript, antisense to IL17RB	AC012467.2	-0.154397	3.45103	2.56895	0.10898	0.833452	Unchanged
ENSG00000248583	unprocessed_pseudogene	ankyrin repeat domain family (ANKRD) pseudogene	AC119751.3	0.860403	-1.70834	2.56098	0.109531	0.833452	Unchanged
ENSG00000274422	lncRNA	novel transcript	AC245060.5	-0.187319	3.33292	2.55678	0.109822	0.833452	Unchanged
ENSG00000277767	lncRNA	novel transcript	AL442128.2	0.389179	0.183966	2.55549	0.109912	0.833452	Unchanged
ENSG00000269176	lncRNA	novel transcript, antisense to TAF6L	AP001160.3	0.231766	2.04988	2.55704	0.109804	0.833452	Unchanged
ENSG00000223922	processed_pseudogene	argininosuccinate synthetase 1 pseudogene 2 [Source:HGNC Symbol;Acc:HGNC:765]	ASS1P2	-0.435487	0.213971	2.58218	0.108073	0.833452	Unchanged
ENSG00000261716	transcribed_unprocessed_pseudogene	H2B clustered histone 20, pseudogene [Source:HGNC Symbol;Acc:HGNC:20516]	H2BC20P	0.11546	3.97382	2.55162	0.110181	0.833452	Unchanged
ENSG00000248890	lncRNA	HHIP antisense RNA 1 [Source:HGNC Symbol;Acc:HGNC:44182]	HHIP-AS1	0.968796	-1.34564	2.55957	0.109628	0.833452	Unchanged
ENSG00000241213	lncRNA	long intergenic non-protein coding RNA 2024 [Source:HGNC Symbol;Acc:HGNC:52859]	LINC02024	0.437498	0.217019	2.56291	0.109397	0.833452	Unchanged
ENSG00000283196	transcribed_unprocessed_pseudogene	LSP1 pseudogene 5 [Source:NCBI gene (formerly Entrezgene);Acc:645166]	LSP1P5	0.391405	0.308968	2.55155	0.110186	0.833452	Unchanged
ENSG00000236047	processed_pseudogene	ribosomal protein L13a pseudogene 12 [Source:HGNC Symbol;Acc:HGNC:35673]	RPL13AP12	-0.526708	-0.907081	2.55935	0.109644	0.833452	Unchanged
ENSG00000181524	processed_pseudogene	RPL24 pseudogene 4 [Source:HGNC Symbol;Acc:HGNC:21371]	RPL24P4	-0.188876	2.62785	2.5499	0.110301	0.833452	Unchanged
ENSG00000219747	processed_pseudogene	ribosomal protein L32 pseudogene 16 [Source:HGNC Symbol;Acc:HGNC:36086]	RPL32P16	0.794868	-1.14647	2.56766	0.109069	0.833452	Unchanged
ENSG00000207067	snoRNA	small nucleolar RNA, H/ACA box 72 [Source:HGNC Symbol;Acc:HGNC:10234]	SNORA72	0.612207	-0.722639	2.57794	0.108363	0.833452	Unchanged
ENSG00000262904	processed_pseudogene	thymopoietin pseudogene 2 [Source:HGNC Symbol;Acc:HGNC:50860]	TMPOP2	-0.522886	-0.298358	2.57603	0.108493	0.833452	Unchanged
ENSG00000279457	unprocessed_pseudogene	WAS protein family homolog 9, pseudogene [Source:HGNC Symbol;Acc:HGNC:53981]	WASH9P	-0.39193	0.472606	2.57039	0.108881	0.833452	Unchanged
ENSG00000260518	transcribed_unprocessed_pseudogene	BMS1 pseudogene 8 [Source:HGNC Symbol;Acc:HGNC:49152]	BMS1P8	-0.179541	2.56307	2.54604	0.110571	0.83388	Unchanged
ENSG00000268471	lncRNA	MIR4453 host gene [Source:HGNC Symbol;Acc:HGNC:25288]	MIR4453HG	0.131707	3.64658	2.54576	0.110591	0.83388	Unchanged
ENSG00000285744	lncRNA	novel transcript	AC083837.1	-0.130041	4.73465	2.54439	0.110687	0.834282	Unchanged
ENSG00000279026	TEC	TEC	AC005225.4	0.315536	0.995086	2.52754	0.111874	0.836423	Unchanged
ENSG00000278740	lncRNA	novel transcript	AC005332.7	0.983598	-1.41113	2.52994	0.111704	0.836423	Unchanged
ENSG00000261693	lncRNA	novel transcript, antisense to TSNARE1	AC134682.1	0.797587	-1.44533	2.52877	0.111787	0.836423	Unchanged
ENSG00000236576	processed_pseudogene	zinc finger protein pseudogene	AC241520.1	-0.63796	-0.728516	2.52357	0.112157	0.836423	Unchanged
ENSG00000237188	lncRNA	novel transcript, antisense to FMO5	AC242426.2	0.557992	-0.722627	2.52133	0.112316	0.836423	Unchanged
ENSG00000258727	lncRNA	novel transcript, antisense to AP1G2	AL135999.1	-0.237104	1.4027	2.52529	0.112034	0.836423	Unchanged
ENSG00000246889	lncRNA	novel transcript	AP000487.1	-0.221954	2.2369	2.51642	0.112666	0.836423	Unchanged
ENSG00000286156	transcribed_unprocessed_pseudogene	BMS1 pseudogene 23 [Source:HGNC Symbol;Acc:HGNC:55088]	BMS1P23	-0.290997	1.21017	2.52501	0.112054	0.836423	Unchanged
ENSG00000255568	lncRNA	BRWD1 antisense RNA 2 [Source:HGNC Symbol;Acc:HGNC:16423]	BRWD1-AS2	-0.594809	-0.792742	2.5226	0.112226	0.836423	Unchanged
ENSG00000236753	lncRNA	MKLN1 antisense RNA [Source:HGNC Symbol;Acc:HGNC:40374]	MKLN1-AS	-0.16216	2.7854	2.51685	0.112635	0.836423	Unchanged
ENSG00000261251	lncRNA	EFCAB6 divergent transcript [Source:HGNC Symbol;Acc:HGNC:55371]	Z97055.2	0.547458	-0.27276	2.51611	0.112688	0.836423	Unchanged
ENSG00000267568	lncRNA	novel transcript	AC016168.2	-0.520049	-0.590056	2.51179	0.112998	0.83683	Unchanged
ENSG00000278952	TEC	TEC	AP003068.4	0.595168	-1.0221	2.51453	0.112801	0.83683	Unchanged
ENSG00000272525	lncRNA	BTF3 divergent transcript [Source:HGNC Symbol;Acc:HGNC:55211]	BTF3-DT	0.457494	-0.101156	2.51267	0.112934	0.83683	Unchanged
ENSG00000262333	processed_pseudogene	heterogeneous nuclear ribonucleoprotein A1 pseudogene 16 [Source:HGNC Symbol;Acc:HGNC:39134]	HNRNPA1P16	0.25644	1.70128	2.51175	0.113	0.83683	Unchanged
ENSG00000272568	lncRNA	novel transcript, antisense to CPVL	AC005162.2	0.577369	-0.647769	2.49729	0.114043	0.837365	Unchanged
ENSG00000253336	processed_pseudogene	hydroxysteroid (17-beta) dehydrogenase 4 (HSD17B4) pseudogene	AC018992.1	1.19705	-1.82252	2.49702	0.114062	0.837365	Unchanged
ENSG00000244398	processed_pseudogene	ribosomal protein L36a (RPL36A) pseudogene	AC116533.1	0.291646	1.29727	2.50539	0.113458	0.837365	Unchanged
ENSG00000268105	processed_pseudogene	ribosomal protein L5 (RPL5) pseudogene	AC124856.1	0.366977	0.481048	2.49644	0.114104	0.837365	Unchanged
ENSG00000236480	processed_pseudogene	pyruvate kinase M1/2 pseudogene 1 [Source:HGNC Symbol;Acc:HGNC:44243]	PKMP1	0.857827	-1.30391	2.50004	0.113843	0.837365	Unchanged
ENSG00000233913	processed_pseudogene	ribosomal protein L10 pseudogene 9 [Source:HGNC Symbol;Acc:HGNC:35579]	RPL10P9	0.500597	-0.223674	2.50766	0.113294	0.837365	Unchanged
ENSG00000274259	lncRNA	SYNGAP1 antisense RNA 1 [Source:HGNC Symbol;Acc:HGNC:53831]	SYNGAP1-AS1	0.703218	-1.21351	2.50186	0.113712	0.837365	Unchanged
ENSG00000228328	processed_pseudogene	phosphoglycerate kinase 1 pseudogene 1 [Source:HGNC Symbol;Acc:HGNC:8897]	PGK1P1	1.19715	-1.86793	2.49543	0.114177	0.837584	Unchanged
ENSG00000276390	lncRNA	novel transcript, sense intronic to RPAP3	AC004241.3	0.520879	-0.308795	2.4883	0.114695	0.839441	Unchanged
ENSG00000272345	lncRNA	novel transcript, antisense to ACOT13	AL031775.1	0.52645	-0.212754	2.48082	0.115242	0.840862	Unchanged
ENSG00000226913	lncRNA	BSN divergent transcript [Source:HGNC Symbol;Acc:HGNC:42445]	BSN-DT	0.543328	-0.324856	2.48167	0.11518	0.840862	Unchanged
ENSG00000261613	lncRNA	novel transcript, antisense to PDPK1	AC093525.6	-0.696881	-1.26279	2.47444	0.115711	0.841006	Unchanged
ENSG00000279570	TEC	TEC	AC099804.1	0.880237	-1.5522	2.47947	0.115341	0.841006	Unchanged
ENSG00000280211	TEC	novel transcript, antisense to RNF40	AC106886.4	0.482372	-0.198882	2.47131	0.115941	0.841006	Unchanged
ENSG00000265828	miRNA	microRNA 3939 [Source:HGNC Symbol;Acc:HGNC:38931]	MIR3939	-0.862189	-1.38936	2.47179	0.115906	0.841006	Unchanged
ENSG00000242086	lncRNA	MUC20 overlapping transcript [Source:HGNC Symbol;Acc:HGNC:53807]	MUC20-OT1	0.114306	4.93982	2.4747	0.115692	0.841006	Unchanged
ENSG00000263266	processed_pseudogene	ribosomal protein S7 pseudogene 1 [Source:HGNC Symbol;Acc:HGNC:17081]	RPS7P1	0.155555	2.92787	2.47368	0.115767	0.841006	Unchanged
ENSG00000215875	processed_pseudogene	ST13, Hsp70 interacting protein pseudogene 20 [Source:HGNC Symbol;Acc:HGNC:38863]	ST13P20	-0.7197	-1.09165	2.47076	0.115981	0.841006	Unchanged
ENSG00000261505	lncRNA	novel transcript, antisense to UBE2I	AL031714.1	-0.677155	-1.0738	2.46678	0.116276	0.842515	Unchanged
ENSG00000276846	lncRNA	novel transcript, antisense to HKR1	AC016590.3	0.38927	0.305255	2.45784	0.116939	0.843154	Unchanged
ENSG00000270061	lncRNA	novel transcript, sense intronic to CCDC92	AC068790.5	-0.380469	0.588672	2.45697	0.117004	0.843154	Unchanged
ENSG00000226084	processed_pseudogene	ribosomal protein L17 (RPL17) pseudogene	AC113935.1	-0.739656	-1.0917	2.46242	0.116599	0.843154	Unchanged
ENSG00000286614	transcribed_unprocessed_pseudogene	novel pseudogene	AL589182.3	0.664606	-0.829897	2.45342	0.117269	0.843154	Unchanged
ENSG00000255097	lncRNA	novel transcript	AP006259.1	-0.916363	-1.66756	2.45956	0.116811	0.843154	Unchanged
ENSG00000179277	processed_pseudogene	Meis homeobox 3 pseudogene 1 [Source:HGNC Symbol;Acc:HGNC:7002]	MEIS3P1	0.25345	1.52265	2.45914	0.116843	0.843154	Unchanged
ENSG00000276136	lncRNA	novel transcript	AC016957.2	-0.826504	-1.68116	2.44338	0.118022	0.844422	Unchanged
ENSG00000261823	lncRNA	novel transcript	AC084782.2	0.391711	0.260209	2.44442	0.117944	0.844422	Unchanged
ENSG00000273149	lncRNA	novel transcript, antisense to TPT1	AL138963.3	-0.356213	2.3044	2.44375	0.117994	0.844422	Unchanged
ENSG00000181201	unitary_pseudogene	H2B.U histone 2, pseudogene [Source:HGNC Symbol;Acc:HGNC:20515]	H2BU2P	0.786397	-1.22282	2.44062	0.11823	0.844422	Unchanged
ENSG00000230658	lncRNA	KLHL7 divergent transcript [Source:HGNC Symbol;Acc:HGNC:43431]	KLHL7-DT	0.243178	1.62146	2.44337	0.118022	0.844422	Unchanged
ENSG00000272370	lncRNA	novel transcript	AC092354.2	0.857716	-1.33521	2.43995	0.11828	0.844475	Unchanged
ENSG00000231249	lncRNA	ITPR1 divergent transcript [Source:HGNC Symbol;Acc:HGNC:44470]	ITPR1-DT	0.384199	0.0799191	2.43764	0.118454	0.844805	Unchanged
ENSG00000233061	lncRNA	TTLL7 intronic transcript 1 [Source:HGNC Symbol;Acc:HGNC:41486]	TTLL7-IT1	-0.783991	-1.50363	2.43875	0.118371	0.844805	Unchanged
ENSG00000275038	lncRNA	novel transcript, antisense to TLX3	AC091980.2	-0.204124	2.4753	2.43415	0.118718	0.845481	Unchanged
ENSG00000260089	processed_pseudogene	ADAM metallopeptidase domain 3B (pseudogene) [Source:HGNC Symbol;Acc:HGNC:210]	ADAM3B	0.894729	-1.18396	2.43292	0.118812	0.845481	Unchanged
ENSG00000287769	lncRNA	novel transcript, antisense to SPIN1	AL353748.3	0.208633	1.91808	2.43415	0.118718	0.845481	Unchanged
ENSG00000167747	transcribed_unitary_pseudogene	chromosome 19 open reading frame 48 [Source:HGNC Symbol;Acc:HGNC:29667]	C19orf48	0.0832795	5.51294	2.43346	0.118771	0.845481	Unchanged
ENSG00000279948	TEC	TEC	AC008895.1	0.632274	0.199727	2.42635	0.11931	0.845918	Unchanged
ENSG00000246283	lncRNA	novel transcript	AC090510.1	-0.472821	-0.272784	2.42334	0.11954	0.845918	Unchanged
ENSG00000255199	unprocessed_pseudogene	general transcription factor IIi pseudogene 11 [Source:HGNC Symbol;Acc:HGNC:51724]	GTF2IP11	-0.784237	-1.24248	2.42704	0.119258	0.845918	Unchanged
ENSG00000196741	lncRNA	long intergenic non-protein coding RNA 1560 [Source:HGNC Symbol;Acc:HGNC:27333]	LINC01560	0.197199	2.29378	2.43062	0.118986	0.845918	Unchanged
ENSG00000277049	rRNA	RNA, 5S ribosomal pseudogene 530 [Source:HGNC Symbol;Acc:HGNC:53799]	RNA5SP530	0.739295	-1.263	2.42553	0.119373	0.845918	Unchanged
ENSG00000240489	processed_pseudogene	SET pseudogene 14 [Source:HGNC Symbol;Acc:HGNC:42933]	SETP14	0.242791	1.60389	2.41938	0.119842	0.846314	Unchanged
ENSG00000219023	processed_pseudogene	ribosomal protein S15A (RPS15A) pseudogene	AL033519.3	-0.30423	1.11089	2.41508	0.120172	0.846347	Unchanged
ENSG00000224856	processed_pseudogene	ribosomal protein L35a pseudogene 36 [Source:HGNC Symbol;Acc:HGNC:36103]	RPL35AP36	0.979089	-1.89894	2.41604	0.120098	0.846347	Unchanged
ENSG00000273888	lncRNA	FRMD6 antisense RNA 1 [Source:HGNC Symbol;Acc:HGNC:20129]	FRMD6-AS1	0.320377	0.56774	2.4108	0.120501	0.846679	Unchanged
ENSG00000286456	lncRNA	novel transcript	AC016769.5	0.215334	2.14337	2.39759	0.121522	0.847318	Unchanged
ENSG00000267002	lncRNA	novel transcript	AC060780.1	-0.0927775	5.18497	2.40655	0.120828	0.847318	Unchanged
ENSG00000259635	lncRNA	novel transcript, antisense OAZ2	AC100830.1	0.486272	-0.641989	2.38035	0.12287	0.847318	Unchanged
ENSG00000275494	lncRNA	novel transcript	AC133552.5	0.624366	-1.16557	2.38389	0.122592	0.847318	Unchanged
ENSG00000260796	lncRNA	novel transcript, antisense to ATXN2L	AC145285.3	0.683743	-0.757243	2.40527	0.120927	0.847318	Unchanged
ENSG00000285646	lncRNA	novel transcript	AL021155.4	-0.868385	-1.55206	2.38201	0.12274	0.847318	Unchanged
ENSG00000287843	lncRNA	novel transcript	AL161628.1	0.928614	-1.53999	2.38563	0.122456	0.847318	Unchanged
ENSG00000270605	lncRNA	novel transcript	AL353622.1	0.217329	1.95061	2.40183	0.121194	0.847318	Unchanged
ENSG00000238287	lncRNA	novel transcript	AL603839.3	-0.299779	0.69647	2.38599	0.122427	0.847318	Unchanged
ENSG00000179523	lncRNA	EIF3J divergent transcript [Source:HGNC Symbol;Acc:HGNC:48616]	EIF3J-DT	0.124899	3.54021	2.39624	0.121627	0.847318	Unchanged
ENSG00000235946	processed_pseudogene	H2B.W histone 3, pseudogene [Source:HGNC Symbol;Acc:HGNC:44390]	H2BW3P	0.508526	-0.145969	2.39001	0.122113	0.847318	Unchanged
ENSG00000256968	processed_pseudogene	SNRPE pseudogene 2 [Source:HGNC Symbol;Acc:HGNC:20733]	SNRPEP2	0.642633	-0.830084	2.38557	0.12246	0.847318	Unchanged
ENSG00000214391	processed_pseudogene	tubulin alpha pseudogene 2 [Source:HGNC Symbol;Acc:HGNC:14531]	TUBAP2	0.453437	0.298647	2.39673	0.121589	0.847318	Unchanged
ENSG00000213062	lncRNA	novel transcript	Z99572.1	0.18182	2.67858	2.39459	0.121756	0.847318	Unchanged
ENSG00000247982	lncRNA	long intergenic non-protein coding RNA 926 [Source:HGNC Symbol;Acc:HGNC:27514]	LINC00926	-0.227446	1.90611	2.37679	0.123151	0.847652	Unchanged
ENSG00000260742	lncRNA	novel transcript, antisense to SSFA2	AC009962.1	0.703026	-1.14664	2.35222	0.125105	0.848131	Unchanged
ENSG00000271830	lncRNA	novel transcript	AC012213.4	-0.246443	1.22976	2.36343	0.124209	0.848131	Unchanged
ENSG00000279133	TEC	TEC	AC018628.1	0.369265	1.58984	2.37144	0.123573	0.848131	Unchanged
ENSG00000279555	TEC	TEC	AC091181.1	0.346413	2.25471	2.36107	0.124396	0.848131	Unchanged
ENSG00000236317	processed_pseudogene	ribosomal protein S28 (RPS28) pseudogene	AC104333.2	0.867889	-1.57714	2.36598	0.124006	0.848131	Unchanged
ENSG00000260261	transcribed_unprocessed_pseudogene	programmed cell death 6 (PDCD6) pseudogene	AC124944.2	0.230106	1.83825	2.35498	0.124884	0.848131	Unchanged
ENSG00000255434	lncRNA	novel transcript	AP001922.6	0.325036	0.848193	2.36024	0.124463	0.848131	Unchanged
ENSG00000255135	lncRNA	novel transcript	AP002360.1	-0.174942	2.45212	2.36725	0.123905	0.848131	Unchanged
ENSG00000228519	processed_pseudogene	RANBP1 pseudogene 1 [Source:HGNC Symbol;Acc:HGNC:54908]	RANBP1P1	-0.369264	0.517534	2.36039	0.124451	0.848131	Unchanged
ENSG00000224324	processed_pseudogene	THAP domain containing 5 pseudogene 1 [Source:HGNC Symbol;Acc:HGNC:22340]	THAP5P1	0.577606	-1.01362	2.35564	0.124831	0.848131	Unchanged
ENSG00000229852	lncRNA	novel transcript, antisense to KHDC1	AC019205.1	0.117137	4.39511	2.34758	0.125478	0.848791	Unchanged
ENSG00000249772	lncRNA	novel transcript	AC026427.1	0.853456	-1.2628	2.34784	0.125457	0.848791	Unchanged
ENSG00000212694	lncRNA	long intergenic non-protein coding RNA 1089 [Source:HGNC Symbol;Acc:HGNC:27886]	LINC01089	0.138016	3.66817	2.34854	0.125401	0.848791	Unchanged
ENSG00000282390	lncRNA	novel transcript, sense intronic to ADARB2	AL392083.1	0.0903642	5.23005	2.34479	0.125702	0.848938	Unchanged
ENSG00000281344	lncRNA	HELLP associated long non-coding RNA [Source:HGNC Symbol;Acc:HGNC:43984]	HELLPAR	-0.152569	3.70313	2.34158	0.125962	0.84913	Unchanged
ENSG00000227354	lncRNA	RBM26 antisense RNA 1 [Source:HGNC Symbol;Acc:HGNC:39805]	RBM26-AS1	-0.123815	3.67923	2.33912	0.126161	0.849642	Unchanged
ENSG00000264853	lncRNA	novel transcript, sense intronic to GRB2	AC011933.2	0.62413	-0.267341	2.33685	0.126345	0.850174	Unchanged
ENSG00000253716	lncRNA	MYC-induced long non-coding RNA [Source:HGNC Symbol;Acc:HGNC:51653]	MINCR	0.21798	1.82295	2.33552	0.126453	0.850174	Unchanged
ENSG00000279692	TEC	TEC	AC110285.6	0.257973	1.35656	2.3346	0.126527	0.85026	Unchanged
ENSG00000230606	lncRNA	novel transcript	AC092683.1	-0.328134	0.520054	2.32794	0.12707	0.851385	Unchanged
ENSG00000287957	lncRNA	novel transcript, antisense to RIC8B	AC007695.1	0.689632	-1.50414	2.32593	0.127235	0.851597	Unchanged
ENSG00000252414	snRNA	RNA, U6 small nuclear 100, pseudogene [Source:HGNC Symbol;Acc:HGNC:47063]	RNU6-100P	-0.889078	-1.80803	2.32325	0.127454	0.852005	Unchanged
ENSG00000210112	Mt_tRNA	mitochondrially encoded tRNA-Met (AUA/G) [Source:HGNC Symbol;Acc:HGNC:7492]	MT-TM	-0.985313	-1.89888	2.32128	0.127615	0.852109	Unchanged
ENSG00000259153	lncRNA	novel transcript	AC004816.1	0.191096	2.20068	2.31691	0.127974	0.852697	Unchanged
ENSG00000280375	TEC	TEC	AL359740.1	0.869125	-1.80801	2.3146	0.128164	0.852697	Unchanged
ENSG00000213442	processed_pseudogene	ribosomal protein L18a pseudogene 3 [Source:HGNC Symbol;Acc:HGNC:31387]	RPL18AP3	-0.233635	1.87112	2.31518	0.128116	0.852697	Unchanged
ENSG00000242748	transcribed_processed_pseudogene	ribosomal protein L23a pseudogene 81 [Source:HGNC Symbol;Acc:HGNC:36246]	RPL23AP81	-0.551275	-0.93072	2.31205	0.128375	0.853087	Unchanged
ENSG00000261970	processed_pseudogene	solute carrier family 19, member 3 (SLC19A3) pseudogene	AL391840.2	-0.428491	-0.722819	2.31087	0.128473	0.853156	Unchanged
ENSG00000272501	lncRNA	novel transcript, antisense to HCG27	AL662844.4	0.376694	0.287964	2.30685	0.128805	0.853326	Unchanged
ENSG00000268592	lncRNA	RAET1E antisense RNA 1 [Source:NCBI gene (formerly Entrezgene);Acc:100652739]	RAET1E-AS1	-1.11319	-1.66742	2.30891	0.128634	0.853326	Unchanged
ENSG00000254602	lncRNA	novel transcript, sense overlapping CLP1	AP000662.1	-0.396227	-0.335593	2.29765	0.12957	0.854904	Unchanged
ENSG00000231871	lncRNA	IPO9 antisense RNA 1 [Source:HGNC Symbol;Acc:HGNC:40892]	IPO9-AS1	0.372876	0.154401	2.29913	0.129447	0.854904	Unchanged
ENSG00000259993	processed_pseudogene	hyperpolarization activated cyclic nucleotide-gated potassium channel 2 (HCN2) pseudogene	AC135731.1	0.99182	-1.85262	2.29697	0.129626	0.854989	Unchanged
ENSG00000269688	lncRNA	novel transcript, sense intronic to HNRNPL	AC008982.2	-0.259225	1.05503	2.29161	0.130075	0.855003	Unchanged
ENSG00000267651	lncRNA	novel transcript	AC015961.1	-0.253668	1.46193	2.27951	0.131093	0.855003	Unchanged
ENSG00000286675	lncRNA	novel transcript	AC068700.2	-0.28671	1.10022	2.28602	0.130544	0.855003	Unchanged
ENSG00000279204	TEC	TEC	AC134043.3	0.780407	-1.4004	2.28914	0.130282	0.855003	Unchanged
ENSG00000235036	processed_pseudogene	pseudogene similar to DNAJ protein	AL035456.1	0.475973	-0.267936	2.28747	0.130422	0.855003	Unchanged
ENSG00000116652	lncRNA	deleted in lymphocytic leukemia 2 like [Source:HGNC Symbol;Acc:HGNC:13225]	DLEU2L	-0.238035	1.43908	2.28568	0.130573	0.855003	Unchanged
ENSG00000266904	lncRNA	long intergenic non-protein coding RNA 663 [Source:HGNC Symbol;Acc:HGNC:28609]	LINC00663	-0.219295	1.93449	2.28791	0.130385	0.855003	Unchanged
ENSG00000226243	processed_pseudogene	ribosomal protein L37a pseudogene 1 [Source:HGNC Symbol;Acc:HGNC:16548]	RPL37AP1	-0.722313	-1.28305	2.28963	0.130241	0.855003	Unchanged
ENSG00000233416	processed_pseudogene	ribosomal protein S25 pseudogene 3 [Source:HGNC Symbol;Acc:HGNC:36073]	RPS25P3	0.79648	-1.3349	2.2858	0.130563	0.855003	Unchanged
ENSG00000205181	lncRNA	long intergenic non-protein coding RNA 654 [Source:HGNC Symbol;Acc:HGNC:27154]	LINC00654	-0.236664	1.41015	2.27778	0.131239	0.855493	Unchanged
ENSG00000237410	lncRNA	NRXN2 antisense RNA 1 [Source:HGNC Symbol;Acc:HGNC:40416]	NRXN2-AS1	0.998431	-1.80787	2.27668	0.131333	0.855815	Unchanged
ENSG00000244218	misc_RNA	RNA, 7SL, cytoplasmic 81, pseudogene [Source:HGNC Symbol;Acc:HGNC:46097]	RN7SL81P	0.350049	0.752059	2.27548	0.131435	0.855907	Unchanged
ENSG00000277977	unprocessed_pseudogene	novel zinc finger pseudogene	AC010332.1	0.56442	-0.660848	2.27458	0.131511	0.85601	Unchanged
ENSG00000233747	processed_pseudogene	ribosomal protein L36a pseudogene 13 [Source:HGNC Symbol;Acc:HGNC:35877]	RPL36AP13	0.964483	-1.82274	2.27172	0.131754	0.856187	Unchanged
ENSG00000279161	TEC	TEC	AC093503.2	0.164334	3.51329	2.26772	0.132094	0.856297	Unchanged
ENSG00000226332	lncRNA	novel transcript	AL354836.1	-0.564498	-0.800672	2.26319	0.132481	0.856297	Unchanged
ENSG00000276916	lncRNA	novel transcript, sense intronic	AL442125.2	-0.394778	0.150866	2.26338	0.132464	0.856297	Unchanged
ENSG00000283982	lncRNA	novel transcript	AL445623.2	0.8596	-1.77868	2.26693	0.132162	0.856297	Unchanged
ENSG00000287109	lncRNA	novel transcript, antisense to JAM2	AP000224.1	0.584111	-0.58984	2.26766	0.132099	0.856297	Unchanged
ENSG00000179101	processed_pseudogene	H3 histone pseudogene 47 [Source:HGNC Symbol;Acc:HGNC:54475]	H3P47	0.993507	-1.86781	2.26916	0.131971	0.856297	Unchanged
ENSG00000239830	processed_pseudogene	ribosomal protein S4X pseudogene 22 [Source:HGNC Symbol;Acc:HGNC:36125]	RPS4XP22	-0.529133	-0.715355	2.26245	0.132544	0.856297	Unchanged
ENSG00000256720	processed_pseudogene	BTG anti-proliferation factor 1 pseudogene 1 [Source:HGNC Symbol;Acc:HGNC:37692]	BTG1P1	-0.745903	-1.55241	2.25094	0.133534	0.859747	Unchanged
ENSG00000213830	processed_pseudogene	cofilin 1 pseudogene 5 [Source:HGNC Symbol;Acc:HGNC:1877]	CFL1P5	-0.52907	-0.771448	2.2482	0.13377	0.859903	Unchanged
ENSG00000164845	transcribed_unprocessed_pseudogene	family with sequence similarity 86 member F, pseudogene [Source:HGNC Symbol;Acc:HGNC:42357]	FAM86FP	0.509415	-0.546046	2.24695	0.133878	0.860034	Unchanged
ENSG00000224430	processed_pseudogene	makorin ring finger protein 5, pseudogene [Source:HGNC Symbol;Acc:HGNC:7117]	MKRN5P	0.785492	-1.70846	2.24741	0.133838	0.860034	Unchanged
ENSG00000187762	processed_pseudogene	heat shock protein family E (Hsp10) member 1 pseudogene 11 [Source:HGNC Symbol;Acc:HGNC:49330]	HSPE1P11	0.997993	-1.93087	2.24595	0.133965	0.860073	Unchanged
ENSG00000269386	lncRNA	RAB11B antisense RNA 1 [Source:HGNC Symbol;Acc:HGNC:44178]	RAB11B-AS1	0.273881	1.26886	2.24344	0.134182	0.860073	Unchanged
ENSG00000214612	processed_pseudogene	ribosomal protein S19 pseudogene 1 [Source:HGNC Symbol;Acc:HGNC:16534]	RPS19P1	0.604227	-0.837628	2.24347	0.13418	0.860073	Unchanged
ENSG00000233225	processed_pseudogene	SSBP3 pseudogene 1 [Source:HGNC Symbol;Acc:HGNC:54577]	SSBL3P1	0.28055	1.03496	2.23962	0.134514	0.860429	Unchanged
ENSG00000279569	TEC	novel transcript	AC020763.4	-0.473689	0.385334	2.23543	0.134879	0.860476	Unchanged
ENSG00000260988	lncRNA	novel transcript	AC090260.1	0.793679	-1.77897	2.23614	0.134818	0.860476	Unchanged
ENSG00000260855	lncRNA	novel transcript	AL591848.3	0.149822	3.05804	2.23591	0.134837	0.860476	Unchanged
ENSG00000234664	processed_pseudogene	high mobility group nucleosomal binding domain 2 pseudogene 5 [Source:HGNC Symbol;Acc:HGNC:33568]	HMGN2P5	-0.249796	1.72738	2.23549	0.134874	0.860476	Unchanged
ENSG00000189343	processed_pseudogene	ribosomal protein S2 pseudogene 46 [Source:HGNC Symbol;Acc:HGNC:35839]	RPS2P46	-0.290953	0.849076	2.23596	0.134833	0.860476	Unchanged
ENSG00000178081	transcribed_unprocessed_pseudogene	ULK4 pseudogene 3 [Source:HGNC Symbol;Acc:HGNC:15777]	ULK4P3	-0.499403	-0.564787	2.23806	0.13465	0.860476	Unchanged
ENSG00000250979	unprocessed_pseudogene	transient receptor potential cation channel, subfamily A, member 1 (TRPA1) pseudogene	AC022905.1	-0.068972	6.24726	2.23199	0.135179	0.860841	Unchanged
ENSG00000265800	lncRNA	novel transcript, sense intronic to HN1	AC022211.3	0.199378	1.90722	2.2298	0.135371	0.86123	Unchanged
ENSG00000206754	snoRNA	small nucleolar RNA, C/D box 101 [Source:HGNC Symbol;Acc:HGNC:32764]	SNORD101	-0.692402	-1.32469	2.22561	0.135739	0.861759	Unchanged
ENSG00000222345	snoRNA	small nucleolar RNA, C/D box 19C [Source:HGNC Symbol;Acc:HGNC:52224]	SNORD19C	0.5072	-0.237491	2.22474	0.135815	0.861963	Unchanged
ENSG00000239280	processed_pseudogene	pseudogene similar to part of dihydrolipoamide branched chain transacylase E2 DBT	AC108693.1	0.632284	-0.680824	2.22244	0.136018	0.862405	Unchanged
ENSG00000274248	lncRNA	novel transcript	AJ011932.1	0.833379	-1.12847	2.22273	0.135993	0.862405	Unchanged
ENSG00000203684	lncRNA	IBA57 divergent transcript [Source:HGNC Symbol;Acc:HGNC:32062]	IBA57-DT	0.814059	-1.66774	2.22015	0.13622	0.862562	Unchanged
ENSG00000253554	lncRNA	long intergenic non-protein coding RNA 1414 [Source:HGNC Symbol;Acc:HGNC:50707]	LINC01414	0.351088	0.123431	2.22114	0.136133	0.862562	Unchanged
ENSG00000278922	TEC	novel transcript	AC002310.5	-0.761404	-1.52783	2.21171	0.136967	0.863426	Unchanged
ENSG00000261542	lncRNA	novel transcript	AC011978.1	-0.425221	0.196023	2.21487	0.136687	0.863426	Unchanged
ENSG00000272927	lncRNA	novel transcript, antisense to PDE6B	AC107464.2	0.307841	1.00914	2.20537	0.137531	0.863426	Unchanged
ENSG00000284602	lncRNA	novel transcript	AL031432.4	0.257305	1.36267	2.2082	0.137279	0.863426	Unchanged
ENSG00000258768	lncRNA	novel transcript	AL356019.2	-0.258867	1.5167	2.20586	0.137487	0.863426	Unchanged
ENSG00000271614	lncRNA	ATP2B1 antisense RNA 1 [Source:HGNC Symbol;Acc:HGNC:27883]	ATP2B1-AS1	0.29992	0.921014	2.21055	0.13707	0.863426	Unchanged
ENSG00000225137	processed_pseudogene	dynein cytoplasmic 1 intermediate chain 2 pseudogene 1 [Source:HGNC Symbol;Acc:HGNC:45012]	DYNC1I2P1	-0.503403	-0.433485	2.21089	0.137039	0.863426	Unchanged
ENSG00000272274	lncRNA	long intergenic non-protein coding RNA 551 [Source:HGNC Symbol;Acc:HGNC:43691]	LINC00551	-0.714525	-1.5041	2.21457	0.136713	0.863426	Unchanged
ENSG00000239122	snRNA	RNA, U2 small nuclear 11, pseudogene [Source:HGNC Symbol;Acc:HGNC:48504]	RNU2-11P	0.860672	-1.75038	2.20421	0.137635	0.863426	Unchanged
ENSG00000214203	processed_pseudogene	ribosomal protein S4X pseudogene 1 [Source:HGNC Symbol;Acc:HGNC:32444]	RPS4XP1	0.793175	-1.37809	2.21081	0.137047	0.863426	Unchanged
ENSG00000246273	lncRNA	SBF2 antisense RNA 1 [Source:HGNC Symbol;Acc:HGNC:27438]	SBF2-AS1	0.124377	3.54124	2.21215	0.136927	0.863426	Unchanged
ENSG00000273249	lncRNA	WDR5 divergent transcript [Source:HGNC Symbol;Acc:HGNC:55141]	WDR5-DT	0.7914	-1.62826	2.21308	0.136845	0.863426	Unchanged
ENSG00000279281	TEC	TEC	AC015883.1	0.559116	1.01903	2.20083	0.137937	0.863611	Unchanged
ENSG00000276571	lncRNA	novel transcript, antisense to C16orf62	AC002550.2	-0.303051	0.932578	2.16586	0.141106	0.864353	Unchanged
ENSG00000279853	TEC	tec	AC004453.1	0.415845	-0.00472822	2.13779	0.143709	0.864353	Unchanged
ENSG00000279996	TEC	TEC	AC004491.1	0.706636	-0.815413	2.18228	0.139607	0.864353	Unchanged
ENSG00000225792	lncRNA	novel transcript	AC004540.2	-0.247182	1.7888	2.18934	0.138969	0.864353	Unchanged
ENSG00000272745	lncRNA	novel transcript	AC004948.1	0.434907	-0.324687	2.11092	0.146252	0.864353	Unchanged
ENSG00000272328	lncRNA	novel transcript, antisense to ICA1	AC007128.2	-0.625341	-1.48038	2.11828	0.145549	0.864353	Unchanged
ENSG00000273035	lncRNA	novel transcript, sense intronic to MAP4K3	AC007684.2	-0.879315	-1.57722	2.13175	0.144276	0.864353	Unchanged
ENSG00000255983	lncRNA	novel transcript	AC007848.1	-0.197103	2.11412	2.19539	0.138424	0.864353	Unchanged
ENSG00000260778	lncRNA	novel transcript	AC009065.4	-0.432005	-0.319274	2.09191	0.148081	0.864353	Unchanged
ENSG00000259952	lncRNA	novel transcript, antisense to MAZ	AC009133.2	-0.372673	1.46373	2.15228	0.142358	0.864353	Unchanged
ENSG00000234352	lncRNA	novel transcript, antisense to CHRM2	AC009264.1	0.69302	-1.68149	2.17882	0.139922	0.864353	Unchanged
ENSG00000213976	unprocessed_pseudogene	zinc finger protein pseudogene	AC010615.1	-0.203864	2.35889	2.14696	0.142852	0.864353	Unchanged
ENSG00000269976	lncRNA	novel transcript	AC012065.2	-0.812926	-1.55228	2.14664	0.142882	0.864353	Unchanged
ENSG00000261670	lncRNA	novel transcript	AC012213.2	-0.78573	-1.70831	2.09789	0.147502	0.864353	Unchanged
ENSG00000270091	lncRNA	novel transcript	AC015726.1	-0.305248	0.728821	2.1266	0.144762	0.864353	Unchanged
ENSG00000259658	transcribed_unprocessed_pseudogene	ubiquitin-conjugating enzyme E2Q family member 2 (UBE2Q2) pseudogene	AC027559.1	-0.394672	0.0774582	2.15667	0.141952	0.864353	Unchanged
ENSG00000257159	processed_pseudogene	zinc finger protein pseudogene	AC084033.1	0.738101	-1.24293	2.12586	0.144832	0.864353	Unchanged
ENSG00000274363	lncRNA	novel transcript	AC087742.1	0.725901	-1.2527	2.16547	0.141141	0.864353	Unchanged
ENSG00000272979	lncRNA	novel transcript, antisense to MFSD6	AC093388.1	-0.449294	-0.367531	2.11717	0.145655	0.864353	Unchanged
ENSG00000287870	lncRNA	novel transcript	AC093433.2	0.571688	-0.595868	2.09951	0.147346	0.864353	Unchanged
ENSG00000288032	lncRNA	novel transcript, sense intronic to GMPS	AC104472.5	1.01661	-1.83758	2.18512	0.13935	0.864353	Unchanged
ENSG00000278052	lncRNA	novel transcript	AC104985.2	0.998906	-2.03037	2.13773	0.143714	0.864353	Unchanged
ENSG00000228933	lncRNA	novel transcript	AC107419.1	0.180885	2.11293	2.13508	0.143963	0.864353	Unchanged
ENSG00000287762	lncRNA	novel transcript, antisense to LIMCH1	AC108050.1	0.863471	-1.41141	2.09957	0.14734	0.864353	Unchanged
ENSG00000279013	TEC	tec	AC110774.1	-0.264035	0.773109	2.13822	0.143668	0.864353	Unchanged
ENSG00000280407	TEC	TEC	AC132872.4	-0.82977	-1.64117	2.11269	0.146082	0.864353	Unchanged
ENSG00000279827	TEC	novel transcript	AC136469.2	-0.270548	1.67092	2.1854	0.139325	0.864353	Unchanged
ENSG00000272379	lncRNA	novel transcript	AL008729.2	-0.336254	0.937594	2.16826	0.140886	0.864353	Unchanged
ENSG00000225450	lncRNA	novel transcript	AL021707.1	-0.68912	-1.25245	2.11653	0.145716	0.864353	Unchanged
ENSG00000285564	lncRNA	novel transcript	AL031121.2	0.870166	-1.53976	2.15988	0.141656	0.864353	Unchanged
ENSG00000268575	lncRNA	novel transcript, readthrough between SLC35E2 and CDK11A	AL031282.2	0.143665	3.19409	2.09733	0.147556	0.864353	Unchanged
ENSG00000286311	lncRNA	novel transcript, antisense to NOL4L	AL034550.3	-0.23079	1.4569	2.15282	0.142308	0.864353	Unchanged
ENSG00000286327	lncRNA	novel transcript	AL035427.2	-0.718482	-1.08261	2.14307	0.143215	0.864353	Unchanged
ENSG00000288398	lncRNA	novel transcript	AL109627.1	-0.143049	3.19689	2.16102	0.141551	0.864353	Unchanged
ENSG00000276672	lncRNA	novel transcript, sense intronic to RFC3	AL161891.1	-0.120209	3.52326	2.09606	0.147679	0.864353	Unchanged
ENSG00000258938	lncRNA	novel transcript, antisense to BRMS1L	AL162311.3	-0.37466	-0.119298	2.1732	0.140433	0.864353	Unchanged
ENSG00000243155	lncRNA	novel transcript	AL162431.1	-0.236559	1.51994	2.10911	0.146425	0.864353	Unchanged
ENSG00000275741	lncRNA	novel transcript, antisense to IRS2	AL162497.1	-0.559184	-1.06516	2.17012	0.140715	0.864353	Unchanged
ENSG00000232883	processed_pseudogene	ribosomal protein, large, P0 (RPLP0) pseudogene	AL451081.2	-0.833577	-1.96316	2.17404	0.140357	0.864353	Unchanged
ENSG00000275485	lncRNA	novel transcript, sense intronic to N6AMT2	AL512652.1	0.747814	-1.34561	2.11851	0.145528	0.864353	Unchanged
ENSG00000279910	TEC	TEC	AL731532.1	-1.28489	-1.88316	2.19132	0.13879	0.864353	Unchanged
ENSG00000254771	processed_pseudogene	EA domain family member 1 (SV40 transcriptional enhancer factor) (TEAD1)	AP001893.2	0.875277	-1.45647	2.16124	0.141531	0.864353	Unchanged
ENSG00000226864	transcribed_unitary_pseudogene	ATE1 antisense RNA 1 [Source:HGNC Symbol;Acc:HGNC:49496]	ATE1-AS1	-0.269604	1.30166	2.14955	0.142612	0.864353	Unchanged
ENSG00000229273	processed_pseudogene	novel pseudogene	BX664615.1	0.656793	-1.3246	2.16556	0.141134	0.864353	Unchanged
ENSG00000230584	processed_pseudogene	chaperonin containing TCP1 subunit 5 pseudogene 2 [Source:HGNC Symbol;Acc:HGNC:35139]	CCT5P2	0.943833	-1.75027	2.18932	0.138971	0.864353	Unchanged
ENSG00000232553	processed_pseudogene	CDC like kinase 2, pseudogene 1 [Source:HGNC Symbol;Acc:HGNC:2070]	CLK2P1	0.642705	-1.1748	2.16296	0.141372	0.864353	Unchanged
ENSG00000226450	unprocessed_pseudogene	ccytochrome P450 family 2 subfamily D member 8, pseudogene [Source:HGNC Symbol;Acc:HGNC:2628]	CYP2D8P	0.522312	-0.688034	2.13915	0.143582	0.864353	Unchanged
ENSG00000267395	lncRNA	DM1 locus antisense RNA [Source:HGNC Symbol;Acc:HGNC:53125]	DM1-AS	0.870863	-1.69477	2.18137	0.139691	0.864353	Unchanged
ENSG00000227382	processed_pseudogene	eukaryotic translation initiation factor 4A2 pseudogene 2 [Source:HGNC Symbol;Acc:HGNC:45099]	EIF4A2P2	0.703173	-1.03874	2.1342	0.144045	0.864353	Unchanged
ENSG00000260852	lncRNA	FBXL19 antisense RNA 1 [Source:HGNC Symbol;Acc:HGNC:27557]	FBXL19-AS1	0.112583	3.72247	2.14299	0.143222	0.864353	Unchanged
ENSG00000215548	unprocessed_pseudogene	FSHD region gene 1 family member J, pseudogene [Source:HGNC Symbol;Acc:HGNC:51768]	FRG1JP	0.222105	1.83869	2.17234	0.140513	0.864353	Unchanged
ENSG00000280832	lncRNA	G-quadruplex forming sequence containing lncRNA [Source:HGNC Symbol;Acc:HGNC:48645]	GSEC	0.203926	2.13393	2.16047	0.141602	0.864353	Unchanged
ENSG00000274471	transcribed_unprocessed_pseudogene	hect domain and RLD 2 pseudogene 7 [Source:NCBI gene (formerly Entrezgene);Acc:100132101]	HERC2P7	0.198074	2.24079	2.17462	0.140304	0.864353	Unchanged
ENSG00000224116	lncRNA	INHBA antisense RNA 1 [Source:HGNC Symbol;Acc:HGNC:40303]	INHBA-AS1	0.734538	-2.01357	2.12636	0.144785	0.864353	Unchanged
ENSG00000272767	lncRNA	JMJD1C antisense RNA 1 [Source:HGNC Symbol;Acc:HGNC:28222]	JMJD1C-AS1	-0.257281	1.57208	2.13699	0.143784	0.864353	Unchanged
ENSG00000230426	lncRNA	long intergenic non-protein coding RNA 1036 [Source:HGNC Symbol;Acc:HGNC:49024]	LINC01036	-0.143623	2.8885	2.09632	0.147654	0.864353	Unchanged
ENSG00000281404	lncRNA	long intergenic non-protein coding RNA 1176 [Source:HGNC Symbol;Acc:HGNC:49548]	LINC01176	-0.206541	2.77802	2.18254	0.139584	0.864353	Unchanged
ENSG00000224957	lncRNA	long intergenic non-protein coding RNA 1266 [Source:HGNC Symbol;Acc:HGNC:50309]	LINC01266	-0.323662	0.717283	2.10249	0.14706	0.864353	Unchanged
ENSG00000245812	lncRNA	long intergenic non-protein coding RNA 2202 [Source:HGNC Symbol;Acc:HGNC:53068]	LINC02202	0.738204	-1.45673	2.15816	0.141815	0.864353	Unchanged
ENSG00000234456	lncRNA	MAGI2 antisense RNA 3 [Source:HGNC Symbol;Acc:HGNC:40862]	MAGI2-AS3	-0.0618732	7.81916	2.14439	0.143092	0.864353	Unchanged
ENSG00000264589	lncRNA	MAPT antisense RNA 1 [Source:HGNC Symbol;Acc:HGNC:43738]	MAPT-AS1	0.571761	-1.37866	2.10004	0.147295	0.864353	Unchanged
ENSG00000215417	lncRNA	miR-17-92a-1 cluster host gene [Source:HGNC Symbol;Acc:HGNC:23564]	MIR17HG	0.130079	4.01366	2.13781	0.143706	0.864353	Unchanged
ENSG00000223749	lncRNA	MIR503 host gene [Source:HGNC Symbol;Acc:HGNC:28258]	MIR503HG	0.571148	-0.86825	2.10692	0.146634	0.864353	Unchanged
ENSG00000266124	miRNA	microRNA 5587 [Source:HGNC Symbol;Acc:HGNC:43508]	MIR5587	-0.787939	-1.40017	2.12193	0.145203	0.864353	Unchanged
ENSG00000224870	lncRNA	MRPL20 antisense RNA 1 [Source:HGNC Symbol;Acc:HGNC:27125]	MRPL20-AS1	0.11308	4.28175	2.1439	0.143138	0.864353	Unchanged
ENSG00000255397	processed_pseudogene	nuclear autoantigenic sperm protein pseudogene 1 [Source:HGNC Symbol;Acc:HGNC:29910]	NASPP1	0.543083	-0.527972	2.10266	0.147043	0.864353	Unchanged
ENSG00000246695	lncRNA	RASSF8 antisense RNA 1 [Source:HGNC Symbol;Acc:HGNC:48637]	RASSF8-AS1	0.0844945	4.88556	2.15631	0.141986	0.864353	Unchanged
ENSG00000240877	misc_RNA	RNA, 7SL, cytoplasmic 521, pseudogene [Source:HGNC Symbol;Acc:HGNC:46537]	RN7SL521P	0.698566	-1.10051	2.13549	0.143924	0.864353	Unchanged
ENSG00000224903	lncRNA	RNF32 antisense RNA 1 [Source:HGNC Symbol;Acc:HGNC:40798]	RNF32-AS1	0.148638	3.02548	2.11112	0.146232	0.864353	Unchanged
ENSG00000252755	snRNA	RNA, U6 small nuclear 703, pseudogene [Source:HGNC Symbol;Acc:HGNC:47666]	RNU6-703P	0.999941	-1.75008	2.13188	0.144264	0.864353	Unchanged
ENSG00000240435	processed_pseudogene	ribosomal protein S12 pseudogene 27 [Source:HGNC Symbol;Acc:HGNC:35892]	RPS12P27	-0.936364	-1.8677	2.18934	0.138969	0.864353	Unchanged
ENSG00000224261	processed_pseudogene	ribosomal protein SA pseudogene 18 [Source:HGNC Symbol;Acc:HGNC:36106]	RPSAP18	-0.788555	-1.62823	2.14695	0.142853	0.864353	Unchanged
ENSG00000175741	processed_pseudogene	RWD domain containing 4 pseudogene 2 [Source:HGNC Symbol;Acc:HGNC:23754]	RWDD4P2	0.730394	-1.1841	2.13173	0.144277	0.864353	Unchanged
ENSG00000208772	snoRNA	small nucleolar RNA, C/D box 94 [Source:HGNC Symbol;Acc:HGNC:32756]	SNORD94	0.632182	-1.03918	2.14217	0.143299	0.864353	Unchanged
ENSG00000106610	transcribed_unprocessed_pseudogene	stromal antigen 3-like 4 (pseudogene) [Source:HGNC Symbol;Acc:HGNC:33887]	STAG3L4	-0.0946932	4.26628	2.12704	0.14472	0.864353	Unchanged
ENSG00000278338	lncRNA	VWA8 antisense RNA 1 (head to head) [Source:HGNC Symbol;Acc:HGNC:44270]	VWA8-AS1	-0.732573	-1.70851	2.17498	0.140271	0.864353	Unchanged
ENSG00000274118	misc_RNA	Y RNA [Source:RFAM;Acc:RF00019]	Y_RNA	0.880207	-1.82276	2.17508	0.140262	0.864353	Unchanged
ENSG00000224596	lncRNA	ZMIZ1 antisense RNA 1 [Source:HGNC Symbol;Acc:HGNC:27433]	ZMIZ1-AS1	0.339196	0.304716	2.1047	0.146847	0.864353	Unchanged
ENSG00000018607	transcribed_unprocessed_pseudogene	zinc finger protein 806 [Source:HGNC Symbol;Acc:HGNC:33228]	ZNF806	-0.701182	-1.28314	2.13013	0.144429	0.864353	Unchanged
ENSG00000279198	TEC	TEC	AC008894.3	-0.267938	1.305	2.08791	0.148469	0.865048	Unchanged
ENSG00000248773	lncRNA	novel transcript	AC108727.1	0.589153	-0.883806	2.08835	0.148427	0.865048	Unchanged
ENSG00000266235	miRNA	microRNA 3176 [Source:HGNC Symbol;Acc:HGNC:38345]	MIR3176	-0.482313	0.368932	2.08632	0.148623	0.865048	Unchanged
ENSG00000244313	processed_pseudogene	ribosomal protein S10 (RPS10) pseudogene	AC024293.1	0.258133	1.71688	2.08248	0.148998	0.865773	Unchanged
ENSG00000242021	lncRNA	novel transcript	AC112493.1	0.739552	-1.43409	2.07719	0.149515	0.865773	Unchanged
ENSG00000255672	lncRNA	novel transcript	AP002892.1	0.433424	-0.469205	2.08344	0.148904	0.865773	Unchanged
ENSG00000258739	transcribed_processed_pseudogene	enolase 1 pseudogene 2 [Source:HGNC Symbol;Acc:HGNC:37943]	ENO1P2	-0.389202	0.0164186	2.07754	0.149481	0.865773	Unchanged
ENSG00000223705	transcribed_unprocessed_pseudogene	NSUN5 pseudogene 1 [Source:HGNC Symbol;Acc:HGNC:19146]	NSUN5P1	0.129205	4.29023	2.07757	0.149478	0.865773	Unchanged
ENSG00000185596	transcribed_unprocessed_pseudogene	WASP family homolog 3, pseudogene [Source:HGNC Symbol;Acc:HGNC:24362]	WASH3P	0.188526	2.03361	2.08178	0.149066	0.865773	Unchanged
ENSG00000278416	translated_unprocessed_pseudogene	PMS1 homolog 2, mismatch repair system component pseudogene 2 [Source:HGNC Symbol;Acc:HGNC:9127]	PMS2P2	-0.327941	0.602707	2.0749	0.14974	0.865912	Unchanged
ENSG00000189423	transcribed_unprocessed_pseudogene	ubiquitin specific peptidase 32 pseudogene 3 [Source:HGNC Symbol;Acc:HGNC:43576]	USP32P3	-0.238942	1.79774	2.07442	0.149786	0.865912	Unchanged
ENSG00000278946	lncRNA	novel transcript, antisense to PCDHA10	AC005609.4	-0.360722	0.199309	2.07316	0.149911	0.865953	Unchanged
ENSG00000278383	lncRNA	novel transcript, antisense to ZNF337	AL031673.1	0.379308	-0.0786176	2.06956	0.150265	0.866096	Unchanged
ENSG00000286650	lncRNA	novel transcript	AL139234.1	0.696089	-1.60249	2.06411	0.150803	0.866096	Unchanged
ENSG00000238250	lncRNA	ST6GAL2 intronic transcript 1 [Source:HGNC Symbol;Acc:HGNC:41380]	ST6GAL2-IT1	-0.637473	-1.14639	2.07238	0.149988	0.866096	Unchanged
ENSG00000260350	lncRNA	novel transcript, antisense to PMM2	AC012173.1	0.397813	0.0812976	2.06341	0.150872	0.866114	Unchanged
ENSG00000288663	lncRNA	novel protein, readthrough PFDN5-C12orf10	AC073611.1	0.245852	1.40596	2.05965	0.151245	0.86658	Unchanged
ENSG00000214198	transcribed_unitary_pseudogene	tetratricopeptide repeat domain 41, pseudogene [Source:HGNC Symbol;Acc:HGNC:49210]	TTC41P	-0.313119	0.739919	2.06023	0.151187	0.86658	Unchanged
ENSG00000249863	processed_pseudogene	synaptotagmin binding, cytoplasmic RNA interacting protein (SYNCRIP) pseudogene	AC021106.1	-0.550611	-0.252603	2.05826	0.151383	0.8668	Unchanged
ENSG00000167912	lncRNA	novel transcript	AC090152.1	0.145193	2.66529	2.05549	0.151659	0.8668	Unchanged
ENSG00000287043	lncRNA	novel transcript, sense intronic to ADARB2	AL392083.2	-0.726784	-1.51571	2.05766	0.151443	0.8668	Unchanged
ENSG00000286214	lncRNA	COPG2 imprinted transcript 1	AUXG01000058.1	-0.575312	-0.282377	2.0561	0.151597	0.8668	Unchanged
ENSG00000226752	transcribed_unitary_pseudogene	cutA divalent cation tolerance like, pseudogene [Source:HGNC Symbol;Acc:HGNC:27367]	CUTALP	-0.0767591	5.52091	2.05715	0.151494	0.8668	Unchanged
ENSG00000183935	transcribed_processed_pseudogene	5-hydroxytryptamine receptor 7 pseudogene 1 [Source:HGNC Symbol;Acc:HGNC:30411]	HTR7P1	0.293482	1.32918	2.05803	0.151406	0.8668	Unchanged
ENSG00000280383	lncRNA	novel transcript, sense overlapping ATXN10	Z95331.1	0.305525	2.01489	2.05578	0.15163	0.8668	Unchanged
ENSG00000276791	lncRNA	novel transcript	AC092117.1	0.344263	0.558871	2.05022	0.152184	0.866807	Unchanged
ENSG00000248180	processed_pseudogene	glyceraldehyde-3-phosphate dehydrogenase pseudogene 60 [Source:HGNC Symbol;Acc:HGNC:4153]	GAPDHP60	0.683266	-1.3458	2.0501	0.152197	0.866807	Unchanged
ENSG00000250903	lncRNA	GMDS divergent transcript [Source:HGNC Symbol;Acc:HGNC:48993]	GMDS-DT	-0.159657	2.5836	2.04773	0.152433	0.867274	Unchanged
ENSG00000198153	unprocessed_pseudogene	zinc finger protein 849, pseudogene [Source:HGNC Symbol;Acc:HGNC:34389]	ZNF849P	0.294611	0.939671	2.04573	0.152634	0.867539	Unchanged
ENSG00000258072	processed_pseudogene	programmed cell death 2 (PDCD2) pseudogene	AC126177.6	0.496866	-0.634686	2.0438	0.152828	0.867626	Unchanged
ENSG00000281398	lncRNA	small nucleolar RNA host gene 4 [Source:HGNC Symbol;Acc:HGNC:32964]	SNHG4	0.091085	4.59214	2.04446	0.152761	0.867626	Unchanged
ENSG00000239719	processed_pseudogene	ribosomal protein L36a (RPL36A) pseudogene	AC004890.1	0.522168	-0.576899	2.03878	0.153333	0.867685	Unchanged
ENSG00000274427	lncRNA	novel transcript, sense intronic to RILPL1	AC145423.1	0.734864	-1.02153	2.0353	0.153684	0.867685	Unchanged
ENSG00000226396	processed_pseudogene	ribosomal protein S14 (RPS14) pseudogene	AL031727.1	0.453621	-0.257557	2.02989	0.154232	0.867685	Unchanged
ENSG00000272223	lncRNA	novel transcript, antisense to RRP36	AL136304.1	0.532011	-0.971487	2.03462	0.153753	0.867685	Unchanged
ENSG00000230537	lncRNA	novel transcript	AL158071.2	-0.616218	-0.98788	2.03222	0.153996	0.867685	Unchanged
ENSG00000226535	processed_pseudogene	karyopherin alpha 2 (RAG cohort 1, importin alpha 1) (KPNA2) pseudogene	AL445487.1	0.727958	-1.52779	2.02871	0.154352	0.867685	Unchanged
ENSG00000276740	lncRNA	novel transcript, sense intronic to FAM155A	AL445649.1	0.386319	0.154225	2.03652	0.153561	0.867685	Unchanged
ENSG00000283141	lncRNA	long intergenic non-protein coding RNA 2666 [Source:HGNC Symbol;Acc:HGNC:54152]	LINC02666	0.416034	-0.37869	2.03569	0.153645	0.867685	Unchanged
ENSG00000227081	processed_pseudogene	ribosomal protein S27 (RPS27) pseudogene	AC005912.1	-0.463943	-0.29355	2.02706	0.154519	0.868013	Unchanged
ENSG00000236194	lncRNA	novel transcript, sense intronic to STAT5B	AC099811.1	0.599026	-0.416521	2.02394	0.154837	0.868013	Unchanged
ENSG00000233994	processed_pseudogene	GDP dissociation inhibitor 2 pseudogene 2 [Source:HGNC Symbol;Acc:HGNC:37976]	GDI2P2	-0.605148	-1.17471	2.02614	0.154612	0.868013	Unchanged
ENSG00000234208	lncRNA	novel transcript, sense intronic to THOC5	AC005529.1	0.77458	-1.76434	2.02307	0.154926	0.868156	Unchanged
ENSG00000256690	lncRNA	novel transcript	AP001160.1	0.65816	-1.52789	2.02071	0.155167	0.868348	Unchanged
ENSG00000248449	transcribed_unitary_pseudogene	protocadherin gamma subfamily B, 8 pseudogene [Source:HGNC Symbol;Acc:HGNC:8715]	PCDHGB8P	-0.510511	-0.793257	2.01793	0.15545	0.868348	Unchanged
ENSG00000212607	snoRNA	small nucleolar RNA, H/ACA box 3B [Source:HGNC Symbol;Acc:HGNC:32638]	SNORA3B	0.695509	-1.28318	2.0184	0.155403	0.868348	Unchanged
ENSG00000277182	lncRNA	novel transcript, antisense to PCGF2	AC006449.5	-0.274805	1.25205	2.01662	0.155585	0.868352	Unchanged
ENSG00000264734	lncRNA	novel transcript	AC069061.2	0.401354	0.0649625	2.01314	0.155942	0.86871	Unchanged
ENSG00000272693	transcribed_unprocessed_pseudogene	nuclear protein 2, transcriptional regulator (NUPR2) pseudogene	AC073107.1	-0.32453	0.571405	2.00894	0.156374	0.86871	Unchanged
ENSG00000283045	lncRNA	novel transcript, sense intronic to GPATCH8	AC103703.1	0.990023	-1.82236	2.01371	0.155883	0.86871	Unchanged
ENSG00000231607	lncRNA	deleted in lymphocytic leukemia 2 [Source:HGNC Symbol;Acc:HGNC:13748]	DLEU2	0.110716	4.34545	2.00862	0.156407	0.86871	Unchanged
ENSG00000228499	processed_pseudogene	thymosin beta 10 pseudogene 1 [Source:HGNC Symbol;Acc:HGNC:41949]	TMSB10P1	-1.00318	-1.97955	2.01179	0.156081	0.86871	Unchanged
ENSG00000236780	lncRNA	long intergenic non-protein coding RNA 1829 [Source:HGNC Symbol;Acc:HGNC:52635]	LINC01829	0.330771	-0.0527362	2.00712	0.156563	0.869327	Unchanged
ENSG00000230291	processed_pseudogene	ribosomal protein L26 (RPL26) pseudogene	AC078817.1	-0.780454	-1.82265	2.00438	0.156845	0.870098	Unchanged
ENSG00000259941	lncRNA	novel transcript	AC084782.1	0.362602	0.235558	2.0021	0.157081	0.870468	Unchanged
ENSG00000287665	lncRNA	novel transcript, sense intronic to FOXK1	AC092428.1	0.64536	-0.729303	1.99052	0.158286	0.871155	Unchanged
ENSG00000263916	lncRNA	novel transcript, sense intronic to C18orf32	AC100778.2	0.459294	-0.189288	1.99268	0.158061	0.871155	Unchanged
ENSG00000273076	lncRNA	novel transcript, antisense to SUN2	AL021707.7	-0.925454	-1.69471	1.98975	0.158367	0.871155	Unchanged
ENSG00000272983	lncRNA	novel transcript	AL117339.3	0.205111	1.71453	1.99467	0.157853	0.871155	Unchanged
ENSG00000283696	lncRNA	novel transcript	AL592295.4	-0.471222	-0.602568	1.99671	0.157641	0.871155	Unchanged
ENSG00000251333	processed_pseudogene	reticulon 3 pseudogene 1 [Source:HGNC Symbol;Acc:HGNC:19212]	RTN3P1	0.73266	-1.4341	1.9933	0.157996	0.871155	Unchanged
ENSG00000227258	lncRNA	SMIM2 antisense RNA 1 [Source:HGNC Symbol;Acc:HGNC:42674]	SMIM2-AS1	-0.367982	-0.00051047	1.99095	0.158241	0.871155	Unchanged
ENSG00000127589	transcribed_processed_pseudogene	tubulin beta pseudogene 1 [Source:HGNC Symbol;Acc:HGNC:12414]	TUBBP1	0.216946	2.0833	1.98993	0.158348	0.871155	Unchanged
ENSG00000261433	lncRNA	novel transcript	AC002347.1	0.727884	-1.49204	1.97708	0.159699	0.871237	Unchanged
ENSG00000268030	lncRNA	novel transcript, antisense to KXD1	AC005253.1	0.786383	-1.54004	1.9439	0.163246	0.871237	Unchanged
ENSG00000261790	lncRNA	novel transcript	AC005606.2	-0.521261	-1.12809	1.98253	0.159124	0.871237	Unchanged
ENSG00000272622	lncRNA	novel transcript	AC010735.2	-0.829234	-1.64125	1.98642	0.158715	0.871237	Unchanged
ENSG00000280294	TEC	TEC	AC011008.2	0.15419	2.73946	1.94079	0.163583	0.871237	Unchanged
ENSG00000277170	lncRNA	novel transcript, sense intronic with DNAJA3	AC012676.3	0.670225	-1.54013	1.95327	0.162235	0.871237	Unchanged
ENSG00000270964	lncRNA	MAP2K5 divergent transcript [Source:HGNC Symbol;Acc:HGNC:55261]	AC016355.1	0.26744	0.81291	1.95831	0.161694	0.871237	Unchanged
ENSG00000278733	lncRNA	novel transcript, antisense to CCDC91	AC022079.2	0.670126	-1.38918	1.98659	0.158698	0.871237	Unchanged
ENSG00000260777	lncRNA	novel transcript	AC061975.1	0.72487	-1.65459	1.94413	0.163221	0.871237	Unchanged
ENSG00000264659	lncRNA	novel transcript, antisense to RAB37	AC064805.2	0.428676	-0.362517	1.94289	0.163355	0.871237	Unchanged
ENSG00000287031	lncRNA	novel transcript	AC093307.1	0.65736	-1.24274	1.94405	0.163229	0.871237	Unchanged
ENSG00000262223	lncRNA	novel transcript	AC110285.1	-0.289353	0.393034	1.9862	0.158738	0.871237	Unchanged
ENSG00000250999	lncRNA	novel transcript	AC136604.2	0.544347	-0.971705	1.94257	0.163389	0.871237	Unchanged
ENSG00000288548	lncRNA	novel transcript	AL035653.1	-0.7624	-1.34535	1.94146	0.16351	0.871237	Unchanged
ENSG00000219682	processed_pseudogene	nucleoporin 50kD (NUP50) pseudogene	AL133268.1	0.879757	-1.86795	1.95846	0.161678	0.871237	Unchanged
ENSG00000260947	lncRNA	novel transcript	AL356489.2	-0.0919634	4.51212	1.96617	0.160855	0.871237	Unchanged
ENSG00000231864	lncRNA	novel transcript	AL807752.3	-0.676294	-1.22288	1.96797	0.160664	0.871237	Unchanged
ENSG00000242553	lncRNA	novel transcript, antisense to DSCR3	AP001432.1	0.512475	-0.49184	1.93961	0.163711	0.871237	Unchanged
ENSG00000260318	processed_pseudogene	cytochrome c oxidase subunit 6C pseudogene 1 [Source:HGNC Symbol;Acc:HGNC:2286]	COX6CP1	0.567304	-0.930774	1.97261	0.160171	0.871237	Unchanged
ENSG00000259736	lncRNA	CRTC3 antisense RNA 1 [Source:HGNC Symbol;Acc:HGNC:51433]	CRTC3-AS1	0.485551	-0.303854	1.9418	0.163474	0.871237	Unchanged
ENSG00000235436	transcribed_unprocessed_pseudogene	DPY19L2 pseudogene 4 [Source:HGNC Symbol;Acc:HGNC:22176]	DPY19L2P4	0.279458	0.817325	1.96999	0.160449	0.871237	Unchanged
ENSG00000281189	lncRNA	gastric carcinoma proliferation enhancing transcript 1 [Source:HGNC Symbol;Acc:HGNC:49425]	GHET1	-0.479762	-0.52749	1.94771	0.162834	0.871237	Unchanged
ENSG00000251583	processed_pseudogene	MFF pseudogene 2 [Source:HGNC Symbol;Acc:HGNC:54540]	MFFP2	-0.716245	-1.58972	1.95434	0.16212	0.871237	Unchanged
ENSG00000272150	transcribed_unprocessed_pseudogene	NBPF member 25, pseudogene [Source:HGNC Symbol;Acc:HGNC:45046]	NBPF25P	-0.247235	1.77038	1.96294	0.161199	0.871237	Unchanged
ENSG00000255909	processed_pseudogene	programmed cell death 5 pseudogene 1 [Source:HGNC Symbol;Acc:HGNC:49885]	PDCD5P1	-0.681771	-1.26249	1.96973	0.160476	0.871237	Unchanged
ENSG00000254389	lncRNA	RHPN1 antisense RNA 1 (head to head) [Source:HGNC Symbol;Acc:HGNC:28457]	RHPN1-AS1	0.492676	-0.681203	1.9857	0.158791	0.871237	Unchanged
ENSG00000200403	snRNA	RNA, U6 small nuclear 1099, pseudogene [Source:HGNC Symbol;Acc:HGNC:48062]	RNU6-1099P	0.661389	-1.28305	1.97442	0.15998	0.871237	Unchanged
ENSG00000241157	processed_pseudogene	ribosomal protein L32 pseudogene 32 [Source:HGNC Symbol;Acc:HGNC:36024]	RPL32P32	-0.677309	-1.1652	1.9618	0.161321	0.871237	Unchanged
ENSG00000137970	processed_pseudogene	ribosomal protein L7 pseudogene 9 [Source:HGNC Symbol;Acc:HGNC:37028]	RPL7P9	0.348621	0.338886	1.96786	0.160675	0.871237	Unchanged
ENSG00000224631	transcribed_processed_pseudogene	RPS27A pseudogene 16 [Source:HGNC Symbol;Acc:HGNC:36855]	RPS27AP16	-0.21036	1.70228	1.96095	0.161412	0.871237	Unchanged
ENSG00000231822	processed_pseudogene	SMC3 pseudogene 1 [Source:HGNC Symbol;Acc:HGNC:54642]	SMC3P1	0.685209	-1.49255	1.97623	0.159788	0.871237	Unchanged
ENSG00000231587	snoRNA	small nucleolar RNA, C/D box 62B [Source:HGNC Symbol;Acc:HGNC:23031]	SNORD62B	-0.358321	0.00777752	1.95144	0.162432	0.871237	Unchanged
ENSG00000189136	transcribed_unprocessed_pseudogene	ubiquitin conjugating enzyme E2 Q2 pseudogene 1 [Source:HGNC Symbol;Acc:HGNC:37439]	UBE2Q2P1	-0.181181	1.88424	1.98372	0.158999	0.871237	Unchanged
ENSG00000226314	transcribed_unprocessed_pseudogene	zinc finger protein 192 pseudogene 1 [Source:HGNC Symbol;Acc:HGNC:18777]	ZNF192P1	0.200704	1.89531	1.97993	0.159398	0.871237	Unchanged
ENSG00000270547	lncRNA	long intergenic non-protein coding RNA 1235 [Source:HGNC Symbol;Acc:HGNC:49769]	LINC01235	-0.653883	-1.38923	1.93534	0.164175	0.872081	Unchanged
ENSG00000253771	transcribed_unprocessed_pseudogene	transmembrane phosphoinositide 3-phosphatase and tensin homolog 2 pseudogene 1 [Source:HGNC Symbol;Acc:HGNC:35196]	TPTE2P1	-0.486245	-0.899008	1.93578	0.164127	0.872081	Unchanged
ENSG00000242628	lncRNA	novel transcript	AC009228.1	-0.316363	0.76225	1.93373	0.164351	0.872538	Unchanged
ENSG00000287449	lncRNA	novel transcript	AC108019.2	-0.984735	-1.73579	1.93098	0.164651	0.872771	Unchanged
ENSG00000232623	lncRNA	MRAP antisense RNA 1 [Source:HGNC Symbol;Acc:HGNC:40108]	MRAP-AS1	-0.583347	-0.72202	1.93122	0.164624	0.872771	Unchanged
ENSG00000229806	processed_pseudogene	ribosomal protein S15 pseudogene 5 [Source:HGNC Symbol;Acc:HGNC:35536]	RPS15P5	0.787725	-1.52779	1.93047	0.164707	0.872771	Unchanged
ENSG00000228363	lncRNA	novel transcript	AC015971.1	-0.759651	-1.65444	1.91094	0.166859	0.873341	Unchanged
ENSG00000272661	lncRNA	novel transcript, antisense to SMARCD3	AC021097.1	0.394233	-0.100942	1.92633	0.16516	0.873341	Unchanged
ENSG00000236723	lncRNA	novel transcript, antisense to CPT2	AL606760.2	-0.325164	0.554997	1.92209	0.165627	0.873341	Unchanged
ENSG00000278879	TEC	TEC	AP000560.1	-0.248972	1.77	1.91937	0.165927	0.873341	Unchanged
ENSG00000233956	processed_pseudogene	basic transcription factor 3 pseudogene 6 [Source:HGNC Symbol;Acc:HGNC:23765]	BTF3P6	0.589288	-0.979895	1.91465	0.166448	0.873341	Unchanged
ENSG00000183250	lncRNA	long intergenic non-protein coding RNA 1547 [Source:HGNC Symbol;Acc:HGNC:15707]	LINC01547	0.147706	2.82713	1.92167	0.165672	0.873341	Unchanged
ENSG00000213801	transcribed_processed_pseudogene	zinc finger protein 321, pseudogene [Source:HGNC Symbol;Acc:HGNC:13827]	ZNF321P	0.302153	0.731236	1.90937	0.167033	0.873341	Unchanged
ENSG00000242540	lncRNA	novel transcript	AC010729.2	0.313406	0.666765	1.90827	0.167156	0.873622	Unchanged
ENSG00000271871	lncRNA	novel transcript, antisense to PCDH12	AC005740.4	0.752041	-0.867439	1.90497	0.167523	0.873855	Unchanged
ENSG00000276744	lncRNA	novel transcript, sense intronic to SIN3A	AC105137.2	0.665729	-1.31448	1.90574	0.167437	0.873855	Unchanged
ENSG00000255992	lncRNA	novel transcript	AC131009.1	-0.653716	-1.31404	1.90452	0.167573	0.873855	Unchanged
ENSG00000236618	lncRNA	PITPNA antisense RNA 1 [Source:HGNC Symbol;Acc:HGNC:44116]	PITPNA-AS1	0.12269	3.12369	1.90424	0.167604	0.873855	Unchanged
ENSG00000258092	lncRNA	novel transcript, antisense to FKBP4	AC005841.1	-0.59411	-1.31415	1.89873	0.16822	0.874427	Unchanged
ENSG00000273056	lncRNA	novel transcript	AL354694.1	-0.688019	-1.49186	1.90132	0.167931	0.874427	Unchanged
ENSG00000245910	lncRNA	small nucleolar RNA host gene 6 [Source:HGNC Symbol;Acc:HGNC:32965]	SNHG6	0.0695338	5.95607	1.90103	0.167963	0.874427	Unchanged
ENSG00000257781	lncRNA	novel transcript	AC009387.1	-0.924449	-1.49161	1.89673	0.168445	0.874432	Unchanged
ENSG00000258108	lncRNA	novel transcript	AC009803.2	-0.852497	-1.32431	1.89413	0.168737	0.874432	Unchanged
ENSG00000269947	lncRNA	novel transcript	AC135178.6	0.386008	-0.151633	1.8955	0.168582	0.874432	Unchanged
ENSG00000228526	lncRNA	MIR34A host gene [Source:HGNC Symbol;Acc:HGNC:51913]	MIR34AHG	-0.19076	2.18107	1.89245	0.168926	0.874432	Unchanged
ENSG00000234851	processed_pseudogene	ribosomal protein L23a pseudogene 42 [Source:HGNC Symbol;Acc:HGNC:35942]	RPL23AP42	-0.356232	0.112418	1.89643	0.168478	0.874432	Unchanged
ENSG00000234912	lncRNA	small nucleolar RNA host gene 20 [Source:HGNC Symbol;Acc:HGNC:33099]	SNHG20	0.0904847	4.19999	1.89456	0.168688	0.874432	Unchanged
ENSG00000231165	TR_V_pseudogene	T cell receptor beta variable 26/OR9-2 (pseudogene) [Source:HGNC Symbol;Acc:HGNC:15485]	TRBV26OR9-2	-0.280415	0.711971	1.89085	0.169106	0.874432	Unchanged
ENSG00000243403	processed_pseudogene	ribosomal protein S26 (RPS26) pseudogene	AC090543.2	1.09667	-1.61494	1.88591	0.169664	0.874921	Unchanged
ENSG00000251023	lncRNA	novel transcript	AC114980.1	-0.473219	-0.268203	1.88558	0.169702	0.874921	Unchanged
ENSG00000271882	lncRNA	novel transcript	AP001330.4	0.621391	-1.18453	1.88567	0.169691	0.874921	Unchanged
ENSG00000248641	processed_pseudogene	high mobility group AT-hook 1 pseudogene 2 [Source:HGNC Symbol;Acc:HGNC:13322]	HMGA1P2	0.271092	0.959967	1.8856	0.169698	0.874921	Unchanged
ENSG00000200170	misc_RNA	Y RNA [Source:RFAM;Acc:RF00019]	Y_RNA	0.609537	-0.898743	1.88651	0.169597	0.874921	Unchanged
ENSG00000263307	lncRNA	RSL1D1 divergent transcript [Source:HGNC Symbol;Acc:HGNC:55337]	AC007216.4	0.566574	-0.955015	1.8813	0.170186	0.875141	Unchanged
ENSG00000249859	lncRNA	Pvt1 oncogene [Source:HGNC Symbol;Acc:HGNC:9709]	PVT1	0.167623	3.24247	1.88032	0.170298	0.875254	Unchanged
ENSG00000263338	lncRNA	novel transcript, sense intronic to TRPV1	AC027796.5	0.805971	-1.68099	1.87844	0.170512	0.87612	Unchanged
ENSG00000261188	lncRNA	TFIP11 divergent transcript [Source:HGNC Symbol;Acc:HGNC:55374]	Z95115.1	0.119879	3.42545	1.87536	0.170863	0.877018	Unchanged
ENSG00000279464	TEC	tec	AC096720.2	-0.427768	-0.277997	1.87219	0.171225	0.87732	Unchanged
ENSG00000240729	processed_pseudogene	ribosomal protein L21 (RPL21) pseudogene	AC146507.2	-0.520118	-1.03933	1.87182	0.171267	0.87732	Unchanged
ENSG00000224186	lncRNA	chromosome 5 putative open reading frame 66 [Source:HGNC Symbol;Acc:HGNC:48332]	C5orf66	0.617457	-1.10962	1.87059	0.171407	0.87732	Unchanged
ENSG00000268654	lncRNA	MER1 repeat containing imprinted transcript 1 [Source:HGNC Symbol;Acc:HGNC:33464]	MIMT1	0.226269	1.4745	1.8711	0.171349	0.87732	Unchanged
ENSG00000263412	lncRNA	NFE2L1 divergent transcript [Source:HGNC Symbol;Acc:HGNC:54812]	NFE2L1-DT	0.187655	2.40597	1.87048	0.171421	0.87732	Unchanged
ENSG00000260253	lncRNA	novel transcript, overlapping to DUSP4	AC084262.1	-0.512497	-0.750259	1.86576	0.171961	0.877383	Unchanged
ENSG00000255165	lncRNA	novel transcript	AC134775.1	-0.681933	-1.57718	1.86384	0.172183	0.877383	Unchanged
ENSG00000180139	lncRNA	ACTA2 antisense RNA 1 [Source:HGNC Symbol;Acc:HGNC:45169]	ACTA2-AS1	0.481457	-0.546089	1.86534	0.17201	0.877383	Unchanged
ENSG00000287248	lncRNA	novel transcript	AC009271.2	1.06316	-2.11893	1.85994	0.172632	0.877644	Unchanged
ENSG00000260588	lncRNA	novel transcript	AC027702.1	0.734325	-1.70847	1.85573	0.173118	0.877644	Unchanged
ENSG00000285280	lncRNA	novel transcript	AL390957.1	-0.509516	-0.778858	1.85963	0.172668	0.877644	Unchanged
ENSG00000272994	lncRNA	C2orf49 divergent transcript [Source:HGNC Symbol;Acc:HGNC:55178]	C2orf49-DT	0.101345	3.70766	1.85599	0.173088	0.877644	Unchanged
ENSG00000267575	lncRNA	novel transcript	AC006504.5	-0.105498	4.01815	1.83713	0.175288	0.87779	Unchanged
ENSG00000286315	lncRNA	novel transcript	AC087175.1	-0.630788	-1.48035	1.8435	0.174541	0.87779	Unchanged
ENSG00000269951	lncRNA	novel transcript, sense intronic to TSPAN3	AC090181.2	0.172711	2.17401	1.84568	0.174287	0.87779	Unchanged
ENSG00000272076	lncRNA	novel transcript	AC090186.1	-0.607549	-1.17452	1.83295	0.175779	0.87779	Unchanged
ENSG00000259366	lncRNA	novel transcript, sense intronic to HMBOX1	AC108449.2	-0.109546	3.8391	1.82979	0.176153	0.87779	Unchanged
ENSG00000254373	processed_pseudogene	ubiquinol-cytochrome c reductase binding protein (UQCRB) pseudogene	AC112191.2	0.421254	-0.367156	1.8321	0.17588	0.87779	Unchanged
ENSG00000266490	lncRNA	novel transcript	AC127024.5	-0.17251	2.59063	1.84358	0.174532	0.87779	Unchanged
ENSG00000279162	TEC	tec	AC141586.5	-0.496668	-0.722197	1.84497	0.174369	0.87779	Unchanged
ENSG00000232828	lncRNA	novel transcript	AC231533.1	0.791973	-1.7083	1.83069	0.176046	0.87779	Unchanged
ENSG00000254556	lncRNA	novel transcript	AF131215.2	0.469329	0.0890301	1.85001	0.173782	0.87779	Unchanged
ENSG00000260000	lncRNA	novel transcript, antisense to ASCC3	AL133338.1	0.252715	1.01966	1.83513	0.175523	0.87779	Unchanged
ENSG00000283828	lncRNA	novel transcript, antisense to F10	AL137002.2	0.293668	0.495701	1.84436	0.17444	0.87779	Unchanged
ENSG00000255710	processed_pseudogene	interferon stimulated exonuclease gene 20kDa-like 2 (ISG20L2) pseudogene	AP003170.1	-0.260134	0.672404	1.84291	0.174611	0.87779	Unchanged
ENSG00000224786	transcribed_unitary_pseudogene	centrin 4, pseudogene [Source:HGNC Symbol;Acc:HGNC:35450]	CETN4P	-0.449892	-0.485706	1.85414	0.173303	0.87779	Unchanged
ENSG00000229816	processed_pseudogene	DEAD-box helicase 50 pseudogene 1 [Source:HGNC Symbol;Acc:HGNC:18974]	DDX50P1	0.229738	1.18081	1.8391	0.175056	0.87779	Unchanged
ENSG00000225988	lncRNA	LAMP5 antisense RNA 1 [Source:HGNC Symbol;Acc:HGNC:40754]	LAMP5-AS1	-0.553501	-0.90751	1.84154	0.17477	0.87779	Unchanged
ENSG00000281183	lncRNA	NPTN intronic transcript 1 [Source:HGNC Symbol;Acc:HGNC:45091]	NPTN-IT1	-0.16844	2.52984	1.83111	0.175996	0.87779	Unchanged
ENSG00000239884	misc_RNA	RNA, 7SL, cytoplasmic 608, pseudogene [Source:HGNC Symbol;Acc:HGNC:46624]	RN7SL608P	-0.464811	-0.680727	1.84677	0.174159	0.87779	Unchanged
ENSG00000207003	snRNA	RNA, U6 small nuclear 611, pseudogene [Source:HGNC Symbol;Acc:HGNC:47574]	RNU6-611P	0.510751	-0.715369	1.84734	0.174093	0.87779	Unchanged
ENSG00000186056	lncRNA	MATN1 antisense RNA 1 [Source:HGNC Symbol;Acc:HGNC:40364]	MATN1-AS1	0.68638	-1.20341	1.82865	0.176287	0.877873	Unchanged
ENSG00000263006	transcribed_unprocessed_pseudogene	Rho associated coiled-coil containing protein kinase 1 pseudogene 1 [Source:HGNC Symbol;Acc:HGNC:37832]	ROCK1P1	0.375481	-0.0961156	1.82789	0.176377	0.878007	Unchanged
ENSG00000273650	lncRNA	novel transcript	AC100793.4	-0.890366	-1.62793	1.82729	0.176447	0.878136	Unchanged
ENSG00000282978	processed_pseudogene	basic transcription factor 3 (BTF3) pseudogene	AC110994.2	0.637512	-1.34586	1.82639	0.176554	0.878219	Unchanged
ENSG00000229191	lncRNA	novel transcript, antisense KIF21B	AL358473.1	-0.424202	-0.808045	1.82387	0.176853	0.878585	Unchanged
ENSG00000233012	transcribed_processed_pseudogene	histone deacetylase 1 pseudogene 2 [Source:HGNC Symbol;Acc:HGNC:45191]	HDAC1P2	-0.320142	0.139526	1.82462	0.176765	0.878585	Unchanged
ENSG00000274315	lncRNA	novel transcript, antisense to FAR2	AC009318.3	0.69025	-1.05599	1.82307	0.176948	0.878666	Unchanged
ENSG00000283236	transcribed_unprocessed_pseudogene	novel zinc finger protein pseudogene	AC074141.1	-0.210972	1.762	1.82297	0.17696	0.878666	Unchanged
ENSG00000231473	lncRNA	RB1 divergent transcript [Source:HGNC Symbol;Acc:HGNC:42778]	RB1-DT	0.574997	-1.30377	1.81872	0.177465	0.879383	Unchanged
ENSG00000205485	transcribed_unprocessed_pseudogene	pseudogene similar to part of postmeiotic segregation increased 2-like 3 PMS2L3	AC004980.1	-0.134626	3.10717	1.79012	0.180911	0.879851	Unchanged
ENSG00000239246	processed_pseudogene	ribosomal protein S10 (RPS10) pseudogene	AC008026.1	-0.793905	-1.58977	1.78777	0.181198	0.879851	Unchanged
ENSG00000278972	TEC	TEC	AC015920.1	0.523543	-0.0218443	1.81307	0.17814	0.879851	Unchanged
ENSG00000234841	processed_pseudogene	TAF4b RNA polymerase II, TATA box binding protein (TBP)-associated factor, 105kDa (TAF4B) pseudogene	AC017007.2	0.385926	0.260574	1.79137	0.180759	0.879851	Unchanged
ENSG00000269954	lncRNA	novel transcript, antisense to BLK	AC022239.1	0.140774	3.87017	1.78402	0.181656	0.879851	Unchanged
ENSG00000268747	processed_pseudogene	COX16 cytochrome c oxidase assembly homolog (S. cerevisiae) (COX16) pseudogene	AC022432.1	0.889043	-1.72192	1.795	0.180318	0.879851	Unchanged
ENSG00000259377	lncRNA	novel transcript, intronic to TMOD2	AC026770.1	0.654776	-1.2935	1.79965	0.179755	0.879851	Unchanged
ENSG00000272024	lncRNA	novel transcript	AC064807.4	-0.464637	-0.608935	1.80556	0.179041	0.879851	Unchanged
ENSG00000270130	lncRNA	novel transcript, sense intronic to CCDC92	AC068790.7	-0.272636	0.915253	1.81245	0.178215	0.879851	Unchanged
ENSG00000279086	TEC	TEC	AC073130.3	0.785628	-1.65455	1.787	0.181293	0.879851	Unchanged
ENSG00000269984	lncRNA	novel transcript, antisense to MYNN	AC078795.1	-0.210664	1.85493	1.80023	0.179684	0.879851	Unchanged
ENSG00000253553	lncRNA	novel transcript, antisense to MMP16	AC090578.1	0.193922	1.83046	1.78461	0.181584	0.879851	Unchanged
ENSG00000254400	lncRNA	novel transcript	AC091564.2	-0.587623	-1.4116	1.79828	0.179921	0.879851	Unchanged
ENSG00000237838	lncRNA	novel transcript	AC092422.1	0.879765	-1.82243	1.80047	0.179656	0.879851	Unchanged
ENSG00000270194	lncRNA	GOLGA4 antisense RNA 1 [Source:HGNC Symbol;Acc:HGNC:26469]	AC097359.2	0.39743	-0.378823	1.81495	0.177915	0.879851	Unchanged
ENSG00000258081	lncRNA	novel transcript	AL110292.1	-0.363969	0.0651169	1.81381	0.178051	0.879851	Unchanged
ENSG00000218631	processed_pseudogene	novel pseudogene	AL117344.1	0.421255	-0.688588	1.78977	0.180955	0.879851	Unchanged
ENSG00000272848	lncRNA	novel transcript	AL135910.1	-0.310264	0.635885	1.78413	0.181643	0.879851	Unchanged
ENSG00000225721	lncRNA	novel transcript	AL592166.1	-0.246374	1.98582	1.80358	0.17928	0.879851	Unchanged
ENSG00000225579	lncRNA	EDNRB antisense RNA 1 [Source:HGNC Symbol;Acc:HGNC:49045]	EDNRB-AS1	-0.413285	-0.457053	1.79684	0.180095	0.879851	Unchanged
ENSG00000215093	processed_pseudogene	eukaryotic translation elongation factor 1 alpha 1 pseudogene 29 [Source:HGNC Symbol;Acc:HGNC:37904]	EEF1A1P29	-0.608829	-1.44553	1.81503	0.177906	0.879851	Unchanged
ENSG00000230870	processed_pseudogene	F-box and WD repeat domain containing 11 pseudogene 1 [Source:HGNC Symbol;Acc:HGNC:1145]	FBXW11P1	-0.456763	-0.462258	1.79645	0.180143	0.879851	Unchanged
ENSG00000229835	processed_pseudogene	KH-type splicing regulatory protein pseudogene 1 [Source:HGNC Symbol;Acc:HGNC:39198]	KHSRPP1	0.71923	-1.64143	1.80624	0.17896	0.879851	Unchanged
ENSG00000243083	lncRNA	long intergenic non-protein coding RNA 870 [Source:HGNC Symbol;Acc:HGNC:27319]	LINC00870	0.590743	-0.947371	1.78903	0.181044	0.879851	Unchanged
ENSG00000242268	lncRNA	long intergenic non-protein coding RNA 2082 [Source:HGNC Symbol;Acc:HGNC:52931]	LINC02082	-0.56992	-1.10988	1.79944	0.17978	0.879851	Unchanged
ENSG00000272894	lncRNA	MIOS divergent transcript [Source:HGNC Symbol;Acc:HGNC:55187]	MIOS-DT	0.217162	1.18642	1.80365	0.179272	0.879851	Unchanged
ENSG00000277452	misc_RNA	RNA, 7SL, cytoplasmic 473, pseudogene [Source:HGNC Symbol;Acc:HGNC:46489]	RN7SL473P	0.577246	-1.35669	1.78392	0.181669	0.879851	Unchanged
ENSG00000212802	processed_pseudogene	ribosomal protein L15 pseudogene 3 [Source:HGNC Symbol;Acc:HGNC:21538]	RPL15P3	-0.285098	0.74083	1.80747	0.178812	0.879851	Unchanged
ENSG00000238961	snoRNA	small nucleolar RNA, H/ACA box 47 [Source:HGNC Symbol;Acc:HGNC:32640]	SNORA47	0.784398	-1.73605	1.80144	0.179539	0.879851	Unchanged
ENSG00000230665	processed_pseudogene	THAP domain containing 12 pseudogene 1 [Source:HGNC Symbol;Acc:HGNC:39563]	THAP12P1	-0.442723	-0.674299	1.80215	0.179452	0.879851	Unchanged
ENSG00000249459	transcribed_unprocessed_pseudogene	zinc finger protein 286B (pseudogene) [Source:HGNC Symbol;Acc:HGNC:33241]	ZNF286B	-0.133852	3.17437	1.78677	0.181321	0.879851	Unchanged
ENSG00000267500	transcribed_unprocessed_pseudogene	zinc finger protein 887, pseudogene [Source:HGNC Symbol;Acc:HGNC:38700]	ZNF887P	-0.148208	2.47983	1.79946	0.179778	0.879851	Unchanged
ENSG00000241532	processed_pseudogene	angiogenic factor with G-patch and FHA domains 1 pseudogene 3 [Source:HGNC Symbol;Acc:HGNC:38053]	AGGF1P3	-0.297255	0.508067	1.78338	0.181734	0.879948	Unchanged
ENSG00000272836	lncRNA	novel transcript, antisense to SELO	AL022328.1	0.715837	-1.45701	1.77936	0.182228	0.879988	Unchanged
ENSG00000230555	lncRNA	novel transcript	AL450326.1	-0.433718	-0.056202	1.78283	0.181803	0.879988	Unchanged
ENSG00000242876	misc_RNA	RNA, 7SL, cytoplasmic 812, pseudogene [Source:HGNC Symbol;Acc:HGNC:46828]	RN7SL812P	-0.592824	-1.21277	1.77859	0.182323	0.879988	Unchanged
ENSG00000227598	lncRNA	novel transcript	Z94721.1	-0.309123	0.381687	1.77989	0.182163	0.879988	Unchanged
ENSG00000274925	lncRNA	ZKSCAN2 divergent transcript [Source:HGNC Symbol;Acc:HGNC:53912]	ZKSCAN2-DT	0.158513	2.57407	1.78101	0.182026	0.879988	Unchanged
ENSG00000279865	TEC	TEC	AC006511.3	-0.596715	-0.868042	1.77637	0.182596	0.88001	Unchanged
ENSG00000271401	lncRNA	novel transcript	AC010680.5	0.516536	-1.07434	1.77528	0.18273	0.88001	Unchanged
ENSG00000283757	lncRNA	novel transcript	AL031686.1	0.270688	0.78691	1.77488	0.182779	0.88001	Unchanged
ENSG00000288044	lncRNA	novel transcript, antisense to RABGGTAand DHRS1	AL096870.8	0.396554	0.0449946	1.7767	0.182555	0.88001	Unchanged
ENSG00000260954	lncRNA	novel transcript, intronic to IFT140	AL133297.1	0.749323	-1.6678	1.77618	0.182619	0.88001	Unchanged
ENSG00000272008	lncRNA	novel transcript, antisense to ZNF292	AL139274.2	0.293105	0.252822	1.77602	0.182639	0.88001	Unchanged
ENSG00000283929	miRNA	microRNA 5010 [Source:HGNC Symbol;Acc:HGNC:43484]	MIR5010	0.720395	-1.55221	1.77336	0.182967	0.88001	Unchanged
ENSG00000253245	processed_pseudogene	MT-ND1 pseudogene 36 [Source:HGNC Symbol;Acc:HGNC:42086]	MTND1P36	-0.278215	0.553215	1.77478	0.182791	0.88001	Unchanged
ENSG00000213590	processed_pseudogene	ribosomal protein L30 (RPL30) pseudogene	AL807752.1	0.830353	-1.77886	1.77275	0.183043	0.880137	Unchanged
ENSG00000241180	lncRNA	novel transcript	AL645608.4	-0.366893	0.54964	1.76986	0.183399	0.881221	Unchanged
ENSG00000234286	lncRNA	novel transcript	AC006026.3	-0.3652	0.169924	1.76462	0.184049	0.881555	Unchanged
ENSG00000285667	lncRNA	novel transcript	AC012291.3	0.467346	-0.141704	1.7633	0.184214	0.881555	Unchanged
ENSG00000254340	lncRNA	novel transcript	AC022784.5	0.894748	-1.17458	1.76319	0.184228	0.881555	Unchanged
ENSG00000253704	lncRNA	novel transcript	AC023632.2	0.382851	0.177127	1.76443	0.184073	0.881555	Unchanged
ENSG00000274227	lncRNA	novel transcript, antisense to ERP29	AC073575.2	-0.509573	-0.576965	1.7687	0.183543	0.881555	Unchanged
ENSG00000230424	lncRNA	EMC1 antisense RNA 1 [Source:HGNC Symbol;Acc:HGNC:54050]	EMC1-AS1	0.454802	-0.615622	1.7628	0.184275	0.881555	Unchanged
ENSG00000263327	lncRNA	TAPT1 antisense RNA 1 (head to head) [Source:HGNC Symbol;Acc:HGNC:26832]	TAPT1-AS1	-0.211649	1.4205	1.76688	0.183769	0.881555	Unchanged
ENSG00000288612	lncRNA	novel transcript	AL133351.4	-0.423703	0.204008	1.76199	0.184376	0.881599	Unchanged
ENSG00000222017	lncRNA	novel transcript, antisense to BOLL	AC011997.1	-0.674733	-1.68124	1.75858	0.184802	0.882303	Unchanged
ENSG00000275839	processed_pseudogene	ribosomal protein L24 (RPL24) pseudogene	AC243654.2	0.6795	-1.3141	1.7579	0.184886	0.882388	Unchanged
ENSG00000280388	TEC	TEC	AC006330.1	0.298609	1.37863	1.74712	0.186239	0.882557	Unchanged
ENSG00000213414	processed_pseudogene	cell division cycle 37 homolog (S. cerevisiae) (CDC37 ) pseudogene	AC008677.1	0.596219	-1.44557	1.74724	0.186224	0.882557	Unchanged
ENSG00000224536	lncRNA	novel transcript	AC096677.1	0.45146	-0.314135	1.74696	0.18626	0.882557	Unchanged
ENSG00000238260	lncRNA	novel transcript	AL513320.1	0.596208	-1.28311	1.74718	0.186232	0.882557	Unchanged
ENSG00000228126	lncRNA	focally amplified long non-coding RNA in epithelial cancer [Source:HGNC Symbol;Acc:HGNC:43713]	FALEC	0.494193	-0.778825	1.74987	0.185893	0.882557	Unchanged
ENSG00000221792	miRNA	microRNA 1282 [Source:HGNC Symbol;Acc:HGNC:35360]	MIR1282	0.573047	-1.14661	1.74903	0.185999	0.882557	Unchanged
ENSG00000273344	lncRNA	PAXIP1 divergent transcript [Source:HGNC Symbol;Acc:HGNC:27328]	PAXIP1-DT	0.124173	3.09698	1.75324	0.185469	0.882557	Unchanged
ENSG00000202347	snRNA	RNA, U1 small nuclear 16, pseudogene [Source:HGNC Symbol;Acc:HGNC:39890]	RNU1-16P	0.494232	-1.12814	1.75014	0.185859	0.882557	Unchanged
ENSG00000273271	lncRNA	novel transcript, antisense to SOD1	AP000254.2	-0.238714	1.2425	1.74228	0.186851	0.883734	Unchanged
ENSG00000237080	lncRNA	EHMT2 and SLC44A4 antisense RNA 1 [Source:HGNC Symbol;Acc:HGNC:39751]	EHMT2-AS1	-0.773394	-1.52771	1.74162	0.186934	0.88382	Unchanged
ENSG00000279594	TEC	TEC	AL049780.3	0.444126	-0.521924	1.74068	0.187052	0.883912	Unchanged
ENSG00000280739	lncRNA	EIF1B antisense RNA 1 [Source:HGNC Symbol;Acc:HGNC:44555]	EIF1B-AS1	0.56476	-0.899339	1.7399	0.187151	0.883988	Unchanged
ENSG00000260751	lncRNA	novel transcript	AC008870.2	0.224724	1.29269	1.73178	0.188184	0.884048	Unchanged
ENSG00000272479	lncRNA	novel transcript	AC010857.1	-0.628467	-1.83779	1.73014	0.188393	0.884048	Unchanged
ENSG00000267546	lncRNA	novel transcript, antisense to PRCD	AC015802.4	0.808201	-1.32416	1.73411	0.187887	0.884048	Unchanged
ENSG00000241754	lncRNA	novel transcript	AC063938.1	0.79757	-1.60245	1.72873	0.188573	0.884048	Unchanged
ENSG00000262663	lncRNA	novel transcript, sense intronic TBCD	AC087222.1	0.316374	0.643187	1.72954	0.18847	0.884048	Unchanged
ENSG00000272906	lncRNA	novel transcript, antisense to TOR1AIP1	AL353708.3	-0.479275	-0.729192	1.73248	0.188094	0.884048	Unchanged
ENSG00000270604	lncRNA	HLA complex group 17 [Source:HGNC Symbol;Acc:HGNC:31339]	HCG17	-0.36748	0.20356	1.72871	0.188576	0.884048	Unchanged
ENSG00000233325	transcribed_unprocessed_pseudogene	mitochondrial intermediate peptidase pseudogene 3 [Source:HGNC Symbol;Acc:HGNC:39458]	MIPEPP3	0.328179	0.100652	1.73802	0.18739	0.884048	Unchanged
ENSG00000255306	lncRNA	novel transcript	AC004923.4	0.419264	-0.361867	1.72664	0.188841	0.88433	Unchanged
ENSG00000225972	unprocessed_pseudogene	MT-ND1 pseudogene 23 [Source:HGNC Symbol;Acc:HGNC:42092]	MTND1P23	-0.289674	0.971771	1.72651	0.188857	0.88433	Unchanged
ENSG00000250318	unprocessed_pseudogene	ribosomal protein L13a (RPL13A) pseudogene	AC003072.1	-0.413727	-0.109438	1.7185	0.189886	0.884529	Unchanged
ENSG00000286707	lncRNA	novel transcript	AC010896.1	-0.804917	-1.53983	1.71796	0.189956	0.884529	Unchanged
ENSG00000274292	lncRNA	novel transcript	AC084018.2	0.512525	-0.492098	1.71695	0.190086	0.884529	Unchanged
ENSG00000286863	lncRNA	novel transcript	AL513166.1	0.461353	-0.621809	1.7254	0.188999	0.884529	Unchanged
ENSG00000228404	lncRNA	novel transcript	AP001468.1	0.720545	-1.88377	1.72037	0.189645	0.884529	Unchanged
ENSG00000259462	lncRNA	CPEB1 antisense RNA 1 [Source:HGNC Symbol;Acc:HGNC:27523]	CPEB1-AS1	-0.474993	-0.808456	1.71486	0.190356	0.884529	Unchanged
ENSG00000239335	lncRNA	LLPH divergent transcript [Source:HGNC Symbol;Acc:HGNC:50493]	LLPH-DT	0.448654	-0.288154	1.72376	0.18921	0.884529	Unchanged
ENSG00000214548	lncRNA	maternally expressed 3 [Source:HGNC Symbol;Acc:HGNC:14575]	MEG3	0.720696	-1.83804	1.71642	0.190154	0.884529	Unchanged
ENSG00000204387	lncRNA	small nucleolar RNA host gene 32 [Source:HGNC Symbol;Acc:HGNC:19078]	SNHG32	0.0916757	3.85829	1.71577	0.190239	0.884529	Unchanged
ENSG00000185332	lncRNA	TMEM105 long non-coding RNA [Source:HGNC Symbol;Acc:HGNC:26794]	TMEM105	0.59684	-1.75034	1.72009	0.189682	0.884529	Unchanged
ENSG00000228775	lncRNA	WEE2 antisense RNA 1 [Source:HGNC Symbol;Acc:HGNC:48669]	WEE2-AS1	0.13452	2.9943	1.71753	0.190011	0.884529	Unchanged
ENSG00000279529	lncRNA	novel transcript, antisense to MED26	AC008764.8	0.192646	1.76407	1.71108	0.190846	0.885138	Unchanged
ENSG00000259343	lncRNA	TMC3 antisense RNA 1 [Source:HGNC Symbol;Acc:HGNC:51424]	TMC3-AS1	-0.223132	1.83338	1.71037	0.190938	0.885349	Unchanged
ENSG00000234715	lncRNA	novel transcript, antisense to RELN and SLC26A5	AC005064.1	-0.667481	-1.51568	1.70208	0.192016	0.885784	Unchanged
ENSG00000284624	lncRNA	novel transcript	AC092902.4	0.787761	-1.52744	1.69883	0.192441	0.885784	Unchanged
ENSG00000270171	lncRNA	novel transcript	AL359881.3	0.399634	-0.390289	1.70705	0.191369	0.885784	Unchanged
ENSG00000283913	lncRNA	novel transcript	AL512662.1	0.891267	-1.73586	1.69901	0.192417	0.885784	Unchanged
ENSG00000274428	snRNA	RNA, variant U1 small nuclear 25 [Source:HGNC Symbol;Acc:HGNC:54428]	RNVU1-25	0.726371	-1.6813	1.70279	0.191923	0.885784	Unchanged
ENSG00000224442	processed_pseudogene	ribosomal protein L4 pseudogene 7 [Source:HGNC Symbol;Acc:HGNC:54598]	RPL4P7	0.470772	-0.48043	1.70032	0.192246	0.885784	Unchanged
ENSG00000267750	lncRNA	RUNDC3A antisense RNA 1 [Source:HGNC Symbol;Acc:HGNC:51344]	RUNDC3A-AS1	0.274143	0.716522	1.69887	0.192436	0.885784	Unchanged
ENSG00000233452	lncRNA	STXBP5 antisense RNA 1 [Source:HGNC Symbol;Acc:HGNC:44183]	STXBP5-AS1	-0.507197	-0.687986	1.70365	0.191812	0.885784	Unchanged
ENSG00000259291	lncRNA	ZNF710 antisense RNA 1 [Source:HGNC Symbol;Acc:HGNC:53141]	ZNF710-AS1	0.096219	4.4511	1.70225	0.191994	0.885784	Unchanged
ENSG00000267216	lncRNA	ZNF8-ERVK3-1 readthrough [Source:NCBI gene (formerly Entrezgene);Acc:108903150]	ZNF8-ERVK3-1	0.292334	0.599261	1.70246	0.191967	0.885784	Unchanged
ENSG00000276384	lncRNA	novel transcript, antisense to TNFSF12	AC016876.3	0.783414	-1.57679	1.69417	0.193052	0.886286	Unchanged
ENSG00000252427	snoRNA		AC115088.1	0.809903	-1.77912	1.69435	0.193028	0.886286	Unchanged
ENSG00000213250	processed_pseudogene	RNA binding motif single stranded interacting protein 2 pseudogene 1 [Source:HGNC Symbol;Acc:HGNC:30994]	RBMS2P1	-0.667658	-1.5276	1.68973	0.193636	0.887171	Unchanged
ENSG00000253541	processed_pseudogene	septin 10 pseudogene 1 [Source:HGNC Symbol;Acc:HGNC:40018]	SEPTIN10P1	-0.584309	-1.2033	1.68857	0.19379	0.887171	Unchanged
ENSG00000287574	lncRNA	novel transcript	AC004938.2	-0.31111	0.217184	1.68653	0.194059	0.887491	Unchanged
ENSG00000267904	lncRNA	novel transcript, sense intronic C19orf42	AC024075.1	0.1594	2.23882	1.68459	0.194315	0.887491	Unchanged
ENSG00000258744	lncRNA	novel transcript, antisense to CMA1	AL132800.1	-0.185371	1.80168	1.68604	0.194124	0.887491	Unchanged
ENSG00000228506	lncRNA	novel transcript	AL513550.1	0.1198	2.87411	1.68489	0.194277	0.887491	Unchanged
ENSG00000256616	transcribed_processed_pseudogene	G protein-coupled receptor 125 (GPR125) pseudogene	AP002414.2	0.236599	1.36633	1.68591	0.194142	0.887491	Unchanged
ENSG00000223508	transcribed_processed_pseudogene	ribosomal protein L23a pseudogene 53 [Source:HGNC Symbol;Acc:HGNC:35921]	RPL23AP53	0.20676	1.85873	1.68412	0.194378	0.887565	Unchanged
ENSG00000271259	lncRNA	novel transcript	AC010201.1	-0.343964	-0.0741922	1.68305	0.194519	0.887673	Unchanged
ENSG00000213711	processed_pseudogene	prohibitin pseudogene 7 [Source:HGNC Symbol;Acc:HGNC:39286]	PHBP7	-0.637649	-1.29332	1.68292	0.194537	0.887673	Unchanged
ENSG00000242479	processed_pseudogene	eukaryotic translation initiation factor 2-alpha kinase 1 (EIF2AK1) pseudogene	AC109992.1	0.623253	-1.45692	1.68163	0.194708	0.887734	Unchanged
ENSG00000221500	snoRNA	small nucleolar RNA, C/D box 100 [Source:HGNC Symbol;Acc:HGNC:32763]	SNORD100	0.866725	-1.85286	1.68157	0.194716	0.887734	Unchanged
ENSG00000177173	processed_pseudogene	nucleosome assembly protein 1 like 4 pseudogene 1 [Source:HGNC Symbol;Acc:HGNC:39740]	NAP1L4P1	0.442647	-0.558642	1.68002	0.194922	0.88818	Unchanged
ENSG00000273014	lncRNA	novel transcript	AC018645.3	-0.183949	1.9158	1.67288	0.195874	0.888776	Unchanged
ENSG00000269924	lncRNA	novel transcript, sense intronic to KIAA0146	AC024451.4	0.675037	-1.37811	1.67386	0.195743	0.888776	Unchanged
ENSG00000259314	lncRNA	novel transcript, antisense to CRTC3	AC103739.2	-0.624288	-1.49178	1.67348	0.195794	0.888776	Unchanged
ENSG00000170161	lncRNA	novel transcript	AL512625.1	0.220673	1.13159	1.67455	0.19565	0.888776	Unchanged
ENSG00000143429	transcribed_unprocessed_pseudogene	LSP1 pseudogene 4 [Source:HGNC Symbol;Acc:HGNC:53915]	LSP1P4	-0.311006	0.309032	1.6748	0.195617	0.888776	Unchanged
ENSG00000273001	lncRNA	PFKP divergent transcript [Source:HGNC Symbol;Acc:HGNC:55177]	PFKP-DT	0.503986	-1.27305	1.67101	0.196123	0.889323	Unchanged
ENSG00000274769	lncRNA	novel transcript	AC016747.4	-0.673983	-1.34552	1.668	0.196527	0.890495	Unchanged
ENSG00000278727	lncRNA	novel transcript	AC000403.1	-0.367896	-0.193963	1.66144	0.197409	0.89065	Unchanged
ENSG00000280486	lncRNA	novel transcript, antisense to NDUFS7	AC005329.3	-0.745076	-1.79331	1.65102	0.198821	0.89065	Unchanged
ENSG00000264558	lncRNA	novel transcript, antisense to KPNB1	AC015674.1	-0.570729	-1.26258	1.64865	0.199143	0.89065	Unchanged
ENSG00000269938	lncRNA	novel transcript, sense intronic to CCDC92	AC068790.2	0.247083	1.25301	1.65391	0.198427	0.89065	Unchanged
ENSG00000224593	transcribed_processed_pseudogene	ribosomal protein L21 (RPL21) pseudogene	AC092427.1	0.391767	0.654609	1.65778	0.197904	0.89065	Unchanged
ENSG00000180015	processed_pseudogene	mitochondrial translational release factor 1-like (MTRF1L) pseudogene	AC093909.1	0.372144	-0.0605402	1.64778	0.199261	0.89065	Unchanged
ENSG00000273682	processed_pseudogene	biliverdin reductase B (flavin reductase (NADPH) (BLVRB) pseudogene	AC109583.3	0.741144	-1.99665	1.6602	0.197576	0.89065	Unchanged
ENSG00000278861	TEC	novel transcript	AC117503.2	0.381134	0.384529	1.66242	0.197277	0.89065	Unchanged
ENSG00000259775	lncRNA	novel transcript, antisense to EIF5	AL138976.2	0.397762	-0.19468	1.66365	0.197111	0.89065	Unchanged
ENSG00000220472	processed_pseudogene	ribosomal protein S3 (RPS3) pseudogene	AL139095.2	0.3795	-0.146467	1.66143	0.197411	0.89065	Unchanged
ENSG00000231563	lncRNA	novel transcript	AL139288.1	0.430354	-0.030356	1.65892	0.19775	0.89065	Unchanged
ENSG00000229661	processed_pseudogene	BUD31 homolog pseudogene 2 [Source:HGNC Symbol;Acc:HGNC:51562]	BUD31P2	0.717379	-1.91496	1.66046	0.197541	0.89065	Unchanged
ENSG00000256079	processed_pseudogene	family with sequence similarity 133 member G, pseudogene [Source:HGNC Symbol;Acc:HGNC:54731]	FAM133GP	0.73513	-1.55246	1.6653	0.196889	0.89065	Unchanged
ENSG00000228223	lncRNA	HLA complex group 11 [Source:HGNC Symbol;Acc:HGNC:17707]	HCG11	1.02048	-1.96282	1.66552	0.196859	0.89065	Unchanged
ENSG00000233058	lncRNA	long intergenic non-protein coding RNA 884 [Source:HGNC Symbol;Acc:HGNC:48570]	LINC00884	0.153987	2.51842	1.6602	0.197577	0.89065	Unchanged
ENSG00000226029	lncRNA	long intergenic non-protein coding RNA 1772 [Source:HGNC Symbol;Acc:HGNC:52562]	LINC01772	-0.32634	0.434767	1.65981	0.197629	0.89065	Unchanged
ENSG00000273356	lncRNA	long intergenic non-protein coding RNA 2019 [Source:HGNC Symbol;Acc:HGNC:52854]	LINC02019	0.47188	-0.771531	1.6502	0.198932	0.89065	Unchanged
ENSG00000275131	transcribed_unprocessed_pseudogene	PDE4DIP pseudogene 2 [Source:HGNC Symbol;Acc:HGNC:55081]	PDE4DIPP2	-0.161836	2.48514	1.64993	0.198969	0.89065	Unchanged
ENSG00000139239	processed_pseudogene	ribosomal protein L14 pseudogene 1 [Source:HGNC Symbol;Acc:HGNC:31384]	RPL14P1	0.159457	2.30136	1.65643	0.198087	0.89065	Unchanged
ENSG00000241511	processed_pseudogene	ribosomal protein S15a pseudogene 24 [Source:HGNC Symbol;Acc:HGNC:36174]	RPS15AP24	-0.575592	-1.09126	1.65558	0.198201	0.89065	Unchanged
ENSG00000261183	lncRNA	SPINT1 antisense RNA 1 [Source:HGNC Symbol;Acc:HGNC:53162]	SPINT1-AS1	-0.731764	-1.64109	1.65953	0.197667	0.89065	Unchanged
ENSG00000238057	lncRNA	ZEB2 antisense RNA 1 [Source:HGNC Symbol;Acc:HGNC:37149]	ZEB2-AS1	-0.426597	-0.907273	1.66112	0.197452	0.89065	Unchanged
ENSG00000235944	transcribed_unprocessed_pseudogene	zinc finger protein 815, pseudogene [Source:HGNC Symbol;Acc:HGNC:22029]	ZNF815P	-0.154259	2.49585	1.65207	0.198677	0.89065	Unchanged
ENSG00000279583	TEC	novel transcript	AC009086.2	0.679443	-1.41137	1.64058	0.200246	0.890671	Unchanged
ENSG00000230979	processed_pseudogene	ribosomal protein L18a (RPL18A) pseudogene	AC079250.1	0.796809	-1.70814	1.63918	0.200438	0.890671	Unchanged
ENSG00000273108	lncRNA	novel transcript, antisense to SH3PXD2A	AL121929.2	-0.173921	1.89704	1.64021	0.200297	0.890671	Unchanged
ENSG00000283709	transcribed_unprocessed_pseudogene	family with sequence similarity 238 member C [Source:HGNC Symbol;Acc:HGNC:24672]	FAM238C	0.571321	-0.361288	1.64298	0.199917	0.890671	Unchanged
ENSG00000261366	lncRNA	MANEA divergent transcript [Source:HGNC Symbol;Acc:HGNC:43732]	MANEA-DT	0.254878	1.03738	1.63917	0.200439	0.890671	Unchanged
ENSG00000206612	snoRNA	small nucleolar RNA, H/ACA box 2A [Source:HGNC Symbol;Acc:HGNC:32584]	SNORA2A	0.630241	-1.56469	1.63935	0.200415	0.890671	Unchanged
ENSG00000236472	lncRNA	novel transcript, antisense to PPP1R9B	AC002401.1	-0.696351	-1.55224	1.63749	0.200671	0.89087	Unchanged
ENSG00000280353	TEC	TEC	AC011466.4	0.414625	-0.416692	1.63801	0.200598	0.89087	Unchanged
ENSG00000260805	lncRNA	novel transcript	AC092803.1	0.194274	1.69829	1.6347	0.201054	0.891358	Unchanged
ENSG00000226696	lncRNA	LENG8 antisense RNA 1 [Source:HGNC Symbol;Acc:HGNC:40705]	LENG8-AS1	0.171314	2.04224	1.63505	0.201006	0.891358	Unchanged
ENSG00000273300	lncRNA	novel transcript, antisense to UFD1L	AC000068.3	0.506167	-0.963339	1.63068	0.201609	0.891614	Unchanged
ENSG00000226849	lncRNA	novel transcript	AL109811.1	-0.259325	1.01993	1.63163	0.201478	0.891614	Unchanged
ENSG00000254510	lncRNA	novel transcript	AP001107.5	0.371464	0.124949	1.63024	0.20167	0.891614	Unchanged
ENSG00000235043	processed_pseudogene	trans-2,3-enoyl-CoA reductase pseudogene 1 [Source:HGNC Symbol;Acc:HGNC:44050]	TECRP1	-0.7025	-1.68096	1.62741	0.202062	0.892402	Unchanged
ENSG00000236662	lncRNA	novel transcript, antisense to SEMA4G	AL133215.1	0.339158	0.321448	1.6262	0.202229	0.892464	Unchanged
ENSG00000262533	lncRNA	novel transcript, antisense to DPH1 and OVCA2	AC090617.3	0.560666	-1.35668	1.62462	0.202448	0.892596	Unchanged
ENSG00000180764	transcribed_processed_pseudogene	PIP5K1A and PSMD4 like (pseudogene) [Source:HGNC Symbol;Acc:HGNC:23733]	PIPSL	-0.291266	0.643671	1.62508	0.202386	0.892596	Unchanged
ENSG00000282057	lncRNA	novel transcript	AC092807.3	-0.703501	-1.6948	1.62234	0.202766	0.893031	Unchanged
ENSG00000248546	processed_pseudogene	acidic nuclear phosphoprotein 32 family member C [Source:HGNC Symbol;Acc:HGNC:16675]	ANP32C	-0.55462	-1.10045	1.61885	0.203252	0.893582	Unchanged
ENSG00000204253	processed_pseudogene	heterogeneous nuclear ribonucleoprotein C pseudogene 2 [Source:HGNC Symbol;Acc:HGNC:48814]	HNRNPCP2	0.310115	0.294975	1.61884	0.203254	0.893582	Unchanged
ENSG00000224232	processed_pseudogene	KCTD5 pseudogene 1 [Source:HGNC Symbol;Acc:HGNC:54736]	KCTD5P1	-0.744383	-1.69454	1.6187	0.203273	0.893582	Unchanged
ENSG00000276115	lncRNA	novel transcript, sense intronic to BICD1	AC026356.2	-0.164637	2.12132	1.61553	0.203716	0.893965	Unchanged
ENSG00000260924	lncRNA	long intergenic non-protein coding RNA 1311 [Source:HGNC Symbol;Acc:HGNC:50503]	LINC01311	0.266879	0.719198	1.61568	0.203695	0.893965	Unchanged
ENSG00000207359	snRNA	RNA, U6 small nuclear 925, pseudogene [Source:HGNC Symbol;Acc:HGNC:47888]	RNU6-925P	0.718245	-1.97966	1.61318	0.204046	0.894555	Unchanged
ENSG00000272918	lncRNA	novel transcript, antisense to MLL5	AC005070.3	-0.175669	1.83474	1.61111	0.204336	0.894806	Unchanged
ENSG00000277200	lncRNA	novel transcript	AC005696.4	-0.090012	4.23088	1.60352	0.205406	0.894806	Unchanged
ENSG00000269374	processed_pseudogene	zinc finger, AN1-type domain 5 (ZFAND5) pseudogene	AC011497.2	-0.383425	0.181054	1.59028	0.207286	0.894806	Unchanged
ENSG00000267169	lncRNA	ADGRL1 antisense RNA 1 [Source:HGNC Symbol;Acc:HGNC:55309]	AC022098.1	0.241436	0.832091	1.59207	0.20703	0.894806	Unchanged
ENSG00000270175	lncRNA	novel transcript, antisense to TARBP2	AC023509.3	0.317508	0.0237897	1.5962	0.206443	0.894806	Unchanged
ENSG00000253945	processed_pseudogene	ribosomal protein L36a-like (RPL36AL) pseudogene	AC024995.1	0.658367	-1.60249	1.59159	0.2071	0.894806	Unchanged
ENSG00000231359	processed_pseudogene	ribosomal protein L31 (RPL31) pseudogene	AC072052.1	0.609248	-1.23289	1.60049	0.205833	0.894806	Unchanged
ENSG00000274444	lncRNA	novel transcript	AC078909.2	0.182674	1.52194	1.61154	0.204276	0.894806	Unchanged
ENSG00000279589	TEC	novel transcript	AC079416.3	0.502049	-1.03068	1.59761	0.206242	0.894806	Unchanged
ENSG00000280119	TEC	TEC	AC093642.2	-0.170535	2.25479	1.59418	0.20673	0.894806	Unchanged
ENSG00000249771	lncRNA	novel transcript	AC108210.1	0.546763	-1.1558	1.60872	0.204671	0.894806	Unchanged
ENSG00000225806	lncRNA	novel transcript, antisense to GNAS	AL121917.1	0.274648	0.581887	1.6047	0.205238	0.894806	Unchanged
ENSG00000219928	processed_pseudogene	ribosomal protein S29 (RPS29) pseudogene	AL161787.1	0.316757	0.973844	1.59416	0.206733	0.894806	Unchanged
ENSG00000132967	transcribed_processed_pseudogene	high mobility group box 1 pseudogene 5 [Source:HGNC Symbol;Acc:HGNC:4997]	HMGB1P5	0.237433	1.21236	1.59303	0.206894	0.894806	Unchanged
ENSG00000281332	lncRNA	long intergenic non-protein coding RNA 997 [Source:HGNC Symbol;Acc:HGNC:48952]	LINC00997	-0.138003	3.01061	1.60201	0.205618	0.894806	Unchanged
ENSG00000284693	lncRNA	long intergenic non-protein coding RNA 2606 [Source:HGNC Symbol;Acc:HGNC:54047]	LINC02606	0.270292	0.387556	1.60678	0.204945	0.894806	Unchanged
ENSG00000228412	lncRNA	lncRNA bladder and prostate cancer suppressor, hnRNPK interacting [Source:HGNC Symbol;Acc:HGNC:54418]	LNC-LBCS	-0.402621	-0.383733	1.58987	0.207344	0.894806	Unchanged
ENSG00000274602	transcribed_unprocessed_pseudogene	phosphatidylinositol 4-kinase alpha pseudogene 1 [Source:HGNC Symbol;Acc:HGNC:33576]	PI4KAP1	0.136266	3.1339	1.58995	0.207333	0.894806	Unchanged
ENSG00000199804	rRNA_pseudogene	RNA, 5S ribosomal pseudogene 383 [Source:HGNC Symbol;Acc:HGNC:43283]	RNA5SP383	-0.500875	-0.95494	1.59956	0.205965	0.894806	Unchanged
ENSG00000224315	processed_pseudogene	ribosomal protein L7 pseudogene 7 [Source:HGNC Symbol;Acc:HGNC:36895]	RPL7P7	-0.485566	-0.77158	1.58982	0.207352	0.894806	Unchanged
ENSG00000204791	transcribed_unitary_pseudogene	sphingomyelin phosphodiesterase 5 (pseudogene) [Source:HGNC Symbol;Acc:HGNC:52275]	SMPD5	0.239182	1.41691	1.60711	0.204899	0.894806	Unchanged
ENSG00000212232	snoRNA	small nucleolar RNA, C/D box 17 [Source:HGNC Symbol;Acc:HGNC:32713]	SNORD17	0.564092	-0.681294	1.60842	0.204715	0.894806	Unchanged
ENSG00000231889	lncRNA	TRAF3IP2 antisense RNA 1 [Source:HGNC Symbol;Acc:HGNC:40005]	TRAF3IP2-AS1	-0.094079	3.87566	1.61004	0.204486	0.894806	Unchanged
ENSG00000261373	lncRNA	VPS9D1 antisense RNA 1 [Source:HGNC Symbol;Acc:HGNC:48915]	VPS9D1-AS1	0.103973	4.22018	1.60487	0.205214	0.894806	Unchanged
ENSG00000216471	processed_pseudogene	ribosomal protein SA pseudogene 43 [Source:HGNC Symbol;Acc:HGNC:35501]	RPSAP43	-0.793998	-1.26225	1.58697	0.207759	0.89557	Unchanged
ENSG00000267264	processed_pseudogene	vomeronasal receptor pseudogene	AC006504.3	-0.407481	-0.308875	1.58645	0.207835	0.895698	Unchanged
ENSG00000280378	TEC	TEC	AL353898.3	0.411793	-0.0958159	1.581	0.208617	0.896916	Unchanged
ENSG00000287811	lncRNA	novel transcript	AL391840.3	-0.287405	0.632505	1.58095	0.208624	0.896916	Unchanged
ENSG00000277873	lncRNA	novel transcript, antisense to RFC5	AC131159.2	-0.666115	-1.65444	1.57971	0.208803	0.896941	Unchanged
ENSG00000234585	transcribed_unprocessed_pseudogene	chaperonin containing TCP1 subunit 6 pseudogene 3 [Source:HGNC Symbol;Acc:HGNC:35137]	CCT6P3	-0.159525	2.52095	1.57821	0.209019	0.896941	Unchanged
ENSG00000232794	processed_pseudogene	heterogeneous nuclear ribonucleoprotein D pseudogene 1 [Source:HGNC Symbol;Acc:HGNC:5038]	HNRNPDP1	0.559084	-1.34588	1.57779	0.209079	0.896941	Unchanged
ENSG00000233515	lncRNA	long intergenic non-protein coding RNA 1518 [Source:HGNC Symbol;Acc:HGNC:51216]	LINC01518	-0.136474	2.48791	1.57727	0.209154	0.896941	Unchanged
ENSG00000226686	lncRNA	long intergenic non-protein coding RNA 1535 [Source:HGNC Symbol;Acc:HGNC:51282]	LINC01535	0.220287	1.43181	1.57624	0.209304	0.896941	Unchanged
ENSG00000246859	lncRNA	STARD4 antisense RNA 1 [Source:HGNC Symbol;Acc:HGNC:44117]	STARD4-AS1	-0.301198	0.407074	1.58022	0.208729	0.896941	Unchanged
ENSG00000278867	TEC	TEC	AC090616.6	0.385183	-0.345655	1.5756	0.209396	0.897	Unchanged
ENSG00000214223	processed_pseudogene	heterogeneous nuclear ribonucleoprotein A1 pseudogene 10 [Source:HGNC Symbol;Acc:HGNC:39128]	HNRNPA1P10	-0.598133	-1.49188	1.57364	0.209679	0.897144	Unchanged
ENSG00000247363	lncRNA	novel transcript	AC090061.1	0.61976	-1.49176	1.57158	0.209977	0.897587	Unchanged
ENSG00000255236	lncRNA	novel transcript	AP002992.1	0.480587	-0.876469	1.57074	0.2101	0.897717	Unchanged
ENSG00000277450	lncRNA	novel transcript, sense intronic to transcript readthrough between TMEM199 and SARM1	AC002094.4	-0.32202	-0.133015	1.56111	0.211502	0.897784	Unchanged
ENSG00000230084	lncRNA	novel transcript	AC006059.1	-0.519614	-1.27263	1.56923	0.210319	0.897784	Unchanged
ENSG00000247324	lncRNA	novel transcript, antisense to ZNF23	AC010547.1	0.435884	-0.674484	1.55551	0.212324	0.897784	Unchanged
ENSG00000261303	transcribed_unprocessed_pseudogene	Golgin subfamily A pseudogene	AC022748.2	-0.405882	-0.345642	1.55791	0.211971	0.897784	Unchanged
ENSG00000272518	lncRNA	novel transcript, sense intronic to MRPS28	AC036214.2	0.313378	-0.0396485	1.5663	0.210745	0.897784	Unchanged
ENSG00000287445	lncRNA	novel transcript	AC092803.3	0.668563	-1.6155	1.55531	0.212353	0.897784	Unchanged
ENSG00000214776	transcribed_unprocessed_pseudogene	alpha-2-macroglobulin like 1 pseudogene	AC092821.1	-0.225343	1.33103	1.57026	0.210169	0.897784	Unchanged
ENSG00000287089	lncRNA	novel transcript, antisense to MLN	AL138889.3	0.877646	-1.68113	1.56401	0.21108	0.897784	Unchanged
ENSG00000231530	lncRNA	novel transcript	AL157932.1	-0.70821	-1.85293	1.5574	0.212046	0.897784	Unchanged
ENSG00000228817	lncRNA	BACH1 intronic transcript 2 [Source:HGNC Symbol;Acc:HGNC:40007]	BACH1-IT2	0.431623	-0.628511	1.55902	0.211809	0.897784	Unchanged
ENSG00000233057	processed_pseudogene	eukaryotic translation elongation factor 1 alpha 1 pseudogene 14 [Source:HGNC Symbol;Acc:HGNC:3197]	EEF1A1P14	-0.688059	-1.23256	1.55835	0.211907	0.897784	Unchanged
ENSG00000253954	processed_pseudogene	high mobility group nucleosome binding domain 1 pseudogene 38 [Source:HGNC Symbol;Acc:HGNC:39422]	HMGN1P38	-0.654338	-1.26244	1.55549	0.212327	0.897784	Unchanged
ENSG00000181798	lncRNA	long intergenic non-protein coding RNA 471 [Source:HGNC Symbol;Acc:HGNC:28668]	LINC00471	0.230235	1.363	1.56459	0.210994	0.897784	Unchanged
ENSG00000225578	lncRNA	NCBP2 antisense RNA 1 [Source:HGNC Symbol;Acc:HGNC:40392]	NCBP2-AS1	0.636691	-1.45663	1.56747	0.210575	0.897784	Unchanged
ENSG00000232713	processed_pseudogene	ribosomal protein S12 pseudogene 3 [Source:HGNC Symbol;Acc:HGNC:35500]	RPS12P3	-0.649332	-1.38913	1.56848	0.210428	0.897784	Unchanged
ENSG00000248508	lncRNA	SRP14 antisense RNA1 (head to head) [Source:HGNC Symbol;Acc:HGNC:48619]	SRP14-AS1	-0.110633	3.8254	1.56107	0.211509	0.897784	Unchanged
ENSG00000239405	processed_pseudogene	transmembrane p24 trafficking protein 10 pseudogene 2 [Source:HGNC Symbol;Acc:HGNC:38105]	TMED10P2	0.389573	0.0278322	1.55962	0.21172	0.897784	Unchanged
ENSG00000234062	transcribed_unprocessed_pseudogene	transmembrane 9 superfamily member 2 (TM9SF2) pseudogene	AL390879.1	0.173099	2.12524	1.55482	0.212425	0.897805	Unchanged
ENSG00000268401	lncRNA	novel transcript	AC007785.3	-0.4867	-0.055533	1.55205	0.212832	0.899333	Unchanged
ENSG00000228939	lncRNA	AKT3 intronic transcript 1 [Source:HGNC Symbol;Acc:HGNC:41304]	AKT3-IT1	-0.44205	-0.515737	1.55092	0.212999	0.899842	Unchanged
ENSG00000237370	lncRNA	novel transcript	AC010907.2	0.710861	-1.56485	1.55026	0.213096	0.899895	Unchanged
ENSG00000227666	processed_pseudogene	CYCS pseudogene 24 [Source:HGNC Symbol;Acc:HGNC:24398]	CYCSP24	-0.624539	-1.3036	1.55021	0.213104	0.899895	Unchanged
ENSG00000267436	lncRNA	novel transcript, antisense to MFSD12	AC005786.3	0.428513	-0.583704	1.54903	0.213278	0.900435	Unchanged
ENSG00000231609	lncRNA	novel transcript, antisense to EHBP1	AC007098.1	0.147648	2.49654	1.54534	0.213825	0.900706	Unchanged
ENSG00000272913	lncRNA	novel transcript	AC009237.14	-0.342318	0.053393	1.53966	0.214669	0.900706	Unchanged
ENSG00000255160	lncRNA	novel transcript	AC009652.1	-0.498482	-1.04765	1.5355	0.215288	0.900706	Unchanged
ENSG00000267769	lncRNA	novel transcript, antisense to UBX6	AC011498.6	0.379445	-0.161243	1.53826	0.214878	0.900706	Unchanged
ENSG00000268230	lncRNA	novel transcript	AC012313.3	-0.293498	0.368138	1.5375	0.21499	0.900706	Unchanged
ENSG00000274105	lncRNA	novel transcript, sense intronic to YARS2	AC084824.3	-0.351506	-0.35671	1.53462	0.215421	0.900706	Unchanged
ENSG00000273369	lncRNA	novel transcript, antisense to GUF1	AC096586.2	0.656114	-1.68142	1.54604	0.21372	0.900706	Unchanged
ENSG00000232545	lncRNA	novel transcript	AC253536.3	0.314119	0.412849	1.53967	0.214666	0.900706	Unchanged
ENSG00000228201	lncRNA	novel transcript	AL022341.1	-0.475569	-0.736289	1.53852	0.214838	0.900706	Unchanged
ENSG00000285650	lncRNA	Novel transcript, antisense to CENPP	AL157827.2	-0.819637	-1.64104	1.5343	0.215469	0.900706	Unchanged
ENSG00000287759	lncRNA	novel transcript, antisense to AK3	AL353151.2	0.408566	-0.257549	1.53596	0.215219	0.900706	Unchanged
ENSG00000280367	TEC	novel transcript	AP002364.1	0.329324	0.0246065	1.53939	0.214709	0.900706	Unchanged
ENSG00000228314	transcribed_unprocessed_pseudogene	cytochrome P450 family 4 subfamily F member 29, pseudogene [Source:HGNC Symbol;Acc:HGNC:2647]	CYP4F29P	-0.184018	2.06464	1.54754	0.213499	0.900706	Unchanged
ENSG00000187686	transcribed_processed_pseudogene	keratin 18 pseudogene 59 [Source:HGNC Symbol;Acc:HGNC:48886]	KRT18P59	-0.486957	-0.853006	1.53512	0.215346	0.900706	Unchanged
ENSG00000239272	processed_pseudogene	ribosomal protein L21 pseudogene 10 [Source:HGNC Symbol;Acc:HGNC:19795]	RPL21P10	0.465366	-1.10119	1.53991	0.214631	0.900706	Unchanged
ENSG00000236806	processed_pseudogene	ribosomal protein L7a pseudogene 15 [Source:HGNC Symbol;Acc:HGNC:36873]	RPL7AP15	-0.781997	-1.85258	1.53903	0.214763	0.900706	Unchanged
ENSG00000176700	transcribed_unprocessed_pseudogene	SCAN domain containing 2 pseudogene [Source:HGNC Symbol;Acc:HGNC:10567]	SCAND2P	-0.116311	3.44081	1.53851	0.21484	0.900706	Unchanged
ENSG00000198155	transcribed_unprocessed_pseudogene	zinc finger protein 876, pseudogene [Source:HGNC Symbol;Acc:HGNC:32472]	ZNF876P	0.0882926	4.12005	1.54025	0.21458	0.900706	Unchanged
ENSG00000272831	lncRNA	novel transcript, antisense to RABGEF1	AC027644.3	0.146118	2.47217	1.53218	0.215786	0.900874	Unchanged
ENSG00000226070	lncRNA	novel transcript	AL139275.1	-0.354838	-0.208157	1.53367	0.215562	0.900874	Unchanged
ENSG00000250874	lncRNA	novel transcript	AC010595.1	-0.408328	-0.0306118	1.53025	0.216075	0.90092	Unchanged
ENSG00000276272	lncRNA	novel transcript	AC024884.2	0.626676	-1.11877	1.53161	0.215872	0.90092	Unchanged
ENSG00000229585	processed_pseudogene	ribosomal protein L21 pseudogene 44 [Source:HGNC Symbol;Acc:HGNC:33820]	RPL21P44	0.611199	-1.46841	1.52829	0.216369	0.901008	Unchanged
ENSG00000185986	transcribed_unprocessed_pseudogene	succinate dehydrogenase complex flavoprotein subunit A pseudogene 3 [Source:HGNC Symbol;Acc:HGNC:18781]	SDHAP3	-0.0869953	4.42149	1.52765	0.216466	0.901008	Unchanged
ENSG00000165511	lncRNA	ZNF22 antisense RNA 1 [Source:HGNC Symbol;Acc:HGNC:23509]	ZNF22-AS1	-0.288711	0.568525	1.52803	0.216408	0.901008	Unchanged
ENSG00000270557	lncRNA	novel transcript	AC013731.1	0.466457	-0.491847	1.52344	0.2171	0.901144	Unchanged
ENSG00000254595	processed_pseudogene	voltage-dependent anion channel 1(VDAC1) pseudogene	AC084337.1	0.546377	-0.954915	1.52648	0.216642	0.901144	Unchanged
ENSG00000277449	lncRNA	CEBPB antisense RNA 1 [Source:HGNC Symbol;Acc:HGNC:51226]	CEBPB-AS1	0.416506	0.285758	1.52514	0.216843	0.901144	Unchanged
ENSG00000181097	lncRNA	long intergenic non-protein coding RNA 2878 [Source:HGNC Symbol;Acc:HGNC:54524]	LINC02878	-0.376286	-0.373422	1.52363	0.217071	0.901144	Unchanged
ENSG00000213683	processed_pseudogene	small nuclear ribonucleoprotein polypeptide A' (SNRPA1) pseudogene	AC002056.1	0.657097	-1.55207	1.48212	0.223443	0.901346	Unchanged
ENSG00000275936	lncRNA	novel transcript, antisense to PXN	AC004263.1	0.723794	-1.68102	1.50518	0.219876	0.901346	Unchanged
ENSG00000279726	lncRNA	novel transcript, antisense to PCDHA5, PCDHA4, PCDHA3, PCDHA2 and PCDHA1	AC005609.5	-0.18339	1.48944	1.45459	0.227793	0.901346	Unchanged
ENSG00000269968	lncRNA	novel transcript, antisense to GAPDH	AC006064.4	-0.229973	3.38358	1.49722	0.221099	0.901346	Unchanged
ENSG00000286565	lncRNA	novel transcript	AC006348.1	0.902799	-2.01313	1.49092	0.222074	0.901346	Unchanged
ENSG00000279407	TEC	TEC	AC007191.1	0.183622	2.22823	1.47065	0.225242	0.901346	Unchanged
ENSG00000279764	TEC	TEC	AC009102.3	-0.605287	-1.55231	1.45401	0.227886	0.901346	Unchanged
ENSG00000272692	lncRNA	novel transcript	AC010997.4	0.324161	0.0487646	1.52013	0.2176	0.901346	Unchanged
ENSG00000268573	lncRNA	novel transcript	AC011815.1	0.235916	0.88741	1.50431	0.220009	0.901346	Unchanged
ENSG00000279348	TEC	TEC	AC012513.3	-0.0668112	5.60954	1.46486	0.226158	0.901346	Unchanged
ENSG00000254325	lncRNA	novel transcript	AC018607.1	0.505903	-0.74987	1.51149	0.218912	0.901346	Unchanged
ENSG00000274104	lncRNA	novel transcript	AC020910.5	0.359751	-0.571208	1.48293	0.223316	0.901346	Unchanged
ENSG00000275097	lncRNA	novel transcript, overlapping 3'UTR of FAM60A	AC024940.5	0.579385	-1.10981	1.45058	0.228435	0.901346	Unchanged
ENSG00000275645	lncRNA	novel transcript, antisense to NEIL1	AC068338.3	0.389247	-0.510407	1.48391	0.223164	0.901346	Unchanged
ENSG00000223559	processed_pseudogene	exportin, tRNA (nuclear export receptor for tRNAs) (XPOT) pseudogene	AC073136.1	-0.614027	-1.13665	1.47001	0.225345	0.901346	Unchanged
ENSG00000286342	lncRNA	novel transcript	AC073210.3	0.369858	-0.648189	1.45424	0.227849	0.901346	Unchanged
ENSG00000260331	lncRNA	novel transcript	AC079148.1	-0.385719	-0.0559772	1.45286	0.22807	0.901346	Unchanged
ENSG00000279361	TEC	TEC	AC079331.1	0.636226	-1.37811	1.49009	0.222202	0.901346	Unchanged
ENSG00000275479	lncRNA	novel transcript	AC087741.2	0.622275	-1.50396	1.46589	0.225995	0.901346	Unchanged
ENSG00000274667	lncRNA	novel transcript, sense intronic to	AC090517.2	0.340517	-0.325119	1.45271	0.228093	0.901346	Unchanged
ENSG00000251125	lncRNA	novel transcript	AC091860.2	-0.555399	-1.21312	1.47677	0.22428	0.901346	Unchanged
ENSG00000255669	transcribed_unitary_pseudogene	maestro heat-like repeat-containing protein family pseudogene	AC092471.1	-0.471345	-0.938929	1.45003	0.228523	0.901346	Unchanged
ENSG00000278985	TEC	novel transcript	AC092718.6	0.367189	0.0692084	1.49393	0.221608	0.901346	Unchanged
ENSG00000286830	lncRNA	novel transcript	AC105052.5	-0.411905	-0.319918	1.49629	0.221243	0.901346	Unchanged
ENSG00000275910	lncRNA	novel transcript, antisense to PDXDC1	AC138932.4	0.402104	-0.367598	1.47155	0.225101	0.901346	Unchanged
ENSG00000225200	processed_pseudogene	ribosomal protein S8 (RPS8) pseudogene	AC246787.1	-0.192796	1.77142	1.51074	0.219027	0.901346	Unchanged
ENSG00000260721	lncRNA	novel transcript	AF067845.1	0.709389	-1.69462	1.49669	0.221182	0.901346	Unchanged
ENSG00000212371	snoRNA		AF111168.1	-0.563614	-0.970729	1.4648	0.226168	0.901346	Unchanged
ENSG00000272277	lncRNA	novel transcript, antisense to RIPK1	AL031963.3	0.264206	0.718476	1.48824	0.22249	0.901346	Unchanged
ENSG00000272892	lncRNA	novel transcript	AL133551.1	0.644363	-1.41152	1.51864	0.217826	0.901346	Unchanged
ENSG00000274204	lncRNA	novel transcript, sense intronic to EFNB2	AL138689.1	0.581148	-1.64139	1.46772	0.225706	0.901346	Unchanged
ENSG00000244332	lncRNA	novel transcript	AL138759.1	0.421957	-0.527777	1.50917	0.219266	0.901346	Unchanged
ENSG00000276957	lncRNA	novel transcript	AL158063.1	0.558675	-1.58983	1.50264	0.220266	0.901346	Unchanged
ENSG00000279982	TEC	TEC	AL162274.3	0.484587	-1.28329	1.4963	0.221241	0.901346	Unchanged
ENSG00000176868	lncRNA	novel transcript, antisense to PRRC2B	AL358781.1	0.423478	-0.589715	1.50123	0.220482	0.901346	Unchanged
ENSG00000275401	lncRNA	novel transcript	AL391095.3	0.400733	-0.293806	1.45284	0.228073	0.901346	Unchanged
ENSG00000283010	lncRNA	novel transcript	AL589826.2	0.714851	-1.82274	1.46114	0.226749	0.901346	Unchanged
ENSG00000286747	lncRNA	novel transcript	AL627095.2	0.333748	-0.330454	1.4876	0.222589	0.901346	Unchanged
ENSG00000259031	lncRNA	novel transcript	AL845552.2	-0.471878	-0.97143	1.47376	0.224753	0.901346	Unchanged
ENSG00000236977	lncRNA	ANKRD44 intronic transcript 1 [Source:HGNC Symbol;Acc:HGNC:41477]	ANKRD44-IT1	0.625417	-0.29838	1.44948	0.228612	0.901346	Unchanged
ENSG00000234509	lncRNA	novel transcript	AP000253.1	0.481612	-1.10982	1.48557	0.222906	0.901346	Unchanged
ENSG00000279138	TEC	TEC	AP002847.1	-0.69303	-1.62816	1.45177	0.228244	0.901346	Unchanged
ENSG00000260949	lncRNA	novel transcript, overlapping to EIF4EBP1	AP006545.1	-0.22033	1.54211	1.50496	0.21991	0.901346	Unchanged
ENSG00000258655	lncRNA	ARHGAP5 antisense RNA 1 (head to head) [Source:HGNC Symbol;Acc:HGNC:20279]	ARHGAP5-AS1	-0.259481	0.711608	1.48253	0.223379	0.901346	Unchanged
ENSG00000231233	lncRNA	CFAP58 divergent transcript [Source:HGNC Symbol;Acc:HGNC:45243]	CFAP58-DT	-0.515505	-1.01314	1.45194	0.228218	0.901346	Unchanged
ENSG00000242193	transcribed_unitary_pseudogene	crystallin zeta like 2, pseudogene [Source:HGNC Symbol;Acc:HGNC:52164]	CRYZL2P	0.410044	-0.736849	1.50145	0.220449	0.901346	Unchanged
ENSG00000205702	polymorphic_pseudogene	cytochrome P450 family 2 subfamily D member 7 (gene/pseudogene) [Source:HGNC Symbol;Acc:HGNC:2624]	CYP2D7	0.301363	0.59677	1.4804	0.223712	0.901346	Unchanged
ENSG00000232486	processed_pseudogene	DEP domain containing 1 pseudogene 2 [Source:HGNC Symbol;Acc:HGNC:33975]	DEPDC1P2	-0.706577	-1.68151	1.50717	0.219571	0.901346	Unchanged
ENSG00000233871	lncRNA	DLG5 antisense RNA 1 [Source:HGNC Symbol;Acc:HGNC:45109]	DLG5-AS1	-0.231066	0.944198	1.4852	0.222963	0.901346	Unchanged
ENSG00000182397	transcribed_unprocessed_pseudogene	dynamin 1 pseudogene 46 [Source:HGNC Symbol;Acc:HGNC:35199]	DNM1P46	0.476224	-1.22333	1.50545	0.219835	0.901346	Unchanged
ENSG00000254270	processed_pseudogene	ERH pseudogene 1 [Source:HGNC Symbol;Acc:HGNC:41916]	ERHP1	0.790279	-1.94688	1.50973	0.219181	0.901346	Unchanged
ENSG00000204860	lncRNA	family with sequence similarity 201 member A [Source:HGNC Symbol;Acc:HGNC:27239]	FAM201A	0.289017	0.629725	1.49221	0.221874	0.901346	Unchanged
ENSG00000233369	transcribed_processed_pseudogene	general transcription factor IIi pseudogene 4 [Source:HGNC Symbol;Acc:HGNC:51716]	GTF2IP4	-0.0816381	4.30904	1.47886	0.223954	0.901346	Unchanged
ENSG00000256356	processed_pseudogene	heat shock protein family A (Hsp70) member 8 pseudogene 5 [Source:HGNC Symbol;Acc:HGNC:44920]	HSPA8P5	-0.462852	-0.382951	1.4926	0.221813	0.901346	Unchanged
ENSG00000188185	lncRNA	long intergenic non-protein coding RNA 265 [Source:HGNC Symbol;Acc:HGNC:28019]	LINC00265	-0.0837708	4.34455	1.46997	0.225351	0.901346	Unchanged
ENSG00000280989	lncRNA	long intergenic non-protein coding RNA 581 [Source:HGNC Symbol;Acc:HGNC:43840]	LINC00581	0.374945	-0.722949	1.48824	0.22249	0.901346	Unchanged
ENSG00000258279	lncRNA	long intergenic non-protein coding RNA 592 [Source:HGNC Symbol;Acc:HGNC:27474]	LINC00592	0.565472	-1.66807	1.48609	0.222824	0.901346	Unchanged
ENSG00000277147	transcribed_unprocessed_pseudogene	long intergenic non-protein coding RNA 869 [Source:HGNC Symbol;Acc:HGNC:29050]	LINC00869	-0.511639	-0.615397	1.51736	0.21802	0.901346	Unchanged
ENSG00000205611	lncRNA	long intergenic non-protein coding RNA 1597 [Source:HGNC Symbol;Acc:HGNC:51594]	LINC01597	0.552174	-1.40046	1.48472	0.223037	0.901346	Unchanged
ENSG00000230415	lncRNA	long intergenic non-protein coding RNA 1786 [Source:HGNC Symbol;Acc:HGNC:52575]	LINC01786	0.321247	-0.175112	1.4722	0.224998	0.901346	Unchanged
ENSG00000251432	lncRNA	long intergenic non-protein coding RNA 2615 [Source:HGNC Symbol;Acc:HGNC:53402]	LINC02615	-0.212775	1.28743	1.48555	0.222909	0.901346	Unchanged
ENSG00000262402	processed_pseudogene	MCUR1 pseudogene 1 [Source:HGNC Symbol;Acc:HGNC:1217]	MCUR1P1	0.768354	-1.6947	1.45141	0.228303	0.901346	Unchanged
ENSG00000226819	lncRNA	MEIS1 antisense RNA 3 [Source:HGNC Symbol;Acc:HGNC:40369]	MEIS1-AS3	-0.448491	-0.602706	1.49405	0.221589	0.901346	Unchanged
ENSG00000264349	miRNA	microRNA 4258 [Source:HGNC Symbol;Acc:HGNC:38281]	MIR4258	0.563315	-1.0742	1.45817	0.227222	0.901346	Unchanged
ENSG00000266437	miRNA	microRNA 4746 [Source:HGNC Symbol;Acc:HGNC:41904]	MIR4746	0.786858	-1.72213	1.51792	0.217935	0.901346	Unchanged
ENSG00000207741	miRNA	microRNA 590 [Source:HGNC Symbol;Acc:HGNC:32846]	MIR590	-0.370036	-0.179314	1.46938	0.225443	0.901346	Unchanged
ENSG00000210194	Mt_tRNA	mitochondrially encoded tRNA-Glu (GAA/G) [Source:HGNC Symbol;Acc:HGNC:7479]	MT-TE	0.2543	1.1087	1.48412	0.223132	0.901346	Unchanged
ENSG00000260455	lncRNA	neuroblastoma associated transcript 1 [Source:HGNC Symbol;Acc:HGNC:49075]	NBAT1	-0.155279	2.12452	1.49852	0.220899	0.901346	Unchanged
ENSG00000237037	lncRNA	NDUFA6 divergent transcript [Source:HGNC Symbol;Acc:HGNC:45273]	NDUFA6-DT	-0.418979	-0.193513	1.4927	0.221798	0.901346	Unchanged
ENSG00000254266	lncRNA	PKIA antisense RNA 1 [Source:HGNC Symbol;Acc:HGNC:51659]	PKIA-AS1	-0.640406	-1.34572	1.50319	0.22018	0.901346	Unchanged
ENSG00000253570	processed_pseudogene	ring finger protein 5 pseudogene 1 [Source:HGNC Symbol;Acc:HGNC:31053]	RNF5P1	0.653137	-1.66782	1.47389	0.224732	0.901346	Unchanged
ENSG00000213700	processed_pseudogene	ribosomal protein L17 pseudogene 50 [Source:HGNC Symbol;Acc:HGNC:45098]	RPL17P50	-0.657625	-1.40048	1.49605	0.221281	0.901346	Unchanged
ENSG00000225991	processed_pseudogene	ribosomal protein L23a pseudogene 34 [Source:HGNC Symbol;Acc:HGNC:36035]	RPL23AP34	0.517876	-1.1281	1.48734	0.22263	0.901346	Unchanged
ENSG00000234492	lncRNA	RPL34 divergent transcript [Source:HGNC Symbol;Acc:HGNC:26749]	RPL34-DT	0.383661	-0.308521	1.50372	0.2201	0.901346	Unchanged
ENSG00000249565	processed_pseudogene	SERPINE1 mRNA binding protein 1 pseudogene 5 [Source:HGNC Symbol;Acc:HGNC:44632]	SERBP1P5	0.230939	1.2919	1.45838	0.227189	0.901346	Unchanged
ENSG00000234771	lncRNA	SLC25A25 antisense RNA 1 [Source:HGNC Symbol;Acc:HGNC:27844]	SLC25A25-AS1	-0.082739	4.52221	1.46201	0.22661	0.901346	Unchanged
ENSG00000264350	processed_pseudogene	small nuclear ribonucleoprotein polypeptide G pseudogene 2 [Source:HGNC Symbol;Acc:HGNC:30999]	SNRPGP2	0.564394	-1.00475	1.49885	0.220848	0.901346	Unchanged
ENSG00000233966	processed_pseudogene	ubiquitin conjugating enzyme E2 S pseudogene 1 [Source:HGNC Symbol;Acc:HGNC:30864]	UBE2SP1	0.150634	2.40322	1.4901	0.222201	0.901346	Unchanged
ENSG00000234390	lncRNA	USP27X divergent transcript [Source:HGNC Symbol;Acc:HGNC:27249]	USP27X-AS1	-0.421362	-0.497573	1.47678	0.22428	0.901346	Unchanged
ENSG00000276141	transcribed_unprocessed_pseudogene	WAS protein homolog associated with actin, golgi membranes and microtubules pseudogene 3 [Source:HGNC Symbol;Acc:HGNC:27892]	WHAMMP3	-0.884795	-1.88322	1.51127	0.218946	0.901346	Unchanged
ENSG00000222881	misc_RNA	Y RNA [Source:RFAM;Acc:RF00019]	Y_RNA	0.383665	-0.628489	1.45774	0.22729	0.901346	Unchanged
ENSG00000250802	lncRNA	ZBED3 antisense RNA 1 [Source:HGNC Symbol;Acc:HGNC:44188]	ZBED3-AS1	0.106381	3.7997	1.49973	0.220713	0.901346	Unchanged
ENSG00000269834	lncRNA	ZNF528 antisense RNA 1 [Source:HGNC Symbol;Acc:HGNC:51305]	ZNF528-AS1	0.10406	3.48183	1.46178	0.226648	0.901346	Unchanged
ENSG00000215007	processed_pseudogene	DnaJ heat shock protein family (Hsp40) member A1 pseudogene 3 [Source:HGNC Symbol;Acc:HGNC:39339]	DNAJA1P3	-0.611897	-1.10943	1.44018	0.23011	0.903139	Unchanged
ENSG00000278175	lncRNA	glioblastoma down-regulated RNA [Source:HGNC Symbol;Acc:HGNC:48823]	GLIDR	-0.153083	2.03342	1.44338	0.229593	0.903139	Unchanged
ENSG00000272142	lncRNA	LYRM4 antisense RNA 1 [Source:NCBI gene (formerly Entrezgene);Acc:100129461]	LYRM4-AS1	-0.146128	2.67843	1.44291	0.229668	0.903139	Unchanged
ENSG00000235688	lncRNA	SNTG2 antisense RNA 1 [Source:HGNC Symbol;Acc:HGNC:54058]	SNTG2-AS1	0.561728	-1.08306	1.44004	0.230133	0.903139	Unchanged
ENSG00000255094	lncRNA	novel transcript	AC090159.1	-0.544386	-0.914353	1.43679	0.23066	0.903835	Unchanged
ENSG00000267938	unprocessed_pseudogene	eukaryotic translation initiation factor 1 pseudogene 6 [Source:HGNC Symbol;Acc:HGNC:49619]	EIF1P6	-0.712367	-1.94681	1.43695	0.230634	0.903835	Unchanged
ENSG00000239883	transcribed_unprocessed_pseudogene	poly(ADP-ribose) glycohydrolase pseudogene 1 [Source:HGNC Symbol;Acc:HGNC:45008]	PARGP1	0.0918166	3.67015	1.43766	0.230518	0.903835	Unchanged
ENSG00000202314	snoRNA	small nucleolar RNA, C/D box 6 [Source:HGNC Symbol;Acc:HGNC:32703]	SNORD6	0.560781	-0.930562	1.43667	0.230678	0.903835	Unchanged
ENSG00000253636	lncRNA	novel transcript	AC022893.1	-0.178752	2.0136	1.43601	0.230786	0.904028	Unchanged
ENSG00000264895	lncRNA	novel transcript, sense intronic to MBTD1	AC006141.1	0.300368	1.03615	1.43108	0.231589	0.904323	Unchanged
ENSG00000279693	TEC	novel transcript	AC099521.2	-0.18078	1.71393	1.42738	0.232193	0.904323	Unchanged
ENSG00000226359	processed_pseudogene	actin gamma 1 pseudogene 24 [Source:HGNC Symbol;Acc:HGNC:49661]	ACTG1P24	0.459717	-0.736378	1.43349	0.231196	0.904323	Unchanged
ENSG00000280758	lncRNA	novel transcript, antisense to SPTAN1	AL356481.3	-0.352038	0.00409681	1.42514	0.232559	0.904323	Unchanged
ENSG00000186162	transcribed_unprocessed_pseudogene	cell death inducing DFFA like effector c pseudogene 1 [Source:HGNC Symbol;Acc:HGNC:24230]	CIDECP1	0.147752	2.29824	1.42416	0.23272	0.904323	Unchanged
ENSG00000280927	lncRNA	CTBP1 antisense RNA [Source:HGNC Symbol;Acc:HGNC:48337]	CTBP1-AS	-0.494405	-0.914672	1.42459	0.232649	0.904323	Unchanged
ENSG00000263883	transcribed_processed_pseudogene	eukaryotic translation elongation factor 1 delta pseudogene 7 [Source:HGNC Symbol;Acc:HGNC:51457]	EEF1DP7	0.773606	-1.57684	1.42404	0.23274	0.904323	Unchanged
ENSG00000231177	lncRNA	long intergenic non-protein coding RNA 852 [Source:HGNC Symbol;Acc:HGNC:29904]	LINC00852	0.382231	-0.361994	1.43205	0.23143	0.904323	Unchanged
ENSG00000221949	lncRNA	long intergenic non-protein coding RNA 1465 [Source:HGNC Symbol;Acc:HGNC:26364]	LINC01465	-0.474581	-0.830166	1.43467	0.231005	0.904323	Unchanged
ENSG00000230102	lncRNA	long intergenic non-protein coding RNA 2028 [Source:HGNC Symbol;Acc:HGNC:27718]	LINC02028	-0.680974	-1.65432	1.42922	0.231891	0.904323	Unchanged
ENSG00000248323	lncRNA	lung cancer associated transcript 1 [Source:HGNC Symbol;Acc:HGNC:48498]	LUCAT1	0.611014	-1.77888	1.43142	0.231532	0.904323	Unchanged
ENSG00000257122	transcribed_unprocessed_pseudogene	RRN3 pseudogene 3 [Source:HGNC Symbol;Acc:HGNC:37620]	RRN3P3	0.1424	2.61357	1.42935	0.231871	0.904323	Unchanged
ENSG00000259834	lncRNA	novel transcript	AL365361.1	-0.102751	3.7153	1.42292	0.232924	0.904561	Unchanged
ENSG00000180673	processed_pseudogene	exocyst complex component 5 pseudogene 1 [Source:HGNC Symbol;Acc:HGNC:43870]	EXOC5P1	-0.618762	-1.5644	1.421	0.233239	0.904984	Unchanged
ENSG00000279377	TEC	TEC	AC003973.2	-0.582273	-1.66775	1.41552	0.234143	0.90543	Unchanged
ENSG00000271596	processed_pseudogene	family with sequence similarity 32, member A (FAM32A) pseudogene	AC008121.1	0.873024	-1.82259	1.41057	0.234962	0.90543	Unchanged
ENSG00000279557	TEC	TEC	AC010435.1	0.637647	-1.22274	1.40325	0.23618	0.90543	Unchanged
ENSG00000265458	lncRNA	NARF antisense RNA 2 [Source:HGNC Symbol;Acc:HGNC:55327]	AC132938.3	0.185962	1.45647	1.41293	0.234571	0.90543	Unchanged
ENSG00000287562	lncRNA	novel transcript	AL109615.4	0.126853	3.24709	1.40578	0.235758	0.90543	Unchanged
ENSG00000279632	TEC	novel transcript	AP003108.4	-0.342372	-0.30407	1.406	0.235721	0.90543	Unchanged
ENSG00000264529	transcribed_processed_pseudogene	DNAJB6 pseudogene 8 [Source:HGNC Symbol;Acc:HGNC:54761]	DNAJB6P8	-0.697249	-1.76418	1.403	0.236222	0.90543	Unchanged
ENSG00000196205	processed_pseudogene	eukaryotic translation elongation factor 1 alpha 1 pseudogene 5 [Source:HGNC Symbol;Acc:HGNC:3200]	EEF1A1P5	0.134632	2.9039	1.40359	0.236123	0.90543	Unchanged
ENSG00000236296	transcribed_processed_pseudogene	GUSB pseudogene 5 [Source:HGNC Symbol;Acc:HGNC:42319]	GUSBP5	-0.315893	-0.20889	1.41282	0.23459	0.90543	Unchanged
ENSG00000267325	lncRNA	long intergenic non-protein coding RNA 1415 [Source:HGNC Symbol;Acc:HGNC:50709]	LINC01415	-0.153745	2.22375	1.41501	0.234227	0.90543	Unchanged
ENSG00000261485	lncRNA	PAN3 antisense RNA 1 [Source:HGNC Symbol;Acc:HGNC:39932]	PAN3-AS1	0.229702	0.65373	1.40528	0.235841	0.90543	Unchanged
ENSG00000205746	transcribed_unprocessed_pseudogene	polycystin 1, transient receptor potential channel interacting pseudogene 4 [Source:HGNC Symbol;Acc:HGNC:30068]	PKD1P4	0.193579	1.79868	1.41885	0.233593	0.90543	Unchanged
ENSG00000205534	transcribed_unprocessed_pseudogene	SMG1 pseudogene 2 [Source:HGNC Symbol;Acc:HGNC:49859]	SMG1P2	-0.383962	-0.59613	1.40355	0.236131	0.90543	Unchanged
ENSG00000227536	processed_pseudogene	suppressor of cytokine signaling 5 pseudogene 4 [Source:HGNC Symbol;Acc:HGNC:44600]	SOCS5P4	-0.543549	-1.26267	1.40575	0.235762	0.90543	Unchanged
ENSG00000256238	processed_pseudogene	SPT16 homolog, facilitates chromatin remodeling subunit pseudogene 1 [Source:HGNC Symbol;Acc:HGNC:31388]	SUPT16HP1	0.220227	1.18703	1.4146	0.234295	0.90543	Unchanged
ENSG00000170919	lncRNA	TPT1 antisense RNA 1 [Source:HGNC Symbol;Acc:HGNC:43686]	TPT1-AS1	-0.0848589	4.7074	1.40493	0.235899	0.90543	Unchanged
ENSG00000223476	processed_pseudogene	vomeronasal 1 receptor 42 pseudogene [Source:HGNC Symbol;Acc:HGNC:37362]	VN1R42P	-0.425535	-0.164958	1.41053	0.234968	0.90543	Unchanged
ENSG00000286724	lncRNA	novel transcript, antisense to ADGRG2and PHKA2	AL732509.1	0.262178	0.808063	1.39684	0.237253	0.905984	Unchanged
ENSG00000258441	lncRNA	long intergenic non-protein coding RNA 641 [Source:HGNC Symbol;Acc:HGNC:27511]	LINC00641	-0.0424179	7.4928	1.39834	0.237001	0.905984	Unchanged
ENSG00000226415	processed_pseudogene	triosephosphate isomerase 1 pseudogene 1 [Source:HGNC Symbol;Acc:HGNC:35449]	TPI1P1	0.229919	0.959311	1.39874	0.236934	0.905984	Unchanged
ENSG00000258377	lncRNA	novel transcript	AL139099.1	-0.553813	-1.01296	1.39363	0.237793	0.906186	Unchanged
ENSG00000225193	transcribed_processed_pseudogene	ribosomal protein S12 pseudogene 26 [Source:HGNC Symbol;Acc:HGNC:36320]	RPS12P26	0.493465	-0.946372	1.39343	0.237827	0.906186	Unchanged
ENSG00000242779	transcribed_processed_pseudogene	zinc finger protein 702, pseudogene [Source:HGNC Symbol;Acc:HGNC:25775]	ZNF702P	-0.14019	2.59992	1.39437	0.237668	0.906186	Unchanged
ENSG00000224981	processed_pseudogene	tigger transposable element derived 1 (TIGD1) pseudogene	AC000367.1	-0.327703	-0.0134068	1.38417	0.239393	0.906228	Unchanged
ENSG00000259349	lncRNA	novel transcript, antisense to APPBP2	AC011921.1	0.346705	-0.0699431	1.39025	0.238364	0.906228	Unchanged
ENSG00000260417	lncRNA	novel transcript	AC092127.1	0.544057	0.0649414	1.385	0.239251	0.906228	Unchanged
ENSG00000274370	lncRNA	novel transcript	AC130371.2	0.651002	-1.40035	1.39028	0.238358	0.906228	Unchanged
ENSG00000286181	lncRNA	FOXP3 regulating long intergenic non-coding RNA	AC232271.3	-0.527051	-1.13718	1.3855	0.239166	0.906228	Unchanged
ENSG00000277287	lncRNA	novel transcript	AL109976.1	0.523053	-1.27313	1.38445	0.239344	0.906228	Unchanged
ENSG00000215866	lncRNA	long intergenic non-protein coding RNA 1356 [Source:HGNC Symbol;Acc:HGNC:50587]	LINC01356	0.412932	-0.509373	1.38908	0.238561	0.906228	Unchanged
ENSG00000250569	processed_pseudogene	N-terminal asparagine amidase pseudogene 2 [Source:HGNC Symbol;Acc:HGNC:45262]	NTAN1P2	0.29136	0.419476	1.39101	0.238235	0.906228	Unchanged
ENSG00000213228	transcribed_processed_pseudogene	ribosomal protein L12 pseudogene 38 [Source:HGNC Symbol;Acc:HGNC:36838]	RPL12P38	-0.791907	-1.77865	1.38892	0.238588	0.906228	Unchanged
ENSG00000273382	lncRNA	TMEM167B divergent transcript [Source:HGNC Symbol;Acc:HGNC:55076]	TMEM167B-DT	-0.19085	1.30866	1.38865	0.238633	0.906228	Unchanged
ENSG00000260128	transcribed_unprocessed_pseudogene	ULK4 pseudogene 2 [Source:HGNC Symbol;Acc:HGNC:15776]	ULK4P2	-0.454572	-0.90692	1.38334	0.239534	0.906228	Unchanged
ENSG00000214100	transcribed_unprocessed_pseudogene	placenta associated 9 pseudogene 1 [Source:HGNC Symbol;Acc:HGNC:52678]	PLAC9P1	-0.436088	-0.701235	1.38266	0.239649	0.90631	Unchanged
ENSG00000276814	lncRNA	novel transcript	AC004801.6	-0.381063	-0.160119	1.37596	0.240791	0.906328	Unchanged
ENSG00000273387	lncRNA	novel transcript, antisense to SMTN	AC005005.3	0.408451	-0.243083	1.38014	0.240077	0.906328	Unchanged
ENSG00000285872	lncRNA	novel transcript	AC007240.3	-0.455299	-0.860834	1.37722	0.240575	0.906328	Unchanged
ENSG00000271980	lncRNA	novel transcript, antisense to CCT5	AC012640.4	-0.738971	-1.64112	1.37843	0.24037	0.906328	Unchanged
ENSG00000224376	lncRNA	novel transcript	AC017104.1	-0.514877	-0.722067	1.37574	0.240827	0.906328	Unchanged
ENSG00000286535	lncRNA	novel transcript, antisense to ASAP1	AC139019.1	-0.454891	-0.852997	1.37785	0.240468	0.906328	Unchanged
ENSG00000275160	processed_pseudogene	ribosomal protein L7a (RPL7A) pseudogene	AL354718.1	-0.528443	-1.29343	1.37588	0.240805	0.906328	Unchanged
ENSG00000273891	lncRNA	novel transcript, antisense to NSMCE4A	AL731566.2	0.429609	-0.852801	1.37527	0.240909	0.906328	Unchanged
ENSG00000234788	processed_pseudogene	heat shock protein family A (Hsp70) member 8 pseudogene 3 [Source:HGNC Symbol;Acc:HGNC:44918]	HSPA8P3	0.461668	-0.922612	1.38149	0.239847	0.906328	Unchanged
ENSG00000176236	lncRNA	RPP38 divergent transcript [Source:HGNC Symbol;Acc:HGNC:28582]	RPP38-DT	-0.565666	-1.04751	1.37611	0.240764	0.906328	Unchanged
ENSG00000255108	lncRNA	novel transcript	AP006621.1	-0.474652	-0.915019	1.37106	0.241631	0.906643	Unchanged
ENSG00000237357	lncRNA	novel transcript	BX088651.4	0.642219	-1.80796	1.37069	0.241694	0.906643	Unchanged
ENSG00000279255	TEC	TEC	Z97653.2	0.441103	-0.729647	1.37237	0.241405	0.906643	Unchanged
ENSG00000272219	lncRNA	novel transcript, sense intronic to CUX1	AC005072.1	-0.329978	0.0328882	1.36451	0.242757	0.90687	Unchanged
ENSG00000250309	lncRNA	novel transcript	AC008453.1	0.400461	-0.648461	1.36275	0.243061	0.90687	Unchanged
ENSG00000249679	lncRNA	novel transcript, antisense to CCDC110	AC106897.1	-0.604186	-1.50371	1.3671	0.24231	0.90687	Unchanged
ENSG00000279930	TEC	TEC	AL032819.2	-0.630128	-1.68098	1.36392	0.242859	0.90687	Unchanged
ENSG00000285796	lncRNA	novel transcript	AL162458.1	0.114899	2.88198	1.36905	0.241976	0.90687	Unchanged
ENSG00000267080	lncRNA	ASB16 antisense RNA 1 [Source:HGNC Symbol;Acc:HGNC:25442]	ASB16-AS1	0.0982266	3.80614	1.36813	0.242134	0.90687	Unchanged
ENSG00000257185	lncRNA	long intergenic non-protein coding RNA 2293 [Source:HGNC Symbol;Acc:HGNC:53209]	LINC02293	-0.382796	-0.373226	1.36623	0.24246	0.90687	Unchanged
ENSG00000269293	lncRNA	ZSCAN16 antisense RNA 1 [Source:HGNC Symbol;Acc:HGNC:48982]	ZSCAN16-AS1	0.157258	2.0636	1.36574	0.242545	0.90687	Unchanged
ENSG00000227252	lncRNA	novel transcript, antisense to COPS8	AC012063.1	0.194722	1.65581	1.35541	0.244335	0.906873	Unchanged
ENSG00000250186	lncRNA	novel transcript, antisense to PHB	AC091180.3	-0.527982	-1.02159	1.35504	0.244398	0.906873	Unchanged
ENSG00000223959	transcribed_unitary_pseudogene	AFG3 like matrix AAA peptidase subunit 1, pseudogene [Source:HGNC Symbol;Acc:HGNC:314]	AFG3L1P	0.0648144	5.57414	1.35386	0.244605	0.906873	Unchanged
ENSG00000258982	lncRNA	novel transcript, antisense to YY1	AL133523.1	0.324983	-0.137362	1.35414	0.244556	0.906873	Unchanged
ENSG00000288015	lncRNA	novel transcript	AL159156.1	0.519801	-1.14669	1.35839	0.243816	0.906873	Unchanged
ENSG00000234345	processed_pseudogene	ELF2 pseudogene 1 [Source:HGNC Symbol;Acc:HGNC:33539]	ELF2P1	-0.250465	0.57987	1.35623	0.244192	0.906873	Unchanged
ENSG00000235720	processed_pseudogene	GABPA pseudogene [Source:HGNC Symbol;Acc:HGNC:4072]	GABPAP	-0.586793	-1.52774	1.35983	0.243566	0.906873	Unchanged
ENSG00000213609	processed_pseudogene	ribosomal protein L7a pseudogene 50 [Source:HGNC Symbol;Acc:HGNC:36117]	RPL7AP50	0.548207	-1.12772	1.35483	0.244435	0.906873	Unchanged
ENSG00000224723	unprocessed_pseudogene	GUSB pseudogene 10 [Source:HGNC Symbol;Acc:HGNC:42324]	GUSBP10	0.276903	0.54341	1.35054	0.245184	0.907	Unchanged
ENSG00000283235	lncRNA	novel transcript	AC139493.2	-0.471768	-1.06484	1.34969	0.245332	0.907195	Unchanged
ENSG00000248359	lncRNA	novel transcript	AC010280.1	0.570177	-1.4227	1.33728	0.247514	0.907195	Unchanged
ENSG00000267672	lncRNA	novel transcript	AC010632.2	0.693694	-1.55215	1.34379	0.246367	0.907195	Unchanged
ENSG00000267011	lncRNA	novel transcript	AC011498.1	-0.384209	-0.628213	1.3424	0.24661	0.907195	Unchanged
ENSG00000258053	lncRNA	novel transcript	AC025575.2	0.386119	-0.577488	1.33626	0.247694	0.907195	Unchanged
ENSG00000266677	lncRNA	novel transcript	AC087164.1	-0.558899	-1.44537	1.33776	0.247429	0.907195	Unchanged
ENSG00000241860	lncRNA	novel transcript	AL627309.5	-0.51306	-1.08278	1.33741	0.24749	0.907195	Unchanged
ENSG00000260254	lncRNA	novel transcript	AP000997.3	0.495334	-1.19378	1.34863	0.245517	0.907195	Unchanged
ENSG00000237350	processed_pseudogene	cell division cycle 42 pseudogene 6 [Source:HGNC Symbol;Acc:HGNC:44430]	CDC42P6	0.22975	0.895616	1.34321	0.246468	0.907195	Unchanged
ENSG00000259845	unprocessed_pseudogene	hect domain and RLD 2 pseudogene 10 [Source:HGNC Symbol;Acc:HGNC:39056]	HERC2P10	-0.396428	-0.427963	1.33679	0.247601	0.907195	Unchanged
ENSG00000234176	processed_pseudogene	heat shock protein family A (Hsp70) member 8 pseudogene 1 [Source:HGNC Symbol;Acc:HGNC:5245]	HSPA8P1	0.931304	-1.55185	1.343	0.246506	0.907195	Unchanged
ENSG00000229536	lncRNA	long intergenic non-protein coding RNA 2572 [Source:HGNC Symbol;Acc:HGNC:53634]	LINC02572	-0.483557	-1.30358	1.34272	0.246555	0.907195	Unchanged
ENSG00000146677	processed_pseudogene	ribosomal protein L32 pseudogene 18 [Source:HGNC Symbol;Acc:HGNC:36301]	RPL32P18	-0.204431	1.21745	1.3362	0.247705	0.907195	Unchanged
ENSG00000257043	processed_pseudogene	SRSF3 pseudogene 1 [Source:HGNC Symbol;Acc:HGNC:54691]	SRSF3P1	0.522853	-0.899106	1.34905	0.245443	0.907195	Unchanged
ENSG00000221406	miRNA	microRNA 320b-2 [Source:HGNC Symbol;Acc:HGNC:35256]	MIR320B2	0.68116	-1.75005	1.33563	0.247807	0.907228	Unchanged
ENSG00000262691	lncRNA	novel transcript	AC040160.1	-0.192751	1.86293	1.33459	0.24799	0.90727	Unchanged
ENSG00000272173	lncRNA	novel transcript, antisense to C12orf57	U47924.2	0.268575	0.75473	1.33451	0.248004	0.90727	Unchanged
ENSG00000270589	lncRNA	novel transcript, antisense to BBIP1	AL158163.1	-0.436769	-0.86063	1.33375	0.248139	0.907445	Unchanged
ENSG00000261046	processed_pseudogene	chromosome 2 open reading frame 69 pseudogene 1 [Source:HGNC Symbol;Acc:HGNC:51800]	C2orf69P1	0.209935	0.984066	1.3323	0.248397	0.907684	Unchanged
ENSG00000265018	transcribed_unprocessed_pseudogene	ArfGAP with GTPase domain, ankyrin repeat and PH domain 12, pseudogene [Source:HGNC Symbol;Acc:HGNC:23661]	AGAP12P	-0.272759	0.529438	1.32864	0.249047	0.907936	Unchanged
ENSG00000230534	lncRNA	novel transcript	AL392046.1	0.560449	-1.75047	1.32772	0.249211	0.907936	Unchanged
ENSG00000218350	processed_pseudogene	LYPLA1 pseudogene 3 [Source:HGNC Symbol;Acc:HGNC:44007]	LYPLA1P3	0.696366	-1.72188	1.32746	0.249258	0.907936	Unchanged
ENSG00000267254	lncRNA	ZNF790 antisense RNA 1 [Source:HGNC Symbol;Acc:HGNC:27617]	ZNF790-AS1	0.12017	3.62792	1.32981	0.248839	0.907936	Unchanged
ENSG00000274425	lncRNA	novel transcript, antisense to ICAM3	AC114271.1	-0.168462	1.99227	1.32444	0.249797	0.908632	Unchanged
ENSG00000224128	lncRNA	long intergenic non-protein coding RNA 1248 [Source:HGNC Symbol;Acc:HGNC:49842]	LINC01248	0.643033	-1.75032	1.3241	0.249858	0.908632	Unchanged
ENSG00000248008	lncRNA	negative regulator of antiviral response [Source:HGNC Symbol;Acc:HGNC:48588]	NRAV	-0.081003	4.08227	1.32351	0.249962	0.908632	Unchanged
ENSG00000213904	lncRNA	LIPE antisense RNA 1 [Source:HGNC Symbol;Acc:HGNC:48589]	LIPE-AS1	-0.239126	0.624758	1.32228	0.250184	0.908929	Unchanged
ENSG00000227615	processed_pseudogene	ribosomal protein S12 (RPS12) pseudogene	AP001324.1	-0.300147	-0.0133658	1.3205	0.250503	0.909593	Unchanged
ENSG00000273447	lncRNA	novel transcript, antisense to CASP6	AC004067.1	0.641975	-1.66784	1.30164	0.253914	0.91002	Unchanged
ENSG00000278765	lncRNA	novel transcript	AC004477.2	0.49562	-0.996281	1.30854	0.252658	0.91002	Unchanged
ENSG00000267598	lncRNA	novel transcript, antisense to IER2	AC011446.2	0.399641	-0.527606	1.30466	0.253363	0.91002	Unchanged
ENSG00000280061	TEC	TEC	AC011504.1	0.132615	2.33728	1.30211	0.253829	0.91002	Unchanged
ENSG00000268516	lncRNA	ZNF8 divergent transcript [Source:HGNC Symbol;Acc:HGNC:55280]	AC020915.2	-0.134103	2.37575	1.31375	0.251716	0.91002	Unchanged
ENSG00000250159	lncRNA	novel transcript	AC106791.1	-0.145166	2.37692	1.30394	0.253496	0.91002	Unchanged
ENSG00000227704	lncRNA	novel transcript	AL354892.1	0.33502	-0.222801	1.31125	0.252169	0.91002	Unchanged
ENSG00000259234	lncRNA	ANKRD34C antisense RNA 1 [Source:HGNC Symbol;Acc:HGNC:48618]	ANKRD34C-AS1	0.51911	-0.962928	1.30127	0.253982	0.91002	Unchanged
ENSG00000269944	lncRNA	novel transcript	AP001267.4	0.561963	-1.40028	1.30643	0.253042	0.91002	Unchanged
ENSG00000254824	processed_pseudogene	mitochondrially encoded NADH dehydrogenase 1 (MT-ND1) pseudogene	AP003461.1	-0.440765	-1.59004	1.31838	0.250884	0.91002	Unchanged
ENSG00000203808	lncRNA	BVES antisense RNA 1 [Source:HGNC Symbol;Acc:HGNC:21223]	BVES-AS1	-0.102113	3.74425	1.31092	0.252229	0.91002	Unchanged
ENSG00000255052	lncRNA	family with sequence similarity 66 member D [Source:HGNC Symbol;Acc:HGNC:24159]	FAM66D	-0.159787	1.93281	1.29996	0.254221	0.91002	Unchanged
ENSG00000245685	lncRNA	FRG1 divergent transcript [Source:HGNC Symbol;Acc:HGNC:51590]	FRG1-DT	0.216629	1.51001	1.31089	0.252234	0.91002	Unchanged
ENSG00000259706	processed_pseudogene	heat shock protein 90 beta family member 2, pseudogene [Source:HGNC Symbol;Acc:HGNC:12099]	HSP90B2P	-0.33219	0.306352	1.3009	0.25405	0.91002	Unchanged
ENSG00000228224	transcribed_processed_pseudogene	NACA family member 4, pseudogene [Source:HGNC Symbol;Acc:HGNC:24688]	NACA4P	0.642292	-1.7085	1.31035	0.252331	0.91002	Unchanged
ENSG00000227805	processed_pseudogene	ribosomal protein L21 pseudogene 90 [Source:HGNC Symbol;Acc:HGNC:35548]	RPL21P90	0.569601	-1.57725	1.3025	0.253757	0.91002	Unchanged
ENSG00000240342	processed_pseudogene	ribosomal protein S2 pseudogene 5 [Source:HGNC Symbol;Acc:HGNC:31386]	RPS2P5	0.0613268	6.30011	1.3099	0.252412	0.91002	Unchanged
ENSG00000238741	scaRNA	small Cajal body-specific RNA 7 [Source:HGNC Symbol;Acc:HGNC:32563]	SCARNA7	0.256488	0.837436	1.31212	0.252012	0.91002	Unchanged
ENSG00000227906	lncRNA	SNAP25 antisense RNA 1 [Source:HGNC Symbol;Acc:HGNC:44312]	SNAP25-AS1	-0.170304	1.92055	1.30367	0.253544	0.91002	Unchanged
ENSG00000242294	transcribed_unprocessed_pseudogene	stromal antigen 3-like 5 pseudogene [Source:HGNC Symbol;Acc:HGNC:48896]	STAG3L5P	0.145092	3.10396	1.30134	0.253969	0.91002	Unchanged
ENSG00000269345	unprocessed_pseudogene	vomeronasal 1 receptor 85 pseudogene [Source:HGNC Symbol;Acc:HGNC:37405]	VN1R85P	-0.738992	-1.79313	1.31082	0.252246	0.91002	Unchanged
ENSG00000213742	lncRNA	ZNF337 antisense RNA 1 [Source:HGNC Symbol;Acc:HGNC:40759]	ZNF337-AS1	0.151627	2.32021	1.3	0.254212	0.91002	Unchanged
ENSG00000257243	processed_pseudogene	PARK7 pseudogene 1 [Source:HGNC Symbol;Acc:HGNC:55066]	PARK7P1	-0.202817	1.18646	1.29963	0.254281	0.910058	Unchanged
ENSG00000224861	processed_pseudogene	Y-box binding protein 1 pseudogene 1 [Source:HGNC Symbol;Acc:HGNC:8015]	YBX1P1	0.207814	1.1553	1.29918	0.254364	0.910058	Unchanged
ENSG00000202058	misc_RNA	RN7SK pseudogene 80 [Source:HGNC Symbol;Acc:HGNC:45804]	RN7SKP80	-0.522882	-1.08276	1.29773	0.254628	0.91036	Unchanged
ENSG00000279794	TEC	TEC	AC024580.1	0.243143	0.713972	1.29529	0.255075	0.910579	Unchanged
ENSG00000231770	lncRNA	TMEM44 antisense RNA 1 [Source:HGNC Symbol;Acc:HGNC:44272]	TMEM44-AS1	-0.163956	1.50819	1.29638	0.254875	0.910579	Unchanged
ENSG00000234337	processed_pseudogene	tropomyosin 1 (alpha) (TPM1) pseudogene	AC026462.1	0.699661	-1.77864	1.29399	0.255313	0.910998	Unchanged
ENSG00000237232	lncRNA	ZNF295 antisense RNA 1 [Source:HGNC Symbol;Acc:HGNC:23130]	ZNF295-AS1	-0.476661	-0.875697	1.29324	0.255452	0.91108	Unchanged
ENSG00000268006	lncRNA	PTOV1 antisense RNA 1 [Source:HGNC Symbol;Acc:HGNC:44174]	PTOV1-AS1	0.15723	1.93581	1.2922	0.255642	0.911235	Unchanged
ENSG00000278876	TEC	TEC	AC145207.9	0.41628	-0.49182	1.28724	0.256558	0.911598	Unchanged
ENSG00000175170	lncRNA	family with sequence similarity 182 member B [Source:HGNC Symbol;Acc:HGNC:34503]	FAM182B	0.257552	0.517021	1.28743	0.256522	0.911598	Unchanged
ENSG00000245870	lncRNA	long intergenic non-protein coding RNA 682 [Source:HGNC Symbol;Acc:HGNC:44466]	LINC00682	-0.056641	5.36523	1.2888	0.25627	0.911598	Unchanged
ENSG00000242759	lncRNA	long intergenic non-protein coding RNA 882 [Source:HGNC Symbol;Acc:HGNC:48568]	LINC00882	0.309234	0.0286417	1.28709	0.256585	0.911598	Unchanged
ENSG00000225791	lncRNA	TRAM2 antisense RNA 1 (head to head) [Source:HGNC Symbol;Acc:HGNC:48663]	TRAM2-AS1	0.0911736	3.74069	1.28606	0.256776	0.911931	Unchanged
ENSG00000259209	lncRNA	novel transcript, antisense to ZFHX3	AC004943.1	-0.253725	1.08763	1.26613	0.260493	0.912292	Unchanged
ENSG00000261799	lncRNA	novel transcript	AC007406.4	-0.078936	4.30325	1.26396	0.260904	0.912292	Unchanged
ENSG00000268743	lncRNA	novel transcript, sense intronic SIN3B	AC008737.1	0.539324	-1.55252	1.25798	0.262034	0.912292	Unchanged
ENSG00000224152	lncRNA	novel transcript, antisense to BAZ2B	AC009506.1	-0.196567	1.19635	1.27577	0.258688	0.912292	Unchanged
ENSG00000214248	lncRNA	novel transcript, antisense to LRRC8E	AC010336.1	0.313279	0.0771922	1.27107	0.259567	0.912292	Unchanged
ENSG00000250332	processed_pseudogene	protein tyrosine phosphatase, non-receptor type 11 (PTPN11) pseudogene	AC010460.3	-0.793223	-1.93052	1.25693	0.262234	0.912292	Unchanged
ENSG00000280239	TEC	TEC	AC011498.7	0.13036	2.6876	1.2772	0.25842	0.912292	Unchanged
ENSG00000253730	lncRNA	novel transcript	AC015909.2	0.4594	-1.36782	1.27047	0.259678	0.912292	Unchanged
ENSG00000259797	lncRNA	novel transcript, intronic to PRMT7	AC020978.1	0.4021	-0.351464	1.28417	0.257126	0.912292	Unchanged
ENSG00000244953	lncRNA	novel transcript	AC087521.1	0.256379	0.670105	1.26947	0.259866	0.912292	Unchanged
ENSG00000271964	lncRNA	novel transcript, antisense to RFTN1	AC090948.1	0.363572	-0.1605	1.27133	0.259518	0.912292	Unchanged
ENSG00000267746	lncRNA	novel transcript, antisense to NOL4	AC104985.1	-0.424568	-0.979692	1.26205	0.261264	0.912292	Unchanged
ENSG00000260095	lncRNA	novel transcript, antisense to CCNF	AC106820.3	-0.36812	-0.339779	1.27761	0.258343	0.912292	Unchanged
ENSG00000242791	lncRNA	novel transcript	AC117395.1	-0.46316	-1.09147	1.27329	0.25915	0.912292	Unchanged
ENSG00000267681	transcribed_processed_pseudogene	high mobility group nucleosome binding domain 1 (HMGN1) pseudogene	AC135721.1	-0.3834	-0.450666	1.28007	0.257887	0.912292	Unchanged
ENSG00000256673	unprocessed_pseudogene	ovostatin (OVOS) pseudogene	AC141557.1	0.299945	0.36433	1.25533	0.262536	0.912292	Unchanged
ENSG00000286482	lncRNA	novel transcript	AL117344.2	0.15992	1.5383	1.27411	0.258996	0.912292	Unchanged
ENSG00000284642	lncRNA	novel transcript	AL139424.2	-0.173788	1.87651	1.2635	0.26099	0.912292	Unchanged
ENSG00000229312	lncRNA	novel transcript	AL353693.1	-0.354244	-0.540405	1.26423	0.260852	0.912292	Unchanged
ENSG00000224790	lncRNA	novel transcript	AP000704.1	0.196092	1.20664	1.27463	0.2589	0.912292	Unchanged
ENSG00000255345	lncRNA	novel transcript	AP002957.1	-0.493655	-1.45698	1.27451	0.258923	0.912292	Unchanged
ENSG00000255100	lncRNA	novel transcript	AP003119.2	-0.538953	-1.22292	1.26556	0.260601	0.912292	Unchanged
ENSG00000272168	lncRNA	cancer susceptibility 15 [Source:HGNC Symbol;Acc:HGNC:28245]	CASC15	0.0435464	6.42164	1.26776	0.260188	0.912292	Unchanged
ENSG00000229820	processed_pseudogene	DnaJ (Hsp40) homolog, subfamily C member 8 (DNAJC8) pseudogene	CR391992.1	-0.590709	-1.46834	1.27502	0.258827	0.912292	Unchanged
ENSG00000184608	lncRNA	FAM167A antisense RNA 1 [Source:HGNC Symbol;Acc:HGNC:15548]	FAM167A-AS1	-0.69751	-1.56428	1.26225	0.261226	0.912292	Unchanged
ENSG00000231787	processed_pseudogene	H2B histone pseudogene 9 [Source:HGNC Symbol;Acc:HGNC:54446]	H2BP9	-0.553702	-1.52789	1.26894	0.259965	0.912292	Unchanged
ENSG00000237125	lncRNA	HAND2 antisense RNA 1 [Source:HGNC Symbol;Acc:HGNC:48872]	HAND2-AS1	0.0426568	9.39021	1.28311	0.257321	0.912292	Unchanged
ENSG00000260231	lncRNA	KDM7A divergent transcript [Source:HGNC Symbol;Acc:HGNC:48959]	KDM7A-DT	0.176345	1.66325	1.26261	0.261158	0.912292	Unchanged
ENSG00000261008	lncRNA	long intergenic non-protein coding RNA 1572 [Source:HGNC Symbol;Acc:HGNC:51385]	LINC01572	-0.0965227	3.24103	1.26071	0.261517	0.912292	Unchanged
ENSG00000267767	lncRNA	long intergenic non-protein coding RNA 1801 [Source:HGNC Symbol;Acc:HGNC:52592]	LINC01801	-0.159157	1.88535	1.27584	0.258674	0.912292	Unchanged
ENSG00000259438	lncRNA	MAPK6 divergent transcript [Source:HGNC Symbol;Acc:HGNC:53900]	MAPK6-DT	0.665077	-1.82272	1.278	0.258272	0.912292	Unchanged
ENSG00000246067	lncRNA	RAB30 divergent transcript [Source:HGNC Symbol;Acc:HGNC:48672]	RAB30-DT	0.0884909	4.16546	1.28123	0.257671	0.912292	Unchanged
ENSG00000200095	snRNA	RNA, U6 small nuclear 181, pseudogene [Source:HGNC Symbol;Acc:HGNC:47144]	RNU6-181P	-0.702482	-1.73593	1.25439	0.262715	0.912292	Unchanged
ENSG00000231333	processed_pseudogene	ribosomal protein L34 pseudogene 6 [Source:HGNC Symbol;Acc:HGNC:35810]	RPL34P6	-0.516766	-1.46852	1.28157	0.257607	0.912292	Unchanged
ENSG00000233158	processed_pseudogene	ribosomal protein S24 pseudogene 6 [Source:HGNC Symbol;Acc:HGNC:36240]	RPS24P6	-0.645842	-1.70845	1.25712	0.262197	0.912292	Unchanged
ENSG00000227199	lncRNA	ST7 antisense RNA 1 [Source:HGNC Symbol;Acc:HGNC:16000]	ST7-AS1	0.13766	2.15457	1.26252	0.261174	0.912292	Unchanged
ENSG00000249494	lncRNA	novel transcript	AC008629.1	0.317309	-0.114454	1.25162	0.263244	0.912614	Unchanged
ENSG00000283667	lncRNA	novel transcript, antisense to SERPINB8	AC009802.1	-0.380276	-0.609391	1.25149	0.263267	0.912614	Unchanged
ENSG00000236529	lncRNA	novel transcript	AC093582.1	-0.174601	1.34833	1.25041	0.263474	0.912614	Unchanged
ENSG00000279700	TEC	novel transcript	AC131212.2	-0.275258	0.656042	1.25156	0.263254	0.912614	Unchanged
ENSG00000286975	lncRNA	novel transcript	AP005136.4	0.597898	-1.17447	1.2495	0.263649	0.912614	Unchanged
ENSG00000228501	processed_pseudogene	ribosomal protein L15 pseudogene 18 [Source:HGNC Symbol;Acc:HGNC:36515]	RPL15P18	0.317202	-0.248136	1.25078	0.263404	0.912614	Unchanged
ENSG00000225648	transcribed_unprocessed_pseudogene	SBDS pseudogene 1 [Source:HGNC Symbol;Acc:HGNC:21646]	SBDSP1	0.0931411	4.00737	1.25067	0.263425	0.912614	Unchanged
ENSG00000261054	lncRNA	novel transcript, antisense to SYNM	AC036108.2	-0.477998	-0.962885	1.24174	0.265135	0.913569	Unchanged
ENSG00000229525	lncRNA	novel transcript, antisense to DNPEP	AC053503.1	-0.408668	-0.628756	1.23655	0.266137	0.913569	Unchanged
ENSG00000287733	lncRNA	novel transcript	AC083862.2	-0.379023	-0.123656	1.23995	0.26548	0.913569	Unchanged
ENSG00000228998	transcribed_processed_pseudogene	PERP, TP53 apoptosis effector (PERP) pseudogene	AC091167.1	0.192501	1.73506	1.23855	0.265751	0.913569	Unchanged
ENSG00000287516	lncRNA	novel transcript	AL359764.2	0.436665	-1.13756	1.2367	0.266108	0.913569	Unchanged
ENSG00000268903	processed_pseudogene	novel pseudogene	AL627309.6	0.585873	-1.25249	1.23752	0.26595	0.913569	Unchanged
ENSG00000214973	processed_pseudogene	coiled-coil-helix-coiled-coil-helix domain containing 3 pseudogene 3 [Source:HGNC Symbol;Acc:HGNC:44699]	CHCHD3P3	0.69163	-1.77878	1.24336	0.264825	0.913569	Unchanged
ENSG00000235489	processed_pseudogene	DBF4 zinc finger pseudogene 1 [Source:HGNC Symbol;Acc:HGNC:45059]	DBF4P1	0.421335	-0.521199	1.24387	0.264727	0.913569	Unchanged
ENSG00000204682	lncRNA	MIR1915 host gene [Source:HGNC Symbol;Acc:HGNC:31448]	MIR1915HG	-0.0875033	3.63228	1.23704	0.266041	0.913569	Unchanged
ENSG00000201684	misc_RNA	RN7SK pseudogene 239 [Source:HGNC Symbol;Acc:HGNC:45963]	RN7SKP239	-0.600149	-1.57712	1.24527	0.264457	0.913569	Unchanged
ENSG00000213188	processed_pseudogene	Y-box binding protein 1 pseudogene 4 [Source:HGNC Symbol;Acc:HGNC:42425]	YBX1P4	-0.51893	-1.15556	1.24027	0.265419	0.913569	Unchanged
ENSG00000278668	lncRNA	novel transcript	AC005899.7	-0.687115	-1.45694	1.20461	0.272403	0.914023	Unchanged
ENSG00000277806	lncRNA	novel transcript, sense intronic to ZNF155	AC006213.4	-0.219823	1.33525	1.20293	0.272736	0.914023	Unchanged
ENSG00000248367	lncRNA	novel transcript	AC008610.1	0.339263	-0.0132032	1.21924	0.269509	0.914023	Unchanged
ENSG00000267939	lncRNA	novel transcript	AC008946.1	0.402756	-0.793738	1.20401	0.272522	0.914023	Unchanged
ENSG00000260495	lncRNA	novel transcript, antisense to GAN	AC009148.1	0.257627	0.632302	1.22976	0.267454	0.914023	Unchanged
ENSG00000267422	transcribed_processed_pseudogene	increased sodium tolerance 1 homolog (yeast) (IST1) pseudogene	AC016582.1	0.437415	-0.800731	1.2105	0.271233	0.914023	Unchanged
ENSG00000276523	lncRNA	novel transcript, antisense to GABARAPL2	AC025287.3	-0.727884	-1.68105	1.21573	0.2702	0.914023	Unchanged
ENSG00000267040	lncRNA	novel transcript, antisense to ATP8B1	AC027097.1	0.246488	1.69776	1.21889	0.269578	0.914023	Unchanged
ENSG00000287045	lncRNA	novel transcript, antisense to PLS1	AC072028.1	-0.313368	-0.3043	1.20656	0.272014	0.914023	Unchanged
ENSG00000279852	TEC	TEC	AC083964.2	-0.439292	-1.09172	1.23311	0.266802	0.914023	Unchanged
ENSG00000271959	lncRNA	novel transcript, antisense to MROH5	AC100803.4	-0.528447	-1.24279	1.225	0.268381	0.914023	Unchanged
ENSG00000205037	lncRNA	novel transcript	AC134312.1	-0.256391	-0.352381	1.21485	0.270373	0.914023	Unchanged
ENSG00000229122	lncRNA	AGBL5 intronic transcript 1 [Source:HGNC Symbol;Acc:HGNC:41484]	AGBL5-IT1	-0.916804	-1.96326	1.21369	0.270602	0.914023	Unchanged
ENSG00000268333	lncRNA	novel transcript	AL132655.1	0.329	0.131868	1.20072	0.273178	0.914023	Unchanged
ENSG00000273893	lncRNA	novel transcript, sense intronic to SLC13A3	AL133520.1	-0.223716	1.04158	1.2056	0.272205	0.914023	Unchanged
ENSG00000232936	lncRNA	novel transcript	AL157400.2	0.378517	-0.621889	1.21208	0.270922	0.914023	Unchanged
ENSG00000258904	lncRNA	novel transcript, intronic to YY1	AL157871.5	0.332092	-0.0392124	1.21343	0.270654	0.914023	Unchanged
ENSG00000272030	lncRNA	novel transcript, antisense to S100A1 and CHTOP	AL162258.2	0.700436	-1.6944	1.20968	0.271395	0.914023	Unchanged
ENSG00000285856	lncRNA	novel transcript, antisense to ARHGEF7	AL353704.1	0.503901	-1.46829	1.22255	0.268861	0.914023	Unchanged
ENSG00000282386	lncRNA	novel transcript, antisense to SLC39A1	AL358472.4	-0.252225	0.404012	1.23109	0.267194	0.914023	Unchanged
ENSG00000271978	lncRNA	novel transcript	AL359643.2	0.270681	0.563869	1.20816	0.271697	0.914023	Unchanged
ENSG00000237356	lncRNA	novel transcript	AL365295.1	0.218572	0.974053	1.21697	0.269955	0.914023	Unchanged
ENSG00000226609	lncRNA	novel transcript	AL390067.1	0.321892	-0.217799	1.20634	0.272058	0.914023	Unchanged
ENSG00000277352	lncRNA	novel transcript	AP001065.4	-0.240641	0.293356	1.2082	0.271689	0.914023	Unchanged
ENSG00000279672	TEC	TEC	AP006621.5	-0.223418	0.937285	1.20868	0.271593	0.914023	Unchanged
ENSG00000250444	processed_pseudogene	chaperonin containing TCP1 subunit 5 pseudogene 1 [Source:HGNC Symbol;Acc:HGNC:35135]	CCT5P1	-0.400846	-0.714925	1.20711	0.271905	0.914023	Unchanged
ENSG00000255121	lncRNA	CENATAC divergent transcript [Source:HGNC Symbol;Acc:HGNC:54215]	CENATAC-DT	0.14741	2.52077	1.20395	0.272534	0.914023	Unchanged
ENSG00000233837	processed_pseudogene	eukaryotic translation initiation factor 3 subunit L pseudogene 2 [Source:HGNC Symbol;Acc:HGNC:24657]	EIF3LP2	-0.703001	-2.04762	1.22772	0.267851	0.914023	Unchanged
ENSG00000235527	lncRNA	HIPK1 antisense RNA 1 [Source:HGNC Symbol;Acc:HGNC:50576]	HIPK1-AS1	0.611052	-1.61554	1.23034	0.267341	0.914023	Unchanged
ENSG00000242516	lncRNA	long intergenic non-protein coding RNA 960 [Source:HGNC Symbol;Acc:HGNC:48710]	LINC00960	0.53532	-0.997011	1.23365	0.266698	0.914023	Unchanged
ENSG00000254349	lncRNA	MIR2052 host gene [Source:HGNC Symbol;Acc:HGNC:51555]	MIR2052HG	0.323587	0.185165	1.22304	0.268765	0.914023	Unchanged
ENSG00000277681	miRNA	microRNA 6739 [Source:HGNC Symbol;Acc:HGNC:50165]	MIR6739	0.415048	-0.963287	1.20208	0.272906	0.914023	Unchanged
ENSG00000261971	lncRNA	MMP25 antisense RNA 1 [Source:HGNC Symbol;Acc:HGNC:51372]	MMP25-AS1	-0.156952	2.07014	1.2102	0.271292	0.914023	Unchanged
ENSG00000226953	lncRNA	NCKAP5 antisense RNA 2 [Source:HGNC Symbol;Acc:HGNC:54065]	NCKAP5-AS2	0.280614	-0.0788516	1.21907	0.269543	0.914023	Unchanged
ENSG00000225580	processed_pseudogene	proliferation-associated 2G4 pseudogene 5 [Source:HGNC Symbol;Acc:HGNC:32218]	PA2G4P5	0.365132	-0.267655	1.20297	0.27273	0.914023	Unchanged
ENSG00000213713	processed_pseudogene	phosphatidylinositol glycan anchor biosynthesis class C pseudogene 1 [Source:HGNC Symbol;Acc:HGNC:8961]	PIGCP1	-0.647615	-1.61498	1.2039	0.272543	0.914023	Unchanged
ENSG00000182841	transcribed_unprocessed_pseudogene	ribosomal RNA processing 7 homolog B, pseudogene [Source:HGNC Symbol;Acc:HGNC:30454]	RRP7BP	0.156995	2.71049	1.21708	0.269934	0.914023	Unchanged
ENSG00000250343	lncRNA	STK32A antisense RNA 1 [Source:HGNC Symbol;Acc:HGNC:53468]	STK32A-AS1	-0.696968	-1.58968	1.22056	0.269252	0.914023	Unchanged
ENSG00000215105	processed_pseudogene	tetratricopeptide repeat domain 3 pseudogene 1 [Source:HGNC Symbol;Acc:HGNC:23318]	TTC3P1	0.066098	4.87784	1.22335	0.268705	0.914023	Unchanged
ENSG00000260190	lncRNA	novel transcript, overlapping FBXW5	AL807752.5	0.504453	-0.996611	1.19924	0.273474	0.914308	Unchanged
ENSG00000230295	unprocessed_pseudogene	general transcription factor IIi pseudogene 23 [Source:HGNC Symbol;Acc:HGNC:51735]	GTF2IP23	-0.261712	0.939826	1.19791	0.27374	0.914308	Unchanged
ENSG00000223431	processed_pseudogene	MT-ND6 pseudogene 21 [Source:HGNC Symbol;Acc:HGNC:39639]	MTND6P21	-0.581741	-1.69479	1.19804	0.273713	0.914308	Unchanged
ENSG00000240509	processed_pseudogene	ribosomal protein L34 pseudogene 18 [Source:HGNC Symbol;Acc:HGNC:35968]	RPL34P18	0.452605	-0.667476	1.19847	0.273628	0.914308	Unchanged
ENSG00000267321	lncRNA	small nucleolar RNA host gene 30 [Source:HGNC Symbol;Acc:HGNC:52836]	SNHG30	0.145465	2.09464	1.19866	0.273589	0.914308	Unchanged
ENSG00000250043	lncRNA	novel transcript	AC106895.1	0.185072	1.25197	1.1964	0.274042	0.914444	Unchanged
ENSG00000283312	processed_pseudogene	GTF2I repeat domain containing 2(GTF2IRD2) pseudogene	AC017104.3	-0.185712	1.7105	1.1956	0.274203	0.914668	Unchanged
ENSG00000249655	lncRNA	novel transcript	AC008434.1	0.255259	0.325062	1.19105	0.275117	0.915816	Unchanged
ENSG00000271795	lncRNA	novel transcript, antisense to FAT2	AC011337.1	0.200038	0.770899	1.1907	0.275188	0.915816	Unchanged
ENSG00000258738	lncRNA	novel transcript, antisense to BAZ1A	AL121603.2	0.0977527	3.34925	1.18884	0.275564	0.916071	Unchanged
ENSG00000275601	lncRNA	novel transcript, sense intronic to CATSPER2	AC011330.2	-0.530953	-1.30369	1.18277	0.276793	0.916516	Unchanged
ENSG00000226833	lncRNA	novel transcript	AC092164.1	-0.164618	1.61569	1.18329	0.276687	0.916516	Unchanged
ENSG00000226045	processed_pseudogene	glutamyl-tRNA(Gln) amidotransferase, subunit C homolog (bacterial)(GATC) pseudogene	AC234644.1	0.589452	-1.56475	1.18746	0.275842	0.916516	Unchanged
ENSG00000281538	lncRNA	novel transcript	AC254562.3	-0.643897	-1.82282	1.18344	0.276657	0.916516	Unchanged
ENSG00000236200	lncRNA	KDM4A antisense RNA 1 [Source:HGNC Symbol;Acc:HGNC:40528]	KDM4A-AS1	0.229996	1.07757	1.18322	0.276701	0.916516	Unchanged
ENSG00000263276	lncRNA	novel transcript	AC020978.7	-0.256746	0.487692	1.1821	0.27693	0.916621	Unchanged
ENSG00000237082	processed_pseudogene	cytochrome c oxidase subunit 5B pseudogene 6 [Source:HGNC Symbol;Acc:HGNC:2275]	COX5BP6	0.380222	-0.330133	1.18102	0.277148	0.916801	Unchanged
ENSG00000251595	transcribed_processed_pseudogene	ATP binding cassette subfamily A member 11, pseudogene [Source:HGNC Symbol;Acc:HGNC:31]	ABCA11P	0.1771	1.56824	1.18053	0.277247	0.916892	Unchanged
ENSG00000263165	lncRNA	novel transcript, antisense to ANKFY1	AC087292.1	0.473872	-1.41158	1.1791	0.277539	0.917157	Unchanged
ENSG00000230590	lncRNA	FTX transcript, XIST regulator [Source:HGNC Symbol;Acc:HGNC:37190]	FTX	0.107739	7.14835	1.17928	0.277502	0.917157	Unchanged
ENSG00000174028	processed_pseudogene	family with sequence similarity 3 member C2, pseudogene [Source:HGNC Symbol;Acc:HGNC:34501]	FAM3C2P	0.325611	0.332962	1.1786	0.277642	0.917344	Unchanged
ENSG00000261761	lncRNA	long intergenic non-protein coding RNA 2616 [Source:HGNC Symbol;Acc:HGNC:54078]	LINC02616	0.398133	-0.41117	1.17744	0.277878	0.91744	Unchanged
ENSG00000280132	TEC	novel transcript	AC026471.6	0.232754	0.706291	1.17633	0.278104	0.917499	Unchanged
ENSG00000254473	lncRNA	novel transcript, antisense to UBQLN1	AL354920.1	-0.28144	0.361706	1.17497	0.278382	0.917611	Unchanged
ENSG00000263843	lncRNA	MIF4GD divergent transcript [Source:HGNC Symbol;Acc:HGNC:55335]	AC022211.2	0.122202	2.55406	1.17402	0.278576	0.917784	Unchanged
ENSG00000271452	lncRNA	novel transcript, sense intronic to MRPL19	AC005034.5	0.218774	1.07978	1.17256	0.278875	0.918303	Unchanged
ENSG00000261275	lncRNA	novel transcript	AC092447.8	-0.661058	-1.70815	1.17152	0.27909	0.918404	Unchanged
ENSG00000253785	processed_pseudogene	pyrophosphatase (inorganic) 1 (PPA1) pseudogene	AC008429.2	0.52197	-1.33528	1.15349	0.28282	0.918563	Unchanged
ENSG00000275857	lncRNA	novel transcript, antisense to KIF22	AC009133.4	-0.546714	-1.41135	1.17045	0.279308	0.918563	Unchanged
ENSG00000270277	lncRNA	novel transcript, antisense to titin	AC009948.1	-0.162905	1.35861	1.1657	0.280286	0.918563	Unchanged
ENSG00000287900	lncRNA	novel transcript	AC061961.1	-0.645939	-1.79329	1.16896	0.279615	0.918563	Unchanged
ENSG00000267048	lncRNA	novel transcript (MC1R-TUBB3 readthrough)	AC092143.3	-0.453777	-0.979373	1.15361	0.282795	0.918563	Unchanged
ENSG00000286836	lncRNA	novel transcript	AC092844.1	0.441367	-1.27286	1.15603	0.28229	0.918563	Unchanged
ENSG00000261159	lncRNA	novel transcript	AC112484.3	0.210526	0.846278	1.15808	0.281864	0.918563	Unchanged
ENSG00000262358	lncRNA	Novel protein, antisense to ITGAE	AC116914.1	-0.555269	-1.61519	1.16034	0.281395	0.918563	Unchanged
ENSG00000228205	processed_pseudogene	ribosomal protein S3 (RPS3) pseudogene	AC131235.1	0.329365	-0.174918	1.16884	0.27964	0.918563	Unchanged
ENSG00000284657	lncRNA	novel transcript	AL031432.5	0.315109	-0.417383	1.16258	0.280931	0.918563	Unchanged
ENSG00000280231	TEC	tec	AL031719.2	0.583178	-1.41129	1.15729	0.282028	0.918563	Unchanged
ENSG00000269940	lncRNA	novel transcript, sense intronic to KLC1	AL049840.4	0.163402	2.21445	1.16131	0.281193	0.918563	Unchanged
ENSG00000234961	lncRNA	novel transcript	AL133415.1	0.48015	-1.10975	1.1641	0.280617	0.918563	Unchanged
ENSG00000224848	lncRNA	novel transcript	AL589843.1	0.210702	0.751361	1.16205	0.28104	0.918563	Unchanged
ENSG00000288538	lncRNA	novel transcript, antisense to KCTD21	AP002985.1	-0.23615	1.09359	1.1678	0.279853	0.918563	Unchanged
ENSG00000221953	lncRNA	chromosome 1 open reading frame 229 [Source:HGNC Symbol;Acc:HGNC:33759]	C1orf229	-0.202009	1.18259	1.1678	0.279854	0.918563	Unchanged
ENSG00000228624	lncRNA	HDAC2 and HS3ST5 antisense RNA 2 [Source:HGNC Symbol;Acc:HGNC:43590]	HDAC2-AS2	-0.183019	1.30051	1.15582	0.282335	0.918563	Unchanged
ENSG00000272701	lncRNA	MEST intronic transcript 1, antisense RNA [Source:HGNC Symbol;Acc:HGNC:17991]	MESTIT1	0.581474	-1.61534	1.15478	0.282551	0.918563	Unchanged
ENSG00000266852	miRNA	microRNA 4482 [Source:HGNC Symbol;Acc:HGNC:41792]	MIR4482	-0.582706	-1.73618	1.16044	0.281375	0.918563	Unchanged
ENSG00000213225	transcribed_processed_pseudogene	NOC2 like nucleolar associated transcriptional repressor pseudogene 1 [Source:HGNC Symbol;Acc:HGNC:52285]	NOC2LP1	0.517293	-1.48028	1.15956	0.281557	0.918563	Unchanged
ENSG00000257803	processed_pseudogene	phosphatidylinositol glycan anchor biosynthesis class A pseudogene 1 [Source:HGNC Symbol;Acc:HGNC:8958]	PIGAP1	-0.394268	-0.695202	1.15681	0.282128	0.918563	Unchanged
ENSG00000231503	processed_pseudogene	prothymosin alpha pseudogene 4 [Source:HGNC Symbol;Acc:HGNC:9627]	PTMAP4	0.137535	2.53766	1.16554	0.280319	0.918563	Unchanged
ENSG00000231788	processed_pseudogene	ribosomal protein L31 pseudogene 50 [Source:HGNC Symbol;Acc:HGNC:36799]	RPL31P50	0.704501	-1.80755	1.16992	0.279417	0.918563	Unchanged
ENSG00000254003	lncRNA	SRI antisense RNA 1 [Source:HGNC Symbol;Acc:HGNC:40564]	SRI-AS1	-0.53875	-1.26251	1.1598	0.281508	0.918563	Unchanged
ENSG00000234405	lncRNA	novel transcript	Z69733.1	-0.176594	1.43837	1.15622	0.282251	0.918563	Unchanged
ENSG00000260493	lncRNA	novel transcript, antisense to E2F5	AC011773.4	0.545516	-1.35652	1.15043	0.28346	0.919318	Unchanged
ENSG00000273308	lncRNA	novel transcript	AC024560.3	0.570138	-1.5279	1.14987	0.283577	0.919318	Unchanged
ENSG00000279757	TEC	novel transcript	AC132068.1	0.705113	-1.91476	1.15139	0.283257	0.919318	Unchanged
ENSG00000273763	transcribed_processed_pseudogene	marker of proliferation Ki-67 (MKI67) pseudogene	AC007318.1	0.223594	1.07322	1.14877	0.283806	0.919468	Unchanged
ENSG00000234134	lncRNA	novel transcript	AL158835.2	0.37766	-0.899288	1.14831	0.283904	0.919631	Unchanged
ENSG00000274918	lncRNA	novel transcript	AC116447.1	0.476023	-0.954814	1.14787	0.283996	0.91972	Unchanged
ENSG00000261754	lncRNA	novel transcript	AC008555.1	-0.122487	2.52533	1.14302	0.285016	0.920311	Unchanged
ENSG00000260917	lncRNA	novel transcript, overlapping to VTI1A	AL158212.3	0.0656502	4.79395	1.14363	0.284887	0.920311	Unchanged
ENSG00000228395	lncRNA	novel transcript	AL356481.1	0.215165	0.706409	1.14043	0.285562	0.920311	Unchanged
ENSG00000249395	lncRNA	cancer susceptibility 9 [Source:HGNC Symbol;Acc:HGNC:48906]	CASC9	0.131264	2.39822	1.14342	0.284931	0.920311	Unchanged
ENSG00000231162	processed_pseudogene	COX11 pseudogene 1 [Source:HGNC Symbol;Acc:HGNC:2262]	COX11P1	0.545577	-1.91517	1.14264	0.285094	0.920311	Unchanged
ENSG00000287329	lncRNA	novel transcript	FP326651.1	0.472095	-1.34605	1.14431	0.284744	0.920311	Unchanged
ENSG00000266777	transcribed_processed_pseudogene	SH3 domain containing GRB2 like 1, endophilin A2 pseudogene 1 [Source:HGNC Symbol;Acc:HGNC:10835]	SH3GL1P1	0.226596	1.15764	1.14381	0.284848	0.920311	Unchanged
ENSG00000273084	lncRNA	novel transcript	AC092171.5	0.364492	-0.223211	1.13876	0.285914	0.920506	Unchanged
ENSG00000232940	lncRNA	HLA complex group 25 [Source:HGNC Symbol;Acc:HGNC:20196]	HCG25	-0.184327	1.22443	1.13731	0.286221	0.920834	Unchanged
ENSG00000204706	lncRNA	MAMDC2 antisense RNA 1 [Source:HGNC Symbol;Acc:HGNC:48719]	MAMDC2-AS1	0.298251	-0.109875	1.13738	0.286206	0.920834	Unchanged
ENSG00000204054	lncRNA	long intergenic non-protein coding RNA 963 [Source:HGNC Symbol;Acc:HGNC:48716]	LINC00963	0.0903246	3.86029	1.13498	0.286715	0.921383	Unchanged
ENSG00000267632	lncRNA	novel transcript	AC067852.3	-0.15085	1.93559	1.13095	0.287573	0.921584	Unchanged
ENSG00000215388	processed_pseudogene	actin gamma 1 pseudogene 3 [Source:HGNC Symbol;Acc:HGNC:148]	ACTG1P3	0.473268	-1.11888	1.13323	0.287087	0.921584	Unchanged
ENSG00000231236	lncRNA	novel transcript	AP001605.1	-0.455602	-0.837749	1.13196	0.287358	0.921584	Unchanged
ENSG00000203865	lncRNA	ATP1A1 antisense RNA 1 [Source:HGNC Symbol;Acc:HGNC:28262]	ATP1A1-AS1	0.10984	2.87203	1.13285	0.287168	0.921584	Unchanged
ENSG00000231728	lncRNA	TMSB15B antisense RNA 1 [Source:HGNC Symbol;Acc:HGNC:53858]	TMSB15B-AS1	-0.162789	1.72122	1.13291	0.287156	0.921584	Unchanged
ENSG00000281207	lncRNA	SLFNL1 antisense RNA 1 [Source:HGNC Symbol;Acc:HGNC:44126]	SLFNL1-AS1	0.285852	0.472198	1.12974	0.287831	0.9216	Unchanged
ENSG00000243819	lncRNA	RNA, 7SL, cytoplasmic 832, pseudogene [Source:HGNC Symbol;Acc:HGNC:46848]	RN7SL832P	0.184598	1.27491	1.12904	0.28798	0.921724	Unchanged
ENSG00000233762	processed_pseudogene	ribosomal protein S15 pseudogene 4 [Source:HGNC Symbol;Acc:HGNC:35712]	RPS15P4	-0.277427	0.191868	1.12881	0.288029	0.921724	Unchanged
ENSG00000274015	lncRNA	novel transcript	AL136038.4	-0.267651	0.203227	1.12739	0.288332	0.921752	Unchanged
ENSG00000235298	lncRNA	novel transcript	AL354733.3	-0.584383	-1.62791	1.12752	0.288306	0.921752	Unchanged
ENSG00000215374	lncRNA	family with sequence similarity 66 member B [Source:HGNC Symbol;Acc:HGNC:28890]	FAM66B	0.431647	-0.988291	1.12823	0.288154	0.921752	Unchanged
ENSG00000262514	lncRNA	novel transcript	AC020978.6	-0.324945	-0.278036	1.12487	0.288872	0.922397	Unchanged
ENSG00000255390	lncRNA	DCHS1 antisense RNA 1 [Source:HGNC Symbol;Acc:HGNC:40650]	AC091564.4	-0.597688	-1.75012	1.11827	0.290292	0.922397	Unchanged
ENSG00000255224	lncRNA	TEC	AC109322.1	0.319796	-0.20331	1.11918	0.290095	0.922397	Unchanged
ENSG00000253223	processed_pseudogene	PRP3 pre-mRNA processing factor 3 homolog (S. cerevisiae) (PRPF3) pseudogene	AC110998.1	-0.607342	-1.65448	1.12287	0.289302	0.922397	Unchanged
ENSG00000287336	lncRNA	novel transcript, antisense to DNM3	AL137157.1	0.537883	-1.14636	1.12353	0.289161	0.922397	Unchanged
ENSG00000260645	lncRNA	novel transcript	AL359715.2	-0.159885	1.96186	1.1196	0.290004	0.922397	Unchanged
ENSG00000255142	lncRNA	novel transcript	AP006621.2	0.391563	-0.628505	1.12297	0.289279	0.922397	Unchanged
ENSG00000233680	processed_pseudogene	heterogeneous nuclear ribonucleoprotein A1 pseudogene 27 [Source:HGNC Symbol;Acc:HGNC:39545]	HNRNPA1P27	-0.684709	-1.97961	1.11751	0.290454	0.922397	Unchanged
ENSG00000233868	processed_pseudogene	LLPH pseudogene 3 [Source:HGNC Symbol;Acc:HGNC:54775]	LLPHP3	0.479703	-1.17472	1.1246	0.28893	0.922397	Unchanged
ENSG00000237973	unprocessed_pseudogene	MT-CO1 pseudogene 12 [Source:HGNC Symbol;Acc:HGNC:52014]	MTCO1P12	0.140446	2.51173	1.11902	0.29013	0.922397	Unchanged
ENSG00000224985	lncRNA	novel transcript	AL590714.1	-0.499778	-1.31385	1.11616	0.290746	0.92249	Unchanged
ENSG00000258824	lncRNA	novel transcript	AL122035.1	-0.183803	1.45952	1.11559	0.290869	0.922562	Unchanged
ENSG00000236255	lncRNA	novel transcript	AC009404.1	0.107221	2.90694	1.11499	0.291	0.922642	Unchanged
ENSG00000267868	lncRNA	novel transcript	AL356740.1	-0.183419	1.21872	1.11482	0.291037	0.922642	Unchanged
ENSG00000233836	transcribed_unprocessed_pseudogene	zinc finger protein 726 pseudogene 1	AC139769.1	-0.0836287	4.0014	1.1142	0.291172	0.922744	Unchanged
ENSG00000233926	lncRNA	novel transcript	AL591368.1	-0.55251	-1.49169	1.11305	0.291421	0.922744	Unchanged
ENSG00000264569	lncRNA	DCXR divergent transcript [Source:HGNC Symbol;Acc:HGNC:54083]	DCXR-DT	0.45302	-1.02157	1.11227	0.29159	0.922744	Unchanged
ENSG00000268996	lncRNA	MAN1B1 divergent transcript [Source:HGNC Symbol;Acc:HGNC:48715]	MAN1B1-DT	0.188734	1.0403	1.11269	0.291498	0.922744	Unchanged
ENSG00000255145	lncRNA	STX17 antisense RNA 1 [Source:HGNC Symbol;Acc:HGNC:51174]	STX17-AS1	-0.235631	0.852793	1.11195	0.291657	0.922796	Unchanged
ENSG00000272750	lncRNA	novel transcript, antisense to MIA3	AL592148.3	-0.150082	2.18712	1.11062	0.291947	0.922867	Unchanged
ENSG00000248015	lncRNA	novel transcript, antisense to NDUFS7	AC005329.1	-0.126141	2.53995	1.10774	0.292575	0.922958	Unchanged
ENSG00000278126	lncRNA	novel transcript	AC139768.1	0.218073	0.76983	1.10763	0.292597	0.922958	Unchanged
ENSG00000174403	lncRNA	MIR1-1HG antisense RNA 1 [Source:HGNC Symbol;Acc:HGNC:26393]	MIR1-1HG-AS1	0.347076	-0.174979	1.10759	0.292607	0.922958	Unchanged
ENSG00000272114	lncRNA	novel transcript, antisense to VEGFA	AL136131.3	0.451242	-1.30415	1.10629	0.29289	0.922962	Unchanged
ENSG00000239291	processed_pseudogene	ribosomal protein S2 (RPS2) pseudogene	AC002558.1	0.415548	-0.515723	1.10535	0.293095	0.92301	Unchanged
ENSG00000244701	lncRNA	novel transcript, antisense to AGK	AC004918.1	-0.195625	1.09114	1.10551	0.29306	0.92301	Unchanged
ENSG00000251634	unprocessed_pseudogene	NAIP pseudogene 4 [Source:HGNC Symbol;Acc:HGNC:54494]	NAIPP4	-0.271828	0.429206	1.10547	0.29307	0.92301	Unchanged
ENSG00000256588	lncRNA	novel transcript	AC027544.2	-0.531893	-1.56457	1.10362	0.293474	0.923435	Unchanged
ENSG00000257225	lncRNA	novel transcript, antisense to PRICKLE1	AC079601.1	0.247799	0.72714	1.10109	0.294027	0.923435	Unchanged
ENSG00000265401	lncRNA	novel transcript	AC093484.3	-0.215338	1.09986	1.10105	0.294036	0.923435	Unchanged
ENSG00000203804	lncRNA	ADAMTSL4 antisense RNA 1 [Source:HGNC Symbol;Acc:HGNC:32041]	ADAMTSL4-AS1	-0.280362	-0.00894827	1.10274	0.293665	0.923435	Unchanged
ENSG00000279670	TEC	TEC	AL359922.3	-0.261539	0.762983	1.1029	0.293631	0.923435	Unchanged
ENSG00000260671	lncRNA	novel transcript, sense intronic to KLHDC4	AC010536.2	0.308201	0.15124	1.09801	0.294702	0.923628	Unchanged
ENSG00000285870	lncRNA	novel transcript	AC012673.1	0.689452	-1.97961	1.09932	0.294415	0.923628	Unchanged
ENSG00000249572	lncRNA	novel transcript	AC034231.1	0.271735	0.131493	1.09961	0.294351	0.923628	Unchanged
ENSG00000267226	lncRNA	MALT1 antisense RNA 1 [Source:HGNC Symbol;Acc:HGNC:55306]	AC104971.1	0.536905	-1.60252	1.09618	0.295106	0.923977	Unchanged
ENSG00000249592	lncRNA	novel transcript, antisense to PCGF3	AC139887.2	0.107972	3.72106	1.09646	0.295044	0.923977	Unchanged
ENSG00000255487	lncRNA	novel transcript	AC087362.2	0.51835	-1.11868	1.09463	0.295447	0.923995	Unchanged
ENSG00000251521	transcribed_unprocessed_pseudogene	inositol monophosphatase 1 pseudogene 1 [Source:HGNC Symbol;Acc:HGNC:33956]	IMPA1P1	-0.53599	-1.85281	1.09504	0.295358	0.923995	Unchanged
ENSG00000203616	processed_pseudogene	ras homolog family member T1 pseudogene 2 [Source:HGNC Symbol;Acc:HGNC:37838]	RHOT1P2	-0.291083	0.0249735	1.09348	0.295701	0.924493	Unchanged
ENSG00000254577	lncRNA	novel transcript, sense overlapping TTC17	AC087276.1	0.381554	-0.891411	1.08982	0.296511	0.925359	Unchanged
ENSG00000279168	lncRNA	novel transcript, sense overlapping POLR2J2, UPK3BL and RASA4	AC105052.4	0.943463	-1.97954	1.09062	0.296333	0.925359	Unchanged
ENSG00000080947	transcribed_unprocessed_pseudogene	CROCC pseudogene 3 [Source:HGNC Symbol;Acc:HGNC:29405]	CROCCP3	-0.0648921	5.17561	1.09144	0.296152	0.925359	Unchanged
ENSG00000260153	processed_pseudogene	retinoic acid receptor responder 2 pseudogene 10 [Source:HGNC Symbol;Acc:HGNC:51742]	RARRES2P10	0.683062	-1.79325	1.09039	0.296385	0.925359	Unchanged
ENSG00000266236	lncRNA	NARF intronic transcript 1 [Source:HGNC Symbol;Acc:HGNC:43651]	NARF-IT1	0.2085	1.16808	1.08861	0.29678	0.925491	Unchanged
ENSG00000206601	snRNA	RNA, U6 small nuclear 431, pseudogene [Source:HGNC Symbol;Acc:HGNC:47394]	RNU6-431P	0.692484	-2.04737	1.08806	0.296901	0.925599	Unchanged
ENSG00000276445	lncRNA	novel transcript	AC005393.1	-0.496174	-1.32481	1.0777	0.299212	0.925619	Unchanged
ENSG00000268375	lncRNA	novel transcript, antisense to ACPT	AC010325.2	0.774476	-2.1005	1.07818	0.299104	0.925619	Unchanged
ENSG00000285669	lncRNA	novel transcript	AC026979.4	0.13139	2.65014	1.08527	0.297521	0.925619	Unchanged
ENSG00000276292	lncRNA	novel transcript, antisense to WSB2	AC131159.1	-0.418755	-0.875605	1.0843	0.297737	0.925619	Unchanged
ENSG00000279175	lncRNA	novel transcript, antisense to PARVB	AL033543.1	0.509816	-1.10993	1.08187	0.298279	0.925619	Unchanged
ENSG00000227388	lncRNA	novel transcript	AL133410.1	-0.132946	2.35172	1.08275	0.298084	0.925619	Unchanged
ENSG00000232110	lncRNA	novel transcript, antisense to LIPA	AL353751.1	0.263128	0.384553	1.07735	0.299291	0.925619	Unchanged
ENSG00000271833	lncRNA	novel transcript	AL445222.1	-0.185085	1.43438	1.08087	0.298502	0.925619	Unchanged
ENSG00000249493	unprocessed_pseudogene	ankyrin repeat domain 20 family member A18, pseudogene [Source:HGNC Symbol;Acc:HGNC:23756]	ANKRD20A18P	0.403685	-0.582835	1.07966	0.298775	0.925619	Unchanged
ENSG00000255847	lncRNA	novel transcript	AP003717.1	0.484047	-1.48041	1.08203	0.298245	0.925619	Unchanged
ENSG00000236088	lncRNA	COX10 antisense RNA 1 [Source:HGNC Symbol;Acc:HGNC:38873]	COX10-AS1	-0.0546971	5.22156	1.08318	0.297987	0.925619	Unchanged
ENSG00000180211	processed_pseudogene	pseudogene similar to part of ribosomal protein L23 RPL23	FO393411.1	0.341836	-0.267763	1.07682	0.299409	0.925619	Unchanged
ENSG00000259917	unprocessed_pseudogene	heterogeneous nuclear ribonucleoprotein L pseudogene 2 [Source:HGNC Symbol;Acc:HGNC:48747]	HNRNPLP2	-0.18863	1.28911	1.07757	0.299242	0.925619	Unchanged
ENSG00000229222	processed_pseudogene	keratin 18 pseudogene 4 [Source:HGNC Symbol;Acc:HGNC:16604]	KRT18P4	0.526872	-1.12761	1.07934	0.298846	0.925619	Unchanged
ENSG00000233621	lncRNA	long intergenic non-protein coding RNA 1137 [Source:HGNC Symbol;Acc:HGNC:49453]	LINC01137	-0.237091	0.866395	1.08096	0.298484	0.925619	Unchanged
ENSG00000236714	lncRNA	long intergenic non-protein coding RNA 1844 [Source:HGNC Symbol;Acc:HGNC:52660]	LINC01844	-0.265706	0.472752	1.08439	0.297717	0.925619	Unchanged
ENSG00000253200	lncRNA	novel transcript, antisense to KIAA1967	AC037459.2	-0.0985633	3.21558	1.07241	0.300401	0.925776	Unchanged
ENSG00000259363	lncRNA	novel transcript	AC090825.1	-0.149986	1.84143	1.07461	0.299907	0.925776	Unchanged
ENSG00000275964	lncRNA	novel transcript	AL355001.2	0.18131	1.61208	1.07391	0.300064	0.925776	Unchanged
ENSG00000230325	lncRNA	novel transcript	AL359921.1	-0.238496	0.355329	1.07	0.300946	0.925776	Unchanged
ENSG00000259865	lncRNA	novel transcript	AL390728.5	-0.105086	3.39302	1.06921	0.301124	0.925776	Unchanged
ENSG00000287624	lncRNA	novel transcript, antisense to PRCC	AL590666.5	-0.509577	-1.76445	1.06864	0.301252	0.925776	Unchanged
ENSG00000239218	transcribed_processed_pseudogene	ribosomal protein S20 pseudogene 22 [Source:HGNC Symbol;Acc:HGNC:36379]	RPS20P22	-0.228527	0.589245	1.07117	0.300682	0.925776	Unchanged
ENSG00000225345	transcribed_unprocessed_pseudogene	sorting nexin 18 pseudogene 3 [Source:HGNC Symbol;Acc:HGNC:39611]	SNX18P3	-0.23233	0.670092	1.07027	0.300885	0.925776	Unchanged
ENSG00000236869	lncRNA	ZKSCAN7 ZNF cluster antisense RNA 1 [Source:HGNC Symbol;Acc:HGNC:53964]	ZKSCAN7-AS1	0.661173	-1.76457	1.07118	0.300679	0.925776	Unchanged
ENSG00000272121	lncRNA	novel transcript	AC006058.3	-0.232672	0.475339	1.0555	0.304243	0.925788	Unchanged
ENSG00000279019	TEC	TEC	AC009090.4	-0.416119	-0.457017	1.06523	0.302026	0.925788	Unchanged
ENSG00000230732	lncRNA	novel transcript	AC016949.1	-0.14127	1.8424	1.05952	0.303324	0.925788	Unchanged
ENSG00000287448	lncRNA	novel transcript	AC018558.7	0.357074	-0.8759	1.05984	0.303252	0.925788	Unchanged
ENSG00000272103	lncRNA	novel transcript	AC026741.1	0.200434	0.793823	1.05615	0.304095	0.925788	Unchanged
ENSG00000267390	lncRNA	KDSR divergent transcript [Source:HGNC Symbol;Acc:HGNC:55299]	AC036176.1	0.235877	0.484612	1.06277	0.302584	0.925788	Unchanged
ENSG00000284634	lncRNA	novel transcript	AC092821.3	0.301028	-0.184299	1.05764	0.303754	0.925788	Unchanged
ENSG00000280069	TEC	TEC	AC127024.8	0.222266	1.58637	1.06647	0.301744	0.925788	Unchanged
ENSG00000288597	lncRNA	novel transcript	AC234782.2	0.195541	1.27866	1.05386	0.304619	0.925788	Unchanged
ENSG00000237017	lncRNA	novel transcript	AC245052.4	-0.413828	-0.595612	1.06317	0.302494	0.925788	Unchanged
ENSG00000279434	TEC	TEC	AL049776.1	-0.508579	-1.48005	1.0576	0.303763	0.925788	Unchanged
ENSG00000277831	lncRNA	novel transcript	AL138960.1	0.252623	0.400112	1.06301	0.30253	0.925788	Unchanged
ENSG00000260806	lncRNA	PAPOLA divergent transcript [Source:HGNC Symbol;Acc:HGNC:55380]	AL163051.1	-0.238619	0.596772	1.06109	0.302966	0.925788	Unchanged
ENSG00000237359	lncRNA	novel transcript	AL354977.2	-0.533416	-1.56452	1.0585	0.303558	0.925788	Unchanged
ENSG00000279878	TEC	novel transcript	AP003108.5	-0.412935	-0.845026	1.06056	0.303087	0.925788	Unchanged
ENSG00000227344	processed_pseudogene	HAUS augmin like complex subunit 6 pseudogene 1 [Source:HGNC Symbol;Acc:HGNC:43764]	HAUS6P1	-0.450992	-1.4115	1.06044	0.303115	0.925788	Unchanged
ENSG00000203809	lncRNA	LIN28B antisense RNA 1 [Source:HGNC Symbol;Acc:HGNC:21553]	LIN28B-AS1	0.190164	1.03309	1.05344	0.304715	0.925788	Unchanged
ENSG00000239351	processed_pseudogene	nucleophosmin 1 pseudogene 29 [Source:HGNC Symbol;Acc:HGNC:45208]	NPM1P29	0.375897	-0.891373	1.05507	0.304343	0.925788	Unchanged
ENSG00000234797	processed_pseudogene	RPS3A pseudogene 6 [Source:HGNC Symbol;Acc:HGNC:18630]	RPS3AP6	-0.148094	2.40181	1.05481	0.304401	0.925788	Unchanged
ENSG00000233381	processed_pseudogene	adenylate kinase 4 pseudogene 3 [Source:HGNC Symbol;Acc:HGNC:21596]	AK4P3	0.611121	-1.21283	1.05275	0.304875	0.92584	Unchanged
ENSG00000169253	processed_pseudogene	ribosomal protein L36 (RPL36) pseudogene	AL669983.1	0.335271	-0.615396	1.05283	0.304856	0.92584	Unchanged
ENSG00000183458	transcribed_unprocessed_pseudogene	polycystin 1, transient receptor potential channel interacting pseudogene 3 [Source:HGNC Symbol;Acc:HGNC:30067]	PKD1P3	0.173556	2.01192	1.05298	0.304822	0.92584	Unchanged
ENSG00000260653	lncRNA	novel transcript	AC237221.1	-0.530179	-1.45701	1.05085	0.305313	0.926302	Unchanged
ENSG00000232499	processed_pseudogene	heterogeneous nuclear ribonucleoprotein A3 (hnRNPA3) pseudogene	AL391058.1	-0.413244	-0.735941	1.04958	0.305604	0.926345	Unchanged
ENSG00000205464	transcribed_unitary_pseudogene	ATPase H+ transporting accessory protein 1 like [Source:HGNC Symbol;Acc:HGNC:28091]	ATP6AP1L	0.0823531	3.54905	1.04879	0.305786	0.926345	Unchanged
ENSG00000225591	processed_pseudogene	ribosomal protein S27 (metallopanstimulin 1) (RPS27) pseudogene	BX248409.1	0.503386	-1.18411	1.04751	0.306082	0.926473	Unchanged
ENSG00000261570	lncRNA	AGK divergent transcript [Source:HGNC Symbol;Acc:HGNC:55356]	AC073878.1	0.449439	-1.23273	1.0446	0.306755	0.927329	Unchanged
ENSG00000249096	lncRNA	long intergenic non-protein coding RNA 2362 [Source:HGNC Symbol;Acc:HGNC:53284]	LINC02362	-0.497669	-1.52771	1.04496	0.30667	0.927329	Unchanged
ENSG00000235748	processed_pseudogene	septin 14 pseudogene 12 [Source:HGNC Symbol;Acc:HGNC:51699]	SEPTIN14P12	-0.381759	-0.996768	1.04509	0.30664	0.927329	Unchanged
ENSG00000272056	lncRNA	novel transcript, antisense to AGBL5	AC013472.2	0.414957	-0.729082	1.04163	0.307442	0.927738	Unchanged
ENSG00000228653	processed_pseudogene	heterogeneous nuclear ribonucleoprotein C pseudogene 7 [Source:HGNC Symbol;Acc:HGNC:48818]	HNRNPCP7	-0.422235	-0.891337	1.04159	0.307452	0.927738	Unchanged
ENSG00000260633	lncRNA	novel transcript	AC010207.1	0.480154	-1.76461	1.0407	0.30766	0.92788	Unchanged
ENSG00000262902	processed_pseudogene	MT-CO1 pseudogene 40 [Source:HGNC Symbol;Acc:HGNC:52105]	MTCO1P40	0.302803	-0.0256323	1.039	0.308054	0.928258	Unchanged
ENSG00000273391	lncRNA	novel transcript, antisense to LUC7L2	AC083880.1	0.307454	-0.298571	1.03686	0.308553	0.92864	Unchanged
ENSG00000286732	lncRNA	novel transcript, antisense to MSI2	AC091181.2	0.220077	0.310904	1.03796	0.308295	0.92864	Unchanged
ENSG00000214273	processed_pseudogene	angiogenic factor with G-patch and FHA domains 1 pseudogene 1 [Source:HGNC Symbol;Acc:HGNC:38051]	AGGF1P1	0.387282	-0.622045	1.03806	0.308273	0.92864	Unchanged
ENSG00000215097	processed_pseudogene	dual specificity phosphatase 8 pseudogene 2	AL731733.1	0.425756	-1.17492	1.03647	0.308643	0.92864	Unchanged
ENSG00000259673	lncRNA	IQCH antisense RNA 1 [Source:HGNC Symbol;Acc:HGNC:44104]	IQCH-AS1	-0.121817	2.64968	1.03729	0.308453	0.92864	Unchanged
ENSG00000267454	lncRNA	ZNF582 divergent transcript [Source:HGNC Symbol;Acc:HGNC:25213]	ZNF582-AS1	0.238292	0.659301	1.03601	0.308752	0.92864	Unchanged
ENSG00000245205	processed_pseudogene	eukaryotic translation elongation factor 1 alpha 1 pseudogene 4 [Source:HGNC Symbol;Acc:HGNC:3199]	EEF1A1P4	-0.40895	-0.987877	1.03565	0.308835	0.928745	Unchanged
ENSG00000227962	processed_pseudogene	ubiquitin-conjugating enzyme E2G 1 (UBC7 homolog, C. elegans) (UBE2G10 pseudogene	AL391994.1	0.363894	-0.583499	1.03347	0.309344	0.929558	Unchanged
ENSG00000263823	lncRNA	novel transcript, antisense to KIAA1012	AC009831.1	-0.418866	-1.21311	1.02339	0.311717	0.930419	Unchanged
ENSG00000254966	lncRNA	novel transcript	AC103974.1	0.3585	-0.71563	1.02879	0.310444	0.930419	Unchanged
ENSG00000251216	lncRNA	novel transcript	AC106895.2	-0.0615282	4.88132	1.03057	0.310025	0.930419	Unchanged
ENSG00000279602	TEC	TEC	AC109326.1	0.204676	1.02419	1.02731	0.310791	0.930419	Unchanged
ENSG00000284738	lncRNA	novel transcript, antisense to DENND4B	AL358472.5	-0.400388	-1.16517	1.03126	0.309862	0.930419	Unchanged
ENSG00000272129	lncRNA	novel transcript	AL359715.3	0.301503	0.150979	1.02576	0.311158	0.930419	Unchanged
ENSG00000287315	lncRNA	novel transcript, antisense to OBSCN	AL670729.3	-0.408646	-1.44547	1.03049	0.310043	0.930419	Unchanged
ENSG00000257790	processed_pseudogene	eukaryotic translation initiation factor 4A1 pseudogene 4 [Source:HGNC Symbol;Acc:HGNC:37923]	EIF4A1P4	-0.385157	-0.971309	1.02556	0.311204	0.930419	Unchanged
ENSG00000088340	transcribed_unitary_pseudogene	fer-1 like family member 4 (pseudogene) [Source:HGNC Symbol;Acc:HGNC:15801]	FER1L4	0.200944	0.826733	1.02639	0.311008	0.930419	Unchanged
ENSG00000235660	lncRNA	long intergenic non-protein coding RNA 345 [Source:HGNC Symbol;Acc:HGNC:42503]	LINC00345	-0.513582	-1.76446	1.0254	0.31124	0.930419	Unchanged
ENSG00000227001	unprocessed_pseudogene	NBPF member 2, pseudogene [Source:HGNC Symbol;Acc:HGNC:31987]	NBPF2P	-0.327189	-0.288097	1.02556	0.311203	0.930419	Unchanged
ENSG00000162913	lncRNA	OBSCN antisense RNA 1 [Source:HGNC Symbol;Acc:HGNC:32047]	OBSCN-AS1	-0.139883	1.69166	1.02574	0.311161	0.930419	Unchanged
ENSG00000214455	processed_pseudogene	reticulocalbin 1 pseudogene 2 [Source:HGNC Symbol;Acc:HGNC:39204]	RCN1P2	0.11688	2.7533	1.02383	0.311613	0.930419	Unchanged
ENSG00000199237	snRNA	RNA, U6 small nuclear 834, pseudogene [Source:HGNC Symbol;Acc:HGNC:47797]	RNU6-834P	-0.291397	-0.056287	1.02819	0.310585	0.930419	Unchanged
ENSG00000243964	processed_pseudogene	ribosomal protein L23a pseudogene 65 [Source:HGNC Symbol;Acc:HGNC:36289]	RPL23AP65	0.376488	-0.457126	1.02417	0.311532	0.930419	Unchanged
ENSG00000261659	lncRNA	novel transcript, antisense to FBXL16	Z92544.1	-0.15425	2.16558	1.02896	0.310404	0.930419	Unchanged
ENSG00000250770	transcribed_unprocessed_pseudogene	tetraspanin 11 (TSPAN11) pseudogene	AC005865.1	-0.184877	0.952172	1.02168	0.31212	0.93049	Unchanged
ENSG00000278492	lncRNA	novel transcript, sense intronic to ZNF155	AC006213.5	-0.310868	-0.462414	1.02058	0.312381	0.93049	Unchanged
ENSG00000259877	lncRNA	novel transcript, antisense to ZNF778	AC009113.1	0.0859863	3.20944	1.01314	0.314151	0.93049	Unchanged
ENSG00000276670	misc_RNA		AC012354.6	-0.731417	-1.99623	1.01218	0.314382	0.93049	Unchanged
ENSG00000286986	lncRNA	novel transcript	AC026736.1	-0.371875	-0.922763	1.02245	0.311938	0.93049	Unchanged
ENSG00000271848	lncRNA	SYNPO2L antisense RNA 1 [Source:HGNC Symbol;Acc:HGNC:55242]	AC073389.2	0.193598	0.483227	1.01334	0.314104	0.93049	Unchanged
ENSG00000246250	lncRNA	novel transcript	AC087521.2	0.534569	-1.80802	1.01714	0.313199	0.93049	Unchanged
ENSG00000240036	processed_pseudogene	novel pseudogene	AC104563.1	0.49466	-1.42264	1.01415	0.313911	0.93049	Unchanged
ENSG00000287088	lncRNA	novel transcript, antisense to TSPEAR	AP001066.1	0.272826	-0.609766	1.01554	0.31358	0.93049	Unchanged
ENSG00000253669	lncRNA	growth arrest associated lncRNA 1 [Source:HGNC Symbol;Acc:HGNC:53461]	GASAL1	0.348049	-0.558396	1.0176	0.313089	0.93049	Unchanged
ENSG00000213569	processed_pseudogene	GTF3C6 pseudogene 2 [Source:HGNC Symbol;Acc:HGNC:55024]	GTF3C6P2	0.617027	-1.72226	1.01365	0.314029	0.93049	Unchanged
ENSG00000230267	transcribed_unprocessed_pseudogene	hect domain and RLD 2 pseudogene 4 [Source:HGNC Symbol;Acc:HGNC:4872]	HERC2P4	-0.149147	1.79743	1.01478	0.313761	0.93049	Unchanged
ENSG00000270441	unprocessed_pseudogene	laminin subunit beta 2 pseudogene 1 [Source:HGNC Symbol;Acc:HGNC:6488]	LAMB2P1	-0.22076	0.916914	1.01455	0.313816	0.93049	Unchanged
ENSG00000204650	transcribed_unitary_pseudogene	long intergenic non-protein coding RNA 2210 [Source:HGNC Symbol;Acc:HGNC:26327]	LINC02210	-0.0515288	5.60662	1.01666	0.313313	0.93049	Unchanged
ENSG00000236411	processed_pseudogene	NADH:ubiquinone oxidoreductase complex assembly factor 4 pseudogene 3 [Source:HGNC Symbol;Acc:HGNC:44542]	NDUFAF4P3	-0.355291	-0.76469	1.02004	0.31251	0.93049	Unchanged
ENSG00000266066	processed_pseudogene	RNA polymerase mitochondrial pseudogene 1 [Source:HGNC Symbol;Acc:HGNC:28865]	POLRMTP1	0.221231	0.830858	1.01675	0.313292	0.93049	Unchanged
ENSG00000222515	misc_RNA	RN7SK pseudogene 240 [Source:HGNC Symbol;Acc:HGNC:45964]	RN7SKP240	0.456916	-1.54012	1.02016	0.312481	0.93049	Unchanged
ENSG00000223198	snRNA	RNA, U2 small nuclear 22, pseudogene [Source:HGNC Symbol;Acc:HGNC:48515]	RNU2-22P	0.414415	-0.715531	1.0122	0.314376	0.93049	Unchanged
ENSG00000196756	lncRNA	small nucleolar RNA host gene 17 [Source:HGNC Symbol;Acc:HGNC:48600]	SNHG17	0.0628527	4.91848	1.01703	0.313225	0.93049	Unchanged
ENSG00000280213	lncRNA	UCKL1 antisense RNA 1 [Source:HGNC Symbol;Acc:HGNC:31967]	UCKL1-AS1	-0.488344	-1.18402	1.01483	0.313747	0.93049	Unchanged
ENSG00000281501	lncRNA	SEPSECS antisense RNA 1 (head to head) [Source:HGNC Symbol;Acc:HGNC:27737]	SEPSECS-AS1	-0.164215	1.69936	1.01131	0.314589	0.930919	Unchanged
ENSG00000253347	lncRNA	novel transcript	AC040934.1	-0.2939	-0.113644	1.0059	0.315888	0.930972	Unchanged
ENSG00000286791	lncRNA	novel transcript	AC079949.5	-0.288024	-0.0783582	1.00852	0.315257	0.930972	Unchanged
ENSG00000240731	lncRNA	novel transcript	AL139287.1	0.174125	1.38585	1.00568	0.31594	0.930972	Unchanged
ENSG00000260942	lncRNA	CAPN10 divergent transcript [Source:HGNC Symbol;Acc:HGNC:48839]	CAPN10-DT	0.107667	2.49403	1.00598	0.315868	0.930972	Unchanged
ENSG00000235885	lncRNA	long intergenic non-protein coding RNA 1828 [Source:HGNC Symbol;Acc:HGNC:52634]	LINC01828	0.169341	1.29757	1.00988	0.314933	0.930972	Unchanged
ENSG00000267023	transcribed_unprocessed_pseudogene	leucine rich repeat containing 37 member A16, pseudogene [Source:HGNC Symbol;Acc:HGNC:43820]	LRRC37A16P	-0.443285	-1.49192	1.00743	0.315519	0.930972	Unchanged
[truncated: 3,851 more rows]
