# Supplementary material for: Oxidative Stress and Its Modulation by Ladostigil Alter the Expression of Abundant Long Non-Coding RNAs in SH-SY5Y Cells
Source: Noncoding RNA. 2022 Oct 25;8(6):72. doi: 10.3390/ncrna8060072 (PMC9680243; doi:10.3390/ncrna8060072)
Supplement: Supplementary file 1 [file ncrna-08-00072-s001.zip › SH-ncRNA-Suppl Table S3- (780).xlsx]

## Sheet: Sheet1
Table S3. ncRNA collection of 780 significant genes fron DE of Sin1 vs NT cells (24 hrs)
ensemblID	Description	Gene_type	gene_name	logFC	logCPM	LR	PValue	FDR	Trend	FC
ENSG00000268895	lncRNA	A1BG antisense RNA 1 [Source:HGNC Symbol;Acc:HGNC:37133]	A1BG-AS1	-0.0846924	2.88294	0.601757	0.437908	0.548468	Unchanged	0.942986
ENSG00000280347	TEC	TEC	AC000123.3	0.17869	4.64781	1.6019	0.205634	0.301708	Unchanged	1.13186
ENSG00000258240	lncRNA	novel transcript	AC002351.1	0.119805	2.50785	0.628344	0.427963	0.53893	Unchanged	1.08659
ENSG00000276449	lncRNA	novel transcript	AC004076.2	0.10785	2.59804	0.772346	0.379492	0.489829	Unchanged	1.07762
ENSG00000214870	lncRNA	novel transcript	AC004540.1	0.100816	3.15687	1.02415	0.311537	0.418512	Unchanged	1.07238
ENSG00000250132	lncRNA	novel transcript	AC004803.1	0.275268	3.44625	9.30417	0.00228633	0.00669548	Unchanged	1.21022
ENSG00000277283	lncRNA	novel transcript, antisense to RAB35	AC004812.2	0.207801	2.58105	2.32753	0.127103	0.205164	Unchanged	1.15493
ENSG00000259768	lncRNA	novel transcript, antisense to ZFHX3	AC004943.2	-0.088211	4.48284	1.5058	0.219781	0.318154	Unchanged	0.940689
ENSG00000285725	lncRNA	novel transcript	AC004967.2	0.253186	2.45286	2.47327	0.115797	0.19016	Unchanged	1.19184
ENSG00000205485	transcribed_unprocessed_pseudogene	pseudogene similar to part of postmeiotic segregation increased 2-like 3 PMS2L3	AC004980.1	0.138939	3.10829	1.66826	0.196492	0.290835	Unchanged	1.10109
ENSG00000273314	lncRNA	novel transcript, antisense to CUL1	AC005229.3	0.175228	2.65328	2.00569	0.15671	0.243361	Unchanged	1.12914
ENSG00000268205	lncRNA	novel transcript	AC005261.1	-0.24331	4.50038	2.70406	0.100093	0.168808	Unchanged	0.844805
ENSG00000251393	lncRNA	novel transcript, antisense to NUMB and HEATR4	AC005280.1	-0.0874877	3.23239	0.85976	0.353806	0.462691	Unchanged	0.94116
ENSG00000248015	lncRNA	novel transcript, antisense to NDUFS7	AC005329.1	-0.114994	2.54095	0.885781	0.346623	0.455301	Unchanged	0.923386
ENSG00000274561	lncRNA	novel transcript	AC005332.3	-0.0617024	3.33861	0.403472	0.525302	0.630863	Unchanged	0.958133
ENSG00000277476	lncRNA	novel transcript	AC005332.5	-0.207641	4.32867	10.1176	0.00146861	0.00453216	Unchanged	0.865952
ENSG00000278730	lncRNA	novel transcript	AC005332.6	0.102125	6.83299	7.54087	0.00603149	0.0156325	Unchanged	1.07335
ENSG00000262879	lncRNA	novel transcript	AC005670.3	0.0496029	6.1174	1.44371	0.229541	0.329279	Unchanged	1.03498
ENSG00000277200	lncRNA	novel transcript	AC005696.4	0.074365	4.23179	1.01334	0.314103	0.421224	Unchanged	1.0529
ENSG00000279089	TEC	TEC	AC005839.1	0.318973	3.17898	6.81847	0.00902197	0.0220861	Up	1.24744
ENSG00000229180	transcribed_unprocessed_pseudogene	RAB guanine nucleotide exchange factor (GEF) 1 (RABGEF1) pseudogene	AC006001.3	-0.139131	4.71979	4.02061	0.0449474	0.0866063	Unchanged	0.908066
ENSG00000233264	processed_pseudogene	peptidylprolyl isomerase (cyclophilin)-like 4 (PPIL4) pseudogene	AC006042.2	1.21651	2.49021	27.2623	1.77639e-07	1.2408e-06	Up	2.32384
ENSG00000261786	lncRNA	novel transcript	AC006058.1	-0.227073	4.23065	10.3945	0.00126391	0.00396377	Unchanged	0.854367
ENSG00000269968	lncRNA	novel transcript, antisense to GAPDH	AC006064.4	0.631414	3.3847	8.74529	0.00310402	0.00872409	Up	1.54908
ENSG00000242593	lncRNA	novel transcript	AC006148.1	-0.259151	3.72406	8.34673	0.00386383	0.0106049	Unchanged	0.83558
ENSG00000256417	lncRNA	novel transcript	AC006206.2	0.539016	2.17459	16.0557	6.15053e-05	0.000265348	Up	1.45298
ENSG00000267575	lncRNA	novel transcript	AC006504.5	-0.110967	4.01899	1.90833	0.167149	0.256411	Unchanged	0.925967
ENSG00000235859	processed_pseudogene	proteasome (prosome, macropain) 26S subunit, ATPase, 5 (PSMC5) pseudogene	AC006978.1	0.275052	2.9671	4.95498	0.0260156	0.0545723	Unchanged	1.21004
ENSG00000261094	lncRNA	novel transcript	AC007066.2	0.122831	2.33521	0.835386	0.36072	0.469718	Unchanged	1.08887
ENSG00000231609	lncRNA	novel transcript, antisense to EHBP1	AC007098.1	-0.0647698	2.49759	0.260586	0.609718	0.702717	Unchanged	0.956098
ENSG00000279407	TEC	TEC	AC007191.1	0.131584	2.22944	0.65504	0.418317	0.529545	Unchanged	1.0955
ENSG00000272054	lncRNA	novel transcript	AC007390.1	0.0739906	2.22227	0.296811	0.585889	0.683576	Unchanged	1.05262
ENSG00000261799	lncRNA	novel transcript	AC007406.4	-0.0140501	4.30418	0.0369191	0.84763	0.892605	Unchanged	0.990308
ENSG00000279059	TEC	TEC	AC007485.2	-0.17291	3.96222	3.98883	0.0458027	0.0879669	Unchanged	0.887052
ENSG00000244055	lncRNA	novel transcript, antisense to ERVW-1 and PEX1	AC007566.1	0.0878603	3.81849	0.976129	0.323156	0.430724	Unchanged	1.06279
ENSG00000269069	processed_pseudogene	protein associated with topoisomerase II homolog 1 (yeast) (PATL1) pseudogene	AC007842.1	0.338582	3.38814	11.4772	0.000704541	0.00236233	Up	1.26451
ENSG00000277534	lncRNA	novel transcript, sense intronic to KCTD1	AC007996.1	0.187101	2.66015	2.37306	0.123445	0.200459	Unchanged	1.13847
ENSG00000283041	processed_pseudogene	eukaryotic translation elongation factor 1 gamma (	AC008038.1	0.315103	2.89069	7.32162	0.006813	0.0173438	Up	1.2441
ENSG00000273015	lncRNA	novel transcript	AC008124.1	0.1663	4.69618	7.91642	0.0048988	0.013056	Unchanged	1.12218
ENSG00000248103	lncRNA	novel transcript	AC008443.2	0.101315	2.84689	0.418779	0.517547	0.624007	Unchanged	1.07275
ENSG00000261754	lncRNA	novel transcript	AC008555.1	0.338345	2.5265	7.31503	0.00683803	0.0174034	Up	1.26431
ENSG00000249042	lncRNA	novel transcript	AC008771.1	0.165529	3.95056	4.12662	0.0422137	0.0821034	Unchanged	1.12158
ENSG00000176593	lncRNA	novel transcript, antisense to ZNF606	AC008969.1	0.274739	4.13124	10.7723	0.0010303	0.00330725	Unchanged	1.20977
ENSG00000214331	transcribed_unprocessed_pseudogene	pyruvate dehydrogenase phosphatase regulatory subunit 2, pseudogene [Source:HGNC Symbol;Acc:HGNC:27556]	AC009053.1	0.0476783	3.20437	0.167147	0.68266	0.764306	Unchanged	1.0336
ENSG00000270049	lncRNA	ATP6V0D1 divergent transcript [Source:HGNC Symbol;Acc:HGNC:55268]	AC009061.2	0.294891	3.08004	7.16038	0.00745313	0.0187632	Unchanged	1.22679
ENSG00000259877	lncRNA	novel transcript, antisense to ZNF778	AC009113.1	0.213146	3.21072	5.34146	0.020824	0.0450906	Unchanged	1.15921
ENSG00000259972	lncRNA	novel transcript, antisense to PSMD7	AC009120.2	-0.0582249	4.37121	0.472847	0.49168	0.60057	Unchanged	0.960445
ENSG00000273297	lncRNA	novel transcript	AC009275.1	0.236531	3.14613	5.90491	0.0150988	0.0343202	Unchanged	1.17816
ENSG00000236255	lncRNA	novel transcript	AC009404.1	0.00896406	2.90806	0.00683551	0.934108	0.953528	Unchanged	1.00623
ENSG00000111788	unprocessed_pseudogene	DEAD/H (Asp-Glu-Ala-Asp/His) box polypeptide like pseudogene	AC009533.1	0.102243	3.82336	0.908923	0.3404	0.449062	Unchanged	1.07344
ENSG00000257027	lncRNA	novel transcript	AC010186.3	0.353333	2.66709	6.96795	0.00829827	0.0205252	Up	1.27751
ENSG00000271327	lncRNA	novel transcript	AC010201.2	0.460611	2.38545	11.8299	0.000582856	0.0019959	Up	1.37612
ENSG00000259663	lncRNA	novel transcript, antisense to ISL1	AC010478.1	0.0802672	6.69191	2.54428	0.110694	0.183108	Unchanged	1.05721
ENSG00000213976	unprocessed_pseudogene	zinc finger protein pseudogene	AC010615.1	-0.109169	2.35987	0.60694	0.435942	0.546839	Unchanged	0.927122
ENSG00000268119	lncRNA	novel transcript	AC010615.2	-0.0649372	5.16975	1.15956	0.281558	0.387309	Unchanged	0.955987
ENSG00000283103	lncRNA	novel transcript, antisense to ERVK3-1	AC010642.2	0.254707	2.87875	3.81125	0.0509093	0.0961123	Unchanged	1.19309
ENSG00000248540	lncRNA	novel transcript	AC010931.1	-0.540596	5.12338	88.7421	4.49788e-21	1.52849e-19	Down	0.687487
ENSG00000269973	lncRNA	novel transcript	AC010969.2	-0.150179	3.5832	3.47455	0.0623196	0.113887	Unchanged	0.901139
ENSG00000280294	TEC	TEC	AC011008.2	-0.0407232	2.74058	0.118246	0.730944	0.804462	Unchanged	0.972167
ENSG00000267383	lncRNA	novel transcript, antisense to ZNF486 and ZNF90	AC011447.3	-0.294204	3.2491	4.64391	0.031164	0.0636462	Unchanged	0.815522
ENSG00000280079	TEC	TEC	AC011447.7	-0.222894	3.87028	5.84082	0.0156586	0.0353775	Unchanged	0.856845
ENSG00000280239	TEC	TEC	AC011498.7	-0.205256	2.68856	2.90799	0.0881417	0.151811	Unchanged	0.867385
ENSG00000269397	lncRNA	novel transcript, sense intronic to ZNF726	AC011503.2	-0.124517	2.6276	0.956595	0.328046	0.43594	Unchanged	0.917311
ENSG00000280061	TEC	TEC	AC011504.1	0.39248	2.33858	8.76257	0.00307475	0.00865862	Up	1.31265
ENSG00000271936	lncRNA	novel transcript, antisense to ADCY3	AC012073.1	-0.174771	2.94326	1.71086	0.190874	0.284409	Unchanged	0.885908
ENSG00000232098	lncRNA	novel transcript	AC012313.1	-0.0790698	2.99567	0.535057	0.464489	0.574439	Unchanged	0.946668
ENSG00000268912	lncRNA	novel transcript	AC012313.5	-0.0651349	2.75993	0.264669	0.606931	0.700579	Unchanged	0.955856
ENSG00000225156	lncRNA	novel transcript	AC012354.1	0.361602	5.03141	35.7635	2.22786e-09	2.05709e-08	Up	1.28485
ENSG00000271976	lncRNA	novel transcript, antisense to IL17RB	AC012467.2	-0.267786	3.45176	7.55686	0.00597822	0.0155187	Unchanged	0.830593
ENSG00000279348	TEC	TEC	AC012513.3	-0.172126	5.60964	9.31698	0.0022704	0.00665723	Unchanged	0.887534
ENSG00000259583	lncRNA	novel transcript, antisense to LRRK1 and ALDH1A3	AC015712.2	0.262014	2.33593	3.87473	0.0490182	0.0933328	Unchanged	1.19915
ENSG00000264112	lncRNA	novel transcript	AC015813.1	0.434277	4.99167	29.4771	5.65826e-08	4.26042e-07	Up	1.35123
ENSG00000279069	TEC	novel transcript	AC015813.5	0.0406713	2.87348	0.121566	0.727342	0.801373	Unchanged	1.02859
ENSG00000279207	TEC	novel transcript	AC015813.6	-0.198314	5.93788	17.0377	3.66454e-05	0.000166659	Unchanged	0.871568
ENSG00000278600	lncRNA	novel transcript, sense intronic to ST20	AC015871.3	0.407566	3.09499	14.9573	0.000109971	0.000447768	Up	1.32645
ENSG00000288559	lncRNA	novel transcript	AC016394.2	-0.184623	3.33537	4.21088	0.0401655	0.0785947	Unchanged	0.879879
ENSG00000259495	lncRNA	novel transcript	AC016705.2	-0.0235188	4.69291	0.158067	0.690943	0.771427	Unchanged	0.98383
ENSG00000273301	lncRNA	novel transcript	AC016717.2	0.7874	3.38277	60.0566	9.21693e-15	1.75957e-13	Up	1.72596
ENSG00000212978	lncRNA	novel transcript	AC016747.1	-0.0174865	3.22567	0.033591	0.85458	0.897649	Unchanged	0.987952
ENSG00000230715	processed_pseudogene	novel pseudogene	AC018638.2	0.128625	2.77493	1.36222	0.243152	0.34492	Unchanged	1.09325
ENSG00000243302	processed_pseudogene	novel pseudogene	AC018638.4	0.151454	3.69586	2.91931	0.0875253	0.150907	Unchanged	1.11069
ENSG00000243679	processed_pseudogene	novel pseudogene	AC018638.5	0.0300374	3.12359	0.0726063	0.787579	0.848737	Unchanged	1.02104
ENSG00000271122	lncRNA	HERPUD2 antisense RNA 1 [Source:HGNC Symbol;Acc:HGNC:55258]	AC018647.2	0.203354	5.67583	14.3784	0.000149511	0.000590703	Unchanged	1.15137
ENSG00000213963	lncRNA	novel transcript	AC019080.1	-0.0766613	2.62994	0.25634	0.612646	0.705349	Unchanged	0.94825
ENSG00000229852	lncRNA	novel transcript, antisense to KHDC1	AC019205.1	-0.375394	4.39559	22.472	2.13225e-06	1.23813e-05	Down	0.770895
ENSG00000268516	lncRNA	ZNF8 divergent transcript [Source:HGNC Symbol;Acc:HGNC:55280]	AC020915.2	0.170609	2.37691	1.87034	0.171436	0.261705	Unchanged	1.12553
ENSG00000267260	lncRNA	novel transcript	AC020928.1	-0.178698	2.63026	2.00062	0.157235	0.24398	Unchanged	0.8835
ENSG00000278897	TEC	TEC	AC020951.1	0.141937	2.88666	1.48263	0.223364	0.322093	Unchanged	1.10339
ENSG00000230551	lncRNA	novel transcript	AC021078.1	-0.0389084	5.02062	0.332376	0.564264	0.66599	Unchanged	0.973391
ENSG00000186019	lncRNA	novel transcript, antisense to ZNF225 and ZNF224	AC021092.1	-0.326413	2.66559	8.23765	0.00410302	0.0111741	Down	0.797517
ENSG00000280187	TEC	TEC	AC022107.1	0.006541	2.8518	0.00307766	0.955759	0.969225	Unchanged	1.00454
ENSG00000263786	lncRNA	novel transcript, sense intronic to HN1	AC022211.1	0.40751	3.52023	10.5654	0.00115222	0.00365306	Up	1.32639
ENSG00000263843	lncRNA	MIF4GD divergent transcript [Source:HGNC Symbol;Acc:HGNC:55335]	AC022211.2	0.389343	2.5554	9.33146	0.00225253	0.00661152	Up	1.3098
ENSG00000269954	lncRNA	novel transcript, antisense to BLK	AC022239.1	-0.140805	3.87116	1.48053	0.223691	0.322449	Unchanged	0.907013
ENSG00000279088	TEC	TEC	AC022400.6	0.456654	2.63548	14.1719	0.00016684	0.000650737	Up	1.37235
ENSG00000288035	lncRNA	novel transcript	AC022433.1	0.593285	3.71012	30.3797	3.55227e-08	2.75711e-07	Up	1.50868
ENSG00000250979	unprocessed_pseudogene	transient receptor potential cation channel, subfamily A, member 1 (TRPA1) pseudogene	AC022905.1	0.433912	6.24882	75.5743	3.51916e-18	9.48372e-17	Up	1.35089
ENSG00000259488	lncRNA	novel transcript, antisense to DUT	AC023355.1	0.217178	2.88763	4.0046	0.0453762	0.0872794	Unchanged	1.16246
ENSG00000280180	TEC	novel transcript	AC023824.6	0.315647	2.99054	8.2203	0.00414244	0.0112709	Up	1.24457
ENSG00000269044	lncRNA	novel transcript, sense intronic C19orf42	AC024075.2	0.327374	3.3148	9.05325	0.00262228	0.00753086	Up	1.25473
ENSG00000285804	lncRNA	novel transcript	AC025774.1	0.519606	3.27706	26.1716	3.12389e-07	2.10341e-06	Up	1.43356
ENSG00000274964	lncRNA	novel transcript, sense intronic to BICD1	AC026356.1	0.440493	2.22701	9.24651	0.00235945	0.00689393	Up	1.35707
ENSG00000280206	lncRNA	novel transcript	AC026401.3	0.37343	3.49557	19.3076	1.11264e-05	5.61552e-05	Up	1.29543
ENSG00000188002	transcribed_unprocessed_pseudogene	programmed cell death 6 (PDCD6) pseudogene	AC026412.1	-0.023359	3.26616	0.0683024	0.793825	0.853166	Unchanged	0.983939
ENSG00000260267	lncRNA	novel transcript, antisense to ARMC5	AC026471.1	0.28556	4.10237	14.9655	0.000109495	0.000445985	Unchanged	1.21888
ENSG00000286388	lncRNA	novel transcript	AC026748.3	0.236345	3.39913	5.6894	0.0170677	0.0380055	Unchanged	1.178
ENSG00000285669	lncRNA	novel transcript	AC026979.4	-0.228383	2.65121	2.95721	0.0854956	0.147913	Unchanged	0.853591
ENSG00000267787	lncRNA	novel transcript, antisense to ATP8B1	AC027097.2	0.225342	3.5842	4.59314	0.0321002	0.0653279	Unchanged	1.16905
ENSG00000261762	lncRNA	novel transcript, antisense to CHRNA5	AC027228.2	-0.591719	3.81712	41.5691	1.13775e-10	1.28878e-09	Down	0.663552
ENSG00000280138	TEC	novel transcript	AC027290.2	0.303027	3.38581	2.15712	0.14191	0.224374	Unchanged	1.23373
ENSG00000287431	lncRNA	regulator of early neurogenesis 1 [Source:HGNC Symbol;Acc:HGNC:54096]	AC027601.5	0.230907	4.31199	10.3641	0.00128488	0.00401975	Unchanged	1.17357
ENSG00000272831	lncRNA	novel transcript, antisense to RABGEF1	AC027644.3	0.0521674	2.47336	0.167767	0.682104	0.763988	Unchanged	1.03682
ENSG00000253200	lncRNA	novel transcript, antisense to KIAA1967	AC037459.2	0.105883	3.2166	1.11979	0.289963	0.396331	Unchanged	1.07615
ENSG00000248932	lncRNA	novel transcript, antisense to RBP2, RBP1 & NMNAT3	AC046134.2	0.233521	3.8447	7.61133	0.00580028	0.0151212	Unchanged	1.1757
ENSG00000279369	TEC	TEC	AC046185.3	0.0807752	3.89681	0.907144	0.340873	0.449328	Unchanged	1.05759
ENSG00000257354	lncRNA	novel transcript	AC048341.1	0.314209	3.19835	8.78991	0.00302901	0.00855058	Up	1.24333
ENSG00000278864	TEC	novel transcript	AC055811.4	-0.249706	4.23353	8.34678	0.00386372	0.0106049	Unchanged	0.841068
ENSG00000267002	lncRNA	novel transcript	AC060780.1	0.142861	5.18593	4.94426	0.0261775	0.0548544	Unchanged	1.10409
ENSG00000279146	TEC	novel transcript	AC063926.2	-0.30217	2.70442	3.83539	0.0501814	0.0950089	Unchanged	0.811032
ENSG00000228801	lncRNA	novel transcript	AC064807.1	0.0891303	3.44394	0.628426	0.427933	0.53893	Unchanged	1.06373
ENSG00000272631	lncRNA	novel transcript, antisense to BMPR1A	AC067750.1	0.336459	2.9098	6.388	0.0114894	0.0271768	Up	1.26265
ENSG00000266962	lncRNA	HSD17B1 antisense RNA 1 [Source:HGNC Symbol;Acc:HGNC:55314]	AC067852.2	0.0377741	4.26594	0.279988	0.596709	0.692644	Unchanged	1.02653
ENSG00000274828	lncRNA	novel transcript	AC068473.5	0.262313	3.25937	7.53326	0.00605701	0.0156881	Unchanged	1.1994
ENSG00000257337	lncRNA	novel transcript, antisense to TENC1 & EIF4B	AC068888.1	0.507434	2.7514	17.9532	2.26408e-05	0.000107349	Up	1.42152
ENSG00000241634	processed_pseudogene	ribosomal protein L13 (RPL13) pseudogene	AC069499.1	-0.000765197	3.31582	6.55132e-05	0.993542	0.996379	Unchanged	0.99947
ENSG00000272604	lncRNA	novel transcript, antisense to EFCAB10	AC073073.2	-0.305441	2.81769	7.02119	0.00805509	0.0200262	Down	0.809195
ENSG00000198580	unprocessed_pseudogene	zinc finger protein pseudogene	AC073343.1	0.373497	2.63415	10.1093	0.00147524	0.00454777	Up	1.29549
ENSG00000223812	lncRNA	novel transcript	AC073365.1	0.112026	4.54666	1.73773	0.187426	0.280643	Unchanged	1.08074
ENSG00000278834	lncRNA	novel transcript, antisense to SMARCE1	AC073508.3	0.380685	2.45671	8.97136	0.00274244	0.00782744	Up	1.30196
ENSG00000280120	TEC	novel transcript	AC073857.1	-0.121775	2.93482	0.939067	0.332518	0.440821	Unchanged	0.919056
ENSG00000242299	processed_pseudogene	ribosomal protein S18 (RPS18) pseudogene	AC073861.1	0.11384	3.10638	1.11007	0.292068	0.398817	Unchanged	1.0821
ENSG00000234072	lncRNA	novel transcript, antisense to GTF3C2 and EIF2B4	AC074117.1	0.0337106	3.98507	0.169495	0.680561	0.762997	Unchanged	1.02364
ENSG00000267886	lncRNA	novel transcript	AC074135.1	0.3644	2.77362	9.10306	0.00255182	0.00735949	Up	1.28735
ENSG00000273329	lncRNA	novel transcript	AC078846.1	0.270079	4.19036	9.73725	0.00180571	0.00543918	Unchanged	1.20587
ENSG00000278266	lncRNA	novel transcript	AC079949.2	0.30767	2.38793	5.18381	0.0227983	0.0486781	Up	1.23771
ENSG00000285744	lncRNA	novel transcript	AC083837.1	0.318822	4.73571	12.6422	0.00037713	0.00136312	Up	1.24731
ENSG00000259820	lncRNA	novel transcript	AC083843.2	0.296004	2.97117	6.13655	0.0132416	0.0307075	Unchanged	1.22774
ENSG00000261879	lncRNA	ZNF594 divergent transcript [Source:HGNC Symbol;Acc:HGNC:55347]	AC087500.1	-0.0418103	3.0261	0.115704	0.733742	0.806698	Unchanged	0.971435
ENSG00000273270	lncRNA	novel transcript	AC090114.2	0.134595	4.68601	4.31347	0.0378117	0.0749251	Unchanged	1.09778
ENSG00000167912	lncRNA	novel transcript	AC090152.1	0.437742	2.66657	14.0852	0.000174711	0.000679166	Up	1.35448
ENSG00000285331	lncRNA	novel transcript	AC090517.5	0.481551	2.27479	12.4858	0.000410066	0.00146662	Up	1.39624
ENSG00000187951	lncRNA	novel transcript	AC091057.1	0.134971	4.67713	4.2972	0.0381752	0.0755163	Unchanged	1.09807
ENSG00000279555	TEC	TEC	AC091181.1	0.407815	2.25603	2.74772	0.097393	0.164873	Unchanged	1.32668
ENSG00000275038	lncRNA	novel transcript, antisense to TLX3	AC091980.2	0.15894	2.47641	1.33142	0.248554	0.351233	Unchanged	1.11647
ENSG00000269001	transcribed_unprocessed_pseudogene	zinc finger protein 818, pseudogene	AC092070.2	0.186963	3.99962	4.29497	0.0382253	0.0755637	Unchanged	1.13837
ENSG00000268362	lncRNA	novel transcript	AC092279.1	0.502453	4.41674	8.7763	0.00305169	0.00860832	Up	1.41662
ENSG00000284428	lncRNA	novel transcript	AC092329.4	0.00242522	3.13342	0.000349767	0.985079	0.990567	Unchanged	1.00168
ENSG00000250448	lncRNA	novel transcript, antisense to MARCH11	AC092335.1	0.630855	2.48242	25.7563	3.8736e-07	2.55623e-06	Up	1.54848
ENSG00000278962	TEC	TEC	AC092645.1	0.125553	3.67085	2.13013	0.144429	0.227628	Unchanged	1.09093
ENSG00000275764	lncRNA	novel transcript	AC092747.4	0.022214	2.90368	0.0430024	0.835721	0.884414	Unchanged	1.01552
ENSG00000242622	lncRNA	novel transcript	AC092910.3	0.159888	2.71875	1.519	0.217771	0.315758	Unchanged	1.1172
ENSG00000233184	lncRNA	novel transcript	AC093157.1	-0.214382	4.54424	9.52906	0.00202243	0.00600306	Unchanged	0.861915
ENSG00000267152	lncRNA	novel transcript	AC093227.1	-0.0639035	2.40788	0.238308	0.625431	0.715872	Unchanged	0.956672
ENSG00000272335	lncRNA	novel transcript	AC093297.2	-0.0308003	3.51618	0.120276	0.728736	0.802489	Unchanged	0.978877
ENSG00000279161	TEC	TEC	AC093503.2	-0.487	3.51406	17.605	2.71865e-05	0.000126827	Down	0.713507
ENSG00000242474	lncRNA	novel transcript	AC093627.5	0.286283	4.07204	12.7059	0.000364513	0.00132082	Unchanged	1.21949
ENSG00000286039	lncRNA	novel transcript	AC093849.2	0.550309	6.40978	153.343	3.2241e-35	2.91882e-33	Up	1.4644
ENSG00000260296	lncRNA	novel transcript, overlapping N4BP2	AC095057.3	-0.000385743	2.83202	7.83829e-06	0.997766	0.99847	Unchanged	0.999733
ENSG00000283431	unprocessed_pseudogene	novel zinc finger protein pseudogene	AC099654.5	-0.0741416	3.23181	0.459187	0.498004	0.606072	Unchanged	0.949907
ENSG00000253982	lncRNA	novel transcript	AC100810.1	-0.0560939	3.32186	0.359895	0.548565	0.651308	Unchanged	0.961865
ENSG00000273230	lncRNA	novel transcript	AC102953.2	-0.0391746	2.79088	0.110848	0.739181	0.811369	Unchanged	0.973212
ENSG00000282381	lncRNA	novel transcript	AC104073.4	0.414879	2.38216	9.75633	0.00178706	0.00539144	Up	1.33319
ENSG00000252690	lncRNA	TEC	AC105339.2	-0.0273492	2.79219	0.0480832	0.826433	0.878244	Unchanged	0.981222
ENSG00000250159	lncRNA	novel transcript	AC106791.1	0.528477	2.37816	14.2413	0.000160806	0.000628686	Up	1.44241
ENSG00000170089	transcribed_unprocessed_pseudogene	THO complex 3 (THOC3) pseudogene	AC106795.1	-0.405647	2.81256	11.813	0.0005882	0.00201242	Down	0.754898
ENSG00000260293	lncRNA	novel transcript, intronic to TBC1D24	AC106820.4	0.0411289	4.78512	0.270856	0.602758	0.697151	Unchanged	1.02892
ENSG00000271474	lncRNA	UNC5C antisense RNA 1 [Source:HGNC Symbol;Acc:HGNC:55246]	AC106881.1	0.867194	4.28264	160.186	1.0306e-36	1.03849e-34	Up	1.82411
ENSG00000251216	lncRNA	novel transcript	AC106895.2	0.510972	4.88289	58.999	1.57751e-14	2.92952e-13	Up	1.42501
ENSG00000261167	lncRNA	novel transcript, overlapping to MRPL3	AC107027.3	-0.301302	2.46441	4.63479	0.0313299	0.06394	Unchanged	0.81152
ENSG00000259959	lncRNA	novel transcript	AC107068.1	-0.20459	3.94104	4.5985	0.0319999	0.0651582	Unchanged	0.867785
ENSG00000259891	lncRNA	novel transcript, antisense to CHRAC1	AC107375.1	0.158272	3.56287	3.58093	0.0584463	0.107846	Unchanged	1.11595
ENSG00000259366	lncRNA	novel transcript, sense intronic to HMBOX1	AC108449.2	0.163113	3.84011	3.60701	0.0575365	0.106371	Unchanged	1.1197
ENSG00000287126	lncRNA	novel transcript	AC108488.3	0.244295	3.18237	5.78755	0.0161401	0.0362393	Unchanged	1.18451
ENSG00000260404	transcribed_unprocessed_pseudogene	general transcription factor IIi (GTF2I) pseudogene	AC110079.1	-0.0376624	4.23504	0.230466	0.631179	0.720885	Unchanged	0.974232
ENSG00000262877	lncRNA	novel transcript	AC110285.2	0.414174	2.76101	6.92917	0.0084801	0.0209168	Up	1.33254
ENSG00000256663	processed_pseudogene	ubiquitin-like with PHD and ring finger domains 1 (UHRF1) pseudogene	AC112777.1	-0.330816	2.5571	6.64021	0.00997023	0.0240849	Down	0.795087
ENSG00000279759	TEC	TEC	AC118344.2	0.0775814	3.08285	0.42384	0.515027	0.621551	Unchanged	1.05525
ENSG00000286619	lncRNA	novel transcript, antisense to PM20D1	AC119673.2	-0.160736	4.75209	6.48968	0.0108503	0.0258709	Unchanged	0.894569
ENSG00000271971	lncRNA	novel transcript, antisense to FAM92A1	AC120053.1	0.0192276	2.51878	0.0207804	0.885379	0.920397	Unchanged	1.01342
ENSG00000272077	lncRNA	novel transcript	AC124045.1	-0.0731772	2.92686	0.405481	0.524272	0.629888	Unchanged	0.950542
ENSG00000245281	lncRNA	novel transcript	AC124242.1	0.265415	2.46569	4.82348	0.0280746	0.0581567	Unchanged	1.20198
ENSG00000260196	lncRNA	antisense to KCNJ11 and overlapping to a novel gene	AC124798.1	0.0528232	3.17748	0.285684	0.592999	0.689858	Unchanged	1.03729
ENSG00000250899	lncRNA	novel transcript	AC125807.2	-0.271761	3.45211	9.57794	0.00196929	0.00586637	Unchanged	0.828308
ENSG00000280088	TEC	TEC	AC126474.2	-0.0628912	2.38685	0.231335	0.630536	0.720297	Unchanged	0.957344
ENSG00000266490	lncRNA	novel transcript	AC127024.5	0.106543	2.59172	0.633729	0.425991	0.536938	Unchanged	1.07665
ENSG00000280287	TEC	novel transcript	AC131212.3	-0.362367	2.88991	7.10015	0.00770777	0.0193119	Down	0.777887
ENSG00000214135	transcribed_unprocessed_pseudogene	succinate dehydrogenase complex, subunit A, flavoprotein (Fp) (SDHA) pseudogene	AC132008.2	-0.150964	4.62906	4.25239	0.0391952	0.0770672	Unchanged	0.900648
ENSG00000260563	lncRNA	novel transcript	AC132872.1	0.438923	2.81339	15.564	7.97572e-05	0.000335716	Up	1.35559
ENSG00000279744	TEC	TEC	AC132938.5	0.393877	2.59645	5.80653	0.0159668	0.0359682	Up	1.31392
ENSG00000278133	lncRNA	novel transcript, sense intronic to KAT8	AC135050.6	0.120939	3.60731	1.68594	0.194137	0.287975	Unchanged	1.08744
ENSG00000278928	TEC	novel transcript	AC136621.1	-0.837457	5.23544	125.455	4.04694e-29	2.56262e-27	Down	0.559629
ENSG00000215158	transcribed_unprocessed_pseudogene	Putative beta-glucuronidase-like protein FLJ75287 pseudogene	AC138409.2	0.50004	3.61746	26.5903	2.51506e-07	1.71944e-06	Up	1.41425
ENSG00000274253	lncRNA	novel transcript, sense overlapping NIPA1	AC138649.1	-0.308081	3.70012	11.0135	0.0009045	0.00294585	Down	0.807715
ENSG00000246465	lncRNA	novel transcript LOC100506705	AC138904.1	0.434605	3.86733	27.3342	1.7116e-07	1.19988e-06	Up	1.35154
ENSG00000262049	lncRNA	novel transcript, antisense to HGS	AC139530.1	0.201648	3.33846	4.18529	0.0407763	0.0796018	Unchanged	1.15001
ENSG00000233836	transcribed_unprocessed_pseudogene	zinc finger protein 726 pseudogene 1	AC139769.1	-0.105771	4.00219	1.6685	0.196459	0.290824	Unchanged	0.929308
ENSG00000246596	transcribed_unprocessed_pseudogene	SUMO interacting motifs containing 1 (SIMC1) pseudogene	AC139795.1	0.0951146	3.85978	1.23735	0.265982	0.370322	Unchanged	1.06815
ENSG00000249592	lncRNA	novel transcript, antisense to PCGF3	AC139887.2	-0.67984	3.72157	41.0537	1.48102e-10	1.6502e-09	Down	0.624234
ENSG00000263731	lncRNA	novel transcript	AC145207.5	-0.0993302	3.04222	0.409628	0.522158	0.627738	Unchanged	0.933466
ENSG00000287222	lncRNA	novel transcript, antisense to PUF60	AC234917.3	0.130613	2.71127	1.27604	0.258636	0.362623	Unchanged	1.09476
ENSG00000237550	transcribed_processed_pseudogene	ribosomal protein L9 pseudogene 9	AC243919.1	0.0858895	4.71701	1.28364	0.257224	0.36099	Unchanged	1.06134
ENSG00000285184	lncRNA	novel transcript	AC244033.2	0.366798	3.70406	17.8308	2.41441e-05	0.000113594	Up	1.28949
ENSG00000272108	lncRNA	novel transcript	AC244517.1	0.313444	2.84622	8.05962	0.00452627	0.0121695	Up	1.24267
ENSG00000274422	lncRNA	novel transcript	AC245060.5	0.0768318	3.33405	0.354229	0.551729	0.654454	Unchanged	1.0547
ENSG00000241684	lncRNA	ADAMTS9 antisense RNA 2 [Source:HGNC Symbol;Acc:HGNC:42435]	ADAMTS9-AS2	0.342924	3.39349	13.5908	0.000227303	0.000862188	Up	1.26832
ENSG00000161912	transcribed_unprocessed_pseudogene	ADCY10 pseudogene 1 [Source:HGNC Symbol;Acc:HGNC:44143]	ADCY10P1	-0.278338	3.19738	7.48306	0.00622822	0.0160848	Unchanged	0.824541
ENSG00000272163	lncRNA	novel transcript, antisense to NEFM	AF106564.1	0.0266258	3.97225	0.0684483	0.79361	0.853014	Unchanged	1.01863
ENSG00000251136	lncRNA	novel transcript	AF117829.1	0.290519	4.47583	16.6811	4.42195e-05	0.00019792	Unchanged	1.22308
ENSG00000255310	lncRNA	novel transcript	AF131215.5	0.174465	3.97066	4.26286	0.0389543	0.0766909	Unchanged	1.12855
ENSG00000269918	lncRNA	novel transcript	AF131215.6	-0.10863	3.09526	1.01071	0.314732	0.421778	Unchanged	0.927468
ENSG00000255085	transcribed_unprocessed_pseudogene	zinc finger protein 154 (ZNF154) pseudogene	AF186192.2	0.401965	3.60816	22.5351	2.06335e-06	1.1997e-05	Up	1.32131
ENSG00000286681	lncRNA	novel transcript	AF235103.3	0.263529	2.55072	3.88094	0.0488372	0.0930493	Unchanged	1.20041
ENSG00000223959	transcribed_unitary_pseudogene	AFG3 like matrix AAA peptidase subunit 1, pseudogene [Source:HGNC Symbol;Acc:HGNC:314]	AFG3L1P	-0.159649	5.57466	7.39942	0.00652447	0.0167306	Unchanged	0.895243
ENSG00000255737	lncRNA	AGAP2 antisense RNA 1 [Source:HGNC Symbol;Acc:HGNC:48633]	AGAP2-AS1	0.0298786	3.52359	0.0900338	0.764134	0.830733	Unchanged	1.02093
ENSG00000173209	transcribed_unitary_pseudogene	activator of HSP90 ATPase homolog 2, pseudogene [Source:HGNC Symbol;Acc:HGNC:20437]	AHSA2P	0.256638	5.79215	10.2243	0.00138605	0.0042998	Unchanged	1.19469
ENSG00000280604	lncRNA	PCBP3 overlapping transcript 1	AJ239328.1	-0.303173	3.80497	11.8944	0.000563038	0.00193547	Down	0.810468
ENSG00000228274	lncRNA	novel transcript, antisense to CBY1	AL021707.2	0.218123	2.6942	2.90452	0.0883314	0.152093	Unchanged	1.16322
ENSG00000279738	lncRNA	novel transcript, sense overlapping to EIF3L	AL022311.1	0.141426	3.10525	0.769231	0.380455	0.490839	Unchanged	1.103
ENSG00000268575	lncRNA	novel transcript, readthrough between SLC35E2 and CDK11A	AL031282.2	0.161389	3.19527	2.13337	0.144124	0.227256	Unchanged	1.11836
ENSG00000278948	TEC	TEC	AL031587.5	0.0100461	2.46729	0.00640692	0.936203	0.954909	Unchanged	1.00699
ENSG00000260920	lncRNA	novel transcript, sense overlapping with ZNF643	AL031985.3	-0.291299	4.30226	12.4392	0.000420411	0.0015013	Unchanged	0.817166
ENSG00000260257	lncRNA	novel transcript	AL035071.1	-0.0166734	2.38294	0.00723496	0.932215	0.952434	Unchanged	0.988509
ENSG00000275632	lncRNA	novel transcript	AL035461.2	-0.415703	2.84273	12.6038	0.000384967	0.00138713	Down	0.749654
ENSG00000271913	lncRNA	TAGAP antisense RNA 1 [Source:HGNC Symbol;Acc:HGNC:55239]	AL035530.2	0.580219	2.27575	18.5291	1.67331e-05	8.15749e-05	Up	1.49508
ENSG00000231113	lncRNA	novel transcript	AL035587.1	-0.220082	2.72181	3.36384	0.0666426	0.120589	Unchanged	0.858517
ENSG00000269958	lncRNA	novel transcript, sense intronic to KLC1	AL049840.5	-0.299385	2.52637	5.51699	0.0188326	0.0414181	Unchanged	0.812599
ENSG00000259943	lncRNA	novel transcript, antisense to ZMPSTE24	AL050341.2	0.395924	3.13458	13.4622	0.00024342	0.00091881	Up	1.31579
ENSG00000287562	lncRNA	novel transcript	AL109615.4	-0.268478	3.24807	5.50168	0.0189982	0.0417112	Unchanged	0.830195
ENSG00000288398	lncRNA	novel transcript	AL109627.1	-0.397266	3.19762	18.3494	1.83872e-05	8.90023e-05	Down	0.759296
ENSG00000216775	transcribed_unprocessed_pseudogene	heterogeneous nuclear ribonucleoprotein A/B (HNRNPAB) pseudogene	AL109918.1	0.0206106	5.8091	0.192259	0.661043	0.746096	Unchanged	1.01439
ENSG00000224271	lncRNA	novel transcript	AL117329.1	0.0325908	3.3151	0.0564274	0.812234	0.868029	Unchanged	1.02285
ENSG00000268858	lncRNA	novel transcript, antisense to ABHD16B	AL118506.1	-0.0513814	3.46747	0.17507	0.675645	0.759041	Unchanged	0.965012
ENSG00000258738	lncRNA	novel transcript, antisense to BAZ1A	AL121603.2	0.243599	3.35046	6.1078	0.0134587	0.0311047	Unchanged	1.18394
ENSG00000274492	lncRNA	novel transcript	AL121768.1	0.331136	2.33928	5.96124	0.0146237	0.0334042	Up	1.258
ENSG00000259017	lncRNA	novel transcript	AL133163.3	0.876	2.4744	38.5092	5.44952e-10	5.52485e-09	Up	1.83528
ENSG00000276805	transcribed_unprocessed_pseudogene	general transcription factor IIi (GTF2I) pseudogene	AL133216.2	-0.543089	4.0996	45.1125	1.86031e-11	2.34829e-10	Down	0.6863
ENSG00000276334	lncRNA	novel transcript, sense intronic to BIRC6	AL133243.2	0.193645	2.58773	1.76948	0.183447	0.275753	Unchanged	1.14365
ENSG00000227388	lncRNA	novel transcript	AL133410.1	0.207552	2.35285	2.31312	0.128286	0.206642	Unchanged	1.15473
ENSG00000286964	lncRNA	novel transcript	AL136169.1	0.453336	2.43706	12.2277	0.000470845	0.00165539	Up	1.3692
ENSG00000274718	lncRNA	novel transcript	AL136964.1	0.727783	2.81184	37.0641	1.14309e-09	1.10384e-08	Up	1.65609
ENSG00000259953	lncRNA	novel transcript, overlapping SUSD1	AL138756.1	0.0203993	4.13373	0.051917	0.819761	0.873507	Unchanged	1.01424
ENSG00000273149	lncRNA	novel transcript, antisense to TPT1	AL138963.3	0.78631	2.30556	10.0248	0.00154443	0.00473964	Up	1.72466
ENSG00000239665	lncRNA	novel transcript	AL157392.3	0.0938335	4.92505	2.55497	0.109948	0.182063	Unchanged	1.0672
ENSG00000226530	lncRNA	novel transcript	AL158055.1	0.313467	2.98451	8.31333	0.00393552	0.0107813	Up	1.24269
ENSG00000260917	lncRNA	novel transcript, overlapping to VTI1A	AL158212.3	-0.273132	4.79439	19.9613	7.90255e-06	4.09181e-05	Unchanged	0.827521
ENSG00000258634	lncRNA	novel transcript, antisense to ALX3	AL160006.1	0.093483	5.08184	2.0725	0.149976	0.235037	Unchanged	1.06694
ENSG00000278291	lncRNA	novel transcript, antisense to IL17D	AL161772.1	-0.152434	3.97878	3.40102	0.0651562	0.118158	Unchanged	0.899731
ENSG00000276672	lncRNA	novel transcript, sense intronic to RFC3	AL161891.1	0.259844	3.52444	8.60619	0.00335023	0.00933007	Unchanged	1.19735
ENSG00000230074	lncRNA	novel transcript	AL162231.2	-0.394654	2.45667	9.95943	0.00160027	0.00488771	Down	0.760672
ENSG00000285796	lncRNA	novel transcript	AL162458.1	0.509439	2.88347	20.3342	6.50266e-06	3.41427e-05	Up	1.4235
ENSG00000177788	lncRNA	novel transcript	AL162595.1	-0.177972	5.09918	9.25161	0.00235288	0.0068782	Unchanged	0.883945
ENSG00000165121	transcribed_unprocessed_pseudogene	kinesin family member 27 (KIF27) pseudogene	AL353743.1	0.0902366	2.85663	0.54449	0.460578	0.570762	Unchanged	1.06454
ENSG00000260412	lncRNA	novel transcript, overlapping LINGO2	AL353746.1	-0.0513622	4.4384	0.468664	0.493603	0.602028	Unchanged	0.965025
ENSG00000259994	lncRNA	novel transcript, overlapping to MTPAP	AL353796.1	-0.264267	2.71348	4.84314	0.0277563	0.0576828	Unchanged	0.832622
ENSG00000273373	lncRNA	novel transcript, antisense to SLC16A4	AL355488.1	-0.331256	4.18812	13.0811	0.000298293	0.00110329	Down	0.794844
ENSG00000260947	lncRNA	novel transcript	AL356489.2	0.148878	4.51308	4.55438	0.0328347	0.0664725	Unchanged	1.10871
ENSG00000233967	lncRNA	novel transcript	AL359715.1	0.0934836	3.29644	0.697614	0.403587	0.514439	Unchanged	1.06694
ENSG00000259834	lncRNA	novel transcript	AL365361.1	-0.0655456	3.71619	0.534036	0.464915	0.574782	Unchanged	0.955584
ENSG00000259865	lncRNA	novel transcript	AL390728.5	-0.160968	3.39392	2.24549	0.134005	0.214274	Unchanged	0.894424
ENSG00000224934	lncRNA	novel transcript	AL391684.1	0.0988712	2.66838	0.573547	0.448853	0.55922	Unchanged	1.07094
ENSG00000230910	lncRNA	novel transcript	AL391807.1	0.595504	3.82909	26.7592	2.30456e-07	1.58582e-06	Up	1.511
ENSG00000282390	lncRNA	novel transcript, sense intronic to ADARB2	AL392083.1	0.832199	5.23242	154.409	1.88496e-35	1.76152e-33	Up	1.7804
ENSG00000276248	lncRNA	novel transcript, sense intronic to TMCO3	AL442125.1	0.372014	2.644	10.1797	0.00141998	0.00439966	Up	1.29416
ENSG00000240291	lncRNA	novel transcript, antisense to CACNB2	AL450384.2	0.352412	2.78569	6.77793	0.00922917	0.0225248	Up	1.27669
ENSG00000287168	lncRNA	novel transcript	AL512625.3	0.127555	3.02943	1.59953	0.205969	0.30197	Unchanged	1.09244
ENSG00000269896	transcribed_processed_pseudogene	small nuclear ribonucleoprotein N (SNRPN) pseudogene	AL513477.1	-0.0670481	2.45881	0.267693	0.604884	0.699261	Unchanged	0.954589
ENSG00000260400	lncRNA	novel transcript, overlapping to TET1	AL513534.2	0.204237	4.00977	3.82434	0.0505131	0.0954887	Unchanged	1.15208
ENSG00000228506	lncRNA	novel transcript	AL513550.1	0.442389	2.87545	17.6587	2.64297e-05	0.000123495	Up	1.35885
ENSG00000287837	lncRNA	novel transcript	AL590064.1	0.301022	3.25723	9.20877	0.00240858	0.00700569	Up	1.23202
ENSG00000218426	processed_pseudogene	60S ribosomal protein L27a (RPL27A) pseudogene	AL590867.2	0.37649	2.5717	7.71668	0.0054713	0.0143833	Up	1.29818
ENSG00000260855	lncRNA	novel transcript	AL591848.3	-0.141712	3.059	1.8064	0.17894	0.270629	Unchanged	0.906443
ENSG00000288670	lncRNA	novel transcript	AL592295.6	0.0528949	3.74527	0.353283	0.552261	0.654958	Unchanged	1.03734
ENSG00000235381	lncRNA	novel transcript	AL596202.1	0.0708796	3.6171	0.466335	0.494678	0.60302	Unchanged	1.05036
ENSG00000261534	lncRNA	novel transcript, overlapping TTLL11	AL596244.1	-0.417837	2.76122	13.4915	0.000239652	0.000906065	Down	0.748546
ENSG00000230699	lncRNA	novel transcript	AL645608.2	-0.484844	5.16398	34.0675	5.32327e-09	4.67673e-08	Down	0.714575
ENSG00000280128	TEC	TEC	AL662795.2	0.0524008	5.77616	0.422994	0.515447	0.621864	Unchanged	1.03699
ENSG00000272106	lncRNA	artifact	AL691432.2	0.238116	3.41656	5.45694	0.0194907	0.0426148	Unchanged	1.17945
ENSG00000251602	lncRNA	novel transcript, antisense to MTA1	AL928654.1	0.146067	3.04698	1.43935	0.230244	0.329758	Unchanged	1.10655
ENSG00000214174	transcribed_unprocessed_pseudogene	archaelysin family metallopeptidase 2 pseudogene 1 [Source:HGNC Symbol;Acc:HGNC:26491]	AMZ2P1	0.218305	4.18507	7.69586	0.00553478	0.0145304	Unchanged	1.16337
ENSG00000229152	lncRNA	ANKRD10 intronic transcript 1 [Source:HGNC Symbol;Acc:HGNC:39891]	ANKRD10-IT1	0.0219838	4.49819	0.0953294	0.757508	0.825932	Unchanged	1.01535
ENSG00000215559	transcribed_unprocessed_pseudogene	ankyrin repeat domain 20 family member A11, pseudogene [Source:HGNC Symbol;Acc:HGNC:42024]	ANKRD20A11P	0.236535	3.68191	3.10852	0.0778839	0.137161	Unchanged	1.17816
ENSG00000272578	transcribed_unprocessed_pseudogene	glucuronidase, beta (GUSB) pseudogene	AP000347.1	0.148277	2.42933	1.19573	0.274178	0.379636	Unchanged	1.10825
ENSG00000273295	lncRNA	novel transcript	AP000350.6	0.0541345	2.81372	0.146796	0.701616	0.780712	Unchanged	1.03824
ENSG00000261098	lncRNA	novel transcript	AP000766.1	-0.0437573	3.18629	0.190506	0.662496	0.747444	Unchanged	0.970125
ENSG00000247416	lncRNA	novel transcript, antisense to NCAM1	AP000802.1	0.255123	2.85102	5.18356	0.0228016	0.0486781	Unchanged	1.19344
ENSG00000245498	lncRNA	novel transcript, antisense to C11orf61	AP000866.1	0.485108	2.45075	13.8544	0.000197531	0.000760716	Up	1.39969
ENSG00000279342	lncRNA	novel transcript, sense intronic to MSANTD2	AP000866.6	0.815132	3.31374	33.4989	7.13036e-09	6.15698e-08	Up	1.75946
ENSG00000247137	lncRNA	novel transcript	AP000873.1	0.392406	3.32479	9.59522	0.00195084	0.00582339	Up	1.31258
ENSG00000255468	lncRNA	novel transcript, antisense to SLC29A2	AP001107.9	-0.0783581	2.92324	0.536884	0.463727	0.573732	Unchanged	0.947135
ENSG00000254837	lncRNA	novel transcript	AP001372.2	0.135702	2.52689	1.26887	0.259978	0.363976	Unchanged	1.09863
ENSG00000246090	lncRNA	novel transcript, antisense to ADH4, ADH6 & ADH1A	AP002026.1	0.389237	2.94862	11.2053	0.000815637	0.00269277	Up	1.3097
ENSG00000255135	lncRNA	novel transcript	AP002360.1	0.49654	2.45341	15.5964	7.84026e-05	0.000330976	Up	1.41083
ENSG00000251143	lncRNA	novel transcript	AP002490.1	0.781411	2.52719	15.6655	7.55923e-05	0.000319928	Up	1.71881
ENSG00000261578	lncRNA	novel transcript, overlapping to TSKU	AP003119.3	-0.0751153	2.74959	0.371391	0.542247	0.645994	Unchanged	0.949266
ENSG00000214293	lncRNA	Alu-mediated CDKN1A/p21 transcriptional regulator [Source:HGNC Symbol;Acc:HGNC:44173]	APTR	-0.193651	3.75584	3.8474	0.0498231	0.0945235	Unchanged	0.87439
ENSG00000271147	lncRNA	ARMCX5-GPRASP2 readthrough [Source:HGNC Symbol;Acc:HGNC:42000]	ARMCX5-GPRASP2	0.195091	3.04131	3.84319	0.0499483	0.0947147	Unchanged	1.1448
ENSG00000203993	lncRNA	ARRDC1 antisense RNA 1 [Source:HGNC Symbol;Acc:HGNC:23395]	ARRDC1-AS1	-0.114661	4.07189	1.70561	0.191556	0.285224	Unchanged	0.923599
ENSG00000267080	lncRNA	ASB16 antisense RNA 1 [Source:HGNC Symbol;Acc:HGNC:25442]	ASB16-AS1	0.153221	3.80722	2.78231	0.0953107	0.162111	Unchanged	1.11205
ENSG00000248498	transcribed_unprocessed_pseudogene	asparagine synthetase pseudogene 1 [Source:HGNC Symbol;Acc:HGNC:754]	ASNSP1	-0.448368	2.27489	9.34753	0.00223286	0.00656378	Down	0.732872
ENSG00000203865	lncRNA	ATP1A1 antisense RNA 1 [Source:HGNC Symbol;Acc:HGNC:28262]	ATP1A1-AS1	0.322766	2.8733	7.81402	0.00518423	0.0137063	Up	1.25073
ENSG00000205464	transcribed_unitary_pseudogene	ATPase H+ transporting accessory protein 1 like [Source:HGNC Symbol;Acc:HGNC:28091]	ATP6AP1L	0.287051	3.55028	10.5705	0.00114907	0.00364706	Unchanged	1.22014
ENSG00000204934	lncRNA	ATP6V0E2 antisense RNA 1 [Source:HGNC Symbol;Acc:HGNC:44180]	ATP6V0E2-AS1	-0.491966	3.15523	21.5554	3.43746e-06	1.92618e-05	Down	0.711056
ENSG00000255545	lncRNA	B3GAT1 diverget transcript [Source:HGNC Symbol;Acc:HGNC:27449]	B3GAT1-DT	0.646047	2.50574	25.5391	4.33504e-07	2.8365e-06	Up	1.56487
ENSG00000278768	lncRNA	BACE1 antisense RNA [Source:HGNC Symbol;Acc:HGNC:37125]	BACE1-AS	0.253856	4.7294	14.156	0.00016826	0.000655614	Unchanged	1.19239
ENSG00000226137	lncRNA	BAIAP2 divergent transcript [Source:HGNC Symbol;Acc:HGNC:44342]	BAIAP2-DT	0.0575354	5.31101	1.30352	0.253572	0.356861	Unchanged	1.04069
ENSG00000204177	transcribed_unprocessed_pseudogene	BMS1 pseudogene 1 [Source:HGNC Symbol;Acc:HGNC:23649]	BMS1P1	0.196113	3.10499	3.48558	0.0619057	0.113292	Unchanged	1.14561
ENSG00000260518	transcribed_unprocessed_pseudogene	BMS1 pseudogene 8 [Source:HGNC Symbol;Acc:HGNC:49152]	BMS1P8	0.0218583	2.56408	0.0353825	0.850796	0.894811	Unchanged	1.01527
ENSG00000225439	lncRNA	BOLA3 divergent transcript [Source:HGNC Symbol;Acc:HGNC:42922]	BOLA3-AS1	-0.122815	4.25383	3.26804	0.0706421	0.126334	Unchanged	0.918394
ENSG00000203808	lncRNA	BVES antisense RNA 1 [Source:HGNC Symbol;Acc:HGNC:21223]	BVES-AS1	-0.0954892	3.74509	1.03831	0.308215	0.415302	Unchanged	0.935955
ENSG00000259946	lncRNA	novel transcript	BX005019.1	1.03756	3.51486	107.34	3.75017e-25	1.76654e-23	Up	2.05275
ENSG00000215146	transcribed_unprocessed_pseudogene	zinc finger protein pseudogene	BX322639.1	0.0235222	5.70445	0.12955	0.718899	0.794753	Unchanged	1.01644
ENSG00000285756	lncRNA	novel transcript	BX890604.1	-0.0294072	5.47796	0.240683	0.623713	0.71453	Unchanged	0.979823
ENSG00000167747	transcribed_unitary_pseudogene	chromosome 19 open reading frame 48 [Source:HGNC Symbol;Acc:HGNC:29667]	C19orf48	-0.112418	5.5134	4.25171	0.0392108	0.0770779	Unchanged	0.925036
ENSG00000205930	lncRNA	C21orf62 antisense RNA 1 [Source:HGNC Symbol;Acc:HGNC:1290]	C21orf62-AS1	0.354111	2.34831	6.65259	0.00990118	0.023958	Up	1.2782
ENSG00000184208	transcribed_unitary_pseudogene	chromosome 22 putative open reading frame 46 [Source:HGNC Symbol;Acc:HGNC:26294]	C22orf46	0.174054	4.89561	8.93756	0.00279366	0.00795598	Unchanged	1.12822
ENSG00000287151	lncRNA	chromosome 2 open reading frame 27A [Source:HGNC Symbol;Acc:HGNC:25077]	C2orf27A	0.0717028	2.75374	0.42439	0.514755	0.621287	Unchanged	1.05096
ENSG00000272994	lncRNA	C2orf49 divergent transcript [Source:HGNC Symbol;Acc:HGNC:55178]	C2orf49-DT	0.292734	3.70896	13.1279	0.000290936	0.00108022	Unchanged	1.22496
ENSG00000288596	lncRNA	chromosome 8 open reading frame 44 [Source:HGNC Symbol;Acc:HGNC:25646]	C8orf44	0.302913	3.0221	7.56	0.0059678	0.0154986	Up	1.23363
ENSG00000186312	transcribed_unprocessed_pseudogene	carbonic anhydrase 5B pseudogene 1 [Source:HGNC Symbol;Acc:HGNC:29544]	CA5BP1	-0.0104645	3.85259	0.0132633	0.908313	0.936102	Unchanged	0.992773
ENSG00000260942	lncRNA	CAPN10 divergent transcript [Source:HGNC Symbol;Acc:HGNC:48839]	CAPN10-DT	0.219139	2.49528	3.35707	0.0669169	0.120897	Unchanged	1.16404
ENSG00000272168	lncRNA	cancer susceptibility 15 [Source:HGNC Symbol;Acc:HGNC:28245]	CASC15	0.344427	6.42308	74.5593	5.88448e-18	1.53235e-16	Up	1.26965
ENSG00000177640	lncRNA	cancer susceptibility 2 [Source:HGNC Symbol;Acc:HGNC:22933]	CASC2	0.185147	2.82007	2.09664	0.147623	0.231797	Unchanged	1.13693
ENSG00000249395	lncRNA	cancer susceptibility 9 [Source:HGNC Symbol;Acc:HGNC:48906]	CASC9	0.560883	2.39957	15.5733	7.93676e-05	0.000334441	Up	1.47517
ENSG00000239521	transcribed_unprocessed_pseudogene	CASTOR family member 3 [Source:HGNC Symbol;Acc:HGNC:29954]	CASTOR3	0.127619	5.96389	6.61748	0.0100983	0.0243636	Unchanged	1.09249
ENSG00000233098	lncRNA	CCDC144NL antisense RNA 1 [Source:HGNC Symbol;Acc:HGNC:51340]	CCDC144NL-AS1	0.396633	6.07662	55.5213	9.24537e-14	1.57119e-12	Up	1.31643
ENSG00000223745	lncRNA	CCDC18 antisense RNA 1 [Source:HGNC Symbol;Acc:HGNC:52262]	CCDC18-AS1	0.455823	4.7283	35.5934	2.43107e-09	2.23759e-08	Up	1.37156
ENSG00000224043	lncRNA	CCNT2 antisense RNA 1 [Source:HGNC Symbol;Acc:HGNC:40130]	CCNT2-AS1	0.371019	2.50284	8.52509	0.00350284	0.00972004	Up	1.29327
ENSG00000182632	transcribed_unprocessed_pseudogene	cyclin Y like 2 (pseudogene) [Source:HGNC Symbol;Acc:HGNC:23495]	CCNYL2	0.567966	4.61024	63.8761	1.32494e-15	2.79153e-14	Up	1.48243
ENSG00000228409	transcribed_unprocessed_pseudogene	chaperonin containing TCP1 subunit 6 pseudogene 1 [Source:HGNC Symbol;Acc:HGNC:33094]	CCT6P1	0.227831	3.76999	7.35647	0.00668219	0.0170746	Unchanged	1.17107
ENSG00000234585	transcribed_unprocessed_pseudogene	chaperonin containing TCP1 subunit 6 pseudogene 3 [Source:HGNC Symbol;Acc:HGNC:35137]	CCT6P3	0.175943	2.52205	1.70178	0.192055	0.28561	Unchanged	1.1297
ENSG00000255121	lncRNA	CENATAC divergent transcript [Source:HGNC Symbol;Acc:HGNC:54215]	CENATAC-DT	-0.297235	2.52179	4.55387	0.0328445	0.0664807	Unchanged	0.813811
ENSG00000177946	transcribed_unitary_pseudogene	CENPB DNA-binding domain containing 1 [Source:HGNC Symbol;Acc:HGNC:28272]	CENPBD1	-0.150476	4.42155	3.71877	0.0538041	0.100497	Unchanged	0.900953
ENSG00000213753	transcribed_processed_pseudogene	CENPB DNA-binding domains containing 1 pseudogene 1 [Source:HGNC Symbol;Acc:HGNC:28421]	CENPBD1P1	0.0882281	5.04389	2.06625	0.150592	0.235755	Unchanged	1.06306
ENSG00000272888	lncRNA	CHD2 adjacent suppressive regulatory RNA [Source:HGNC Symbol;Acc:HGNC:48626]	CHASERR	0.27793	5.50486	30.6018	3.16803e-08	2.48216e-07	Unchanged	1.21245
ENSG00000205559	lncRNA	CHKB divergent transcript [Source:HGNC Symbol;Acc:HGNC:40146]	CHKB-DT	-0.323036	3.17699	8.36333	0.00382868	0.0105206	Down	0.799386
ENSG00000223960	lncRNA	cholesterol induced regulator of metabolism RNA [Source:HGNC Symbol;Acc:HGNC:54059]	CHROMR	0.18985	6.0389	13.1284	0.000290854	0.00108022	Unchanged	1.14065
ENSG00000247572	lncRNA	CKMT2 antisense RNA 1 [Source:HGNC Symbol;Acc:HGNC:48997]	CKMT2-AS1	0.0400099	4.47056	0.246835	0.619312	0.710624	Unchanged	1.02812
ENSG00000232000	transcribed_unprocessed_pseudogene	chloride voltage-gated channel 3 pseudogene 1 [Source:HGNC Symbol;Acc:HGNC:49775]	CLCN3P1	0.296379	5.63794	35.515	2.53089e-09	2.32025e-08	Unchanged	1.22806
ENSG00000131797	transcribed_unprocessed_pseudogene	clustered mitochondria homolog pseudogene 3 [Source:HGNC Symbol;Acc:HGNC:28447]	CLUHP3	-0.0550526	4.13013	0.347909	0.555299	0.657859	Unchanged	0.962559
ENSG00000235501	lncRNA	CNN3 divergent transcript [Source:HGNC Symbol;Acc:HGNC:54176]	CNN3-DT	0.362262	3.1166	11.9254	0.000553748	0.0019058	Up	1.28544
ENSG00000236088	lncRNA	COX10 antisense RNA 1 [Source:HGNC Symbol;Acc:HGNC:38873]	COX10-AS1	-0.168322	5.22201	10.3443	0.00129877	0.00405663	Unchanged	0.889877
ENSG00000235903	lncRNA	CPB2 antisense RNA 1 [Source:HGNC Symbol;Acc:HGNC:39898]	CPB2-AS1	-0.347027	2.45635	7.45579	0.00632326	0.0163194	Down	0.786203
ENSG00000245694	lncRNA	colorectal neoplasia differentially expressed [Source:HGNC Symbol;Acc:HGNC:37078]	CRNDE	0.110844	6.74179	6.75606	0.00934297	0.022769	Unchanged	1.07986
ENSG00000215908	transcribed_unprocessed_pseudogene	CROCC pseudogene 2 [Source:HGNC Symbol;Acc:HGNC:28170]	CROCCP2	-0.00833344	6.16322	0.0309011	0.860461	0.901381	Unchanged	0.99424
ENSG00000080947	transcribed_unprocessed_pseudogene	CROCC pseudogene 3 [Source:HGNC Symbol;Acc:HGNC:29405]	CROCCP3	0.154019	5.17668	5.19224	0.022688	0.0484712	Unchanged	1.11266
ENSG00000100058	transcribed_unprocessed_pseudogene	crystallin beta B2 pseudogene 1 [Source:HGNC Symbol;Acc:HGNC:2399]	CRYBB2P1	0.177412	3.69151	4.62577	0.0314951	0.0642318	Unchanged	1.13085
ENSG00000196810	lncRNA	CTBP1 divergent transcript [Source:HGNC Symbol;Acc:HGNC:28307]	CTBP1-DT	-0.0351597	5.0796	0.38914	0.532752	0.637827	Unchanged	0.975924
ENSG00000233937	lncRNA	uncharacterized LOC101928649 [Source:NCBI gene (formerly Entrezgene);Acc:101928649]	CTC-338M12.4	0.20029	3.78318	4.92561	0.0264614	0.0553785	Unchanged	1.14893
ENSG00000226752	transcribed_unitary_pseudogene	cutA divalent cation tolerance like, pseudogene [Source:HGNC Symbol;Acc:HGNC:27367]	CUTALP	0.151453	5.52177	7.39568	0.00653807	0.0167577	Unchanged	1.11069
ENSG00000226562	lncRNA	cytochrome P450 family 4 subfamily F member 26, pseudogene [Source:HGNC Symbol;Acc:HGNC:39948]	CYP4F26P	-0.127385	2.84487	1.14386	0.284839	0.39057	Unchanged	0.915489
ENSG00000226950	lncRNA	differentiation antagonizing non-protein coding RNA [Source:HGNC Symbol;Acc:HGNC:28964]	DANCR	-0.0300275	5.2699	0.361885	0.547461	0.650331	Unchanged	0.979402
ENSG00000235244	lncRNA	DXZ4 associated non-coding transcript 2, distal [Source:HGNC Symbol;Acc:HGNC:50862]	DANT2	0.113464	2.61565	0.508225	0.475908	0.585314	Unchanged	1.08182
ENSG00000214826	unprocessed_pseudogene	DEAD/H-box helicase 12, pseudogene [Source:HGNC Symbol;Acc:HGNC:2737]	DDX12P	-0.187771	3.76315	2.98597	0.0839889	0.145785	Unchanged	0.877961
ENSG00000273032	lncRNA	DiGeorge syndrome critical region gene 5 [Source:NCBI gene (formerly Entrezgene);Acc:26220]	DGCR5	-0.32417	4.65975	17.488	2.89121e-05	0.000134013	Down	0.798758
ENSG00000215256	lncRNA	DHRS4 antisense RNA 1 [Source:HGNC Symbol;Acc:HGNC:23175]	DHRS4-AS1	0.0917382	4.46674	1.74932	0.185962	0.278703	Unchanged	1.06565
ENSG00000235706	lncRNA	DICER1 antisense RNA 1 [Source:HGNC Symbol;Acc:HGNC:43017]	DICER1-AS1	0.139861	2.66174	1.25363	0.262861	0.367	Unchanged	1.1018
ENSG00000231607	lncRNA	deleted in lymphocytic leukemia 2 [Source:HGNC Symbol;Acc:HGNC:13748]	DLEU2	0.240669	4.34672	7.64278	0.0057	0.0149067	Unchanged	1.18154
ENSG00000231764	lncRNA	DLX6 antisense RNA 1 [Source:HGNC Symbol;Acc:HGNC:37151]	DLX6-AS1	-0.159875	4.58715	4.08821	0.0431832	0.0837502	Unchanged	0.895103
ENSG00000250091	lncRNA	dynein axonemal heavy chain 10 opposite strand [Source:HGNC Symbol;Acc:HGNC:37121]	DNAH10OS	-0.0124887	3.80001	0.0240796	0.876683	0.91399	Unchanged	0.991381
ENSG00000230630	lncRNA	DNM3 opposite strand/antisense RNA [Source:HGNC Symbol;Acc:HGNC:41228]	DNM3OS	0.373189	3.97788	17.9324	2.28889e-05	0.000108304	Up	1.29521
ENSG00000189212	transcribed_unprocessed_pseudogene	DPY19L2 pseudogene 1 [Source:HGNC Symbol;Acc:HGNC:22305]	DPY19L2P1	-0.226971	3.99941	6.36597	0.011633	0.027494	Unchanged	0.854427
ENSG00000170629	transcribed_unprocessed_pseudogene	DPY19L2 pseudogene 2 [Source:HGNC Symbol;Acc:HGNC:21764]	DPY19L2P2	-0.0378978	4.58813	0.361091	0.547901	0.650787	Unchanged	0.974073
ENSG00000243701	lncRNA	DPPA2 upstream binding RNA [Source:HGNC Symbol;Acc:HGNC:48569]	DUBR	-0.0413102	3.9785	0.273212	0.601185	0.695978	Unchanged	0.971772
ENSG00000244306	transcribed_processed_pseudogene	double homeobox A pseudogene 10 [Source:NCBI gene (formerly Entrezgene);Acc:503639]	DUXAP10	-0.153183	3.48659	2.14086	0.143422	0.226427	Unchanged	0.899264
ENSG00000206195	lncRNA	double homeobox A pseudogene 8 [Source:HGNC Symbol;Acc:HGNC:32187]	DUXAP8	0.108069	4.05766	2.06343	0.15087	0.236126	Unchanged	1.07778
ENSG00000281649	lncRNA	endogenous Bornavirus like nucleoprotein 3, pseudogene [Source:HGNC Symbol;Acc:HGNC:50682]	EBLN3P	0.144185	6.6509	12.6279	0.000380042	0.00137151	Unchanged	1.10511
ENSG00000228502	processed_pseudogene	eukaryotic translation elongation factor 1 alpha 1 pseudogene 11 [Source:HGNC Symbol;Acc:HGNC:3206]	EEF1A1P11	0.306414	3.29252	9.37366	0.00220126	0.00649064	Up	1.23663
ENSG00000196205	processed_pseudogene	eukaryotic translation elongation factor 1 alpha 1 pseudogene 5 [Source:HGNC Symbol;Acc:HGNC:3200]	EEF1A1P5	-0.0668613	2.90497	0.304388	0.581144	0.679615	Unchanged	0.954713
ENSG00000179523	lncRNA	EIF3J divergent transcript [Source:HGNC Symbol;Acc:HGNC:48616]	EIF3J-DT	0.234468	3.54148	6.98671	0.0082117	0.0203556	Unchanged	1.17647
ENSG00000180385	transcribed_unprocessed_pseudogene	EMC3 antisense RNA 1 [Source:HGNC Symbol;Acc:HGNC:49223]	EMC3-AS1	-0.29812	4.56406	14.914	0.000112523	0.000456712	Unchanged	0.813311
ENSG00000226688	lncRNA	ENTPD1 antisense RNA 1 [Source:HGNC Symbol;Acc:HGNC:45203]	ENTPD1-AS1	-0.126825	6.35438	8.30189	0.00396038	0.0108391	Unchanged	0.915845
ENSG00000185684	transcribed_unprocessed_pseudogene	EP400 pseudogene 1 [Source:HGNC Symbol;Acc:HGNC:26602]	EP400P1	-0.355302	5.00303	24.6492	6.87745e-07	4.3313e-06	Down	0.781706
ENSG00000224032	lncRNA	EPB41L4A antisense RNA 1 [Source:HGNC Symbol;Acc:HGNC:30749]	EPB41L4A-AS1	0.278112	4.9143	23.0036	1.61695e-06	9.59901e-06	Unchanged	1.21261
ENSG00000234690	lncRNA	EPCAM divergent transcript [Source:HGNC Symbol;Acc:HGNC:52639]	EPCAM-DT	0.435061	2.77848	13.1001	0.000295274	0.00109352	Up	1.35197
ENSG00000260565	lncRNA	endogenous retrovirus group K13 member 1 [Source:HGNC Symbol;Acc:HGNC:27548]	ERVK13-1	-0.00442625	4.81379	0.00457743	0.946059	0.962589	Unchanged	0.996937
ENSG00000221990	lncRNA	EXOC3 antisense RNA 1 [Source:HGNC Symbol;Acc:HGNC:25175]	EXOC3-AS1	0.286875	2.65806	6.13652	0.0132417	0.0307075	Unchanged	1.21999
ENSG00000231584	transcribed_unprocessed_pseudogene	fumarylacetoacetate hydrolase domain containing 2C, pseudogene [Source:HGNC Symbol;Acc:HGNC:44135]	FAHD2CP	0.17349	2.36087	1.65695	0.198016	0.292605	Unchanged	1.12778
ENSG00000226777	lncRNA	family with sequence similarity 30 member A [Source:HGNC Symbol;Acc:HGNC:19955]	FAM30A	-1.15173	3.04651	99.6703	1.80002e-23	7.50312e-22	Down	0.450085
ENSG00000226711	lncRNA	family with sequence similarity 66 member C [Source:HGNC Symbol;Acc:HGNC:21644]	FAM66C	0.408061	2.47021	9.09287	0.00256608	0.00739696	Up	1.3269
ENSG00000173295	transcribed_unprocessed_pseudogene	family with sequence similarity 86 member B3, pseudogene [Source:HGNC Symbol;Acc:HGNC:44371]	FAM86B3P	-0.225475	3.37976	5.32024	0.0210791	0.0455547	Unchanged	0.855313
ENSG00000158483	transcribed_unprocessed_pseudogene	family with sequence similarity 86 member C1, pseudogene [Source:HGNC Symbol;Acc:HGNC:25561]	FAM86C1P	-0.354058	3.0184	11.1939	0.000820658	0.0027078	Down	0.782381
ENSG00000160172	transcribed_unprocessed_pseudogene	family with sequence similarity 86 member C2, pseudogene [Source:HGNC Symbol;Acc:HGNC:42392]	FAM86C2P	-0.312046	2.56163	4.74331	0.0294124	0.0605491	Unchanged	0.805499
ENSG00000244026	transcribed_unprocessed_pseudogene	family with sequence similarity 86 member D, pseudogene [Source:HGNC Symbol;Acc:HGNC:32659]	FAM86DP	-0.136014	3.33083	1.79994	0.179719	0.271503	Unchanged	0.91003
ENSG00000171084	transcribed_unprocessed_pseudogene	family with sequence similarity 86 member J, pseudogene [Source:HGNC Symbol;Acc:HGNC:44097]	FAM86JP	-0.205605	2.53041	2.66764	0.102407	0.17221	Unchanged	0.867175
ENSG00000260852	lncRNA	FBXL19 antisense RNA 1 [Source:HGNC Symbol;Acc:HGNC:27557]	FBXL19-AS1	0.066715	3.72358	0.682504	0.408726	0.519869	Unchanged	1.04733
ENSG00000225733	lncRNA	FGD5 antisense RNA 1 [Source:HGNC Symbol;Acc:HGNC:40410]	FGD5-AS1	-0.225214	8.09195	52.6516	3.98281e-13	6.27929e-12	Unchanged	0.855468
ENSG00000179743	lncRNA	uncharacterized LOC729614 [Source:NCBI gene (formerly Entrezgene);Acc:729614]	FLJ37453	0.470337	2.77561	13.6852	0.000216156	0.000825038	Up	1.38543
ENSG00000198468	lncRNA	FLVCR1 divergent transcript [Source:HGNC Symbol;Acc:HGNC:39077]	FLVCR1-DT	-0.0999435	2.91372	0.844897	0.358	0.466964	Unchanged	0.93307
ENSG00000257800	processed_pseudogene	formin binding protein 1 pseudogene 1 [Source:HGNC Symbol;Acc:HGNC:44528]	FNBP1P1	0.211299	3.79879	7.2252	0.00718873	0.0181725	Unchanged	1.15773
ENSG00000149531	unprocessed_pseudogene	FSHD region gene 1 family member B, pseudogene [Source:HGNC Symbol;Acc:HGNC:15792]	FRG1BP	-0.118692	3.44767	1.79986	0.179729	0.271503	Unchanged	0.921022
ENSG00000282826	transcribed_unprocessed_pseudogene	FSHD region gene 1 family member C, pseudogene [Source:HGNC Symbol;Acc:HGNC:51762]	FRG1CP	-0.0858826	4.71285	1.62137	0.202901	0.29834	Unchanged	0.942208
ENSG00000282870	unprocessed_pseudogene	FSHD region gene 1 family member D, pseudogene [Source:HGNC Symbol;Acc:HGNC:51763]	FRG1DP	0.16544	2.57785	1.76666	0.183796	0.276171	Unchanged	1.12151
ENSG00000282995	unprocessed_pseudogene	FSHD region gene 1 family member E, pseudogene [Source:HGNC Symbol;Acc:HGNC:51764]	FRG1EP	-0.0879511	2.75014	0.553385	0.456938	0.567402	Unchanged	0.940858
ENSG00000283023	unprocessed_pseudogene	FSHD region gene 1 family member G, pseudogene [Source:HGNC Symbol;Acc:HGNC:51766]	FRG1GP	-0.147983	2.84909	1.67634	0.195412	0.289421	Unchanged	0.902512
ENSG00000276291	transcribed_unprocessed_pseudogene	FSHD region gene 1 family member H, pseudogene [Source:HGNC Symbol;Acc:HGNC:51767]	FRG1HP	0.116962	3.70797	2.07349	0.149878	0.234923	Unchanged	1.08445
ENSG00000230590	lncRNA	FTX transcript, XIST regulator [Source:HGNC Symbol;Acc:HGNC:37190]	FTX	0.106918	7.14961	0.900866	0.34255	0.450973	Unchanged	1.07693
ENSG00000244879	lncRNA	GABPB1 antisense RNA 1 [Source:HGNC Symbol;Acc:HGNC:44157]	GABPB1-AS1	0.461566	8.13326	83.8802	5.25672e-20	1.6781e-18	Up	1.37704
ENSG00000285410	lncRNA	GABPB1 intronic transcript [Source:HGNC Symbol;Acc:HGNC:25469]	GABPB1-IT1	0.43125	5.51032	67.5569	2.04691e-16	4.63273e-15	Up	1.3484
ENSG00000196295	lncRNA	GARS1 divergent transcript [Source:HGNC Symbol;Acc:HGNC:48951]	GARS1-DT	0.145407	6.15903	7.85179	0.00507704	0.0134534	Unchanged	1.10604
ENSG00000234741	lncRNA	growth arrest specific 5 [Source:HGNC Symbol;Acc:HGNC:16355]	GAS5	-0.0321359	7.6469	0.724987	0.394513	0.505374	Unchanged	0.977971
ENSG00000244300	lncRNA	GATA2 antisense RNA 1 [Source:HGNC Symbol;Acc:HGNC:51108]	GATA2-AS1	0.0183811	4.48552	0.0647691	0.799111	0.857575	Unchanged	1.01282
ENSG00000197308	lncRNA	GATA3 antisense RNA 1 [Source:HGNC Symbol;Acc:HGNC:33786]	GATA3-AS1	0.404755	5.1917	35.5807	2.44701e-09	2.24869e-08	Up	1.32386
ENSG00000160766	transcribed_unprocessed_pseudogene	glucosylceramidase beta pseudogene 1 [Source:HGNC Symbol;Acc:HGNC:4178]	GBAP1	0.0146245	3.66813	0.0234947	0.878178	0.914986	Unchanged	1.01019
ENSG00000257698	lncRNA	GIHCG inhibitor of miR-200b/200a/429 expression [Source:HGNC Symbol;Acc:HGNC:52649]	GIHCG	0.30942	3.19759	9.54164	0.00200862	0.00596699	Up	1.23921
ENSG00000250903	lncRNA	GMDS divergent transcript [Source:HGNC Symbol;Acc:HGNC:48993]	GMDS-DT	0.231447	2.58477	3.78812	0.0516177	0.0971015	Unchanged	1.17401
ENSG00000255769	transcribed_unprocessed_pseudogene	GOLGA2 pseudogene 10 [Source:HGNC Symbol;Acc:HGNC:26229]	GOLGA2P10	0.146211	3.32992	1.99297	0.158031	0.245089	Unchanged	1.10666
ENSG00000238105	transcribed_unprocessed_pseudogene	GOLGA2 pseudogene 5 [Source:HGNC Symbol;Acc:HGNC:25315]	GOLGA2P5	0.325591	4.43684	14.9288	0.000111645	0.000453946	Up	1.25318
ENSG00000228203	lncRNA	glycosaminoglycan regulatory associated long non-coding RNA [Source:HGNC Symbol;Acc:HGNC:30963]	GRASLND	0.376	3.15168	13.8956	0.000193247	0.000745701	Up	1.29774
ENSG00000233073	lncRNA	GRM3 antisense RNA 1 [Source:HGNC Symbol;Acc:HGNC:40264]	GRM3-AS1	-0.0710743	2.94236	0.400379	0.526894	0.632316	Unchanged	0.951929
ENSG00000245857	lncRNA	uncharacterized LOC100652791 [Source:NCBI gene (formerly Entrezgene);Acc:100652791]	GS1-24F4.2	-0.171949	2.69825	1.7217	0.189474	0.28295	Unchanged	0.887643
ENSG00000283050	transcribed_unprocessed_pseudogene	general transcription factor IIi pseudogene 12 [Source:HGNC Symbol;Acc:HGNC:51723]	GTF2IP12	-0.170842	4.15035	4.67311	0.0306384	0.0626942	Unchanged	0.888324
ENSG00000272556	transcribed_unprocessed_pseudogene	general transcription factor IIi pseudogene 13 [Source:HGNC Symbol;Acc:HGNC:51725]	GTF2IP13	0.144078	4.18084	2.33248	0.1267	0.204598	Unchanged	1.10502
ENSG00000272645	transcribed_unprocessed_pseudogene	general transcription factor IIi pseudogene 20 [Source:HGNC Symbol;Acc:HGNC:51732]	GTF2IP20	0.0137857	3.77294	0.0204856	0.886189	0.920753	Unchanged	1.0096
ENSG00000233369	transcribed_processed_pseudogene	general transcription factor IIi pseudogene 4 [Source:HGNC Symbol;Acc:HGNC:51716]	GTF2IP4	0.179676	4.3101	6.46063	0.011029	0.0261916	Unchanged	1.13263
ENSG00000183666	transcribed_unprocessed_pseudogene	GUSB pseudogene 1 [Source:HGNC Symbol;Acc:HGNC:13670]	GUSBP1	0.0886795	3.23928	0.850689	0.356357	0.465502	Unchanged	1.0634
ENSG00000228315	lncRNA	GUSB pseudogene 11 [Source:HGNC Symbol;Acc:HGNC:42325]	GUSBP11	-0.139356	3.79066	2.83656	0.0921413	0.157622	Unchanged	0.907924
ENSG00000206417	lncRNA	H1-10 antisense RNA 1 [Source:HGNC Symbol;Acc:HGNC:27953]	H1-10-AS1	0.630208	4.34208	36.76	1.33605e-09	1.26488e-08	Up	1.54779
ENSG00000130600	lncRNA	H19 imprinted maternally expressed transcript [Source:HGNC Symbol;Acc:HGNC:4713]	H19	-0.198877	6.61455	7.35053	0.0067043	0.0171198	Unchanged	0.871228
ENSG00000220323	transcribed_unprocessed_pseudogene	H2B clustered histone 19, pseudogene [Source:HGNC Symbol;Acc:HGNC:20517]	H2BC19P	0.381346	3.1905	12.7499	0.000356037	0.00129334	Up	1.30256
ENSG00000261716	transcribed_unprocessed_pseudogene	H2B clustered histone 20, pseudogene [Source:HGNC Symbol;Acc:HGNC:20516]	H2BC20P	0.370673	3.97524	21.1156	4.32385e-06	2.3679e-05	Up	1.29296
ENSG00000224189	lncRNA	HOXD antisense growth-associated long non-coding RNA [Source:HGNC Symbol;Acc:HGNC:43755]	HAGLR	0.0458308	3.24762	0.204233	0.651326	0.738437	Unchanged	1.03228
ENSG00000237125	lncRNA	HAND2 antisense RNA 1 [Source:HGNC Symbol;Acc:HGNC:48872]	HAND2-AS1	0.412132	9.3919	114.054	1.26833e-26	6.68064e-25	Up	1.33065
ENSG00000231074	lncRNA	HLA complex group 18 [Source:HGNC Symbol;Acc:HGNC:31337]	HCG18	0.139209	7.15091	7.40931	0.00648872	0.01665	Unchanged	1.1013
ENSG00000278970	lncRNA	hepatocellular carcinoma up-regulated EZH2-associated long non-coding RNA [Source:HGNC Symbol;Acc:HGNC:45049]	HEIH	-0.209516	3.96641	6.53102	0.0106009	0.0254123	Unchanged	0.864827
ENSG00000281344	lncRNA	HELLP associated long non-coding RNA [Source:HGNC Symbol;Acc:HGNC:43984]	HELLPAR	0.00711218	3.70406	0.00433377	0.947512	0.963307	Unchanged	1.00494
ENSG00000276550	transcribed_unprocessed_pseudogene	hect domain and RLD 2 pseudogene 2 [Source:HGNC Symbol;Acc:HGNC:4870]	HERC2P2	-0.239841	5.37104	10.1649	0.0014314	0.00442675	Unchanged	0.846839
ENSG00000180229	transcribed_unprocessed_pseudogene	hect domain and RLD 2 pseudogene 3 [Source:HGNC Symbol;Acc:HGNC:4871]	HERC2P3	0.0585047	5.2176	1.19533	0.274256	0.379699	Unchanged	1.04139
ENSG00000206149	transcribed_unprocessed_pseudogene	hect domain and RLD 2 pseudogene 9 [Source:HGNC Symbol;Acc:HGNC:30495]	HERC2P9	-0.100027	3.9079	1.67791	0.195203	0.289259	Unchanged	0.933016
ENSG00000272711	lncRNA	HK2 divergent transcript [Source:HGNC Symbol;Acc:HGNC:55204]	HK2-DT	-0.219843	3.0897	4.37075	0.0365609	0.0728704	Unchanged	0.858659
ENSG00000237380	lncRNA	HOXD cluster antisense RNA 2 [Source:HGNC Symbol;Acc:HGNC:43756]	HOXD-AS2	0.0140925	2.74256	0.0155712	0.900694	0.930899	Unchanged	1.00982
ENSG00000235092	lncRNA	ID2 antisense RNA 1 [Source:HGNC Symbol;Acc:HGNC:51103]	ID2-AS1	0.45722	3.71381	29.6267	5.23777e-08	3.96442e-07	Up	1.37289
ENSG00000267100	lncRNA	ILF3 divergent transcript [Source:HGNC Symbol;Acc:HGNC:27115]	ILF3-DT	0.305857	4.38171	21.5869	3.38155e-06	1.90036e-05	Up	1.23615
ENSG00000269837	transcribed_processed_pseudogene	importin 5 pseudogene 1 [Source:HGNC Symbol;Acc:HGNC:49687]	IPO5P1	0.0169275	4.31541	0.0633053	0.801346	0.859496	Unchanged	1.0118
ENSG00000259673	lncRNA	IQCH antisense RNA 1 [Source:HGNC Symbol;Acc:HGNC:44104]	IQCH-AS1	-0.0861801	2.65069	0.489887	0.483978	0.593286	Unchanged	0.942014
ENSG00000235257	lncRNA	ITGA9 antisense RNA 1 [Source:HGNC Symbol;Acc:HGNC:49668]	ITGA9-AS1	0.196947	2.91635	2.32522	0.127292	0.205326	Unchanged	1.14627
ENSG00000225470	lncRNA	JPX transcript, XIST activator [Source:HGNC Symbol;Acc:HGNC:37191]	JPX	0.00743831	6.72192	0.0173498	0.895207	0.92713	Unchanged	1.00517
ENSG00000269821	lncRNA	KCNQ1 opposite strand/antisense transcript 1 [Source:HGNC Symbol;Acc:HGNC:6295]	KCNQ1OT1	0.114522	6.80656	1.40626	0.235678	0.336127	Unchanged	1.08262
ENSG00000246174	lncRNA	KCTD21 antisense RNA 1 [Source:HGNC Symbol;Acc:HGNC:48674]	KCTD21-AS1	0.118557	2.79201	0.960095	0.327163	0.434916	Unchanged	1.08565
ENSG00000231160	lncRNA	KLF3 antisense RNA 1 [Source:HGNC Symbol;Acc:HGNC:25796]	KLF3-AS1	0.263966	2.9874	4.55495	0.0328237	0.0664725	Unchanged	1.20078
ENSG00000256667	transcribed_unprocessed_pseudogene	killer cell lectin like receptor A1, pseudogene [Source:HGNC Symbol;Acc:HGNC:6372]	KLRA1P	-0.264617	3.46179	6.86475	0.00879127	0.0215925	Unchanged	0.83242
ENSG00000229320	transcribed_processed_pseudogene	keratin 8 pseudogene 12 [Source:HGNC Symbol;Acc:HGNC:28057]	KRT8P12	-0.141617	2.46153	1.10928	0.292239	0.398923	Unchanged	0.906502
ENSG00000233930	lncRNA	KRTAP5-1/KRTAP5-2 antisense RNA 1 [Source:HGNC Symbol;Acc:HGNC:27877]	KRTAP5-AS1	0.45998	3.18498	16.6032	4.60743e-05	0.000205034	Up	1.37552
ENSG00000186615	lncRNA	KTN1 antisense RNA 1 [Source:HGNC Symbol;Acc:HGNC:19842]	KTN1-AS1	0.102829	2.73147	0.786791	0.375072	0.485624	Unchanged	1.07388
ENSG00000224699	lncRNA	LAMTOR5 antisense RNA 1 [Source:HGNC Symbol;Acc:HGNC:40823]	LAMTOR5-AS1	0.209773	3.00177	3.41001	0.0648022	0.117608	Unchanged	1.15651
ENSG00000179406	lncRNA	long intergenic non-protein coding RNA 174 [Source:HGNC Symbol;Acc:HGNC:27788]	LINC00174	0.173251	4.31072	4.26537	0.0388968	0.0766037	Unchanged	1.1276
ENSG00000223768	lncRNA	long intergenic non-protein coding RNA 205 [Source:HGNC Symbol;Acc:HGNC:16420]	LINC00205	0.029563	6.44606	0.602947	0.437456	0.548144	Unchanged	1.0207
ENSG00000270816	lncRNA	long intergenic non-protein coding RNA 221 [Source:HGNC Symbol;Acc:HGNC:20169]	LINC00221	-0.0781105	5.7103	3.10109	0.07824	0.137725	Unchanged	0.947298
ENSG00000188185	lncRNA	long intergenic non-protein coding RNA 265 [Source:HGNC Symbol;Acc:HGNC:28019]	LINC00265	-0.0159595	4.34534	0.0499826	0.823094	0.87577	Unchanged	0.988999
ENSG00000280798	lncRNA	long intergenic non-protein coding RNA 294 [Source:HGNC Symbol;Acc:HGNC:27456]	LINC00294	0.0614463	5.44277	1.49656	0.221201	0.319651	Unchanged	1.04351
ENSG00000218510	lncRNA	long intergenic non-protein coding RNA 339 [Source:HGNC Symbol;Acc:HGNC:25011]	LINC00339	0.152906	3.56013	1.95094	0.162486	0.25065	Unchanged	1.11181
ENSG00000232931	lncRNA	long intergenic non-protein coding RNA 342 [Source:HGNC Symbol;Acc:HGNC:42470]	LINC00342	0.0682177	6.31532	0.92661	0.335745	0.444185	Unchanged	1.04842
ENSG00000153363	lncRNA	long intergenic non-protein coding RNA 467 [Source:HGNC Symbol;Acc:HGNC:28227]	LINC00467	0.15176	3.86848	3.54853	0.0595981	0.109658	Unchanged	1.11092
ENSG00000175611	lncRNA	long intergenic non-protein coding RNA 476 [Source:HGNC Symbol;Acc:HGNC:27858]	LINC00476	0.120351	3.11743	1.49878	0.220859	0.319235	Unchanged	1.087
ENSG00000223546	lncRNA	long intergenic non-protein coding RNA 630 [Source:HGNC Symbol;Acc:HGNC:44263]	LINC00630	0.424885	3.27837	19.3394	1.09423e-05	5.53707e-05	Up	1.34247
ENSG00000203930	lncRNA	long intergenic non-protein coding RNA 632 [Source:HGNC Symbol;Acc:HGNC:27865]	LINC00632	0.384332	5.32804	33.9339	5.70177e-09	4.97531e-08	Up	1.30525
ENSG00000258441	lncRNA	long intergenic non-protein coding RNA 641 [Source:HGNC Symbol;Acc:HGNC:27511]	LINC00641	-0.21108	7.49246	36.7207	1.36324e-09	1.28642e-08	Unchanged	0.863891
ENSG00000261824	lncRNA	long intergenic non-protein coding RNA 662 [Source:HGNC Symbol;Acc:HGNC:27122]	LINC00662	-0.0516251	5.73972	0.734936	0.391288	0.502187	Unchanged	0.964849
ENSG00000232677	lncRNA	long intergenic non-protein coding RNA 665 [Source:HGNC Symbol;Acc:HGNC:44323]	LINC00665	0.147255	5.38539	8.37734	0.00379929	0.0104476	Unchanged	1.10746
ENSG00000263753	lncRNA	long intergenic non-protein coding RNA 667 [Source:HGNC Symbol;Acc:HGNC:27906]	LINC00667	0.0741632	5.49122	2.47796	0.115452	0.189794	Unchanged	1.05275
ENSG00000237854	transcribed_unprocessed_pseudogene	long intergenic non-protein coding RNA 674 [Source:HGNC Symbol;Acc:HGNC:44355]	LINC00674	0.168506	3.68331	3.33973	0.0676257	0.121873	Unchanged	1.12389
ENSG00000215190	transcribed_unprocessed_pseudogene	long intergenic non-protein coding RNA 680 [Source:HGNC Symbol;Acc:HGNC:44417]	LINC00680	0.183745	3.91833	3.68866	0.0547835	0.101948	Unchanged	1.13583
ENSG00000245870	lncRNA	long intergenic non-protein coding RNA 682 [Source:HGNC Symbol;Acc:HGNC:44466]	LINC00682	0.0111866	5.36582	0.0501449	0.822811	0.87555	Unchanged	1.00778
ENSG00000185904	lncRNA	long intergenic non-protein coding RNA 839 [Source:HGNC Symbol;Acc:HGNC:28269]	LINC00839	0.0602855	5.35081	1.22499	0.268383	0.372949	Unchanged	1.04267
ENSG00000245060	lncRNA	long intergenic non-protein coding RNA 847 [Source:HGNC Symbol;Acc:HGNC:45050]	LINC00847	0.162799	3.0334	1.9503	0.162554	0.250722	Unchanged	1.11946
ENSG00000224914	lncRNA	long intergenic non-protein coding RNA 863 [Source:HGNC Symbol;Acc:HGNC:45162]	LINC00863	0.106809	3.10667	0.888803	0.345802	0.45448	Unchanged	1.07684
ENSG00000233058	lncRNA	long intergenic non-protein coding RNA 884 [Source:HGNC Symbol;Acc:HGNC:48570]	LINC00884	0.116952	2.51959	0.803506	0.370047	0.48003	Unchanged	1.08444
ENSG00000240024	transcribed_unprocessed_pseudogene	long intergenic non-protein coding RNA 888 [Source:HGNC Symbol;Acc:HGNC:48575]	LINC00888	-0.276311	3.41376	9.57825	0.00196896	0.00586637	Unchanged	0.8257
ENSG00000264247	lncRNA	ZNF407 antisense RNA 1 [Source:HGNC Symbol;Acc:HGNC:44331]	LINC00909	0.1949	4.5694	6.04363	0.0139566	0.0320518	Unchanged	1.14465
ENSG00000188825	lncRNA	long intergenic non-protein coding RNA 910 [Source:HGNC Symbol;Acc:HGNC:44361]	LINC00910	0.20774	3.10861	3.49418	0.0615849	0.112794	Unchanged	1.15488
ENSG00000204054	lncRNA	long intergenic non-protein coding RNA 963 [Source:HGNC Symbol;Acc:HGNC:48716]	LINC00963	0.105238	3.86129	1.30701	0.252937	0.356184	Unchanged	1.07567
ENSG00000281332	lncRNA	long intergenic non-protein coding RNA 997 [Source:HGNC Symbol;Acc:HGNC:48952]	LINC00997	0.0865453	3.0116	0.56206	0.453431	0.563954	Unchanged	1.06182
ENSG00000261455	lncRNA	long intergenic non-protein coding RNA 1003 [Source:HGNC Symbol;Acc:HGNC:48957]	LINC01003	0.0313291	3.08812	0.101521	0.750012	0.819842	Unchanged	1.02195
ENSG00000182648	lncRNA	long intergenic non-protein coding RNA 1006 [Source:HGNC Symbol;Acc:HGNC:48971]	LINC01006	-0.140507	3.76965	2.80029	0.0942473	0.160727	Unchanged	0.9072
ENSG00000230426	lncRNA	long intergenic non-protein coding RNA 1036 [Source:HGNC Symbol;Acc:HGNC:49024]	LINC01036	0.1584	2.88956	2.31678	0.127984	0.206213	Unchanged	1.11605
ENSG00000212694	lncRNA	long intergenic non-protein coding RNA 1089 [Source:HGNC Symbol;Acc:HGNC:27886]	LINC01089	0.344658	3.66961	11.2055	0.00081555	0.00269277	Up	1.26985
ENSG00000235597	lncRNA	long intergenic non-protein coding RNA 1102 [Source:HGNC Symbol;Acc:HGNC:27165]	LINC01102	0.246902	2.92857	4.64549	0.0311352	0.0635986	Unchanged	1.18666
ENSG00000163364	lncRNA	long intergenic non-protein coding RNA 1116 [Source:HGNC Symbol;Acc:HGNC:49259]	LINC01116	0.339766	2.74792	7.54514	0.0060172	0.0156085	Up	1.26555
ENSG00000228794	lncRNA	long intergenic non-protein coding RNA 1128 [Source:HGNC Symbol;Acc:HGNC:49377]	LINC01128	-0.486751	5.0068	75.0789	4.52267e-18	1.20757e-16	Down	0.71363
ENSG00000281404	lncRNA	long intergenic non-protein coding RNA 1176 [Source:HGNC Symbol;Acc:HGNC:49548]	LINC01176	-0.0707588	2.77901	0.230935	0.630831	0.720559	Unchanged	0.952137
ENSG00000245937	lncRNA	long intergenic non-protein coding RNA 1184 [Source:HGNC Symbol;Acc:HGNC:49565]	LINC01184	0.0267036	4.47014	0.115533	0.73393	0.806829	Unchanged	1.01868
ENSG00000269416	lncRNA	long intergenic non-protein coding RNA 1224 [Source:HGNC Symbol;Acc:HGNC:49676]	LINC01224	-0.14202	5.05153	6.66871	0.009812	0.023767	Unchanged	0.906249
ENSG00000249550	lncRNA	long intergenic non-protein coding RNA 1234 [Source:HGNC Symbol;Acc:HGNC:49757]	LINC01234	0.154279	3.24573	2.61086	0.106134	0.177216	Unchanged	1.11287
ENSG00000237940	lncRNA	long intergenic non-protein coding RNA 1238 [Source:HGNC Symbol;Acc:HGNC:49795]	LINC01238	0.0200782	3.41289	0.0385451	0.844353	0.890622	Unchanged	1.01401
ENSG00000234423	lncRNA	long intergenic non-protein coding RNA 1250 [Source:HGNC Symbol;Acc:HGNC:49844]	LINC01250	0.417918	2.8587	14.4764	0.000141926	0.000563233	Up	1.336
ENSG00000203999	lncRNA	long intergenic non-protein coding RNA 1270 [Source:HGNC Symbol;Acc:HGNC:27658]	LINC01270	0.29506	3.52161	10.3568	0.00128999	0.00403249	Unchanged	1.22694
ENSG00000235437	lncRNA	long intergenic non-protein coding RNA 1278 [Source:HGNC Symbol;Acc:HGNC:28090]	LINC01278	0.136747	4.71146	3.35428	0.0670305	0.121083	Unchanged	1.09942
ENSG00000227953	lncRNA	long intergenic non-protein coding RNA 1341 [Source:HGNC Symbol;Acc:HGNC:49457]	LINC01341	0.270557	2.54741	4.85	0.0276461	0.0574951	Unchanged	1.20627
ENSG00000261326	lncRNA	long intergenic non-protein coding RNA 1355 [Source:HGNC Symbol;Acc:HGNC:50584]	LINC01355	0.0225215	4.5055	0.0497256	0.823541	0.876085	Unchanged	1.01573
ENSG00000238113	lncRNA	long intergenic non-protein coding RNA 1410 [Source:HGNC Symbol;Acc:HGNC:50702]	LINC01410	0.289939	2.56474	5.67077	0.0172498	0.0383521	Unchanged	1.22259
ENSG00000228065	lncRNA	long intergenic non-protein coding RNA 1515 [Source:HGNC Symbol;Acc:HGNC:51210]	LINC01515	0.207613	4.99105	13.0713	0.00029985	0.00110799	Unchanged	1.15478
ENSG00000233515	lncRNA	long intergenic non-protein coding RNA 1518 [Source:HGNC Symbol;Acc:HGNC:51216]	LINC01518	0.664065	2.48917	28.0475	1.18376e-07	8.50427e-07	Up	1.58454
ENSG00000213888	lncRNA	long intergenic non-protein coding RNA 1521 [Source:HGNC Symbol;Acc:HGNC:26029]	LINC01521	0.217288	4.1385	4.7938	0.0285623	0.0590404	Unchanged	1.16255
ENSG00000183250	lncRNA	long intergenic non-protein coding RNA 1547 [Source:HGNC Symbol;Acc:HGNC:15707]	LINC01547	-0.0715218	2.82818	0.402035	0.52604	0.631553	Unchanged	0.951634
ENSG00000261008	lncRNA	long intergenic non-protein coding RNA 1572 [Source:HGNC Symbol;Acc:HGNC:51385]	LINC01572	0.528216	3.24242	30.0624	4.18357e-08	3.21267e-07	Up	1.44214
ENSG00000233922	lncRNA	long intergenic non-protein coding RNA 1694 [Source:HGNC Symbol;Acc:HGNC:52481]	LINC01694	0.40605	3.77139	24.9018	6.03272e-07	3.85588e-06	Up	1.32505
ENSG00000232812	lncRNA	long intergenic non-protein coding RNA 1717 [Source:HGNC Symbol;Acc:HGNC:52504]	LINC01717	-0.314728	2.57847	5.73741	0.0166072	0.037087	Down	0.804003
ENSG00000233396	lncRNA	long intergenic non-protein coding RNA 1719 [Source:HGNC Symbol;Acc:HGNC:52506]	LINC01719	0.0357821	2.86628	0.109217	0.741037	0.812714	Unchanged	1.02511
ENSG00000226053	lncRNA	long intergenic non-protein coding RNA 1776 [Source:HGNC Symbol;Acc:HGNC:52566]	LINC01776	0.806139	2.0005	28.6512	8.66618e-08	6.35593e-07	Up	1.74853
ENSG00000259439	lncRNA	long intergenic non-protein coding RNA 1833 [Source:HGNC Symbol;Acc:HGNC:52644]	LINC01833	0.396588	5.39401	62.0231	3.39445e-15	6.81713e-14	Up	1.31639
ENSG00000248727	lncRNA	long intergenic non-protein coding RNA 1948 [Source:HGNC Symbol;Acc:HGNC:52772]	LINC01948	0.52567	2.99558	19.8571	8.34542e-06	4.30765e-05	Up	1.4396
ENSG00000260804	lncRNA	long intergenic non-protein coding RNA 1963 [Source:HGNC Symbol;Acc:HGNC:25283]	LINC01963	-0.273236	6.13199	39.7099	2.94626e-10	3.10658e-09	Unchanged	0.827461
ENSG00000273033	lncRNA	long intergenic non-protein coding RNA 2035 [Source:HGNC Symbol;Acc:HGNC:52875]	LINC02035	-0.104142	3.71837	1.2727	0.25926	0.363322	Unchanged	0.930358
ENSG00000204650	transcribed_unitary_pseudogene	long intergenic non-protein coding RNA 2210 [Source:HGNC Symbol;Acc:HGNC:26327]	LINC02210	0.20298	5.60758	14.0718	0.000175958	0.000683542	Unchanged	1.15107
ENSG00000248174	lncRNA	long intergenic non-protein coding RNA 2268 [Source:HGNC Symbol;Acc:HGNC:53183]	LINC02268	0.533013	5.47957	75.1075	4.45775e-18	1.19299e-16	Up	1.44695
ENSG00000250742	lncRNA	long intergenic non-protein coding RNA 2381 [Source:HGNC Symbol;Acc:HGNC:53304]	LINC02381	0.0217159	3.49681	0.0512494	0.820903	0.874242	Unchanged	1.01517
ENSG00000249896	transcribed_unprocessed_pseudogene	long intergenic non-protein coding RNA 2495 [Source:HGNC Symbol;Acc:HGNC:27728]	LINC02495	-0.552907	4.0615	46.6293	8.57697e-12	1.15168e-10	Down	0.681645
ENSG00000228709	lncRNA	long intergenic non-protein coding RNA 2575 [Source:HGNC Symbol;Acc:HGNC:53747]	LINC02575	1.42	3.14029	181.069	2.8313e-41	3.52786e-39	Up	2.67585
ENSG00000223764	lncRNA	long intergenic non-protein coding RNA 2593 [Source:HGNC Symbol;Acc:HGNC:53933]	LINC02593	-1.20949	4.19724	214.515	1.42223e-48	2.45982e-46	Down	0.43242
ENSG00000273142	lncRNA	long intergenic non-protein coding RNA 2604 [Source:HGNC Symbol;Acc:HGNC:53972]	LINC02604	0.198081	3.74784	3.53564	0.0600631	0.11036	Unchanged	1.14717
ENSG00000261618	lncRNA	long intergenic non-protein coding RNA 2605 [Source:HGNC Symbol;Acc:HGNC:53974]	LINC02605	0.847179	3.1897	57.5663	3.26781e-14	5.83472e-13	Up	1.79898
ENSG00000258913	lncRNA	long intergenic non-protein coding RNA 2691 [Source:HGNC Symbol;Acc:HGNC:20358]	LINC02691	-0.838404	3.54533	55.8963	7.63943e-14	1.31539e-12	Down	0.559262
ENSG00000212719	lncRNA	long intergenic non-protein coding RNA 2693 [Source:HGNC Symbol;Acc:HGNC:27904]	LINC02693	-0.351171	3.85511	20.8847	4.87764e-06	2.64245e-05	Down	0.783947
ENSG00000255433	lncRNA	long intergenic non-protein coding RNA 2735 [Source:HGNC Symbol;Acc:HGNC:54252]	LINC02735	-0.540829	3.6356	23.7841	1.07768e-06	6.57619e-06	Down	0.687376
ENSG00000226581	lncRNA	long intergenic non-protein coding RNA 2848 [Source:HGNC Symbol;Acc:HGNC:54384]	LINC02848	0.395336	2.59816	10.1153	0.0014704	0.00453539	Up	1.31525
ENSG00000100068	transcribed_unprocessed_pseudogene	LDL receptor related protein 5 like [Source:HGNC Symbol;Acc:HGNC:25323]	LRP5L	0.0574049	3.5272	0.3684	0.543878	0.647461	Unchanged	1.04059
ENSG00000214425	transcribed_unprocessed_pseudogene	leucine rich repeat containing 37 member A4, pseudogene [Source:HGNC Symbol;Acc:HGNC:25479]	LRRC37A4P	0.0926642	4.96006	2.04299	0.152909	0.238609	Unchanged	1.06634
ENSG00000250462	transcribed_unprocessed_pseudogene	leucine rich repeat containing 37B pseudogene 1 [Source:HGNC Symbol;Acc:HGNC:25390]	LRRC37BP1	0.056039	3.55759	0.271155	0.602558	0.697059	Unchanged	1.03961
ENSG00000231999	lncRNA	LRRC8C divergent transcript [Source:HGNC Symbol;Acc:HGNC:53731]	LRRC8C-DT	0.146818	2.36404	1.29166	0.255742	0.359566	Unchanged	1.10713
ENSG00000272142	lncRNA	LYRM4 antisense RNA 1 [Source:NCBI gene (formerly Entrezgene);Acc:100129461]	LYRM4-AS1	-0.0334327	2.6794	0.0710041	0.78988	0.850643	Unchanged	0.977093
ENSG00000265688	lncRNA	MAFG divergent transcript [Source:HGNC Symbol;Acc:HGNC:43649]	MAFG-DT	-0.215329	3.12688	4.4865	0.0341636	0.0688021	Unchanged	0.86135
ENSG00000234456	lncRNA	MAGI2 antisense RNA 3 [Source:HGNC Symbol;Acc:HGNC:40862]	MAGI2-AS3	-0.0377996	7.8193	0.72327	0.395073	0.505869	Unchanged	0.97414
ENSG00000253320	lncRNA	macrophage interferon regulatory lncRNA [Source:HGNC Symbol;Acc:HGNC:51558]	MAILR	-0.0517963	3.58512	0.30369	0.581579	0.679985	Unchanged	0.964734
ENSG00000251562	lncRNA	metastasis associated lung adenocarcinoma transcript 1 [Source:HGNC Symbol;Acc:HGNC:29665]	MALAT1	0.304784	10.9394	16.1683	5.79556e-05	0.000251638	Up	1.23523
ENSG00000234608	lncRNA	MAPKAPK5 antisense RNA 1 [Source:HGNC Symbol;Acc:HGNC:24091]	MAPKAPK5-AS1	0.295164	3.46419	8.11368	0.00439323	0.0118586	Unchanged	1.22702
ENSG00000215424	lncRNA	MCM3AP antisense RNA 1 [Source:HGNC Symbol;Acc:HGNC:16417]	MCM3AP-AS1	0.295271	4.9356	23.3617	1.34223e-06	8.0673e-06	Unchanged	1.22712
ENSG00000228109	lncRNA	MELTF antisense RNA 1 [Source:HGNC Symbol;Acc:HGNC:40373]	MELTF-AS1	-0.118292	2.32188	0.712238	0.398702	0.509557	Unchanged	0.921278
ENSG00000196312	transcribed_unprocessed_pseudogene	major facilitator superfamily domain containing 14C [Source:HGNC Symbol;Acc:HGNC:23672]	MFSD14C	0.0353499	7.06528	0.579922	0.446343	0.556872	Unchanged	1.02481
ENSG00000225783	lncRNA	myocardial infarction associated transcript [Source:HGNC Symbol;Acc:HGNC:33425]	MIAT	0.434156	7.46713	95.2696	1.66141e-22	6.25079e-21	Up	1.35112
ENSG00000244625	lncRNA	MIAT neighbor [Source:HGNC Symbol;Acc:HGNC:50731]	MIATNB	0.221328	2.98912	4.76818	0.0289905	0.0597868	Unchanged	1.16581
ENSG00000218537	lncRNA	MIF antisense RNA 1 [Source:HGNC Symbol;Acc:HGNC:27669]	MIF-AS1	0.157808	2.73397	1.1765	0.278069	0.383786	Unchanged	1.11559
ENSG00000255248	lncRNA	mir-100-let-7a-2-mir-125b-1 cluster host gene [Source:HGNC Symbol;Acc:HGNC:39522]	MIR100HG	0.503965	3.5099	32.8428	9.99189e-09	8.45154e-08	Up	1.41811
ENSG00000253230	lncRNA	MIR124-1 host gene [Source:HGNC Symbol;Acc:HGNC:27231]	MIR124-1HG	0.174216	4.3391	3.07951	0.0792843	0.139099	Unchanged	1.12835
ENSG00000225206	lncRNA	MIR137 host gene [Source:HGNC Symbol;Acc:HGNC:42871]	MIR137HG	0.555774	5.87555	105.426	9.85291e-25	4.4951e-23	Up	1.46996
ENSG00000215417	lncRNA	miR-17-92a-1 cluster host gene [Source:HGNC Symbol;Acc:HGNC:23564]	MIR17HG	0.151631	4.01489	2.29719	0.129608	0.208336	Unchanged	1.11082
ENSG00000204682	lncRNA	MIR1915 host gene [Source:HGNC Symbol;Acc:HGNC:31448]	MIR1915HG	0.200935	3.6334	5.94547	0.0147551	0.0336646	Unchanged	1.14944
ENSG00000267519	lncRNA	miR-23a/27a/24-2 cluster host gene [Source:HGNC Symbol;Acc:HGNC:27620]	MIR23AHG	-0.126196	2.77409	0.672895	0.412044	0.522976	Unchanged	0.916244
ENSG00000233006	lncRNA	MIR3936 host gene [Source:HGNC Symbol;Acc:HGNC:40538]	MIR3936HG	0.275396	3.03378	5.85523	0.0155308	0.0351506	Unchanged	1.21033
ENSG00000268471	lncRNA	MIR4453 host gene [Source:HGNC Symbol;Acc:HGNC:25288]	MIR4453HG	0.0588871	3.6478	0.432804	0.510616	0.617257	Unchanged	1.04166
ENSG00000247516	lncRNA	MIR4458 host gene [Source:HGNC Symbol;Acc:HGNC:49008]	MIR4458HG	0.201333	3.00898	3.79385	0.0514411	0.0968324	Unchanged	1.14976
ENSG00000236901	lncRNA	MIR600 host gene [Source:HGNC Symbol;Acc:HGNC:23642]	MIR600HG	0.0912824	4.97657	2.29305	0.129955	0.208807	Unchanged	1.06532
ENSG00000125462	lncRNA	MIR9-1 host gene [Source:HGNC Symbol;Acc:HGNC:30780]	MIR9-1HG	-0.267092	5.08445	14.6341	0.000130533	0.00052213	Unchanged	0.830993
ENSG00000255571	lncRNA	MIR9-3 host gene [Source:HGNC Symbol;Acc:HGNC:27388]	MIR9-3HG	0.0274126	4.98682	0.208387	0.648035	0.736002	Unchanged	1.01918
ENSG00000215386	lncRNA	mir-99a-let-7c cluster host gene [Source:HGNC Symbol;Acc:HGNC:1274]	MIR99AHG	0.787326	4.61687	132.954	9.2538e-31	6.45982e-29	Up	1.72587
ENSG00000269929	lncRNA	miRlet-7a-1/let-7f-1/let-7d cluster host gene [Source:HGNC Symbol;Acc:HGNC:53970]	MIRLET7A1HG	0.360532	3.13553	9.19095	0.00243215	0.00706713	Up	1.2839
ENSG00000197182	lncRNA	MIRLET7B host gene [Source:HGNC Symbol;Acc:HGNC:37189]	MIRLET7BHG	0.232037	3.55895	4.05686	0.0439923	0.0850486	Unchanged	1.17449
ENSG00000236753	lncRNA	MKLN1 antisense RNA [Source:HGNC Symbol;Acc:HGNC:40374]	MKLN1-AS	0.3221	2.78658	8.58309	0.00339298	0.00944687	Up	1.25015
ENSG00000218283	processed_pseudogene	mortality factor 4 like 1 pseudogene 1 [Source:HGNC Symbol;Acc:HGNC:20400]	MORF4L1P1	0.0836649	2.61759	0.471813	0.492154	0.600827	Unchanged	1.05971
ENSG00000224870	lncRNA	MRPL20 antisense RNA 1 [Source:HGNC Symbol;Acc:HGNC:27125]	MRPL20-AS1	-0.13228	4.28251	2.59548	0.107169	0.178738	Unchanged	0.912388
ENSG00000272455	lncRNA	MRPL20 divergent transcript [Source:HGNC Symbol;Acc:HGNC:54814]	MRPL20-DT	0.176784	2.50989	1.79301	0.18056	0.272545	Unchanged	1.13036
ENSG00000211459	Mt_rRNA	mitochondrially encoded 12S rRNA [Source:HGNC Symbol;Acc:HGNC:7470]	MT-RNR1	-0.167021	10.1285	3.27084	0.0705215	0.126151	Unchanged	0.89068
ENSG00000210082	Mt_rRNA	mitochondrially encoded 16S rRNA [Source:HGNC Symbol;Acc:HGNC:7471]	MT-RNR2	0.0895118	13.8099	4.30542	0.037991	0.0752161	Unchanged	1.06401
ENSG00000248527	unprocessed_pseudogene	MT-ATP6 pseudogene 1 [Source:HGNC Symbol;Acc:HGNC:44575]	MTATP6P1	0.192869	9.14995	12.0876	0.000507576	0.00176843	Unchanged	1.14303
ENSG00000237973	unprocessed_pseudogene	MT-CO1 pseudogene 12 [Source:HGNC Symbol;Acc:HGNC:52014]	MTCO1P12	0.194332	2.51288	1.78997	0.180929	0.27296	Unchanged	1.14419
ENSG00000225630	unprocessed_pseudogene	MT-ND2 pseudogene 28 [Source:HGNC Symbol;Acc:HGNC:42129]	MTND2P28	0.182876	6.85324	12.3606	0.000438489	0.00155579	Unchanged	1.13514
ENSG00000247627	processed_pseudogene	MT-ND4 pseudogene 12 [Source:HGNC Symbol;Acc:HGNC:42199]	MTND4P12	0.208996	7.87843	25.3665	4.7409e-07	3.08638e-06	Unchanged	1.15588
ENSG00000242086	lncRNA	MUC20 overlapping transcript [Source:HGNC Symbol;Acc:HGNC:53807]	MUC20-OT1	-0.206386	4.94063	6.79799	0.00912607	0.0223089	Unchanged	0.866705
ENSG00000281026	lncRNA	N4BPL2 intronic transcript 2 [Source:HGNC Symbol;Acc:HGNC:25038]	N4BP2L2-IT2	0.147455	2.23532	0.992885	0.319038	0.426352	Unchanged	1.10761
ENSG00000270231	transcribed_unprocessed_pseudogene	NBPF member 8 [Source:HGNC Symbol;Acc:HGNC:31990]	NBPF8	0.0238894	3.02626	0.0411886	0.839174	0.887096	Unchanged	1.0167
ENSG00000198496	lncRNA	neighbor of BRCA1 lncRNA 2 [Source:HGNC Symbol;Acc:HGNC:20691]	NBR2	-0.168849	2.89845	2.50702	0.11334	0.186666	Unchanged	0.889552
ENSG00000245532	lncRNA	nuclear paraspeckle assembly transcript 1 [Source:HGNC Symbol;Acc:HGNC:30815]	NEAT1	0.576235	7.26702	20.3026	6.611e-06	3.46644e-05	Up	1.49095
ENSG00000263412	lncRNA	NFE2L1 divergent transcript [Source:HGNC Symbol;Acc:HGNC:54812]	NFE2L1-DT	0.317004	2.40723	4.27773	0.038615	0.0761781	Unchanged	1.24574
ENSG00000272145	lncRNA	NFYC antisense RNA 1 [Source:HGNC Symbol;Acc:HGNC:49451]	NFYC-AS1	0.641733	2.36489	23.1816	1.47399e-06	8.80445e-06	Up	1.5602
ENSG00000236859	lncRNA	NIFK antisense RNA 1 [Source:HGNC Symbol;Acc:HGNC:27385]	NIFK-AS1	0.554372	3.26037	22.0942	2.59592e-06	1.48698e-05	Up	1.46853
ENSG00000285967	lncRNA	NIPBL divergent transcript [Source:HGNC Symbol;Acc:HGNC:51293]	NIPBL-DT	0.259616	5.70237	33.3232	7.8047e-09	6.69436e-08	Unchanged	1.19716
ENSG00000248092	lncRNA	NNT antisense RNA 1 [Source:HGNC Symbol;Acc:HGNC:49005]	NNT-AS1	-0.0519533	5.33195	0.887592	0.346131	0.454809	Unchanged	0.964629
ENSG00000249673	lncRNA	NOP14 antisense RNA 1 [Source:HGNC Symbol;Acc:HGNC:20205]	NOP14-AS1	0.178058	3.84296	3.82005	0.0506428	0.0956871	Unchanged	1.13136
ENSG00000260032	lncRNA	non-coding RNA activated by DNA damage [Source:HGNC Symbol;Acc:HGNC:44311]	NORAD	-0.0435911	8.6947	2.03474	0.15374	0.239616	Unchanged	0.970237
ENSG00000249353	processed_pseudogene	nucleophosmin 1 pseudogene 27 [Source:HGNC Symbol;Acc:HGNC:45206]	NPM1P27	0.0436291	3.04193	0.128543	0.719948	0.795741	Unchanged	1.0307
ENSG00000281183	lncRNA	NPTN intronic transcript 1 [Source:HGNC Symbol;Acc:HGNC:45091]	NPTN-IT1	0.324961	2.53101	5.84795	0.0155952	0.0352619	Up	1.25263
ENSG00000237187	lncRNA	NR2F1 antisense RNA 1 [Source:HGNC Symbol;Acc:HGNC:48622]	NR2F1-AS1	0.431835	3.64104	27.7026	1.41475e-07	1.00515e-06	Up	1.34895
ENSG00000248008	lncRNA	negative regulator of antiviral response [Source:HGNC Symbol;Acc:HGNC:48588]	NRAV	0.133263	4.08335	3.25759	0.0710935	0.126978	Unchanged	1.09677
ENSG00000225377	lncRNA	NRSN2 antisense RNA 1 [Source:HGNC Symbol;Acc:HGNC:51222]	NRSN2-AS1	0.450774	3.25802	16.6728	4.44137e-05	0.000198713	Up	1.36677
ENSG00000223705	transcribed_unprocessed_pseudogene	NSUN5 pseudogene 1 [Source:HGNC Symbol;Acc:HGNC:19146]	NSUN5P1	-0.22763	4.29106	5.40767	0.0200484	0.0436642	Unchanged	0.854037
ENSG00000106133	transcribed_unprocessed_pseudogene	NSUN5 pseudogene 2 [Source:HGNC Symbol;Acc:HGNC:16609]	NSUN5P2	-0.327642	3.41538	7.29099	0.00693014	0.0175956	Down	0.796838
ENSG00000226328	lncRNA	NUP50 divergent transcript [Source:HGNC Symbol;Acc:HGNC:50502]	NUP50-DT	-0.478338	2.96631	16.1728	5.78182e-05	0.000251406	Down	0.717804
ENSG00000223482	lncRNA	NUTM2A antisense RNA 1 [Source:HGNC Symbol;Acc:HGNC:45161]	NUTM2A-AS1	0.031891	4.78776	0.155741	0.693108	0.7731	Unchanged	1.02235
ENSG00000225484	lncRNA	NUTM2B antisense RNA 1 [Source:HGNC Symbol;Acc:HGNC:51204]	NUTM2B-AS1	-0.0422781	3.3106	0.175446	0.675316	0.75888	Unchanged	0.97112
ENSG00000247556	lncRNA	OIP5 antisense RNA 1 [Source:HGNC Symbol;Acc:HGNC:43563]	OIP5-AS1	-0.0607003	7.62835	3.85824	0.0495023	0.0940511	Unchanged	0.958799
ENSG00000235823	lncRNA	oligodendrocyte maturation-associated long intergenic non-coding RNA [Source:HGNC Symbol;Acc:HGNC:28060]	OLMALINC	0.387649	4.35682	19.7408	8.86858e-06	4.55941e-05	Up	1.30826
ENSG00000223891	lncRNA	OSER1 divergent transcript [Source:HGNC Symbol;Acc:HGNC:48585]	OSER1-DT	0.807257	3.35486	71.5398	2.7172e-17	6.65684e-16	Up	1.74988
ENSG00000253738	lncRNA	OTUD6B antisense RNA 1 (head to head) [Source:HGNC Symbol;Acc:HGNC:50466]	OTUD6B-AS1	-0.02352	4.98276	0.126911	0.721656	0.797117	Unchanged	0.983829
ENSG00000239883	transcribed_unprocessed_pseudogene	poly(ADP-ribose) glycohydrolase pseudogene 1 [Source:HGNC Symbol;Acc:HGNC:45008]	PARGP1	0.125591	3.67131	2.39063	0.122065	0.19858	Unchanged	1.09095
ENSG00000238197	lncRNA	PAXBP1 antisense RNA 1 [Source:HGNC Symbol;Acc:HGNC:39603]	PAXBP1-AS1	0.37728	3.81075	21.3719	3.78278e-06	2.09837e-05	Up	1.29889
ENSG00000273344	lncRNA	PAXIP1 divergent transcript [Source:HGNC Symbol;Acc:HGNC:27328]	PAXIP1-DT	0.263541	3.09822	6.43758	0.0111731	0.0264935	Unchanged	1.20042
ENSG00000179818	lncRNA	PCBP1 antisense RNA 1 [Source:HGNC Symbol;Acc:HGNC:42948]	PCBP1-AS1	0.217677	4.70286	8.2564	0.00406085	0.0110697	Unchanged	1.16286
ENSG00000253341	processed_pseudogene	poly(rC) binding protein 2 pseudogene 2 [Source:HGNC Symbol;Acc:HGNC:8650]	PCBP2P2	0.285465	3.56195	7.1026	0.00769723	0.0192897	Unchanged	1.2188
ENSG00000261377	transcribed_unprocessed_pseudogene	PDCD6IP pseudogene 2 [Source:HGNC Symbol;Acc:HGNC:49873]	PDCD6IPP2	-0.270057	3.78612	9.87594	0.00167454	0.0050824	Unchanged	0.829287
ENSG00000275131	transcribed_unprocessed_pseudogene	PDE4DIP pseudogene 2 [Source:HGNC Symbol;Acc:HGNC:55081]	PDE4DIPP2	0.0561542	2.48622	0.182528	0.669209	0.753478	Unchanged	1.03969
ENSG00000180867	transcribed_processed_pseudogene	protein disulfide isomerase family A member 3 pseudogene 1 [Source:HGNC Symbol;Acc:HGNC:4607]	PDIA3P1	-0.0332236	3.5117	0.140012	0.70827	0.785776	Unchanged	0.977234
ENSG00000274602	transcribed_unprocessed_pseudogene	phosphatidylinositol 4-kinase alpha pseudogene 1 [Source:HGNC Symbol;Acc:HGNC:33576]	PI4KAP1	0.135434	3.13506	1.25713	0.262195	0.366327	Unchanged	1.09842
ENSG00000183506	transcribed_unitary_pseudogene	phosphatidylinositol 4-kinase alpha pseudogene 2 [Source:HGNC Symbol;Acc:HGNC:33577]	PI4KAP2	0.193543	2.7678	2.64707	0.103741	0.173846	Unchanged	1.14357
ENSG00000117242	lncRNA	PINK1 antisense RNA [Source:HGNC Symbol;Acc:HGNC:38872]	PINK1-AS	-0.226806	4.28297	10.2394	0.00137469	0.00426961	Unchanged	0.854524
ENSG00000236618	lncRNA	PITPNA antisense RNA 1 [Source:HGNC Symbol;Acc:HGNC:44116]	PITPNA-AS1	0.194215	3.12486	4.04409	0.0443263	0.0856231	Unchanged	1.1441
ENSG00000250251	transcribed_unprocessed_pseudogene	polycystin 1, transient receptor potential channel interacting pseudogene 6 [Source:HGNC Symbol;Acc:HGNC:30070]	PKD1P6	0.223792	2.96628	3.90715	0.048081	0.0917745	Unchanged	1.1678
ENSG00000134297	transcribed_processed_pseudogene	pleckstrin homology domain containing A8 pseudogene 1 [Source:HGNC Symbol;Acc:HGNC:30222]	PLEKHA8P1	-0.142117	2.81672	1.43009	0.23175	0.33134	Unchanged	0.906189
ENSG00000214176	transcribed_unprocessed_pseudogene	pleckstrin homology and RUN domain containing M1 pseudogene 1 [Source:HGNC Symbol;Acc:HGNC:35411]	PLEKHM1P1	0.190442	4.2824	5.54403	0.0185438	0.0408451	Unchanged	1.14111
ENSG00000187953	transcribed_unprocessed_pseudogene	PMS2 C-terminal like pseudogene [Source:HGNC Symbol;Acc:HGNC:30061]	PMS2CL	0.244798	3.74484	8.45988	0.00363065	0.0100363	Unchanged	1.18493
ENSG00000078319	transcribed_unprocessed_pseudogene	PMS1 homolog 2, mismatch repair system component pseudogene 1 [Source:HGNC Symbol;Acc:HGNC:9123]	PMS2P1	-0.0306721	5.24237	0.224693	0.635487	0.724306	Unchanged	0.978964
ENSG00000127957	transcribed_unprocessed_pseudogene	PMS1 homolog 2, mismatch repair system component pseudogene 3 [Source:HGNC Symbol;Acc:HGNC:9128]	PMS2P3	0.227153	3.03338	3.64715	0.0561652	0.104135	Unchanged	1.17052
ENSG00000243970	transcribed_unprocessed_pseudogene	peptidylprolyl isomerase E like pseudogene [Source:HGNC Symbol;Acc:HGNC:33195]	PPIEL	0.248106	3.86814	8.80172	0.00300947	0.00850163	Unchanged	1.18765
ENSG00000124224	transcribed_unprocessed_pseudogene	protein phosphatase 4 regulatory subunit 1 like (pseudogene) [Source:HGNC Symbol;Acc:HGNC:15755]	PPP4R1L	-0.0162525	3.23018	0.022504	0.880754	0.91708	Unchanged	0.988798
ENSG00000257815	lncRNA	progenitor renewal associated non-coding RNA [Source:HGNC Symbol;Acc:HGNC:51126]	PRANCR	0.500751	2.58843	14.3336	0.00015311	0.000602255	Up	1.41495
ENSG00000239911	lncRNA	PRKAG2 antisense RNA 1 [Source:HGNC Symbol;Acc:HGNC:40468]	PRKAG2-AS1	0.499246	2.75031	19.9575	7.91839e-06	4.09635e-05	Up	1.41347
ENSG00000230461	lncRNA	PROX1 antisense RNA 1 [Source:HGNC Symbol;Acc:HGNC:43656]	PROX1-AS1	0.461049	4.28584	40.1216	2.3864e-10	2.54872e-09	Up	1.37654
ENSG00000257621	lncRNA	PSMA3 antisense RNA 1 [Source:HGNC Symbol;Acc:HGNC:26445]	PSMA3-AS1	0.213423	6.43229	16.8977	3.94488e-05	0.000178637	Unchanged	1.15944
ENSG00000230487	lncRNA	PSMG3 antisense RNA 1 (head to head) [Source:HGNC Symbol;Acc:HGNC:22230]	PSMG3-AS1	-0.235645	4.95388	13.4688	0.00024256	0.000915864	Unchanged	0.849305
ENSG00000237984	transcribed_processed_pseudogene	phosphatase and tensin homolog pseudogene 1 [Source:HGNC Symbol;Acc:HGNC:9589]	PTENP1	0.239661	2.40134	3.38613	0.0657472	0.119099	Unchanged	1.18072
ENSG00000231503	processed_pseudogene	prothymosin alpha pseudogene 4 [Source:HGNC Symbol;Acc:HGNC:9627]	PTMAP4	-0.276527	2.53862	4.44797	0.0349428	0.0701397	Unchanged	0.825576
ENSG00000214182	transcribed_processed_pseudogene	prothymosin alpha pseudogene 5 [Source:HGNC Symbol;Acc:HGNC:9628]	PTMAP5	-0.432783	2.24188	9.06932	0.00259934	0.0074798	Down	0.740831
ENSG00000269352	lncRNA	PTOV1 antisense RNA 2 [Source:HGNC Symbol;Acc:HGNC:51284]	PTOV1-AS2	-0.130585	2.56921	0.918779	0.337796	0.446218	Unchanged	0.913461
ENSG00000241472	lncRNA	PTPRG antisense RNA 1 [Source:HGNC Symbol;Acc:HGNC:44638]	PTPRG-AS1	-0.253423	3.42599	6.92507	0.00849957	0.0209566	Unchanged	0.838904
ENSG00000249859	lncRNA	Pvt1 oncogene [Source:HGNC Symbol;Acc:HGNC:9709]	PVT1	0.154477	3.24363	1.26868	0.260015	0.363983	Unchanged	1.11302
ENSG00000255857	lncRNA	PXN antisense RNA 1 [Source:HGNC Symbol;Acc:HGNC:44123]	PXN-AS1	-0.0443988	3.05188	0.131397	0.716988	0.792915	Unchanged	0.969694
ENSG00000246067	lncRNA	RAB30 divergent transcript [Source:HGNC Symbol;Acc:HGNC:48672]	RAB30-DT	0.372886	4.16692	17.6819	2.61095e-05	0.000122048	Up	1.29494
ENSG00000273247	lncRNA	RAB33B antisense RNA 1 [Source:HGNC Symbol;Acc:HGNC:55153]	RAB33B-AS1	0.324688	3.5356	9.65206	0.0018914	0.00567076	Up	1.25239
ENSG00000245849	lncRNA	RAD51 antisense RNA 1 [Source:HGNC Symbol;Acc:HGNC:48621]	RAD51-AS1	0.520566	4.05882	36.7736	1.32678e-09	1.25816e-08	Up	1.43452
ENSG00000197291	lncRNA	RAMP2 antisense RNA 1 [Source:HGNC Symbol;Acc:HGNC:44358]	RAMP2-AS1	-0.120671	3.23454	1.41942	0.233499	0.333471	Unchanged	0.919759
ENSG00000232160	lncRNA	RAP2C antisense RNA 1 [Source:HGNC Symbol;Acc:HGNC:40957]	RAP2C-AS1	0.427096	2.59201	10.4128	0.00125146	0.00393112	Up	1.34452
ENSG00000246695	lncRNA	RASSF8 antisense RNA 1 [Source:HGNC Symbol;Acc:HGNC:48637]	RASSF8-AS1	0.0291183	4.8864	0.235077	0.627785	0.717791	Unchanged	1.02039
ENSG00000227354	lncRNA	RBM26 antisense RNA 1 [Source:HGNC Symbol;Acc:HGNC:39805]	RBM26-AS1	0.231279	3.68035	7.24706	0.00710172	0.0179801	Unchanged	1.17388
ENSG00000203506	lncRNA	RBMS3 antisense RNA 2 [Source:HGNC Symbol;Acc:HGNC:39988]	RBMS3-AS2	0.311103	2.30616	5.7699	0.0163029	0.0365271	Up	1.24066
ENSG00000235904	lncRNA	RBMS3 antisense RNA 3 [Source:HGNC Symbol;Acc:HGNC:39989]	RBMS3-AS3	0.477603	2.65434	15.2634	9.35105e-05	0.000387276	Up	1.39243
ENSG00000214455	processed_pseudogene	reticulocalbin 1 pseudogene 2 [Source:HGNC Symbol;Acc:HGNC:39204]	RCN1P2	-0.356505	2.75427	9.22749	0.00238408	0.00695011	Down	0.781055
ENSG00000225465	lncRNA	RFPL1 antisense RNA 1 [Source:HGNC Symbol;Acc:HGNC:9978]	RFPL1S	0.0422473	5.12212	0.53963	0.462586	0.572698	Unchanged	1.02972
ENSG00000232892	lncRNA	RGS5 antisense RNA 1 [Source:HGNC Symbol;Acc:HGNC:40504]	RGS5-AS1	0.743075	2.53781	32.5808	1.14336e-08	9.60092e-08	Up	1.67374
ENSG00000276168	misc_RNA	RNA component of signal recognition particle 7SL1 [Source:HGNC Symbol;Acc:HGNC:10038]	RN7SL1	1.27319	2.68549	8.30902	0.00394487	0.0108018	Up	2.41696
ENSG00000234171	lncRNA	RNASEH1 antisense RNA 1 [Source:HGNC Symbol;Acc:HGNC:49289]	RNASEH1-AS1	-0.205524	4.92137	13.7063	0.000213736	0.000816608	Unchanged	0.867224
ENSG00000263069	lncRNA	RNF213 antisense RNA 1 [Source:HGNC Symbol;Acc:HGNC:54402]	RNF213-AS1	0.0614857	4.15391	0.594414	0.440717	0.551277	Unchanged	1.04354
ENSG00000196204	lncRNA	ring finger protein 216 pseudogene 1 [Source:HGNC Symbol;Acc:HGNC:33610]	RNF216P1	-0.189668	4.08012	5.14745	0.0232806	0.0495325	Unchanged	0.876808
ENSG00000224903	lncRNA	RNF32 antisense RNA 1 [Source:HGNC Symbol;Acc:HGNC:40798]	RNF32-AS1	-0.0939161	3.02654	0.747963	0.387122	0.497757	Unchanged	0.936976
ENSG00000205763	transcribed_unprocessed_pseudogene	RP9 pseudogene [Source:HGNC Symbol;Acc:HGNC:33969]	RP9P	-0.048301	3.49626	0.300525	0.583553	0.681812	Unchanged	0.967075
ENSG00000269609	lncRNA	C10orf95 antisense RNA 1 [Source:HGNC Symbol;Acc:HGNC:45238]	RPARP-AS1	-0.219319	3.8849	6.34696	0.0117582	0.0277504	Unchanged	0.858971
ENSG00000181524	processed_pseudogene	RPL24 pseudogene 4 [Source:HGNC Symbol;Acc:HGNC:21371]	RPL24P4	0.321885	2.62896	6.4085	0.0113576	0.0269089	Up	1.24996
ENSG00000251474	transcribed_unprocessed_pseudogene	ribosomal protein L32 pseudogene 3 [Source:HGNC Symbol;Acc:HGNC:27024]	RPL32P3	0.0147119	4.70356	0.066628	0.796311	0.855125	Unchanged	1.01025
ENSG00000242697	processed_pseudogene	ribosomal protein L5 pseudogene 12 [Source:HGNC Symbol;Acc:HGNC:36221]	RPL5P12	0.262914	2.33301	4.65602	0.0309448	0.0632654	Unchanged	1.1999
ENSG00000213553	processed_pseudogene	ribosomal protein lateral stalk subunit P0 pseudogene 6 [Source:HGNC Symbol;Acc:HGNC:36404]	RPLP0P6	0.301917	3.47294	7.56242	0.00595979	0.0154813	Up	1.23278
ENSG00000232818	processed_pseudogene	ribosomal protein S2 pseudogene 32 [Source:HGNC Symbol;Acc:HGNC:30518]	RPS2P32	0.205452	2.6645	2.99525	0.0835088	0.145104	Unchanged	1.15305
ENSG00000240342	processed_pseudogene	ribosomal protein S2 pseudogene 5 [Source:HGNC Symbol;Acc:HGNC:31386]	RPS2P5	0.0147153	6.30061	0.0699442	0.791418	0.851225	Unchanged	1.01025
ENSG00000234797	processed_pseudogene	RPS3A pseudogene 6 [Source:HGNC Symbol;Acc:HGNC:18630]	RPS3AP6	0.403361	2.40297	6.77873	0.00922506	0.0225195	Up	1.32259
ENSG00000263266	processed_pseudogene	ribosomal protein S7 pseudogene 1 [Source:HGNC Symbol;Acc:HGNC:17081]	RPS7P1	-0.243178	2.92887	5.80137	0.0160137	0.0360113	Unchanged	0.844882
ENSG00000248124	transcribed_unprocessed_pseudogene	RRN3 pseudogene 1 [Source:HGNC Symbol;Acc:HGNC:30548]	RRN3P1	0.206322	3.29388	3.43623	0.063781	0.11621	Unchanged	1.15374
ENSG00000257122	transcribed_unprocessed_pseudogene	RRN3 pseudogene 3 [Source:HGNC Symbol;Acc:HGNC:37620]	RRN3P3	-0.324563	2.61459	7.01669	0.00807535	0.020068	Down	0.79854
ENSG00000182841	transcribed_unprocessed_pseudogene	ribosomal RNA processing 7 homolog B, pseudogene [Source:HGNC Symbol;Acc:HGNC:30454]	RRP7BP	-0.235214	2.71148	2.4061	0.120863	0.197027	Unchanged	0.849559
ENSG00000224616	lncRNA	RTCA antisense RNA 1 [Source:HGNC Symbol;Acc:HGNC:50573]	RTCA-AS1	0.198366	3.42193	2.55499	0.109946	0.182063	Unchanged	1.1474
ENSG00000272870	lncRNA	SAP30 divergent transcript [Source:HGNC Symbol;Acc:HGNC:54424]	SAP30-DT	0.430617	3.16018	16.3646	5.22526e-05	0.000229705	Up	1.34781
ENSG00000228956	lncRNA	SATB1 antisense RNA 1 [Source:HGNC Symbol;Acc:HGNC:50687]	SATB1-AS1	0.171339	5.03455	8.24818	0.00407929	0.0111173	Unchanged	1.1261
ENSG00000225648	transcribed_unprocessed_pseudogene	SBDS pseudogene 1 [Source:HGNC Symbol;Acc:HGNC:21646]	SBDSP1	-0.390814	4.00788	21.316	3.89476e-06	2.15121e-05	Down	0.762699
ENSG00000246273	lncRNA	SBF2 antisense RNA 1 [Source:HGNC Symbol;Acc:HGNC:27438]	SBF2-AS1	0.107665	3.54249	1.39357	0.237804	0.338659	Unchanged	1.07748
ENSG00000245556	lncRNA	SCAMP1 antisense RNA 1 [Source:HGNC Symbol;Acc:HGNC:50544]	SCAMP1-AS1	0.378674	3.38892	20.0564	7.51916e-06	3.91253e-05	Up	1.30015
ENSG00000176700	transcribed_unprocessed_pseudogene	SCAN domain containing 2 pseudogene [Source:HGNC Symbol;Acc:HGNC:10567]	SCAND2P	0.255847	3.44197	6.10129	0.0135083	0.0311946	Unchanged	1.19404
ENSG00000196951	lncRNA	SCOC antisense RNA 1 [Source:HGNC Symbol;Acc:HGNC:50601]	SCOC-AS1	-0.337164	2.82548	8.05517	0.0045374	0.0121853	Down	0.791596
ENSG00000228451	transcribed_processed_pseudogene	SDA1 domain containing 1 pseudogene 1 [Source:HGNC Symbol;Acc:HGNC:31403]	SDAD1P1	0.729018	2.20711	30.3798	3.55217e-08	2.75711e-07	Up	1.65751
ENSG00000234684	lncRNA	SDCBP2 antisense RNA 1 [Source:HGNC Symbol;Acc:HGNC:44314]	SDCBP2-AS1	0.59953	2.66858	18.7793	1.46755e-05	7.2335e-05	Up	1.51522
ENSG00000185485	transcribed_unprocessed_pseudogene	succinate dehydrogenase complex flavoprotein subunit A pseudogene 1 [Source:HGNC Symbol;Acc:HGNC:32455]	SDHAP1	-0.231089	2.94516	4.10451	0.0427691	0.0830581	Unchanged	0.851991
ENSG00000185986	transcribed_unprocessed_pseudogene	succinate dehydrogenase complex flavoprotein subunit A pseudogene 3 [Source:HGNC Symbol;Acc:HGNC:18781]	SDHAP3	-0.234359	4.42209	10.63	0.00111267	0.0035422	Unchanged	0.850063
ENSG00000255042	transcribed_unprocessed_pseudogene	septin 7 pseudogene 11 [Source:HGNC Symbol;Acc:HGNC:55090]	SEPTIN7P11	-0.39643	2.91167	11.4366	0.00072013	0.00240972	Down	0.759736
ENSG00000185495	transcribed_unprocessed_pseudogene	septin 7 pseudogene 13 [Source:HGNC Symbol;Acc:HGNC:55092]	SEPTIN7P13	0.405698	2.7371	12.0149	0.000527772	0.00182616	Up	1.32473
ENSG00000245958	transcribed_unprocessed_pseudogene	septin 7 pseudogene 14 [Source:HGNC Symbol;Acc:HGNC:44219]	SEPTIN7P14	-0.221591	4.49447	8.62176	0.00332171	0.00926401	Unchanged	0.857619
ENSG00000214765	transcribed_unprocessed_pseudogene	septin 7 pseudogene 2 [Source:HGNC Symbol;Acc:HGNC:32339]	SEPTIN7P2	-0.151236	4.65563	4.41299	0.0356664	0.0713574	Unchanged	0.900479
ENSG00000226200	lncRNA	SGMS1 antisense RNA 1 [Source:HGNC Symbol;Acc:HGNC:49683]	SGMS1-AS1	0.615894	3.76099	45.2349	1.74759e-11	2.21081e-10	Up	1.53251
ENSG00000224660	lncRNA	SH3BP5 antisense RNA 1 [Source:HGNC Symbol;Acc:HGNC:44501]	SH3BP5-AS1	0.0309976	4.75463	0.289787	0.590357	0.687474	Unchanged	1.02172
ENSG00000232044	lncRNA	sciatic injury induced lincRNA upregulator of SOX11 [Source:HGNC Symbol;Acc:HGNC:26403]	SILC1	0.535828	3.72831	39.7018	2.95859e-10	3.11674e-09	Up	1.44977
ENSG00000236502	lncRNA	SIX3 antisense RNA 1 [Source:HGNC Symbol;Acc:HGNC:40532]	SIX3-AS1	0.0672765	2.79462	0.357716	0.549777	0.652614	Unchanged	1.04774
ENSG00000226419	lncRNA	SLC16A1 antisense RNA 1 [Source:HGNC Symbol;Acc:HGNC:49445]	SLC16A1-AS1	-0.0812034	4.22826	1.12669	0.288484	0.394896	Unchanged	0.945269
ENSG00000234771	lncRNA	SLC25A25 antisense RNA 1 [Source:HGNC Symbol;Acc:HGNC:27844]	SLC25A25-AS1	-0.0469727	4.52305	0.425012	0.514447	0.621045	Unchanged	0.967965
ENSG00000215790	transcribed_unprocessed_pseudogene	solute carrier family 35 member E2A [Source:HGNC Symbol;Acc:HGNC:20863]	SLC35E2A	0.147124	3.07681	2.31149	0.128421	0.20683	Unchanged	1.10736
ENSG00000225138	lncRNA	SLC9A3 antisense RNA 1 [Source:HGNC Symbol;Acc:HGNC:40550]	SLC9A3-AS1	0.343316	2.51811	5.03433	0.0248497	0.05248	Unchanged	1.26867
ENSG00000180747	transcribed_unprocessed_pseudogene	SMG1 pseudogene 3 [Source:HGNC Symbol;Acc:HGNC:49860]	SMG1P3	0.298966	2.35114	4.01524	0.0450909	0.086854	Unchanged	1.23026
ENSG00000261556	transcribed_unprocessed_pseudogene	SMG1 pseudogene 7 [Source:HGNC Symbol;Acc:HGNC:49864]	SMG1P7	-0.160653	3.65815	2.62942	0.1049	0.17546	Unchanged	0.89462
ENSG00000152117	transcribed_processed_pseudogene	sphingomyelin phosphodiesterase 4B, pseudogene [Source:HGNC Symbol;Acc:HGNC:24761]	SMPD4BP	0.000537263	4.36377	5.96431e-05	0.993838	0.99659	Unchanged	1.00037
ENSG00000255717	lncRNA	small nucleolar RNA host gene 1 [Source:HGNC Symbol;Acc:HGNC:32688]	SNHG1	0.0659985	6.26448	1.97885	0.159511	0.247015	Unchanged	1.04681
ENSG00000247092	lncRNA	small nucleolar RNA host gene 10 [Source:HGNC Symbol;Acc:HGNC:27510]	SNHG10	0.0931149	3.45307	0.795134	0.372552	0.483009	Unchanged	1.06667
ENSG00000174365	lncRNA	small nucleolar RNA host gene 11 [Source:HGNC Symbol;Acc:HGNC:25046]	SNHG11	0.215949	3.32614	5.65595	0.0173962	0.0386331	Unchanged	1.16147
ENSG00000197989	lncRNA	small nucleolar RNA host gene 12 [Source:HGNC Symbol;Acc:HGNC:30062]	SNHG12	-0.552379	3.87663	30.5101	3.32139e-08	2.5918e-07	Down	0.681895
ENSG00000224078	lncRNA	small nucleolar RNA host gene 14 [Source:HGNC Symbol;Acc:HGNC:37462]	SNHG14	-0.0105045	7.5497	0.0689334	0.792896	0.852327	Unchanged	0.992745
ENSG00000232956	lncRNA	small nucleolar RNA host gene 15 [Source:HGNC Symbol;Acc:HGNC:27797]	SNHG15	-0.306547	4.82678	24.6769	6.77902e-07	4.28094e-06	Down	0.808575
ENSG00000163597	lncRNA	small nucleolar RNA host gene 16 [Source:HGNC Symbol;Acc:HGNC:44352]	SNHG16	0.0909679	7.39769	0.709497	0.399611	0.510343	Unchanged	1.06508
ENSG00000196756	lncRNA	small nucleolar RNA host gene 17 [Source:HGNC Symbol;Acc:HGNC:48600]	SNHG17	-0.0137083	4.91923	0.0429077	0.835899	0.884522	Unchanged	0.990543
ENSG00000234912	lncRNA	small nucleolar RNA host gene 20 [Source:HGNC Symbol;Acc:HGNC:33099]	SNHG20	0.230913	4.2012	10.5807	0.00114277	0.00362905	Unchanged	1.17358
ENSG00000175061	lncRNA	small nucleolar RNA host gene 29 [Source:HGNC Symbol;Acc:HGNC:28619]	SNHG29	0.138865	8.35872	14.268	0.000158537	0.000620955	Unchanged	1.10104
ENSG00000242125	lncRNA	small nucleolar RNA host gene 3 [Source:HGNC Symbol;Acc:HGNC:10118]	SNHG3	-0.365442	5.27859	41.1412	1.41621e-10	1.58714e-09	Down	0.776231
ENSG00000204387	lncRNA	small nucleolar RNA host gene 32 [Source:HGNC Symbol;Acc:HGNC:19078]	SNHG32	0.144393	3.85943	3.85267	0.0496669	0.0942889	Unchanged	1.10527
ENSG00000281398	lncRNA	small nucleolar RNA host gene 4 [Source:HGNC Symbol;Acc:HGNC:32964]	SNHG4	-0.213395	4.59278	10.7568	0.00103899	0.00333143	Unchanged	0.862505
ENSG00000203875	lncRNA	small nucleolar RNA host gene 5 [Source:HGNC Symbol;Acc:HGNC:21026]	SNHG5	0.112333	7.03739	6.26968	0.0122821	0.02877	Unchanged	1.08097
ENSG00000245910	lncRNA	small nucleolar RNA host gene 6 [Source:HGNC Symbol;Acc:HGNC:32965]	SNHG6	0.142445	5.95695	7.14673	0.00751009	0.0188861	Unchanged	1.10377
ENSG00000233016	lncRNA	small nucleolar RNA host gene 7 [Source:HGNC Symbol;Acc:HGNC:28254]	SNHG7	0.00652126	4.3511	0.00749214	0.931024	0.951603	Unchanged	1.00453
ENSG00000269893	lncRNA	small nucleolar RNA host gene 8 [Source:HGNC Symbol;Acc:HGNC:33098]	SNHG8	0.242706	4.81809	12.1064	0.000502501	0.0017538	Unchanged	1.18321
ENSG00000246985	lncRNA	SOCS2 antisense RNA 1 [Source:HGNC Symbol;Acc:HGNC:27054]	SOCS2-AS1	0.345699	2.98105	9.49347	0.00206205	0.00610657	Up	1.27077
ENSG00000229692	lncRNA	SOS1 intronic transcript 1 [Source:HGNC Symbol;Acc:HGNC:41385]	SOS1-IT1	0.0106858	3.07686	0.0069592	0.933516	0.953149	Unchanged	1.00743
ENSG00000234494	lncRNA	SP2 antisense RNA 1 [Source:HGNC Symbol;Acc:HGNC:51341]	SP2-AS1	-0.264484	3.13268	6.09914	0.0135248	0.0312202	Unchanged	0.832496
ENSG00000248508	lncRNA	SRP14 antisense RNA1 (head to head) [Source:HGNC Symbol;Acc:HGNC:48619]	SRP14-AS1	0.161487	3.82651	2.78323	0.0952557	0.162089	Unchanged	1.11844
ENSG00000239445	lncRNA	ST3GAL6 antisense RNA 1 [Source:HGNC Symbol;Acc:HGNC:40828]	ST3GAL6-AS1	0.293078	3.73465	13.023	0.000307694	0.00113372	Unchanged	1.22525
ENSG00000227199	lncRNA	ST7 antisense RNA 1 [Source:HGNC Symbol;Acc:HGNC:16000]	ST7-AS1	0.917322	2.15604	38.4516	5.61277e-10	5.68041e-09	Up	1.88861
ENSG00000277072	transcribed_unprocessed_pseudogene	stromal antigen 3-like 2 (pseudogene) [Source:HGNC Symbol;Acc:HGNC:33886]	STAG3L2	0.0615867	3.29019	0.385542	0.534652	0.639507	Unchanged	1.04361
ENSG00000106610	transcribed_unprocessed_pseudogene	stromal antigen 3-like 4 (pseudogene) [Source:HGNC Symbol;Acc:HGNC:33887]	STAG3L4	0.199186	4.2673	8.67529	0.00322554	0.00902622	Unchanged	1.14805
ENSG00000242294	transcribed_unprocessed_pseudogene	stromal antigen 3-like 5 pseudogene [Source:HGNC Symbol;Acc:HGNC:48896]	STAG3L5P	0.290058	3.10524	4.00678	0.0453177	0.0872097	Unchanged	1.22269
ENSG00000204685	lncRNA	STARD7 antisense RNA 1 [Source:HGNC Symbol;Acc:HGNC:40827]	STARD7-AS1	-0.0219531	3.21967	0.0434857	0.834813	0.883857	Unchanged	0.984898
ENSG00000247708	lncRNA	STX18 antisense RNA 1 (head to head) [Source:HGNC Symbol;Acc:HGNC:48877]	STX18-AS1	-0.0539508	3.92134	0.285512	0.593111	0.689919	Unchanged	0.963295
ENSG00000264538	transcribed_unprocessed_pseudogene	SUZ12 pseudogene 1 [Source:HGNC Symbol;Acc:HGNC:32421]	SUZ12P1	-0.00681593	5.11432	0.0118506	0.913313	0.939501	Unchanged	0.995287
ENSG00000224597	transcribed_unprocessed_pseudogene	SVIL antisense RNA 1 [Source:HGNC Symbol;Acc:HGNC:51219]	SVIL-AS1	-0.143093	4.19322	4.35876	0.0368191	0.0733345	Unchanged	0.905576
ENSG00000267280	lncRNA	TBX2 antisense RNA 1 [Source:HGNC Symbol;Acc:HGNC:50355]	TBX2-AS1	-0.101946	4.18021	1.84138	0.174789	0.265739	Unchanged	0.931776
ENSG00000223459	unprocessed_pseudogene	TRPM8 channel associated factor 1 pseudogene 1 [Source:HGNC Symbol;Acc:HGNC:33604]	TCAF1P1	0.0132515	2.52155	0.0114715	0.914705	0.940348	Unchanged	1.00923
ENSG00000177822	lncRNA	TENM3 antisense RNA 1 [Source:HGNC Symbol;Acc:HGNC:28076]	TENM3-AS1	0.0225641	3.1306	0.0476423	0.827218	0.878844	Unchanged	1.01576
ENSG00000251022	lncRNA	THAP9 antisense RNA 1 [Source:HGNC Symbol;Acc:HGNC:44172]	THAP9-AS1	-0.256317	5.70842	19.9126	8.10623e-06	4.18979e-05	Unchanged	0.837223
ENSG00000206573	lncRNA	THUMPD3 antisense RNA 1 [Source:HGNC Symbol;Acc:HGNC:44478]	THUMPD3-AS1	0.0214826	5.31175	0.124423	0.724286	0.799335	Unchanged	1.015
ENSG00000271270	lncRNA	TMCC1 divergent transcript [Source:HGNC Symbol;Acc:HGNC:49060]	TMCC1-AS1	-0.0970167	4.30209	1.39944	0.236818	0.337338	Unchanged	0.934964
ENSG00000247373	lncRNA	TMED2 divergent transcript [Source:HGNC Symbol;Acc:HGNC:53346]	TMED2-DT	0.558827	2.3226	18.4554	1.73923e-05	8.44331e-05	Up	1.47307
ENSG00000236144	lncRNA	TMEM147 antisense RNA 1 [Source:HGNC Symbol;Acc:HGNC:51273]	TMEM147-AS1	0.200517	4.31566	6.63059	0.0100242	0.0242001	Unchanged	1.14911
ENSG00000247828	lncRNA	TMEM161B antisense RNA 1 [Source:HGNC Symbol;Acc:HGNC:43839]	TMEM161B-AS1	0.141659	5.84321	3.94087	0.0471265	0.0901456	Unchanged	1.10317
ENSG00000182796	transcribed_unitary_pseudogene	transmembrane protein 198B (pseudogene) [Source:HGNC Symbol;Acc:HGNC:43629]	TMEM198B	0.583099	4.40985	48.406	3.46515e-12	4.87899e-11	Up	1.49806
ENSG00000175147	lncRNA	TMEM51 antisense RNA 1 [Source:HGNC Symbol;Acc:HGNC:26301]	TMEM51-AS1	0.234307	4.41654	8.16641	0.00426733	0.0115645	Unchanged	1.17634
ENSG00000254860	lncRNA	TMEM9B antisense RNA 1 [Source:HGNC Symbol;Acc:HGNC:19230]	TMEM9B-AS1	0.366144	2.92698	9.30732	0.0022824	0.00668566	Up	1.2889
ENSG00000257167	lncRNA	TMPO antisense RNA 1 [Source:HGNC Symbol;Acc:HGNC:44158]	TMPO-AS1	0.142128	3.76451	3.23212	0.0722071	0.128452	Unchanged	1.10353
ENSG00000182165	lncRNA	TP53 target 1 [Source:HGNC Symbol;Acc:HGNC:17026]	TP53TG1	-0.0893946	2.7068	0.60835	0.43541	0.54638	Unchanged	0.939917
ENSG00000227372	transcribed_unitary_pseudogene	TP73 antisense RNA 1 [Source:HGNC Symbol;Acc:HGNC:29052]	TP73-AS1	-0.0266628	6.51276	0.383117	0.53594	0.640436	Unchanged	0.981689
ENSG00000241015	transcribed_processed_pseudogene	tropomyosin 3 pseudogene 9 [Source:HGNC Symbol;Acc:HGNC:44142]	TPM3P9	-0.155876	3.77625	3.4325	0.0639252	0.116418	Unchanged	0.897587
ENSG00000170919	lncRNA	TPT1 antisense RNA 1 [Source:HGNC Symbol;Acc:HGNC:43686]	TPT1-AS1	-0.117505	4.70796	2.4147	0.120201	0.196099	Unchanged	0.921781
ENSG00000231889	lncRNA	TRAF3IP2 antisense RNA 1 [Source:HGNC Symbol;Acc:HGNC:40005]	TRAF3IP2-AS1	0.277815	3.87684	12.1398	0.000493573	0.00172691	Unchanged	1.21236
ENSG00000225791	lncRNA	TRAM2 antisense RNA 1 (head to head) [Source:HGNC Symbol;Acc:HGNC:48663]	TRAM2-AS1	0.0857521	3.74174	1.01305	0.314174	0.421224	Unchanged	1.06124
ENSG00000108448	transcribed_unprocessed_pseudogene	tripartite motif containing 16 like [Source:HGNC Symbol;Acc:HGNC:32670]	TRIM16L	0.318869	3.76384	13.6222	0.000223522	0.000848958	Up	1.24735
ENSG00000235890	lncRNA	TSPEAR antisense RNA 1 [Source:HGNC Symbol;Acc:HGNC:1271]	TSPEAR-AS1	1.51514	3.46735	186.586	1.76825e-42	2.41064e-40	Up	2.85827
ENSG00000182912	lncRNA	TSPEAR antisense RNA 2 [Source:HGNC Symbol;Acc:HGNC:16428]	TSPEAR-AS2	1.42894	3.7024	238.942	6.68957e-54	1.43553e-51	Up	2.69249
ENSG00000235217	transcribed_processed_pseudogene	testis specific protein Y-linked 26, pseudogene [Source:HGNC Symbol;Acc:HGNC:16256]	TSPY26P	-0.0615403	2.78046	0.246079	0.61985	0.711029	Unchanged	0.958241
ENSG00000235954	lncRNA	TTC28 antisense RNA 1 [Source:HGNC Symbol;Acc:HGNC:29336]	TTC28-AS1	0.179248	4.55857	7.00104	0.00814623	0.0202181	Unchanged	1.13229
ENSG00000215105	processed_pseudogene	tetratricopeptide repeat domain 3 pseudogene 1 [Source:HGNC Symbol;Acc:HGNC:23318]	TTC3P1	0.0319324	4.87879	0.254966	0.6136	0.706083	Unchanged	1.02238
ENSG00000237298	lncRNA	TTN antisense RNA 1 [Source:HGNC Symbol;Acc:HGNC:44124]	TTN-AS1	0.33708	5.42534	27.4161	1.64059e-07	1.1523e-06	Up	1.2632
ENSG00000161149	lncRNA	tubulin alpha 3f pseudogene [Source:HGNC Symbol;Acc:HGNC:24067]	TUBA3FP	-0.770522	2.82121	45.4073	1.60037e-11	2.03568e-10	Down	0.586205
ENSG00000214796	transcribed_unprocessed_pseudogene	tubulin alpha 5, pseudogene [Source:HGNC Symbol;Acc:HGNC:54799]	TUBA5P	-0.172763	4.14091	5.2221	0.0223016	0.0478576	Unchanged	0.887142
ENSG00000272462	lncRNA	novel transcript	U91328.1	0.45184	2.27282	10.8296	0.000998916	0.00321898	Up	1.36778
ENSG00000248049	lncRNA	UBA6 antisense RNA 1 (head to head) [Source:HGNC Symbol;Acc:HGNC:49083]	UBA6-AS1	0.209477	4.23791	9.46864	0.00209014	0.00618029	Unchanged	1.15627
ENSG00000259429	transcribed_unprocessed_pseudogene	ubiquitin conjugating enzyme E2 Q2 pseudogene 2 [Source:HGNC Symbol;Acc:HGNC:37440]	UBE2Q2P2	0.205153	3.32833	3.3933	0.0654619	0.118657	Unchanged	1.15281
ENSG00000233966	processed_pseudogene	ubiquitin conjugating enzyme E2 S pseudogene 1 [Source:HGNC Symbol;Acc:HGNC:30864]	UBE2SP1	0.123632	2.40437	0.83143	0.361859	0.470884	Unchanged	1.08947
ENSG00000247240	lncRNA	UBL7 antisense RNA 1 (head to head) [Source:HGNC Symbol;Acc:HGNC:48614]	UBL7-AS1	0.192031	3.18272	3.69333	0.0546304	0.101717	Unchanged	1.14237
ENSG00000236404	lncRNA	VLDLR antisense RNA 1 [Source:HGNC Symbol;Acc:HGNC:49621]	VLDLR-AS1	-0.0804681	2.86532	0.37194	0.541949	0.645769	Unchanged	0.945751
ENSG00000261373	lncRNA	VPS9D1 antisense RNA 1 [Source:HGNC Symbol;Acc:HGNC:48915]	VPS9D1-AS1	-0.544645	4.22057	42.359	7.59647e-11	8.78521e-10	Down	0.68556
ENSG00000254635	lncRNA	WAC antisense RNA 1 (head to head) [Source:HGNC Symbol;Acc:HGNC:27347]	WAC-AS1	0.0306562	5.37135	0.329887	0.565726	0.666764	Unchanged	1.02148
ENSG00000231365	lncRNA	WARS2 antisense RNA 1 [Source:HGNC Symbol;Acc:HGNC:40612]	WARS2-AS1	0.0963775	3.78964	1.19281	0.274763	0.380128	Unchanged	1.06909
ENSG00000226210	unprocessed_pseudogene	WAS protein family homolog 8, pseudogene [Source:HGNC Symbol;Acc:HGNC:53913]	WASH8P	0.0143761	3.0123	0.0201336	0.887165	0.921326	Unchanged	1.01001
ENSG00000272686	lncRNA	WASL divergent transcript [Source:HGNC Symbol;Acc:HGNC:54820]	WASL-DT	0.566863	3.66955	44.761	2.22613e-11	2.77979e-10	Up	1.4813
ENSG00000272758	lncRNA	WDR5B divergent transcript [Source:HGNC Symbol;Acc:HGNC:55192]	WDR5B-DT	0.881775	2.57116	47.9981	4.26632e-12	5.9564e-11	Up	1.84264
ENSG00000228775	lncRNA	WEE2 antisense RNA 1 [Source:HGNC Symbol;Acc:HGNC:48669]	WEE2-AS1	0.277166	2.99558	5.80187	0.0160091	0.0360113	Unchanged	1.21181
ENSG00000229807	lncRNA	X inactive specific transcript [Source:HGNC Symbol;Acc:HGNC:12810]	XIST	0.138444	11.1118	8.91329	0.00283102	0.00804855	Unchanged	1.10072
ENSG00000239407	lncRNA	novel transcript	Z68871.1	-0.0865714	2.71899	0.364421	0.546061	0.649365	Unchanged	0.941758
ENSG00000286977	lncRNA	novel transcript	Z83745.1	0.0720658	2.3489	0.2415	0.623125	0.714009	Unchanged	1.05122
ENSG00000271533	lncRNA	novel transcript, sense intronic FTX	Z83843.1	0.301589	4.80738	7.63868	0.00571297	0.0149372	Up	1.2325
ENSG00000261188	lncRNA	TFIP11 divergent transcript [Source:HGNC Symbol;Acc:HGNC:55374]	Z95115.1	0.538546	3.42694	28.2331	1.07549e-07	7.77952e-07	Up	1.45251
ENSG00000255389	lncRNA	chromosome 6 open reading frame 3	Z97989.1	-0.318736	3.99025	17.5923	2.73698e-05	0.000127579	Down	0.801772
ENSG00000279453	TEC	TEC	Z99129.4	0.300136	2.47759	4.3149	0.03778	0.074875	Unchanged	1.23126
ENSG00000213062	lncRNA	novel transcript	Z99572.1	-0.205696	2.67954	2.7761	0.0956811	0.16255	Unchanged	0.86712
ENSG00000250802	lncRNA	ZBED3 antisense RNA 1 [Source:HGNC Symbol;Acc:HGNC:44188]	ZBED3-AS1	-0.00973425	3.80077	0.0105041	0.918368	0.942942	Unchanged	0.993275
ENSG00000133519	transcribed_unprocessed_pseudogene	ZDHHC8 pseudogene 1 [Source:HGNC Symbol;Acc:HGNC:26461]	ZDHHC8P1	-0.149746	4.05629	2.66278	0.102721	0.172637	Unchanged	0.901409
ENSG00000237036	lncRNA	ZEB1 antisense RNA 1 [Source:HGNC Symbol;Acc:HGNC:42354]	ZEB1-AS1	0.420514	3.07675	16.8634	4.01693e-05	0.000181687	Up	1.3384
ENSG00000229043	lncRNA	ZFAND2A divergent transcript [Source:HGNC Symbol;Acc:HGNC:41187]	ZFAND2A-DT	0.0309901	2.88324	0.0722689	0.788061	0.849099	Unchanged	1.02171
ENSG00000177410	lncRNA	ZNFX1 antisense RNA 1 [Source:HGNC Symbol;Acc:HGNC:33101]	ZFAS1	0.242172	4.78129	17.9462	2.27243e-05	0.000107701	Unchanged	1.18277
ENSG00000274925	lncRNA	ZKSCAN2 divergent transcript [Source:HGNC Symbol;Acc:HGNC:53912]	ZKSCAN2-DT	-0.0317319	2.5752	0.0617899	0.803689	0.861053	Unchanged	0.978245
ENSG00000123870	transcribed_unprocessed_pseudogene	zinc finger protein 137, pseudogene [Source:HGNC Symbol;Acc:HGNC:12921]	ZNF137P	-0.0178827	2.59421	0.0226306	0.880422	0.916898	Unchanged	0.987681
ENSG00000263072	lncRNA	ZNF213 antisense RNA 1 (head to head) [Source:HGNC Symbol;Acc:HGNC:50505]	ZNF213-AS1	0.200698	4.31999	6.22081	0.0126257	0.0294558	Unchanged	1.14925
ENSG00000196922	transcribed_unprocessed_pseudogene	zinc finger protein 252, pseudogene [Source:HGNC Symbol;Acc:HGNC:13046]	ZNF252P	-0.0639893	6.32429	2.09776	0.147515	0.231658	Unchanged	0.956615
ENSG00000257267	transcribed_unitary_pseudogene	zinc finger protein 271, pseudogene [Source:HGNC Symbol;Acc:HGNC:13065]	ZNF271P	-0.0607095	5.57341	1.0806	0.298563	0.405408	Unchanged	0.958792
ENSG00000249459	transcribed_unprocessed_pseudogene	zinc finger protein 286B (pseudogene) [Source:HGNC Symbol;Acc:HGNC:33241]	ZNF286B	0.0314576	3.17538	0.0883026	0.766346	0.832435	Unchanged	1.02204
ENSG00000234420	transcribed_processed_pseudogene	zinc finger protein 37B, pseudogene [Source:HGNC Symbol;Acc:HGNC:13103]	ZNF37BP	0.200955	6.93513	7.92358	0.00487945	0.0130104	Unchanged	1.14946
ENSG00000269834	lncRNA	ZNF528 antisense RNA 1 [Source:HGNC Symbol;Acc:HGNC:51305]	ZNF528-AS1	0.202042	3.48304	4.54933	0.0329316	0.0666221	Unchanged	1.15033
ENSG00000233527	lncRNA	ZNF529 antisense RNA 1 [Source:HGNC Symbol;Acc:HGNC:51275]	ZNF529-AS1	0.17297	3.08311	2.27689	0.131315	0.210584	Unchanged	1.12738
ENSG00000240225	transcribed_unprocessed_pseudogene	zinc finger protein 542, pseudogene [Source:HGNC Symbol;Acc:HGNC:25393]	ZNF542P	-0.0632046	5.2496	1.60752	0.204841	0.300734	Unchanged	0.957136
ENSG00000267106	lncRNA	ZNF561 antisense RNA 1 (head to head) [Source:HGNC Symbol;Acc:HGNC:27613]	ZNF561-AS1	0.0930008	3.48504	1.16678	0.280064	0.385942	Unchanged	1.06659
ENSG00000267470	lncRNA	ZNF571 antisense RNA 1 [Source:HGNC Symbol;Acc:HGNC:44324]	ZNF571-AS1	0.241425	3.55677	5.37175	0.0204654	0.0444274	Unchanged	1.18216
ENSG00000166770	lncRNA	ZNF667 antisense RNA 1 (head to head) [Source:HGNC Symbol;Acc:HGNC:44321]	ZNF667-AS1	0.0907419	4.21877	1.52273	0.217207	0.315097	Unchanged	1.06492
ENSG00000230844	lncRNA	ZNF674 antisense RNA 1 (head to head) [Source:HGNC Symbol;Acc:HGNC:44266]	ZNF674-AS1	0.255504	2.40138	4.06491	0.0437829	0.0847714	Unchanged	1.19375
ENSG00000242779	transcribed_processed_pseudogene	zinc finger protein 702, pseudogene [Source:HGNC Symbol;Acc:HGNC:25775]	ZNF702P	-0.0573343	2.60091	0.221407	0.63797	0.726779	Unchanged	0.961038
ENSG00000259291	lncRNA	ZNF710 antisense RNA 1 [Source:HGNC Symbol;Acc:HGNC:53141]	ZNF710-AS1	0.118902	4.45204	2.24382	0.134149	0.214417	Unchanged	1.08591
ENSG00000227671	transcribed_unprocessed_pseudogene	zinc finger protein 731, pseudogene [Source:HGNC Symbol;Acc:HGNC:32471]	ZNF731P	0.0127344	6.06809	0.0548145	0.814888	0.869754	Unchanged	1.00887
ENSG00000133624	transcribed_unprocessed_pseudogene	zinc finger family member 767, pseudogene [Source:HGNC Symbol;Acc:HGNC:21884]	ZNF767P	-0.11864	4.58247	3.05855	0.0803134	0.140619	Unchanged	0.921056
ENSG00000267254	lncRNA	ZNF790 antisense RNA 1 [Source:HGNC Symbol;Acc:HGNC:27617]	ZNF790-AS1	0.299047	3.62929	6.31853	0.0119483	0.028113	Unchanged	1.23033
ENSG00000235944	transcribed_unprocessed_pseudogene	zinc finger protein 815, pseudogene [Source:HGNC Symbol;Acc:HGNC:22029]	ZNF815P	0.520477	2.49709	15.2615	9.36057e-05	0.000387532	Up	1.43443
ENSG00000231205	transcribed_unprocessed_pseudogene	zinc finger protein 826, pseudogene [Source:HGNC Symbol;Acc:HGNC:33875]	ZNF826P	-0.0735866	5.02993	1.71384	0.190487	0.284108	Unchanged	0.950273
ENSG00000198155	transcribed_unprocessed_pseudogene	zinc finger protein 876, pseudogene [Source:HGNC Symbol;Acc:HGNC:32472]	ZNF876P	-0.106292	4.12099	2.05883	0.151326	0.236585	Unchanged	0.928973
ENSG00000267500	transcribed_unprocessed_pseudogene	zinc finger protein 887, pseudogene [Source:HGNC Symbol;Acc:HGNC:38700]	ZNF887P	0.386219	2.48104	10.0554	0.00151903	0.00466662	Up	1.30696
ENSG00000204623	transcribed_unitary_pseudogene	zinc ribbon domain containing 1 antisense, pseudogene [Source:HGNC Symbol;Acc:HGNC:13924]	ZNRD1ASP	0.180694	4.57823	6.23314	0.0125381	0.0292926	Unchanged	1.13343
ENSG00000225264	transcribed_processed_pseudogene	zinc and ring finger 2 pseudogene 2 [Source:HGNC Symbol;Acc:HGNC:42793]	ZNRF2P2	-0.0212021	2.86498	0.0330909	0.855654	0.898218	Unchanged	0.985411
ENSG00000219891	transcribed_unprocessed_pseudogene	zinc finger and SCAN domain containing 12 pseudogene 1 [Source:HGNC Symbol;Acc:HGNC:13850]	ZSCAN12P1	0.2918	3.36667	8.21929	0.00414473	0.0112744	Unchanged	1.22417
