# Supplementary material for: Oxidative Stress and Its Modulation by Ladostigil Alter the Expression of Abundant Long Non-Coding RNAs in SH-SY5Y Cells
Source: Noncoding RNA. 2022 Oct 25;8(6):72. doi: 10.3390/ncrna8060072 (PMC9680243; doi:10.3390/ncrna8060072)
Supplement: Supplementary file 1 [file ncrna-08-00072-s001.zip › SH-ncRNA-Suppl Table S4 (SNHG).xlsx]

## Sheet: SNGH DE
Table S4. SNHG representative of DE gene list from Sin1 vs NT cells (24 hrs)
ensemblID	Description	Gene_type	gene_name	logFC	logCPM	LR	PValue	FDR	Trend	DE ratio	amounts
ENSG00000174365	lncRNA	small nucleolar RNA host gene 11 [Source:HGNC Symbol;Acc:HGNC:25046]	SNHG11	0.215949	3.32614	5.65595	0.0173962	0.0386331	Unchanged	1.1615	10.0292
ENSG00000247092	lncRNA	small nucleolar RNA host gene 10 [Source:HGNC Symbol;Acc:HGNC:27510]	SNHG10	0.0931149	3.45307	0.795134	0.372552	0.483009	Unchanged	1.0667	10.9516
ENSG00000204387	lncRNA	small nucleolar RNA host gene 32 [Source:HGNC Symbol;Acc:HGNC:19078]	SNHG32	0.144393	3.85943	3.85267	0.0496669	0.0942889	Unchanged	1.1053	14.5145
ENSG00000197989	lncRNA	small nucleolar RNA host gene 12 [Source:HGNC Symbol;Acc:HGNC:30062]	SNHG12	-0.55238	3.87663	30.5101	3.3214e-08	2.5918e-07	Down	0.6819	14.6887
ENSG00000234912	lncRNA	small nucleolar RNA host gene 20 [Source:HGNC Symbol;Acc:HGNC:33099]	SNHG20	0.230913	4.2012	10.5807	0.00114277	0.00362905	Unchanged	1.1736	18.3945
ENSG00000233016	lncRNA	small nucleolar RNA host gene 7 [Source:HGNC Symbol;Acc:HGNC:28254]	SNHG7	0.00652126	4.3511	0.00749214	0.931024	0.951603	Unchanged	1.0045	20.4086
ENSG00000281398	lncRNA	small nucleolar RNA host gene 4 [Source:HGNC Symbol;Acc:HGNC:32964]	SNHG4	-0.213395	4.59278	10.7568	0.00103899	0.00333143	Unchanged	0.8625	24.1304
ENSG00000269893	lncRNA	small nucleolar RNA host gene 8 [Source:HGNC Symbol;Acc:HGNC:33098]	SNHG8	0.242706	4.81809	12.1064	0.0005025	0.0017538	Unchanged	1.1832	28.2091
ENSG00000232956	lncRNA	small nucleolar RNA host gene 15 [Source:HGNC Symbol;Acc:HGNC:27797]	SNHG15	-0.306547	4.82678	24.6769	6.779e-07	4.2809e-06	Down	0.8086	28.3795
ENSG00000196756	lncRNA	small nucleolar RNA host gene 17 [Source:HGNC Symbol;Acc:HGNC:48600]	SNHG17	-0.0137083	4.91923	0.0429077	0.835899	0.884522	Unchanged	0.9905	30.2577
ENSG00000242125	lncRNA	small nucleolar RNA host gene 3 [Source:HGNC Symbol;Acc:HGNC:10118]	SNHG3	-0.365442	5.27859	41.1412	1.4162e-10	1.5871e-09	Down	0.7762	38.8164
ENSG00000245910	lncRNA	small nucleolar RNA host gene 6 [Source:HGNC Symbol;Acc:HGNC:32965]	SNHG6	0.142445	5.95695	7.14673	0.00751009	0.0188861	Unchanged	1.1038	62.1184
ENSG00000255717	lncRNA	small nucleolar RNA host gene 1 [Source:HGNC Symbol;Acc:HGNC:32688]	SNHG1	0.0659985	6.26448	1.97885	0.159511	0.247015	Unchanged	1.0468	76.877
ENSG00000203875	lncRNA	small nucleolar RNA host gene 5 [Source:HGNC Symbol;Acc:HGNC:21026]	SNHG5	0.112333	7.03739	6.26968	0.0122821	0.02877	Unchanged	1.081	131.36
ENSG00000163597	lncRNA	small nucleolar RNA host gene 16 [Source:HGNC Symbol;Acc:HGNC:44352]	SNHG16	0.0909679	7.39769	0.709497	0.399611	0.510343	Unchanged	1.0651	168.627
ENSG00000224078	lncRNA	small nucleolar RNA host gene 14 [Source:HGNC Symbol;Acc:HGNC:37462]	SNHG14	-0.0105045	7.5497	0.0689334	0.792896	0.852327	Unchanged	0.9927	187.364
ENSG00000175061	lncRNA	small nucleolar RNA host gene 29 [Source:HGNC Symbol;Acc:HGNC:28619]	SNHG29	0.138865	8.35872	14.268	0.00015854	0.00062096	Unchanged	1.101	328.265

## Sheet: RAID
Supplementary Table S4. SNHG and their predicted RNA-interactome with supporting evidece ( based on RAID 2.0 database).
RAID_id	Interactor1	Category1	Id1	Species1	Interactor2	Category2	Id2	Species2	Methods	Databases_source	References	Score
RAID02061567	hsa-let-7a-5p	miRNA	MIMAT0000062	Homo sapiens	SNHG4	lncRNA	724102	Homo sapiens	CLIP-seq//Prediction	starBase//miRanda	None	0.6308
RAID04000146	hsa-let-7b-5p	miRNA	MIMAT0000063	Homo sapiens	SNHG4	lncRNA	724102	Homo sapiens	CLIP-seq//Prediction	starBase//miRanda	None	0.6308
RAID01872939	hsa-let-7c-5p	miRNA	MIMAT0000064	Homo sapiens	SNHG4	lncRNA	724102	Homo sapiens	CLIP-seq//Prediction	starBase//miRanda	None	0.6308
RAID03782185	hsa-let-7d-5p	miRNA	MIMAT0000065	Homo sapiens	SNHG4	lncRNA	724102	Homo sapiens	CLIP-seq//Prediction	starBase//miRanda	None	0.6308
RAID01675800	hsa-let-7e-5p	miRNA	MIMAT0000066	Homo sapiens	SNHG4	lncRNA	724102	Homo sapiens	CLIP-seq//Prediction	starBase//miRanda	None	0.6308
RAID03607966	hsa-let-7f-5p	miRNA	MIMAT0000067	Homo sapiens	SNHG4	lncRNA	724102	Homo sapiens	CLIP-seq//Prediction	starBase//miRanda	None	0.6308
RAID00633513	hsa-let-7g-5p	miRNA	MIMAT0000414	Homo sapiens	SNHG4	lncRNA	724102	Homo sapiens	CLIP-seq//Prediction	starBase//miRanda	None	0.6308
RAID03873787	hsa-let-7i-5p	miRNA	MIMAT0000415	Homo sapiens	SNHG4	lncRNA	724102	Homo sapiens	CLIP-seq//Prediction	starBase//miRanda	None	0.6308
RAID03908043	hsa-miR-1-3p	miRNA	MIMAT0000416	Homo sapiens	SNHG4	lncRNA	724102	Homo sapiens	CLIP-seq//Prediction	starBase//miRanda	None	0.6308
RAID01535334	hsa-miR-106a-5p	miRNA	MIMAT0000103	Homo sapiens	SNHG1	lncRNA	23642	Homo sapiens	CLIP	NPInter	25531890	0.5483
RAID03189619	hsa-miR-106a-5p	miRNA	MIMAT0000103	Homo sapiens	SNHG10	lncRNA	283596	Homo sapiens	CLIP	NPInter	25531890	0.5483
RAID02309165	hsa-miR-106a-5p	miRNA	MIMAT0000103	Homo sapiens	SNHG11	lncRNA	128439	Homo sapiens	CLIP	NPInter	25531890	0.5483
RAID03739800	hsa-miR-106a-5p	miRNA	MIMAT0000103	Homo sapiens	SNHG12	lncRNA	85028	Homo sapiens	CLIP	NPInter	25531890	0.5483
RAID01535106	hsa-miR-106a-5p	miRNA	MIMAT0000103	Homo sapiens	SNHG14	lncRNA	104472715	Homo sapiens	CLIP	NPInter	25531890	0.5483
RAID02100376	hsa-miR-106a-5p	miRNA	MIMAT0000103	Homo sapiens	SNHG20	lncRNA	654434	Homo sapiens	CLIP-seq//CLIP//Prediction	NPInter//starBase//miRanda	25531890	0.7226
RAID01355615	hsa-miR-106a-5p	miRNA	MIMAT0000103	Homo sapiens	SNHG3	lncRNA	8420	Homo sapiens	CLIP	NPInter	25531890	0.5483
RAID02333337	hsa-miR-106a-5p	miRNA	MIMAT0000103	Homo sapiens	SNHG5	lncRNA	387066	Homo sapiens	CLIP	NPInter	25531890	0.5483
RAID02099412	hsa-miR-106a-5p	miRNA	MIMAT0000103	Homo sapiens	SNHG6	lncRNA	641638	Homo sapiens	CLIP	NPInter	25531890	0.5483
RAID02932318	hsa-miR-106a-5p	miRNA	MIMAT0000103	Homo sapiens	SNHG7	lncRNA	84973	Homo sapiens	CLIP	NPInter	25531890	0.5483
RAID02770707	hsa-miR-106a-5p	miRNA	MIMAT0000103	Homo sapiens	SNHG9	lncRNA	735301	Homo sapiens	CLIP	NPInter	25531890	0.5483
RAID01548724	hsa-miR-106b-5p	miRNA	MIMAT0000680	Homo sapiens	SNHG20	lncRNA	654434	Homo sapiens	CLIP-seq//Prediction	starBase//miRanda	None	0.6308
RAID00645494	hsa-miR-1207-5p	miRNA	MIMAT0005871	Homo sapiens	SNHG3	lncRNA	8420	Homo sapiens	CLIP	NPInter	23846593	0.5483
RAID01706188	hsa-miR-1224-3p	miRNA	MIMAT0005459	Homo sapiens	SNHG3	lncRNA	8420	Homo sapiens	CLIP	NPInter	23846593	0.5483
RAID01608839	hsa-miR-1226-5p	miRNA	MIMAT0005576	Homo sapiens	SNHG3	lncRNA	8420	Homo sapiens	CLIP	NPInter	23846593	0.5483
RAID02538546	hsa-miR-1229-3p	miRNA	MIMAT0005584	Homo sapiens	SNHG3	lncRNA	8420	Homo sapiens	CLIP	NPInter	23846593	0.5483
RAID02431928	hsa-miR-125a-3p	miRNA	MIMAT0004602	Homo sapiens	SNHG4	lncRNA	724102	Homo sapiens	CLIP-seq//Prediction	starBase//miRanda	None	0.6308
RAID01976699	hsa-miR-1268a	miRNA	MIMAT0005922	Homo sapiens	SNHG3	lncRNA	8420	Homo sapiens	CLIP	NPInter	23846593	0.5483
RAID01332351	hsa-miR-1268b	miRNA	MIMAT0018925	Homo sapiens	SNHG3	lncRNA	8420	Homo sapiens	CLIP	NPInter	23846593	0.5483
RAID02025196	hsa-miR-1273a	miRNA	MIMAT0005926	Homo sapiens	SNHG3	lncRNA	8420	Homo sapiens	CLIP	NPInter	23846593	0.5483
RAID00188259	hsa-miR-1273g-3p	miRNA	MIMAT0022742	Homo sapiens	SNHG3	lncRNA	8420	Homo sapiens	CLIP	NPInter	23846593	0.5483
RAID01447372	hsa-miR-1295b-5p	miRNA	MIMAT0022293	Homo sapiens	SNHG3	lncRNA	8420	Homo sapiens	CLIP	NPInter	23846593	0.5483
RAID00012201	hsa-miR-1303	miRNA	MIMAT0005891	Homo sapiens	SNHG1	lncRNA	23642	Homo sapiens	CLIP	NPInter	23846593	0.5483
RAID00129901	hsa-miR-139-5p	miRNA	MIMAT0000250	Homo sapiens	SNHG3	lncRNA	8420	Homo sapiens	CLIP	NPInter	23846593	0.5483
RAID01046344	hsa-miR-140-5p	miRNA	MIMAT0000431	Homo sapiens	SNHG20	lncRNA	654434	Homo sapiens	CLIP-seq//Prediction	starBase//miRanda	None	0.6308
RAID02229420	hsa-miR-154-5p	miRNA	MIMAT0000452	Homo sapiens	SNHG11	lncRNA	128439	Homo sapiens	CLIP-seq//Prediction	starBase//miRanda	None	0.6308
RAID01607246	hsa-miR-16-5p	miRNA	MIMAT0000069	Homo sapiens	SNHG1	lncRNA	23642	Homo sapiens	CLIP	NPInter	23846593	0.5483
RAID02654610	hsa-miR-17-5p	miRNA	MIMAT0000070	Homo sapiens	SNHG20	lncRNA	654434	Homo sapiens	CLIP-seq//Prediction	starBase//miRanda	None	0.6308
RAID03693681	hsa-miR-185-3p	miRNA	MIMAT0004611	Homo sapiens	SNHG3	lncRNA	8420	Homo sapiens	CLIP	NPInter	23846593	0.5483
RAID00229735	hsa-miR-18b-5p	miRNA	MIMAT0001412	Homo sapiens	SNHG20	lncRNA	654434	Homo sapiens	CLIP-seq//Prediction	starBase//miRanda	None	0.6308
RAID02979824	hsa-miR-1912	miRNA	MIMAT0007887	Homo sapiens	SNHG1	lncRNA	23642	Homo sapiens	CLIP	NPInter	23846593	0.5483
RAID03596253	hsa-miR-196a-5p	miRNA	MIMAT0000226	Homo sapiens	SNHG4	lncRNA	724102	Homo sapiens	CLIP-seq//Prediction	starBase//miRanda	None	0.6308
RAID02331835	hsa-miR-196b-5p	miRNA	MIMAT0001080	Homo sapiens	SNHG4	lncRNA	724102	Homo sapiens	CLIP-seq//Prediction	starBase//miRanda	None	0.6308
RAID01694676	hsa-miR-19a-3p	miRNA	MIMAT0000073	Homo sapiens	SNHG20	lncRNA	654434	Homo sapiens	CLIP-seq//Prediction	starBase//miRanda	None	0.6308
RAID00708025	hsa-miR-19b-3p	miRNA	MIMAT0000074	Homo sapiens	SNHG20	lncRNA	654434	Homo sapiens	CLIP-seq//Prediction	starBase//miRanda	None	0.6308
RAID03687573	hsa-miR-202-3p	miRNA	MIMAT0002811	Homo sapiens	SNHG3	lncRNA	8420	Homo sapiens	CLIP	NPInter	23846593	0.5483
RAID00798621	hsa-miR-206	miRNA	MIMAT0000462	Homo sapiens	SNHG4	lncRNA	724102	Homo sapiens	CLIP-seq//Prediction	starBase//miRanda	None	0.6308
RAID04045714	hsa-miR-20a-5p	miRNA	MIMAT0000075	Homo sapiens	SNHG20	lncRNA	654434	Homo sapiens	CLIP-seq//Prediction	starBase//miRanda	None	0.6308
RAID02913003	hsa-miR-20b-5p	miRNA	MIMAT0001413	Homo sapiens	SNHG20	lncRNA	654434	Homo sapiens	CLIP-seq//Prediction	starBase//miRanda	None	0.6308
RAID03240390	hsa-miR-21-5p	miRNA	MIMAT0000076	Homo sapiens	SNHG9	lncRNA	735301	Homo sapiens	CLIP-seq//Prediction	starBase//miRanda	None	0.6308
RAID00842346	hsa-miR-218-5p	miRNA	MIMAT0000275	Homo sapiens	SNHG15	lncRNA	285958	Homo sapiens	CLIP-seq	miRTarBase	23212916	0.5483
RAID03738797	hsa-miR-224-5p	miRNA	MIMAT0000281	Homo sapiens	SNHG7	lncRNA	84973	Homo sapiens	CLIP-seq	starBase	None	0.5483
RAID03201271	hsa-miR-29a-3p	miRNA	MIMAT0000086	Homo sapiens	SNHG20	lncRNA	654434	Homo sapiens	CLIP-seq//Prediction	starBase//miRanda	None	0.6308
RAID00976669	hsa-miR-29b-3p	miRNA	MIMAT0000100	Homo sapiens	SNHG20	lncRNA	654434	Homo sapiens	CLIP-seq//Prediction	starBase//miRanda	None	0.6308
RAID02057811	hsa-miR-29c-3p	miRNA	MIMAT0000681	Homo sapiens	SNHG20	lncRNA	654434	Homo sapiens	CLIP-seq//Prediction	starBase//miRanda	None	0.6308
RAID00831268	hsa-miR-30a-3p	miRNA	MIMAT0000088	Homo sapiens	SNHG1	lncRNA	23642	Homo sapiens	CLIP	NPInter	23846593	0.5483
RAID00591926	hsa-miR-30b-3p	miRNA	MIMAT0004589	Homo sapiens	SNHG3	lncRNA	8420	Homo sapiens	CLIP	NPInter	23846593	0.5483
RAID02999809	hsa-miR-30d-3p	miRNA	MIMAT0004551	Homo sapiens	SNHG1	lncRNA	23642	Homo sapiens	CLIP	NPInter	23846593	0.5483
RAID01606799	hsa-miR-30e-3p	miRNA	MIMAT0000693	Homo sapiens	SNHG1	lncRNA	23642	Homo sapiens	CLIP	NPInter	23846593	0.5483
RAID00544908	hsa-miR-3127-5p	miRNA	MIMAT0014990	Homo sapiens	SNHG1	lncRNA	23642	Homo sapiens	CLIP	NPInter	23846593	0.5483
RAID02369970	hsa-miR-3127-5p	miRNA	MIMAT0014990	Homo sapiens	SNHG3	lncRNA	8420	Homo sapiens	CLIP	NPInter	23846593	0.5483
RAID02666397	hsa-miR-3135b	miRNA	MIMAT0018985	Homo sapiens	SNHG3	lncRNA	8420	Homo sapiens	CLIP	NPInter	23846593	0.5483
RAID04022317	hsa-miR-3155a	miRNA	MIMAT0015029	Homo sapiens	SNHG1	lncRNA	23642	Homo sapiens	CLIP	NPInter	23846593	0.5483
RAID00558861	hsa-miR-3192-5p	miRNA	MIMAT0015076	Homo sapiens	SNHG3	lncRNA	8420	Homo sapiens	CLIP	NPInter	23846593	0.5483
RAID02892900	hsa-miR-342-3p	miRNA	MIMAT0000753	Homo sapiens	SNHG7	lncRNA	84973	Homo sapiens	CLIP-seq	starBase	None	0.5483
RAID03553750	hsa-miR-3607-3p	miRNA	MIMAT0017985	Homo sapiens	SNHG1	lncRNA	23642	Homo sapiens	CLIP	NPInter	23846593	0.5483
RAID01661870	hsa-miR-3681-3p	miRNA	MIMAT0018109	Homo sapiens	SNHG1	lncRNA	23642	Homo sapiens	CLIP	NPInter	23846593	0.5483
RAID03157216	hsa-miR-373-3p	miRNA	MIMAT0000726	Homo sapiens	SNHG3	lncRNA	8420	Homo sapiens	CLIP	NPInter	23846593	0.5483
RAID02813899	hsa-miR-377-3p	miRNA	MIMAT0000730	Homo sapiens	SNHG4	lncRNA	724102	Homo sapiens	CLIP-seq//Prediction	starBase//miRanda	None	0.6308
RAID01306661	hsa-miR-3929	miRNA	MIMAT0018206	Homo sapiens	SNHG3	lncRNA	8420	Homo sapiens	CLIP	NPInter	23846593	0.5483
RAID00106145	hsa-miR-424-5p	miRNA	MIMAT0001341	Homo sapiens	SNHG1	lncRNA	23642	Homo sapiens	CLIP	NPInter	23846593	0.5483
RAID03205256	hsa-miR-4462	miRNA	MIMAT0018986	Homo sapiens	SNHG3	lncRNA	8420	Homo sapiens	CLIP	NPInter	23846593	0.5483
RAID01102016	hsa-miR-4463	miRNA	MIMAT0018987	Homo sapiens	SNHG1	lncRNA	23642	Homo sapiens	CLIP	NPInter	23846593	0.5483
RAID02948292	hsa-miR-4695-5p	miRNA	MIMAT0019788	Homo sapiens	SNHG3	lncRNA	8420	Homo sapiens	CLIP	NPInter	23846593	0.5483
RAID03441915	hsa-miR-4768-3p	miRNA	MIMAT0019921	Homo sapiens	SNHG1	lncRNA	23642	Homo sapiens	CLIP	NPInter	23846593	0.5483
RAID02724921	hsa-miR-4778-3p	miRNA	MIMAT0019937	Homo sapiens	SNHG3	lncRNA	8420	Homo sapiens	CLIP	NPInter	23846593	0.5483
RAID02949399	hsa-miR-4789-5p	miRNA	MIMAT0019959	Homo sapiens	SNHG1	lncRNA	23642	Homo sapiens	CLIP	NPInter	23846593	0.5483
RAID02244741	hsa-miR-485-5p	miRNA	MIMAT0002175	Homo sapiens	SNHG20	lncRNA	654434	Homo sapiens	CLIP-seq//Prediction	starBase//miRanda	None	0.6308
RAID00045669	hsa-miR-488-3p	miRNA	MIMAT0004763	Homo sapiens	SNHG4	lncRNA	724102	Homo sapiens	CLIP-seq//Prediction	starBase//miRanda	None	0.6308
RAID00363905	hsa-miR-490-3p	miRNA	MIMAT0002806	Homo sapiens	SNHG20	lncRNA	654434	Homo sapiens	CLIP-seq//Prediction	starBase//miRanda	None	0.6308
RAID03534336	hsa-miR-495-3p	miRNA	MIMAT0002817	Homo sapiens	SNHG20	lncRNA	654434	Homo sapiens	CLIP-seq//Prediction	starBase//miRanda	None	0.6308
RAID00812461	hsa-miR-499b-5p	miRNA	MIMAT0019897	Homo sapiens	SNHG3	lncRNA	8420	Homo sapiens	CLIP	NPInter	23846593	0.5483
RAID00199060	hsa-miR-5096	miRNA	MIMAT0020603	Homo sapiens	SNHG3	lncRNA	8420	Homo sapiens	CLIP	NPInter	23846593	0.5483
RAID01293593	hsa-miR-5189-5p	miRNA	MIMAT0021120	Homo sapiens	SNHG3	lncRNA	8420	Homo sapiens	CLIP	NPInter	23846593	0.5483
RAID01830763	hsa-miR-519d-3p	miRNA	MIMAT0002853	Homo sapiens	SNHG20	lncRNA	654434	Homo sapiens	CLIP-seq//Prediction	starBase//miRanda	None	0.6308
RAID00446160	hsa-miR-526b-5p	miRNA	MIMAT0002835	Homo sapiens	SNHG1	lncRNA	23642	Homo sapiens	CLIP	NPInter	23846593	0.5483
RAID01178706	hsa-miR-548c-3p	miRNA	MIMAT0003285	Homo sapiens	SNHG1	lncRNA	23642	Homo sapiens	CLIP	NPInter	23846593	0.5483
RAID02681521	hsa-miR-590-3p	miRNA	MIMAT0004801	Homo sapiens	SNHG1	lncRNA	23642	Homo sapiens	CLIP	NPInter	23846593	0.5483
RAID00463561	hsa-miR-613	miRNA	MIMAT0003281	Homo sapiens	SNHG4	lncRNA	724102	Homo sapiens	CLIP-seq//Prediction	starBase//miRanda	None	0.6308
RAID03274763	hsa-miR-649	miRNA	MIMAT0003319	Homo sapiens	SNHG3	lncRNA	8420	Homo sapiens	CLIP	NPInter	23846593	0.5483
RAID02176016	hsa-miR-6503-3p	miRNA	MIMAT0025463	Homo sapiens	SNHG1	lncRNA	23642	Homo sapiens	CLIP	NPInter	23846593	0.5483
RAID01692076	hsa-miR-6506-5p	miRNA	MIMAT0025468	Homo sapiens	SNHG3	lncRNA	8420	Homo sapiens	CLIP	NPInter	23846593	0.5483
RAID03080805	hsa-miR-654-3p	miRNA	MIMAT0004814	Homo sapiens	SNHG1	lncRNA	23642	Homo sapiens	CLIP	NPInter	23846593	0.5483
RAID03122090	hsa-miR-6715a-3p	miRNA	MIMAT0025841	Homo sapiens	SNHG3	lncRNA	8420	Homo sapiens	CLIP	NPInter	23846593	0.5483
RAID02830069	hsa-miR-6715b-3p	miRNA	MIMAT0025843	Homo sapiens	SNHG3	lncRNA	8420	Homo sapiens	CLIP	NPInter	23846593	0.5483
RAID01198317	hsa-miR-760	miRNA	MIMAT0004957	Homo sapiens	SNHG1	lncRNA	23642	Homo sapiens	CLIP	NPInter	23846593	0.5483
RAID00003281	hsa-miR-877-3p	miRNA	MIMAT0004950	Homo sapiens	SNHG1	lncRNA	23642	Homo sapiens	CLIP	NPInter	23846593	0.5483
RAID02353745	hsa-miR-892b	miRNA	MIMAT0004918	Homo sapiens	SNHG3	lncRNA	8420	Homo sapiens	CLIP	NPInter	23846593	0.5483
RAID03919102	hsa-miR-9-5p	miRNA	MIMAT0000441	Homo sapiens	SNHG16	lncRNA	100507246	Homo sapiens	Microarray	miRTarBase	17612493	0.5483
RAID01473968	hsa-miR-9-5p	miRNA	MIMAT0000441	Homo sapiens	SNHG7	lncRNA	84973	Homo sapiens	CLIP-seq	starBase	None	0.5483
RAID00126011	hsa-miR-93-5p	miRNA	MIMAT0000093	Homo sapiens	SNHG20	lncRNA	654434	Homo sapiens	CLIP-seq//Prediction	starBase//miRanda	None	0.6308
RAID00570560	hsa-miR-98-5p	miRNA	MIMAT0000096	Homo sapiens	SNHG4	lncRNA	724102	Homo sapiens	CLIP-seq//Prediction	starBase//miRanda	None	0.6308
