# Supplementary material for: Oxidative Stress and Its Modulation by Ladostigil Alter the Expression of Abundant Long Non-Coding RNAs in SH-SY5Y Cells
Source: Noncoding RNA. 2022 Oct 25;8(6):72. doi: 10.3390/ncrna8060072 (PMC9680243; doi:10.3390/ncrna8060072)
Supplement: Supplementary file 1 [file ncrna-08-00072-s001.zip › SH-ncRNA-Suppl Table S5 (GAS5).xlsx]

## Sheet: GAS5
Supplementary Table S5. GAS5 and MTND4P12 MBS and conservation of sites
microRNA family	Seed position	Seed type	Conservation pimates	Conservation mammals	ncRNA gene
miR-10abc/10a-5p	chr1:173833210	7-mer-m8	0.56	0	GAS5
miR-128/128ab	chr1:173834391	7-mer-m8	0.33	0	GAS5
miR-132/212/212-3p	chr1:173834563	7-mer-A1	0.67	0.13	GAS5
miR-135ab/135a-5p	chr1:173835675	7-mer-m8	0.56	0	GAS5
miR-135ab/135a-5p	chr1:173835859	7-mer-m8	0.33	0	GAS5
miR-137/137ab	chr1:173833995	7-mer-m8	0.44	0.09	GAS5
miR-138/138ab	chr1:173836426	7-mer-m8	0.56	0	GAS5
miR-139-5p	chr1:173833740	7-mer-A1	0.67	0	GAS5
miR-144	chr1:173837127	7-mer-m8	0.11	0	GAS5
miR-148ab-3p/152	chr1:173834121	7-mer-A1	0.22	0	GAS5
miR-153	chr1:173833876	7-mer-A1	0.44	0	GAS5
miR-155	chr1:173835221	7-mer-A1	0.56	0.22	GAS5
miR-182	chr1:173833557	7-mer-A1	0.89	0.87	GAS5
miR-18ab/4735-3p	chr1:173833749	7-mer-A1	0.67	0	GAS5
miR-18ab/4735-3p	chr1:173836136	8-mer	0.56	0	GAS5
miR-196abc	chr1:173834448	8-mer	0.22	0.26	GAS5
miR-200bc/429/548a	chr1:173834985	7-mer-A1	0.67	0.04	GAS5
miR-205/205ab	chr1:173835127	7-mer-m8	0.78	0.48	GAS5
miR-208ab/208ab-3p	chr1:173835122	7-mer-A1	1	0.43	GAS5
miR-21/590-5p	chr1:173836785	7-mer-A1	0.56	0	GAS5
miR-216a	chr1:173834432	7-mer-A1	0.56	0	GAS5
miR-216a	chr1:173834505	7-mer-A1	0.67	0	GAS5
miR-216b/216b-5p	chr1:173834432	7-mer-A1	0.56	0	GAS5
miR-216b/216b-5p	chr1:173834505	7-mer-A1	0.67	0	GAS5
miR-217	chr1:173836156	7-mer-m8	0.33	0.09	GAS5
miR-217	chr1:173836609	7-mer-m8	0.56	0	GAS5
miR-221/222/222ab/1928	chr1:173833269	8-mer	0.67	0	GAS5
miR-223	chr1:173835106	7-mer-m8	0.56	0.09	GAS5
miR-23abc/23b-3p	chr1:173833704	7-mer-m8	0.56	0.04	GAS5
miR-23abc/23b-3p	chr1:173835512	8-mer	0.22	0	GAS5
miR-24/24ab/24-3p	chr1:173834087	7-mer-A1	0.56	0	GAS5
miR-24/24ab/24-3p	chr1:173836387	7-mer-A1	0.67	0	GAS5
miR-26ab/1297/4465	chr1:173833308	7-mer-m8	0.56	0.35	GAS5
miR-26ab/1297/4465	chr1:173833329	7-mer-A1	0.44	0.78	GAS5
miR-29abcd	chr1:173836171	7-mer-m8	0.44	0.04	GAS5
miR-31	chr1:173833204	7-mer-m8	0.33	0	GAS5
miR-31	chr1:173834310	7-mer-m8	0.33	0	GAS5
miR-33a-3p/365/365-3p	chr1:173835339	7-mer-A1	0.67	0.04	GAS5
miR-425/425-5p/489	chr1:173834619	7-mer-A1	0.33	0	GAS5
miR-455-5p	chr1:173836806	7-mer-m8	0.56	0	GAS5
miR-490-3p	chr1:173833809	7-mer-A1	0.67	0.09	GAS5
miR-490-3p	chr1:173834256	7-mer-m8	0.22	0	GAS5
miR-499-5p	chr1:173835122	7-mer-A1	1	0.43	GAS5
miR-93/93a/105/106a/291a-3p/294/295/302abcde/372/373/428/519a/520be/520acd-3p/1378/1420ac	chr1:173838012	7-mer-m8	0.56	0	GAS5
miR-96/507/1271	chr1:173833557	7-mer-A1	0.89	0.87	GAS5
miR-135ab/135a-5p	chr5:134263388	7-mer-A1	0	0	MTND4P12
miR-140/140-5p/876-3p/1244	chr5:134263460	8-mer	0	0	MTND4P12
miR-140/140-5p/876-3p/1244	chr5:134263639	7-mer-m8	0	0	MTND4P12
let-7/98/4458/4500	chr5:134263438	7-mer-m8	0	0	MTND4P12
miR-196abc	chr5:134263515	7-mer-m8	0	0	MTND4P12
miR-217	chr5:134263025	7-mer-A1	0	0	MTND4P12
miR-219-5p/508/508-3p/4782-3p	chr5:134263495	7-mer-A1	0	0	MTND4P12
miR-223	chr5:134263682	7-mer-A1	0	0	MTND4P12
miR-24/24ab/24-3p	chr5:134263153	8-mer	0	0	MTND4P12
miR-103a/107/107ab	chr5:134263028	7-mer-A1	0	0	MTND4P12
miR-383	chr5:134262560	7-mer-A1	0	0	MTND4P12
miR-129-5p/129ab-5p	chr5:134263667	7-mer-A1	0	0	MTND4P12
